# Supplementary material
Source: PubMed Central journal article supplement (PMC3951131)
Supplement: NIHMS559534-supplement-01.pdf [file NIHMS559534-supplement-01.pdf]

Type of file: table

Label: Table S1

Filename: 2013-Kwon-Science-Hippo\_table\_S1.xls

## (A) entire PPIN

| Bait_ID     | Bait_Symbol | Prey_ID     | Prey_symbol   | SAINT score | Spectral Counts | SpecSum |
|-------------|-------------|-------------|---------------|-------------|-----------------|---------|
| FBgn0034970 | yki         | FBgn0020238 | 14-3-3epsilon | 1           | 103 103 117     | 323     |
| FBgn0034970 | yki         | FBgn0004907 | 14-3-3zeta    | 1           | 34 34 41        | 109     |
| FBgn0034970 | yki         | FBgn0011739 | wts           | 1           | 31 27 29        | 87      |
| FBgn0034970 | yki         | FBgn0035872 | CG7185        | 1           | 30 26 27        | 83      |
| FBgn0034970 | yki         | FBgn0030808 | RhoGAP15B     | 1           | 22 19 22        | 63      |
| FBgn0034970 | yki         | FBgn0037530 | CG2943        | 1           | 22 22 17        | 61      |
| FBgn0034970 | yki         | FBgn0035987 | CG3689        | 1           | 18 20 17        | 55      |
| FBgn0034970 | yki         | FBgn0036451 | CG9425        | 1           | 21 20 14        | 55      |
| FBgn0034970 | yki         | FBgn0031093 | CG9581        | 1           | 16 17 14        | 47      |
| FBgn0034970 | yki         | FBgn0036448 | mop           | 1           | 16 16 14        | 46      |
| FBgn0034970 | yki         | FBgn0028484 | Ack           | 1           | 14 13 13        | 40      |
| FBgn0034970 | yki         | FBgn0036373 | CG10741       | 1           | 13 11 14        | 38      |
| FBgn0034970 | yki         | FBgn0036318 | CG11009       | 1           | 14 9 14         | 37      |
| FBgn0034970 | yki         | FBgn0041092 | tai           | 1           | 12 10 10        | 32      |
| FBgn0034970 | yki         | FBgn0004583 | ex            | 1           | 11 8 12         | 31      |
| FBgn0034970 | yki         | FBgn0002921 | Atpalpha      | 1           | 9 13 6          | 28      |
| FBgn0034970 | yki         | FBgn0003345 | sd            | 1           | 10 9 8          | 27      |
| FBgn0034970 | yki         | FBgn0030243 | CG2186        | 1           | 8 7 8           | 23      |
| FBgn0034970 | yki         | FBgn0028490 | CG31705       | 1           | 6 8 7           | 21      |
| FBgn0034970 | yki         | FBgn0003277 | RplI215       | 0.98        | 5 6 4           | 15      |
| FBgn0034970 | yki         | FBgn0001218 | Hsc70-3       | 0.96        | 79 76 79        | 234     |
| FBgn0034970 | yki         | FBgn0025885 | Inos          | 0.96        | 6 8 8           | 22      |
| FBgn0034970 | yki         | FBgn0035715 | CG10103       | 0.96        | 4 6 4           | 14      |
| FBgn0034970 | yki         | FBgn0011571 | caz           | 0.91        | 5 3 3           | 11      |
| FBgn0034970 | yki         | FBgn0034417 | CG15117       | 0.9         | 7 3 7           | 17      |
| FBgn0034970 | yki         | FBgn0063485 | Lasp          | 0.9         | 5 3 4           | 12      |
| FBgn0034970 | yki         | FBgn0034646 | Rae1          | 0.89        | 4 3 3           | 10      |
| FBgn0034970 | yki         | FBgn0033339 | sec31         | 0.86        | 5 3 3           | 11      |
| FBgn0034970 | yki         | FBgn0037856 | CG4674        | 0.81        | 2 5 6           | 13      |
| FBgn0034970 | yki         | FBgn0037728 | CG16817       | 0.78        | 2 3 3           | 8       |
| FBgn0034970 | yki         | FBgn0033984 | Lap1          | 0.76        | 5 6 2           | 13      |
| FBgn0034970 | yki         | FBgn0035444 | CG12012       | 0.73        | 3 2 3           | 8       |
| FBgn0034970 | yki         | FBgn0037182 | CG6838        | 0.71        | 2 2 3           | 7       |
| FBgn0034970 | yki         | FBgn0034398 | CG15098       | 0.6         | 2 2 2           | 6       |
| FBgn0034970 | yki         | FBgn0033663 | ERp60         | 0.59        | 2 2 2           | 6       |
| FBgn0034970 | yki         | FBgn0031799 | Pez           | 0.57        | 3 2 3           | 8       |
| FBgn0034970 | yki         | FBgn0083961 | CG34125       | 0.54        | 3 1 2           | 6       |
| FBgn0034970 | yki         | FBgn0033836 | CG18278       | 0.52        | 4 1 2           | 7       |
| FBgn0034970 | yki         | FBgn0039507 | mrt           | 0.5         | 5 0 3           | 8       |
| FBgn0034970 | yki         | FBgn0052441 | CG32441       | 0.5         | 2 2 1           | 5       |
| FBgn0034970 | yki         | FBgn0034270 | CG6401        | 0.5         | 2 0 3           | 5       |
| FBgn0034970 | yki         | FBgn0031698 | CG14023       | 0.46        | 4 1 7           | 12      |
| FBgn0034970 | yki         | FBgn0040777 | CG14767       | 0.4         | 3 1 1           | 5       |
| FBgn0034970 | yki         | FBgn0000064 | Ald           | 0.38        | 3 2 3           | 8       |
| FBgn0034970 | yki         | FBgn0037607 | CG8036        | 0.38        | 1 1 4           | 6       |
| FBgn0034970 | yki         | FBgn0261458 | capt          | 0.35        | 2 1 2           | 5       |
| FBgn0034970 | yki         | FBgn0027548 | nito          | 0.35        | 2 0 3           | 5       |
| FBgn0034970 | yki         | FBgn0260442 | rhea          | 0.33        | 2 2 3           | 7       |
| FBgn0034970 | yki         | FBgn0053129 | CG33129       | 0.31        | 1 0 2           | 3       |
| FBgn0034970 | yki         | FBgn0033264 | Nup50         | 0.29        | 2 1 1           | 4       |

## (A) entire PPIN

|             |     |             |             |      |           |     |
|-------------|-----|-------------|-------------|------|-----------|-----|
| FBgn0034970 | yki | FBgn0052594 | be          | 0.28 | 2 1 2     | 5   |
| FBgn0034970 | yki | FBgn0033204 | CG2065      | 0.27 | 1 2 0     | 3   |
| FBgn0034970 | yki | FBgn0040308 | Jafrac2     | 0.21 | 1 0 2     | 3   |
| FBgn0034970 | yki | FBgn0035424 | CG11505     | 0.19 | 1 1 4     | 6   |
| FBgn0034970 | yki | FBgn0015905 | ast         | 0.13 | 2 0 1     | 3   |
| FBgn0034970 | yki | FBgn0010355 | Taf1        | 0.12 | 4 0 0     | 4   |
| FBgn0034970 | yki | FBgn0035499 | Chd64       | 0.01 | 14 11 12  | 37  |
| FBgn0034970 | yki | FBgn0028734 | Fmr1        | 0.01 | 1 3 5     | 9   |
| FBgn0034970 | yki | FBgn0025286 | RpL31       | 0.01 | 2 1 3     | 6   |
| FBgn0034970 | yki | FBgn0030136 | RpS28b      | 0.01 | 1 1 2     | 4   |
| FBgn0034970 | yki | FBgn0005634 | zip         | 0    | 84 93 111 | 288 |
| FBgn0034970 | yki | FBgn0001219 | Hsc70-4     | 0    | 40 39 42  | 121 |
| FBgn0034970 | yki | FBgn0003887 | betaTub56D  | 0    | 27 26 26  | 79  |
| FBgn0034970 | yki | FBgn0000042 | Act5C       | 0    | 28 24 23  | 75  |
| FBgn0034970 | yki | FBgn0000556 | Ef1alpha48D | 0    | 24 22 24  | 70  |
| FBgn0034970 | yki | FBgn0003884 | alphaTub84B | 0    | 18 16 15  | 49  |
| FBgn0034970 | yki | FBgn0262603 | sec8        | 0    | 18 3 21   | 42  |
| FBgn0034970 | yki | FBgn0001220 | Hsc70-5     | 0    | 10 8 10   | 28  |
| FBgn0034970 | yki | FBgn0003178 | PyK         | 0    | 9 7 11    | 27  |
| FBgn0034970 | yki | FBgn0003360 | sesB        | 0    | 8 8 9     | 25  |
| FBgn0034970 | yki | FBgn0002645 | Map205      | 0    | 8 7 6     | 21  |
| FBgn0034970 | yki | FBgn0001216 | Hsc70-1     | 0    | 7 6 8     | 21  |
| FBgn0034970 | yki | FBgn0263231 | bel         | 0    | 5 7 8     | 20  |
| FBgn0034970 | yki | FBgn0037891 | CG5214      | 0    | 7 6 6     | 19  |
| FBgn0034970 | yki | FBgn0002525 | Lam         | 0    | 4 6 6     | 16  |
| FBgn0034970 | yki | FBgn0027066 | Eb1         | 0    | 4 4 5     | 13  |
| FBgn0034970 | yki | FBgn0262734 | Rbp2        | 0    | 4 4 5     | 13  |
| FBgn0034970 | yki | FBgn0261619 | pAbp        | 0    | 5 3 4     | 12  |
| FBgn0034970 | yki | FBgn0003676 | T-cp1       | 0    | 3 4 3     | 10  |
| FBgn0034970 | yki | FBgn0011211 | blw         | 0    | 2 4 4     | 10  |
| FBgn0034970 | yki | FBgn0261710 | nocte       | 0    | 5 1 4     | 10  |
| FBgn0034970 | yki | FBgn0000044 | Act57B      | 0    | 4 1 4     | 9   |
| FBgn0034970 | yki | FBgn0035608 | blanks      | 0    | 2 2 4     | 8   |
| FBgn0034970 | yki | FBgn0020279 | lig         | 0    | 2 2 4     | 8   |
| FBgn0034970 | yki | FBgn0000559 | Ef2b        | 0    | 4 0 4     | 8   |
| FBgn0034970 | yki | FBgn0003888 | betaTub60D  | 0    | 3 2 3     | 8   |
| FBgn0034970 | yki | FBgn0004687 | Mlc-c       | 0    | 2 2 4     | 8   |
| FBgn0034970 | yki | FBgn0003261 | Rm62        | 0    | 0 2 6     | 8   |
| FBgn0034970 | yki | FBgn0034577 | cpa         | 0    | 2 1 5     | 8   |
| FBgn0034970 | yki | FBgn0051363 | Jupiter     | 0    | 3 2 2     | 7   |
| FBgn0034970 | yki | FBgn0011284 | RpS4        | 0    | 1 3 3     | 7   |
| FBgn0034970 | yki | FBgn0010198 | RpS15Aa     | 0    | 2 1 4     | 7   |
| FBgn0034970 | yki | FBgn0039757 | RpS7        | 0    | 3 2 2     | 7   |
| FBgn0034970 | yki | FBgn0028969 | deltaCOP    | 0    | 2 3 2     | 7   |
| FBgn0034970 | yki | FBgn0029176 | Ef1gamma    | 0    | 2 1 3     | 6   |
| FBgn0034970 | yki | FBgn0028737 | Ef1beta     | 0    | 0 3 3     | 6   |
| FBgn0034970 | yki | FBgn0000181 | bic         | 0    | 1 1 4     | 6   |
| FBgn0034970 | yki | FBgn0003890 | betaTub97EF | 0    | 2 2 2     | 6   |
| FBgn0034970 | yki | FBgn0001217 | Hsc70-2     | 0    | 2 2 2     | 6   |
| FBgn0034970 | yki | FBgn0027932 | Akap200     | 0    | 2 2 2     | 6   |
| FBgn0034970 | yki | FBgn0013726 | pnut        | 0    | 3 0 3     | 6   |

## (A) entire PPIN

|                        |                                |         |   |
|------------------------|--------------------------------|---------|---|
| FBgn0034970 <b>yki</b> | FBgn0261593 <b>RpS10b</b>      | 0 1 2 2 | 5 |
| FBgn0034970 <b>yki</b> | FBgn0015778 <b>rin</b>         | 0 2 0 3 | 5 |
| FBgn0034970 <b>yki</b> | FBgn0034743 <b>RpS16</b>       | 0 2 1 2 | 5 |
| FBgn0034970 <b>yki</b> | FBgn0001215 <b>Hrb98DE</b>     | 0 1 2 2 | 5 |
| FBgn0034970 <b>yki</b> | FBgn0001233 <b>Hsp83</b>       | 0 1 1 2 | 4 |
| FBgn0034970 <b>yki</b> | FBgn0046214 <b>vig2</b>        | 0 1 1 2 | 4 |
| FBgn0034970 <b>yki</b> | FBgn0034968 <b>RpL12</b>       | 0 1 1 2 | 4 |
| FBgn0034970 <b>yki</b> | FBgn0029093 <b>cathD</b>       | 0 1 2 1 | 4 |
| FBgn0034970 <b>yki</b> | FBgn0086904 <b>Nacalpa</b>     | 0 0 2 2 | 4 |
| FBgn0034970 <b>yki</b> | FBgn0038145 <b>Droj2</b>       | 0 2 2 0 | 4 |
| FBgn0034970 <b>yki</b> | FBgn0014029 <b>Sep2</b>        | 0 1 1 2 | 4 |
| FBgn0034970 <b>yki</b> | FBgn0011710 <b>Sep1</b>        | 0 2 0 2 | 4 |
| FBgn0034970 <b>yki</b> | FBgn0015756 <b>RpL9</b>        | 0 2 1 1 | 4 |
| FBgn0034970 <b>yki</b> | FBgn0003941 <b>RpL40</b>       | 0 2 1 1 | 4 |
| FBgn0034970 <b>yki</b> | FBgn0039300 <b>RpS27</b>       | 0 1 1 1 | 3 |
| FBgn0034970 <b>yki</b> | FBgn0039776 <b>PH4alphaEFB</b> | 0 1 0 2 | 3 |
| FBgn0034970 <b>yki</b> | FBgn0041188 <b>Atx2</b>        | 0 1 1 1 | 3 |
| FBgn0034970 <b>yki</b> | FBgn0034066 <b>CG8397</b>      | 0 1 1 1 | 3 |
| FBgn0034970 <b>yki</b> | FBgn0037707 <b>RnpS1</b>       | 0 1 1 1 | 3 |
| FBgn0034970 <b>yki</b> | FBgn0004237 <b>Hrb87F</b>      | 0 1 1 1 | 3 |
| FBgn0034970 <b>yki</b> | FBgn0013325 <b>RpL11</b>       | 0 1 1 1 | 3 |
| FBgn0034970 <b>yki</b> | FBgn0004867 <b>RpS2</b>        | 0 1 0 2 | 3 |
| FBgn0034970 <b>yki</b> | FBgn0001942 <b>eIF-4a</b>      | 0 1 1 1 | 3 |
| FBgn0034970 <b>yki</b> | FBgn0030699 <b>CG8578</b>      | 0 2 0 1 | 3 |
| FBgn0034970 <b>yki</b> | FBgn0013305 <b>Nmda1</b>       | 0 1 1 1 | 3 |
| FBgn0034970 <b>yki</b> | FBgn0032949 <b>Lamp1</b>       | 0 1 1 1 | 3 |
| FBgn0034970 <b>yki</b> | FBgn0020255 <b>ran</b>         | 0 1 1 1 | 3 |
| FBgn0034970 <b>yki</b> | FBgn0002622 <b>RpS3</b>        | 0 1 1 1 | 3 |
| FBgn0034970 <b>yki</b> | FBgn0015589 <b>Apc</b>         | 0 1 0 1 | 2 |
| FBgn0034970 <b>yki</b> | FBgn0030268 <b>Klp10A</b>      | 0 1 0 1 | 2 |
| FBgn0034970 <b>yki</b> | FBgn0053303 <b>CG33303</b>     | 0 0 0 2 | 2 |
| FBgn0034970 <b>yki</b> | FBgn0263198 <b>Acn</b>         | 0 1 1 0 | 2 |
| FBgn0034970 <b>yki</b> | FBgn0086902 <b>kis</b>         | 0 1 1 0 | 2 |
| FBgn0034970 <b>yki</b> | FBgn0042134 <b>Capr</b>        | 0 1 1 0 | 2 |
| FBgn0034970 <b>yki</b> | FBgn0034068 <b>casp</b>        | 0 1 0 1 | 2 |
| FBgn0034970 <b>yki</b> | FBgn0026761 <b>Trap1</b>       | 0 0 1 1 | 2 |
| FBgn0034970 <b>yki</b> | FBgn0032055 <b>CG13091</b>     | 0 1 0 1 | 2 |
| FBgn0034970 <b>yki</b> | FBgn0035471 <b>Sc2</b>         | 0 1 1 0 | 2 |
| FBgn0034970 <b>yki</b> | FBgn0022343 <b>CG3760</b>      | 0 1 0 1 | 2 |
| FBgn0034970 <b>yki</b> | FBgn0046706 <b>Haspin</b>      | 0 1 0 1 | 2 |
| FBgn0034970 <b>yki</b> | FBgn0010909 <b>msn</b>         | 0 1 1 0 | 2 |
| FBgn0034970 <b>yki</b> | FBgn0040309 <b>Jafrac1</b>     | 0 1 1 0 | 2 |
| FBgn0034970 <b>yki</b> | FBgn0011570 <b>cpb</b>         | 0 0 0 2 | 2 |
| FBgn0034970 <b>yki</b> | FBgn0053193 <b>sav</b>         | 0 1 1 0 | 2 |
| FBgn0034970 <b>yki</b> | FBgn0031977 <b>baf</b>         | 0 1 1 0 | 2 |
| FBgn0034970 <b>yki</b> | FBgn0003022 <b>Ote</b>         | 0 1 1 0 | 2 |
| FBgn0034970 <b>yki</b> | FBgn0037808 <b>Bruce</b>       | 0 0 0 1 | 1 |
| FBgn0034970 <b>yki</b> | FBgn0034253 <b>CG10936</b>     | 0 1 0 0 | 1 |
| FBgn0034970 <b>yki</b> | FBgn0026324 <b>Taf10b</b>      | 0 1 0 0 | 1 |
| FBgn0034970 <b>yki</b> | FBgn0004556 <b>Dbp73D</b>      | 0 1 0 0 | 1 |
| FBgn0034970 <b>yki</b> | FBgn0041180 <b>TepIV</b>       | 0 0 0 1 | 1 |

## (A) entire PPIN

|                        |                             |         |   |
|------------------------|-----------------------------|---------|---|
| FBgn0034970 <b>yki</b> | FBgn0050069 <b>CG30069</b>  | 0 1 0 0 | 1 |
| FBgn0034970 <b>yki</b> | FBgn0034307 <b>CG10914</b>  | 0 1 0 0 | 1 |
| FBgn0034970 <b>yki</b> | FBgn0030815 <b>CG8945</b>   | 0 1 0 0 | 1 |
| FBgn0034970 <b>yki</b> | FBgn0032633 <b>Lrch</b>     | 0 0 0 1 | 1 |
| FBgn0034970 <b>yki</b> | FBgn0039466 <b>CG5521</b>   | 0 1 0 0 | 1 |
| FBgn0034970 <b>yki</b> | FBgn0010348 <b>Arf79F</b>   | 0 1 0 0 | 1 |
| FBgn0034970 <b>yki</b> | FBgn0052580 <b>Muc14A</b>   | 0 0 1 0 | 1 |
| FBgn0034970 <b>yki</b> | FBgn0033890 <b>Ctf4</b>     | 0 0 0 1 | 1 |
| FBgn0034970 <b>yki</b> | FBgn0031381 <b>Npc2a</b>    | 0 1 0 0 | 1 |
| FBgn0034970 <b>yki</b> | FBgn0034715 <b>Oatp58Db</b> | 0 1 0 0 | 1 |
| FBgn0034970 <b>yki</b> | FBgn0041781 <b>SCAR</b>     | 0 0 0 1 | 1 |
| FBgn0034970 <b>yki</b> | FBgn0027494 <b>RpS10a</b>   | 0 0 1 0 | 1 |
| FBgn0034970 <b>yki</b> | FBgn0035571 <b>CG12493</b>  | 0 0 0 1 | 1 |
| FBgn0034970 <b>yki</b> | FBgn0033844 <b>bbc</b>      | 0 1 0 0 | 1 |
| FBgn0034970 <b>yki</b> | FBgn0051973 <b>Cda5</b>     | 0 0 0 1 | 1 |
| FBgn0034970 <b>yki</b> | FBgn0025455 <b>CycT</b>     | 0 1 0 0 | 1 |
| FBgn0034970 <b>yki</b> | FBgn0034368 <b>CG5482</b>   | 0 1 0 0 | 1 |
| FBgn0034970 <b>yki</b> | FBgn0023172 <b>RhoGEF2</b>  | 0 1 0 0 | 1 |
| FBgn0034970 <b>yki</b> | FBgn0051792 <b>CG31792</b>  | 0 1 0 0 | 1 |
| FBgn0034970 <b>yki</b> | FBgn0031251 <b>CG4213</b>   | 0 0 0 1 | 1 |
| FBgn0034970 <b>yki</b> | FBgn0011286 <b>Rya-r44F</b> | 0 0 0 1 | 1 |
| FBgn0034970 <b>yki</b> | FBgn0024987 <b>ssx</b>      | 0 1 0 0 | 1 |
| FBgn0034970 <b>yki</b> | FBgn0035612 <b>CG10625</b>  | 0 0 1 0 | 1 |
| FBgn0034970 <b>yki</b> | FBgn0004387 <b>Klp98A</b>   | 0 1 0 0 | 1 |
| FBgn0034970 <b>yki</b> | FBgn0086408 <b>stl</b>      | 0 1 0 0 | 1 |
| FBgn0034970 <b>yki</b> | FBgn0250871 <b>pot</b>      | 0 1 0 0 | 1 |
| FBgn0034970 <b>yki</b> | FBgn0261456 <b>hpo</b>      | 0 1 0 0 | 1 |
| FBgn0034970 <b>yki</b> | FBgn0024183 <b>vig</b>      | 0 0 1 0 | 1 |
| FBgn0034970 <b>yki</b> | FBgn0029118 <b>Sucb</b>     | 0 0 0 1 | 1 |
| FBgn0034970 <b>yki</b> | FBgn0036740 <b>CG6259</b>   | 0 0 1 0 | 1 |
| FBgn0034970 <b>yki</b> | FBgn0037468 <b>CG1943</b>   | 0 0 0 1 | 1 |
| FBgn0034970 <b>yki</b> | FBgn0000247 <b>ca</b>       | 0 1 0 0 | 1 |
| FBgn0034970 <b>yki</b> | FBgn0022768 <b>Pp2C1</b>    | 0 1 0 0 | 1 |
| FBgn0034970 <b>yki</b> | FBgn0035023 <b>itp</b>      | 0 1 0 0 | 1 |
| FBgn0034970 <b>yki</b> | FBgn0000709 <b>filil</b>    | 0 0 0 1 | 1 |
| FBgn0034970 <b>yki</b> | FBgn0014396 <b>tim</b>      | 0 1 0 0 | 1 |
| FBgn0034970 <b>yki</b> | FBgn0028687 <b>Rpt1</b>     | 0 0 1 0 | 1 |
| FBgn0034970 <b>yki</b> | FBgn0261279 <b>lqfR</b>     | 0 1 0 0 | 1 |
| FBgn0034970 <b>yki</b> | FBgn0031256 <b>CG4164</b>   | 0 0 0 1 | 1 |
| FBgn0034970 <b>yki</b> | FBgn0003575 <b>su(s)</b>    | 0 1 0 0 | 1 |
| FBgn0034970 <b>yki</b> | FBgn0034644 <b>CG10082</b>  | 0 0 0 1 | 1 |
| FBgn0034970 <b>yki</b> | FBgn0030925 <b>CG6361</b>   | 0 0 0 1 | 1 |
| FBgn0034970 <b>yki</b> | FBgn0030266 <b>CG11122</b>  | 0 0 1 0 | 1 |
| FBgn0034970 <b>yki</b> | FBgn0261641 <b>CG42724</b>  | 0 0 0 1 | 1 |
| FBgn0034970 <b>yki</b> | FBgn0035379 <b>spz5</b>     | 0 0 0 1 | 1 |
| FBgn0034970 <b>yki</b> | FBgn0028507 <b>CG3793</b>   | 0 0 0 1 | 1 |
| FBgn0034970 <b>yki</b> | FBgn0052056 <b>scramb1</b>  | 0 0 1 0 | 1 |
| FBgn0034970 <b>yki</b> | FBgn0031451 <b>CG9961</b>   | 0 1 0 0 | 1 |
| FBgn0034970 <b>yki</b> | FBgn0260990 <b>yata</b>     | 0 0 0 1 | 1 |
| FBgn0034970 <b>yki</b> | FBgn0003459 <b>stwl</b>     | 0 1 0 0 | 1 |
| FBgn0034970 <b>yki</b> | FBgn0030794 <b>CG13005</b>  | 0 0 0 1 | 1 |

## (A) entire PPIN

|                        |                                |            |    |
|------------------------|--------------------------------|------------|----|
| FBgn0034970 <b>yki</b> | FBgn0250814 <b>CG4169</b>      | 0 0 0 1    | 1  |
| FBgn0034970 <b>yki</b> | FBgn0021795 <b>Tapdelta</b>    | 0 0 1 0    | 1  |
| FBgn0034970 <b>yki</b> | FBgn0001224 <b>Hsp23</b>       | 0 1 0 0    | 1  |
| FBgn0034970 <b>yki</b> | FBgn0027616 <b>YT521-B</b>     | 0 1 0 0    | 1  |
| FBgn0034970 <b>yki</b> | FBgn0051352 <b>Unc-115a</b>    | 0 0 0 1    | 1  |
| FBgn0034970 <b>yki</b> | FBgn0034734 <b>CG4554</b>      | 0 1 0 0    | 1  |
| FBgn0034970 <b>yki</b> | FBgn0036824 <b>CG3902</b>      | 0 1 0 0    | 1  |
| FBgn0034970 <b>yki</b> | FBgn0038773 <b>CG10887</b>     | 0 0 0 1    | 1  |
| FBgn0034970 <b>yki</b> | FBgn0262601 <b>SmB</b>         | 0 0 1 0    | 1  |
| FBgn0034970 <b>yki</b> | FBgn0259685 <b>crb</b>         | 0 0 0 1    | 1  |
| FBgn0034970 <b>yki</b> | FBgn0033029 <b>I(2)NC136</b>   | 0 1 0 0    | 1  |
| FBgn0034970 <b>yki</b> | FBgn0025833 <b>CG8910</b>      | 0 1 0 0    | 1  |
| FBgn0034970 <b>yki</b> | FBgn0004878 <b>cas</b>         | 0 1 0 0    | 1  |
| FBgn0034970 <b>yki</b> | FBgn0037282 <b>CG14657</b>     | 0 0 0 1    | 1  |
| FBgn0034970 <b>yki</b> | FBgn0261609 <b>eIF-2alpha</b>  | 0 1 0 0    | 1  |
| FBgn0034970 <b>yki</b> | FBgn0050275 <b>CG30275</b>     | 0 1 0 0    | 1  |
| FBgn0034970 <b>yki</b> | FBgn0029687 <b>Vap-33-1</b>    | 0 0 0 1    | 1  |
| FBgn0034970 <b>yki</b> | FBgn0040284 <b>SF2</b>         | 0 0 1 0    | 1  |
| FBgn0034970 <b>yki</b> | FBgn0086129 <b>sname</b>       | 0 1 0 0    | 1  |
| FBgn0034970 <b>yki</b> | FBgn0004888 <b>Scsalpha</b>    | 0 0 0 1    | 1  |
| FBgn0034970 <b>yki</b> | FBgn0002543 <b>lea</b>         | 0 0 0 1    | 1  |
| FBgn0034970 <b>yki</b> | FBgn0037719 <b>bocksbeutel</b> | 0 1 0 0    | 1  |
| FBgn0034970 <b>yki</b> | FBgn0263144 <b>bin3</b>        | 0 1 0 0    | 1  |
| FBgn0034970 <b>yki</b> | FBgn0010240 <b>Lcch3</b>       | 0 0 0 1    | 1  |
| FBgn0034970 <b>yki</b> | FBgn0023167 <b>SmD3</b>        | 0 0 0 1    | 1  |
| FBgn0034970 <b>yki</b> | FBgn0025865 <b>Cortactin</b>   | 0 0 0 1    | 1  |
| FBgn0034970 <b>yki</b> | FBgn0028327 <b>I(1)G0320</b>   | 0 0 0 1    | 1  |
| FBgn0034970 <b>yki</b> | FBgn0010411 <b>RpS18</b>       | 0 0 1 0    | 1  |
| FBgn0034970 <b>yki</b> | FBgn0024238 <b>Fim</b>         | 0 0 0 1    | 1  |
| FBgn0034970 <b>yki</b> | FBgn0261574 <b>kug</b>         | 0 0 1 0    | 1  |
| FBgn0034970 <b>yki</b> | FBgn0028382 <b>cyp33</b>       | 0 1 0 0    | 1  |
| FBgn0034970 <b>yki</b> | FBgn0032105 <b>borr</b>        | 0 0 0 1    | 1  |
| FBgn0034970 <b>yki</b> | FBgn0004595 <b>pros</b>        | 0 1 0 0    | 1  |
| FBgn0034970 <b>yki</b> | FBgn0028675 <b>Sur</b>         | 0 1 0 0    | 1  |
| FBgn0034970 <b>yki</b> | FBgn0034308 <b>CG10915</b>     | 0 1 0 0    | 1  |
| FBgn0034970 <b>yki</b> | FBgn0026409 <b>Mpcp</b>        | 0 0 0 1    | 1  |
| FBgn0034970 <b>yki</b> | FBgn0024509 <b>sec13</b>       | 0 0 1 0    | 1  |
| FBgn0034970 <b>yki</b> | FBgn0019949 <b>Cdk9</b>        | 0 1 0 0    | 1  |
| FBgn0034970 <b>yki</b> | FBgn0039645 <b>CG11898</b>     | 0 1 0 0    | 1  |
| FBgn0034970 <b>yki</b> | FBgn0001225 <b>Hsp26</b>       | 0 0 0 1    | 1  |
| FBgn0034970 <b>yki</b> | FBgn0262127 <b>kibra</b>       | 0 0 0 1    | 1  |
| FBgn0034970 <b>yki</b> | FBgn0004838 <b>Hrb27C</b>      | 0 0 0 1    | 1  |
| FBgn0011739 <b>wts</b> | FBgn0010246 <b>Myo61F</b>      | 1 31 19 16 | 66 |
| FBgn0011739 <b>wts</b> | FBgn0034970 <b>yki</b>         | 1 18 22 22 | 62 |
| FBgn0011739 <b>wts</b> | FBgn0039776 <b>PH4alphaEFB</b> | 1 15 13 19 | 47 |
| FBgn0011739 <b>wts</b> | FBgn0038965 <b>mats</b>        | 1 7 8 10   | 25 |
| FBgn0011739 <b>wts</b> | FBgn0263006 <b>Ca-P60A</b>     | 1 6 10 6   | 22 |
| FBgn0011739 <b>wts</b> | FBgn0051453 <b>pch2</b>        | 1 5 8 7    | 20 |
| FBgn0011739 <b>wts</b> | FBgn0027084 <b>Aats-lys</b>    | 1 5 6 6    | 17 |
| FBgn0011739 <b>wts</b> | FBgn0033062 <b>Ars2</b>        | 0.99 8 5 9 | 22 |
| FBgn0011739 <b>wts</b> | FBgn0261524 <b>lic</b>         | 0.99 5 5 8 | 18 |

## (A) entire PPIN

|             |            |             |                   |             |          |    |
|-------------|------------|-------------|-------------------|-------------|----------|----|
| FBgn0011739 | <b>wts</b> | FBgn0035811 | <b>CG12262</b>    | <b>0.99</b> | 6 6 6    | 18 |
| FBgn0011739 | <b>wts</b> | FBgn0263594 | <b>lost</b>       | <b>0.97</b> | 4 5 5    | 14 |
| FBgn0011739 | <b>wts</b> | FBgn0013770 | <b>Cp1</b>        | <b>0.96</b> | 5 3 5    | 13 |
| FBgn0011739 | <b>wts</b> | FBgn0037312 | <b>CG11999</b>    | <b>0.94</b> | 3 4 4    | 11 |
| FBgn0011739 | <b>wts</b> | FBgn0027329 | <b>Tcp-1zeta</b>  | <b>0.91</b> | 7 8 9    | 24 |
| FBgn0011739 | <b>wts</b> | FBgn0028479 | <b>CG4389</b>     | <b>0.91</b> | 4 6 4    | 14 |
| FBgn0011739 | <b>wts</b> | FBgn0011225 | <b>jar</b>        | <b>0.89</b> | 26 13 11 | 50 |
| FBgn0011739 | <b>wts</b> | FBgn0004378 | <b>Klp61F</b>     | <b>0.88</b> | 3 3 3    | 9  |
| FBgn0011739 | <b>wts</b> | FBgn0014010 | <b>Rab5</b>       | <b>0.84</b> | 2 4 4    | 10 |
| FBgn0011739 | <b>wts</b> | FBgn0030612 | <b>CG5599</b>     | <b>0.82</b> | 4 4 4    | 12 |
| FBgn0011739 | <b>wts</b> | FBgn0014189 | <b>Hel25E</b>     | <b>0.79</b> | 11 9 9   | 29 |
| FBgn0011739 | <b>wts</b> | FBgn0040007 | <b>RpL38</b>      | <b>0.79</b> | 3 2 3    | 8  |
| FBgn0011739 | <b>wts</b> | FBgn0035500 | <b>ens</b>        | <b>0.78</b> | 3 2 3    | 8  |
| FBgn0011739 | <b>wts</b> | FBgn0053303 | <b>CG33303</b>    | <b>0.77</b> | 9 11 10  | 30 |
| FBgn0011739 | <b>wts</b> | FBgn0260462 | <b>CG12163</b>    | <b>0.72</b> | 3 3 2    | 8  |
| FBgn0011739 | <b>wts</b> | FBgn0020633 | <b>Mcm7</b>       | <b>0.71</b> | 1 3 4    | 8  |
| FBgn0011739 | <b>wts</b> | FBgn0037643 | <b>skap</b>       | <b>0.7</b>  | 5 2 6    | 13 |
| FBgn0011739 | <b>wts</b> | FBgn0035688 | <b>CG10289</b>    | <b>0.69</b> | 3 2 2    | 7  |
| FBgn0011739 | <b>wts</b> | FBgn0030993 | <b>Mec2</b>       | <b>0.67</b> | 8 6 9    | 23 |
| FBgn0011739 | <b>wts</b> | FBgn0038476 | <b>kuk</b>        | <b>0.67</b> | 3 1 4    | 8  |
| FBgn0011739 | <b>wts</b> | FBgn0000253 | <b>Cam</b>        | <b>0.65</b> | 9 5 4    | 18 |
| FBgn0011739 | <b>wts</b> | FBgn0010352 | <b>Nc73EF</b>     | <b>0.63</b> | 2 4 4    | 10 |
| FBgn0011739 | <b>wts</b> | FBgn0016685 | <b>Nlp</b>        | <b>0.59</b> | 2 2 2    | 6  |
| FBgn0011739 | <b>wts</b> | FBgn0037607 | <b>CG8036</b>     | <b>0.58</b> | 1 3 4    | 8  |
| FBgn0011739 | <b>wts</b> | FBgn0032961 | <b>CG1416</b>     | <b>0.58</b> | 3 1 3    | 7  |
| FBgn0011739 | <b>wts</b> | FBgn0250848 | <b>26-29-p</b>    | <b>0.56</b> | 2 2 2    | 6  |
| FBgn0011739 | <b>wts</b> | FBgn0032393 | <b>CG12264</b>    | <b>0.56</b> | 2 1 3    | 6  |
| FBgn0011739 | <b>wts</b> | FBgn0039359 | <b>RpL27</b>      | <b>0.52</b> | 2 1 3    | 6  |
| FBgn0011739 | <b>wts</b> | FBgn0010438 | <b>mtSSB</b>      | <b>0.51</b> | 4 3 2    | 9  |
| FBgn0011739 | <b>wts</b> | FBgn0010342 | <b>Map60</b>      | <b>0.51</b> | 2 1 3    | 6  |
| FBgn0011739 | <b>wts</b> | FBgn0039635 | <b>CG11876</b>    | <b>0.51</b> | 1 2 2    | 5  |
| FBgn0011739 | <b>wts</b> | FBgn0034181 | <b>CG8963</b>     | <b>0.51</b> | 1 2 2    | 5  |
| FBgn0011739 | <b>wts</b> | FBgn0002921 | <b>Atpalpha</b>   | <b>0.48</b> | 2 2 4    | 8  |
| FBgn0011739 | <b>wts</b> | FBgn0029093 | <b>cathD</b>      | <b>0.47</b> | 5 8 8    | 21 |
| FBgn0011739 | <b>wts</b> | FBgn0019936 | <b>RpS20</b>      | <b>0.47</b> | 6 6 6    | 18 |
| FBgn0011739 | <b>wts</b> | FBgn0086768 | <b>Pcmt</b>       | <b>0.47</b> | 1 2 2    | 5  |
| FBgn0011739 | <b>wts</b> | FBgn0003517 | <b>sta</b>        | <b>0.46</b> | 2 2 1    | 5  |
| FBgn0011739 | <b>wts</b> | FBgn0250814 | <b>CG4169</b>     | <b>0.45</b> | 11 7 7   | 25 |
| FBgn0011739 | <b>wts</b> | FBgn0022288 | <b>I(2)09851</b>  | <b>0.45</b> | 2 4 2    | 8  |
| FBgn0011739 | <b>wts</b> | FBgn0261014 | <b>TER94</b>      | <b>0.45</b> | 1 3 2    | 6  |
| FBgn0011739 | <b>wts</b> | FBgn0027338 | <b>Kap-alpha3</b> | <b>0.45</b> | 1 2 2    | 5  |
| FBgn0011739 | <b>wts</b> | FBgn0041775 | <b>tral</b>       | <b>0.44</b> | 1 3 5    | 9  |
| FBgn0011739 | <b>wts</b> | FBgn0086443 | <b>Aats-asn</b>   | <b>0.44</b> | 2 2 1    | 5  |
| FBgn0011739 | <b>wts</b> | FBgn0039300 | <b>RpS27</b>      | <b>0.43</b> | 6 4 5    | 15 |
| FBgn0011739 | <b>wts</b> | FBgn0031310 | <b>CG4764</b>     | <b>0.43</b> | 1 0 4    | 5  |
| FBgn0011739 | <b>wts</b> | FBgn0029118 | <b>Suchb</b>      | <b>0.42</b> | 4 5 7    | 16 |
| FBgn0011739 | <b>wts</b> | FBgn0039713 | <b>RpS8</b>       | <b>0.42</b> | 3 2 0    | 5  |
| FBgn0011739 | <b>wts</b> | FBgn0032643 | <b>CG6453</b>     | <b>0.42</b> | 1 1 3    | 5  |
| FBgn0011739 | <b>wts</b> | FBgn0261609 | <b>eIF-2alpha</b> | <b>0.41</b> | 4 4 6    | 14 |
| FBgn0011739 | <b>wts</b> | FBgn0015797 | <b>Rab6</b>       | <b>0.41</b> | 2 3 1    | 6  |
| FBgn0011739 | <b>wts</b> | FBgn0046214 | <b>vig2</b>       | <b>0.4</b>  | 4 5 5    | 14 |

## (A) entire PPIN

|             |            |             |                    |      |         |    |
|-------------|------------|-------------|--------------------|------|---------|----|
| FBgn0011739 | <b>wts</b> | FBgn0022959 | <b>yps</b>         | 0.4  | 3 3 3   | 9  |
| FBgn0011739 | <b>wts</b> | FBgn0038293 | <b>CG6904</b>      | 0.4  | 0 2 2   | 4  |
| FBgn0011739 | <b>wts</b> | FBgn0020618 | <b>Rack1</b>       | 0.38 | 4 3 3   | 10 |
| FBgn0011739 | <b>wts</b> | FBgn0005674 | <b>Aats-glupro</b> | 0.38 | 0 3 5   | 8  |
| FBgn0011739 | <b>wts</b> | FBgn0043884 | <b>mask</b>        | 0.38 | 1 3 2   | 6  |
| FBgn0011739 | <b>wts</b> | FBgn0017545 | <b>RpS3A</b>       | 0.36 | 5 4 4   | 13 |
| FBgn0011739 | <b>wts</b> | FBgn0261618 | <b>larp</b>        | 0.36 | 2 1 1   | 4  |
| FBgn0011739 | <b>wts</b> | FBgn0004401 | <b>Pep</b>         | 0.35 | 3 2 3   | 8  |
| FBgn0011739 | <b>wts</b> | FBgn0053193 | <b>sav</b>         | 0.35 | 0 8 0   | 8  |
| FBgn0011739 | <b>wts</b> | FBgn0040284 | <b>SF2</b>         | 0.35 | 0 4 0   | 4  |
| FBgn0011739 | <b>wts</b> | FBgn0032906 | <b>RPA2</b>        | 0.34 | 2 0 1   | 3  |
| FBgn0011739 | <b>wts</b> | FBgn0031066 | <b>CG14235</b>     | 0.33 | 2 1 1   | 4  |
| FBgn0011739 | <b>wts</b> | FBgn0030672 | <b>CG9281</b>      | 0.32 | 3 4 3   | 10 |
| FBgn0011739 | <b>wts</b> | FBgn0029897 | <b>RpL17</b>       | 0.32 | 1 2 0   | 3  |
| FBgn0011739 | <b>wts</b> | FBgn0011016 | <b>SsRbeta</b>     | 0.31 | 1 2 2   | 5  |
| FBgn0011739 | <b>wts</b> | FBgn0015282 | <b>Pros26.4</b>    | 0.31 | 0 1 2   | 3  |
| FBgn0011739 | <b>wts</b> | FBgn0003600 | <b>Su(var)3-9</b>  | 0.3  | 1 2 1   | 4  |
| FBgn0011739 | <b>wts</b> | FBgn0002787 | <b>Mov34</b>       | 0.3  | 0 1 2   | 3  |
| FBgn0011739 | <b>wts</b> | FBgn0024509 | <b>sec13</b>       | 0.29 | 1 0 2   | 3  |
| FBgn0011739 | <b>wts</b> | FBgn0004227 | <b>nonA</b>        | 0.28 | 5 2 5   | 12 |
| FBgn0011739 | <b>wts</b> | FBgn0064225 | <b>RpL5</b>        | 0.28 | 1 2 3   | 6  |
| FBgn0011739 | <b>wts</b> | FBgn0038805 | <b>TFAM</b>        | 0.27 | 4 4 2   | 10 |
| FBgn0011739 | <b>wts</b> | FBgn0020255 | <b>ran</b>         | 0.26 | 2 2 3   | 7  |
| FBgn0011739 | <b>wts</b> | FBgn0023167 | <b>SmD3</b>        | 0.26 | 0 2 1   | 3  |
| FBgn0011739 | <b>wts</b> | FBgn0020235 | <b>ATPsyn-gamn</b> | 0.26 | 1 0 2   | 3  |
| FBgn0011739 | <b>wts</b> | FBgn0261380 | <b>mRpL37</b>      | 0.25 | 0 2 1   | 3  |
| FBgn0011739 | <b>wts</b> | FBgn0010173 | <b>RpA-70</b>      | 0.24 | 6 5 1   | 12 |
| FBgn0011739 | <b>wts</b> | FBgn0261606 | <b>RpL27A</b>      | 0.24 | 1 2 0   | 3  |
| FBgn0011739 | <b>wts</b> | FBgn0036763 | <b>CG7441</b>      | 0.24 | 1 0 2   | 3  |
| FBgn0011739 | <b>wts</b> | FBgn0032731 | <b>CG10641</b>     | 0.23 | 8 3 0   | 11 |
| FBgn0011739 | <b>wts</b> | FBgn0034743 | <b>RpS16</b>       | 0.22 | 10 9 10 | 29 |
| FBgn0011739 | <b>wts</b> | FBgn0053105 | <b>p24-2</b>       | 0.22 | 0 2 0   | 2  |
| FBgn0011739 | <b>wts</b> | FBgn0262716 | <b>Arp66B</b>      | 0.21 | 8 3 3   | 14 |
| FBgn0011739 | <b>wts</b> | FBgn0010411 | <b>RpS18</b>       | 0.21 | 2 3 2   | 7  |
| FBgn0011739 | <b>wts</b> | FBgn0004907 | <b>14-3-3zeta</b>  | 0.2  | 3 2 2   | 7  |
| FBgn0011739 | <b>wts</b> | FBgn0005533 | <b>RpS17</b>       | 0.2  | 2 2 3   | 7  |
| FBgn0011739 | <b>wts</b> | FBgn0033844 | <b>bbc</b>         | 0.2  | 1 2 1   | 4  |
| FBgn0011739 | <b>wts</b> | FBgn0034259 | <b>CG6459</b>      | 0.2  | 2 0 0   | 2  |
| FBgn0011739 | <b>wts</b> | FBgn0025885 | <b>Inos</b>        | 0.19 | 3 1 4   | 8  |
| FBgn0011739 | <b>wts</b> | FBgn0010909 | <b>msn</b>         | 0.19 | 0 2 1   | 3  |
| FBgn0011739 | <b>wts</b> | FBgn0002069 | <b>Aats-asp</b>    | 0.19 | 0 2 0   | 2  |
| FBgn0011739 | <b>wts</b> | FBgn0026409 | <b>Mpcp</b>        | 0.18 | 2 1 2   | 5  |
| FBgn0011739 | <b>wts</b> | FBgn0029687 | <b>Vap-33-1</b>    | 0.18 | 0 2 0   | 2  |
| FBgn0011739 | <b>wts</b> | FBgn0031497 | <b>CG17259</b>     | 0.18 | 0 0 2   | 2  |
| FBgn0011739 | <b>wts</b> | FBgn0262467 | <b>Scox</b>        | 0.18 | 2 0 0   | 2  |
| FBgn0011739 | <b>wts</b> | FBgn0036822 | <b>CG11637</b>     | 0.18 | 0 2 0   | 2  |
| FBgn0011739 | <b>wts</b> | FBgn0032198 | <b>eEF1delta</b>   | 0.17 | 2 1 1   | 4  |
| FBgn0011739 | <b>wts</b> | FBgn0030692 | <b>mRpS30</b>      | 0.16 | 0 0 2   | 2  |
| FBgn0011739 | <b>wts</b> | FBgn0032444 | <b>CG5525</b>      | 0.15 | 4 1 5   | 10 |
| FBgn0011739 | <b>wts</b> | FBgn0261596 | <b>RpS24</b>       | 0.15 | 2 1 1   | 4  |
| FBgn0011739 | <b>wts</b> | FBgn0015664 | <b>Dref</b>        | 0.15 | 0 1 2   | 3  |



## (A) entire PPIN

|             |            |             |                     |             |          |    |
|-------------|------------|-------------|---------------------|-------------|----------|----|
| FBgn0011739 | <b>wts</b> | FBgn0015218 | <b>eIF-4E</b>       | <b>0.15</b> | 0 1 2    | 3  |
| FBgn0011739 | <b>wts</b> | FBgn0011823 | <b>Pen</b>          | <b>0.15</b> | 0 0 2    | 2  |
| FBgn0011739 | <b>wts</b> | FBgn0010575 | <b>sbb</b>          | <b>0.15</b> | 2 0 0    | 2  |
| FBgn0011739 | <b>wts</b> | FBgn0013756 | <b>Mtor</b>         | <b>0.14</b> | 3 1 9    | 13 |
| FBgn0011739 | <b>wts</b> | FBgn0041188 | <b>Atx2</b>         | <b>0.14</b> | 2 1 3    | 6  |
| FBgn0011739 | <b>wts</b> | FBgn0034237 | <b>eIF3-S9</b>      | <b>0.14</b> | 0 2 2    | 4  |
| FBgn0011739 | <b>wts</b> | FBgn0032454 | <b>CG5787</b>       | <b>0.14</b> | 0 0 3    | 3  |
| FBgn0011739 | <b>wts</b> | FBgn0001942 | <b>eIF-4a</b>       | <b>0.13</b> | 11 9 15  | 35 |
| FBgn0011739 | <b>wts</b> | FBgn0063485 | <b>Lasp</b>         | <b>0.13</b> | 0 0 2    | 2  |
| FBgn0011739 | <b>wts</b> | FBgn0003676 | <b>T-cp1</b>        | <b>0.12</b> | 11 12 14 | 37 |
| FBgn0011739 | <b>wts</b> | FBgn0039302 | <b>Nup358</b>       | <b>0.12</b> | 0 0 2    | 2  |
| FBgn0011739 | <b>wts</b> | FBgn0023213 | <b>eIF4G</b>        | <b>0.11</b> | 0 2 0    | 2  |
| FBgn0011739 | <b>wts</b> | FBgn0025286 | <b>RpL31</b>        | <b>0.1</b>  | 3 4 3    | 10 |
| FBgn0011739 | <b>wts</b> | FBgn0031437 | <b>p16-ARC</b>      | <b>0.1</b>  | 5 2 2    | 9  |
| FBgn0011739 | <b>wts</b> | FBgn0021795 | <b>Tapdelta</b>     | <b>0.1</b>  | 1 1 2    | 4  |
| FBgn0011739 | <b>wts</b> | FBgn0025352 | <b>Thiolase</b>     | <b>0.1</b>  | 1 1 2    | 4  |
| FBgn0011739 | <b>wts</b> | FBgn0031741 | <b>CG11034</b>      | <b>0.1</b>  | 2 0 0    | 2  |
| FBgn0011739 | <b>wts</b> | FBgn0003261 | <b>Rm62</b>         | <b>0.09</b> | 7 10 5   | 22 |
| FBgn0011739 | <b>wts</b> | FBgn0030943 | <b>CG6540</b>       | <b>0.09</b> | 1 2 2    | 5  |
| FBgn0011739 | <b>wts</b> | FBgn0035987 | <b>CG3689</b>       | <b>0.09</b> | 1 2 1    | 4  |
| FBgn0011739 | <b>wts</b> | FBgn0001197 | <b>His2Av</b>       | <b>0.09</b> | 2 2 0    | 4  |
| FBgn0011739 | <b>wts</b> | FBgn0082582 | <b>tmod</b>         | <b>0.08</b> | 14 8 12  | 34 |
| FBgn0011739 | <b>wts</b> | FBgn0010280 | <b>Taf4</b>         | <b>0.08</b> | 2 0 0    | 2  |
| FBgn0011739 | <b>wts</b> | FBgn0004167 | <b>kst</b>          | <b>0.07</b> | 4 4 6    | 14 |
| FBgn0011739 | <b>wts</b> | FBgn0028687 | <b>Rpt1</b>         | <b>0.07</b> | 2 2 4    | 8  |
| FBgn0011739 | <b>wts</b> | FBgn0030354 | <b>Upf1</b>         | <b>0.07</b> | 0 0 2    | 2  |
| FBgn0011739 | <b>wts</b> | FBgn0003888 | <b>betaTub60D</b>   | <b>0.06</b> | 9 8 10   | 27 |
| FBgn0011739 | <b>wts</b> | FBgn0028734 | <b>Fmr1</b>         | <b>0.06</b> | 6 6 5    | 17 |
| FBgn0011739 | <b>wts</b> | FBgn0261397 | <b>didum</b>        | <b>0.06</b> | 9 3 2    | 14 |
| FBgn0011739 | <b>wts</b> | FBgn0033039 | <b>gp210</b>        | <b>0.06</b> | 0 1 2    | 3  |
| FBgn0011739 | <b>wts</b> | FBgn0032363 | <b>CG6509</b>       | <b>0.06</b> | 0 1 2    | 3  |
| FBgn0011739 | <b>wts</b> | FBgn0086710 | <b>RpL30</b>        | <b>0.05</b> | 2 2 2    | 6  |
| FBgn0011739 | <b>wts</b> | FBgn0011284 | <b>RpS4</b>         | <b>0.04</b> | 12 7 8   | 27 |
| FBgn0011739 | <b>wts</b> | FBgn0028969 | <b>deltaCOP</b>     | <b>0.04</b> | 3 4 5    | 12 |
| FBgn0011739 | <b>wts</b> | FBgn0000173 | <b>ben</b>          | <b>0.04</b> | 2 3 3    | 8  |
| FBgn0011739 | <b>wts</b> | FBgn0053868 | <b>His2B:CG3386</b> | <b>0.04</b> | 2 1 1    | 4  |
| FBgn0011739 | <b>wts</b> | FBgn0038145 | <b>Droj2</b>        | <b>0.03</b> | 10 10 13 | 33 |
| FBgn0011739 | <b>wts</b> | FBgn0010408 | <b>RpS9</b>         | <b>0.03</b> | 3 3 4    | 10 |
| FBgn0011739 | <b>wts</b> | FBgn0002593 | <b>RpLP1</b>        | <b>0.03</b> | 0 1 2    | 3  |
| FBgn0011739 | <b>wts</b> | FBgn0024308 | <b>Smr</b>          | <b>0.03</b> | 0 0 2    | 2  |
| FBgn0011739 | <b>wts</b> | FBgn0263391 | <b>hts</b>          | <b>0.02</b> | 5 6 9    | 20 |
| FBgn0011739 | <b>wts</b> | FBgn0087035 | <b>AGO2</b>         | <b>0.02</b> | 3 4 5    | 12 |
| FBgn0011739 | <b>wts</b> | FBgn0015268 | <b>Nap1</b>         | <b>0.02</b> | 2 1 2    | 5  |
| FBgn0011739 | <b>wts</b> | FBgn0028695 | <b>Rpn1</b>         | <b>0.02</b> | 0 0 2    | 2  |
| FBgn0011739 | <b>wts</b> | FBgn0086656 | <b>shrb</b>         | <b>0.02</b> | 2 0 0    | 2  |
| FBgn0011739 | <b>wts</b> | FBgn0003514 | <b>sqh</b>          | <b>0.01</b> | 17 15 16 | 48 |
| FBgn0011739 | <b>wts</b> | FBgn0261619 | <b>pAbp</b>         | <b>0.01</b> | 12 8 10  | 30 |
| FBgn0011739 | <b>wts</b> | FBgn0263396 | <b>sqd</b>          | <b>0.01</b> | 3 6 6    | 15 |
| FBgn0011739 | <b>wts</b> | FBgn0010078 | <b>RpL23</b>        | <b>0.01</b> | 5 3 6    | 14 |
| FBgn0011739 | <b>wts</b> | FBgn0039580 | <b>Gfat2</b>        | <b>0.01</b> | 2 1 2    | 5  |
| FBgn0011739 | <b>wts</b> | FBgn0035033 | <b>CG3548</b>       | <b>0.01</b> | 3 1 0    | 4  |

## (A) entire PPIN

|             |            |             |                    |             |             |     |
|-------------|------------|-------------|--------------------|-------------|-------------|-----|
| FBgn0011739 | <b>wts</b> | FBgn0263106 | <b>DnaJ-1</b>      | <b>0.01</b> | 2 0 2       | 4   |
| FBgn0011739 | <b>wts</b> | FBgn0005634 | <b>zip</b>         | <b>0</b>    | 252 232 222 | 706 |
| FBgn0011739 | <b>wts</b> | FBgn0000556 | <b>Ef1alpha48D</b> | <b>0</b>    | 59 53 55    | 167 |
| FBgn0011739 | <b>wts</b> | FBgn0001219 | <b>Hsc70-4</b>     | <b>0</b>    | 49 53 55    | 157 |
| FBgn0011739 | <b>wts</b> | FBgn0003887 | <b>betaTub56D</b>  | <b>0</b>    | 45 45 50    | 140 |
| FBgn0011739 | <b>wts</b> | FBgn0000042 | <b>Act5C</b>       | <b>0</b>    | 36 36 43    | 115 |
| FBgn0011739 | <b>wts</b> | FBgn0000709 | <b>filil</b>       | <b>0</b>    | 41 28 31    | 100 |
| FBgn0011739 | <b>wts</b> | FBgn0002525 | <b>Lam</b>         | <b>0</b>    | 30 34 32    | 96  |
| FBgn0011739 | <b>wts</b> | FBgn0003178 | <b>PyK</b>         | <b>0</b>    | 28 29 31    | 88  |
| FBgn0011739 | <b>wts</b> | FBgn0003884 | <b>alphaTub84B</b> | <b>0</b>    | 32 26 30    | 88  |
| FBgn0011739 | <b>wts</b> | FBgn0003721 | <b>Tm1</b>         | <b>0</b>    | 33 28 27    | 88  |
| FBgn0011739 | <b>wts</b> | FBgn0261710 | <b>nocte</b>       | <b>0</b>    | 22 24 25    | 71  |
| FBgn0011739 | <b>wts</b> | FBgn0001218 | <b>Hsc70-3</b>     | <b>0</b>    | 20 21 27    | 68  |
| FBgn0011739 | <b>wts</b> | FBgn0030699 | <b>CG8578</b>      | <b>0</b>    | 21 22 22    | 65  |
| FBgn0011739 | <b>wts</b> | FBgn0250789 | <b>alpha-Spec</b>  | <b>0</b>    | 20 13 19    | 52  |
| FBgn0011739 | <b>wts</b> | FBgn0001233 | <b>Hsp83</b>       | <b>0</b>    | 16 13 17    | 46  |
| FBgn0011739 | <b>wts</b> | FBgn0263231 | <b>bel</b>         | <b>0</b>    | 12 17 17    | 46  |
| FBgn0011739 | <b>wts</b> | FBgn0002622 | <b>RpS3</b>        | <b>0</b>    | 14 11 13    | 38  |
| FBgn0011739 | <b>wts</b> | FBgn0003360 | <b>sesB</b>        | <b>0</b>    | 11 9 13     | 33  |
| FBgn0011739 | <b>wts</b> | FBgn0039757 | <b>RpS7</b>        | <b>0</b>    | 10 9 13     | 32  |
| FBgn0011739 | <b>wts</b> | FBgn0004687 | <b>Mlc-c</b>       | <b>0</b>    | 11 11 9     | 31  |
| FBgn0011739 | <b>wts</b> | FBgn0034577 | <b>cpa</b>         | <b>0</b>    | 11 11 9     | 31  |
| FBgn0011739 | <b>wts</b> | FBgn0029176 | <b>Ef1gamma</b>    | <b>0</b>    | 10 8 8      | 26  |
| FBgn0011739 | <b>wts</b> | FBgn0037891 | <b>CG5214</b>      | <b>0</b>    | 7 7 12      | 26  |
| FBgn0011739 | <b>wts</b> | FBgn0035499 | <b>Chd64</b>       | <b>0</b>    | 9 8 9       | 26  |
| FBgn0011739 | <b>wts</b> | FBgn0001220 | <b>Hsc70-5</b>     | <b>0</b>    | 7 8 10      | 25  |
| FBgn0011739 | <b>wts</b> | FBgn0031256 | <b>CG4164</b>      | <b>0</b>    | 6 7 9       | 22  |
| FBgn0011739 | <b>wts</b> | FBgn0262734 | <b>Rbp2</b>        | <b>0</b>    | 6 6 9       | 21  |
| FBgn0011739 | <b>wts</b> | FBgn0035608 | <b>blanks</b>      | <b>0</b>    | 6 7 7       | 20  |
| FBgn0011739 | <b>wts</b> | FBgn0032859 | <b>Arc-p34</b>     | <b>0</b>    | 10 6 4      | 20  |
| FBgn0011739 | <b>wts</b> | FBgn0011570 | <b>cpb</b>         | <b>0</b>    | 8 7 5       | 20  |
| FBgn0011739 | <b>wts</b> | FBgn0040227 | <b>eIF-3p66</b>    | <b>0</b>    | 6 5 7       | 18  |
| FBgn0011739 | <b>wts</b> | FBgn0015778 | <b>rin</b>         | <b>0</b>    | 5 6 6       | 17  |
| FBgn0011739 | <b>wts</b> | FBgn0000044 | <b>Act57B</b>      | <b>0</b>    | 7 5 5       | 17  |
| FBgn0011739 | <b>wts</b> | FBgn0011211 | <b>blw</b>         | <b>0</b>    | 4 6 6       | 16  |
| FBgn0011739 | <b>wts</b> | FBgn0004403 | <b>RpS14a</b>      | <b>0</b>    | 5 6 5       | 16  |
| FBgn0011739 | <b>wts</b> | FBgn0001216 | <b>Hsc70-1</b>     | <b>0</b>    | 6 5 5       | 16  |
| FBgn0011739 | <b>wts</b> | FBgn0002780 | <b>mod</b>         | <b>0</b>    | 5 6 4       | 15  |
| FBgn0011739 | <b>wts</b> | FBgn0002645 | <b>Map205</b>      | <b>0</b>    | 4 3 8       | 15  |
| FBgn0011739 | <b>wts</b> | FBgn0003022 | <b>Ote</b>         | <b>0</b>    | 5 3 7       | 15  |
| FBgn0011739 | <b>wts</b> | FBgn0010217 | <b>ATPsyn-beta</b> | <b>0</b>    | 4 4 6       | 14  |
| FBgn0011739 | <b>wts</b> | FBgn0004888 | <b>Scsalpha</b>    | <b>0</b>    | 4 4 5       | 13  |
| FBgn0011739 | <b>wts</b> | FBgn0000258 | <b>Ckllalpha</b>   | <b>0</b>    | 5 4 4       | 13  |
| FBgn0011739 | <b>wts</b> | FBgn0261593 | <b>RpS10b</b>      | <b>0</b>    | 4 5 3       | 12  |
| FBgn0011739 | <b>wts</b> | FBgn0015834 | <b>Trip1</b>       | <b>0</b>    | 3 4 5       | 12  |
| FBgn0011739 | <b>wts</b> | FBgn0001961 | <b>Sop2</b>        | <b>0</b>    | 6 3 3       | 12  |
| FBgn0011739 | <b>wts</b> | FBgn0010198 | <b>RpS15Aa</b>     | <b>0</b>    | 4 4 4       | 12  |
| FBgn0011739 | <b>wts</b> | FBgn0036213 | <b>RpL10Ab</b>     | <b>0</b>    | 3 3 6       | 12  |
| FBgn0011739 | <b>wts</b> | FBgn0027932 | <b>Akap200</b>     | <b>0</b>    | 3 3 6       | 12  |
| FBgn0011739 | <b>wts</b> | FBgn0003890 | <b>betaTub97EF</b> | <b>0</b>    | 4 4 3       | 11  |
| FBgn0011739 | <b>wts</b> | FBgn0042134 | <b>Capr</b>        | <b>0</b>    | 3 2 6       | 11  |

## (A) entire PPIN

|             |            |             |                    |         |    |
|-------------|------------|-------------|--------------------|---------|----|
| FBgn0011739 | <b>wts</b> | FBgn0027066 | <b>Eb1</b>         | 0 3 3 5 | 11 |
| FBgn0011739 | <b>wts</b> | FBgn0004237 | <b>Hrb87F</b>      | 0 3 3 5 | 11 |
| FBgn0011739 | <b>wts</b> | FBgn0029979 | <b>CG10777</b>     | 0 3 4 3 | 10 |
| FBgn0011739 | <b>wts</b> | FBgn0004363 | <b>porin</b>       | 0 3 4 3 | 10 |
| FBgn0011739 | <b>wts</b> | FBgn0003941 | <b>RpL40</b>       | 0 3 3 4 | 10 |
| FBgn0011739 | <b>wts</b> | FBgn0051363 | <b>Jupiter</b>     | 0 2 3 4 | 9  |
| FBgn0011739 | <b>wts</b> | FBgn0039697 | <b>CG7834</b>      | 0 3 2 4 | 9  |
| FBgn0011739 | <b>wts</b> | FBgn0000100 | <b>RpLP0</b>       | 0 1 3 5 | 9  |
| FBgn0011739 | <b>wts</b> | FBgn0011710 | <b>Sep1</b>        | 0 3 4 2 | 9  |
| FBgn0011739 | <b>wts</b> | FBgn0004867 | <b>RpS2</b>        | 0 3 2 4 | 9  |
| FBgn0011739 | <b>wts</b> | FBgn0031977 | <b>baf</b>         | 0 4 4 1 | 9  |
| FBgn0011739 | <b>wts</b> | FBgn0028737 | <b>Ef1beta</b>     | 0 3 3 2 | 8  |
| FBgn0011739 | <b>wts</b> | FBgn0011692 | <b>pav</b>         | 0 4 4 0 | 8  |
| FBgn0011739 | <b>wts</b> | FBgn0013325 | <b>RpL11</b>       | 0 3 3 2 | 8  |
| FBgn0011739 | <b>wts</b> | FBgn0028327 | <b>I(1)G0320</b>   | 0 2 4 2 | 8  |
| FBgn0011739 | <b>wts</b> | FBgn0000181 | <b>bic</b>         | 0 2 2 3 | 7  |
| FBgn0011739 | <b>wts</b> | FBgn0011742 | <b>Arp14D</b>      | 0 1 3 3 | 7  |
| FBgn0011739 | <b>wts</b> | FBgn0001217 | <b>Hsc70-2</b>     | 0 2 2 2 | 6  |
| FBgn0011739 | <b>wts</b> | FBgn0034968 | <b>RpL12</b>       | 0 2 2 2 | 6  |
| FBgn0011739 | <b>wts</b> | FBgn0037719 | <b>bocksbeutel</b> | 0 2 2 2 | 6  |
| FBgn0011739 | <b>wts</b> | FBgn0000319 | <b>Chc</b>         | 0 2 2 2 | 6  |
| FBgn0011739 | <b>wts</b> | FBgn0015756 | <b>RpL9</b>        | 0 1 3 2 | 6  |
| FBgn0011739 | <b>wts</b> | FBgn0024987 | <b>ssx</b>         | 0 2 2 1 | 5  |
| FBgn0011739 | <b>wts</b> | FBgn0086904 | <b>Nacalpa</b>     | 0 1 2 2 | 5  |
| FBgn0011739 | <b>wts</b> | FBgn0031781 | <b>Arc-p20</b>     | 0 2 1 2 | 5  |
| FBgn0011739 | <b>wts</b> | FBgn0013726 | <b>pnut</b>        | 0 2 2 1 | 5  |
| FBgn0011739 | <b>wts</b> | FBgn0001215 | <b>Hrb98DE</b>     | 0 3 1 1 | 5  |
| FBgn0011739 | <b>wts</b> | FBgn0020279 | <b>lig</b>         | 0 0 0 4 | 4  |
| FBgn0011739 | <b>wts</b> | FBgn0013981 | <b>His4r</b>       | 0 1 1 2 | 4  |
| FBgn0011739 | <b>wts</b> | FBgn0014269 | <b>prod</b>        | 0 3 1 0 | 4  |
| FBgn0011739 | <b>wts</b> | FBgn0031030 | <b>Tao-1</b>       | 0 1 1 1 | 3  |
| FBgn0011739 | <b>wts</b> | FBgn0022023 | <b>elF-3p40</b>    | 0 1 1 1 | 3  |
| FBgn0011739 | <b>wts</b> | FBgn0010348 | <b>Arf79F</b>      | 0 1 1 1 | 3  |
| FBgn0011739 | <b>wts</b> | FBgn0000559 | <b>Ef2b</b>        | 0 0 2 1 | 3  |
| FBgn0011739 | <b>wts</b> | FBgn0263121 | <b>Prosalpa1</b>   | 0 1 1 1 | 3  |
| FBgn0011739 | <b>wts</b> | FBgn0028470 | <b>Patr-1</b>      | 0 1 1 1 | 3  |
| FBgn0011739 | <b>wts</b> | FBgn0039562 | <b>Gp93</b>        | 0 1 1 1 | 3  |
| FBgn0011739 | <b>wts</b> | FBgn0050122 | <b>CG30122</b>     | 0 1 2 0 | 3  |
| FBgn0011739 | <b>wts</b> | FBgn0260944 | <b>Rbp1</b>        | 0 1 1 1 | 3  |
| FBgn0011739 | <b>wts</b> | FBgn0005278 | <b>Sam-S</b>       | 0 1 1 1 | 3  |
| FBgn0011739 | <b>wts</b> | FBgn0025637 | <b>skpA</b>        | 0 1 1 1 | 3  |
| FBgn0011739 | <b>wts</b> | FBgn0027598 | <b>cindr</b>       | 0 1 1 1 | 3  |
| FBgn0011739 | <b>wts</b> | FBgn0038224 | <b>CG3321</b>      | 0 1 1 1 | 3  |
| FBgn0011739 | <b>wts</b> | FBgn0026562 | <b>BM-40-SPARC</b> | 0 1 1 1 | 3  |
| FBgn0011739 | <b>wts</b> | FBgn0026761 | <b>Trap1</b>       | 0 1 1 1 | 3  |
| FBgn0011739 | <b>wts</b> | FBgn0052479 | <b>CG32479</b>     | 0 1 1 1 | 3  |
| FBgn0011739 | <b>wts</b> | FBgn0262125 | <b>sec23</b>       | 0 1 1 1 | 3  |
| FBgn0011739 | <b>wts</b> | FBgn0014391 | <b>sun</b>         | 0 1 1 1 | 3  |
| FBgn0011739 | <b>wts</b> | FBgn0025457 | <b>Bub3</b>        | 0 1 1 1 | 3  |
| FBgn0011739 | <b>wts</b> | FBgn0035424 | <b>CG11505</b>     | 0 1 1 1 | 3  |
| FBgn0011739 | <b>wts</b> | FBgn0037137 | <b>Nopp140</b>     | 0 1 1 1 | 3  |

## (A) entire PPIN

|                        |                               |         |   |
|------------------------|-------------------------------|---------|---|
| FBgn0011739 <b>wts</b> | FBgn0262601 <b>SmB</b>        | 0 1 1 1 | 3 |
| FBgn0011739 <b>wts</b> | FBgn0261385 <b>scra</b>       | 0 1 1 1 | 3 |
| FBgn0011739 <b>wts</b> | FBgn0014029 <b>Sep2</b>       | 0 1 1 1 | 3 |
| FBgn0011739 <b>wts</b> | FBgn0001315 <b>kl-5</b>       | 0 1 1 1 | 3 |
| FBgn0011739 <b>wts</b> | FBgn0003274 <b>RpLP2</b>      | 0 1 1 1 | 3 |
| FBgn0011739 <b>wts</b> | FBgn0005640 <b>Eip63E</b>     | 0 1 1 1 | 3 |
| FBgn0011739 <b>wts</b> | FBgn0024238 <b>Fim</b>        | 0 1 1 1 | 3 |
| FBgn0011739 <b>wts</b> | FBgn0034398 <b>CG15098</b>    | 0 1 1 1 | 3 |
| FBgn0011739 <b>wts</b> | FBgn0021906 <b>RFeSP</b>      | 0 1 0 1 | 2 |
| FBgn0011739 <b>wts</b> | FBgn0261792 <b>snRNP-U1-C</b> | 0 0 1 1 | 2 |
| FBgn0011739 <b>wts</b> | FBgn0015929 <b>dpa</b>        | 0 1 1 0 | 2 |
| FBgn0011739 <b>wts</b> | FBgn0030992 <b>CG33253</b>    | 0 1 0 1 | 2 |
| FBgn0011739 <b>wts</b> | FBgn0015589 <b>Apc</b>        | 0 1 0 1 | 2 |
| FBgn0011739 <b>wts</b> | FBgn0004556 <b>Dbp73D</b>     | 0 0 1 1 | 2 |
| FBgn0011739 <b>wts</b> | FBgn0037551 <b>Gie</b>        | 0 1 1 0 | 2 |
| FBgn0011739 <b>wts</b> | FBgn0037632 <b>Tcp-1eta</b>   | 0 1 0 1 | 2 |
| FBgn0011739 <b>wts</b> | FBgn0002031 <b>I(2)37Cc</b>   | 0 1 0 1 | 2 |
| FBgn0011739 <b>wts</b> | FBgn0005586 <b>Rab3</b>       | 0 1 1 0 | 2 |
| FBgn0011739 <b>wts</b> | FBgn0015245 <b>Hsp60</b>      | 0 1 1 0 | 2 |
| FBgn0011739 <b>wts</b> | FBgn0027494 <b>RpS10a</b>     | 0 1 1 0 | 2 |
| FBgn0011739 <b>wts</b> | FBgn0031868 <b>Rat1</b>       | 0 0 1 1 | 2 |
| FBgn0011739 <b>wts</b> | FBgn0030322 <b>CG15220</b>    | 0 1 0 1 | 2 |
| FBgn0011739 <b>wts</b> | FBgn0037270 <b>CG9769</b>     | 0 0 1 1 | 2 |
| FBgn0011739 <b>wts</b> | FBgn0010551 <b>I(2)03709</b>  | 0 0 1 1 | 2 |
| FBgn0011739 <b>wts</b> | FBgn0260441 <b>RpS12</b>      | 0 1 0 1 | 2 |
| FBgn0011739 <b>wts</b> | FBgn0011571 <b>caz</b>        | 0 0 1 1 | 2 |
| FBgn0011739 <b>wts</b> | FBgn0010621 <b>Cct5</b>       | 0 0 1 1 | 2 |
| FBgn0011739 <b>wts</b> | FBgn0028692 <b>Rpn2</b>       | 0 0 1 1 | 2 |
| FBgn0011739 <b>wts</b> | FBgn0005648 <b>Pabp2</b>      | 0 1 1 0 | 2 |
| FBgn0011739 <b>wts</b> | FBgn0015283 <b>Pros54</b>     | 0 1 1 0 | 2 |
| FBgn0011739 <b>wts</b> | FBgn0033264 <b>Nup50</b>      | 0 0 1 1 | 2 |
| FBgn0011739 <b>wts</b> | FBgn0033342 <b>CG8258</b>     | 0 0 1 1 | 2 |
| FBgn0011739 <b>wts</b> | FBgn0015019 <b>Cctgamma</b>   | 0 1 1 0 | 2 |
| FBgn0011739 <b>wts</b> | FBgn0037249 <b>eIF3-S10</b>   | 0 0 1 1 | 2 |
| FBgn0011739 <b>wts</b> | FBgn0015288 <b>RpL22</b>      | 0 1 1 0 | 2 |
| FBgn0011739 <b>wts</b> | FBgn0058042 <b>CG40042</b>    | 0 0 1 1 | 2 |
| FBgn0011739 <b>wts</b> | FBgn0001092 <b>Gapdh2</b>     | 0 0 1 1 | 2 |
| FBgn0011739 <b>wts</b> | FBgn0035872 <b>CG7185</b>     | 0 1 1 0 | 2 |
| FBgn0011739 <b>wts</b> | FBgn0035229 <b>CG7852</b>     | 0 0 1 1 | 2 |
| FBgn0011739 <b>wts</b> | FBgn0032600 <b>CG17912</b>    | 0 0 1 1 | 2 |
| FBgn0011739 <b>wts</b> | FBgn0032987 <b>RpL21</b>      | 0 1 1 0 | 2 |
| FBgn0011739 <b>wts</b> | FBgn0038853 <b>RhoGAP93B</b>  | 0 0 1 1 | 2 |
| FBgn0011739 <b>wts</b> | FBgn0003449 <b>snf</b>        | 0 1 1 0 | 2 |
| FBgn0011739 <b>wts</b> | FBgn0037756 <b>CG8507</b>     | 0 0 1 1 | 2 |
| FBgn0011739 <b>wts</b> | FBgn0086356 <b>tum</b>        | 0 1 1 0 | 2 |
| FBgn0011739 <b>wts</b> | FBgn0027571 <b>CG3523</b>     | 0 1 1 0 | 2 |
| FBgn0011739 <b>wts</b> | FBgn0032217 <b>CG4972</b>     | 0 0 1 1 | 2 |
| FBgn0011739 <b>wts</b> | FBgn0035753 <b>RpL18</b>      | 0 1 1 0 | 2 |
| FBgn0011739 <b>wts</b> | FBgn0037376 <b>CG2051</b>     | 0 1 1 0 | 2 |
| FBgn0011739 <b>wts</b> | FBgn0026372 <b>RpL23A</b>     | 0 1 1 0 | 2 |
| FBgn0011739 <b>wts</b> | FBgn0034401 <b>CG15100</b>    | 0 1 0 0 | 1 |

## (A) entire PPIN

|             |            |             |                 |   |       |   |
|-------------|------------|-------------|-----------------|---|-------|---|
| FBgn0011739 | <b>wts</b> | FBgn0035589 | <b>CHMP2B</b>   | 0 | 1 0 0 | 1 |
| FBgn0011739 | <b>wts</b> | FBgn0031857 | <b>CG11321</b>  | 0 | 0 0 1 | 1 |
| FBgn0011739 | <b>wts</b> | FBgn0035704 | <b>CG10144</b>  | 0 | 1 0 0 | 1 |
| FBgn0011739 | <b>wts</b> | FBgn0033051 | <b>dream</b>    | 0 | 0 0 1 | 1 |
| FBgn0011739 | <b>wts</b> | FBgn0034138 | <b>RpS15</b>    | 0 | 0 1 0 | 1 |
| FBgn0011739 | <b>wts</b> | FBgn0037142 | <b>CG14562</b>  | 0 | 0 1 0 | 1 |
| FBgn0011739 | <b>wts</b> | FBgn0039286 | <b>dan</b>      | 0 | 0 1 0 | 1 |
| FBgn0011739 | <b>wts</b> | FBgn0032154 | <b>CG5924</b>   | 0 | 0 1 0 | 1 |
| FBgn0011739 | <b>wts</b> | FBgn0261790 | <b>SmE</b>      | 0 | 0 0 1 | 1 |
| FBgn0011739 | <b>wts</b> | FBgn0261388 | <b>CG42629</b>  | 0 | 1 0 0 | 1 |
| FBgn0011739 | <b>wts</b> | FBgn0033483 | <b>egr</b>      | 0 | 0 1 0 | 1 |
| FBgn0011739 | <b>wts</b> | FBgn0050069 | <b>CG30069</b>  | 0 | 1 0 0 | 1 |
| FBgn0011739 | <b>wts</b> | FBgn0086906 | <b>sls</b>      | 0 | 0 0 1 | 1 |
| FBgn0011739 | <b>wts</b> | FBgn0026418 | <b>Hsc70Cb</b>  | 0 | 1 0 0 | 1 |
| FBgn0011739 | <b>wts</b> | FBgn0010265 | <b>RpS13</b>    | 0 | 0 0 1 | 1 |
| FBgn0011739 | <b>wts</b> | FBgn0033460 | <b>sec24</b>    | 0 | 1 0 0 | 1 |
| FBgn0011739 | <b>wts</b> | FBgn0024733 | <b>RpL10</b>    | 0 | 0 1 0 | 1 |
| FBgn0011739 | <b>wts</b> | FBgn0262515 | <b>VhaAC45</b>  | 0 | 0 0 1 | 1 |
| FBgn0011739 | <b>wts</b> | FBgn0030293 | <b>CG1737</b>   | 0 | 0 1 0 | 1 |
| FBgn0011739 | <b>wts</b> | FBgn0028982 | <b>Spt6</b>     | 0 | 0 0 1 | 1 |
| FBgn0011739 | <b>wts</b> | FBgn0037074 | <b>CG7324</b>   | 0 | 0 1 0 | 1 |
| FBgn0011739 | <b>wts</b> | FBgn0003732 | <b>Top2</b>     | 0 | 0 1 0 | 1 |
| FBgn0011739 | <b>wts</b> | FBgn0261119 | <b>Prp19</b>    | 0 | 0 1 0 | 1 |
| FBgn0011739 | <b>wts</b> | FBgn0027581 | <b>CG6191</b>   | 0 | 1 0 0 | 1 |
| FBgn0011739 | <b>wts</b> | FBgn0031547 | <b>Sr-CIV</b>   | 0 | 0 1 0 | 1 |
| FBgn0011739 | <b>wts</b> | FBgn0002466 | <b>sti</b>      | 0 | 1 0 0 | 1 |
| FBgn0011739 | <b>wts</b> | FBgn0259876 | <b>Cap-G</b>    | 0 | 0 0 1 | 1 |
| FBgn0011739 | <b>wts</b> | FBgn0016976 | <b>stnA</b>     | 0 | 1 0 0 | 1 |
| FBgn0011739 | <b>wts</b> | FBgn0037530 | <b>CG2943</b>   | 0 | 0 1 0 | 1 |
| FBgn0011739 | <b>wts</b> | FBgn0028560 | <b>sut4</b>     | 0 | 1 0 0 | 1 |
| FBgn0011739 | <b>wts</b> | FBgn0086377 | <b>Syx7</b>     | 0 | 0 0 1 | 1 |
| FBgn0011739 | <b>wts</b> | FBgn0261535 | <b>I(2)34Fd</b> | 0 | 1 0 0 | 1 |
| FBgn0011739 | <b>wts</b> | FBgn0028700 | <b>RfC38</b>    | 0 | 0 0 1 | 1 |
| FBgn0011739 | <b>wts</b> | FBgn0031540 | <b>CG3238</b>   | 0 | 0 1 0 | 1 |
| FBgn0011739 | <b>wts</b> | FBgn0085478 | <b>CG34449</b>  | 0 | 0 0 1 | 1 |
| FBgn0011739 | <b>wts</b> | FBgn0053509 | <b>CG33509</b>  | 0 | 1 0 0 | 1 |
| FBgn0011739 | <b>wts</b> | FBgn0037084 | <b>Syx6</b>     | 0 | 1 0 0 | 1 |
| FBgn0011739 | <b>wts</b> | FBgn0036892 | <b>CG8798</b>   | 0 | 0 0 1 | 1 |
| FBgn0011739 | <b>wts</b> | FBgn0033699 | <b>RpS11</b>    | 0 | 0 1 0 | 1 |
| FBgn0011739 | <b>wts</b> | FBgn0051668 | <b>CG31668</b>  | 0 | 0 1 0 | 1 |
| FBgn0011739 | <b>wts</b> | FBgn0027567 | <b>CG8108</b>   | 0 | 1 0 0 | 1 |
| FBgn0011739 | <b>wts</b> | FBgn0014163 | <b>fax</b>      | 0 | 0 1 0 | 1 |
| FBgn0011739 | <b>wts</b> | FBgn0000427 | <b>dec-1</b>    | 0 | 0 1 0 | 1 |
| FBgn0011739 | <b>wts</b> | FBgn0024183 | <b>vig</b>      | 0 | 0 1 0 | 1 |
| FBgn0011739 | <b>wts</b> | FBgn0010412 | <b>RpS19a</b>   | 0 | 0 1 0 | 1 |
| FBgn0011739 | <b>wts</b> | FBgn0263355 | <b>CG31688</b>  | 0 | 0 1 0 | 1 |
| FBgn0011739 | <b>wts</b> | FBgn0032372 | <b>CG4988</b>   | 0 | 1 0 0 | 1 |
| FBgn0011739 | <b>wts</b> | FBgn0002924 | <b>ncd</b>      | 0 | 0 1 0 | 1 |
| FBgn0011739 | <b>wts</b> | FBgn0037807 | <b>CG6293</b>   | 0 | 0 1 0 | 1 |
| FBgn0011739 | <b>wts</b> | FBgn0036511 | <b>CG6498</b>   | 0 | 0 0 1 | 1 |
| FBgn0011739 | <b>wts</b> | FBgn0039229 | <b>Saf-B</b>    | 0 | 0 0 1 | 1 |

## (A) entire PPIN

|             |            |             |                  |         |   |
|-------------|------------|-------------|------------------|---------|---|
| FBgn0011739 | <b>wts</b> | FBgn0039731 | <b>sas-6</b>     | 0 0 0 1 | 1 |
| FBgn0011739 | <b>wts</b> | FBgn0035726 | <b>CG9953</b>    | 0 0 1 0 | 1 |
| FBgn0011739 | <b>wts</b> | FBgn0031216 | <b>CG11376</b>   | 0 1 0 0 | 1 |
| FBgn0011739 | <b>wts</b> | FBgn0023517 | <b>Pgam5</b>     | 0 0 1 0 | 1 |
| FBgn0011739 | <b>wts</b> | FBgn0263347 | <b>Caf1</b>      | 0 0 1 0 | 1 |
| FBgn0011739 | <b>wts</b> | FBgn0023521 | <b>CG3587</b>    | 0 1 0 0 | 1 |
| FBgn0011739 | <b>wts</b> | FBgn0015024 | <b>Cklalpha</b>  | 0 0 1 0 | 1 |
| FBgn0011739 | <b>wts</b> | FBgn0262126 | <b>gho</b>       | 0 1 0 0 | 1 |
| FBgn0011739 | <b>wts</b> | FBgn0038952 | <b>CG7069</b>    | 0 0 1 0 | 1 |
| FBgn0011739 | <b>wts</b> | FBgn0037044 | <b>CG10585</b>   | 0 0 0 1 | 1 |
| FBgn0011739 | <b>wts</b> | FBgn0028954 | <b>CG3287</b>    | 0 1 0 0 | 1 |
| FBgn0011739 | <b>wts</b> | FBgn0086347 | <b>Myo31DF</b>   | 0 1 0 0 | 1 |
| FBgn0011739 | <b>wts</b> | FBgn0032210 | <b>CYLD</b>      | 0 0 1 0 | 1 |
| FBgn0011739 | <b>wts</b> | FBgn0040078 | <b>pont</b>      | 0 0 1 0 | 1 |
| FBgn0011739 | <b>wts</b> | FBgn0037912 | <b>sea</b>       | 0 0 1 0 | 1 |
| FBgn0011739 | <b>wts</b> | FBgn0051370 | <b>CG31370</b>   | 0 0 0 1 | 1 |
| FBgn0011739 | <b>wts</b> | FBgn0031591 | <b>CG15425</b>   | 0 0 1 0 | 1 |
| FBgn0011739 | <b>wts</b> | FBgn0013988 | <b>Strn-Mlck</b> | 0 1 0 0 | 1 |
| FBgn0011739 | <b>wts</b> | FBgn0053680 | <b>CG33680</b>   | 0 0 1 0 | 1 |
| FBgn0011739 | <b>wts</b> | FBgn0000541 | <b>E(bx)</b>     | 0 0 0 1 | 1 |
| FBgn0011739 | <b>wts</b> | FBgn0030000 | <b>CG2260</b>    | 0 1 0 0 | 1 |
| FBgn0011739 | <b>wts</b> | FBgn0039491 | <b>CG6059</b>    | 0 0 1 0 | 1 |
| FBgn0011739 | <b>wts</b> | FBgn0035400 | <b>CG11537</b>   | 0 1 0 0 | 1 |
| FBgn0011739 | <b>wts</b> | FBgn0002638 | <b>Bj1</b>       | 0 0 1 0 | 1 |
| FBgn0011739 | <b>wts</b> | FBgn0032456 | <b>MRP</b>       | 0 0 1 0 | 1 |
| FBgn0011739 | <b>wts</b> | FBgn0039923 | <b>MED26</b>     | 0 0 1 0 | 1 |
| FBgn0011739 | <b>wts</b> | FBgn0039537 | <b>CG5590</b>    | 0 0 0 1 | 1 |
| FBgn0011739 | <b>wts</b> | FBgn0031571 | <b>CG3921</b>    | 0 0 1 0 | 1 |
| FBgn0011739 | <b>wts</b> | FBgn0041706 | <b>CG3253</b>    | 0 1 0 0 | 1 |
| FBgn0011739 | <b>wts</b> | FBgn0034877 | <b>levy</b>      | 0 0 0 1 | 1 |
| FBgn0011739 | <b>wts</b> | FBgn0034646 | <b>Rae1</b>      | 0 0 0 1 | 1 |
| FBgn0011739 | <b>wts</b> | FBgn0038953 | <b>CG18596</b>   | 0 0 1 0 | 1 |
| FBgn0011739 | <b>wts</b> | FBgn0259108 | <b>futsch</b>    | 0 1 0 0 | 1 |
| FBgn0011739 | <b>wts</b> | FBgn0027616 | <b>YT521-B</b>   | 0 0 1 0 | 1 |
| FBgn0011739 | <b>wts</b> | FBgn0002174 | <b>l(2)tid</b>   | 0 0 0 1 | 1 |
| FBgn0011739 | <b>wts</b> | FBgn0035600 | <b>CG4769</b>    | 0 0 1 0 | 1 |
| FBgn0011739 | <b>wts</b> | FBgn0038742 | <b>Arc42</b>     | 0 0 0 1 | 1 |
| FBgn0011739 | <b>wts</b> | FBgn0028325 | <b>l(1)G0334</b> | 0 0 0 1 | 1 |
| FBgn0011739 | <b>wts</b> | FBgn0033482 | <b>CG1371</b>    | 0 0 1 0 | 1 |
| FBgn0011739 | <b>wts</b> | FBgn0024556 | <b>EfTuM</b>     | 0 0 1 0 | 1 |
| FBgn0011739 | <b>wts</b> | FBgn0032518 | <b>RpL24</b>     | 0 0 1 0 | 1 |
| FBgn0011739 | <b>wts</b> | FBgn0031033 | <b>CG14219</b>   | 0 0 1 0 | 1 |
| FBgn0011739 | <b>wts</b> | FBgn0025700 | <b>CG5885</b>    | 0 0 1 0 | 1 |
| FBgn0011739 | <b>wts</b> | FBgn0003089 | <b>pip</b>       | 0 0 1 0 | 1 |
| FBgn0011739 | <b>wts</b> | FBgn0029172 | <b>Fad2</b>      | 0 0 1 0 | 1 |
| FBgn0011739 | <b>wts</b> | FBgn0024326 | <b>Mkk4</b>      | 0 0 0 1 | 1 |
| FBgn0011739 | <b>wts</b> | FBgn0052681 | <b>CG32681</b>   | 0 0 1 0 | 1 |
| FBgn0011739 | <b>wts</b> | FBgn0030412 | <b>tomosyn</b>   | 0 0 1 0 | 1 |
| FBgn0011739 | <b>wts</b> | FBgn0032240 | <b>CG17768</b>   | 0 0 1 0 | 1 |
| FBgn0011739 | <b>wts</b> | FBgn0260399 | <b>gwl</b>       | 0 0 0 1 | 1 |
| FBgn0011739 | <b>wts</b> | FBgn0033351 | <b>CG8235</b>    | 0 0 1 0 | 1 |

## (A) entire PPIN

|             |            |             |                     |               |     |
|-------------|------------|-------------|---------------------|---------------|-----|
| FBgn0011739 | <b>wts</b> | FBgn0034500 | <b>CG11200</b>      | 0 0 1 0       | 1   |
| FBgn0011739 | <b>wts</b> | FBgn0262603 | <b>sec8</b>         | 0 1 0 0       | 1   |
| FBgn0011739 | <b>wts</b> | FBgn0015806 | <b>S6k</b>          | 0 0 1 0       | 1   |
| FBgn0011739 | <b>wts</b> | FBgn0030330 | <b>Tango10</b>      | 0 0 1 0       | 1   |
| FBgn0011739 | <b>wts</b> | FBgn0051773 | <b>CG31773</b>      | 0 0 1 0       | 1   |
| FBgn0011739 | <b>wts</b> | FBgn0032035 | <b>CG13393</b>      | 0 0 0 1       | 1   |
| FBgn0011739 | <b>wts</b> | FBgn0051755 | <b>CG31755</b>      | 0 1 0 0       | 1   |
| FBgn0011739 | <b>wts</b> | FBgn0038499 | <b>Brf</b>          | 0 0 1 0       | 1   |
| FBgn0011739 | <b>wts</b> | FBgn0029932 | <b>CG4607</b>       | 0 0 1 0       | 1   |
| FBgn0011739 | <b>wts</b> | FBgn0062442 | <b>CG1458</b>       | 0 1 0 0       | 1   |
| FBgn0011739 | <b>wts</b> | FBgn0029858 | <b>CG15896</b>      | 0 1 0 0       | 1   |
| FBgn0011739 | <b>wts</b> | FBgn0261597 | <b>RpS26</b>        | 0 0 1 0       | 1   |
| FBgn0011739 | <b>wts</b> | FBgn0039331 | <b>CG11913</b>      | 0 0 1 0       | 1   |
| FBgn0011739 | <b>wts</b> | FBgn0039153 | <b>CG5463</b>       | 0 0 1 0       | 1   |
| FBgn0011739 | <b>wts</b> | FBgn0040286 | <b>SC35</b>         | 0 0 1 0       | 1   |
| FBgn0011739 | <b>wts</b> | FBgn0030479 | <b>Rbp1-like</b>    | 0 0 1 0       | 1   |
| FBgn0011739 | <b>wts</b> | FBgn0045980 | <b>niki</b>         | 0 0 1 0       | 1   |
| FBgn0011739 | <b>wts</b> | FBgn0052365 | <b>CG32365</b>      | 0 1 0 0       | 1   |
| FBgn0011739 | <b>wts</b> | FBgn0034258 | <b>eIF3-S8</b>      | 0 0 0 1       | 1   |
| FBgn0011739 | <b>wts</b> | FBgn0010549 | <b>I(2)03659</b>    | 0 1 0 0       | 1   |
| FBgn0011739 | <b>wts</b> | FBgn0010774 | <b>Aly</b>          | 0 0 1 0       | 1   |
| FBgn0011739 | <b>wts</b> | FBgn0036663 | <b>CG9674</b>       | 0 0 0 1       | 1   |
| FBgn0011739 | <b>wts</b> | FBgn0015591 | <b>Ast</b>          | 0 1 0 0       | 1   |
| FBgn0011739 | <b>wts</b> | FBgn0261608 | <b>RpL37A</b>       | 0 0 1 0       | 1   |
| FBgn0011739 | <b>wts</b> | FBgn0004838 | <b>Hrb27C</b>       | 0 0 0 1       | 1   |
| FBgn0011739 | <b>wts</b> | FBgn0000317 | <b>ck</b>           | 0 1 0 0       | 1   |
| FBgn0011739 | <b>wts</b> | FBgn0034087 | <b>clu</b>          | 0 0 1 0       | 1   |
| FBgn0011739 | <b>wts</b> | FBgn0039055 | <b>Rassf</b>        | 0 0 1 0       | 1   |
| FBgn0011739 | <b>wts</b> | FBgn0032652 | <b>CG6870</b>       | 0 1 0 0       | 1   |
| FBgn0003345 | <b>sd</b>  | FBgn0034970 | <b>yki</b>          | 1 60 53 54    | 167 |
| FBgn0003345 | <b>sd</b>  | FBgn0011739 | <b>wts</b>          | 1 10 9 10     | 29  |
| FBgn0003345 | <b>sd</b>  | FBgn0036373 | <b>CG10741</b>      | 1 8 7 8       | 23  |
| FBgn0003345 | <b>sd</b>  | FBgn0011225 | <b>jar</b>          | 0.82 10 16 12 | 38  |
| FBgn0003345 | <b>sd</b>  | FBgn0013981 | <b>His4r</b>        | 0.74 5 5 5    | 15  |
| FBgn0003345 | <b>sd</b>  | FBgn0040284 | <b>SF2</b>          | 0.71 1 7 6    | 14  |
| FBgn0003345 | <b>sd</b>  | FBgn0029897 | <b>RpL17</b>        | 0.64 2 2 2    | 6   |
| FBgn0003345 | <b>sd</b>  | FBgn0032731 | <b>CG10641</b>      | 0.59 6 9 8    | 23  |
| FBgn0003345 | <b>sd</b>  | FBgn0015288 | <b>RpL22</b>        | 0.58 1 3 2    | 6   |
| FBgn0003345 | <b>sd</b>  | FBgn0261397 | <b>didum</b>        | 0.56 7 13 14  | 34  |
| FBgn0003345 | <b>sd</b>  | FBgn0032906 | <b>RPA2</b>         | 0.53 2 1 2    | 5   |
| FBgn0003345 | <b>sd</b>  | FBgn0038369 | <b>Arpc3A</b>       | 0.46 1 3 2    | 6   |
| FBgn0003345 | <b>sd</b>  | FBgn0053868 | <b>His2B:CG3386</b> | 0.33 2 3 3    | 8   |
| FBgn0003345 | <b>sd</b>  | FBgn0039713 | <b>RpS8</b>         | 0.33 1 3 1    | 5   |
| FBgn0003345 | <b>sd</b>  | FBgn0260944 | <b>Rbp1</b>         | 0.33 0 2 1    | 3   |
| FBgn0003345 | <b>sd</b>  | FBgn0086356 | <b>tum</b>          | 0.29 3 3 3    | 9   |
| FBgn0003345 | <b>sd</b>  | FBgn0261551 | <b>CG42669</b>      | 0.28 0 4 1    | 5   |
| FBgn0003345 | <b>sd</b>  | FBgn0261385 | <b>scra</b>         | 0.27 2 3 2    | 7   |
| FBgn0003345 | <b>sd</b>  | FBgn0014163 | <b>fax</b>          | 0.27 0 1 2    | 3   |
| FBgn0003345 | <b>sd</b>  | FBgn0037643 | <b>skap</b>         | 0.22 2 1 3    | 6   |
| FBgn0003345 | <b>sd</b>  | FBgn0010246 | <b>Myo61F</b>       | 0.21 3 9 6    | 18  |
| FBgn0003345 | <b>sd</b>  | FBgn0262716 | <b>Arp66B</b>       | 0.19 5 6 7    | 18  |

## (A) entire PPIN

|             |    |             |                    |      |             |     |
|-------------|----|-------------|--------------------|------|-------------|-----|
| FBgn0003345 | sd | FBgn0010348 | <b>Arf79F</b>      | 0.18 | 2 2 2       | 6   |
| FBgn0003345 | sd | FBgn0037417 | <b>Osi10</b>       | 0.1  | 0 2 0       | 2   |
| FBgn0003345 | sd | FBgn0027598 | <b>cindr</b>       | 0.08 | 1 1 2       | 4   |
| FBgn0003345 | sd | FBgn0028490 | <b>CG31705</b>     | 0.08 | 2 1 0       | 3   |
| FBgn0003345 | sd | FBgn0263006 | <b>Ca-P60A</b>     | 0.07 | 2 1 0       | 3   |
| FBgn0003345 | sd | FBgn0261929 | <b>CG42796</b>     | 0.07 | 0 0 2       | 2   |
| FBgn0003345 | sd | FBgn0029903 | <b>pod1</b>        | 0.06 | 0 2 0       | 2   |
| FBgn0003345 | sd | FBgn0010411 | <b>RpS18</b>       | 0.04 | 1 2 0       | 3   |
| FBgn0003345 | sd | FBgn0041775 | <b>tral</b>        | 0.03 | 0 0 2       | 2   |
| FBgn0003345 | sd | FBgn0263106 | <b>DnaJ-1</b>      | 0.02 | 2 1 2       | 5   |
| FBgn0003345 | sd | FBgn0086656 | <b>shrb</b>        | 0.02 | 1 1 2       | 4   |
| FBgn0003345 | sd | FBgn0031437 | <b>p16-ARC</b>     | 0.01 | 2 3 3       | 8   |
| FBgn0003345 | sd | FBgn0037719 | <b>bocksbeutel</b> | 0.01 | 3 2 3       | 8   |
| FBgn0003345 | sd | FBgn0030136 | <b>RpS28b</b>      | 0.01 | 2 2 2       | 6   |
| FBgn0003345 | sd | FBgn0010173 | <b>RpA-70</b>      | 0.01 | 0 4 2       | 6   |
| FBgn0003345 | sd | FBgn0025885 | <b>Inos</b>        | 0.01 | 2 2 2       | 6   |
| FBgn0003345 | sd | FBgn0002638 | <b>Bj1</b>         | 0.01 | 1 4 1       | 6   |
| FBgn0003345 | sd | FBgn0015268 | <b>Nap1</b>        | 0.01 | 0 1 2       | 3   |
| FBgn0003345 | sd | FBgn0005634 | <b>zip</b>         | 0    | 221 235 225 | 681 |
| FBgn0003345 | sd | FBgn0000042 | <b>Act5C</b>       | 0    | 31 42 31    | 104 |
| FBgn0003345 | sd | FBgn0001219 | <b>Hsc70-4</b>     | 0    | 32 31 33    | 96  |
| FBgn0003345 | sd | FBgn0000709 | <b>flil</b>        | 0    | 29 35 28    | 92  |
| FBgn0003345 | sd | FBgn0003887 | <b>betaTub56D</b>  | 0    | 26 21 28    | 75  |
| FBgn0003345 | sd | FBgn0001218 | <b>Hsc70-3</b>     | 0    | 26 23 22    | 71  |
| FBgn0003345 | sd | FBgn0003721 | <b>Tm1</b>         | 0    | 21 23 22    | 66  |
| FBgn0003345 | sd | FBgn0003884 | <b>alphaTub84B</b> | 0    | 20 19 18    | 57  |
| FBgn0003345 | sd | FBgn0000556 | <b>Ef1alpha48D</b> | 0    | 19 17 21    | 57  |
| FBgn0003345 | sd | FBgn0030699 | <b>CG8578</b>      | 0    | 17 22 17    | 56  |
| FBgn0003345 | sd | FBgn0001233 | <b>Hsp83</b>       | 0    | 10 15 14    | 39  |
| FBgn0003345 | sd | FBgn0003178 | <b>PyK</b>         | 0    | 11 10 11    | 32  |
| FBgn0003345 | sd | FBgn0034577 | <b>cpa</b>         | 0    | 10 13 9     | 32  |
| FBgn0003345 | sd | FBgn0002525 | <b>Lam</b>         | 0    | 13 9 8      | 30  |
| FBgn0003345 | sd | FBgn0082582 | <b>tmod</b>        | 0    | 9 11 8      | 28  |
| FBgn0003345 | sd | FBgn0004687 | <b>Mlc-c</b>       | 0    | 8 8 11      | 27  |
| FBgn0003345 | sd | FBgn0003514 | <b>sqh</b>         | 0    | 9 8 9       | 26  |
| FBgn0003345 | sd | FBgn0262603 | <b>sec8</b>        | 0    | 11 3 12     | 26  |
| FBgn0003345 | sd | FBgn0003360 | <b>sesB</b>        | 0    | 8 7 10      | 25  |
| FBgn0003345 | sd | FBgn0250789 | <b>alpha-Spec</b>  | 0    | 5 10 8      | 23  |
| FBgn0003345 | sd | FBgn0035499 | <b>Chd64</b>       | 0    | 8 6 8       | 22  |
| FBgn0003345 | sd | FBgn0000044 | <b>Act57B</b>      | 0    | 6 7 6       | 19  |
| FBgn0003345 | sd | FBgn0032859 | <b>Arc-p34</b>     | 0    | 3 9 4       | 16  |
| FBgn0003345 | sd | FBgn0011570 | <b>cpb</b>         | 0    | 4 7 5       | 16  |
| FBgn0003345 | sd | FBgn0001216 | <b>Hsc70-1</b>     | 0    | 5 4 5       | 14  |
| FBgn0003345 | sd | FBgn0262734 | <b>Rbp2</b>        | 0    | 6 5 2       | 13  |
| FBgn0003345 | sd | FBgn0041180 | <b>TepIV</b>       | 0    | 4 3 5       | 12  |
| FBgn0003345 | sd | FBgn0261710 | <b>nocte</b>       | 0    | 3 3 6       | 12  |
| FBgn0003345 | sd | FBgn0003732 | <b>Top2</b>        | 0    | 2 7 2       | 11  |
| FBgn0003345 | sd | FBgn0003676 | <b>T-cp1</b>       | 0    | 4 3 4       | 11  |
| FBgn0003345 | sd | FBgn0001961 | <b>Sop2</b>        | 0    | 3 4 4       | 11  |
| FBgn0003345 | sd | FBgn0003888 | <b>betaTub60D</b>  | 0    | 2 4 4       | 10  |
| FBgn0003345 | sd | FBgn0011284 | <b>RpS4</b>        | 0    | 4 3 3       | 10  |



## (A) entire PPIN

|             |    |             |                    |   |       |    |
|-------------|----|-------------|--------------------|---|-------|----|
| FBgn0003345 | sd | FBgn0034743 | <b>RpS16</b>       | 0 | 5 1 4 | 10 |
| FBgn0003345 | sd | FBgn0039757 | <b>RpS7</b>        | 0 | 1 4 5 | 10 |
| FBgn0003345 | sd | FBgn0038145 | <b>Droj2</b>       | 0 | 3 2 5 | 10 |
| FBgn0003345 | sd | FBgn0263231 | <b>bel</b>         | 0 | 3 6 1 | 10 |
| FBgn0003345 | sd | FBgn0001942 | <b>eIF-4a</b>      | 0 | 5 3 2 | 10 |
| FBgn0003345 | sd | FBgn0011742 | <b>Arp14D</b>      | 0 | 3 3 3 | 9  |
| FBgn0003345 | sd | FBgn0015778 | <b>rin</b>         | 0 | 3 3 3 | 9  |
| FBgn0003345 | sd | FBgn0002780 | <b>mod</b>         | 0 | 2 4 3 | 9  |
| FBgn0003345 | sd | FBgn0010198 | <b>RpS15Aa</b>     | 0 | 3 3 3 | 9  |
| FBgn0003345 | sd | FBgn0004403 | <b>RpS14a</b>      | 0 | 2 3 4 | 9  |
| FBgn0003345 | sd | FBgn0003261 | <b>Rm62</b>        | 0 | 1 6 2 | 9  |
| FBgn0003345 | sd | FBgn0053303 | <b>CG33303</b>     | 0 | 3 3 2 | 8  |
| FBgn0003345 | sd | FBgn0003890 | <b>betaTub97EF</b> | 0 | 3 2 3 | 8  |
| FBgn0003345 | sd | FBgn0027066 | <b>Eb1</b>         | 0 | 3 1 4 | 8  |
| FBgn0003345 | sd | FBgn0010078 | <b>RpL23</b>       | 0 | 2 3 3 | 8  |
| FBgn0003345 | sd | FBgn0027932 | <b>Akap200</b>     | 0 | 3 3 2 | 8  |
| FBgn0003345 | sd | FBgn0039300 | <b>RpS27</b>       | 0 | 3 2 2 | 7  |
| FBgn0003345 | sd | FBgn0003941 | <b>RpL40</b>       | 0 | 2 3 2 | 7  |
| FBgn0003345 | sd | FBgn0001215 | <b>Hrb98DE</b>     | 0 | 1 3 3 | 7  |
| FBgn0003345 | sd | FBgn0025286 | <b>RpL31</b>       | 0 | 2 2 2 | 6  |
| FBgn0003345 | sd | FBgn0029176 | <b>Ef1gamma</b>    | 0 | 2 1 3 | 6  |
| FBgn0003345 | sd | FBgn0011692 | <b>pav</b>         | 0 | 1 3 2 | 6  |
| FBgn0003345 | sd | FBgn0001217 | <b>Hsc70-2</b>     | 0 | 2 2 2 | 6  |
| FBgn0003345 | sd | FBgn0001220 | <b>Hsc70-5</b>     | 0 | 3 1 2 | 6  |
| FBgn0003345 | sd | FBgn0015756 | <b>RpL9</b>        | 0 | 1 2 3 | 6  |
| FBgn0003345 | sd | FBgn0003022 | <b>Ote</b>         | 0 | 2 3 1 | 6  |
| FBgn0003345 | sd | FBgn0000253 | <b>Cam</b>         | 0 | 2 2 2 | 6  |
| FBgn0003345 | sd | FBgn0051363 | <b>Jupiter</b>     | 0 | 1 2 2 | 5  |
| FBgn0003345 | sd | FBgn0030993 | <b>Mec2</b>        | 0 | 2 1 2 | 5  |
| FBgn0003345 | sd | FBgn0031781 | <b>Arc-p20</b>     | 0 | 2 1 2 | 5  |
| FBgn0003345 | sd | FBgn0004867 | <b>RpS2</b>        | 0 | 3 2 0 | 5  |
| FBgn0003345 | sd | FBgn0031977 | <b>baf</b>         | 0 | 2 1 2 | 5  |
| FBgn0003345 | sd | FBgn0002622 | <b>RpS3</b>        | 0 | 3 1 1 | 5  |
| FBgn0003345 | sd | FBgn0035608 | <b>blanks</b>      | 0 | 2 1 1 | 4  |
| FBgn0003345 | sd | FBgn0020279 | <b>lig</b>         | 0 | 1 1 2 | 4  |
| FBgn0003345 | sd | FBgn0000559 | <b>Ef2b</b>        | 0 | 0 2 2 | 4  |
| FBgn0003345 | sd | FBgn0017545 | <b>RpS3A</b>       | 0 | 1 2 1 | 4  |
| FBgn0003345 | sd | FBgn0263391 | <b>hts</b>         | 0 | 1 1 2 | 4  |
| FBgn0003345 | sd | FBgn0004167 | <b>kst</b>         | 0 | 1 1 2 | 4  |
| FBgn0003345 | sd | FBgn0036213 | <b>RpL10Ab</b>     | 0 | 1 2 1 | 4  |
| FBgn0003345 | sd | FBgn0033740 | <b>dgt5</b>        | 0 | 2 1 1 | 4  |
| FBgn0003345 | sd | FBgn0261609 | <b>eIF-2alpha</b>  | 0 | 1 2 1 | 4  |
| FBgn0003345 | sd | FBgn0027329 | <b>Tcp-1zeta</b>   | 0 | 2 1 1 | 4  |
| FBgn0003345 | sd | FBgn0002645 | <b>Map205</b>      | 0 | 2 1 1 | 4  |
| FBgn0003345 | sd | FBgn0040227 | <b>eIF-3p66</b>    | 0 | 1 2 1 | 4  |
| FBgn0003345 | sd | FBgn0004237 | <b>Hrb87F</b>      | 0 | 1 1 2 | 4  |
| FBgn0003345 | sd | FBgn0261593 | <b>RpS10b</b>      | 0 | 1 1 1 | 3  |
| FBgn0003345 | sd | FBgn0030992 | <b>CG33253</b>     | 0 | 1 1 1 | 3  |
| FBgn0003345 | sd | FBgn0083961 | <b>CG34125</b>     | 0 | 1 1 1 | 3  |
| FBgn0003345 | sd | FBgn0261596 | <b>RpS24</b>       | 0 | 1 1 1 | 3  |
| FBgn0003345 | sd | FBgn0005586 | <b>Rab3</b>        | 0 | 1 1 1 | 3  |

## (A) entire PPIN

|             |           |             |                   |         |   |
|-------------|-----------|-------------|-------------------|---------|---|
| FBgn0003345 | <b>sd</b> | FBgn0033890 | <b>Ctf4</b>       | 0 1 1 1 | 3 |
| FBgn0003345 | <b>sd</b> | FBgn0033844 | <b>bbc</b>        | 0 1 1 1 | 3 |
| FBgn0003345 | <b>sd</b> | FBgn0039562 | <b>Gp93</b>       | 0 1 1 1 | 3 |
| FBgn0003345 | <b>sd</b> | FBgn0004907 | <b>14-3-3zeta</b> | 0 1 1 1 | 3 |
| FBgn0003345 | <b>sd</b> | FBgn0024987 | <b>ssx</b>        | 0 1 1 1 | 3 |
| FBgn0003345 | <b>sd</b> | FBgn0001197 | <b>His2Av</b>     | 0 1 1 1 | 3 |
| FBgn0003345 | <b>sd</b> | FBgn0026761 | <b>Trap1</b>      | 0 1 1 1 | 3 |
| FBgn0003345 | <b>sd</b> | FBgn0011640 | <b>lark</b>       | 0 1 1 1 | 3 |
| FBgn0003345 | <b>sd</b> | FBgn0028734 | <b>Fmr1</b>       | 0 0 1 2 | 3 |
| FBgn0003345 | <b>sd</b> | FBgn0020910 | <b>RpL3</b>       | 0 1 1 1 | 3 |
| FBgn0003345 | <b>sd</b> | FBgn0029093 | <b>cathD</b>      | 0 1 1 1 | 3 |
| FBgn0003345 | <b>sd</b> | FBgn0031256 | <b>CG4164</b>     | 0 1 0 2 | 3 |
| FBgn0003345 | <b>sd</b> | FBgn0010408 | <b>RpS9</b>       | 0 1 1 1 | 3 |
| FBgn0003345 | <b>sd</b> | FBgn0250814 | <b>CG4169</b>     | 0 2 1 0 | 3 |
| FBgn0003345 | <b>sd</b> | FBgn0011211 | <b>blw</b>        | 0 2 1 0 | 3 |
| FBgn0003345 | <b>sd</b> | FBgn0005533 | <b>RpS17</b>      | 0 1 1 1 | 3 |
| FBgn0003345 | <b>sd</b> | FBgn0032393 | <b>CG12264</b>    | 0 1 1 1 | 3 |
| FBgn0003345 | <b>sd</b> | FBgn0029979 | <b>CG10777</b>    | 0 1 1 1 | 3 |
| FBgn0003345 | <b>sd</b> | FBgn0011710 | <b>Sep1</b>       | 0 2 1 0 | 3 |
| FBgn0003345 | <b>sd</b> | FBgn0033204 | <b>CG2065</b>     | 0 1 1 1 | 3 |
| FBgn0003345 | <b>sd</b> | FBgn0015797 | <b>Rab6</b>       | 0 1 1 1 | 3 |
| FBgn0003345 | <b>sd</b> | FBgn0013325 | <b>RpL11</b>      | 0 1 1 1 | 3 |
| FBgn0003345 | <b>sd</b> | FBgn0040286 | <b>SC35</b>       | 0 1 1 1 | 3 |
| FBgn0003345 | <b>sd</b> | FBgn0261619 | <b>pAbp</b>       | 0 0 2 1 | 3 |
| FBgn0003345 | <b>sd</b> | FBgn0000319 | <b>Chc</b>        | 0 0 2 1 | 3 |
| FBgn0003345 | <b>sd</b> | FBgn0038247 | <b>Cad88C</b>     | 0 0 1 1 | 2 |
| FBgn0003345 | <b>sd</b> | FBgn0014189 | <b>Hel25E</b>     | 0 0 1 1 | 2 |
| FBgn0003345 | <b>sd</b> | FBgn0016726 | <b>RpL29</b>      | 0 1 0 1 | 2 |
| FBgn0003345 | <b>sd</b> | FBgn0028737 | <b>Ef1beta</b>    | 0 1 0 1 | 2 |
| FBgn0003345 | <b>sd</b> | FBgn0263396 | <b>sqd</b>        | 0 0 2 0 | 2 |
| FBgn0003345 | <b>sd</b> | FBgn0261606 | <b>RpL27A</b>     | 0 0 1 1 | 2 |
| FBgn0003345 | <b>sd</b> | FBgn0037607 | <b>CG8036</b>     | 0 1 1 0 | 2 |
| FBgn0003345 | <b>sd</b> | FBgn0030322 | <b>CG15220</b>    | 0 0 1 1 | 2 |
| FBgn0003345 | <b>sd</b> | FBgn0037046 | <b>CG10581</b>    | 0 0 1 1 | 2 |
| FBgn0003345 | <b>sd</b> | FBgn0029118 | <b>Sucb</b>       | 0 1 1 0 | 2 |
| FBgn0003345 | <b>sd</b> | FBgn0015905 | <b>ast</b>        | 0 0 1 1 | 2 |
| FBgn0003345 | <b>sd</b> | FBgn0004432 | <b>Cyp1</b>       | 0 0 1 1 | 2 |
| FBgn0003345 | <b>sd</b> | FBgn0023521 | <b>CG3587</b>     | 0 0 1 1 | 2 |
| FBgn0003345 | <b>sd</b> | FBgn0028687 | <b>Rpt1</b>       | 0 1 0 1 | 2 |
| FBgn0003345 | <b>sd</b> | FBgn0086904 | <b>Nacalalpha</b> | 0 0 1 1 | 2 |
| FBgn0003345 | <b>sd</b> | FBgn0000100 | <b>RpLP0</b>      | 0 0 1 1 | 2 |
| FBgn0003345 | <b>sd</b> | FBgn0004828 | <b>His3.3B</b>    | 0 1 0 1 | 2 |
| FBgn0003345 | <b>sd</b> | FBgn0262601 | <b>SmB</b>        | 0 0 1 1 | 2 |
| FBgn0003345 | <b>sd</b> | FBgn0022774 | <b>Oat</b>        | 0 0 1 1 | 2 |
| FBgn0003345 | <b>sd</b> | FBgn0002579 | <b>RpL36</b>      | 0 1 1 0 | 2 |
| FBgn0003345 | <b>sd</b> | FBgn0004363 | <b>porin</b>      | 0 1 1 0 | 2 |
| FBgn0003345 | <b>sd</b> | FBgn0030479 | <b>Rbp1-like</b>  | 0 0 1 1 | 2 |
| FBgn0003345 | <b>sd</b> | FBgn0020255 | <b>ran</b>        | 0 1 1 0 | 2 |
| FBgn0003345 | <b>sd</b> | FBgn0028969 | <b>deltaCOP</b>   | 0 0 1 1 | 2 |
| FBgn0003345 | <b>sd</b> | FBgn0032482 | <b>Pect</b>       | 0 0 0 1 | 1 |
| FBgn0003345 | <b>sd</b> | FBgn0001330 | <b>kz</b>         | 0 0 1 0 | 1 |

## (A) entire PPIN

|             |    |             |               |   |       |   |
|-------------|----|-------------|---------------|---|-------|---|
| FBgn0003345 | sd | FBgn0263510 | nclb          | 0 | 0 1 0 | 1 |
| FBgn0003345 | sd | FBgn0051344 | CG31344       | 0 | 0 0 1 | 1 |
| FBgn0003345 | sd | FBgn0000412 | D1            | 0 | 0 1 0 | 1 |
| FBgn0003345 | sd | FBgn0038766 | CG4854        | 0 | 0 0 1 | 1 |
| FBgn0003345 | sd | FBgn0040022 | CG40351       | 0 | 1 0 0 | 1 |
| FBgn0003345 | sd | FBgn0052580 | Muc14A        | 0 | 0 1 0 | 1 |
| FBgn0003345 | sd | FBgn0035987 | CG3689        | 0 | 1 0 0 | 1 |
| FBgn0003345 | sd | FBgn0023512 | eIF2B-epsilon | 0 | 0 0 1 | 1 |
| FBgn0003345 | sd | FBgn0262735 | Imp           | 0 | 0 0 1 | 1 |
| FBgn0003345 | sd | FBgn0002466 | sti           | 0 | 0 0 1 | 1 |
| FBgn0003345 | sd | FBgn0039487 | gb            | 0 | 0 1 0 | 1 |
| FBgn0003345 | sd | FBgn0260462 | CG12163       | 0 | 0 0 1 | 1 |
| FBgn0003345 | sd | FBgn0039594 | CG9990        | 0 | 0 0 1 | 1 |
| FBgn0003345 | sd | FBgn0027088 | Aats-gly      | 0 | 0 0 1 | 1 |
| FBgn0003345 | sd | FBgn0027494 | RpS10a        | 0 | 0 0 1 | 1 |
| FBgn0003345 | sd | FBgn0039776 | PH4alphaEFB   | 0 | 0 1 0 | 1 |
| FBgn0003345 | sd | FBgn0030692 | mRpS30        | 0 | 1 0 0 | 1 |
| FBgn0003345 | sd | FBgn0000181 | bic           | 0 | 0 0 1 | 1 |
| FBgn0003345 | sd | FBgn0046214 | vig2          | 0 | 0 1 0 | 1 |
| FBgn0003345 | sd | FBgn0030672 | CG9281        | 0 | 0 1 0 | 1 |
| FBgn0003345 | sd | FBgn0004227 | nonA          | 0 | 0 1 0 | 1 |
| FBgn0003345 | sd | FBgn0010621 | Cct5          | 0 | 1 0 0 | 1 |
| FBgn0003345 | sd | FBgn0033767 | CG13148       | 0 | 1 0 0 | 1 |
| FBgn0003345 | sd | FBgn0015278 | Pi3K68D       | 0 | 0 0 1 | 1 |
| FBgn0003345 | sd | FBgn0042134 | Capr          | 0 | 0 1 0 | 1 |
| FBgn0003345 | sd | FBgn0031319 | CG4896        | 0 | 1 0 0 | 1 |
| FBgn0003345 | sd | FBgn0024177 | zpg           | 0 | 0 0 1 | 1 |
| FBgn0003345 | sd | FBgn0010438 | mtSSB         | 0 | 0 1 0 | 1 |
| FBgn0003345 | sd | FBgn0034968 | RpL12         | 0 | 1 0 0 | 1 |
| FBgn0003345 | sd | FBgn0263347 | Caf1          | 0 | 0 0 1 | 1 |
| FBgn0003345 | sd | FBgn0033342 | CG8258        | 0 | 1 0 0 | 1 |
| FBgn0003345 | sd | FBgn0031066 | CG14235       | 0 | 0 0 1 | 1 |
| FBgn0003345 | sd | FBgn0039663 | CG2321        | 0 | 0 1 0 | 1 |
| FBgn0003345 | sd | FBgn0039784 | CG9698        | 0 | 0 0 1 | 1 |
| FBgn0003345 | sd | FBgn0001230 | Hsp68         | 0 | 1 0 0 | 1 |
| FBgn0003345 | sd | FBgn0035010 | CG13579       | 0 | 0 1 0 | 1 |
| FBgn0003345 | sd | FBgn0033062 | Ars2          | 0 | 1 0 0 | 1 |
| FBgn0003345 | sd | FBgn0051159 | EF-G2         | 0 | 1 0 0 | 1 |
| FBgn0003345 | sd | FBgn0019990 | Gcn2          | 0 | 1 0 0 | 1 |
| FBgn0003345 | sd | FBgn0035262 | CG18171       | 0 | 0 1 0 | 1 |
| FBgn0003345 | sd | FBgn0011204 | cue           | 0 | 0 1 0 | 1 |
| FBgn0003345 | sd | FBgn0261592 | RpS6          | 0 | 0 0 1 | 1 |
| FBgn0003345 | sd | FBgn0036341 | Syx13         | 0 | 0 1 0 | 1 |
| FBgn0003345 | sd | FBgn0037728 | CG16817       | 0 | 0 0 1 | 1 |
| FBgn0003345 | sd | FBgn0031260 | Spp           | 0 | 0 1 0 | 1 |
| FBgn0003345 | sd | FBgn0030504 | CG2691        | 0 | 0 0 1 | 1 |
| FBgn0003345 | sd | FBgn0013810 | Dhc36C        | 0 | 0 0 1 | 1 |
| FBgn0003345 | sd | FBgn0016693 | Past1         | 0 | 0 1 0 | 1 |
| FBgn0003345 | sd | FBgn0031610 | CG15436       | 0 | 1 0 0 | 1 |
| FBgn0003345 | sd | FBgn0029685 | CG2938        | 0 | 0 1 0 | 1 |
| FBgn0003345 | sd | FBgn0000579 | Eno           | 0 | 0 0 1 | 1 |

## (A) entire PPIN

|             |            |             |                       |            |     |
|-------------|------------|-------------|-----------------------|------------|-----|
| FBgn0003345 | <b>sd</b>  | FBgn0011726 | <b>tsr</b>            | 0 0 0 1    | 1   |
| FBgn0003345 | <b>sd</b>  | FBgn0037280 | <b>CG1126</b>         | 0 1 0 0    | 1   |
| FBgn0003345 | <b>sd</b>  | FBgn0259744 | <b>CG42377</b>        | 0 0 0 1    | 1   |
| FBgn0003345 | <b>sd</b>  | FBgn0040207 | <b>kat80</b>          | 0 1 0 0    | 1   |
| FBgn0003345 | <b>sd</b>  | FBgn0035811 | <b>CG12262</b>        | 0 0 1 0    | 1   |
| FBgn0003345 | <b>sd</b>  | FBgn0033755 | <b>CIC-b</b>          | 0 0 1 0    | 1   |
| FBgn0003345 | <b>sd</b>  | FBgn0015240 | <b>Hr96</b>           | 0 1 0 0    | 1   |
| FBgn0003345 | <b>sd</b>  | FBgn0029105 | <b>alpha-catenin-</b> | 0 0 1 0    | 1   |
| FBgn0003345 | <b>sd</b>  | FBgn0032518 | <b>RpL24</b>          | 0 0 0 1    | 1   |
| FBgn0003345 | <b>sd</b>  | FBgn0261599 | <b>RpS29</b>          | 0 1 0 0    | 1   |
| FBgn0003345 | <b>sd</b>  | FBgn0000308 | <b>chic</b>           | 0 0 0 1    | 1   |
| FBgn0003345 | <b>sd</b>  | FBgn0013770 | <b>Cp1</b>            | 0 0 0 1    | 1   |
| FBgn0003345 | <b>sd</b>  | FBgn0027338 | <b>Kap-alpha3</b>     | 0 0 0 1    | 1   |
| FBgn0003345 | <b>sd</b>  | FBgn0086710 | <b>RpL30</b>          | 0 0 1 0    | 1   |
| FBgn0003345 | <b>sd</b>  | FBgn0040011 | <b>CG17494</b>        | 0 0 0 1    | 1   |
| FBgn0003345 | <b>sd</b>  | FBgn0263594 | <b>lost</b>           | 0 0 1 0    | 1   |
| FBgn0003345 | <b>sd</b>  | FBgn0028554 | <b>x16</b>            | 0 0 1 0    | 1   |
| FBgn0003345 | <b>sd</b>  | FBgn0087035 | <b>AGO2</b>           | 0 0 0 1    | 1   |
| FBgn0003345 | <b>sd</b>  | FBgn0028499 | <b>CG7985</b>         | 0 1 0 0    | 1   |
| FBgn0003345 | <b>sd</b>  | FBgn0035753 | <b>RpL18</b>          | 0 0 1 0    | 1   |
| FBgn0003345 | <b>sd</b>  | FBgn0013726 | <b>pnut</b>           | 0 1 0 0    | 1   |
| FBgn0003345 | <b>sd</b>  | FBgn0031169 | <b>CG1494</b>         | 0 0 1 0    | 1   |
| FBgn0003345 | <b>sd</b>  | FBgn0038400 | <b>CG5903</b>         | 0 1 0 0    | 1   |
| FBgn0003345 | <b>sd</b>  | FBgn0010352 | <b>Nc73EF</b>         | 0 1 0 0    | 1   |
| FBgn0003345 | <b>sd</b>  | FBgn0000258 | <b>Ckl1alpha</b>      | 0 1 0 0    | 1   |
| FBgn0003345 | <b>sd</b>  | FBgn0025865 | <b>Cortactin</b>      | 0 0 1 0    | 1   |
| FBgn0003345 | <b>sd</b>  | FBgn0041087 | <b>wun2</b>           | 0 0 1 0    | 1   |
| FBgn0003345 | <b>sd</b>  | FBgn0014026 | <b>RpL7A</b>          | 0 0 1 0    | 1   |
| FBgn0003345 | <b>sd</b>  | FBgn0014141 | <b>cher</b>           | 0 0 1 0    | 1   |
| FBgn0003345 | <b>sd</b>  | FBgn0028327 | <b>I(1)G0320</b>      | 0 1 0 0    | 1   |
| FBgn0003345 | <b>sd</b>  | FBgn0031422 | <b>CG9870</b>         | 0 0 1 0    | 1   |
| FBgn0003345 | <b>sd</b>  | FBgn0003279 | <b>RpL4</b>           | 0 0 1 0    | 1   |
| FBgn0003345 | <b>sd</b>  | FBgn0261014 | <b>TER94</b>          | 0 0 1 0    | 1   |
| FBgn0003345 | <b>sd</b>  | FBgn0033663 | <b>ERp60</b>          | 0 0 1 0    | 1   |
| FBgn0003345 | <b>sd</b>  | FBgn0005390 | <b>fs(1)M3</b>        | 0 0 0 1    | 1   |
| FBgn0003345 | <b>sd</b>  | FBgn0030886 | <b>CG12672</b>        | 0 0 0 1    | 1   |
| FBgn0003345 | <b>sd</b>  | FBgn0032444 | <b>CG5525</b>         | 0 0 1 0    | 1   |
| FBgn0003345 | <b>sd</b>  | FBgn0259734 | <b>CG42388</b>        | 0 0 1 0    | 1   |
| FBgn0003345 | <b>sd</b>  | FBgn0031463 | <b>CG15400</b>        | 0 0 1 0    | 1   |
| FBgn0003345 | <b>sd</b>  | FBgn0051926 | <b>CG31926</b>        | 0 1 0 0    | 1   |
| FBgn0003345 | <b>sd</b>  | FBgn0036663 | <b>CG9674</b>         | 0 0 0 1    | 1   |
| FBgn0003345 | <b>sd</b>  | FBgn0032961 | <b>CG1416</b>         | 0 0 1 0    | 1   |
| FBgn0003345 | <b>sd</b>  | FBgn0024509 | <b>sec13</b>          | 0 0 1 0    | 1   |
| FBgn0003345 | <b>sd</b>  | FBgn0036652 | <b>CG13032</b>        | 0 1 0 0    | 1   |
| FBgn0003345 | <b>sd</b>  | FBgn0064225 | <b>RpL5</b>           | 0 0 1 0    | 1   |
| FBgn0003345 | <b>sd</b>  | FBgn0010391 | <b>Gtp-bp</b>         | 0 0 1 0    | 1   |
| FBgn0003345 | <b>sd</b>  | FBgn0037230 | <b>CG9780</b>         | 0 0 1 0    | 1   |
| FBgn0003345 | <b>sd</b>  | FBgn0033540 | <b>Elp2</b>           | 0 0 0 1    | 1   |
| FBgn0003345 | <b>sd</b>  | FBgn0034585 | <b>CG4030</b>         | 0 0 1 0    | 1   |
| FBgn0003345 | <b>sd</b>  | FBgn0032512 | <b>CG9305</b>         | 0 0 1 0    | 1   |
| FBgn0053193 | <b>sav</b> | FBgn0261456 | <b>hpo</b>            | 1 42 47 50 | 139 |

## (A) entire PPIN

|                 |                                |                      |     |
|-----------------|--------------------------------|----------------------|-----|
| FBgn0053193 sav | FBgn0030734 <b>CG9911</b>      | 1 38 40 34           | 112 |
| FBgn0053193 sav | FBgn0031093 <b>CG9581</b>      | 1 37 37 38           | 112 |
| FBgn0053193 sav | FBgn0028331 <b>I(1)G0289</b>   | 1 18 22 23           | 63  |
| FBgn0053193 sav | FBgn0020255 <b>ran</b>         | <b>0.95</b> 4 7 7    | 18  |
| FBgn0053193 sav | FBgn0004638 <b>drk</b>         | <b>0.95</b> 4 4 5    | 13  |
| FBgn0053193 sav | FBgn0015019 <b>Cctgamma</b>    | <b>0.9</b> 3 4 4     | 11  |
| FBgn0053193 sav | FBgn0003517 <b>sta</b>         | <b>0.9</b> 3 4 3     | 10  |
| FBgn0053193 sav | FBgn0010348 <b>Arf79F</b>      | <b>0.88</b> 7 4 4    | 15  |
| FBgn0053193 sav | FBgn0033264 <b>Nup50</b>       | <b>0.88</b> 4 3 3    | 10  |
| FBgn0053193 sav | FBgn0013770 <b>Cp1</b>         | <b>0.81</b> 2 3 4    | 9   |
| FBgn0053193 sav | FBgn0263598 <b>Vha68-2</b>     | <b>0.79</b> 2 3 3    | 8   |
| FBgn0053193 sav | FBgn0039776 <b>PH4alphaEFB</b> | <b>0.72</b> 5 7 4    | 16  |
| FBgn0053193 sav | FBgn0263006 <b>Ca-P60A</b>     | <b>0.7</b> 2 5 5     | 12  |
| FBgn0053193 sav | FBgn0000317 <b>ck</b>          | <b>0.66</b> 6 6 1    | 13  |
| FBgn0053193 sav | FBgn0003600 <b>Su(var)3-9</b>  | <b>0.6</b> 2 2 3     | 7   |
| FBgn0053193 sav | FBgn0010551 <b>I(2)03709</b>   | <b>0.6</b> 2 3 1     | 6   |
| FBgn0053193 sav | FBgn0010246 <b>Myo61F</b>      | <b>0.59</b> 13 10 5  | 28  |
| FBgn0053193 sav | FBgn0025352 <b>Thiolase</b>    | <b>0.59</b> 4 4 0    | 8   |
| FBgn0053193 sav | FBgn0040007 <b>RpL38</b>       | <b>0.59</b> 1 3 2    | 6   |
| FBgn0053193 sav | FBgn0024556 <b>EfTuM</b>       | <b>0.56</b> 1 4 5    | 10  |
| FBgn0053193 sav | FBgn0261397 <b>didum</b>       | <b>0.54</b> 9 13 11  | 33  |
| FBgn0053193 sav | FBgn0000253 <b>Cam</b>         | <b>0.54</b> 5 6 3    | 14  |
| FBgn0053193 sav | FBgn0010621 <b>Cct5</b>        | <b>0.54</b> 1 4 5    | 10  |
| FBgn0053193 sav | FBgn0262127 <b>kibra</b>       | <b>0.54</b> 4 1 4    | 9   |
| FBgn0053193 sav | FBgn0028479 <b>CG4389</b>      | <b>0.53</b> 3 4 2    | 9   |
| FBgn0053193 sav | FBgn0028734 <b>Fmr1</b>        | <b>0.48</b> 9 7 7    | 23  |
| FBgn0053193 sav | FBgn0037312 <b>CG11999</b>     | <b>0.48</b> 2 2 1    | 5   |
| FBgn0053193 sav | FBgn0003261 <b>Rm62</b>        | <b>0.45</b> 10 12 10 | 32  |
| FBgn0053193 sav | FBgn0046214 <b>vig2</b>        | <b>0.42</b> 4 5 5    | 14  |
| FBgn0053193 sav | FBgn0261014 <b>TER94</b>       | <b>0.42</b> 3 1 2    | 6   |
| FBgn0053193 sav | FBgn0038805 <b>TFAM</b>        | <b>0.4</b> 4 5 3     | 12  |
| FBgn0053193 sav | FBgn0022959 <b>yps</b>         | <b>0.39</b> 1 3 4    | 8   |
| FBgn0053193 sav | FBgn0263106 <b>DnaJ-1</b>      | <b>0.36</b> 4 3 3    | 10  |
| FBgn0053193 sav | FBgn0011571 <b>caz</b>         | <b>0.36</b> 0 3 1    | 4   |
| FBgn0053193 sav | FBgn0086443 <b>Aats-asn</b>    | <b>0.36</b> 2 2 0    | 4   |
| FBgn0053193 sav | FBgn0032987 <b>RpL21</b>       | <b>0.36</b> 3 0 1    | 4   |
| FBgn0053193 sav | FBgn0087035 <b>AGO2</b>        | <b>0.35</b> 8 6 4    | 18  |
| FBgn0053193 sav | FBgn0037719 <b>bocksbeutel</b> | <b>0.35</b> 7 3 4    | 14  |
| FBgn0053193 sav | FBgn0004378 <b>Klp61F</b>      | <b>0.35</b> 1 2 1    | 4   |
| FBgn0053193 sav | FBgn0053303 <b>CG33303</b>     | <b>0.34</b> 7 11 6   | 24  |
| FBgn0053193 sav | FBgn0035811 <b>CG12262</b>     | <b>0.33</b> 3 1 3    | 7   |
| FBgn0053193 sav | FBgn0064225 <b>RpL5</b>        | <b>0.32</b> 3 2 2    | 7   |
| FBgn0053193 sav | FBgn0033062 <b>Ars2</b>        | <b>0.31</b> 3 2 2    | 7   |
| FBgn0053193 sav | FBgn0020618 <b>Rack1</b>       | <b>0.3</b> 0 3 4     | 7   |
| FBgn0053193 sav | FBgn0032393 <b>CG12264</b>     | <b>0.3</b> 2 1 0     | 3   |
| FBgn0053193 sav | FBgn0015282 <b>Pros26.4</b>    | <b>0.29</b> 1 2 0    | 3   |
| FBgn0053193 sav | FBgn0039635 <b>CG11876</b>     | <b>0.28</b> 0 0 3    | 3   |
| FBgn0053193 sav | FBgn0024733 <b>RpL10</b>       | <b>0.27</b> 1 2 0    | 3   |
| FBgn0053193 sav | FBgn0032444 <b>CG5525</b>      | <b>0.26</b> 3 5 5    | 13  |
| FBgn0053193 sav | FBgn0037607 <b>CG8036</b>      | <b>0.26</b> 0 0 3    | 3   |
| FBgn0053193 sav | FBgn0026409 <b>Mpcp</b>        | <b>0.25</b> 2 2 2    | 6   |

## (A) entire PPIN

|                 |                                 |      |             |     |
|-----------------|---------------------------------|------|-------------|-----|
| FBgn0053193 sav | FBgn0061200 <b>Nup153</b>       | 0.24 | 2 3 2       | 7   |
| FBgn0053193 sav | FBgn0039359 <b>RpL27</b>        | 0.24 | 2 1 0       | 3   |
| FBgn0053193 sav | FBgn0003279 <b>RpL4</b>         | 0.24 | 2 0 1       | 3   |
| FBgn0053193 sav | FBgn0027084 <b>Aats-lys</b>     | 0.21 | 0 1 2       | 3   |
| FBgn0053193 sav | FBgn0002031 <b>I(2)37Cc</b>     | 0.21 | 0 2 0       | 2   |
| FBgn0053193 sav | FBgn0003022 <b>Ote</b>          | 0.19 | 11 6 8      | 25  |
| FBgn0053193 sav | FBgn0023167 <b>SmD3</b>         | 0.19 | 0 2 0       | 2   |
| FBgn0053193 sav | FBgn0263510 <b>nclb</b>         | 0.18 | 1 2 0       | 3   |
| FBgn0053193 sav | FBgn0039713 <b>RpS8</b>         | 0.18 | 1 2 0       | 3   |
| FBgn0053193 sav | FBgn0004227 <b>nonA</b>         | 0.17 | 5 4 3       | 12  |
| FBgn0053193 sav | FBgn0015756 <b>RpL9</b>         | 0.17 | 2 6 3       | 11  |
| FBgn0053193 sav | FBgn0041775 <b>tral</b>         | 0.17 | 1 3 2       | 6   |
| FBgn0053193 sav | FBgn0039302 <b>Nup358</b>       | 0.17 | 1 1 2       | 4   |
| FBgn0053193 sav | FBgn0032731 <b>CG10641</b>      | 0.16 | 7 5 5       | 17  |
| FBgn0053193 sav | FBgn0030086 <b>CG7033</b>       | 0.16 | 1 2 3       | 6   |
| FBgn0053193 sav | FBgn0263594 <b>lost</b>         | 0.15 | 2 0 1       | 3   |
| FBgn0053193 sav | FBgn0032961 <b>CG1416</b>       | 0.14 | 0 2 0       | 2   |
| FBgn0053193 sav | FBgn0021795 <b>Tapdelta</b>     | 0.13 | 2 1 2       | 5   |
| FBgn0053193 sav | FBgn0031799 <b>Pez</b>          | 0.12 | 0 2 0       | 2   |
| FBgn0053193 sav | FBgn0010411 <b>RpS18</b>        | 0.1  | 2 2 2       | 6   |
| FBgn0053193 sav | FBgn0010352 <b>Nc73EF</b>       | 0.1  | 1 1 2       | 4   |
| FBgn0053193 sav | FBgn0086656 <b>shrb</b>         | 0.09 | 2 2 2       | 6   |
| FBgn0053193 sav | FBgn0036702 <b>CG6512</b>       | 0.09 | 0 2 0       | 2   |
| FBgn0053193 sav | FBgn0019936 <b>RpS20</b>        | 0.08 | 3 5 4       | 12  |
| FBgn0053193 sav | FBgn0015268 <b>Nap1</b>         | 0.08 | 3 0 1       | 4   |
| FBgn0053193 sav | FBgn0086347 <b>Myo31DF</b>      | 0.07 | 2 0 2       | 4   |
| FBgn0053193 sav | FBgn0037643 <b>skap</b>         | 0.07 | 1 2 1       | 4   |
| FBgn0053193 sav | FBgn0086710 <b>RpL30</b>        | 0.06 | 2 2 2       | 6   |
| FBgn0053193 sav | FBgn0013269 <b>FK506-bp1</b>    | 0.06 | 1 1 3       | 5   |
| FBgn0053193 sav | FBgn0022288 <b>I(2)09851</b>    | 0.06 | 0 2 0       | 2   |
| FBgn0053193 sav | FBgn0262716 <b>Arp66B</b>       | 0.05 | 4 6 4       | 14  |
| FBgn0053193 sav | FBgn0250814 <b>CG4169</b>       | 0.04 | 6 6 4       | 16  |
| FBgn0053193 sav | FBgn0013981 <b>His4r</b>        | 0.04 | 3 2 1       | 6   |
| FBgn0053193 sav | FBgn0027329 <b>Tcp-1zeta</b>    | 0.03 | 3 3 4       | 10  |
| FBgn0053193 sav | FBgn0024308 <b>Smr</b>          | 0.03 | 1 2 0       | 3   |
| FBgn0053193 sav | FBgn0053868 <b>His2B:CG3386</b> | 0.03 | 2 0 0       | 2   |
| FBgn0053193 sav | FBgn0004888 <b>Scsalpha</b>     | 0.02 | 4 3 6       | 13  |
| FBgn0053193 sav | FBgn0025286 <b>RpL31</b>        | 0.02 | 2 2 3       | 7   |
| FBgn0053193 sav | FBgn0017545 <b>RpS3A</b>        | 0.02 | 1 1 3       | 5   |
| FBgn0053193 sav | FBgn0010265 <b>RpS13</b>        | 0.02 | 1 2 1       | 4   |
| FBgn0053193 sav | FBgn0005674 <b>Aats-glupro</b>  | 0.02 | 1 2 1       | 4   |
| FBgn0053193 sav | FBgn0028695 <b>Rpn1</b>         | 0.02 | 2 1 0       | 3   |
| FBgn0053193 sav | FBgn0015589 <b>Apc</b>          | 0.02 | 0 0 2       | 2   |
| FBgn0053193 sav | FBgn0034968 <b>RpL12</b>        | 0.01 | 3 3 2       | 8   |
| FBgn0053193 sav | FBgn0001217 <b>Hsc70-2</b>      | 0.01 | 2 2 2       | 6   |
| FBgn0053193 sav | FBgn0035589 <b>CHMP2B</b>       | 0.01 | 2 1 2       | 5   |
| FBgn0053193 sav | FBgn0024987 <b>ssx</b>          | 0.01 | 1 3 0       | 4   |
| FBgn0053193 sav | FBgn0039580 <b>Gfat2</b>        | 0.01 | 2 0 0       | 2   |
| FBgn0053193 sav | FBgn0005634 <b>zip</b>          | 0    | 213 232 223 | 668 |
| FBgn0053193 sav | FBgn0001219 <b>Hsc70-4</b>      | 0    | 41 42 43    | 126 |
| FBgn0053193 sav | FBgn0000042 <b>Act5C</b>        | 0    | 42 40 43    | 125 |

## (A) entire PPIN

|                 |                                |            |     |
|-----------------|--------------------------------|------------|-----|
| FBgn0053193 sav | FBgn0000556 <b>Ef1alpha48D</b> | 0 33 35 32 | 100 |
| FBgn0053193 sav | FBgn0002525 <b>Lam</b>         | 0 31 30 27 | 88  |
| FBgn0053193 sav | FBgn0001218 <b>Hsc70-3</b>     | 0 28 25 25 | 78  |
| FBgn0053193 sav | FBgn0003887 <b>betaTub56D</b>  | 0 21 26 26 | 73  |
| FBgn0053193 sav | FBgn0003884 <b>alphaTub84B</b> | 0 21 22 25 | 68  |
| FBgn0053193 sav | FBgn0003178 <b>PyK</b>         | 0 21 18 21 | 60  |
| FBgn0053193 sav | FBgn0000709 <b>fil1</b>        | 0 22 20 13 | 55  |
| FBgn0053193 sav | FBgn0003721 <b>Tm1</b>         | 0 21 17 12 | 50  |
| FBgn0053193 sav | FBgn0030699 <b>CG8578</b>      | 0 20 13 14 | 47  |
| FBgn0053193 sav | FBgn0263231 <b>bel</b>         | 0 17 9 10  | 36  |
| FBgn0053193 sav | FBgn0039757 <b>RpS7</b>        | 0 11 12 10 | 33  |
| FBgn0053193 sav | FBgn0034577 <b>cpa</b>         | 0 10 11 12 | 33  |
| FBgn0053193 sav | FBgn0003360 <b>sesB</b>        | 0 11 9 11  | 31  |
| FBgn0053193 sav | FBgn0002622 <b>RpS3</b>        | 0 11 11 8  | 30  |
| FBgn0053193 sav | FBgn0004687 <b>Mlc-c</b>       | 0 9 10 10  | 29  |
| FBgn0053193 sav | FBgn0001942 <b>eIF-4a</b>      | 0 8 11 9   | 28  |
| FBgn0053193 sav | FBgn0003676 <b>T-cp1</b>       | 0 7 8 11   | 26  |
| FBgn0053193 sav | FBgn0038145 <b>Droj2</b>       | 0 8 9 9    | 26  |
| FBgn0053193 sav | FBgn0031977 <b>baf</b>         | 0 10 8 8   | 26  |
| FBgn0053193 sav | FBgn0037891 <b>CG5214</b>      | 0 10 8 7   | 25  |
| FBgn0053193 sav | FBgn0010217 <b>ATPsyn-beta</b> | 0 9 10 5   | 24  |
| FBgn0053193 sav | FBgn0029176 <b>Ef1gamma</b>    | 0 8 7 8    | 23  |
| FBgn0053193 sav | FBgn0250789 <b>alpha-Spec</b>  | 0 11 7 5   | 23  |
| FBgn0053193 sav | FBgn0000044 <b>Act57B</b>      | 0 9 6 8    | 23  |
| FBgn0053193 sav | FBgn0035499 <b>Chd64</b>       | 0 5 10 8   | 23  |
| FBgn0053193 sav | FBgn0011211 <b>blw</b>         | 0 6 9 8    | 23  |
| FBgn0053193 sav | FBgn0001233 <b>Hsp83</b>       | 0 4 8 10   | 22  |
| FBgn0053193 sav | FBgn0261710 <b>nocte</b>       | 0 6 5 9    | 20  |
| FBgn0053193 sav | FBgn0001220 <b>Hsc70-5</b>     | 0 8 2 8    | 18  |
| FBgn0053193 sav | FBgn0011284 <b>RpS4</b>        | 0 6 5 7    | 18  |
| FBgn0053193 sav | FBgn0261619 <b>pAbp</b>        | 0 6 3 9    | 18  |
| FBgn0053193 sav | FBgn0027066 <b>Eb1</b>         | 0 7 5 5    | 17  |
| FBgn0053193 sav | FBgn0034743 <b>RpS16</b>       | 0 4 7 5    | 16  |
| FBgn0053193 sav | FBgn0011570 <b>cpb</b>         | 0 6 4 6    | 16  |
| FBgn0053193 sav | FBgn0082582 <b>tmod</b>        | 0 4 6 4    | 14  |
| FBgn0053193 sav | FBgn0263396 <b>sqd</b>         | 0 4 5 4    | 13  |
| FBgn0053193 sav | FBgn0262734 <b>Rbp2</b>        | 0 4 4 5    | 13  |
| FBgn0053193 sav | FBgn0002645 <b>Map205</b>      | 0 3 6 4    | 13  |
| FBgn0053193 sav | FBgn0015778 <b>rin</b>         | 0 5 3 4    | 12  |
| FBgn0053193 sav | FBgn0031256 <b>CG4164</b>      | 0 5 5 2    | 12  |
| FBgn0053193 sav | FBgn0010078 <b>RpL23</b>       | 0 3 4 5    | 12  |
| FBgn0053193 sav | FBgn0001216 <b>Hsc70-1</b>     | 0 4 4 4    | 12  |
| FBgn0053193 sav | FBgn0039697 <b>CG7834</b>      | 0 4 3 4    | 11  |
| FBgn0053193 sav | FBgn0027932 <b>Akap200</b>     | 0 4 4 3    | 11  |
| FBgn0053193 sav | FBgn0004403 <b>RpS14a</b>      | 0 4 4 3    | 11  |
| FBgn0053193 sav | FBgn0261593 <b>RpS10b</b>      | 0 3 3 4    | 10  |
| FBgn0053193 sav | FBgn0015834 <b>Trip1</b>       | 0 3 3 4    | 10  |
| FBgn0053193 sav | FBgn0002780 <b>mod</b>         | 0 3 4 3    | 10  |
| FBgn0053193 sav | FBgn0086904 <b>Nacalpa</b>     | 0 3 3 3    | 9   |
| FBgn0053193 sav | FBgn0000258 <b>Ckl1alpha</b>   | 0 2 4 3    | 9   |
| FBgn0053193 sav | FBgn0034970 <b>yki</b>         | 0 3 2 3    | 8   |

## (A) entire PPIN

|                 |                                |         |   |
|-----------------|--------------------------------|---------|---|
| FBgn0053193 sav | FBgn0003890 <b>betaTub97EF</b> | 0 2 3 3 | 8 |
| FBgn0053193 sav | FBgn0011225 <b>jar</b>         | 0 2 4 2 | 8 |
| FBgn0053193 sav | FBgn0028327 <b>I(1)G0320</b>   | 0 4 1 3 | 8 |
| FBgn0053193 sav | FBgn0014189 <b>Hel25E</b>      | 0 2 3 2 | 7 |
| FBgn0053193 sav | FBgn0051363 <b>Jupiter</b>     | 0 2 4 1 | 7 |
| FBgn0053193 sav | FBgn0032859 <b>Arc-p34</b>     | 0 3 2 2 | 7 |
| FBgn0053193 sav | FBgn0010198 <b>RpS15Aa</b>     | 0 3 2 2 | 7 |
| FBgn0053193 sav | FBgn0013325 <b>RpL11</b>       | 0 1 2 4 | 7 |
| FBgn0053193 sav | FBgn0039300 <b>RpS27</b>       | 0 2 2 2 | 6 |
| FBgn0053193 sav | FBgn0035608 <b>blanks</b>      | 0 2 3 1 | 6 |
| FBgn0053193 sav | FBgn0000181 <b>bic</b>         | 0 3 1 2 | 6 |
| FBgn0053193 sav | FBgn0010408 <b>RpS9</b>        | 0 2 2 2 | 6 |
| FBgn0053193 sav | FBgn0261609 <b>eIF-2alpha</b>  | 0 2 2 2 | 6 |
| FBgn0053193 sav | FBgn0040227 <b>eIF-3p66</b>    | 0 1 2 3 | 6 |
| FBgn0053193 sav | FBgn0028737 <b>Ef1beta</b>     | 0 2 2 1 | 5 |
| FBgn0053193 sav | FBgn0003888 <b>betaTub60D</b>  | 0 0 3 2 | 5 |
| FBgn0053193 sav | FBgn0001961 <b>Sop2</b>        | 0 2 2 1 | 5 |
| FBgn0053193 sav | FBgn0029093 <b>cathD</b>       | 0 2 0 3 | 5 |
| FBgn0053193 sav | FBgn0030993 <b>Mec2</b>        | 0 2 2 1 | 5 |
| FBgn0053193 sav | FBgn0036213 <b>RpL10Ab</b>     | 0 2 1 2 | 5 |
| FBgn0053193 sav | FBgn0004867 <b>RpS2</b>        | 0 1 0 4 | 5 |
| FBgn0053193 sav | FBgn0003941 <b>RpL40</b>       | 0 2 1 2 | 5 |
| FBgn0053193 sav | FBgn0003514 <b>sqh</b>         | 0 1 3 0 | 4 |
| FBgn0053193 sav | FBgn0011742 <b>Arp14D</b>      | 0 1 2 1 | 4 |
| FBgn0053193 sav | FBgn0000173 <b>ben</b>         | 0 1 1 2 | 4 |
| FBgn0053193 sav | FBgn0031781 <b>Arc-p20</b>     | 0 1 2 1 | 4 |
| FBgn0053193 sav | FBgn0004363 <b>porin</b>       | 0 2 1 1 | 4 |
| FBgn0053193 sav | FBgn0004237 <b>Hrb87F</b>      | 0 2 1 1 | 4 |
| FBgn0053193 sav | FBgn0000319 <b>Chc</b>         | 0 1 2 1 | 4 |
| FBgn0053193 sav | FBgn0039129 <b>RpS19b</b>      | 0 1 1 1 | 3 |
| FBgn0053193 sav | FBgn0034138 <b>RpS15</b>       | 0 1 1 1 | 3 |
| FBgn0053193 sav | FBgn0037632 <b>Tcp-1eta</b>    | 0 1 1 1 | 3 |
| FBgn0053193 sav | FBgn0035987 <b>CG3689</b>      | 0 1 1 1 | 3 |
| FBgn0053193 sav | FBgn0005586 <b>Rab3</b>        | 0 1 1 1 | 3 |
| FBgn0053193 sav | FBgn0027494 <b>RpS10a</b>      | 0 1 1 1 | 3 |
| FBgn0053193 sav | FBgn0028470 <b>Patr-1</b>      | 0 1 1 1 | 3 |
| FBgn0053193 sav | FBgn0033844 <b>bbc</b>         | 0 1 1 1 | 3 |
| FBgn0053193 sav | FBgn0030672 <b>CG9281</b>      | 0 1 1 1 | 3 |
| FBgn0053193 sav | FBgn0029118 <b>Sucb</b>        | 0 1 1 1 | 3 |
| FBgn0053193 sav | FBgn0026761 <b>Trap1</b>       | 0 1 1 1 | 3 |
| FBgn0053193 sav | FBgn0039229 <b>Saf-B</b>       | 0 1 1 1 | 3 |
| FBgn0053193 sav | FBgn0031066 <b>CG14235</b>     | 0 1 1 1 | 3 |
| FBgn0053193 sav | FBgn0010173 <b>RpA-70</b>      | 0 2 1 0 | 3 |
| FBgn0053193 sav | FBgn0025885 <b>Inos</b>        | 0 1 1 1 | 3 |
| FBgn0053193 sav | FBgn0035033 <b>CG3548</b>      | 0 1 1 1 | 3 |
| FBgn0053193 sav | FBgn0011726 <b>tsr</b>         | 0 1 1 1 | 3 |
| FBgn0053193 sav | FBgn0000043 <b>Act42A</b>      | 0 1 1 1 | 3 |
| FBgn0053193 sav | FBgn0014029 <b>Sep2</b>        | 0 0 2 1 | 3 |
| FBgn0053193 sav | FBgn0011710 <b>Sep1</b>        | 0 0 1 2 | 3 |
| FBgn0053193 sav | FBgn0001315 <b>kl-5</b>        | 0 1 1 1 | 3 |
| FBgn0053193 sav | FBgn0004401 <b>Pep</b>         | 0 1 1 1 | 3 |



## (A) entire PPIN

|                 |                                |         |   |
|-----------------|--------------------------------|---------|---|
| FBgn0053193 sav | FBgn0015797 <b>Rab6</b>        | 0 1 1 1 | 3 |
| FBgn0053193 sav | FBgn0034237 <b>eIF3-S9</b>     | 0 1 1 1 | 3 |
| FBgn0053193 sav | FBgn0028969 <b>deltaCOP</b>    | 0 1 1 1 | 3 |
| FBgn0053193 sav | FBgn0001215 <b>Hrb98DE</b>     | 0 1 0 2 | 3 |
| FBgn0053193 sav | FBgn0011692 <b>pav</b>         | 0 1 0 1 | 2 |
| FBgn0053193 sav | FBgn0261596 <b>RpS24</b>       | 0 1 1 0 | 2 |
| FBgn0053193 sav | FBgn0000559 <b>Ef2b</b>        | 0 0 0 2 | 2 |
| FBgn0053193 sav | FBgn0015245 <b>Hsp60</b>       | 0 0 1 1 | 2 |
| FBgn0053193 sav | FBgn0011016 <b>SsRbeta</b>     | 0 0 1 1 | 2 |
| FBgn0053193 sav | FBgn0039562 <b>Gp93</b>        | 0 1 1 0 | 2 |
| FBgn0053193 sav | FBgn0005666 <b>bt</b>          | 0 0 0 2 | 2 |
| FBgn0053193 sav | FBgn0035500 <b>ens</b>         | 0 1 1 0 | 2 |
| FBgn0053193 sav | FBgn0028692 <b>Rpn2</b>        | 0 1 1 0 | 2 |
| FBgn0053193 sav | FBgn0024183 <b>vig</b>         | 0 1 1 0 | 2 |
| FBgn0053193 sav | FBgn0027598 <b>cindr</b>       | 0 1 1 0 | 2 |
| FBgn0053193 sav | FBgn0026562 <b>BM-40-SPARC</b> | 0 0 1 1 | 2 |
| FBgn0053193 sav | FBgn0011640 <b>lark</b>        | 0 1 1 0 | 2 |
| FBgn0053193 sav | FBgn0023517 <b>Pgam5</b>       | 0 1 1 0 | 2 |
| FBgn0053193 sav | FBgn0263347 <b>Caf1</b>        | 0 1 0 1 | 2 |
| FBgn0053193 sav | FBgn0262125 <b>sec23</b>       | 0 1 0 1 | 2 |
| FBgn0053193 sav | FBgn0014009 <b>Rab2</b>        | 0 1 0 1 | 2 |
| FBgn0053193 sav | FBgn0000100 <b>RpLP0</b>       | 0 1 1 0 | 2 |
| FBgn0053193 sav | FBgn0010409 <b>RpL18A</b>      | 0 1 1 0 | 2 |
| FBgn0053193 sav | FBgn0058042 <b>CG40042</b>     | 0 1 1 0 | 2 |
| FBgn0053193 sav | FBgn0001092 <b>Gapdh2</b>      | 0 0 1 1 | 2 |
| FBgn0053193 sav | FBgn0004167 <b>kst</b>         | 0 2 0 0 | 2 |
| FBgn0053193 sav | FBgn0035872 <b>CG7185</b>      | 0 1 1 0 | 2 |
| FBgn0053193 sav | FBgn0031437 <b>p16-ARC</b>     | 0 1 1 0 | 2 |
| FBgn0053193 sav | FBgn0015795 <b>Rab7</b>        | 0 0 1 1 | 2 |
| FBgn0053193 sav | FBgn0038742 <b>Arc42</b>       | 0 1 1 0 | 2 |
| FBgn0053193 sav | FBgn0022343 <b>CG3760</b>      | 0 1 0 1 | 2 |
| FBgn0053193 sav | FBgn0010909 <b>msn</b>         | 0 1 1 0 | 2 |
| FBgn0053193 sav | FBgn0027338 <b>Kap-alpha3</b>  | 0 1 0 1 | 2 |
| FBgn0053193 sav | FBgn0029897 <b>RpL17</b>       | 0 0 1 1 | 2 |
| FBgn0053193 sav | FBgn0033889 <b>CG6701</b>      | 0 1 1 0 | 2 |
| FBgn0053193 sav | FBgn0035753 <b>RpL18</b>       | 0 0 1 1 | 2 |
| FBgn0053193 sav | FBgn0032363 <b>CG6509</b>      | 0 1 1 0 | 2 |
| FBgn0053193 sav | FBgn0026372 <b>RpL23A</b>      | 0 1 0 1 | 2 |
| FBgn0053193 sav | FBgn0038723 <b>CG6195</b>      | 0 0 1 1 | 2 |
| FBgn0053193 sav | FBgn0014269 <b>prod</b>        | 0 1 0 1 | 2 |
| FBgn0053193 sav | FBgn0034432 <b>CG7461</b>      | 0 0 1 0 | 1 |
| FBgn0053193 sav | FBgn0028979 <b>tio</b>         | 0 0 0 1 | 1 |
| FBgn0053193 sav | FBgn0032489 <b>CG15480</b>     | 0 0 1 0 | 1 |
| FBgn0053193 sav | FBgn0035260 <b>CG7991</b>      | 0 0 0 1 | 1 |
| FBgn0053193 sav | FBgn0020617 <b>Rx</b>          | 0 0 1 0 | 1 |
| FBgn0053193 sav | FBgn0030992 <b>CG33253</b>     | 0 0 0 1 | 1 |
| FBgn0053193 sav | FBgn0039286 <b>dan</b>         | 0 0 0 1 | 1 |
| FBgn0053193 sav | FBgn0041180 <b>TepIV</b>       | 0 0 1 0 | 1 |
| FBgn0053193 sav | FBgn0261790 <b>SmE</b>         | 0 0 0 1 | 1 |
| FBgn0053193 sav | FBgn0032303 <b>CG6508</b>      | 0 0 0 1 | 1 |
| FBgn0053193 sav | FBgn0086906 <b>sls</b>         | 0 0 0 1 | 1 |

## (A) entire PPIN

|                 |                                  |         |   |
|-----------------|----------------------------------|---------|---|
| FBgn0053193 sav | FBgn0016700 <b>Rab1</b>          | 0 0 0 1 | 1 |
| FBgn0053193 sav | FBgn0261606 <b>RpL27A</b>        | 0 1 0 0 | 1 |
| FBgn0053193 sav | FBgn0034312 <b>CG10916</b>       | 0 0 1 0 | 1 |
| FBgn0053193 sav | FBgn0033504 <b>CAP</b>           | 0 0 1 0 | 1 |
| FBgn0053193 sav | FBgn0030293 <b>CG1737</b>        | 0 1 0 0 | 1 |
| FBgn0053193 sav | FBgn0038830 <b>CG17272</b>       | 0 0 1 0 | 1 |
| FBgn0053193 sav | FBgn0003732 <b>Top2</b>          | 0 0 0 1 | 1 |
| FBgn0053193 sav | FBgn0263706 <b>CG43658</b>       | 0 0 1 0 | 1 |
| FBgn0053193 sav | FBgn0026753 <b>Vha13</b>         | 0 1 0 0 | 1 |
| FBgn0053193 sav | FBgn0260462 <b>CG12163</b>       | 0 0 1 0 | 1 |
| FBgn0053193 sav | FBgn0063485 <b>Lasp</b>          | 0 1 0 0 | 1 |
| FBgn0053193 sav | FBgn0002431 <b>hyd</b>           | 0 1 0 0 | 1 |
| FBgn0053193 sav | FBgn0030322 <b>CG15220</b>       | 0 1 0 0 | 1 |
| FBgn0053193 sav | FBgn0011787 <b>mRpL12</b>        | 0 0 0 1 | 1 |
| FBgn0053193 sav | FBgn0050122 <b>CG30122</b>       | 0 0 0 1 | 1 |
| FBgn0053193 sav | FBgn0034259 <b>CG6459</b>        | 0 1 0 0 | 1 |
| FBgn0053193 sav | FBgn0037270 <b>CG9769</b>        | 0 0 1 0 | 1 |
| FBgn0053193 sav | FBgn0004907 <b>14-3-3zeta</b>    | 0 1 0 0 | 1 |
| FBgn0053193 sav | FBgn0261610 <b>CG42699</b>       | 0 1 0 0 | 1 |
| FBgn0053193 sav | FBgn0011286 <b>Rya-r44F</b>      | 0 0 0 1 | 1 |
| FBgn0053193 sav | FBgn0053555 <b>btsz</b>          | 0 1 0 0 | 1 |
| FBgn0053193 sav | FBgn0029785 <b>RpL35</b>         | 0 0 0 1 | 1 |
| FBgn0053193 sav | FBgn0033902 <b>Tango7</b>        | 0 1 0 0 | 1 |
| FBgn0053193 sav | FBgn0042134 <b>Capr</b>          | 0 0 1 0 | 1 |
| FBgn0053193 sav | FBgn0011272 <b>RpL13</b>         | 0 0 0 1 | 1 |
| FBgn0053193 sav | FBgn0010333 <b>Rac1</b>          | 0 0 1 0 | 1 |
| FBgn0053193 sav | FBgn0010412 <b>RpS19a</b>        | 0 0 0 1 | 1 |
| FBgn0053193 sav | FBgn0030716 <b>CG9170</b>        | 0 0 0 1 | 1 |
| FBgn0053193 sav | FBgn0034310 <b>Nup75</b>         | 0 0 0 1 | 1 |
| FBgn0053193 sav | FBgn0033352 <b>CG8232</b>        | 0 0 1 0 | 1 |
| FBgn0053193 sav | FBgn0015283 <b>Pros54</b>        | 0 0 1 0 | 1 |
| FBgn0053193 sav | FBgn0020910 <b>RpL3</b>          | 0 0 0 1 | 1 |
| FBgn0053193 sav | FBgn0023090 <b>dtr</b>           | 0 1 0 0 | 1 |
| FBgn0053193 sav | FBgn0263350 <b>alpha-Adaptin</b> | 0 0 1 0 | 1 |
| FBgn0053193 sav | FBgn0033342 <b>CG8258</b>        | 0 0 0 1 | 1 |
| FBgn0053193 sav | FBgn0259139 <b>glo</b>           | 0 1 0 0 | 1 |
| FBgn0053193 sav | FBgn0030136 <b>RpS28b</b>        | 0 0 1 0 | 1 |
| FBgn0053193 sav | FBgn0261458 <b>capt</b>          | 0 0 1 0 | 1 |
| FBgn0053193 sav | FBgn0025457 <b>Bub3</b>          | 0 0 0 1 | 1 |
| FBgn0053193 sav | FBgn0051087 <b>CG31087</b>       | 0 1 0 0 | 1 |
| FBgn0053193 sav | FBgn0004649 <b>yl</b>            | 0 0 1 0 | 1 |
| FBgn0053193 sav | FBgn0037912 <b>sea</b>           | 0 0 1 0 | 1 |
| FBgn0053193 sav | FBgn0013988 <b>Strn-Mlck</b>     | 0 0 1 0 | 1 |
| FBgn0053193 sav | FBgn0086694 <b>Bre1</b>          | 0 1 0 0 | 1 |
| FBgn0053193 sav | FBgn0014133 <b>bif</b>           | 0 1 0 0 | 1 |
| FBgn0053193 sav | FBgn0033107 <b>koi</b>           | 0 0 0 1 | 1 |
| FBgn0053193 sav | FBgn0032833 <b>CG10664</b>       | 0 1 0 0 | 1 |
| FBgn0053193 sav | FBgn0029766 <b>CG15784</b>       | 0 0 0 1 | 1 |
| FBgn0053193 sav | FBgn0030000 <b>CG2260</b>        | 0 0 1 0 | 1 |
| FBgn0053193 sav | FBgn0030504 <b>CG2691</b>        | 0 0 0 1 | 1 |
| FBgn0053193 sav | FBgn0010516 <b>wal</b>           | 0 0 1 0 | 1 |

## (A) entire PPIN

|                 |                                |         |   |
|-----------------|--------------------------------|---------|---|
| FBgn0053193 sav | FBgn0033879 <b>CG6543</b>      | 0 0 1 0 | 1 |
| FBgn0053193 sav | FBgn0037601 <b>Cyp313b1</b>    | 0 0 0 1 | 1 |
| FBgn0053193 sav | FBgn0261259 <b>Fhos</b>        | 0 0 0 1 | 1 |
| FBgn0053193 sav | FBgn0263391 <b>hts</b>         | 0 0 1 0 | 1 |
| FBgn0053193 sav | FBgn0023458 <b>Rbcn-3A</b>     | 0 0 1 0 | 1 |
| FBgn0053193 sav | FBgn0261565 <b>Lmpt</b>        | 0 0 1 0 | 1 |
| FBgn0053193 sav | FBgn0000479 <b>dnc</b>         | 0 0 1 0 | 1 |
| FBgn0053193 sav | FBgn0038032 <b>CG10096</b>     | 0 1 0 0 | 1 |
| FBgn0053193 sav | FBgn0051122 <b>CG31122</b>     | 0 1 0 0 | 1 |
| FBgn0053193 sav | FBgn0030747 <b>CG4301</b>      | 0 1 0 0 | 1 |
| FBgn0053193 sav | FBgn0036977 <b>CG5665</b>      | 0 1 0 0 | 1 |
| FBgn0053193 sav | FBgn0035424 <b>CG11505</b>     | 0 1 0 0 | 1 |
| FBgn0053193 sav | FBgn0035600 <b>CG4769</b>      | 0 0 0 1 | 1 |
| FBgn0053193 sav | FBgn0032124 <b>CG17855</b>     | 0 1 0 0 | 1 |
| FBgn0053193 sav | FBgn0005533 <b>RpS17</b>       | 0 0 0 1 | 1 |
| FBgn0053193 sav | FBgn0028325 <b>I(1)G0334</b>   | 0 0 1 0 | 1 |
| FBgn0053193 sav | FBgn0031010 <b>CG8028</b>      | 0 0 0 1 | 1 |
| FBgn0053193 sav | FBgn0032518 <b>RpL24</b>       | 0 0 0 1 | 1 |
| FBgn0053193 sav | FBgn0023213 <b>eIF4G</b>       | 0 0 1 0 | 1 |
| FBgn0053193 sav | FBgn0033740 <b>dgt5</b>        | 0 0 1 0 | 1 |
| FBgn0053193 sav | FBgn0034181 <b>CG8963</b>      | 0 0 1 0 | 1 |
| FBgn0053193 sav | FBgn0025700 <b>CG5885</b>      | 0 0 0 1 | 1 |
| FBgn0053193 sav | FBgn0037756 <b>CG8507</b>      | 0 0 0 1 | 1 |
| FBgn0053193 sav | FBgn0015008 <b>Actn3</b>       | 0 1 0 0 | 1 |
| FBgn0053193 sav | FBgn0038909 <b>CG6569</b>      | 0 1 0 0 | 1 |
| FBgn0053193 sav | FBgn0021847 <b>I(2)k14710</b>  | 0 0 1 0 | 1 |
| FBgn0053193 sav | FBgn0262519 <b>Mi-2</b>        | 0 0 1 0 | 1 |
| FBgn0053193 sav | FBgn0013733 <b>shot</b>        | 0 0 1 0 | 1 |
| FBgn0053193 sav | FBgn0037934 <b>CG6830</b>      | 0 0 0 1 | 1 |
| FBgn0053193 sav | FBgn0262603 <b>sec8</b>        | 0 0 0 1 | 1 |
| FBgn0053193 sav | FBgn0013576 <b>I(3)82Fd</b>    | 0 1 0 0 | 1 |
| FBgn0053193 sav | FBgn0037897 <b>CG5270</b>      | 0 0 0 1 | 1 |
| FBgn0053193 sav | FBgn0032035 <b>CG13393</b>     | 0 0 0 1 | 1 |
| FBgn0053193 sav | FBgn0013756 <b>Mtor</b>        | 0 0 1 0 | 1 |
| FBgn0053193 sav | FBgn0003274 <b>RpLP2</b>       | 0 0 0 1 | 1 |
| FBgn0053193 sav | FBgn0027571 <b>CG3523</b>      | 0 1 0 0 | 1 |
| FBgn0053193 sav | FBgn0250821 <b>CG14644</b>     | 0 1 0 0 | 1 |
| FBgn0053193 sav | FBgn0259978 <b>vlc</b>         | 0 1 0 0 | 1 |
| FBgn0053193 sav | FBgn0004583 <b>ex</b>          | 0 0 0 1 | 1 |
| FBgn0053193 sav | FBgn0004373 <b>fwd</b>         | 0 0 1 0 | 1 |
| FBgn0053193 sav | FBgn0030101 <b>CG12118</b>     | 0 0 0 1 | 1 |
| FBgn0053193 sav | FBgn0034914 <b>CG5554</b>      | 0 0 1 0 | 1 |
| FBgn0053193 sav | FBgn0261928 <b>CG42795</b>     | 0 1 0 0 | 1 |
| FBgn0053193 sav | FBgn0015218 <b>eIF-4E</b>      | 0 1 0 0 | 1 |
| FBgn0053193 sav | FBgn0024238 <b>Fim</b>         | 0 0 0 1 | 1 |
| FBgn0053193 sav | FBgn0038679 <b>CG6040</b>      | 0 1 0 0 | 1 |
| FBgn0053193 sav | FBgn0030956 <b>CG18259</b>     | 0 1 0 0 | 1 |
| FBgn0053193 sav | FBgn0033785 <b>Sans</b>        | 0 0 1 0 | 1 |
| FBgn0053193 sav | FBgn0013749 <b>Arf102F</b>     | 0 0 0 1 | 1 |
| FBgn0053193 sav | FBgn0036763 <b>CG7441</b>      | 0 0 0 1 | 1 |
| FBgn0053193 sav | FBgn0020235 <b>ATPsyn-gamn</b> | 0 0 0 1 | 1 |

## (A) entire PPIN

|                 |                        |               |     |
|-----------------|------------------------|---------------|-----|
| FBgn0053193 sav | FBgn0034654 CG10306    | 0 1 0 0       | 1   |
| FBgn0053193 sav | FBgn0037652 CG11980    | 0 0 0 1       | 1   |
| FBgn0053193 sav | FBgn0261608 RpL37A     | 0 0 0 1       | 1   |
| FBgn0053193 sav | FBgn0004838 Hrb27C     | 0 0 0 1       | 1   |
| FBgn0086384 Mer | FBgn0261397 didum      | 1 49 33 31    | 113 |
| FBgn0086384 Mer | FBgn0010246 Myo61F     | 1 34 38 34    | 106 |
| FBgn0086384 Mer | FBgn0000319 Chc        | 1 22 18 19    | 59  |
| FBgn0086384 Mer | FBgn0086347 Myo31DF    | 1 20 15 11    | 46  |
| FBgn0086384 Mer | FBgn0030086 CG7033     | 1 12 9 8      | 29  |
| FBgn0086384 Mer | FBgn0261014 TER94      | 1 12 7 7      | 26  |
| FBgn0086384 Mer | FBgn0011225 jar        | 0.99 32 18 16 | 66  |
| FBgn0086384 Mer | FBgn0037874 Tctp       | 0.99 6 5 5    | 16  |
| FBgn0086384 Mer | FBgn0016693 Past1      | 0.98 11 4 5   | 20  |
| FBgn0086384 Mer | FBgn0033663 ERp60      | 0.96 7 3 6    | 16  |
| FBgn0086384 Mer | FBgn0014163 fax        | 0.95 6 3 4    | 13  |
| FBgn0086384 Mer | FBgn0039713 RpS8       | 0.95 4 4 4    | 12  |
| FBgn0086384 Mer | FBgn0000253 Cam        | 0.94 11 7 6   | 24  |
| FBgn0086384 Mer | FBgn0000579 Eno        | 0.94 5 3 4    | 12  |
| FBgn0086384 Mer | FBgn0015795 Rab7       | 0.94 4 3 5    | 12  |
| FBgn0086384 Mer | FBgn0003231 ref(2)P    | 0.94 4 4 3    | 11  |
| FBgn0086384 Mer | FBgn0086656 shrb       | 0.93 5 5 8    | 18  |
| FBgn0086384 Mer | FBgn0086356 tum        | 0.93 6 6 5    | 17  |
| FBgn0086384 Mer | FBgn0003279 RpL4       | 0.93 6 3 4    | 13  |
| FBgn0086384 Mer | FBgn0000317 ck         | 0.92 10 5 3   | 18  |
| FBgn0086384 Mer | FBgn0024238 Fim        | 0.92 6 3 3    | 12  |
| FBgn0086384 Mer | FBgn0027329 Tcp-1zeta  | 0.88 8 7 8    | 23  |
| FBgn0086384 Mer | FBgn0020255 ran        | 0.87 6 4 4    | 14  |
| FBgn0086384 Mer | FBgn0033062 Ars2       | 0.83 5 3 5    | 13  |
| FBgn0086384 Mer | FBgn0003022 Ote        | 0.81 19 17 11 | 47  |
| FBgn0086384 Mer | FBgn0010411 RpS18      | 0.81 4 5 4    | 13  |
| FBgn0086384 Mer | FBgn0261606 RpL27A     | 0.79 5 2 3    | 10  |
| FBgn0086384 Mer | FBgn0033205 CG2064     | 0.79 3 2 3    | 8   |
| FBgn0086384 Mer | FBgn0011661 Moe        | 0.78 2 3 4    | 9   |
| FBgn0086384 Mer | FBgn0037607 CG8036     | 0.76 5 2 5    | 12  |
| FBgn0086384 Mer | FBgn0003600 Su(var)3-9 | 0.76 6 3 2    | 11  |
| FBgn0086384 Mer | FBgn0029766 CG15784    | 0.75 3 4 2    | 9   |
| FBgn0086384 Mer | FBgn0027571 CG3523     | 0.75 4 3 2    | 9   |
| FBgn0086384 Mer | FBgn0015019 Cctgamma   | 0.73 3 3 2    | 8   |
| FBgn0086384 Mer | FBgn0016700 Rab1       | 0.72 2 4 2    | 8   |
| FBgn0086384 Mer | FBgn0032444 CG5525     | 0.69 9 6 5    | 20  |
| FBgn0086384 Mer | FBgn0004907 14-3-3zeta | 0.69 4 4 3    | 11  |
| FBgn0086384 Mer | FBgn0087035 AGO2       | 0.67 11 5 12  | 28  |
| FBgn0086384 Mer | FBgn0039562 Gp93       | 0.67 4 3 4    | 11  |
| FBgn0086384 Mer | FBgn0027605 Vps4       | 0.67 7 1 3    | 11  |
| FBgn0086384 Mer | FBgn0037643 skap       | 0.67 3 3 4    | 10  |
| FBgn0086384 Mer | FBgn0004227 nonA       | 0.65 7 6 5    | 18  |
| FBgn0086384 Mer | FBgn0037632 Tcp-1eta   | 0.64 5 6 3    | 14  |
| FBgn0086384 Mer | FBgn0004432 Cyp1       | 0.64 2 3 2    | 7   |
| FBgn0086384 Mer | FBgn0015288 RpL22      | 0.61 2 2 2    | 6   |
| FBgn0086384 Mer | FBgn0035753 RpL18      | 0.61 2 2 2    | 6   |
| FBgn0086384 Mer | FBgn0001091 Gapdh1     | 0.6 2 3 1     | 6   |

## (A) entire PPIN

|             |     |             |             |      |         |    |
|-------------|-----|-------------|-------------|------|---------|----|
| FBgn0086384 | Mer | FBgn0261592 | RpS6        | 0.59 | 3 1 2   | 6  |
| FBgn0086384 | Mer | FBgn0033342 | CG8258      | 0.57 | 6 2 1   | 9  |
| FBgn0086384 | Mer | FBgn0017545 | RpS3A       | 0.56 | 6 4 5   | 15 |
| FBgn0086384 | Mer | FBgn0027084 | Aats-lys    | 0.55 | 4 2 1   | 7  |
| FBgn0086384 | Mer | FBgn0024814 | C1c         | 0.55 | 3 1 2   | 6  |
| FBgn0086384 | Mer | FBgn0010348 | Arf79F      | 0.52 | 4 3 2   | 9  |
| FBgn0086384 | Mer | FBgn0263594 | lost        | 0.51 | 3 2 2   | 7  |
| FBgn0086384 | Mer | FBgn0033902 | Tango7      | 0.51 | 1 2 2   | 5  |
| FBgn0086384 | Mer | FBgn0026372 | RpL23A      | 0.51 | 1 2 2   | 5  |
| FBgn0086384 | Mer | FBgn0030993 | Mec2        | 0.5  | 7 6 7   | 20 |
| FBgn0086384 | Mer | FBgn0000308 | chic        | 0.5  | 2 1 3   | 6  |
| FBgn0086384 | Mer | FBgn0037270 | CG9769      | 0.47 | 2 1 2   | 5  |
| FBgn0086384 | Mer | FBgn0030956 | CG18259     | 0.45 | 1 3 1   | 5  |
| FBgn0086384 | Mer | FBgn0003517 | sta         | 0.45 | 1 2 2   | 5  |
| FBgn0086384 | Mer | FBgn0032987 | RpL21       | 0.45 | 1 2 1   | 4  |
| FBgn0086384 | Mer | FBgn0034138 | RpS15       | 0.43 | 3 1 1   | 5  |
| FBgn0086384 | Mer | FBgn0028685 | Rpt4        | 0.4  | 2 2 1   | 5  |
| FBgn0086384 | Mer | FBgn0262735 | Imp         | 0.4  | 1 2 1   | 4  |
| FBgn0086384 | Mer | FBgn0261551 | CG42669     | 0.39 | 8 2 1   | 11 |
| FBgn0086384 | Mer | FBgn0037551 | Gie         | 0.39 | 2 1 1   | 4  |
| FBgn0086384 | Mer | FBgn0040007 | RpL38       | 0.39 | 1 2 1   | 4  |
| FBgn0086384 | Mer | FBgn0001215 | Hrb98DE     | 0.38 | 4 6 6   | 16 |
| FBgn0086384 | Mer | FBgn0010621 | Cct5        | 0.38 | 4 1 3   | 8  |
| FBgn0086384 | Mer | FBgn0015790 | Rab11       | 0.38 | 1 2 1   | 4  |
| FBgn0086384 | Mer | FBgn0024556 | EftuM       | 0.37 | 4 3 2   | 9  |
| FBgn0086384 | Mer | FBgn0020236 | ATPCL       | 0.35 | 2 1 1   | 4  |
| FBgn0086384 | Mer | FBgn0029897 | RpL17       | 0.35 | 3 0 1   | 4  |
| FBgn0086384 | Mer | FBgn0011692 | pav         | 0.32 | 10 8 6  | 24 |
| FBgn0086384 | Mer | FBgn0011272 | RpL13       | 0.26 | 0 1 2   | 3  |
| FBgn0086384 | Mer | FBgn0037719 | bocksbeutel | 0.25 | 6 3 3   | 12 |
| FBgn0086384 | Mer | FBgn0035147 | Gale        | 0.24 | 1 2 0   | 3  |
| FBgn0086384 | Mer | FBgn0003261 | Rm62        | 0.23 | 12 6 7  | 25 |
| FBgn0086384 | Mer | FBgn0000559 | Ef2b        | 0.21 | 8 10 15 | 33 |
| FBgn0086384 | Mer | FBgn0033912 | RpS23       | 0.21 | 0 2 0   | 2  |
| FBgn0086384 | Mer | FBgn0011016 | SsRbeta     | 0.2  | 2 1 1   | 4  |
| FBgn0086384 | Mer | FBgn0038369 | Arpc3A      | 0.2  | 2 1 1   | 4  |
| FBgn0086384 | Mer | FBgn0004167 | kst         | 0.19 | 8 3 2   | 13 |
| FBgn0086384 | Mer | FBgn0032518 | RpL24       | 0.19 | 3 2 2   | 7  |
| FBgn0086384 | Mer | FBgn0023143 | Uba1        | 0.18 | 2 1 2   | 5  |
| FBgn0086384 | Mer | FBgn0004378 | Klp61F      | 0.18 | 2 0 0   | 2  |
| FBgn0086384 | Mer | FBgn0028734 | Fmr1        | 0.17 | 7 6 5   | 18 |
| FBgn0086384 | Mer | FBgn0014869 | Pglym78     | 0.17 | 2 0 0   | 2  |
| FBgn0086384 | Mer | FBgn0015268 | Nap1        | 0.16 | 3 2 3   | 8  |
| FBgn0086384 | Mer | FBgn0027094 | Aats-ala    | 0.16 | 2 0 2   | 4  |
| FBgn0086384 | Mer | FBgn0002466 | sti         | 0.14 | 2 2 2   | 6  |
| FBgn0086384 | Mer | FBgn0032198 | eEF1delta   | 0.14 | 2 0 0   | 2  |
| FBgn0086384 | Mer | FBgn0033109 | coro        | 0.13 | 1 2 0   | 3  |
| FBgn0086384 | Mer | FBgn0250906 | Pgk         | 0.13 | 2 0 0   | 2  |
| FBgn0086384 | Mer | FBgn0035589 | CHMP2B      | 0.12 | 2 3 4   | 9  |
| FBgn0086384 | Mer | FBgn0261385 | scra        | 0.12 | 2 2 1   | 5  |
| FBgn0086384 | Mer | FBgn0037249 | eIF3-S10    | 0.12 | 1 1 2   | 4  |

## (A) entire PPIN

|             |            |             |                     |             |             |     |
|-------------|------------|-------------|---------------------|-------------|-------------|-----|
| FBgn0086384 | <b>Mer</b> | FBgn0002780 | <b>mod</b>          | <b>0.1</b>  | 9 2 5       | 16  |
| FBgn0086384 | <b>Mer</b> | FBgn0011726 | <b>tsr</b>          | <b>0.1</b>  | 4 2 1       | 7   |
| FBgn0086384 | <b>Mer</b> | FBgn0010516 | <b>wal</b>          | <b>0.1</b>  | 2 2 1       | 5   |
| FBgn0086384 | <b>Mer</b> | FBgn0262716 | <b>Arp66B</b>       | <b>0.09</b> | 6 6 4       | 16  |
| FBgn0086384 | <b>Mer</b> | FBgn0035811 | <b>CG12262</b>      | <b>0.08</b> | 2 2 0       | 4   |
| FBgn0086384 | <b>Mer</b> | FBgn0005533 | <b>RpS17</b>        | <b>0.07</b> | 1 2 2       | 5   |
| FBgn0086384 | <b>Mer</b> | FBgn0053868 | <b>His2B:CG3386</b> | <b>0.06</b> | 2 1 2       | 5   |
| FBgn0086384 | <b>Mer</b> | FBgn0020910 | <b>RpL3</b>         | <b>0.06</b> | 2 1 1       | 4   |
| FBgn0086384 | <b>Mer</b> | FBgn0064225 | <b>RpL5</b>         | <b>0.06</b> | 2 0 1       | 3   |
| FBgn0086384 | <b>Mer</b> | FBgn0032731 | <b>CG10641</b>      | <b>0.05</b> | 5 6 3       | 14  |
| FBgn0086384 | <b>Mer</b> | FBgn0086710 | <b>RpL30</b>        | <b>0.05</b> | 2 2 2       | 6   |
| FBgn0086384 | <b>Mer</b> | FBgn0263006 | <b>Ca-P60A</b>      | <b>0.05</b> | 1 1 2       | 4   |
| FBgn0086384 | <b>Mer</b> | FBgn0263396 | <b>sqd</b>          | <b>0.04</b> | 5 5 7       | 17  |
| FBgn0086384 | <b>Mer</b> | FBgn0019936 | <b>RpS20</b>        | <b>0.04</b> | 5 2 3       | 10  |
| FBgn0086384 | <b>Mer</b> | FBgn0011640 | <b>lark</b>         | <b>0.04</b> | 2 0 0       | 2   |
| FBgn0086384 | <b>Mer</b> | FBgn0004888 | <b>Scsalpha</b>     | <b>0.03</b> | 6 5 4       | 15  |
| FBgn0086384 | <b>Mer</b> | FBgn0013981 | <b>His4r</b>        | <b>0.03</b> | 3 1 2       | 6   |
| FBgn0086384 | <b>Mer</b> | FBgn0010265 | <b>RpS13</b>        | <b>0.03</b> | 2 1 2       | 5   |
| FBgn0086384 | <b>Mer</b> | FBgn0022959 | <b>yps</b>          | <b>0.03</b> | 1 2 1       | 4   |
| FBgn0086384 | <b>Mer</b> | FBgn0031437 | <b>p16-ARC</b>      | <b>0.02</b> | 4 2 2       | 8   |
| FBgn0086384 | <b>Mer</b> | FBgn0010078 | <b>RpL23</b>        | <b>0.01</b> | 5 5 6       | 16  |
| FBgn0086384 | <b>Mer</b> | FBgn0000173 | <b>ben</b>          | <b>0.01</b> | 2 2 3       | 7   |
| FBgn0086384 | <b>Mer</b> | FBgn0015756 | <b>RpL9</b>         | <b>0.01</b> | 2 4 1       | 7   |
| FBgn0086384 | <b>Mer</b> | FBgn0013269 | <b>FK506-bp1</b>    | <b>0.01</b> | 1 1 2       | 4   |
| FBgn0086384 | <b>Mer</b> | FBgn0035872 | <b>CG7185</b>       | <b>0.01</b> | 3 0 1       | 4   |
| FBgn0086384 | <b>Mer</b> | FBgn0020618 | <b>Rack1</b>        | <b>0.01</b> | 1 2 0       | 3   |
| FBgn0086384 | <b>Mer</b> | FBgn0005634 | <b>zip</b>          | <b>0</b>    | 335 277 278 | 890 |
| FBgn0086384 | <b>Mer</b> | FBgn0000042 | <b>Act5C</b>        | <b>0</b>    | 42 35 32    | 109 |
| FBgn0086384 | <b>Mer</b> | FBgn0000556 | <b>Ef1alpha48D</b>  | <b>0</b>    | 38 34 33    | 105 |
| FBgn0086384 | <b>Mer</b> | FBgn0003721 | <b>Tm1</b>          | <b>0</b>    | 33 28 27    | 88  |
| FBgn0086384 | <b>Mer</b> | FBgn0002525 | <b>Lam</b>          | <b>0</b>    | 36 25 24    | 85  |
| FBgn0086384 | <b>Mer</b> | FBgn0000709 | <b>filil</b>        | <b>0</b>    | 29 26 23    | 78  |
| FBgn0086384 | <b>Mer</b> | FBgn0001219 | <b>Hsc70-4</b>      | <b>0</b>    | 26 23 23    | 72  |
| FBgn0086384 | <b>Mer</b> | FBgn0001233 | <b>Hsp83</b>        | <b>0</b>    | 25 20 23    | 68  |
| FBgn0086384 | <b>Mer</b> | FBgn0003884 | <b>alphaTub84B</b>  | <b>0</b>    | 21 16 20    | 57  |
| FBgn0086384 | <b>Mer</b> | FBgn0261710 | <b>nocte</b>        | <b>0</b>    | 26 14 17    | 57  |
| FBgn0086384 | <b>Mer</b> | FBgn0003887 | <b>betaTub56D</b>   | <b>0</b>    | 22 17 18    | 57  |
| FBgn0086384 | <b>Mer</b> | FBgn0030699 | <b>CG8578</b>       | <b>0</b>    | 18 17 18    | 53  |
| FBgn0086384 | <b>Mer</b> | FBgn0003178 | <b>PyK</b>          | <b>0</b>    | 17 16 16    | 49  |
| FBgn0086384 | <b>Mer</b> | FBgn0004687 | <b>Mlc-c</b>        | <b>0</b>    | 17 12 13    | 42  |
| FBgn0086384 | <b>Mer</b> | FBgn0250789 | <b>alpha-Spec</b>   | <b>0</b>    | 20 12 8     | 40  |
| FBgn0086384 | <b>Mer</b> | FBgn0263231 | <b>bel</b>          | <b>0</b>    | 13 12 15    | 40  |
| FBgn0086384 | <b>Mer</b> | FBgn0001218 | <b>Hsc70-3</b>      | <b>0</b>    | 13 13 13    | 39  |
| FBgn0086384 | <b>Mer</b> | FBgn0003514 | <b>sqh</b>          | <b>0</b>    | 10 10 7     | 27  |
| FBgn0086384 | <b>Mer</b> | FBgn0039757 | <b>RpS7</b>         | <b>0</b>    | 10 10 7     | 27  |
| FBgn0086384 | <b>Mer</b> | FBgn0015778 | <b>rin</b>          | <b>0</b>    | 10 8 7      | 25  |
| FBgn0086384 | <b>Mer</b> | FBgn0082582 | <b>tmod</b>         | <b>0</b>    | 11 5 8      | 24  |
| FBgn0086384 | <b>Mer</b> | FBgn0261619 | <b>pAbp</b>         | <b>0</b>    | 11 7 5      | 23  |
| FBgn0086384 | <b>Mer</b> | FBgn0003360 | <b>sesB</b>         | <b>0</b>    | 9 5 8       | 22  |
| FBgn0086384 | <b>Mer</b> | FBgn0034577 | <b>cpa</b>          | <b>0</b>    | 10 7 5      | 22  |
| FBgn0086384 | <b>Mer</b> | FBgn0031977 | <b>baf</b>          | <b>0</b>    | 8 5 8       | 21  |

## (A) entire PPIN

|             |     |             |                      |         |    |
|-------------|-----|-------------|----------------------|---------|----|
| FBgn0086384 | Mer | FBgn0037891 | <b>CG5214</b>        | 0 9 6 5 | 20 |
| FBgn0086384 | Mer | FBgn0011211 | <b>blw</b>           | 0 7 6 6 | 19 |
| FBgn0086384 | Mer | FBgn0003676 | <b>T-cp1</b>         | 0 6 6 6 | 18 |
| FBgn0086384 | Mer | FBgn0000044 | <b>Act57B</b>        | 0 9 5 4 | 18 |
| FBgn0086384 | Mer | FBgn0011284 | <b>RpS4</b>          | 0 6 5 7 | 18 |
| FBgn0086384 | Mer | FBgn0029176 | <b>Ef1gamma</b>      | 0 7 5 5 | 17 |
| FBgn0086384 | Mer | FBgn0034743 | <b>RpS16</b>         | 0 6 5 5 | 16 |
| FBgn0086384 | Mer | FBgn0002645 | <b>Map205</b>        | 0 8 5 3 | 16 |
| FBgn0086384 | Mer | FBgn0032859 | <b>Arc-p34</b>       | 0 6 6 3 | 15 |
| FBgn0086384 | Mer | FBgn0004403 | <b>RpS14a</b>        | 0 6 4 5 | 15 |
| FBgn0086384 | Mer | FBgn0039697 | <b>CG7834</b>        | 0 5 5 4 | 14 |
| FBgn0086384 | Mer | FBgn0031256 | <b>CG4164</b>        | 0 4 4 6 | 14 |
| FBgn0086384 | Mer | FBgn0262734 | <b>Rbp2</b>          | 0 5 4 5 | 14 |
| FBgn0086384 | Mer | FBgn0036213 | <b>RpL10Ab</b>       | 0 6 4 4 | 14 |
| FBgn0086384 | Mer | FBgn0020238 | <b>14-3-3epsilon</b> | 0 3 5 5 | 13 |
| FBgn0086384 | Mer | FBgn0038145 | <b>Droj2</b>         | 0 4 6 3 | 13 |
| FBgn0086384 | Mer | FBgn0001216 | <b>Hsc70-1</b>       | 0 5 4 4 | 13 |
| FBgn0086384 | Mer | FBgn0001942 | <b>eIF-4a</b>        | 0 4 4 5 | 13 |
| FBgn0086384 | Mer | FBgn0035499 | <b>Chd64</b>         | 0 5 3 4 | 12 |
| FBgn0086384 | Mer | FBgn0004237 | <b>Hrb87F</b>        | 0 6 3 3 | 12 |
| FBgn0086384 | Mer | FBgn0035608 | <b>blanks</b>        | 0 3 4 4 | 11 |
| FBgn0086384 | Mer | FBgn0003888 | <b>betaTub60D</b>    | 0 4 3 4 | 11 |
| FBgn0086384 | Mer | FBgn0042134 | <b>Capr</b>          | 0 5 2 4 | 11 |
| FBgn0086384 | Mer | FBgn0001961 | <b>Sop2</b>          | 0 5 3 3 | 11 |
| FBgn0086384 | Mer | FBgn0001220 | <b>Hsc70-5</b>       | 0 3 4 4 | 11 |
| FBgn0086384 | Mer | FBgn0010198 | <b>RpS15Aa</b>       | 0 4 4 3 | 11 |
| FBgn0086384 | Mer | FBgn0011570 | <b>cpb</b>           | 0 5 3 3 | 11 |
| FBgn0086384 | Mer | FBgn0015834 | <b>Trip1</b>         | 0 5 3 2 | 10 |
| FBgn0086384 | Mer | FBgn0029979 | <b>CG10777</b>       | 0 3 3 4 | 10 |
| FBgn0086384 | Mer | FBgn0000258 | <b>CkIIalpha</b>     | 0 3 3 4 | 10 |
| FBgn0086384 | Mer | FBgn0003890 | <b>betaTub97EF</b>   | 0 3 3 3 | 9  |
| FBgn0086384 | Mer | FBgn0004867 | <b>RpS2</b>          | 0 3 4 2 | 9  |
| FBgn0086384 | Mer | FBgn0261593 | <b>RpS10b</b>        | 0 3 3 2 | 8  |
| FBgn0086384 | Mer | FBgn0011742 | <b>Arp14D</b>        | 0 3 3 2 | 8  |
| FBgn0086384 | Mer | FBgn0027066 | <b>Eb1</b>           | 0 3 3 2 | 8  |
| FBgn0086384 | Mer | FBgn0027932 | <b>Akap200</b>       | 0 4 2 2 | 8  |
| FBgn0086384 | Mer | FBgn0040227 | <b>eIF-3p66</b>      | 0 4 2 2 | 8  |
| FBgn0086384 | Mer | FBgn0014189 | <b>Hel25E</b>        | 0 3 1 3 | 7  |
| FBgn0086384 | Mer | FBgn0029093 | <b>cathD</b>         | 0 3 2 2 | 7  |
| FBgn0086384 | Mer | FBgn0086904 | <b>Nacalalpha</b>    | 0 2 3 2 | 7  |
| FBgn0086384 | Mer | FBgn0031781 | <b>Arc-p20</b>       | 0 3 2 2 | 7  |
| FBgn0086384 | Mer | FBgn0002622 | <b>RpS3</b>          | 0 4 2 1 | 7  |
| FBgn0086384 | Mer | FBgn0028737 | <b>Ef1beta</b>       | 0 4 1 1 | 6  |
| FBgn0086384 | Mer | FBgn0000181 | <b>bic</b>           | 0 3 1 2 | 6  |
| FBgn0086384 | Mer | FBgn0001217 | <b>Hsc70-2</b>       | 0 2 2 2 | 6  |
| FBgn0086384 | Mer | FBgn0034968 | <b>RpL12</b>         | 0 2 2 2 | 6  |
| FBgn0086384 | Mer | FBgn0010408 | <b>RpS9</b>          | 0 2 2 2 | 6  |
| FBgn0086384 | Mer | FBgn0261609 | <b>eIF-2alpha</b>    | 0 2 2 2 | 6  |
| FBgn0086384 | Mer | FBgn0028327 | <b>I(1)G0320</b>     | 0 2 2 2 | 6  |
| FBgn0086384 | Mer | FBgn0003941 | <b>RpL40</b>         | 0 3 1 1 | 5  |
| FBgn0086384 | Mer | FBgn0000497 | <b>ds</b>            | 0 2 1 2 | 5  |

## (A) entire PPIN

|             |     |             |             |         |   |
|-------------|-----|-------------|-------------|---------|---|
| FBgn0086384 | Mer | FBgn0025286 | RpL31       | 0 2 1 1 | 4 |
| FBgn0086384 | Mer | FBgn0041180 | TepIV       | 0 2 1 1 | 4 |
| FBgn0086384 | Mer | FBgn0010217 | ATPsyn-beta | 0 3 1 0 | 4 |
| FBgn0086384 | Mer | FBgn0261456 | hpo         | 0 3 0 1 | 4 |
| FBgn0086384 | Mer | FBgn0250814 | CG4169      | 0 2 1 1 | 4 |
| FBgn0086384 | Mer | FBgn0263391 | hts         | 0 1 1 2 | 4 |
| FBgn0086384 | Mer | FBgn0011710 | Sep1        | 0 2 1 1 | 4 |
| FBgn0086384 | Mer | FBgn0039359 | RpL27       | 0 1 1 1 | 3 |
| FBgn0086384 | Mer | FBgn0035987 | CG3689      | 0 1 1 1 | 3 |
| FBgn0086384 | Mer | FBgn0261596 | RpS24       | 0 1 1 1 | 3 |
| FBgn0086384 | Mer | FBgn0027494 | RpS10a      | 0 1 1 1 | 3 |
| FBgn0086384 | Mer | FBgn0028470 | Patr-1      | 0 1 1 1 | 3 |
| FBgn0086384 | Mer | FBgn0001197 | His2Av      | 0 1 1 1 | 3 |
| FBgn0086384 | Mer | FBgn0010333 | Rac1        | 0 1 1 1 | 3 |
| FBgn0086384 | Mer | FBgn0029118 | Sucb        | 0 1 1 1 | 3 |
| FBgn0086384 | Mer | FBgn0026761 | Trap1       | 0 1 1 1 | 3 |
| FBgn0086384 | Mer | FBgn0014391 | sun         | 0 1 1 1 | 3 |
| FBgn0086384 | Mer | FBgn0031066 | CG14235     | 0 1 1 1 | 3 |
| FBgn0086384 | Mer | FBgn0028687 | Rpt1        | 0 1 1 1 | 3 |
| FBgn0086384 | Mer | FBgn0028695 | Rpn1        | 0 1 1 1 | 3 |
| FBgn0086384 | Mer | FBgn0001092 | Gapdh2      | 0 1 1 1 | 3 |
| FBgn0086384 | Mer | FBgn0035229 | CG7852      | 0 1 1 1 | 3 |
| FBgn0086384 | Mer | FBgn0030747 | CG4301      | 0 1 1 1 | 3 |
| FBgn0086384 | Mer | FBgn0002579 | RpL36       | 0 1 1 1 | 3 |
| FBgn0086384 | Mer | FBgn0029687 | Vap-33-1    | 0 1 1 1 | 3 |
| FBgn0086384 | Mer | FBgn0003274 | RpLP2       | 0 0 1 2 | 3 |
| FBgn0086384 | Mer | FBgn0005585 | Crc         | 0 1 1 1 | 3 |
| FBgn0086384 | Mer | FBgn0261597 | RpS26       | 0 1 1 1 | 3 |
| FBgn0086384 | Mer | FBgn0013325 | RpL11       | 0 1 1 1 | 3 |
| FBgn0086384 | Mer | FBgn0020235 | ATPsyn-gamn | 0 1 1 1 | 3 |
| FBgn0086384 | Mer | FBgn0034398 | CG15098     | 0 1 1 1 | 3 |
| FBgn0086384 | Mer | FBgn0038476 | kuk         | 0 1 0 1 | 2 |
| FBgn0086384 | Mer | FBgn0029823 | CG3011      | 0 0 1 1 | 2 |
| FBgn0086384 | Mer | FBgn0037537 | CG2767      | 0 1 0 1 | 2 |
| FBgn0086384 | Mer | FBgn0020279 | lig         | 0 1 0 1 | 2 |
| FBgn0086384 | Mer | FBgn0053303 | CG33303     | 0 1 0 1 | 2 |
| FBgn0086384 | Mer | FBgn0001075 | ft          | 0 0 1 1 | 2 |
| FBgn0086384 | Mer | FBgn0010342 | Map60       | 0 1 1 0 | 2 |
| FBgn0086384 | Mer | FBgn0034075 | Asph        | 0 1 1 0 | 2 |
| FBgn0086384 | Mer | FBgn0024987 | ssx         | 0 1 1 0 | 2 |
| FBgn0086384 | Mer | FBgn0029785 | RpL35       | 0 0 1 1 | 2 |
| FBgn0086384 | Mer | FBgn0024183 | vig         | 0 1 0 1 | 2 |
| FBgn0086384 | Mer | FBgn0027598 | cindr       | 0 0 1 1 | 2 |
| FBgn0086384 | Mer | FBgn0032010 | CG8086      | 0 1 1 0 | 2 |
| FBgn0086384 | Mer | FBgn0023517 | Pgam5       | 0 1 1 0 | 2 |
| FBgn0086384 | Mer | FBgn0038805 | TFAM        | 0 1 1 0 | 2 |
| FBgn0086384 | Mer | FBgn0028697 | RpL15       | 0 1 1 0 | 2 |
| FBgn0086384 | Mer | FBgn0036300 | CG10688     | 0 1 0 1 | 2 |
| FBgn0086384 | Mer | FBgn0011823 | Pen         | 0 1 1 0 | 2 |
| FBgn0086384 | Mer | FBgn0041205 | key         | 0 1 0 1 | 2 |
| FBgn0086384 | Mer | FBgn0000100 | RpLP0       | 0 2 0 0 | 2 |



## (A) entire PPIN

|             |     |             |            |   |       |   |
|-------------|-----|-------------|------------|---|-------|---|
| FBgn0086384 | Mer | FBgn0010409 | RpL18A     | 0 | 1 0 1 | 2 |
| FBgn0086384 | Mer | FBgn0036929 | CG7668     | 0 | 1 0 1 | 2 |
| FBgn0086384 | Mer | FBgn0021795 | Tapdelta   | 0 | 1 0 1 | 2 |
| FBgn0086384 | Mer | FBgn0027616 | YT521-B    | 0 | 1 0 1 | 2 |
| FBgn0086384 | Mer | FBgn0262601 | SmB        | 0 | 1 0 1 | 2 |
| FBgn0086384 | Mer | FBgn0025725 | alphaCop   | 0 | 2 0 0 | 2 |
| FBgn0086384 | Mer | FBgn0261599 | RpS29      | 0 | 0 1 1 | 2 |
| FBgn0086384 | Mer | FBgn0260439 | Pp2A-29B   | 0 | 0 1 1 | 2 |
| FBgn0086384 | Mer | FBgn0014029 | Sep2       | 0 | 1 1 0 | 2 |
| FBgn0086384 | Mer | FBgn0013770 | Cp1        | 0 | 1 0 1 | 2 |
| FBgn0086384 | Mer | FBgn0037351 | RpL13A     | 0 | 1 1 0 | 2 |
| FBgn0086384 | Mer | FBgn0027338 | Kap-alpha3 | 0 | 0 1 1 | 2 |
| FBgn0086384 | Mer | FBgn0031459 | CG2862     | 0 | 0 1 1 | 2 |
| FBgn0086384 | Mer | FBgn0033204 | CG2065     | 0 | 1 1 0 | 2 |
| FBgn0086384 | Mer | FBgn0041775 | tral       | 0 | 1 0 1 | 2 |
| FBgn0086384 | Mer | FBgn0013726 | pnut       | 0 | 1 1 0 | 2 |
| FBgn0086384 | Mer | FBgn0023167 | SmD3       | 0 | 1 0 1 | 2 |
| FBgn0086384 | Mer | FBgn0015218 | eIF-4E     | 0 | 1 1 0 | 2 |
| FBgn0086384 | Mer | FBgn0033101 | CG9436     | 0 | 1 0 1 | 2 |
| FBgn0086384 | Mer | FBgn0086472 | RpS25      | 0 | 0 1 1 | 2 |
| FBgn0086384 | Mer | FBgn0017579 | RpL14      | 0 | 1 0 1 | 2 |
| FBgn0086384 | Mer | FBgn0014010 | Rab5       | 0 | 0 1 1 | 2 |
| FBgn0086384 | Mer | FBgn0005593 | RpL7       | 0 | 1 0 1 | 2 |
| FBgn0086384 | Mer | FBgn0261723 | Dbx        | 0 | 1 0 1 | 2 |
| FBgn0086384 | Mer | FBgn0029092 | ced-6      | 0 | 1 1 0 | 2 |
| FBgn0086384 | Mer | FBgn0002607 | RpL19      | 0 | 1 1 0 | 2 |
| FBgn0086384 | Mer | FBgn0004838 | Hrb27C     | 0 | 2 0 0 | 2 |
| FBgn0086384 | Mer | FBgn0028969 | deltaCOP   | 0 | 1 0 1 | 2 |
| FBgn0086384 | Mer | FBgn0039129 | RpS19b     | 0 | 0 0 1 | 1 |
| FBgn0086384 | Mer | FBgn0034401 | CG15100    | 0 | 0 0 1 | 1 |
| FBgn0086384 | Mer | FBgn0026597 | Axn        | 0 | 1 0 0 | 1 |
| FBgn0086384 | Mer | FBgn0261258 | rgn        | 0 | 0 0 1 | 1 |
| FBgn0086384 | Mer | FBgn0000578 | ena        | 0 | 1 0 0 | 1 |
| FBgn0086384 | Mer | FBgn0039300 | RpS27      | 0 | 0 0 1 | 1 |
| FBgn0086384 | Mer | FBgn0021906 | RFesP      | 0 | 1 0 0 | 1 |
| FBgn0086384 | Mer | FBgn0003660 | Syb        | 0 | 0 0 1 | 1 |
| FBgn0086384 | Mer | FBgn0015589 | Apc        | 0 | 1 0 0 | 1 |
| FBgn0086384 | Mer | FBgn0027783 | SMC2       | 0 | 0 1 0 | 1 |
| FBgn0086384 | Mer | FBgn0004556 | Dbp73D     | 0 | 0 0 1 | 1 |
| FBgn0086384 | Mer | FBgn0263510 | nclb       | 0 | 1 0 0 | 1 |
| FBgn0086384 | Mer | FBgn0039463 | CG18472    | 0 | 0 1 0 | 1 |
| FBgn0086384 | Mer | FBgn0022023 | eIF-3p40   | 0 | 1 0 0 | 1 |
| FBgn0086384 | Mer | FBgn0050493 | CG30493    | 0 | 1 0 0 | 1 |
| FBgn0086384 | Mer | FBgn0003892 | ptc        | 0 | 0 0 1 | 1 |
| FBgn0086384 | Mer | FBgn0034970 | yki        | 0 | 0 0 1 | 1 |
| FBgn0086384 | Mer | FBgn0263598 | Vha68-2    | 0 | 1 0 0 | 1 |
| FBgn0086384 | Mer | FBgn0033203 | CG2070     | 0 | 1 0 0 | 1 |
| FBgn0086384 | Mer | FBgn0039629 | CG11842    | 0 | 0 1 0 | 1 |
| FBgn0086384 | Mer | FBgn0036805 | Chmp1      | 0 | 0 1 0 | 1 |
| FBgn0086384 | Mer | FBgn0038830 | CG17272    | 0 | 1 0 0 | 1 |
| FBgn0086384 | Mer | FBgn0027547 | CG1927     | 0 | 0 0 1 | 1 |

## (A) entire PPIN

|             |            |             |                    |         |   |
|-------------|------------|-------------|--------------------|---------|---|
| FBgn0086384 | <b>Mer</b> | FBgn0029962 | <b>CG1402</b>      | 0 1 0 0 | 1 |
| FBgn0086384 | <b>Mer</b> | FBgn0039478 | <b>Nep5</b>        | 0 0 1 0 | 1 |
| FBgn0086384 | <b>Mer</b> | FBgn0035632 | <b>Ppat-Dpck</b>   | 0 1 0 0 | 1 |
| FBgn0086384 | <b>Mer</b> | FBgn0262518 | <b>Rab8</b>        | 0 1 0 0 | 1 |
| FBgn0086384 | <b>Mer</b> | FBgn0005674 | <b>Aats-glupro</b> | 0 1 0 0 | 1 |
| FBgn0086384 | <b>Mer</b> | FBgn0037664 | <b>CG8420</b>      | 0 1 0 0 | 1 |
| FBgn0086384 | <b>Mer</b> | FBgn0052082 | <b>CG32082</b>     | 0 0 1 0 | 1 |
| FBgn0086384 | <b>Mer</b> | FBgn0036018 | <b>CG3335</b>      | 0 1 0 0 | 1 |
| FBgn0086384 | <b>Mer</b> | FBgn0046214 | <b>vig2</b>        | 0 1 0 0 | 1 |
| FBgn0086384 | <b>Mer</b> | FBgn0050122 | <b>CG30122</b>     | 0 1 0 0 | 1 |
| FBgn0086384 | <b>Mer</b> | FBgn0030588 | <b>CG9521</b>      | 0 0 0 1 | 1 |
| FBgn0086384 | <b>Mer</b> | FBgn0034259 | <b>CG6459</b>      | 0 0 0 1 | 1 |
| FBgn0086384 | <b>Mer</b> | FBgn0086377 | <b>Syx7</b>        | 0 1 0 0 | 1 |
| FBgn0086384 | <b>Mer</b> | FBgn0024222 | <b>ird5</b>        | 0 1 0 0 | 1 |
| FBgn0086384 | <b>Mer</b> | FBgn0028684 | <b>Tbp-1</b>       | 0 0 1 0 | 1 |
| FBgn0086384 | <b>Mer</b> | FBgn0034967 | <b>eIF-5A</b>      | 0 1 0 0 | 1 |
| FBgn0086384 | <b>Mer</b> | FBgn0036258 | <b>CG5642</b>      | 0 1 0 0 | 1 |
| FBgn0086384 | <b>Mer</b> | FBgn0002593 | <b>RpLP1</b>       | 0 0 0 1 | 1 |
| FBgn0086384 | <b>Mer</b> | FBgn0037046 | <b>CG10581</b>     | 0 0 1 0 | 1 |
| FBgn0086384 | <b>Mer</b> | FBgn0031251 | <b>CG4213</b>      | 0 1 0 0 | 1 |
| FBgn0086384 | <b>Mer</b> | FBgn0027081 | <b>Aats-thr</b>    | 0 0 1 0 | 1 |
| FBgn0086384 | <b>Mer</b> | FBgn0017551 | <b>Rca1</b>        | 0 0 0 1 | 1 |
| FBgn0086384 | <b>Mer</b> | FBgn0036892 | <b>CG8798</b>      | 0 1 0 0 | 1 |
| FBgn0086384 | <b>Mer</b> | FBgn0032454 | <b>CG5787</b>      | 0 1 0 0 | 1 |
| FBgn0086384 | <b>Mer</b> | FBgn0033699 | <b>RpS11</b>       | 0 1 0 0 | 1 |
| FBgn0086384 | <b>Mer</b> | FBgn0034435 | <b>CG9975</b>      | 0 0 1 0 | 1 |
| FBgn0086384 | <b>Mer</b> | FBgn0051465 | <b>CG31465</b>     | 0 0 1 0 | 1 |
| FBgn0086384 | <b>Mer</b> | FBgn0036302 | <b>sowah</b>       | 0 0 0 1 | 1 |
| FBgn0086384 | <b>Mer</b> | FBgn0263355 | <b>CG31688</b>     | 0 0 1 0 | 1 |
| FBgn0086384 | <b>Mer</b> | FBgn0086610 | <b>CG33342</b>     | 0 1 0 0 | 1 |
| FBgn0086384 | <b>Mer</b> | FBgn0002440 | <b>l(3)mbn</b>     | 0 1 0 0 | 1 |
| FBgn0086384 | <b>Mer</b> | FBgn0005648 | <b>Pabp2</b>       | 0 1 0 0 | 1 |
| FBgn0086384 | <b>Mer</b> | FBgn0263347 | <b>Caf1</b>        | 0 0 1 0 | 1 |
| FBgn0086384 | <b>Mer</b> | FBgn0023521 | <b>CG3587</b>      | 0 1 0 0 | 1 |
| FBgn0086384 | <b>Mer</b> | FBgn0010747 | <b>Srp54k</b>      | 0 0 0 1 | 1 |
| FBgn0086384 | <b>Mer</b> | FBgn0037515 | <b>Sp7</b>         | 0 0 1 0 | 1 |
| FBgn0086384 | <b>Mer</b> | FBgn0013813 | <b>Dhc98D</b>      | 0 0 0 1 | 1 |
| FBgn0086384 | <b>Mer</b> | FBgn0052016 | <b>CG32016</b>     | 0 0 0 1 | 1 |
| FBgn0086384 | <b>Mer</b> | FBgn0087013 | <b>Karybeta3</b>   | 0 1 0 0 | 1 |
| FBgn0086384 | <b>Mer</b> | FBgn0015282 | <b>Pros26.4</b>    | 0 1 0 0 | 1 |
| FBgn0086384 | <b>Mer</b> | FBgn0037445 | <b>CG9727</b>      | 0 1 0 0 | 1 |
| FBgn0086384 | <b>Mer</b> | FBgn0030136 | <b>RpS28b</b>      | 0 1 0 0 | 1 |
| FBgn0086384 | <b>Mer</b> | FBgn0022063 | <b>Pcf11</b>       | 0 0 0 1 | 1 |
| FBgn0086384 | <b>Mer</b> | FBgn0086355 | <b>Tpi</b>         | 0 0 1 0 | 1 |
| FBgn0086384 | <b>Mer</b> | FBgn0003206 | <b>Ras64B</b>      | 0 1 0 0 | 1 |
| FBgn0086384 | <b>Mer</b> | FBgn0026563 | <b>CG1979</b>      | 0 0 1 0 | 1 |
| FBgn0086384 | <b>Mer</b> | FBgn0051370 | <b>CG31370</b>     | 0 0 0 1 | 1 |
| FBgn0086384 | <b>Mer</b> | FBgn0014009 | <b>Rab2</b>        | 0 1 0 0 | 1 |
| FBgn0086384 | <b>Mer</b> | FBgn0031802 | <b>ppk7</b>        | 0 0 0 1 | 1 |
| FBgn0086384 | <b>Mer</b> | FBgn0037686 | <b>RpL34b</b>      | 0 0 1 0 | 1 |
| FBgn0086384 | <b>Mer</b> | FBgn0013810 | <b>Dhc36C</b>      | 0 1 0 0 | 1 |

## (A) entire PPIN

|             |            |             |                   |         |   |
|-------------|------------|-------------|-------------------|---------|---|
| FBgn0086384 | <b>Mer</b> | FBgn0259789 | <b>vfl</b>        | 0 1 0 0 | 1 |
| FBgn0086384 | <b>Mer</b> | FBgn0015577 | <b>alpha-Est9</b> | 0 0 0 1 | 1 |
| FBgn0086384 | <b>Mer</b> | FBgn0035484 | <b>CG11594</b>    | 0 0 0 1 | 1 |
| FBgn0086384 | <b>Mer</b> | FBgn0039402 | <b>vps2</b>       | 0 0 0 1 | 1 |
| FBgn0086384 | <b>Mer</b> | FBgn0035033 | <b>CG3548</b>     | 0 1 0 0 | 1 |
| FBgn0086384 | <b>Mer</b> | FBgn0039686 | <b>CG15506</b>    | 0 1 0 0 | 1 |
| FBgn0086384 | <b>Mer</b> | FBgn0036220 | <b>CG5897</b>     | 0 0 1 0 | 1 |
| FBgn0086384 | <b>Mer</b> | FBgn0036398 | <b>CG9007</b>     | 0 1 0 0 | 1 |
| FBgn0086384 | <b>Mer</b> | FBgn0035424 | <b>CG11505</b>    | 0 1 0 0 | 1 |
| FBgn0086384 | <b>Mer</b> | FBgn0085451 | <b>CG34422</b>    | 0 0 0 1 | 1 |
| FBgn0086384 | <b>Mer</b> | FBgn0037137 | <b>Nopp140</b>    | 0 1 0 0 | 1 |
| FBgn0086384 | <b>Mer</b> | FBgn0000043 | <b>Act42A</b>     | 0 1 0 0 | 1 |
| FBgn0086384 | <b>Mer</b> | FBgn0023213 | <b>eIF4G</b>      | 0 1 0 0 | 1 |
| FBgn0086384 | <b>Mer</b> | FBgn0010909 | <b>msn</b>        | 0 1 0 0 | 1 |
| FBgn0086384 | <b>Mer</b> | FBgn0030943 | <b>CG6540</b>     | 0 0 1 0 | 1 |
| FBgn0086384 | <b>Mer</b> | FBgn0024432 | <b>Dlc90F</b>     | 0 1 0 0 | 1 |
| FBgn0086384 | <b>Mer</b> | FBgn0035631 | <b>Txl</b>        | 0 1 0 0 | 1 |
| FBgn0086384 | <b>Mer</b> | FBgn0010288 | <b>Uch</b>        | 0 1 0 0 | 1 |
| FBgn0086384 | <b>Mer</b> | FBgn0027363 | <b>Stam</b>       | 0 1 0 0 | 1 |
| FBgn0086384 | <b>Mer</b> | FBgn0039257 | <b>tnc</b>        | 0 0 0 1 | 1 |
| FBgn0086384 | <b>Mer</b> | FBgn0035688 | <b>CG10289</b>    | 0 1 0 0 | 1 |
| FBgn0086384 | <b>Mer</b> | FBgn0031497 | <b>CG17259</b>    | 0 1 0 0 | 1 |
| FBgn0086384 | <b>Mer</b> | FBgn0004636 | <b>R</b>          | 0 1 0 0 | 1 |
| FBgn0086384 | <b>Mer</b> | FBgn0263106 | <b>DnaJ-1</b>     | 0 1 0 0 | 1 |
| FBgn0086384 | <b>Mer</b> | FBgn0035588 | <b>CG10672</b>    | 0 0 0 1 | 1 |
| FBgn0086384 | <b>Mer</b> | FBgn0015513 | <b>mbc</b>        | 0 1 0 0 | 1 |
| FBgn0086384 | <b>Mer</b> | FBgn0020369 | <b>Pros45</b>     | 0 1 0 0 | 1 |
| FBgn0086384 | <b>Mer</b> | FBgn0262603 | <b>sec8</b>       | 0 1 0 0 | 1 |
| FBgn0086384 | <b>Mer</b> | FBgn0022985 | <b>qkr58E-2</b>   | 0 0 0 1 | 1 |
| FBgn0086384 | <b>Mer</b> | FBgn0022288 | <b>I(2)09851</b>  | 0 1 0 0 | 1 |
| FBgn0086384 | <b>Mer</b> | FBgn0030529 | <b>Clic</b>       | 0 0 0 1 | 1 |
| FBgn0086384 | <b>Mer</b> | FBgn0001315 | <b>kl-5</b>       | 0 0 0 1 | 1 |
| FBgn0086384 | <b>Mer</b> | FBgn0033261 | <b>CG18316</b>    | 0 1 0 0 | 1 |
| FBgn0086384 | <b>Mer</b> | FBgn0032193 | <b>CG5727</b>     | 0 0 0 1 | 1 |
| FBgn0086384 | <b>Mer</b> | FBgn0031980 | <b>RpL36A</b>     | 0 1 0 0 | 1 |
| FBgn0086384 | <b>Mer</b> | FBgn0033889 | <b>CG6701</b>     | 0 1 0 0 | 1 |
| FBgn0086384 | <b>Mer</b> | FBgn0038747 | <b>RhoGAP92B</b>  | 0 0 1 0 | 1 |
| FBgn0086384 | <b>Mer</b> | FBgn0011606 | <b>Klp3A</b>      | 0 0 1 0 | 1 |
| FBgn0086384 | <b>Mer</b> | FBgn0015222 | <b>Fer1HCH</b>    | 0 1 0 0 | 1 |
| FBgn0086384 | <b>Mer</b> | FBgn0014026 | <b>RpL7A</b>      | 0 1 0 0 | 1 |
| FBgn0086384 | <b>Mer</b> | FBgn0014141 | <b>cher</b>       | 0 0 1 0 | 1 |
| FBgn0086384 | <b>Mer</b> | FBgn0026252 | <b>msk</b>        | 0 0 0 1 | 1 |
| FBgn0086384 | <b>Mer</b> | FBgn0025682 | <b>scf</b>        | 0 0 0 1 | 1 |
| FBgn0086384 | <b>Mer</b> | FBgn0029629 | <b>CG8636</b>     | 0 1 0 0 | 1 |
| FBgn0086384 | <b>Mer</b> | FBgn0052026 | <b>CG32026</b>    | 0 0 0 1 | 1 |
| FBgn0086384 | <b>Mer</b> | FBgn0013469 | <b>klu</b>        | 0 0 0 1 | 1 |
| FBgn0086384 | <b>Mer</b> | FBgn0026409 | <b>Mpcp</b>       | 0 0 1 0 | 1 |
| FBgn0086384 | <b>Mer</b> | FBgn0032961 | <b>CG1416</b>     | 0 1 0 0 | 1 |
| FBgn0086384 | <b>Mer</b> | FBgn0036372 | <b>CG10083</b>    | 0 1 0 0 | 1 |
| FBgn0086384 | <b>Mer</b> | FBgn0004133 | <b>blow</b>       | 0 1 0 0 | 1 |
| FBgn0086384 | <b>Mer</b> | FBgn0005411 | <b>U2af50</b>     | 0 1 0 0 | 1 |

## (A) entire PPIN

|             |             |             |                  |               |    |
|-------------|-------------|-------------|------------------|---------------|----|
| FBgn0086384 | <b>Mer</b>  | FBgn0014073 | <b>Tie</b>       | 0 0 0 1       | 1  |
| FBgn0086384 | <b>Mer</b>  | FBgn0015379 | <b>dod</b>       | 0 1 0 0       | 1  |
| FBgn0086384 | <b>Mer</b>  | FBgn0031174 | <b>CG1486</b>    | 0 1 0 0       | 1  |
| FBgn0086384 | <b>Mer</b>  | FBgn0034237 | <b>eIF3-S9</b>   | 0 1 0 0       | 1  |
| FBgn0086384 | <b>Mer</b>  | FBgn0015609 | <b>CadN</b>      | 0 1 0 0       | 1  |
| FBgn0086384 | <b>Mer</b>  | FBgn0039055 | <b>Rassf</b>     | 0 0 0 1       | 1  |
| FBgn0038965 | <b>mats</b> | FBgn0028331 | <b>I(1)G0289</b> | 1 25 18 22    | 65 |
| FBgn0038965 | <b>mats</b> | FBgn0263006 | <b>Ca-P60A</b>   | 1 16 10 17    | 43 |
| FBgn0038965 | <b>mats</b> | FBgn0037607 | <b>CG8036</b>    | 1 9 5 8       | 22 |
| FBgn0038965 | <b>mats</b> | FBgn0035165 | <b>CG13887</b>   | 1 6 7 8       | 21 |
| FBgn0038965 | <b>mats</b> | FBgn0250814 | <b>CG4169</b>    | 0.99 14 12 15 | 41 |
| FBgn0038965 | <b>mats</b> | FBgn0035600 | <b>CG4769</b>    | 0.94 4 3 4    | 11 |
| FBgn0038965 | <b>mats</b> | FBgn0039713 | <b>RpS8</b>      | 0.9 4 3 4     | 11 |
| FBgn0038965 | <b>mats</b> | FBgn0002921 | <b>Atpalpha</b>  | 0.88 4 3 7    | 14 |
| FBgn0038965 | <b>mats</b> | FBgn0014868 | <b>Ost48</b>     | 0.86 5 4 2    | 11 |
| FBgn0038965 | <b>mats</b> | FBgn0035471 | <b>Sc2</b>       | 0.84 4 4 4    | 12 |
| FBgn0038965 | <b>mats</b> | FBgn0026409 | <b>Mpcp</b>      | 0.83 3 4 5    | 12 |
| FBgn0038965 | <b>mats</b> | FBgn0086443 | <b>Aats-asn</b>  | 0.79 4 3 2    | 9  |
| FBgn0038965 | <b>mats</b> | FBgn0001258 | <b>ImpL3</b>     | 0.79 4 2 3    | 9  |
| FBgn0038965 | <b>mats</b> | FBgn0032015 | <b>CG7830</b>    | 0.75 2 3 3    | 8  |
| FBgn0038965 | <b>mats</b> | FBgn0037643 | <b>skap</b>      | 0.74 4 3 4    | 11 |
| FBgn0038965 | <b>mats</b> | FBgn0062442 | <b>CG1458</b>    | 0.74 2 3 4    | 9  |
| FBgn0038965 | <b>mats</b> | FBgn0033204 | <b>CG2065</b>    | 0.73 5 1 5    | 11 |
| FBgn0038965 | <b>mats</b> | FBgn0035811 | <b>CG12262</b>   | 0.69 4 4 3    | 11 |
| FBgn0038965 | <b>mats</b> | FBgn0015019 | <b>Cctgamma</b>  | 0.68 4 1 5    | 10 |
| FBgn0038965 | <b>mats</b> | FBgn0261606 | <b>RpL27A</b>    | 0.67 3 2 2    | 7  |
| FBgn0038965 | <b>mats</b> | FBgn0034277 | <b>CG6370</b>    | 0.65 3 3 2    | 8  |
| FBgn0038965 | <b>mats</b> | FBgn0013770 | <b>Cp1</b>       | 0.63 1 3 3    | 7  |
| FBgn0038965 | <b>mats</b> | FBgn0261397 | <b>didum</b>     | 0.62 17 8 14  | 39 |
| FBgn0038965 | <b>mats</b> | FBgn0014010 | <b>Rab5</b>      | 0.62 2 2 2    | 6  |
| FBgn0038965 | <b>mats</b> | FBgn0029118 | <b>Sucb</b>      | 0.56 6 5 6    | 17 |
| FBgn0038965 | <b>mats</b> | FBgn0010411 | <b>RpS18</b>     | 0.54 4 2 4    | 10 |
| FBgn0038965 | <b>mats</b> | FBgn0001091 | <b>Gapdh1</b>    | 0.54 2 2 1    | 5  |
| FBgn0038965 | <b>mats</b> | FBgn0037912 | <b>sea</b>       | 0.54 2 2 1    | 5  |
| FBgn0038965 | <b>mats</b> | FBgn0003676 | <b>T-cp1</b>     | 0.53 16 12 18 | 46 |
| FBgn0038965 | <b>mats</b> | FBgn0010516 | <b>wal</b>       | 0.53 3 3 3    | 9  |
| FBgn0038965 | <b>mats</b> | FBgn0032833 | <b>CG10664</b>   | 0.53 2 1 2    | 5  |
| FBgn0038965 | <b>mats</b> | FBgn0033844 | <b>bbc</b>       | 0.51 2 3 2    | 7  |
| FBgn0038965 | <b>mats</b> | FBgn0015795 | <b>Rab7</b>      | 0.47 2 1 2    | 5  |
| FBgn0038965 | <b>mats</b> | FBgn0035440 | <b>CG14969</b>   | 0.46 2 2 1    | 5  |
| FBgn0038965 | <b>mats</b> | FBgn0029975 | <b>CG1444</b>    | 0.45 4 1 1    | 6  |
| FBgn0038965 | <b>mats</b> | FBgn0037728 | <b>CG16817</b>   | 0.45 1 2 2    | 5  |
| FBgn0038965 | <b>mats</b> | FBgn0032035 | <b>CG13393</b>   | 0.45 2 1 1    | 4  |
| FBgn0038965 | <b>mats</b> | FBgn0020618 | <b>Rack1</b>     | 0.43 4 1 4    | 9  |
| FBgn0038965 | <b>mats</b> | FBgn0010348 | <b>Arf79F</b>    | 0.42 3 3 2    | 8  |
| FBgn0038965 | <b>mats</b> | FBgn0032961 | <b>CG1416</b>    | 0.42 2 3 1    | 6  |
| FBgn0038965 | <b>mats</b> | FBgn0003517 | <b>sta</b>       | 0.42 1 2 2    | 5  |
| FBgn0038965 | <b>mats</b> | FBgn0031392 | <b>AIF</b>       | 0.41 2 3 1    | 6  |
| FBgn0038965 | <b>mats</b> | FBgn0010246 | <b>Myo61F</b>    | 0.4 8 7 9     | 24 |
| FBgn0038965 | <b>mats</b> | FBgn0263594 | <b>lost</b>      | 0.4 1 2 3     | 6  |
| FBgn0038965 | <b>mats</b> | FBgn0086687 | <b>desat1</b>    | 0.4 2 2 1     | 5  |

## (A) entire PPIN

|             |             |             |                    |             |             |     |
|-------------|-------------|-------------|--------------------|-------------|-------------|-----|
| FBgn0038965 | <b>mats</b> | FBgn0037241 | <b>CG14646</b>     | <b>0.39</b> | 2 1 2       | 5   |
| FBgn0038965 | <b>mats</b> | FBgn0015797 | <b>Rab6</b>        | <b>0.38</b> | 2 2 2       | 6   |
| FBgn0038965 | <b>mats</b> | FBgn0038293 | <b>CG6904</b>      | <b>0.38</b> | 2 0 2       | 4   |
| FBgn0038965 | <b>mats</b> | FBgn0032393 | <b>CG12264</b>     | <b>0.37</b> | 1 1 2       | 4   |
| FBgn0038965 | <b>mats</b> | FBgn0039580 | <b>Gfat2</b>       | <b>0.36</b> | 2 4 4       | 10  |
| FBgn0038965 | <b>mats</b> | FBgn0086356 | <b>tum</b>         | <b>0.33</b> | 4 3 2       | 9   |
| FBgn0038965 | <b>mats</b> | FBgn0010551 | <b>I(2)03709</b>   | <b>0.31</b> | 2 0 1       | 3   |
| FBgn0038965 | <b>mats</b> | FBgn0020235 | <b>ATPsyn-gamn</b> | <b>0.3</b>  | 2 1 1       | 4   |
| FBgn0038965 | <b>mats</b> | FBgn0053303 | <b>CG33303</b>     | <b>0.29</b> | 8 6 8       | 22  |
| FBgn0038965 | <b>mats</b> | FBgn0022288 | <b>I(2)09851</b>   | <b>0.28</b> | 3 1 2       | 6   |
| FBgn0038965 | <b>mats</b> | FBgn0033663 | <b>ERp60</b>       | <b>0.28</b> | 0 1 2       | 3   |
| FBgn0038965 | <b>mats</b> | FBgn0035237 | <b>CG13917</b>     | <b>0.26</b> | 3 0 0       | 3   |
| FBgn0038965 | <b>mats</b> | FBgn0036623 | <b>CG4729</b>      | <b>0.23</b> | 2 1 0       | 3   |
| FBgn0038965 | <b>mats</b> | FBgn0000253 | <b>Cam</b>         | <b>0.21</b> | 4 4 3       | 11  |
| FBgn0038965 | <b>mats</b> | FBgn0022268 | <b>KdelR</b>       | <b>0.21</b> | 2 0 0       | 2   |
| FBgn0038965 | <b>mats</b> | FBgn0008635 | <b>betaCop</b>     | <b>0.19</b> | 0 0 2       | 2   |
| FBgn0038965 | <b>mats</b> | FBgn0037719 | <b>bocksbeutel</b> | <b>0.16</b> | 5 2 3       | 10  |
| FBgn0038965 | <b>mats</b> | FBgn0010621 | <b>Cct5</b>        | <b>0.16</b> | 3 1 2       | 6   |
| FBgn0038965 | <b>mats</b> | FBgn0021795 | <b>Tapdelta</b>    | <b>0.13</b> | 2 2 0       | 4   |
| FBgn0038965 | <b>mats</b> | FBgn0013812 | <b>Dhc93AB</b>     | <b>0.1</b>  | 2 0 0       | 2   |
| FBgn0038965 | <b>mats</b> | FBgn0003022 | <b>Ote</b>         | <b>0.09</b> | 10 4 9      | 23  |
| FBgn0038965 | <b>mats</b> | FBgn0020255 | <b>ran</b>         | <b>0.09</b> | 1 2 2       | 5   |
| FBgn0038965 | <b>mats</b> | FBgn0017545 | <b>RpS3A</b>       | <b>0.08</b> | 4 2 1       | 7   |
| FBgn0038965 | <b>mats</b> | FBgn0039562 | <b>Gp93</b>        | <b>0.07</b> | 2 1 2       | 5   |
| FBgn0038965 | <b>mats</b> | FBgn0037632 | <b>Tcp-1eta</b>    | <b>0.07</b> | 0 0 3       | 3   |
| FBgn0038965 | <b>mats</b> | FBgn0261385 | <b>scra</b>        | <b>0.06</b> | 2 1 1       | 4   |
| FBgn0038965 | <b>mats</b> | FBgn0005533 | <b>RpS17</b>       | <b>0.05</b> | 1 2 2       | 5   |
| FBgn0038965 | <b>mats</b> | FBgn0001197 | <b>His2Av</b>      | <b>0.05</b> | 1 1 2       | 4   |
| FBgn0038965 | <b>mats</b> | FBgn0032444 | <b>CG5525</b>      | <b>0.04</b> | 1 1 4       | 6   |
| FBgn0038965 | <b>mats</b> | FBgn0011828 | <b>Pxn</b>         | <b>0.04</b> | 2 0 0       | 2   |
| FBgn0038965 | <b>mats</b> | FBgn0030993 | <b>Mec2</b>        | <b>0.03</b> | 4 4 5       | 13  |
| FBgn0038965 | <b>mats</b> | FBgn0039300 | <b>RpS27</b>       | <b>0.03</b> | 3 2 4       | 9   |
| FBgn0038965 | <b>mats</b> | FBgn0024556 | <b>EfTuM</b>       | <b>0.02</b> | 0 1 2       | 3   |
| FBgn0038965 | <b>mats</b> | FBgn0005634 | <b>zip</b>         | <b>0</b>    | 223 194 209 | 626 |
| FBgn0038965 | <b>mats</b> | FBgn0000556 | <b>Ef1alpha48D</b> | <b>0</b>    | 32 31 30    | 93  |
| FBgn0038965 | <b>mats</b> | FBgn0000042 | <b>Act5C</b>       | <b>0</b>    | 31 32 28    | 91  |
| FBgn0038965 | <b>mats</b> | FBgn0003887 | <b>betaTub56D</b>  | <b>0</b>    | 28 24 24    | 76  |
| FBgn0038965 | <b>mats</b> | FBgn0003884 | <b>alphaTub84B</b> | <b>0</b>    | 23 23 23    | 69  |
| FBgn0038965 | <b>mats</b> | FBgn0003721 | <b>Tm1</b>         | <b>0</b>    | 23 20 22    | 65  |
| FBgn0038965 | <b>mats</b> | FBgn0001219 | <b>Hsc70-4</b>     | <b>0</b>    | 21 20 21    | 62  |
| FBgn0038965 | <b>mats</b> | FBgn0002525 | <b>Lam</b>         | <b>0</b>    | 26 17 17    | 60  |
| FBgn0038965 | <b>mats</b> | FBgn0003178 | <b>PyK</b>         | <b>0</b>    | 16 19 17    | 52  |
| FBgn0038965 | <b>mats</b> | FBgn0001233 | <b>Hsp83</b>       | <b>0</b>    | 20 14 15    | 49  |
| FBgn0038965 | <b>mats</b> | FBgn0262603 | <b>sec8</b>        | <b>0</b>    | 22 14 12    | 48  |
| FBgn0038965 | <b>mats</b> | FBgn0001218 | <b>Hsc70-3</b>     | <b>0</b>    | 13 16 17    | 46  |
| FBgn0038965 | <b>mats</b> | FBgn0000709 | <b>flil</b>        | <b>0</b>    | 15 16 13    | 44  |
| FBgn0038965 | <b>mats</b> | FBgn0003360 | <b>sesB</b>        | <b>0</b>    | 16 10 12    | 38  |
| FBgn0038965 | <b>mats</b> | FBgn0030699 | <b>CG8578</b>      | <b>0</b>    | 14 11 10    | 35  |
| FBgn0038965 | <b>mats</b> | FBgn0003514 | <b>sqh</b>         | <b>0</b>    | 13 10 11    | 34  |
| FBgn0038965 | <b>mats</b> | FBgn0004687 | <b>Mlc-c</b>       | <b>0</b>    | 10 9 9      | 28  |
| FBgn0038965 | <b>mats</b> | FBgn0011211 | <b>blw</b>         | <b>0</b>    | 7 9 8       | 24  |

## (A) entire PPIN

|                  |                         |          |    |
|------------------|-------------------------|----------|----|
| FBgn0038965 mats | FBgn0261710 nocte       | 0 8 11 4 | 23 |
| FBgn0038965 mats | FBgn0039757 RpS7        | 0 11 7 4 | 22 |
| FBgn0038965 mats | FBgn0002622 RpS3        | 0 9 5 6  | 20 |
| FBgn0038965 mats | FBgn0000044 Act57B      | 0 7 7 5  | 19 |
| FBgn0038965 mats | FBgn0001220 Hsc70-5     | 0 6 7 6  | 19 |
| FBgn0038965 mats | FBgn0035499 Chd64       | 0 8 6 5  | 19 |
| FBgn0038965 mats | FBgn0038145 Droj2       | 0 6 4 7  | 17 |
| FBgn0038965 mats | FBgn0001942 eIF-4a      | 0 5 6 6  | 17 |
| FBgn0038965 mats | FBgn0034577 cpa         | 0 4 4 8  | 16 |
| FBgn0038965 mats | FBgn0001216 Hsc70-1     | 0 6 5 4  | 15 |
| FBgn0038965 mats | FBgn0011225 jar         | 0 3 5 6  | 14 |
| FBgn0038965 mats | FBgn0034743 RpS16       | 0 5 4 4  | 13 |
| FBgn0038965 mats | FBgn0004363 porin       | 0 6 3 4  | 13 |
| FBgn0038965 mats | FBgn0003888 betaTub60D  | 0 4 3 5  | 12 |
| FBgn0038965 mats | FBgn0014189 Hel25E      | 0 5 2 4  | 11 |
| FBgn0038965 mats | FBgn0031256 CG4164      | 0 4 3 4  | 11 |
| FBgn0038965 mats | FBgn0004867 RpS2        | 0 5 3 3  | 11 |
| FBgn0038965 mats | FBgn0002645 Map205      | 0 4 3 3  | 10 |
| FBgn0038965 mats | FBgn0011692 pav         | 0 2 3 4  | 9  |
| FBgn0038965 mats | FBgn0003890 betaTub97EF | 0 3 3 3  | 9  |
| FBgn0038965 mats | FBgn0015778 rin         | 0 5 2 2  | 9  |
| FBgn0038965 mats | FBgn0001961 Sop2        | 0 3 3 3  | 9  |
| FBgn0038965 mats | FBgn0011570 cpb         | 0 2 3 4  | 9  |
| FBgn0038965 mats | FBgn0031977 baf         | 0 3 3 3  | 9  |
| FBgn0038965 mats | FBgn0261593 RpS10b      | 0 4 2 2  | 8  |
| FBgn0038965 mats | FBgn0010217 ATPsyn-beta | 0 3 2 3  | 8  |
| FBgn0038965 mats | FBgn0082582 tmod        | 0 4 3 1  | 8  |
| FBgn0038965 mats | FBgn0029093 cathD       | 0 2 3 3  | 8  |
| FBgn0038965 mats | FBgn0004403 RpS14a      | 0 4 2 2  | 8  |
| FBgn0038965 mats | FBgn0029176 Ef1gamma    | 0 3 2 2  | 7  |
| FBgn0038965 mats | FBgn0263396 sqd         | 0 2 1 4  | 7  |
| FBgn0038965 mats | FBgn0010408 RpS9        | 0 3 2 2  | 7  |
| FBgn0038965 mats | FBgn0036213 RpL10Ab     | 0 2 2 3  | 7  |
| FBgn0038965 mats | FBgn0029979 CG10777     | 0 3 3 1  | 7  |
| FBgn0038965 mats | FBgn0011739 wts         | 0 3 2 2  | 7  |
| FBgn0038965 mats | FBgn0263231 bel         | 0 3 0 4  | 7  |
| FBgn0038965 mats | FBgn0019936 RpS20       | 0 2 2 3  | 7  |
| FBgn0038965 mats | FBgn0250789 alpha-Spec  | 0 3 2 1  | 6  |
| FBgn0038965 mats | FBgn0037891 CG5214      | 0 4 2 0  | 6  |
| FBgn0038965 mats | FBgn0042134 Capr        | 0 2 1 3  | 6  |
| FBgn0038965 mats | FBgn0001217 Hsc70-2     | 0 2 2 2  | 6  |
| FBgn0038965 mats | FBgn0010198 RpS15Aa     | 0 2 2 2  | 6  |
| FBgn0038965 mats | FBgn0027329 Tcp-1zeta   | 0 2 2 2  | 6  |
| FBgn0038965 mats | FBgn0000258 Ckllalpha   | 0 2 3 1  | 6  |
| FBgn0038965 mats | FBgn0000559 Ef2b        | 0 3 1 1  | 5  |
| FBgn0038965 mats | FBgn0011284 RpS4        | 0 1 2 2  | 5  |
| FBgn0038965 mats | FBgn0010078 RpL23       | 0 1 1 3  | 5  |
| FBgn0038965 mats | FBgn0263391 hts         | 0 2 0 3  | 5  |
| FBgn0038965 mats | FBgn0000173 ben         | 0 2 1 2  | 5  |
| FBgn0038965 mats | FBgn0261609 eIF-2alpha  | 0 1 2 2  | 5  |
| FBgn0038965 mats | FBgn0027932 Akap200     | 0 2 1 2  | 5  |

## (A) entire PPIN

|                  |                         |         |   |
|------------------|-------------------------|---------|---|
| FBgn0038965 mats | FBgn0031781 Arc-p20     | 0 1 3 1 | 5 |
| FBgn0038965 mats | FBgn0000319 Chc         | 0 1 2 2 | 5 |
| FBgn0038965 mats | FBgn0039697 CG7834      | 0 1 2 1 | 4 |
| FBgn0038965 mats | FBgn0032859 Arc-p34     | 0 0 2 2 | 4 |
| FBgn0038965 mats | FBgn0262734 Rbp2        | 0 1 1 2 | 4 |
| FBgn0038965 mats | FBgn0031437 p16-ARC     | 0 1 1 2 | 4 |
| FBgn0038965 mats | FBgn0040227 eIF-3p66    | 0 1 1 2 | 4 |
| FBgn0038965 mats | FBgn0261619 pAbp        | 0 1 1 2 | 4 |
| FBgn0038965 mats | FBgn0025286 RpL31       | 0 1 1 1 | 3 |
| FBgn0038965 mats | FBgn0037551 Gie         | 0 1 1 1 | 3 |
| FBgn0038965 mats | FBgn0035608 blanks      | 0 1 1 1 | 3 |
| FBgn0038965 mats | FBgn0033203 CG2070      | 0 1 1 1 | 3 |
| FBgn0038965 mats | FBgn0035987 CG3689      | 0 1 1 1 | 3 |
| FBgn0038965 mats | FBgn0005586 Rab3        | 0 1 1 1 | 3 |
| FBgn0038965 mats | FBgn0011016 SsRbeta     | 0 1 1 1 | 3 |
| FBgn0038965 mats | FBgn0002593 RpLP1       | 0 1 1 1 | 3 |
| FBgn0038965 mats | FBgn0027583 CG7601      | 0 1 1 1 | 3 |
| FBgn0038965 mats | FBgn0027066 Eb1         | 0 1 1 1 | 3 |
| FBgn0038965 mats | FBgn0028479 CG4389      | 0 1 1 1 | 3 |
| FBgn0038965 mats | FBgn0027598 cindr       | 0 1 1 1 | 3 |
| FBgn0038965 mats | FBgn0026761 Trap1       | 0 1 1 1 | 3 |
| FBgn0038965 mats | FBgn0028734 Fmr1        | 0 0 1 2 | 3 |
| FBgn0038965 mats | FBgn0012036 Aldh        | 0 2 0 1 | 3 |
| FBgn0038965 mats | FBgn0038805 TFAM        | 0 1 1 1 | 3 |
| FBgn0038965 mats | FBgn0016693 Past1       | 0 1 1 1 | 3 |
| FBgn0038965 mats | FBgn0066114 GicAT-I     | 0 1 1 1 | 3 |
| FBgn0038965 mats | FBgn0001092 Gapdh2      | 0 1 1 1 | 3 |
| FBgn0038965 mats | FBgn0034793 asrij       | 0 1 1 1 | 3 |
| FBgn0038965 mats | FBgn0019925 Surf4       | 0 1 1 1 | 3 |
| FBgn0038965 mats | FBgn0039635 CG11876     | 0 1 1 1 | 3 |
| FBgn0038965 mats | FBgn0029687 Vap-33-1    | 0 1 1 1 | 3 |
| FBgn0038965 mats | FBgn0021953 Fatp        | 0 1 1 1 | 3 |
| FBgn0038965 mats | FBgn0013325 RpL11       | 0 1 1 1 | 3 |
| FBgn0038965 mats | FBgn0052699 CG32699     | 0 1 1 1 | 3 |
| FBgn0038965 mats | FBgn0003941 RpL40       | 0 1 1 1 | 3 |
| FBgn0038965 mats | FBgn0028969 deltaCOP    | 0 1 1 1 | 3 |
| FBgn0038965 mats | FBgn0034138 RpS15       | 0 0 1 1 | 2 |
| FBgn0038965 mats | FBgn0029823 CG3011      | 0 0 1 1 | 2 |
| FBgn0038965 mats | FBgn0032465 CG12404     | 0 1 0 1 | 2 |
| FBgn0038965 mats | FBgn0002031 I(2)37Cc    | 0 1 0 1 | 2 |
| FBgn0038965 mats | FBgn0262716 Arp66B      | 0 0 0 2 | 2 |
| FBgn0038965 mats | FBgn0051735 CG31735     | 0 0 1 1 | 2 |
| FBgn0038965 mats | FBgn0016700 Rab1        | 0 0 1 1 | 2 |
| FBgn0038965 mats | FBgn0035207 CG9153      | 0 0 1 1 | 2 |
| FBgn0038965 mats | FBgn0031263 CG2789      | 0 1 1 0 | 2 |
| FBgn0038965 mats | FBgn0010265 RpS13       | 0 0 1 1 | 2 |
| FBgn0038965 mats | FBgn0052580 Muc14A      | 0 2 0 0 | 2 |
| FBgn0038965 mats | FBgn0005674 Aats-glupro | 0 0 1 1 | 2 |
| FBgn0038965 mats | FBgn0029866 CG3842      | 0 1 0 1 | 2 |
| FBgn0038965 mats | FBgn0250823 gish        | 0 0 1 1 | 2 |
| FBgn0038965 mats | FBgn0003600 Su(var)3-9  | 0 0 1 1 | 2 |

## (A) entire PPIN

|             |             |             |                         |         |   |
|-------------|-------------|-------------|-------------------------|---------|---|
| FBgn0038965 | <b>mats</b> | FBgn0028470 | <b>Patr-1</b>           | 0 1 1 0 | 2 |
| FBgn0038965 | <b>mats</b> | FBgn0039776 | <b>PH4alphaEFB</b>      | 0 1 1 0 | 2 |
| FBgn0038965 | <b>mats</b> | FBgn0085427 | <b>CG34398</b>          | 0 1 0 1 | 2 |
| FBgn0038965 | <b>mats</b> | FBgn0011742 | <b>Arp14D</b>           | 0 1 0 1 | 2 |
| FBgn0038965 | <b>mats</b> | FBgn0260441 | <b>RpS12</b>            | 0 0 1 1 | 2 |
| FBgn0038965 | <b>mats</b> | FBgn0015834 | <b>Trip1</b>            | 0 1 0 1 | 2 |
| FBgn0038965 | <b>mats</b> | FBgn0010333 | <b>Rac1</b>             | 0 1 1 0 | 2 |
| FBgn0038965 | <b>mats</b> | FBgn0263355 | <b>CG31688</b>          | 0 0 1 1 | 2 |
| FBgn0038965 | <b>mats</b> | FBgn0020910 | <b>RpL3</b>             | 0 0 1 1 | 2 |
| FBgn0038965 | <b>mats</b> | FBgn0034968 | <b>RpL12</b>            | 0 1 0 1 | 2 |
| FBgn0038965 | <b>mats</b> | FBgn0034455 | <b>CG11007</b>          | 0 0 1 1 | 2 |
| FBgn0038965 | <b>mats</b> | FBgn0000339 | <b>cni</b>              | 0 1 0 1 | 2 |
| FBgn0038965 | <b>mats</b> | FBgn0028687 | <b>Rpt1</b>             | 0 0 1 1 | 2 |
| FBgn0038965 | <b>mats</b> | FBgn0029854 | <b>CG3566</b>           | 0 1 0 1 | 2 |
| FBgn0038965 | <b>mats</b> | FBgn0004378 | <b>Klp61F</b>           | 0 0 1 1 | 2 |
| FBgn0038965 | <b>mats</b> | FBgn0037313 | <b>CG1161</b>           | 0 1 0 1 | 2 |
| FBgn0038965 | <b>mats</b> | FBgn0035763 | <b>CG8602</b>           | 0 1 0 1 | 2 |
| FBgn0038965 | <b>mats</b> | FBgn0032643 | <b>CG6453</b>           | 0 1 0 1 | 2 |
| FBgn0038965 | <b>mats</b> | FBgn0033740 | <b>dgt5</b>             | 0 0 2 0 | 2 |
| FBgn0038965 | <b>mats</b> | FBgn0013981 | <b>His4r</b>            | 0 0 1 1 | 2 |
| FBgn0038965 | <b>mats</b> | FBgn0027607 | <b>CG8230</b>           | 0 1 0 1 | 2 |
| FBgn0038965 | <b>mats</b> | FBgn0027338 | <b>Kap-alpha3</b>       | 0 1 1 0 | 2 |
| FBgn0038965 | <b>mats</b> | FBgn0031979 | <b>CG7429</b>           | 0 1 1 0 | 2 |
| FBgn0038965 | <b>mats</b> | FBgn0004888 | <b>Scsalpha</b>         | 0 0 1 1 | 2 |
| FBgn0038965 | <b>mats</b> | FBgn0037279 | <b>CG1129</b>           | 0 0 1 1 | 2 |
| FBgn0038965 | <b>mats</b> | FBgn0027571 | <b>CG3523</b>           | 0 1 0 1 | 2 |
| FBgn0038965 | <b>mats</b> | FBgn0032217 | <b>CG4972</b>           | 0 1 0 1 | 2 |
| FBgn0038965 | <b>mats</b> | FBgn0035753 | <b>RpL18</b>            | 0 0 1 1 | 2 |
| FBgn0038965 | <b>mats</b> | FBgn0037376 | <b>CG2051</b>           | 0 1 0 1 | 2 |
| FBgn0038965 | <b>mats</b> | FBgn0261597 | <b>RpS26</b>            | 0 1 0 1 | 2 |
| FBgn0038965 | <b>mats</b> | FBgn0020633 | <b>Mcm7</b>             | 0 0 1 1 | 2 |
| FBgn0038965 | <b>mats</b> | FBgn0261014 | <b>TER94</b>            | 0 0 1 1 | 2 |
| FBgn0038965 | <b>mats</b> | FBgn0036920 | <b>CG8004</b>           | 0 1 0 1 | 2 |
| FBgn0038965 | <b>mats</b> | FBgn0031661 | <b>Gmd</b>              | 0 0 1 1 | 2 |
| FBgn0038965 | <b>mats</b> | FBgn0034401 | <b>CG15100</b>          | 0 0 0 1 | 1 |
| FBgn0038965 | <b>mats</b> | FBgn0031874 | <b>CG13775</b>          | 0 0 1 0 | 1 |
| FBgn0038965 | <b>mats</b> | FBgn0021906 | <b>RF<sub>e</sub>SP</b> | 0 1 0 0 | 1 |
| FBgn0038965 | <b>mats</b> | FBgn0038476 | <b>kuk</b>              | 0 0 1 0 | 1 |
| FBgn0038965 | <b>mats</b> | FBgn0027610 | <b>Dic1</b>             | 0 0 0 1 | 1 |
| FBgn0038965 | <b>mats</b> | FBgn0034085 | <b>Ptp52F</b>           | 0 0 0 1 | 1 |
| FBgn0038965 | <b>mats</b> | FBgn0085210 | <b>CG34181</b>          | 0 1 0 0 | 1 |
| FBgn0038965 | <b>mats</b> | FBgn0028737 | <b>Ef1beta</b>          | 0 1 0 0 | 1 |
| FBgn0038965 | <b>mats</b> | FBgn0051363 | <b>Jupiter</b>          | 0 0 1 0 | 1 |
| FBgn0038965 | <b>mats</b> | FBgn0025642 | <b>CG32812</b>          | 0 0 0 1 | 1 |
| FBgn0038965 | <b>mats</b> | FBgn0037590 | <b>Or85b</b>            | 0 0 1 0 | 1 |
| FBgn0038965 | <b>mats</b> | FBgn0250845 | <b>CG1288</b>           | 0 1 0 0 | 1 |
| FBgn0038965 | <b>mats</b> | FBgn0261596 | <b>RpS24</b>            | 0 0 1 0 | 1 |
| FBgn0038965 | <b>mats</b> | FBgn0026753 | <b>Vha13</b>            | 0 0 1 0 | 1 |
| FBgn0038965 | <b>mats</b> | FBgn0027494 | <b>RpS10a</b>           | 0 0 1 0 | 1 |
| FBgn0038965 | <b>mats</b> | FBgn0051453 | <b>pch2</b>             | 0 1 0 0 | 1 |
| FBgn0038965 | <b>mats</b> | FBgn0037989 | <b>CG14741</b>          | 0 0 0 1 | 1 |



## (A) entire PPIN

|             |             |             |                   |         |   |
|-------------|-------------|-------------|-------------------|---------|---|
| FBgn0038965 | <b>mats</b> | FBgn0011787 | <b>mRpL12</b>     | 0 0 0 1 | 1 |
| FBgn0038965 | <b>mats</b> | FBgn0042627 | <b>v(2)k05816</b> | 0 0 1 0 | 1 |
| FBgn0038965 | <b>mats</b> | FBgn0031310 | <b>CG4764</b>     | 0 0 1 0 | 1 |
| FBgn0038965 | <b>mats</b> | FBgn0014024 | <b>Rnp4F</b>      | 0 0 0 1 | 1 |
| FBgn0038965 | <b>mats</b> | FBgn0030057 | <b>Ppt1</b>       | 0 0 0 1 | 1 |
| FBgn0038965 | <b>mats</b> | FBgn0036749 | <b>CG7460</b>     | 0 1 0 0 | 1 |
| FBgn0038965 | <b>mats</b> | FBgn0004227 | <b>nonA</b>       | 0 0 0 1 | 1 |
| FBgn0038965 | <b>mats</b> | FBgn0033862 | <b>CG6209</b>     | 0 0 0 1 | 1 |
| FBgn0038965 | <b>mats</b> | FBgn0004907 | <b>14-3-3zeta</b> | 0 0 1 0 | 1 |
| FBgn0038965 | <b>mats</b> | FBgn0030930 | <b>GalNAc-T2</b>  | 0 1 0 0 | 1 |
| FBgn0038965 | <b>mats</b> | FBgn0011286 | <b>Rya-r44F</b>   | 0 1 0 0 | 1 |
| FBgn0038965 | <b>mats</b> | FBgn0038730 | <b>CG6300</b>     | 0 0 1 0 | 1 |
| FBgn0038965 | <b>mats</b> | FBgn0033039 | <b>gp210</b>      | 0 1 0 0 | 1 |
| FBgn0038965 | <b>mats</b> | FBgn0035168 | <b>CG13889</b>    | 0 1 0 0 | 1 |
| FBgn0038965 | <b>mats</b> | FBgn0035416 | <b>gry</b>        | 0 1 0 0 | 1 |
| FBgn0038965 | <b>mats</b> | FBgn0033902 | <b>Tango7</b>     | 0 1 0 0 | 1 |
| FBgn0038965 | <b>mats</b> | FBgn0015737 | <b>Hmu</b>        | 0 1 0 0 | 1 |
| FBgn0038965 | <b>mats</b> | FBgn0002780 | <b>mod</b>        | 0 0 0 1 | 1 |
| FBgn0038965 | <b>mats</b> | FBgn0020912 | <b>Ptx1</b>       | 0 1 0 0 | 1 |
| FBgn0038965 | <b>mats</b> | FBgn0029764 | <b>yu</b>         | 0 1 0 0 | 1 |
| FBgn0038965 | <b>mats</b> | FBgn0027505 | <b>rab3-GAP</b>   | 0 0 0 1 | 1 |
| FBgn0038965 | <b>mats</b> | FBgn0024833 | <b>AP-47</b>      | 0 0 1 0 | 1 |
| FBgn0038965 | <b>mats</b> | FBgn0036511 | <b>CG6498</b>     | 0 1 0 0 | 1 |
| FBgn0038965 | <b>mats</b> | FBgn0010438 | <b>mtSSB</b>      | 0 0 0 1 | 1 |
| FBgn0038965 | <b>mats</b> | FBgn0015283 | <b>Pros54</b>     | 0 1 0 0 | 1 |
| FBgn0038965 | <b>mats</b> | FBgn0033342 | <b>CG8258</b>     | 0 0 0 1 | 1 |
| FBgn0038965 | <b>mats</b> | FBgn0014391 | <b>sun</b>        | 0 0 0 1 | 1 |
| FBgn0038965 | <b>mats</b> | FBgn0040308 | <b>Jafrac2</b>    | 0 1 0 0 | 1 |
| FBgn0038965 | <b>mats</b> | FBgn0015282 | <b>Pros26.4</b>   | 0 0 0 1 | 1 |
| FBgn0038965 | <b>mats</b> | FBgn0086904 | <b>Nacalpa</b>    | 0 1 0 0 | 1 |
| FBgn0038965 | <b>mats</b> | FBgn0030136 | <b>RpS28b</b>     | 0 0 0 1 | 1 |
| FBgn0038965 | <b>mats</b> | FBgn0028695 | <b>Rpn1</b>       | 0 0 1 0 | 1 |
| FBgn0038965 | <b>mats</b> | FBgn0035244 | <b>ABCB7</b>      | 0 0 1 0 | 1 |
| FBgn0038965 | <b>mats</b> | FBgn0033062 | <b>Ars2</b>       | 0 0 1 0 | 1 |
| FBgn0038965 | <b>mats</b> | FBgn0038369 | <b>Arpc3A</b>     | 0 1 0 0 | 1 |
| FBgn0038965 | <b>mats</b> | FBgn0010173 | <b>RpA-70</b>     | 0 0 0 1 | 1 |
| FBgn0038965 | <b>mats</b> | FBgn0260442 | <b>rhea</b>       | 0 1 0 0 | 1 |
| FBgn0038965 | <b>mats</b> | FBgn0019990 | <b>Gcn2</b>       | 0 0 0 1 | 1 |
| FBgn0038965 | <b>mats</b> | FBgn0014009 | <b>Rab2</b>       | 0 1 0 0 | 1 |
| FBgn0038965 | <b>mats</b> | FBgn0039536 | <b>CG18437</b>    | 0 0 0 1 | 1 |
| FBgn0038965 | <b>mats</b> | FBgn0030504 | <b>CG2691</b>     | 0 0 0 1 | 1 |
| FBgn0038965 | <b>mats</b> | FBgn0037249 | <b>eIF3-S10</b>   | 0 1 0 0 | 1 |
| FBgn0038965 | <b>mats</b> | FBgn0032050 | <b>CG13096</b>    | 0 0 0 1 | 1 |
| FBgn0038965 | <b>mats</b> | FBgn0260746 | <b>Ect3</b>       | 0 1 0 0 | 1 |
| FBgn0038965 | <b>mats</b> | FBgn0036509 | <b>CG7739</b>     | 0 1 0 0 | 1 |
| FBgn0038965 | <b>mats</b> | FBgn0051204 | <b>CG31204</b>    | 0 0 1 0 | 1 |
| FBgn0038965 | <b>mats</b> | FBgn0036732 | <b>Oatp74D</b>    | 0 1 0 0 | 1 |
| FBgn0038965 | <b>mats</b> | FBgn0002528 | <b>LanB2</b>      | 0 1 0 0 | 1 |
| FBgn0038965 | <b>mats</b> | FBgn0038611 | <b>CG14309</b>    | 0 0 1 0 | 1 |
| FBgn0038965 | <b>mats</b> | FBgn0000100 | <b>RpLP0</b>      | 0 1 0 0 | 1 |
| FBgn0038965 | <b>mats</b> | FBgn0058042 | <b>CG40042</b>    | 0 0 0 1 | 1 |

## (A) entire PPIN

|             |             |             |                  |         |   |
|-------------|-------------|-------------|------------------|---------|---|
| FBgn0038965 | <b>mats</b> | FBgn0040007 | <b>RpL38</b>     | 0 0 0 1 | 1 |
| FBgn0038965 | <b>mats</b> | FBgn0004167 | <b>kst</b>       | 0 1 0 0 | 1 |
| FBgn0038965 | <b>mats</b> | FBgn0036702 | <b>CG6512</b>    | 0 0 0 1 | 1 |
| FBgn0038965 | <b>mats</b> | FBgn0000579 | <b>Eno</b>       | 0 1 0 0 | 1 |
| FBgn0038965 | <b>mats</b> | FBgn0011726 | <b>tsr</b>       | 0 0 0 1 | 1 |
| FBgn0038965 | <b>mats</b> | FBgn0053523 | <b>CG33523</b>   | 0 0 1 0 | 1 |
| FBgn0038965 | <b>mats</b> | FBgn0038961 | <b>CG13850</b>   | 0 1 0 0 | 1 |
| FBgn0038965 | <b>mats</b> | FBgn0027616 | <b>YT521-B</b>   | 0 0 1 0 | 1 |
| FBgn0038965 | <b>mats</b> | FBgn0086656 | <b>shrb</b>      | 0 0 0 1 | 1 |
| FBgn0038965 | <b>mats</b> | FBgn0010803 | <b>Aats-trp</b>  | 0 0 1 0 | 1 |
| FBgn0038965 | <b>mats</b> | FBgn0040252 | <b>Ugt86Dh</b>   | 0 1 0 0 | 1 |
| FBgn0038965 | <b>mats</b> | FBgn0051690 | <b>CG31690</b>   | 0 0 1 0 | 1 |
| FBgn0038965 | <b>mats</b> | FBgn0032518 | <b>RpL24</b>     | 0 1 0 0 | 1 |
| FBgn0038965 | <b>mats</b> | FBgn0030466 | <b>CG15744</b>   | 0 0 0 1 | 1 |
| FBgn0038965 | <b>mats</b> | FBgn0037756 | <b>CG8507</b>    | 0 0 1 0 | 1 |
| FBgn0038965 | <b>mats</b> | FBgn0000308 | <b>chic</b>      | 0 1 0 0 | 1 |
| FBgn0038965 | <b>mats</b> | FBgn0259736 | <b>CG42390</b>   | 0 1 0 0 | 1 |
| FBgn0038965 | <b>mats</b> | FBgn0008654 | <b>Su(z)2</b>    | 0 0 0 1 | 1 |
| FBgn0038965 | <b>mats</b> | FBgn0037894 | <b>Ranbp9</b>    | 0 0 0 1 | 1 |
| FBgn0038965 | <b>mats</b> | FBgn0034012 | <b>Hr51</b>      | 0 0 0 1 | 1 |
| FBgn0038965 | <b>mats</b> | FBgn0017590 | <b>klg</b>       | 0 0 1 0 | 1 |
| FBgn0038965 | <b>mats</b> | FBgn0016797 | <b>fz2</b>       | 0 0 1 0 | 1 |
| FBgn0038965 | <b>mats</b> | FBgn0040528 | <b>CG15864</b>   | 0 0 0 1 | 1 |
| FBgn0038965 | <b>mats</b> | FBgn0030697 | <b>CG8565</b>    | 0 0 0 1 | 1 |
| FBgn0038965 | <b>mats</b> | FBgn0039743 | <b>CG7946</b>    | 0 1 0 0 | 1 |
| FBgn0038965 | <b>mats</b> | FBgn0029897 | <b>RpL17</b>     | 0 0 1 0 | 1 |
| FBgn0038965 | <b>mats</b> | FBgn0033397 | <b>Cyp4p3</b>    | 0 0 1 0 | 1 |
| FBgn0038965 | <b>mats</b> | FBgn0001315 | <b>kl-5</b>      | 0 0 1 0 | 1 |
| FBgn0038965 | <b>mats</b> | FBgn0052627 | <b>NnaD</b>      | 0 1 0 0 | 1 |
| FBgn0038965 | <b>mats</b> | FBgn0031459 | <b>CG2862</b>    | 0 0 1 0 | 1 |
| FBgn0038965 | <b>mats</b> | FBgn0003261 | <b>Rm62</b>      | 0 1 0 0 | 1 |
| FBgn0038965 | <b>mats</b> | FBgn0028360 | <b>I(1)G0148</b> | 0 0 0 1 | 1 |
| FBgn0038965 | <b>mats</b> | FBgn0004237 | <b>Hrb87F</b>    | 0 1 0 0 | 1 |
| FBgn0038965 | <b>mats</b> | FBgn0040286 | <b>SC35</b>      | 0 0 1 0 | 1 |
| FBgn0038965 | <b>mats</b> | FBgn0004908 | <b>Arf84F</b>    | 0 0 1 0 | 1 |
| FBgn0038965 | <b>mats</b> | FBgn0015756 | <b>RpL9</b>      | 0 0 0 1 | 1 |
| FBgn0038965 | <b>mats</b> | FBgn0036159 | <b>CG7557</b>    | 0 0 1 0 | 1 |
| FBgn0038965 | <b>mats</b> | FBgn0033421 | <b>CG1888</b>    | 0 0 1 0 | 1 |
| FBgn0038965 | <b>mats</b> | FBgn0028327 | <b>I(1)G0320</b> | 0 0 0 1 | 1 |
| FBgn0038965 | <b>mats</b> | FBgn0025352 | <b>Thiolase</b>  | 0 0 1 0 | 1 |
| FBgn0038965 | <b>mats</b> | FBgn0024238 | <b>Fim</b>       | 0 0 0 1 | 1 |
| FBgn0038965 | <b>mats</b> | FBgn0001313 | <b>kl-2</b>      | 0 0 0 1 | 1 |
| FBgn0038965 | <b>mats</b> | FBgn0034035 | <b>CG8207</b>    | 0 0 0 1 | 1 |
| FBgn0038965 | <b>mats</b> | FBgn0029755 | <b>Sas10</b>     | 0 1 0 0 | 1 |
| FBgn0038965 | <b>mats</b> | FBgn0051998 | <b>CG31998</b>   | 0 0 1 0 | 1 |
| FBgn0038965 | <b>mats</b> | FBgn0035091 | <b>CG3829</b>    | 0 1 0 0 | 1 |
| FBgn0038965 | <b>mats</b> | FBgn0050462 | <b>ste24c</b>    | 0 0 0 1 | 1 |
| FBgn0038965 | <b>mats</b> | FBgn0027107 | <b>inx6</b>      | 0 0 1 0 | 1 |
| FBgn0038965 | <b>mats</b> | FBgn0034398 | <b>CG15098</b>   | 0 1 0 0 | 1 |
| FBgn0038965 | <b>mats</b> | FBgn0085289 | <b>CG34260</b>   | 0 0 0 1 | 1 |
| FBgn0038965 | <b>mats</b> | FBgn0034237 | <b>eIF3-S9</b>   | 0 0 0 1 | 1 |

## (A) entire PPIN

|             |             |             |                    |      |          |     |
|-------------|-------------|-------------|--------------------|------|----------|-----|
| FBgn0038965 | <b>mats</b> | FBgn0015609 | <b>CadN</b>        | 0    | 1 0 0    | 1   |
| FBgn0038965 | <b>mats</b> | FBgn0030673 | <b>CG15601</b>     | 0    | 1 0 0    | 1   |
| FBgn0038965 | <b>mats</b> | FBgn0038550 | <b>CG17801</b>     | 0    | 0 0 1    | 1   |
| FBgn0261456 | <b>hpo</b>  | FBgn0039055 | <b>Rassf</b>       | 1    | 47 36 29 | 112 |
| FBgn0261456 | <b>hpo</b>  | FBgn0053193 | <b>sav</b>         | 1    | 28 25 15 | 68  |
| FBgn0261456 | <b>hpo</b>  | FBgn0024556 | <b>EfTuM</b>       | 1    | 11 9 11  | 31  |
| FBgn0261456 | <b>hpo</b>  | FBgn0023388 | <b>Dap160</b>      | 1    | 7 8 6    | 21  |
| FBgn0261456 | <b>hpo</b>  | FBgn0020255 | <b>ran</b>         | 0.99 | 7 9 5    | 21  |
| FBgn0261456 | <b>hpo</b>  | FBgn0010348 | <b>Arf79F</b>      | 0.99 | 7 7 5    | 19  |
| FBgn0261456 | <b>hpo</b>  | FBgn0035060 | <b>Eps-15</b>      | 0.99 | 5 6 5    | 16  |
| FBgn0261456 | <b>hpo</b>  | FBgn0263006 | <b>Ca-P60A</b>     | 0.98 | 4 6 5    | 15  |
| FBgn0261456 | <b>hpo</b>  | FBgn0030086 | <b>CG7033</b>      | 0.91 | 8 7 4    | 19  |
| FBgn0261456 | <b>hpo</b>  | FBgn0000497 | <b>ds</b>          | 0.82 | 11 7 44  | 62  |
| FBgn0261456 | <b>hpo</b>  | FBgn0010411 | <b>RpS18</b>       | 0.8  | 4 4 5    | 13  |
| FBgn0261456 | <b>hpo</b>  | FBgn0003517 | <b>sta</b>         | 0.79 | 4 3 2    | 9   |
| FBgn0261456 | <b>hpo</b>  | FBgn0020235 | <b>ATPsyn-gamn</b> | 0.78 | 3 2 3    | 8   |
| FBgn0261456 | <b>hpo</b>  | FBgn0003600 | <b>Su(var)3-9</b>  | 0.69 | 4 4 1    | 9   |
| FBgn0261456 | <b>hpo</b>  | FBgn0013770 | <b>Cp1</b>         | 0.69 | 4 3 1    | 8   |
| FBgn0261456 | <b>hpo</b>  | FBgn0040007 | <b>RpL38</b>       | 0.69 | 3 2 2    | 7   |
| FBgn0261456 | <b>hpo</b>  | FBgn0020633 | <b>Mcm7</b>        | 0.68 | 2 2 3    | 7   |
| FBgn0261456 | <b>hpo</b>  | FBgn0250814 | <b>CG4169</b>      | 0.66 | 10 9 8   | 27  |
| FBgn0261456 | <b>hpo</b>  | FBgn0026409 | <b>Mpcp</b>        | 0.65 | 5 4 1    | 10  |
| FBgn0261456 | <b>hpo</b>  | FBgn0015019 | <b>Cctgamma</b>    | 0.65 | 2 5 2    | 9   |
| FBgn0261456 | <b>hpo</b>  | FBgn0037912 | <b>sea</b>         | 0.54 | 2 2 1    | 5   |
| FBgn0261456 | <b>hpo</b>  | FBgn0037643 | <b>skap</b>        | 0.52 | 3 3 3    | 9   |
| FBgn0261456 | <b>hpo</b>  | FBgn0010621 | <b>Cct5</b>        | 0.51 | 3 4 3    | 10  |
| FBgn0261456 | <b>hpo</b>  | FBgn0033761 | <b>CG8778</b>      | 0.49 | 1 2 2    | 5   |
| FBgn0261456 | <b>hpo</b>  | FBgn0014010 | <b>Rab5</b>        | 0.49 | 2 3 0    | 5   |
| FBgn0261456 | <b>hpo</b>  | FBgn0020618 | <b>Rack1</b>       | 0.47 | 4 5 1    | 10  |
| FBgn0261456 | <b>hpo</b>  | FBgn0035811 | <b>CG12262</b>     | 0.47 | 3 3 3    | 9   |
| FBgn0261456 | <b>hpo</b>  | FBgn0025352 | <b>Thiolase</b>    | 0.47 | 2 5 2    | 9   |
| FBgn0261456 | <b>hpo</b>  | FBgn0010217 | <b>ATPsyn-beta</b> | 0.43 | 13 15 14 | 42  |
| FBgn0261456 | <b>hpo</b>  | FBgn0037607 | <b>CG8036</b>      | 0.43 | 4 2 1    | 7   |
| FBgn0261456 | <b>hpo</b>  | FBgn0005533 | <b>RpS17</b>       | 0.42 | 4 3 2    | 9   |
| FBgn0261456 | <b>hpo</b>  | FBgn0031310 | <b>CG4764</b>      | 0.42 | 1 2 1    | 4   |
| FBgn0261456 | <b>hpo</b>  | FBgn0003676 | <b>T-cp1</b>       | 0.4  | 16 15 9  | 40  |
| FBgn0261456 | <b>hpo</b>  | FBgn0029093 | <b>cathD</b>       | 0.4  | 8 7 5    | 20  |
| FBgn0261456 | <b>hpo</b>  | FBgn0027329 | <b>Tcp-1zeta</b>   | 0.39 | 6 5 4    | 15  |
| FBgn0261456 | <b>hpo</b>  | FBgn0037551 | <b>Gie</b>         | 0.39 | 2 0 2    | 4   |
| FBgn0261456 | <b>hpo</b>  | FBgn0014189 | <b>Hel25E</b>      | 0.38 | 8 8 4    | 20  |
| FBgn0261456 | <b>hpo</b>  | FBgn0010516 | <b>wal</b>         | 0.38 | 4 2 2    | 8   |
| FBgn0261456 | <b>hpo</b>  | FBgn0039130 | <b>CG5854</b>      | 0.37 | 1 2 1    | 4   |
| FBgn0261456 | <b>hpo</b>  | FBgn0016685 | <b>Nlp</b>         | 0.33 | 2 1 0    | 3   |
| FBgn0261456 | <b>hpo</b>  | FBgn0039635 | <b>CG11876</b>     | 0.31 | 2 1 0    | 3   |
| FBgn0261456 | <b>hpo</b>  | FBgn0019936 | <b>RpS20</b>       | 0.3  | 5 7 3    | 15  |
| FBgn0261456 | <b>hpo</b>  | FBgn0003607 | <b>Su(var)205</b>  | 0.29 | 3 0 0    | 3   |
| FBgn0261456 | <b>hpo</b>  | FBgn0261609 | <b>eIF-2alpha</b>  | 0.27 | 4 5 3    | 12  |
| FBgn0261456 | <b>hpo</b>  | FBgn0015797 | <b>Rab6</b>        | 0.27 | 2 2 1    | 5   |
| FBgn0261456 | <b>hpo</b>  | FBgn0034138 | <b>RpS15</b>       | 0.27 | 0 2 1    | 3   |
| FBgn0261456 | <b>hpo</b>  | FBgn0014009 | <b>Rab2</b>        | 0.27 | 1 2 0    | 3   |
| FBgn0261456 | <b>hpo</b>  | FBgn0033342 | <b>CG8258</b>      | 0.26 | 1 1 2    | 4   |

## (A) entire PPIN

|             |            |             |                     |             |             |     |
|-------------|------------|-------------|---------------------|-------------|-------------|-----|
| FBgn0261456 | <b>hpo</b> | FBgn0022349 | <b>CG1910</b>       | <b>0.26</b> | 3 0 0       | 3   |
| FBgn0261456 | <b>hpo</b> | FBgn0011211 | <b>blw</b>          | <b>0.22</b> | 14 10 11    | 35  |
| FBgn0261456 | <b>hpo</b> | FBgn0263598 | <b>Vha68-2</b>      | <b>0.22</b> | 2 0 0       | 2   |
| FBgn0261456 | <b>hpo</b> | FBgn0040011 | <b>CG17494</b>      | <b>0.21</b> | 3 1 0       | 4   |
| FBgn0261456 | <b>hpo</b> | FBgn0032961 | <b>CG1416</b>       | <b>0.2</b>  | 1 1 2       | 4   |
| FBgn0261456 | <b>hpo</b> | FBgn0053303 | <b>CG33303</b>      | <b>0.19</b> | 7 8 4       | 19  |
| FBgn0261456 | <b>hpo</b> | FBgn0037719 | <b>bocksbeutel</b>  | <b>0.19</b> | 5 4 1       | 10  |
| FBgn0261456 | <b>hpo</b> | FBgn0015929 | <b>dpa</b>          | <b>0.18</b> | 1 2 1       | 4   |
| FBgn0261456 | <b>hpo</b> | FBgn0028685 | <b>Rpt4</b>         | <b>0.17</b> | 2 0 0       | 2   |
| FBgn0261456 | <b>hpo</b> | FBgn0086443 | <b>Aats-asn</b>     | <b>0.17</b> | 2 0 0       | 2   |
| FBgn0261456 | <b>hpo</b> | FBgn0010774 | <b>Aly</b>          | <b>0.17</b> | 2 0 0       | 2   |
| FBgn0261456 | <b>hpo</b> | FBgn0029118 | <b>Sucb</b>         | <b>0.16</b> | 5 4 3       | 12  |
| FBgn0261456 | <b>hpo</b> | FBgn0010265 | <b>RpS13</b>        | <b>0.16</b> | 3 3 2       | 8   |
| FBgn0261456 | <b>hpo</b> | FBgn0033844 | <b>bbc</b>          | <b>0.16</b> | 2 1 0       | 3   |
| FBgn0261456 | <b>hpo</b> | FBgn0039300 | <b>RpS27</b>        | <b>0.15</b> | 5 3 3       | 11  |
| FBgn0261456 | <b>hpo</b> | FBgn0038805 | <b>TFAM</b>         | <b>0.15</b> | 4 3 1       | 8   |
| FBgn0261456 | <b>hpo</b> | FBgn0001075 | <b>ft</b>           | <b>0.15</b> | 1 1 2       | 4   |
| FBgn0261456 | <b>hpo</b> | FBgn0263594 | <b>lost</b>         | <b>0.15</b> | 1 2 0       | 3   |
| FBgn0261456 | <b>hpo</b> | FBgn0032444 | <b>CG5525</b>       | <b>0.14</b> | 5 1 1       | 7   |
| FBgn0261456 | <b>hpo</b> | FBgn0038965 | <b>mats</b>         | <b>0.14</b> | 1 1 2       | 4   |
| FBgn0261456 | <b>hpo</b> | FBgn0064225 | <b>RpL5</b>         | <b>0.14</b> | 2 2 0       | 4   |
| FBgn0261456 | <b>hpo</b> | FBgn0034743 | <b>RpS16</b>        | <b>0.12</b> | 9 10 6      | 25  |
| FBgn0261456 | <b>hpo</b> | FBgn0017545 | <b>RpS3A</b>        | <b>0.11</b> | 4 3 2       | 9   |
| FBgn0261456 | <b>hpo</b> | FBgn0004867 | <b>RpS2</b>         | <b>0.1</b>  | 4 7 2       | 13  |
| FBgn0261456 | <b>hpo</b> | FBgn0022288 | <b>I(2)09851</b>    | <b>0.1</b>  | 2 1 1       | 4   |
| FBgn0261456 | <b>hpo</b> | FBgn0010408 | <b>RpS9</b>         | <b>0.07</b> | 4 4 3       | 11  |
| FBgn0261456 | <b>hpo</b> | FBgn0037632 | <b>Tcp-1eta</b>     | <b>0.07</b> | 3 2 1       | 6   |
| FBgn0261456 | <b>hpo</b> | FBgn0010078 | <b>RpL23</b>        | <b>0.06</b> | 7 6 6       | 19  |
| FBgn0261456 | <b>hpo</b> | FBgn0034968 | <b>RpL12</b>        | <b>0.06</b> | 4 4 3       | 11  |
| FBgn0261456 | <b>hpo</b> | FBgn0001197 | <b>His2Av</b>       | <b>0.06</b> | 1 2 1       | 4   |
| FBgn0261456 | <b>hpo</b> | FBgn0015283 | <b>Pros54</b>       | <b>0.05</b> | 1 2 1       | 4   |
| FBgn0261456 | <b>hpo</b> | FBgn0039562 | <b>Gp93</b>         | <b>0.05</b> | 2 0 1       | 3   |
| FBgn0261456 | <b>hpo</b> | FBgn0086710 | <b>RpL30</b>        | <b>0.04</b> | 2 1 2       | 5   |
| FBgn0261456 | <b>hpo</b> | FBgn0028734 | <b>Fmr1</b>         | <b>0.03</b> | 6 4 1       | 11  |
| FBgn0261456 | <b>hpo</b> | FBgn0053868 | <b>His2B:CG3386</b> | <b>0.03</b> | 2 0 1       | 3   |
| FBgn0261456 | <b>hpo</b> | FBgn0001942 | <b>eIF-4a</b>       | <b>0.02</b> | 12 13 9     | 34  |
| FBgn0261456 | <b>hpo</b> | FBgn0000253 | <b>Cam</b>          | <b>0.02</b> | 1 1 3       | 5   |
| FBgn0261456 | <b>hpo</b> | FBgn0002622 | <b>RpS3</b>         | <b>0.01</b> | 14 13 7     | 34  |
| FBgn0261456 | <b>hpo</b> | FBgn0036213 | <b>RpL10Ab</b>      | <b>0.01</b> | 4 6 7       | 17  |
| FBgn0261456 | <b>hpo</b> | FBgn0261593 | <b>RpS10b</b>       | <b>0.01</b> | 5 5 3       | 13  |
| FBgn0261456 | <b>hpo</b> | FBgn0030993 | <b>Mec2</b>         | <b>0.01</b> | 4 4 4       | 12  |
| FBgn0261456 | <b>hpo</b> | FBgn0028327 | <b>I(1)G0320</b>    | <b>0.01</b> | 2 2 4       | 8   |
| FBgn0261456 | <b>hpo</b> | FBgn0039580 | <b>Gfat2</b>        | <b>0.01</b> | 2 2 1       | 5   |
| FBgn0261456 | <b>hpo</b> | FBgn0028687 | <b>Rpt1</b>         | <b>0.01</b> | 3 2 0       | 5   |
| FBgn0261456 | <b>hpo</b> | FBgn0030672 | <b>CG9281</b>       | <b>0.01</b> | 1 2 1       | 4   |
| FBgn0261456 | <b>hpo</b> | FBgn0028695 | <b>Rpn1</b>         | <b>0.01</b> | 0 1 2       | 3   |
| FBgn0261456 | <b>hpo</b> | FBgn0005634 | <b>zip</b>          | <b>0</b>    | 194 180 178 | 552 |
| FBgn0261456 | <b>hpo</b> | FBgn0000556 | <b>Ef1alpha48D</b>  | <b>0</b>    | 40 43 44    | 127 |
| FBgn0261456 | <b>hpo</b> | FBgn0000042 | <b>Act5C</b>        | <b>0</b>    | 36 33 29    | 98  |
| FBgn0261456 | <b>hpo</b> | FBgn0003887 | <b>betaTub56D</b>   | <b>0</b>    | 33 34 24    | 91  |
| FBgn0261456 | <b>hpo</b> | FBgn0001219 | <b>Hsc70-4</b>      | <b>0</b>    | 32 28 24    | 84  |

## (A) entire PPIN

|             |            |             |                    |            |    |
|-------------|------------|-------------|--------------------|------------|----|
| FBgn0261456 | <b>hpo</b> | FBgn0003884 | <b>alphaTub84B</b> | 0 26 25 20 | 71 |
| FBgn0261456 | <b>hpo</b> | FBgn0003178 | <b>PyK</b>         | 0 22 25 19 | 66 |
| FBgn0261456 | <b>hpo</b> | FBgn0003721 | <b>Tm1</b>         | 0 20 19 24 | 63 |
| FBgn0261456 | <b>hpo</b> | FBgn0002525 | <b>Lam</b>         | 0 18 13 8  | 39 |
| FBgn0261456 | <b>hpo</b> | FBgn0039757 | <b>RpS7</b>        | 0 12 12 9  | 33 |
| FBgn0261456 | <b>hpo</b> | FBgn0001218 | <b>Hsc70-3</b>     | 0 12 11 9  | 32 |
| FBgn0261456 | <b>hpo</b> | FBgn0003360 | <b>sesB</b>        | 0 11 9 9   | 29 |
| FBgn0261456 | <b>hpo</b> | FBgn0004687 | <b>Mlc-c</b>       | 0 9 11 9   | 29 |
| FBgn0261456 | <b>hpo</b> | FBgn0037891 | <b>CG5214</b>      | 0 9 11 7   | 27 |
| FBgn0261456 | <b>hpo</b> | FBgn0030699 | <b>CG8578</b>      | 0 8 9 8    | 25 |
| FBgn0261456 | <b>hpo</b> | FBgn0003888 | <b>betaTub60D</b>  | 0 8 7 8    | 23 |
| FBgn0261456 | <b>hpo</b> | FBgn0001233 | <b>Hsp83</b>       | 0 8 6 8    | 22 |
| FBgn0261456 | <b>hpo</b> | FBgn0000709 | <b>filI</b>        | 0 9 8 5    | 22 |
| FBgn0261456 | <b>hpo</b> | FBgn0039697 | <b>CG7834</b>      | 0 7 6 5    | 18 |
| FBgn0261456 | <b>hpo</b> | FBgn0035499 | <b>Chd64</b>       | 0 5 7 5    | 17 |
| FBgn0261456 | <b>hpo</b> | FBgn0011284 | <b>RpS4</b>        | 0 6 5 4    | 15 |
| FBgn0261456 | <b>hpo</b> | FBgn0263231 | <b>bel</b>         | 0 8 5 1    | 14 |
| FBgn0261456 | <b>hpo</b> | FBgn0000044 | <b>Act57B</b>      | 0 5 5 3    | 13 |
| FBgn0261456 | <b>hpo</b> | FBgn0262734 | <b>Rbp2</b>        | 0 6 4 3    | 13 |
| FBgn0261456 | <b>hpo</b> | FBgn0082582 | <b>tmod</b>        | 0 4 3 5    | 12 |
| FBgn0261456 | <b>hpo</b> | FBgn0010198 | <b>RpS15Aa</b>     | 0 5 3 4    | 12 |
| FBgn0261456 | <b>hpo</b> | FBgn0263391 | <b>hts</b>         | 0 6 5 1    | 12 |
| FBgn0261456 | <b>hpo</b> | FBgn0001216 | <b>Hsc70-1</b>     | 0 5 4 3    | 12 |
| FBgn0261456 | <b>hpo</b> | FBgn0263396 | <b>sqd</b>         | 0 4 4 3    | 11 |
| FBgn0261456 | <b>hpo</b> | FBgn0027066 | <b>Eb1</b>         | 0 5 5 1    | 11 |
| FBgn0261456 | <b>hpo</b> | FBgn0004403 | <b>RpS14a</b>      | 0 5 3 3    | 11 |
| FBgn0261456 | <b>hpo</b> | FBgn0034577 | <b>cpa</b>         | 0 5 4 2    | 11 |
| FBgn0261456 | <b>hpo</b> | FBgn0031977 | <b>baf</b>         | 0 4 2 5    | 11 |
| FBgn0261456 | <b>hpo</b> | FBgn0015778 | <b>rin</b>         | 0 3 5 2    | 10 |
| FBgn0261456 | <b>hpo</b> | FBgn0038145 | <b>Droj2</b>       | 0 6 2 2    | 10 |
| FBgn0261456 | <b>hpo</b> | FBgn0004888 | <b>Scsalpha</b>    | 0 3 4 3    | 10 |
| FBgn0261456 | <b>hpo</b> | FBgn0000181 | <b>bic</b>         | 0 5 2 2    | 9  |
| FBgn0261456 | <b>hpo</b> | FBgn0003890 | <b>betaTub97EF</b> | 0 3 3 3    | 9  |
| FBgn0261456 | <b>hpo</b> | FBgn0001220 | <b>Hsc70-5</b>     | 0 4 3 2    | 9  |
| FBgn0261456 | <b>hpo</b> | FBgn0027932 | <b>Akap200</b>     | 0 5 2 2    | 9  |
| FBgn0261456 | <b>hpo</b> | FBgn0004363 | <b>porin</b>       | 0 4 3 2    | 9  |
| FBgn0261456 | <b>hpo</b> | FBgn0000258 | <b>CklIalpha</b>   | 0 3 3 3    | 9  |
| FBgn0261456 | <b>hpo</b> | FBgn0261619 | <b>pAbp</b>        | 0 2 4 2    | 8  |
| FBgn0261456 | <b>hpo</b> | FBgn0011570 | <b>cpb</b>         | 0 2 2 4    | 8  |
| FBgn0261456 | <b>hpo</b> | FBgn0029176 | <b>Ef1gamma</b>    | 0 3 2 2    | 7  |
| FBgn0261456 | <b>hpo</b> | FBgn0086904 | <b>Nacalalpha</b>  | 0 2 3 2    | 7  |
| FBgn0261456 | <b>hpo</b> | FBgn0051363 | <b>Jupiter</b>     | 0 2 3 1    | 6  |
| FBgn0261456 | <b>hpo</b> | FBgn0001217 | <b>Hsc70-2</b>     | 0 2 2 2    | 6  |
| FBgn0261456 | <b>hpo</b> | FBgn0087035 | <b>AGO2</b>        | 0 3 3 0    | 6  |
| FBgn0261456 | <b>hpo</b> | FBgn0004237 | <b>Hrb87F</b>      | 0 3 3 0    | 6  |
| FBgn0261456 | <b>hpo</b> | FBgn0035608 | <b>blanks</b>      | 0 1 2 2    | 5  |
| FBgn0261456 | <b>hpo</b> | FBgn0031256 | <b>CG4164</b>      | 0 1 2 2    | 5  |
| FBgn0261456 | <b>hpo</b> | FBgn0013325 | <b>RpL11</b>       | 0 2 1 2    | 5  |
| FBgn0261456 | <b>hpo</b> | FBgn0015756 | <b>RpL9</b>        | 0 2 2 1    | 5  |
| FBgn0261456 | <b>hpo</b> | FBgn0028969 | <b>deltaCOP</b>    | 0 1 3 1    | 5  |
| FBgn0261456 | <b>hpo</b> | FBgn0025286 | <b>RpL31</b>       | 0 1 2 1    | 4  |

## (A) entire PPIN

|             |            |             |                    |         |   |
|-------------|------------|-------------|--------------------|---------|---|
| FBgn0261456 | <b>hpo</b> | FBgn0039776 | <b>PH4alphaEFB</b> | 0 2 2 0 | 4 |
| FBgn0261456 | <b>hpo</b> | FBgn0015834 | <b>Trip1</b>       | 0 1 2 1 | 4 |
| FBgn0261456 | <b>hpo</b> | FBgn0032731 | <b>CG10641</b>     | 0 2 2 0 | 4 |
| FBgn0261456 | <b>hpo</b> | FBgn0001961 | <b>Sop2</b>        | 0 2 2 0 | 4 |
| FBgn0261456 | <b>hpo</b> | FBgn0040227 | <b>eIF-3p66</b>    | 0 1 2 1 | 4 |
| FBgn0261456 | <b>hpo</b> | FBgn0003022 | <b>Ote</b>         | 0 3 1 0 | 4 |
| FBgn0261456 | <b>hpo</b> | FBgn0034970 | <b>yki</b>         | 0 2 0 1 | 3 |
| FBgn0261456 | <b>hpo</b> | FBgn0250789 | <b>alpha-Spec</b>  | 0 2 0 1 | 3 |
| FBgn0261456 | <b>hpo</b> | FBgn0086768 | <b>Pcmt</b>        | 0 1 1 1 | 3 |
| FBgn0261456 | <b>hpo</b> | FBgn0003514 | <b>sqh</b>         | 0 1 0 2 | 3 |
| FBgn0261456 | <b>hpo</b> | FBgn0261397 | <b>didum</b>       | 0 2 1 0 | 3 |
| FBgn0261456 | <b>hpo</b> | FBgn0005586 | <b>Rab3</b>        | 0 1 1 1 | 3 |
| FBgn0261456 | <b>hpo</b> | FBgn0027494 | <b>RpS10a</b>      | 0 1 1 1 | 3 |
| FBgn0261456 | <b>hpo</b> | FBgn0011016 | <b>SsRbeta</b>     | 0 1 1 1 | 3 |
| FBgn0261456 | <b>hpo</b> | FBgn0046214 | <b>vig2</b>        | 0 3 0 0 | 3 |
| FBgn0261456 | <b>hpo</b> | FBgn0010246 | <b>Myo61F</b>      | 0 3 0 0 | 3 |
| FBgn0261456 | <b>hpo</b> | FBgn0026761 | <b>Trap1</b>       | 0 1 1 1 | 3 |
| FBgn0261456 | <b>hpo</b> | FBgn0014391 | <b>sun</b>         | 0 1 1 1 | 3 |
| FBgn0261456 | <b>hpo</b> | FBgn0036300 | <b>CG10688</b>     | 0 1 1 1 | 3 |
| FBgn0261456 | <b>hpo</b> | FBgn0021795 | <b>Tapdelta</b>    | 0 1 1 1 | 3 |
| FBgn0261456 | <b>hpo</b> | FBgn0000173 | <b>ben</b>         | 0 0 2 1 | 3 |
| FBgn0261456 | <b>hpo</b> | FBgn0014029 | <b>Sep2</b>        | 0 1 1 1 | 3 |
| FBgn0261456 | <b>hpo</b> | FBgn0027338 | <b>Kap-alpha3</b>  | 0 1 1 1 | 3 |
| FBgn0261456 | <b>hpo</b> | FBgn0262603 | <b>sec8</b>        | 0 1 1 1 | 3 |
| FBgn0261456 | <b>hpo</b> | FBgn0002645 | <b>Map205</b>      | 0 1 1 1 | 3 |
| FBgn0261456 | <b>hpo</b> | FBgn0003261 | <b>Rm62</b>        | 0 2 1 0 | 3 |
| FBgn0261456 | <b>hpo</b> | FBgn0000319 | <b>Chc</b>         | 0 1 2 0 | 3 |
| FBgn0261456 | <b>hpo</b> | FBgn0029823 | <b>CG3011</b>      | 0 1 0 1 | 2 |
| FBgn0261456 | <b>hpo</b> | FBgn0015268 | <b>Nap1</b>        | 0 0 1 1 | 2 |
| FBgn0261456 | <b>hpo</b> | FBgn0051413 | <b>CG31413</b>     | 0 1 1 0 | 2 |
| FBgn0261456 | <b>hpo</b> | FBgn0016700 | <b>Rab1</b>        | 0 1 1 0 | 2 |
| FBgn0261456 | <b>hpo</b> | FBgn0003345 | <b>sd</b>          | 0 1 0 1 | 2 |
| FBgn0261456 | <b>hpo</b> | FBgn0020513 | <b>ade5</b>        | 0 1 1 0 | 2 |
| FBgn0261456 | <b>hpo</b> | FBgn0033205 | <b>CG2064</b>      | 0 1 1 0 | 2 |
| FBgn0261456 | <b>hpo</b> | FBgn0035987 | <b>CG3689</b>      | 0 1 0 1 | 2 |
| FBgn0261456 | <b>hpo</b> | FBgn0000559 | <b>Ef2b</b>        | 0 1 0 1 | 2 |
| FBgn0261456 | <b>hpo</b> | FBgn0026753 | <b>Vha13</b>       | 0 1 1 0 | 2 |
| FBgn0261456 | <b>hpo</b> | FBgn0028470 | <b>Patr-1</b>      | 0 1 0 1 | 2 |
| FBgn0261456 | <b>hpo</b> | FBgn0034259 | <b>CG6459</b>      | 0 0 1 1 | 2 |
| FBgn0261456 | <b>hpo</b> | FBgn0004227 | <b>nonA</b>        | 0 2 0 0 | 2 |
| FBgn0261456 | <b>hpo</b> | FBgn0036892 | <b>CG8798</b>      | 0 0 1 1 | 2 |
| FBgn0261456 | <b>hpo</b> | FBgn0033902 | <b>Tango7</b>      | 0 1 1 0 | 2 |
| FBgn0261456 | <b>hpo</b> | FBgn0026562 | <b>BM-40-SPARC</b> | 0 1 1 0 | 2 |
| FBgn0261456 | <b>hpo</b> | FBgn0020910 | <b>RpL3</b>        | 0 1 1 0 | 2 |
| FBgn0261456 | <b>hpo</b> | FBgn0030136 | <b>RpS28b</b>      | 0 1 0 1 | 2 |
| FBgn0261456 | <b>hpo</b> | FBgn0036121 | <b>CG6310</b>      | 0 1 1 0 | 2 |
| FBgn0261456 | <b>hpo</b> | FBgn0035471 | <b>Sc2</b>         | 0 1 1 0 | 2 |
| FBgn0261456 | <b>hpo</b> | FBgn0004828 | <b>His3.3B</b>     | 0 1 1 0 | 2 |
| FBgn0261456 | <b>hpo</b> | FBgn0261068 | <b>LSm7</b>        | 0 1 1 0 | 2 |
| FBgn0261456 | <b>hpo</b> | FBgn0035229 | <b>CG7852</b>      | 0 1 0 1 | 2 |
| FBgn0261456 | <b>hpo</b> | FBgn0015795 | <b>Rab7</b>        | 0 1 1 0 | 2 |

## (A) entire PPIN

|             |            |             |                   |         |   |
|-------------|------------|-------------|-------------------|---------|---|
| FBgn0261456 | <b>hpo</b> | FBgn0030747 | <b>CG4301</b>     | 0 1 0 1 | 2 |
| FBgn0261456 | <b>hpo</b> | FBgn0032435 | <b>Oatp33Eb</b>   | 0 1 0 1 | 2 |
| FBgn0261456 | <b>hpo</b> | FBgn0261599 | <b>RpS29</b>      | 0 1 1 0 | 2 |
| FBgn0261456 | <b>hpo</b> | FBgn0032393 | <b>CG12264</b>    | 0 1 1 0 | 2 |
| FBgn0261456 | <b>hpo</b> | FBgn0011710 | <b>Sep1</b>       | 0 1 1 0 | 2 |
| FBgn0261456 | <b>hpo</b> | FBgn0027571 | <b>CG3523</b>     | 0 1 1 0 | 2 |
| FBgn0261456 | <b>hpo</b> | FBgn0037376 | <b>CG2051</b>     | 0 1 1 0 | 2 |
| FBgn0261456 | <b>hpo</b> | FBgn0039209 | <b>CG13624</b>    | 0 1 0 0 | 1 |
| FBgn0261456 | <b>hpo</b> | FBgn0036882 | <b>CG9279</b>     | 0 0 1 0 | 1 |
| FBgn0261456 | <b>hpo</b> | FBgn0001142 | <b>Gs1</b>        | 0 0 1 0 | 1 |
| FBgn0261456 | <b>hpo</b> | FBgn0263351 | <b>AP-50</b>      | 0 0 1 0 | 1 |
| FBgn0261456 | <b>hpo</b> | FBgn0034249 | <b>RhoGAP54D</b>  | 0 1 0 0 | 1 |
| FBgn0261456 | <b>hpo</b> | FBgn0033194 | <b>Vps13</b>      | 0 1 0 0 | 1 |
| FBgn0261456 | <b>hpo</b> | FBgn0029688 | <b>Iva</b>        | 0 0 1 0 | 1 |
| FBgn0261456 | <b>hpo</b> | FBgn0033142 | <b>CG12835</b>    | 0 1 0 0 | 1 |
| FBgn0261456 | <b>hpo</b> | FBgn0038476 | <b>kuk</b>        | 0 0 1 0 | 1 |
| FBgn0261456 | <b>hpo</b> | FBgn0015589 | <b>Apc</b>        | 0 0 1 0 | 1 |
| FBgn0261456 | <b>hpo</b> | FBgn0036004 | <b>Jarid2</b>     | 0 0 1 0 | 1 |
| FBgn0261456 | <b>hpo</b> | FBgn0037895 | <b>CG6723</b>     | 0 0 0 1 | 1 |
| FBgn0261456 | <b>hpo</b> | FBgn0039359 | <b>RpL27</b>      | 0 0 1 0 | 1 |
| FBgn0261456 | <b>hpo</b> | FBgn0064117 | <b>CG33714</b>    | 0 1 0 0 | 1 |
| FBgn0261456 | <b>hpo</b> | FBgn0028737 | <b>Ef1beta</b>    | 0 1 0 0 | 1 |
| FBgn0261456 | <b>hpo</b> | FBgn0030764 | <b>CG9777</b>     | 0 0 0 1 | 1 |
| FBgn0261456 | <b>hpo</b> | FBgn0003483 | <b>spn-E</b>      | 0 0 1 0 | 1 |
| FBgn0261456 | <b>hpo</b> | FBgn0025687 | <b>LKR</b>        | 0 0 1 0 | 1 |
| FBgn0261456 | <b>hpo</b> | FBgn0035438 | <b>PHGPx</b>      | 0 0 1 0 | 1 |
| FBgn0261456 | <b>hpo</b> | FBgn0032915 | <b>CG12050</b>    | 0 0 1 0 | 1 |
| FBgn0261456 | <b>hpo</b> | FBgn0053129 | <b>CG33129</b>    | 0 1 0 0 | 1 |
| FBgn0261456 | <b>hpo</b> | FBgn0034529 | <b>CG16742</b>    | 0 1 0 0 | 1 |
| FBgn0261456 | <b>hpo</b> | FBgn0027785 | <b>NP15.6</b>     | 0 1 0 0 | 1 |
| FBgn0261456 | <b>hpo</b> | FBgn0050115 | <b>CG30115</b>    | 0 1 0 0 | 1 |
| FBgn0261456 | <b>hpo</b> | FBgn0003656 | <b>sws</b>        | 0 0 1 0 | 1 |
| FBgn0261456 | <b>hpo</b> | FBgn0031069 | <b>CG12703</b>    | 0 0 1 0 | 1 |
| FBgn0261456 | <b>hpo</b> | FBgn0037143 | <b>CG7448</b>     | 0 0 0 1 | 1 |
| FBgn0261456 | <b>hpo</b> | FBgn0003124 | <b>polo</b>       | 0 1 0 0 | 1 |
| FBgn0261456 | <b>hpo</b> | FBgn0002921 | <b>Atpalpha</b>   | 0 1 0 0 | 1 |
| FBgn0261456 | <b>hpo</b> | FBgn0050489 | <b>Cyp12d1-p</b>  | 0 1 0 0 | 1 |
| FBgn0261456 | <b>hpo</b> | FBgn0263257 | <b>cngl</b>       | 0 0 0 1 | 1 |
| FBgn0261456 | <b>hpo</b> | FBgn0083960 | <b>CG34124</b>    | 0 1 0 0 | 1 |
| FBgn0261456 | <b>hpo</b> | FBgn0086712 | <b>Egm</b>        | 0 1 0 0 | 1 |
| FBgn0261456 | <b>hpo</b> | FBgn0039085 | <b>CG10170</b>    | 0 1 0 0 | 1 |
| FBgn0261456 | <b>hpo</b> | FBgn0028331 | <b>I(1)G0289</b>  | 0 0 0 1 | 1 |
| FBgn0261456 | <b>hpo</b> | FBgn0051560 | <b>CG31560</b>    | 0 0 1 0 | 1 |
| FBgn0261456 | <b>hpo</b> | FBgn0050122 | <b>CG30122</b>    | 0 1 0 0 | 1 |
| FBgn0261456 | <b>hpo</b> | FBgn0033636 | <b>tou</b>        | 0 1 0 0 | 1 |
| FBgn0261456 | <b>hpo</b> | FBgn0260743 | <b>CG18347</b>    | 0 0 1 0 | 1 |
| FBgn0261456 | <b>hpo</b> | FBgn0039304 | <b>CG10425</b>    | 0 1 0 0 | 1 |
| FBgn0261456 | <b>hpo</b> | FBgn0028684 | <b>Tbp-1</b>      | 0 1 0 0 | 1 |
| FBgn0261456 | <b>hpo</b> | FBgn0004907 | <b>14-3-3zeta</b> | 0 1 0 0 | 1 |
| FBgn0261456 | <b>hpo</b> | FBgn0002593 | <b>RpLP1</b>      | 0 1 0 0 | 1 |
| FBgn0261456 | <b>hpo</b> | FBgn0030940 | <b>CG15040</b>    | 0 0 0 1 | 1 |

## (A) entire PPIN

|             |            |             |                      |         |   |
|-------------|------------|-------------|----------------------|---------|---|
| FBgn0261456 | <b>hpo</b> | FBgn0011286 | <b>Rya-r44F</b>      | 0 1 0 0 | 1 |
| FBgn0261456 | <b>hpo</b> | FBgn0014163 | <b>fax</b>           | 0 1 0 0 | 1 |
| FBgn0261456 | <b>hpo</b> | FBgn0261524 | <b>lic</b>           | 0 0 1 0 | 1 |
| FBgn0261456 | <b>hpo</b> | FBgn0024183 | <b>vig</b>           | 0 1 0 0 | 1 |
| FBgn0261456 | <b>hpo</b> | FBgn0010333 | <b>Rac1</b>          | 0 1 0 0 | 1 |
| FBgn0261456 | <b>hpo</b> | FBgn0027598 | <b>cindr</b>         | 0 0 0 1 | 1 |
| FBgn0261456 | <b>hpo</b> | FBgn0038224 | <b>CG3321</b>        | 0 0 1 0 | 1 |
| FBgn0261456 | <b>hpo</b> | FBgn0013675 | <b>mt:Coll</b>       | 0 1 0 0 | 1 |
| FBgn0261456 | <b>hpo</b> | FBgn0036131 | <b>CG12522</b>       | 0 0 0 1 | 1 |
| FBgn0261456 | <b>hpo</b> | FBgn0022768 | <b>Pp2C1</b>         | 0 0 1 0 | 1 |
| FBgn0261456 | <b>hpo</b> | FBgn0033264 | <b>Nup50</b>         | 0 1 0 0 | 1 |
| FBgn0261456 | <b>hpo</b> | FBgn0039886 | <b>CG2003</b>        | 0 0 1 0 | 1 |
| FBgn0261456 | <b>hpo</b> | FBgn0263347 | <b>Caf1</b>          | 0 1 0 0 | 1 |
| FBgn0261456 | <b>hpo</b> | FBgn0263350 | <b>alpha-Adaptin</b> | 0 1 0 0 | 1 |
| FBgn0261456 | <b>hpo</b> | FBgn0034110 | <b>Atg9</b>          | 0 0 0 1 | 1 |
| FBgn0261456 | <b>hpo</b> | FBgn0261570 | <b>CG42684</b>       | 0 0 1 0 | 1 |
| FBgn0261456 | <b>hpo</b> | FBgn0011674 | <b>insc</b>          | 0 1 0 0 | 1 |
| FBgn0261456 | <b>hpo</b> | FBgn0015282 | <b>Pros26.4</b>      | 0 1 0 0 | 1 |
| FBgn0261456 | <b>hpo</b> | FBgn0262126 | <b>gho</b>           | 0 0 1 0 | 1 |
| FBgn0261456 | <b>hpo</b> | FBgn0025457 | <b>Bub3</b>          | 0 1 0 0 | 1 |
| FBgn0261456 | <b>hpo</b> | FBgn0024364 | <b>CG11417</b>       | 0 1 0 0 | 1 |
| FBgn0261456 | <b>hpo</b> | FBgn0003206 | <b>Ras64B</b>        | 0 1 0 0 | 1 |
| FBgn0261456 | <b>hpo</b> | FBgn0010173 | <b>RpA-70</b>        | 0 0 1 0 | 1 |
| FBgn0261456 | <b>hpo</b> | FBgn0001105 | <b>Gbeta13F</b>      | 0 1 0 0 | 1 |
| FBgn0261456 | <b>hpo</b> | FBgn0261380 | <b>mRpL37</b>        | 0 1 0 0 | 1 |
| FBgn0261456 | <b>hpo</b> | FBgn0086690 | <b>cp309</b>         | 0 1 0 0 | 1 |
| FBgn0261456 | <b>hpo</b> | FBgn0030098 | <b>CG12057</b>       | 0 1 0 0 | 1 |
| FBgn0261456 | <b>hpo</b> | FBgn0003312 | <b>sad</b>           | 0 1 0 0 | 1 |
| FBgn0261456 | <b>hpo</b> | FBgn0031814 | <b>retm</b>          | 0 0 1 0 | 1 |
| FBgn0261456 | <b>hpo</b> | FBgn0025885 | <b>Inos</b>          | 0 1 0 0 | 1 |
| FBgn0261456 | <b>hpo</b> | FBgn0053988 | <b>CG33988</b>       | 0 0 1 0 | 1 |
| FBgn0261456 | <b>hpo</b> | FBgn0262111 | <b>f</b>             | 0 0 1 0 | 1 |
| FBgn0261456 | <b>hpo</b> | FBgn0030409 | <b>CG15728</b>       | 0 0 0 1 | 1 |
| FBgn0261456 | <b>hpo</b> | FBgn0000100 | <b>RpLP0</b>         | 0 1 0 0 | 1 |
| FBgn0261456 | <b>hpo</b> | FBgn0261509 | <b>haf</b>           | 0 1 0 0 | 1 |
| FBgn0261456 | <b>hpo</b> | FBgn0030087 | <b>CG7766</b>        | 0 1 0 0 | 1 |
| FBgn0261456 | <b>hpo</b> | FBgn0038753 | <b>CG4459</b>        | 0 1 0 0 | 1 |
| FBgn0261456 | <b>hpo</b> | FBgn0029974 | <b>dpr14</b>         | 0 1 0 0 | 1 |
| FBgn0261456 | <b>hpo</b> | FBgn0035872 | <b>CG7185</b>        | 0 0 1 0 | 1 |
| FBgn0261456 | <b>hpo</b> | FBgn0010575 | <b>sbb</b>           | 0 1 0 0 | 1 |
| FBgn0261456 | <b>hpo</b> | FBgn0011726 | <b>tsr</b>           | 0 0 1 0 | 1 |
| FBgn0261456 | <b>hpo</b> | FBgn0053523 | <b>CG33523</b>       | 0 0 1 0 | 1 |
| FBgn0261456 | <b>hpo</b> | FBgn0004143 | <b>nullo</b>         | 0 1 0 0 | 1 |
| FBgn0261456 | <b>hpo</b> | FBgn0032987 | <b>RpL21</b>         | 0 1 0 0 | 1 |
| FBgn0261456 | <b>hpo</b> | FBgn0063493 | <b>GstE7</b>         | 0 1 0 0 | 1 |
| FBgn0261456 | <b>hpo</b> | FBgn0038742 | <b>Arc42</b>         | 0 1 0 0 | 1 |
| FBgn0261456 | <b>hpo</b> | FBgn0262601 | <b>SmB</b>           | 0 1 0 0 | 1 |
| FBgn0261456 | <b>hpo</b> | FBgn0032881 | <b>CG9319</b>        | 0 1 0 0 | 1 |
| FBgn0261456 | <b>hpo</b> | FBgn0037060 | <b>CG10508</b>       | 0 0 0 1 | 1 |
| FBgn0261456 | <b>hpo</b> | FBgn0261710 | <b>nocte</b>         | 0 0 1 0 | 1 |
| FBgn0261456 | <b>hpo</b> | FBgn0023213 | <b>eIF4G</b>         | 0 1 0 0 | 1 |



## (A) entire PPIN

|             |            |             |                   |            |    |
|-------------|------------|-------------|-------------------|------------|----|
| FBgn0261456 | <b>hpo</b> | FBgn0030943 | <b>CG6540</b>     | 0 1 0 0    | 1  |
| FBgn0261456 | <b>hpo</b> | FBgn0025700 | <b>CG5885</b>     | 0 1 0 0    | 1  |
| FBgn0261456 | <b>hpo</b> | FBgn0033464 | <b>CG1441</b>     | 0 1 0 0    | 1  |
| FBgn0261456 | <b>hpo</b> | FBgn0013981 | <b>His4r</b>      | 0 1 0 0    | 1  |
| FBgn0261456 | <b>hpo</b> | FBgn0021847 | <b>I(2)k14710</b> | 0 1 0 0    | 1  |
| FBgn0261456 | <b>hpo</b> | FBgn0039959 | <b>CG17514</b>    | 0 1 0 0    | 1  |
| FBgn0261456 | <b>hpo</b> | FBgn0029687 | <b>Vap-33-1</b>   | 0 0 0 1    | 1  |
| FBgn0261456 | <b>hpo</b> | FBgn0260634 | <b>eIF4G2</b>     | 0 1 0 0    | 1  |
| FBgn0261456 | <b>hpo</b> | FBgn0032240 | <b>CG17768</b>    | 0 1 0 0    | 1  |
| FBgn0261456 | <b>hpo</b> | FBgn0010380 | <b>Bap</b>        | 0 0 1 0    | 1  |
| FBgn0261456 | <b>hpo</b> | FBgn0020369 | <b>Pros45</b>     | 0 0 1 0    | 1  |
| FBgn0261456 | <b>hpo</b> | FBgn0016797 | <b>fz2</b>        | 0 1 0 0    | 1  |
| FBgn0261456 | <b>hpo</b> | FBgn0031209 | <b>Ir21a</b>      | 0 1 0 0    | 1  |
| FBgn0261456 | <b>hpo</b> | FBgn0011703 | <b>RnrL</b>       | 0 0 1 0    | 1  |
| FBgn0261456 | <b>hpo</b> | FBgn0039854 | <b>CG1635</b>     | 0 1 0 0    | 1  |
| FBgn0261456 | <b>hpo</b> | FBgn0040528 | <b>CG15864</b>    | 0 1 0 0    | 1  |
| FBgn0261456 | <b>hpo</b> | FBgn0030594 | <b>CG9509</b>     | 0 1 0 0    | 1  |
| FBgn0261456 | <b>hpo</b> | FBgn0037924 | <b>CG14712</b>    | 0 0 1 0    | 1  |
| FBgn0261456 | <b>hpo</b> | FBgn0004865 | <b>Eip78C</b>     | 0 1 0 0    | 1  |
| FBgn0261456 | <b>hpo</b> | FBgn0032910 | <b>CG9265</b>     | 0 1 0 0    | 1  |
| FBgn0261456 | <b>hpo</b> | FBgn0032035 | <b>CG13393</b>    | 0 0 0 1    | 1  |
| FBgn0261456 | <b>hpo</b> | FBgn0027376 | <b>rha</b>        | 0 0 0 1    | 1  |
| FBgn0261456 | <b>hpo</b> | FBgn0030581 | <b>CG14408</b>    | 0 0 1 0    | 1  |
| FBgn0261456 | <b>hpo</b> | FBgn0003274 | <b>RpLP2</b>      | 0 0 0 1    | 1  |
| FBgn0261456 | <b>hpo</b> | FBgn0039159 | <b>mRpS24</b>     | 0 0 1 0    | 1  |
| FBgn0261456 | <b>hpo</b> | FBgn0035398 | <b>Cht7</b>       | 0 0 1 0    | 1  |
| FBgn0261456 | <b>hpo</b> | FBgn0030177 | <b>CG2972</b>     | 0 1 0 0    | 1  |
| FBgn0261456 | <b>hpo</b> | FBgn0041775 | <b>tral</b>       | 0 1 0 0    | 1  |
| FBgn0261456 | <b>hpo</b> | FBgn0030606 | <b>CG9053</b>     | 0 1 0 0    | 1  |
| FBgn0261456 | <b>hpo</b> | FBgn0032217 | <b>CG4972</b>     | 0 0 1 0    | 1  |
| FBgn0261456 | <b>hpo</b> | FBgn0035753 | <b>RpL18</b>      | 0 0 1 0    | 1  |
| FBgn0261456 | <b>hpo</b> | FBgn0004574 | <b>Rop</b>        | 0 0 0 1    | 1  |
| FBgn0261456 | <b>hpo</b> | FBgn0003386 | <b>Shaw</b>       | 0 1 0 0    | 1  |
| FBgn0261456 | <b>hpo</b> | FBgn0040091 | <b>Ugt58Fa</b>    | 0 0 1 0    | 1  |
| FBgn0261456 | <b>hpo</b> | FBgn0023167 | <b>SmD3</b>       | 0 1 0 0    | 1  |
| FBgn0261456 | <b>hpo</b> | FBgn0028691 | <b>Rpn9</b>       | 0 1 0 0    | 1  |
| FBgn0261456 | <b>hpo</b> | FBgn0038723 | <b>CG6195</b>     | 0 0 0 1    | 1  |
| FBgn0261456 | <b>hpo</b> | FBgn0032880 | <b>CG9318</b>     | 0 0 0 1    | 1  |
| FBgn0261456 | <b>hpo</b> | FBgn0037717 | <b>CG8301</b>     | 0 0 1 0    | 1  |
| FBgn0261456 | <b>hpo</b> | FBgn0001258 | <b>ImpL3</b>      | 0 0 1 0    | 1  |
| FBgn0261456 | <b>hpo</b> | FBgn0033400 | <b>CG2063</b>     | 0 0 0 1    | 1  |
| FBgn0261456 | <b>hpo</b> | FBgn0028670 | <b>Vha100-2</b>   | 0 0 0 1    | 1  |
| FBgn0261456 | <b>hpo</b> | FBgn0036763 | <b>CG7441</b>     | 0 0 1 0    | 1  |
| FBgn0261456 | <b>hpo</b> | FBgn0024509 | <b>sec13</b>      | 0 0 1 0    | 1  |
| FBgn0261456 | <b>hpo</b> | FBgn0037652 | <b>CG11980</b>    | 0 0 1 0    | 1  |
| FBgn0261456 | <b>hpo</b> | FBgn0000406 | <b>Cyt-b5-r</b>   | 0 1 0 0    | 1  |
| FBgn0261456 | <b>hpo</b> | FBgn0029092 | <b>ced-6</b>      | 0 0 1 0    | 1  |
| FBgn0261456 | <b>hpo</b> | FBgn0000317 | <b>ck</b>         | 0 0 0 1    | 1  |
| FBgn0261456 | <b>hpo</b> | FBgn0030797 | <b>CG13004</b>    | 0 0 0 1    | 1  |
| FBgn0001075 | <b>ft</b>  | FBgn0025885 | <b>Inos</b>       | 1 20 20 20 | 60 |
| FBgn0001075 | <b>ft</b>  | FBgn0000064 | <b>Ald</b>        | 1 15 14 18 | 47 |

## (A) entire PPIN

|                |                                  |                    |    |
|----------------|----------------------------------|--------------------|----|
| FBgn0001075 ft | FBgn0028479 <b>CG4389</b>        | 1 15 14 15         | 44 |
| FBgn0001075 ft | FBgn0263350 <b>alpha-Adaptin</b> | 1 10 8 14          | 32 |
| FBgn0001075 ft | FBgn0014029 <b>Sep2</b>          | 1 11 9 11          | 31 |
| FBgn0001075 ft | FBgn0010380 <b>Bap</b>           | 1 9 8 9            | 26 |
| FBgn0001075 ft | FBgn0027835 <b>Dp1</b>           | 1 7 9 8            | 24 |
| FBgn0001075 ft | FBgn0039302 <b>Nup358</b>        | 1 7 6 11           | 24 |
| FBgn0001075 ft | FBgn0010434 <b>cora</b>          | 1 6 6 9            | 21 |
| FBgn0001075 ft | FBgn0037728 <b>CG16817</b>       | 1 7 7 7            | 21 |
| FBgn0001075 ft | FBgn0010909 <b>msn</b>           | 1 9 5 6            | 20 |
| FBgn0001075 ft | FBgn0033339 <b>sec31</b>         | 1 6 5 8            | 19 |
| FBgn0001075 ft | FBgn0261458 <b>capt</b>          | 1 5 6 8            | 19 |
| FBgn0001075 ft | FBgn0261014 <b>TER94</b>         | 1 6 6 7            | 19 |
| FBgn0001075 ft | FBgn0024238 <b>Fim</b>           | 1 5 5 5            | 15 |
| FBgn0001075 ft | FBgn0025352 <b>Thiolase</b>      | <b>0.99</b> 8 7 5  | 20 |
| FBgn0001075 ft | FBgn0034345 <b>CG5174</b>        | <b>0.99</b> 6 5 8  | 19 |
| FBgn0001075 ft | FBgn0039924 <b>CG17471</b>       | <b>0.99</b> 4 7 7  | 18 |
| FBgn0001075 ft | FBgn0031450 <b>Hrs</b>           | <b>0.99</b> 5 4 6  | 15 |
| FBgn0001075 ft | FBgn0029882 <b>CG3226</b>        | <b>0.98</b> 8 4 8  | 20 |
| FBgn0001075 ft | FBgn0033890 <b>Ctf4</b>          | <b>0.98</b> 7 4 8  | 19 |
| FBgn0001075 ft | FBgn0033264 <b>Nup50</b>         | <b>0.98</b> 7 4 4  | 15 |
| FBgn0001075 ft | FBgn0003346 <b>RanGap</b>        | <b>0.98</b> 4 6 4  | 14 |
| FBgn0001075 ft | FBgn0023213 <b>eIF4G</b>         | <b>0.97</b> 7 6 4  | 17 |
| FBgn0001075 ft | FBgn0011704 <b>RnrS</b>          | <b>0.94</b> 4 3 4  | 11 |
| FBgn0001075 ft | FBgn0022343 <b>CG3760</b>        | <b>0.93</b> 6 3 4  | 13 |
| FBgn0001075 ft | FBgn0029687 <b>Vap-33-1</b>      | <b>0.92</b> 3 3 6  | 12 |
| FBgn0001075 ft | FBgn0013726 <b>pnut</b>          | <b>0.91</b> 7 9 13 | 29 |
| FBgn0001075 ft | FBgn0000578 <b>ena</b>           | <b>0.91</b> 3 3 4  | 10 |
| FBgn0001075 ft | FBgn0063485 <b>Lasp</b>          | <b>0.9</b> 5 3 5   | 13 |
| FBgn0001075 ft | FBgn0025865 <b>Cortactin</b>     | <b>0.9</b> 3 3 5   | 11 |
| FBgn0001075 ft | FBgn0038965 <b>mats</b>          | <b>0.89</b> 3 5 8  | 16 |
| FBgn0001075 ft | FBgn0003600 <b>Su(var)3-9</b>    | <b>0.89</b> 6 3 3  | 12 |
| FBgn0001075 ft | FBgn0003392 <b>shi</b>           | <b>0.88</b> 4 3 3  | 10 |
| FBgn0001075 ft | FBgn0024509 <b>sec13</b>         | <b>0.88</b> 3 3 3  | 9  |
| FBgn0001075 ft | FBgn0011771 <b>Hem</b>           | <b>0.87</b> 4 4 3  | 11 |
| FBgn0001075 ft | FBgn0035424 <b>CG11505</b>       | <b>0.86</b> 6 5 6  | 17 |
| FBgn0001075 ft | FBgn0025457 <b>Bub3</b>          | <b>0.83</b> 4 2 4  | 10 |
| FBgn0001075 ft | FBgn0261119 <b>Prp19</b>         | <b>0.81</b> 5 2 3  | 10 |
| FBgn0001075 ft | FBgn0004378 <b>Klp61F</b>        | <b>0.79</b> 3 2 5  | 10 |
| FBgn0001075 ft | FBgn0037607 <b>CG8036</b>        | <b>0.78</b> 3 3 3  | 9  |
| FBgn0001075 ft | FBgn0263351 <b>AP-50</b>         | <b>0.74</b> 4 2 3  | 9  |
| FBgn0001075 ft | FBgn0032961 <b>CG1416</b>        | <b>0.73</b> 3 4 2  | 9  |
| FBgn0001075 ft | FBgn0261552 <b>ps</b>            | <b>0.71</b> 4 2 3  | 9  |
| FBgn0001075 ft | FBgn0034118 <b>Nup62</b>         | <b>0.71</b> 2 3 3  | 8  |
| FBgn0001075 ft | FBgn0027598 <b>cindr</b>         | <b>0.7</b> 7 2 6   | 15 |
| FBgn0001075 ft | FBgn0033029 <b>I(2)NC136</b>     | <b>0.7</b> 3 1 4   | 8  |
| FBgn0001075 ft | FBgn0261385 <b>scra</b>          | <b>0.69</b> 4 3 4  | 11 |
| FBgn0001075 ft | FBgn0020279 <b>lig</b>           | <b>0.68</b> 10 9 7 | 26 |
| FBgn0001075 ft | FBgn0026409 <b>Mpcp</b>          | <b>0.66</b> 4 2 4  | 10 |
| FBgn0001075 ft | FBgn0263594 <b>lost</b>          | <b>0.66</b> 3 2 3  | 8  |
| FBgn0001075 ft | FBgn0025724 <b>beta'Cop</b>      | <b>0.62</b> 2 2 2  | 6  |
| FBgn0001075 ft | FBgn0043456 <b>CG4747</b>        | <b>0.62</b> 2 2 2  | 6  |

## (A) entire PPIN

|                |                               |                     |    |
|----------------|-------------------------------|---------------------|----|
| FBgn0001075 ft | FBgn0034646 <b>Rae1</b>       | <b>0.61</b> 2 4 1   | 7  |
| FBgn0001075 ft | FBgn0010660 <b>Nup214</b>     | <b>0.6</b> 5 2 4    | 11 |
| FBgn0001075 ft | FBgn0027363 <b>Stam</b>       | <b>0.6</b> 2 2 5    | 9  |
| FBgn0001075 ft | FBgn0005630 <b>lola</b>       | <b>0.6</b> 2 2 2    | 6  |
| FBgn0001075 ft | FBgn0041775 <b>tral</b>       | <b>0.59</b> 3 3 5   | 11 |
| FBgn0001075 ft | FBgn0259139 <b>glo</b>        | <b>0.59</b> 2 1 4   | 7  |
| FBgn0001075 ft | FBgn0013334 <b>Sap47</b>      | <b>0.59</b> 3 1 3   | 7  |
| FBgn0001075 ft | FBgn0005648 <b>Pabp2</b>      | <b>0.58</b> 3 1 2   | 6  |
| FBgn0001075 ft | FBgn0027066 <b>Eb1</b>        | <b>0.57</b> 12 8 13 | 33 |
| FBgn0001075 ft | FBgn0037810 <b>sle</b>        | <b>0.55</b> 4 2 1   | 7  |
| FBgn0001075 ft | FBgn0010488 <b>NAT1</b>       | <b>0.55</b> 2 1 3   | 6  |
| FBgn0001075 ft | FBgn0022288 <b>I(2)09851</b>  | <b>0.54</b> 3 1 4   | 8  |
| FBgn0001075 ft | FBgn0260939 <b>Sgt1</b>       | <b>0.54</b> 3 1 2   | 6  |
| FBgn0001075 ft | FBgn0037182 <b>CG6838</b>     | <b>0.54</b> 1 2 2   | 5  |
| FBgn0001075 ft | FBgn0263006 <b>Ca-P60A</b>    | <b>0.53</b> 3 1 4   | 8  |
| FBgn0001075 ft | FBgn0261618 <b>larp</b>       | <b>0.52</b> 0 2 3   | 5  |
| FBgn0001075 ft | FBgn0014870 <b>Psi</b>        | <b>0.5</b> 3 1 3    | 7  |
| FBgn0001075 ft | FBgn0033235 <b>CG8728</b>     | <b>0.49</b> 1 2 4   | 7  |
| FBgn0001075 ft | FBgn0027603 <b>Ulp1</b>       | <b>0.48</b> 2 1 2   | 5  |
| FBgn0001075 ft | FBgn0028692 <b>Rpn2</b>       | <b>0.47</b> 1 2 5   | 8  |
| FBgn0001075 ft | FBgn0034138 <b>RpS15</b>      | <b>0.45</b> 2 1 2   | 5  |
| FBgn0001075 ft | FBgn0028737 <b>Ef1beta</b>    | <b>0.44</b> 6 6 8   | 20 |
| FBgn0001075 ft | FBgn0015907 <b>bl</b>         | <b>0.44</b> 1 1 4   | 6  |
| FBgn0001075 ft | FBgn0031878 <b>sip2</b>       | <b>0.43</b> 2 1 3   | 6  |
| FBgn0001075 ft | FBgn0036685 <b>CG6664</b>     | <b>0.43</b> 2 0 4   | 6  |
| FBgn0001075 ft | FBgn0029897 <b>RpL17</b>      | <b>0.43</b> 1 2 1   | 4  |
| FBgn0001075 ft | FBgn0025725 <b>alphaCop</b>   | <b>0.41</b> 3 4 10  | 17 |
| FBgn0001075 ft | FBgn0002780 <b>mod</b>        | <b>0.4</b> 9 10 9   | 28 |
| FBgn0001075 ft | FBgn0037912 <b>sea</b>        | <b>0.4</b> 2 1 1    | 4  |
| FBgn0001075 ft | FBgn0261792 <b>snRNP-U1-C</b> | <b>0.39</b> 1 2 1   | 4  |
| FBgn0001075 ft | FBgn0015024 <b>Cklalpha</b>   | <b>0.38</b> 0 4 1   | 5  |
| FBgn0001075 ft | FBgn0053113 <b>Rtnl1</b>      | <b>0.38</b> 1 2 1   | 4  |
| FBgn0001075 ft | FBgn0010235 <b>Klc</b>        | <b>0.37</b> 2 1 2   | 5  |
| FBgn0001075 ft | FBgn0011571 <b>caz</b>        | <b>0.37</b> 1 2 1   | 4  |
| FBgn0001075 ft | FBgn0031453 <b>CG9894</b>     | <b>0.37</b> 2 0 2   | 4  |
| FBgn0001075 ft | FBgn0260442 <b>rhea</b>       | <b>0.36</b> 3 1 4   | 8  |
| FBgn0001075 ft | FBgn0004397 <b>Vinc</b>       | <b>0.36</b> 2 1 3   | 6  |
| FBgn0001075 ft | FBgn0034433 <b>endoB</b>      | <b>0.33</b> 1 2 1   | 4  |
| FBgn0001075 ft | FBgn0023167 <b>SmD3</b>       | <b>0.32</b> 1 2 1   | 4  |
| FBgn0001075 ft | FBgn0023517 <b>Pgam5</b>      | <b>0.32</b> 1 0 2   | 3  |
| FBgn0001075 ft | FBgn0034368 <b>CG5482</b>     | <b>0.31</b> 2 1 1   | 4  |
| FBgn0001075 ft | FBgn0002413 <b>dco</b>        | <b>0.31</b> 1 1 2   | 4  |
| FBgn0001075 ft | FBgn0029174 <b>FKBP59</b>     | <b>0.31</b> 2 1 1   | 4  |
| FBgn0001075 ft | FBgn0029676 <b>HIP-R</b>      | <b>0.31</b> 2 1 1   | 4  |
| FBgn0001075 ft | FBgn0005649 <b>Rox8</b>       | <b>0.3</b> 0 1 2    | 3  |
| FBgn0001075 ft | FBgn0033349 <b>CG8243</b>     | <b>0.29</b> 3 0 1   | 4  |
| FBgn0001075 ft | FBgn0038476 <b>kuk</b>        | <b>0.29</b> 1 0 2   | 3  |
| FBgn0001075 ft | FBgn0022893 <b>Df31</b>       | <b>0.29</b> 2 0 1   | 3  |
| FBgn0001075 ft | FBgn0034237 <b>eIF3-S9</b>    | <b>0.28</b> 2 1 3   | 6  |
| FBgn0001075 ft | FBgn0014163 <b>fax</b>        | <b>0.28</b> 1 0 2   | 3  |
| FBgn0001075 ft | FBgn0086443 <b>Aats-asn</b>   | <b>0.27</b> 1 0 2   | 3  |

## (A) entire PPIN

|                |                                 |                      |    |
|----------------|---------------------------------|----------------------|----|
| FBgn0001075 ft | FBgn0051617 <b>His1:CG31617</b> | <b>0.27</b> 1 0 2    | 3  |
| FBgn0001075 ft | FBgn0039359 <b>RpL27</b>        | <b>0.26</b> 1 0 2    | 3  |
| FBgn0001075 ft | FBgn0028734 <b>Fmr1</b>         | <b>0.24</b> 5 5 9    | 19 |
| FBgn0001075 ft | FBgn0037051 <b>CG10565</b>      | <b>0.24</b> 0 2 2    | 4  |
| FBgn0001075 ft | FBgn0013269 <b>FK506-bp1</b>    | <b>0.23</b> 4 3 1    | 8  |
| FBgn0001075 ft | FBgn0001139 <b>gro</b>          | <b>0.23</b> 0 2 2    | 4  |
| FBgn0001075 ft | FBgn0036354 <b>Poc1</b>         | <b>0.22</b> 0 2 1    | 3  |
| FBgn0001075 ft | FBgn0033844 <b>bbc</b>          | <b>0.2</b> 1 1 2     | 4  |
| FBgn0001075 ft | FBgn0261606 <b>RpL27A</b>       | <b>0.19</b> 0 0 2    | 2  |
| FBgn0001075 ft | FBgn0261789 <b>SmD2</b>         | <b>0.18</b> 0 0 2    | 2  |
| FBgn0001075 ft | FBgn0034258 <b>eIF3-S8</b>      | <b>0.17</b> 1 2 1    | 4  |
| FBgn0001075 ft | FBgn0035060 <b>Eps-15</b>       | <b>0.17</b> 0 1 2    | 3  |
| FBgn0001075 ft | FBgn0000115 <b>Arf72A</b>       | <b>0.17</b> 0 0 2    | 2  |
| FBgn0001075 ft | FBgn0035830 <b>CG8209</b>       | <b>0.17</b> 0 2 0    | 2  |
| FBgn0001075 ft | FBgn0026207 <b>mbo</b>          | <b>0.16</b> 1 0 2    | 3  |
| FBgn0001075 ft | FBgn0015218 <b>eIF-4E</b>       | <b>0.16</b> 1 0 2    | 3  |
| FBgn0001075 ft | FBgn0043012 <b>AP-2sigma</b>    | <b>0.16</b> 0 2 0    | 2  |
| FBgn0001075 ft | FBgn0002645 <b>Map205</b>       | <b>0.15</b> 14 15 14 | 43 |
| FBgn0001075 ft | FBgn0011710 <b>Sep1</b>         | <b>0.15</b> 8 8 8    | 24 |
| FBgn0001075 ft | FBgn0020255 <b>ran</b>          | <b>0.15</b> 2 2 2    | 6  |
| FBgn0001075 ft | FBgn0035425 <b>CG17746</b>      | <b>0.15</b> 0 2 0    | 2  |
| FBgn0001075 ft | FBgn0030011 <b>Gbeta5</b>       | <b>0.15</b> 0 0 2    | 2  |
| FBgn0001075 ft | FBgn0041188 <b>Atx2</b>         | <b>0.14</b> 3 1 2    | 6  |
| FBgn0001075 ft | FBgn0035499 <b>Chd64</b>        | <b>0.13</b> 15 10 16 | 41 |
| FBgn0001075 ft | FBgn0002783 <b>mor</b>          | <b>0.13</b> 2 0 2    | 4  |
| FBgn0001075 ft | FBgn0038320 <b>Sra-1</b>        | <b>0.11</b> 1 2 1    | 4  |
| FBgn0001075 ft | FBgn0033109 <b>coro</b>         | <b>0.11</b> 0 2 0    | 2  |
| FBgn0001075 ft | FBgn0037137 <b>Nopp140</b>      | <b>0.1</b> 2 2 2     | 6  |
| FBgn0001075 ft | FBgn0052549 <b>CG32549</b>      | <b>0.1</b> 2 0 0     | 2  |
| FBgn0001075 ft | FBgn0250814 <b>CG4169</b>       | <b>0.09</b> 5 7 6    | 18 |
| FBgn0001075 ft | FBgn0005533 <b>RpS17</b>        | <b>0.09</b> 2 2 2    | 6  |
| FBgn0001075 ft | FBgn0000181 <b>bic</b>          | <b>0.08</b> 6 3 9    | 18 |
| FBgn0001075 ft | FBgn0046214 <b>vig2</b>         | <b>0.08</b> 4 3 3    | 10 |
| FBgn0001075 ft | FBgn0260990 <b>yata</b>         | <b>0.08</b> 0 2 0    | 2  |
| FBgn0001075 ft | FBgn0051320 <b>CG31320</b>      | <b>0.08</b> 2 0 0    | 2  |
| FBgn0001075 ft | FBgn0032518 <b>RpL24</b>        | <b>0.07</b> 2 2 2    | 6  |
| FBgn0001075 ft | FBgn0020910 <b>RpL3</b>         | <b>0.06</b> 1 1 2    | 4  |
| FBgn0001075 ft | FBgn0029903 <b>pod1</b>         | <b>0.06</b> 1 1 2    | 4  |
| FBgn0001075 ft | FBgn0033062 <b>Ars2</b>         | <b>0.06</b> 2 0 1    | 3  |
| FBgn0001075 ft | FBgn0024183 <b>vig</b>          | <b>0.06</b> 0 0 2    | 2  |
| FBgn0001075 ft | FBgn0083969 <b>CG34133</b>      | <b>0.06</b> 0 0 2    | 2  |
| FBgn0001075 ft | FBgn0263391 <b>hts</b>          | <b>0.05</b> 5 5 10   | 20 |
| FBgn0001075 ft | FBgn0010411 <b>RpS18</b>        | <b>0.05</b> 1 1 2    | 4  |
| FBgn0001075 ft | FBgn0039562 <b>Gp93</b>         | <b>0.05</b> 2 0 1    | 3  |
| FBgn0001075 ft | FBgn0051363 <b>Jupiter</b>      | <b>0.03</b> 5 6 5    | 16 |
| FBgn0001075 ft | FBgn0015268 <b>Nap1</b>         | <b>0.03</b> 2 2 2    | 6  |
| FBgn0001075 ft | FBgn0028687 <b>Rpt1</b>         | <b>0.02</b> 3 3 3    | 9  |
| FBgn0001075 ft | FBgn0001217 <b>Hsc70-2</b>      | <b>0.02</b> 2 3 3    | 8  |
| FBgn0001075 ft | FBgn0261609 <b>eIF-2alpha</b>   | <b>0.02</b> 2 2 3    | 7  |
| FBgn0001075 ft | FBgn0017545 <b>RpS3A</b>        | <b>0.02</b> 1 0 3    | 4  |
| FBgn0001075 ft | FBgn0263396 <b>sqd</b>          | <b>0.01</b> 5 6 5    | 16 |

## (A) entire PPIN

|                |                                |                     |     |
|----------------|--------------------------------|---------------------|-----|
| FBgn0001075 ft | FBgn0025286 <b>RpL31</b>       | <b>0.01</b> 2 2 3   | 7   |
| FBgn0001075 ft | FBgn0030136 <b>RpS28b</b>      | <b>0.01</b> 2 1 1   | 4   |
| FBgn0001075 ft | FBgn0263106 <b>DnaJ-1</b>      | <b>0.01</b> 1 1 2   | 4   |
| FBgn0001075 ft | FBgn0010265 <b>RpS13</b>       | <b>0.01</b> 2 0 1   | 3   |
| FBgn0001075 ft | FBgn0005634 <b>zip</b>         | <b>0</b> 149 76 128 | 353 |
| FBgn0001075 ft | FBgn0001219 <b>Hsc70-4</b>     | <b>0</b> 59 60 71   | 190 |
| FBgn0001075 ft | FBgn0001218 <b>Hsc70-3</b>     | <b>0</b> 37 32 37   | 106 |
| FBgn0001075 ft | FBgn0000556 <b>Ef1alpha48D</b> | <b>0</b> 32 29 34   | 95  |
| FBgn0001075 ft | FBgn0003887 <b>betaTub56D</b>  | <b>0</b> 25 25 26   | 76  |
| FBgn0001075 ft | FBgn0000042 <b>Act5C</b>       | <b>0</b> 26 24 25   | 75  |
| FBgn0001075 ft | FBgn0003884 <b>alphaTub84B</b> | <b>0</b> 18 15 22   | 55  |
| FBgn0001075 ft | FBgn0261710 <b>nocte</b>       | <b>0</b> 18 12 18   | 48  |
| FBgn0001075 ft | FBgn0029176 <b>Ef1gamma</b>    | <b>0</b> 10 10 16   | 36  |
| FBgn0001075 ft | FBgn0263231 <b>bel</b>         | <b>0</b> 12 12 12   | 36  |
| FBgn0001075 ft | FBgn0003178 <b>PyK</b>         | <b>0</b> 8 12 10    | 30  |
| FBgn0001075 ft | FBgn0003360 <b>sesB</b>        | <b>0</b> 9 8 12     | 29  |
| FBgn0001075 ft | FBgn0002525 <b>Lam</b>         | <b>0</b> 14 5 10    | 29  |
| FBgn0001075 ft | FBgn0261619 <b>pAbp</b>        | <b>0</b> 9 10 10    | 29  |
| FBgn0001075 ft | FBgn0262603 <b>sec8</b>        | <b>0</b> 17 6 5     | 28  |
| FBgn0001075 ft | FBgn0015778 <b>rin</b>         | <b>0</b> 7 9 11     | 27  |
| FBgn0001075 ft | FBgn0004687 <b>Mlc-c</b>       | <b>0</b> 11 8 8     | 27  |
| FBgn0001075 ft | FBgn0037891 <b>CG5214</b>      | <b>0</b> 8 8 10     | 26  |
| FBgn0001075 ft | FBgn0002622 <b>RpS3</b>        | <b>0</b> 8 6 10     | 24  |
| FBgn0001075 ft | FBgn0011284 <b>RpS4</b>        | <b>0</b> 8 6 9      | 23  |
| FBgn0001075 ft | FBgn0003514 <b>sqh</b>         | <b>0</b> 8 7 7      | 22  |
| FBgn0001075 ft | FBgn0000559 <b>Ef2b</b>        | <b>0</b> 7 6 8      | 21  |
| FBgn0001075 ft | FBgn0000709 <b>flil</b>        | <b>0</b> 8 5 8      | 21  |
| FBgn0001075 ft | FBgn0034743 <b>RpS16</b>       | <b>0</b> 7 6 8      | 21  |
| FBgn0001075 ft | FBgn0001216 <b>Hsc70-1</b>     | <b>0</b> 6 7 8      | 21  |
| FBgn0001075 ft | FBgn0001233 <b>Hsp83</b>       | <b>0</b> 7 3 10     | 20  |
| FBgn0001075 ft | FBgn0039757 <b>RpS7</b>        | <b>0</b> 9 3 8      | 20  |
| FBgn0001075 ft | FBgn0001220 <b>Hsc70-5</b>     | <b>0</b> 6 4 9      | 19  |
| FBgn0001075 ft | FBgn0003888 <b>betaTub60D</b>  | <b>0</b> 5 6 7      | 18  |
| FBgn0001075 ft | FBgn0003676 <b>T-cp1</b>       | <b>0</b> 6 8 4      | 18  |
| FBgn0001075 ft | FBgn0262734 <b>Rbp2</b>        | <b>0</b> 7 4 7      | 18  |
| FBgn0001075 ft | FBgn0030699 <b>CG8578</b>      | <b>0</b> 7 3 7      | 17  |
| FBgn0001075 ft | FBgn0004237 <b>Hrb87F</b>      | <b>0</b> 5 4 5      | 14  |
| FBgn0001075 ft | FBgn0000258 <b>Ckl1alpha</b>   | <b>0</b> 6 4 4      | 14  |
| FBgn0001075 ft | FBgn0035608 <b>blanks</b>      | <b>0</b> 5 4 4      | 13  |
| FBgn0001075 ft | FBgn0000044 <b>Act57B</b>      | <b>0</b> 5 3 3      | 11  |
| FBgn0001075 ft | FBgn0011211 <b>blw</b>         | <b>0</b> 4 3 4      | 11  |
| FBgn0001075 ft | FBgn0003721 <b>Tm1</b>         | <b>0</b> 8 0 3      | 11  |
| FBgn0001075 ft | FBgn0004403 <b>RpS14a</b>      | <b>0</b> 4 2 5      | 11  |
| FBgn0001075 ft | FBgn0003261 <b>Rm62</b>        | <b>0</b> 3 2 6      | 11  |
| FBgn0001075 ft | FBgn0003022 <b>Ote</b>         | <b>0</b> 3 3 5      | 11  |
| FBgn0001075 ft | FBgn0261593 <b>RpS10b</b>      | <b>0</b> 3 4 3      | 10  |
| FBgn0001075 ft | FBgn0010246 <b>Myo61F</b>      | <b>0</b> 4 2 4      | 10  |
| FBgn0001075 ft | FBgn0015834 <b>Trip1</b>       | <b>0</b> 5 2 3      | 10  |
| FBgn0001075 ft | FBgn0042134 <b>Capr</b>        | <b>0</b> 3 3 4      | 10  |
| FBgn0001075 ft | FBgn0003890 <b>betaTub97EF</b> | <b>0</b> 3 3 3      | 9   |
| FBgn0001075 ft | FBgn0028969 <b>deltaCOP</b>    | <b>0</b> 2 3 4      | 9   |

## (A) entire PPIN

|                |                               |         |   |
|----------------|-------------------------------|---------|---|
| FBgn0001075 ft | FBgn0032731 <b>CG10641</b>    | 0 4 0 4 | 8 |
| FBgn0001075 ft | FBgn0001942 <b>eIF-4a</b>     | 0 2 2 4 | 8 |
| FBgn0001075 ft | FBgn0034577 <b>cpa</b>        | 0 3 2 3 | 8 |
| FBgn0001075 ft | FBgn0001215 <b>Hrb98DE</b>    | 0 3 2 3 | 8 |
| FBgn0001075 ft | FBgn0053303 <b>CG33303</b>    | 0 3 3 1 | 7 |
| FBgn0001075 ft | FBgn0086904 <b>Nacalpa</b>    | 0 1 3 3 | 7 |
| FBgn0001075 ft | FBgn0010078 <b>RpL23</b>      | 0 3 1 3 | 7 |
| FBgn0001075 ft | FBgn0004867 <b>RpS2</b>       | 0 3 2 2 | 7 |
| FBgn0001075 ft | FBgn0014189 <b>Hel25E</b>     | 0 2 2 2 | 6 |
| FBgn0001075 ft | FBgn0010408 <b>RpS9</b>       | 0 2 2 2 | 6 |
| FBgn0001075 ft | FBgn0036213 <b>RpL10Ab</b>    | 0 1 3 2 | 6 |
| FBgn0001075 ft | FBgn0038145 <b>Droj2</b>      | 0 2 2 2 | 6 |
| FBgn0001075 ft | FBgn0027932 <b>Akap200</b>    | 0 2 2 2 | 6 |
| FBgn0001075 ft | FBgn0015756 <b>RpL9</b>       | 0 3 1 2 | 6 |
| FBgn0001075 ft | FBgn0039300 <b>RpS27</b>      | 0 2 1 2 | 5 |
| FBgn0001075 ft | FBgn0010198 <b>RpS15Aa</b>    | 0 1 1 3 | 5 |
| FBgn0001075 ft | FBgn0027329 <b>Tcp-1zeta</b>  | 0 0 2 3 | 5 |
| FBgn0001075 ft | FBgn0019936 <b>RpS20</b>      | 0 1 1 3 | 5 |
| FBgn0001075 ft | FBgn0004838 <b>Hrb27C</b>     | 0 2 1 2 | 5 |
| FBgn0001075 ft | FBgn0250789 <b>alpha-Spec</b> | 0 2 1 1 | 4 |
| FBgn0001075 ft | FBgn0029093 <b>cathD</b>      | 0 1 2 1 | 4 |
| FBgn0001075 ft | FBgn0030993 <b>Mec2</b>       | 0 2 1 1 | 4 |
| FBgn0001075 ft | FBgn0004167 <b>kst</b>        | 0 1 2 1 | 4 |
| FBgn0001075 ft | FBgn0004363 <b>porin</b>      | 0 0 0 4 | 4 |
| FBgn0001075 ft | FBgn0261933 <b>SmD1</b>       | 0 1 1 1 | 3 |
| FBgn0001075 ft | FBgn0053094 <b>Synd</b>       | 0 1 1 1 | 3 |
| FBgn0001075 ft | FBgn0261596 <b>RpS24</b>      | 0 1 1 1 | 3 |
| FBgn0001075 ft | FBgn0262735 <b>Imp</b>        | 0 1 1 1 | 3 |
| FBgn0001075 ft | FBgn0082582 <b>tmod</b>       | 0 2 0 1 | 3 |
| FBgn0001075 ft | FBgn0036919 <b>Grasp65</b>    | 0 1 1 1 | 3 |
| FBgn0001075 ft | FBgn0261397 <b>didum</b>      | 0 3 0 0 | 3 |
| FBgn0001075 ft | FBgn0027494 <b>RpS10a</b>     | 0 1 1 1 | 3 |
| FBgn0001075 ft | FBgn0031868 <b>Rat1</b>       | 0 1 1 1 | 3 |
| FBgn0001075 ft | FBgn0027948 <b>msps</b>       | 0 1 1 1 | 3 |
| FBgn0001075 ft | FBgn0032859 <b>Arc-p34</b>    | 0 2 1 0 | 3 |
| FBgn0001075 ft | FBgn0031990 <b>CG8552</b>     | 0 1 1 1 | 3 |
| FBgn0001075 ft | FBgn0034068 <b>casp</b>       | 0 1 1 1 | 3 |
| FBgn0001075 ft | FBgn0029118 <b>Sucb</b>       | 0 1 0 2 | 3 |
| FBgn0001075 ft | FBgn0039229 <b>Saf-B</b>      | 0 1 1 1 | 3 |
| FBgn0001075 ft | FBgn0041789 <b>Pax</b>        | 0 1 1 1 | 3 |
| FBgn0001075 ft | FBgn0037468 <b>CG1943</b>     | 0 1 1 1 | 3 |
| FBgn0001075 ft | FBgn0261279 <b>lqfR</b>       | 0 1 1 1 | 3 |
| FBgn0001075 ft | FBgn0031256 <b>CG4164</b>     | 0 2 1 0 | 3 |
| FBgn0001075 ft | FBgn0028968 <b>gammaCop</b>   | 0 1 1 1 | 3 |
| FBgn0001075 ft | FBgn0035772 <b>Sh3beta</b>    | 0 1 1 1 | 3 |
| FBgn0001075 ft | FBgn0040007 <b>RpL38</b>      | 0 1 1 1 | 3 |
| FBgn0001075 ft | FBgn0020618 <b>Rack1</b>      | 0 1 1 1 | 3 |
| FBgn0001075 ft | FBgn0262601 <b>SmB</b>        | 0 1 1 1 | 3 |
| FBgn0001075 ft | FBgn0033740 <b>dgt5</b>       | 0 0 2 1 | 3 |
| FBgn0001075 ft | FBgn0040273 <b>Spt5</b>       | 0 1 1 1 | 3 |
| FBgn0001075 ft | FBgn0032240 <b>CG17768</b>    | 0 1 1 1 | 3 |

## (A) entire PPIN

|                |                                |         |   |
|----------------|--------------------------------|---------|---|
| FBgn0001075 ft | FBgn0086372 <b>lap</b>         | 0 1 1 1 | 3 |
| FBgn0001075 ft | FBgn0032340 <b>Ge-1</b>        | 0 1 1 1 | 3 |
| FBgn0001075 ft | FBgn0262707 <b>CTPsyn</b>      | 0 1 1 1 | 3 |
| FBgn0001075 ft | FBgn0037746 <b>CG8478</b>      | 0 1 1 1 | 3 |
| FBgn0001075 ft | FBgn0087035 <b>AGO2</b>        | 0 1 1 1 | 3 |
| FBgn0001075 ft | FBgn0038747 <b>RhoGAP92B</b>   | 0 1 1 1 | 3 |
| FBgn0001075 ft | FBgn0013325 <b>RpL11</b>       | 0 1 1 1 | 3 |
| FBgn0001075 ft | FBgn0011570 <b>cpb</b>         | 0 1 0 2 | 3 |
| FBgn0001075 ft | FBgn0010774 <b>Aly</b>         | 0 1 1 1 | 3 |
| FBgn0001075 ft | FBgn0003941 <b>RpL40</b>       | 0 1 0 2 | 3 |
| FBgn0001075 ft | FBgn0036372 <b>CG10083</b>     | 0 1 1 1 | 3 |
| FBgn0001075 ft | FBgn0000253 <b>Cam</b>         | 0 2 0 1 | 3 |
| FBgn0001075 ft | FBgn0015376 <b>cutlet</b>      | 0 1 0 1 | 2 |
| FBgn0001075 ft | FBgn0040237 <b>bor</b>         | 0 1 0 1 | 2 |
| FBgn0001075 ft | FBgn0004556 <b>Dbp73D</b>      | 0 1 0 1 | 2 |
| FBgn0001075 ft | FBgn0041180 <b>TepIV</b>       | 0 1 0 1 | 2 |
| FBgn0001075 ft | FBgn0028577 <b>pUf68</b>       | 0 1 0 1 | 2 |
| FBgn0001075 ft | FBgn0044324 <b>Chro</b>        | 0 1 0 1 | 2 |
| FBgn0001075 ft | FBgn0010217 <b>ATPsyn-beta</b> | 0 0 1 1 | 2 |
| FBgn0001075 ft | FBgn0262716 <b>Arp66B</b>      | 0 1 0 1 | 2 |
| FBgn0001075 ft | FBgn0003138 <b>Ptp61F</b>      | 0 1 0 1 | 2 |
| FBgn0001075 ft | FBgn0030141 <b>Gga</b>         | 0 0 1 1 | 2 |
| FBgn0001075 ft | FBgn0034921 <b>Dcp1</b>        | 0 1 1 0 | 2 |
| FBgn0001075 ft | FBgn0010348 <b>Arf79F</b>      | 0 1 0 1 | 2 |
| FBgn0001075 ft | FBgn0035987 <b>CG3689</b>      | 0 1 1 0 | 2 |
| FBgn0001075 ft | FBgn0030268 <b>Klp10A</b>      | 0 1 0 1 | 2 |
| FBgn0001075 ft | FBgn0037657 <b>hyx</b>         | 0 1 0 1 | 2 |
| FBgn0001075 ft | FBgn0002466 <b>sti</b>         | 0 1 0 1 | 2 |
| FBgn0001075 ft | FBgn0015245 <b>Hsp60</b>       | 0 1 0 1 | 2 |
| FBgn0001075 ft | FBgn0038950 <b>CG5382</b>      | 0 0 1 1 | 2 |
| FBgn0001075 ft | FBgn0039776 <b>PH4alphaEFB</b> | 0 1 1 0 | 2 |
| FBgn0001075 ft | FBgn0010342 <b>Map60</b>       | 0 0 1 1 | 2 |
| FBgn0001075 ft | FBgn0030520 <b>CG10990</b>     | 0 1 0 1 | 2 |
| FBgn0001075 ft | FBgn0050122 <b>CG30122</b>     | 0 1 0 1 | 2 |
| FBgn0001075 ft | FBgn0030672 <b>CG9281</b>      | 0 1 0 1 | 2 |
| FBgn0001075 ft | FBgn0037624 <b>CG8223</b>      | 0 1 1 0 | 2 |
| FBgn0001075 ft | FBgn0024987 <b>ssx</b>         | 0 1 0 1 | 2 |
| FBgn0001075 ft | FBgn0036918 <b>CG7770</b>      | 0 1 1 0 | 2 |
| FBgn0001075 ft | FBgn0032454 <b>CG5787</b>      | 0 0 1 1 | 2 |
| FBgn0001075 ft | FBgn0033179 <b>p47</b>         | 0 0 1 1 | 2 |
| FBgn0001075 ft | FBgn0039969 <b>Fis1</b>        | 0 0 1 1 | 2 |
| FBgn0001075 ft | FBgn0002542 <b>lds</b>         | 0 1 0 1 | 2 |
| FBgn0001075 ft | FBgn0026761 <b>Trap1</b>       | 0 1 0 1 | 2 |
| FBgn0001075 ft | FBgn0034968 <b>RpL12</b>       | 0 0 1 1 | 2 |
| FBgn0001075 ft | FBgn0261794 <b>kcc</b>         | 0 1 0 1 | 2 |
| FBgn0001075 ft | FBgn0026777 <b>Rad23</b>       | 0 0 1 1 | 2 |
| FBgn0001075 ft | FBgn0010173 <b>RpA-70</b>      | 0 1 0 1 | 2 |
| FBgn0001075 ft | FBgn0011823 <b>Pen</b>         | 0 1 0 1 | 2 |
| FBgn0001075 ft | FBgn0037249 <b>eIF3-S10</b>    | 0 1 0 1 | 2 |
| FBgn0001075 ft | FBgn0010516 <b>wal</b>         | 0 1 1 0 | 2 |
| FBgn0001075 ft | FBgn0015288 <b>RpL22</b>       | 0 1 0 1 | 2 |

## (A) entire PPIN

|                |                                     |         |   |
|----------------|-------------------------------------|---------|---|
| FBgn0001075 ft | FBgn0014007 <b>Ptp69D</b>           | 0 1 1 0 | 2 |
| FBgn0001075 ft | FBgn0021795 <b>Tapdelta</b>         | 0 1 0 1 | 2 |
| FBgn0001075 ft | FBgn0035471 <b>Sc2</b>              | 0 0 1 1 | 2 |
| FBgn0001075 ft | FBgn0033226 <b>CG1882</b>           | 0 1 0 1 | 2 |
| FBgn0001075 ft | FBgn0043884 <b>mask</b>             | 0 0 1 1 | 2 |
| FBgn0001075 ft | FBgn0260748 <b>CG5004</b>           | 0 0 1 1 | 2 |
| FBgn0001075 ft | FBgn0011259 <b>Sema-1a</b>          | 0 1 0 1 | 2 |
| FBgn0001075 ft | FBgn0001186 <b>Hex-A</b>            | 0 1 1 0 | 2 |
| FBgn0001075 ft | FBgn0037643 <b>skap</b>             | 0 1 1 0 | 2 |
| FBgn0001075 ft | FBgn0013576 <b>I(3)82Fd</b>         | 0 1 0 1 | 2 |
| FBgn0001075 ft | FBgn0001315 <b>kl-5</b>             | 0 1 0 1 | 2 |
| FBgn0001075 ft | FBgn0035995 <b>CG3529</b>           | 0 1 0 1 | 2 |
| FBgn0001075 ft | FBgn0031057 <b>Ubqn</b>             | 0 0 1 1 | 2 |
| FBgn0001075 ft | FBgn0040227 <b>eIF-3p66</b>         | 0 0 0 2 | 2 |
| FBgn0001075 ft | FBgn0034242 <b>CG14480</b>          | 0 0 1 1 | 2 |
| FBgn0001075 ft | FBgn0040309 <b>Jafrac1</b>          | 0 1 0 1 | 2 |
| FBgn0001075 ft | FBgn0022764 <b>Sin3A</b>            | 0 1 0 1 | 2 |
| FBgn0001075 ft | FBgn0000319 <b>Chc</b>              | 0 1 0 1 | 2 |
| FBgn0001075 ft | FBgn0061200 <b>Nup153</b>           | 0 1 0 1 | 2 |
| FBgn0001075 ft | FBgn0015295 <b>shark</b>            | 0 1 1 0 | 2 |
| FBgn0001075 ft | FBgn0028327 <b>I(1)G0320</b>        | 0 1 0 1 | 2 |
| FBgn0001075 ft | FBgn0027335 <b>Rip11</b>            | 0 1 0 1 | 2 |
| FBgn0001075 ft | FBgn0020235 <b>ATPsyn-gamn</b>      | 0 1 0 1 | 2 |
| FBgn0001075 ft | FBgn0064225 <b>RpL5</b>             | 0 0 1 1 | 2 |
| FBgn0001075 ft | FBgn0261461 <b>RhoGAP18B</b>        | 0 1 1 0 | 2 |
| FBgn0001075 ft | FBgn0026084 <b>cib</b>              | 0 1 0 1 | 2 |
| FBgn0001075 ft | FBgn0020306 <b>dom</b>              | 0 1 0 1 | 2 |
| FBgn0001075 ft | FBgn0038704 <b>CG5316</b>           | 0 1 0 0 | 1 |
| FBgn0001075 ft | FBgn0037754 <b>CG8500</b>           | 0 0 0 1 | 1 |
| FBgn0001075 ft | FBgn0039904 <b>Hcf</b>              | 0 0 1 0 | 1 |
| FBgn0001075 ft | FBgn0004419 <b>me31B</b>            | 0 1 0 0 | 1 |
| FBgn0001075 ft | FBgn0022986 <b>qkr58E-1</b>         | 0 1 0 0 | 1 |
| FBgn0001075 ft | FBgn0021906 <b>RF<sub>e</sub>SP</b> | 0 1 0 0 | 1 |
| FBgn0001075 ft | FBgn0025683 <b>CG3164</b>           | 0 1 0 0 | 1 |
| FBgn0001075 ft | FBgn0015929 <b>dpa</b>              | 0 1 0 0 | 1 |
| FBgn0001075 ft | FBgn0038173 <b>Adgf-C</b>           | 0 0 0 1 | 1 |
| FBgn0001075 ft | FBgn0041164 <b>armi</b>             | 0 0 1 0 | 1 |
| FBgn0001075 ft | FBgn0028494 <b>CG6424</b>           | 0 1 0 0 | 1 |
| FBgn0001075 ft | FBgn0051776 <b>CG31776</b>          | 0 0 0 1 | 1 |
| FBgn0001075 ft | FBgn0261790 <b>SmE</b>              | 0 0 1 0 | 1 |
| FBgn0001075 ft | FBgn0029133 <b>REG</b>              | 0 0 1 0 | 1 |
| FBgn0001075 ft | FBgn0261922 <b>PI4KIIIalpha</b>     | 0 1 0 0 | 1 |
| FBgn0001075 ft | FBgn0002121 <b>I(2)gl</b>           | 0 0 1 0 | 1 |
| FBgn0001075 ft | FBgn0034970 <b>yki</b>              | 0 0 1 0 | 1 |
| FBgn0001075 ft | FBgn0053547 <b>Rim</b>              | 0 1 0 0 | 1 |
| FBgn0001075 ft | FBgn0037926 <b>Elp1</b>             | 0 0 1 0 | 1 |
| FBgn0001075 ft | FBgn0017397 <b>how</b>              | 0 1 0 0 | 1 |
| FBgn0001075 ft | FBgn0034451 <b>CG11242</b>          | 0 1 0 0 | 1 |
| FBgn0001075 ft | FBgn0020513 <b>ade5</b>             | 0 0 0 1 | 1 |
| FBgn0001075 ft | FBgn0037994 <b>CG4810</b>           | 0 0 0 1 | 1 |
| FBgn0001075 ft | FBgn0263600 <b>DNApol-delta</b>     | 0 1 0 0 | 1 |



## (A) entire PPIN

|                |                                 |         |   |
|----------------|---------------------------------|---------|---|
| FBgn0001075 ft | FBgn0016978 <b>snRNP-U1-70k</b> | 0 1 0 0 | 1 |
| FBgn0001075 ft | FBgn0036735 <b>Edc3</b>         | 0 0 0 1 | 1 |
| FBgn0001075 ft | FBgn0085422 <b>CG34393</b>      | 0 1 0 0 | 1 |
| FBgn0001075 ft | FBgn0011692 <b>pav</b>          | 0 1 0 0 | 1 |
| FBgn0001075 ft | FBgn0003731 <b>Egfr</b>         | 0 1 0 0 | 1 |
| FBgn0001075 ft | FBgn0034808 <b>CG9896</b>       | 0 0 0 1 | 1 |
| FBgn0001075 ft | FBgn0030685 <b>Graf</b>         | 0 0 0 1 | 1 |
| FBgn0001075 ft | FBgn0022724 <b>Taf8</b>         | 0 0 0 1 | 1 |
| FBgn0001075 ft | FBgn0250823 <b>gish</b>         | 0 1 0 0 | 1 |
| FBgn0001075 ft | FBgn0002921 <b>Atpalpha</b>     | 0 1 0 0 | 1 |
| FBgn0001075 ft | FBgn0263121 <b>Prosalpha1</b>   | 0 0 0 1 | 1 |
| FBgn0001075 ft | FBgn0041781 <b>SCAR</b>         | 0 0 0 1 | 1 |
| FBgn0001075 ft | FBgn0027079 <b>Aats-val</b>     | 0 1 0 0 | 1 |
| FBgn0001075 ft | FBgn0262160 <b>CG9932</b>       | 0 1 0 0 | 1 |
| FBgn0001075 ft | FBgn0031310 <b>CG4764</b>       | 0 0 0 1 | 1 |
| FBgn0001075 ft | FBgn0034259 <b>CG6459</b>       | 0 0 0 1 | 1 |
| FBgn0001075 ft | FBgn0013983 <b>imd</b>          | 0 0 0 1 | 1 |
| FBgn0001075 ft | FBgn0034913 <b>usnp</b>         | 0 1 0 0 | 1 |
| FBgn0001075 ft | FBgn0038674 <b>CG14285</b>      | 0 0 1 0 | 1 |
| FBgn0001075 ft | FBgn0005671 <b>Vha55</b>        | 0 1 0 0 | 1 |
| FBgn0001075 ft | FBgn0261854 <b>aPKC</b>         | 0 0 0 1 | 1 |
| FBgn0001075 ft | FBgn0030207 <b>CG2887</b>       | 0 1 0 0 | 1 |
| FBgn0001075 ft | FBgn0036875 <b>CG9449</b>       | 0 1 0 0 | 1 |
| FBgn0001075 ft | FBgn0026083 <b>tyf</b>          | 0 0 1 0 | 1 |
| FBgn0001075 ft | FBgn0011509 <b>SrpRbeta</b>     | 0 0 0 1 | 1 |
| FBgn0001075 ft | FBgn0015278 <b>Pi3K68D</b>      | 0 1 0 0 | 1 |
| FBgn0001075 ft | FBgn0033902 <b>Tango7</b>       | 0 0 1 0 | 1 |
| FBgn0001075 ft | FBgn0010379 <b>Akt1</b>         | 0 0 0 1 | 1 |
| FBgn0001075 ft | FBgn0023388 <b>Dap160</b>       | 0 0 0 1 | 1 |
| FBgn0001075 ft | FBgn0261456 <b>hpo</b>          | 0 1 0 0 | 1 |
| FBgn0001075 ft | FBgn0051465 <b>CG31465</b>      | 0 0 1 0 | 1 |
| FBgn0001075 ft | FBgn0037417 <b>Osi10</b>        | 0 1 0 0 | 1 |
| FBgn0001075 ft | FBgn0035478 <b>CG10853</b>      | 0 0 1 0 | 1 |
| FBgn0001075 ft | FBgn0033688 <b>Prp8</b>         | 0 1 0 0 | 1 |
| FBgn0001075 ft | FBgn0025637 <b>skpA</b>         | 0 1 0 0 | 1 |
| FBgn0001075 ft | FBgn0011661 <b>Moe</b>          | 0 0 0 1 | 1 |
| FBgn0001075 ft | FBgn0053635 <b>CG33635</b>      | 0 1 0 0 | 1 |
| FBgn0001075 ft | FBgn0032321 <b>YL-1</b>         | 0 1 0 0 | 1 |
| FBgn0001075 ft | FBgn0030997 <b>CG7990</b>       | 0 1 0 0 | 1 |
| FBgn0001075 ft | FBgn0024833 <b>AP-47</b>        | 0 0 1 0 | 1 |
| FBgn0001075 ft | FBgn0026562 <b>BM-40-SPARC</b>  | 0 0 0 1 | 1 |
| FBgn0001075 ft | FBgn0016080 <b>xmas-1</b>       | 0 0 0 1 | 1 |
| FBgn0001075 ft | FBgn0035204 <b>CG2277</b>       | 0 0 0 1 | 1 |
| FBgn0001075 ft | FBgn0010438 <b>mtSSB</b>        | 0 1 0 0 | 1 |
| FBgn0001075 ft | FBgn0015283 <b>Pros54</b>       | 0 1 0 0 | 1 |
| FBgn0001075 ft | FBgn0032488 <b>CG16812</b>      | 0 0 0 1 | 1 |
| FBgn0001075 ft | FBgn0052479 <b>CG32479</b>      | 0 0 0 1 | 1 |
| FBgn0001075 ft | FBgn0010280 <b>Taf4</b>         | 0 1 0 0 | 1 |
| FBgn0001075 ft | FBgn0003559 <b>su(f)</b>        | 0 1 0 0 | 1 |
| FBgn0001075 ft | FBgn0016794 <b>dos</b>          | 0 1 0 0 | 1 |
| FBgn0001075 ft | FBgn0035793 <b>CG7546</b>       | 0 1 0 0 | 1 |

## (A) entire PPIN

|                |                              |         |   |
|----------------|------------------------------|---------|---|
| FBgn0001075 ft | FBgn0001230 <b>Hsp68</b>     | 0 0 0 1 | 1 |
| FBgn0001075 ft | FBgn0039254 <b>Nmnat</b>     | 0 1 0 0 | 1 |
| FBgn0001075 ft | FBgn0260855 <b>Sec22</b>     | 0 0 0 1 | 1 |
| FBgn0001075 ft | FBgn0001297 <b>kay</b>       | 0 0 0 1 | 1 |
| FBgn0001075 ft | FBgn0010926 <b>I(3)07882</b> | 0 0 1 0 | 1 |
| FBgn0001075 ft | FBgn0010768 <b>sqz</b>       | 0 0 0 1 | 1 |
| FBgn0001075 ft | FBgn0064126 <b>CG33722</b>   | 0 0 0 1 | 1 |
| FBgn0001075 ft | FBgn0027587 <b>CG7028</b>    | 0 0 1 0 | 1 |
| FBgn0001075 ft | FBgn0032640 <b>Sgt</b>       | 0 0 1 0 | 1 |
| FBgn0001075 ft | FBgn0004654 <b>Pgd</b>       | 0 0 0 1 | 1 |
| FBgn0001075 ft | FBgn0038106 <b>CG7488</b>    | 0 1 0 0 | 1 |
| FBgn0001075 ft | FBgn0022349 <b>CG1910</b>    | 0 0 1 0 | 1 |
| FBgn0001075 ft | FBgn0026533 <b>Dek</b>       | 0 0 0 1 | 1 |
| FBgn0001075 ft | FBgn0003189 <b>r</b>         | 0 0 0 1 | 1 |
| FBgn0001075 ft | FBgn0030323 <b>CG2371</b>    | 0 0 0 1 | 1 |
| FBgn0001075 ft | FBgn0053777 <b>CG33777</b>   | 0 1 0 0 | 1 |
| FBgn0001075 ft | FBgn0030937 <b>CG15042</b>   | 0 0 1 0 | 1 |
| FBgn0001075 ft | FBgn0086134 <b>Pros25</b>    | 0 0 1 0 | 1 |
| FBgn0001075 ft | FBgn0033202 <b>Gr43b</b>     | 0 0 0 1 | 1 |
| FBgn0001075 ft | FBgn0051431 <b>CG31431</b>   | 0 1 0 0 | 1 |
| FBgn0001075 ft | FBgn0004381 <b>Klp68D</b>    | 0 0 0 1 | 1 |
| FBgn0001075 ft | FBgn0058042 <b>CG40042</b>   | 0 1 0 0 | 1 |
| FBgn0001075 ft | FBgn0004926 <b>eIF-2beta</b> | 0 0 0 1 | 1 |
| FBgn0001075 ft | FBgn0031859 <b>CG17377</b>   | 0 1 0 0 | 1 |
| FBgn0001075 ft | FBgn0260010 <b>rump</b>      | 0 0 0 1 | 1 |
| FBgn0001075 ft | FBgn0259108 <b>futsch</b>    | 0 0 1 0 | 1 |
| FBgn0001075 ft | FBgn0037087 <b>CG7519</b>    | 0 0 1 0 | 1 |
| FBgn0001075 ft | FBgn0033246 <b>ACC</b>       | 0 0 0 1 | 1 |
| FBgn0001075 ft | FBgn0027616 <b>YT521-B</b>   | 0 0 0 1 | 1 |
| FBgn0001075 ft | FBgn0000454 <b>Dip-B</b>     | 0 0 0 1 | 1 |
| FBgn0001075 ft | FBgn0040297 <b>Nhe2</b>      | 0 1 0 0 | 1 |
| FBgn0001075 ft | FBgn0038964 <b>Nop56</b>     | 0 0 1 0 | 1 |
| FBgn0001075 ft | FBgn0085384 <b>CG34355</b>   | 0 0 1 0 | 1 |
| FBgn0001075 ft | FBgn0028887 <b>CG3491</b>    | 0 0 0 1 | 1 |
| FBgn0001075 ft | FBgn0051784 <b>CG31784</b>   | 0 0 0 1 | 1 |
| FBgn0001075 ft | FBgn0000711 <b>flw</b>       | 0 1 0 0 | 1 |
| FBgn0001075 ft | FBgn0085417 <b>CG34388</b>   | 0 0 0 1 | 1 |
| FBgn0001075 ft | FBgn0017577 <b>Mcm5</b>      | 0 0 0 1 | 1 |
| FBgn0001075 ft | FBgn0033403 <b>CG13739</b>   | 0 0 0 1 | 1 |
| FBgn0001075 ft | FBgn0001994 <b>crp</b>       | 0 0 0 1 | 1 |
| FBgn0001075 ft | FBgn0034230 <b>CG4853</b>    | 0 1 0 0 | 1 |
| FBgn0001075 ft | FBgn0026079 <b>CG6133</b>    | 0 0 0 1 | 1 |
| FBgn0001075 ft | FBgn0039635 <b>CG11876</b>   | 0 0 1 0 | 1 |
| FBgn0001075 ft | FBgn0024556 <b>EfTuM</b>     | 0 0 0 1 | 1 |
| FBgn0001075 ft | FBgn0036566 <b>CIC-c</b>     | 0 0 0 1 | 1 |
| FBgn0001075 ft | FBgn0024947 <b>NTPase</b>    | 0 0 0 1 | 1 |
| FBgn0001075 ft | FBgn0032393 <b>CG12264</b>   | 0 0 0 1 | 1 |
| FBgn0001075 ft | FBgn0013770 <b>Cp1</b>       | 0 0 1 0 | 1 |
| FBgn0001075 ft | FBgn0035165 <b>CG13887</b>   | 0 1 0 0 | 1 |
| FBgn0001075 ft | FBgn0085447 <b>sif</b>       | 0 0 1 0 | 1 |
| FBgn0001075 ft | FBgn0015001 <b>iotaTry</b>   | 0 0 0 1 | 1 |

## (A) entire PPIN

|                |                                 |            |    |
|----------------|---------------------------------|------------|----|
| FBgn0001075 ft | FBgn0035348 <b>CG16758</b>      | 0 0 0 1    | 1  |
| FBgn0001075 ft | FBgn0027338 <b>Kap-alpha3</b>   | 0 0 0 1    | 1  |
| FBgn0001075 ft | FBgn0038046 <b>CG5641</b>       | 0 0 0 1    | 1  |
| FBgn0001075 ft | FBgn0027378 <b>MRG15</b>        | 0 1 0 0    | 1  |
| FBgn0001075 ft | FBgn0027518 <b>CG7609</b>       | 0 0 1 0    | 1  |
| FBgn0001075 ft | FBgn0011703 <b>RnrL</b>         | 0 1 0 0    | 1  |
| FBgn0001075 ft | FBgn0039566 <b>CG4849</b>       | 0 1 0 0    | 1  |
| FBgn0001075 ft | FBgn0086710 <b>RpL30</b>        | 0 1 0 0    | 1  |
| FBgn0001075 ft | FBgn0015806 <b>S6k</b>          | 0 1 0 0    | 1  |
| FBgn0001075 ft | FBgn0261551 <b>CG42669</b>      | 0 0 0 1    | 1  |
| FBgn0001075 ft | FBgn0002781 <b>mod(mdg4)</b>    | 0 0 0 1    | 1  |
| FBgn0001075 ft | FBgn0003301 <b>rut</b>          | 0 0 0 1    | 1  |
| FBgn0001075 ft | FBgn0035329 <b>DmsR-2</b>       | 0 1 0 0    | 1  |
| FBgn0001075 ft | FBgn0086356 <b>tum</b>          | 0 1 0 0    | 1  |
| FBgn0001075 ft | FBgn0037853 <b>CG14696</b>      | 0 1 0 0    | 1  |
| FBgn0001075 ft | FBgn0003274 <b>RpLP2</b>        | 0 0 1 0    | 1  |
| FBgn0001075 ft | FBgn0027571 <b>CG3523</b>       | 0 0 1 0    | 1  |
| FBgn0001075 ft | FBgn0036277 <b>CG10418</b>      | 0 0 0 1    | 1  |
| FBgn0001075 ft | FBgn0037376 <b>CG2051</b>       | 0 0 0 1    | 1  |
| FBgn0001075 ft | FBgn0031187 <b>CG14619</b>      | 0 0 1 0    | 1  |
| FBgn0001075 ft | FBgn0040505 <b>Alk</b>          | 0 0 0 1    | 1  |
| FBgn0001075 ft | FBgn0259978 <b>vlc</b>          | 0 0 0 1    | 1  |
| FBgn0001075 ft | FBgn0033081 <b>geminin</b>      | 0 0 0 1    | 1  |
| FBgn0001075 ft | FBgn0030558 <b>CG1461</b>       | 0 0 1 0    | 1  |
| FBgn0001075 ft | FBgn0260934 <b>par-1</b>        | 0 0 1 0    | 1  |
| FBgn0001075 ft | FBgn0000017 <b>Abl</b>          | 0 0 0 1    | 1  |
| FBgn0001075 ft | FBgn0086901 <b>cv-c</b>         | 0 0 1 0    | 1  |
| FBgn0001075 ft | FBgn0011715 <b>Snr1</b>         | 0 1 0 0    | 1  |
| FBgn0001075 ft | FBgn0034674 <b>CG9304</b>       | 0 0 0 1    | 1  |
| FBgn0001075 ft | FBgn0017579 <b>RpL14</b>        | 0 1 0 0    | 1  |
| FBgn0001075 ft | FBgn0000244 <b>by</b>           | 0 0 0 1    | 1  |
| FBgn0001075 ft | FBgn0042125 <b>CG18787</b>      | 0 0 1 0    | 1  |
| FBgn0001075 ft | FBgn0029629 <b>CG8636</b>       | 0 0 0 1    | 1  |
| FBgn0001075 ft | FBgn0030612 <b>CG5599</b>       | 0 1 0 0    | 1  |
| FBgn0001075 ft | FBgn0035110 <b>thoc7</b>        | 0 1 0 0    | 1  |
| FBgn0001075 ft | FBgn0262029 <b>d</b>            | 0 0 0 1    | 1  |
| FBgn0001075 ft | FBgn0030956 <b>CG18259</b>      | 0 0 1 0    | 1  |
| FBgn0001075 ft | FBgn0003517 <b>sta</b>          | 0 0 1 0    | 1  |
| FBgn0001075 ft | FBgn0085432 <b>pan</b>          | 0 0 1 0    | 1  |
| FBgn0001075 ft | FBgn0028427 <b>Ilk</b>          | 0 1 0 0    | 1  |
| FBgn0001075 ft | FBgn0051450 <b>mRpS18A</b>      | 0 0 1 0    | 1  |
| FBgn0001075 ft | FBgn0036763 <b>CG7441</b>       | 0 0 0 1    | 1  |
| FBgn0001075 ft | FBgn0034308 <b>CG10915</b>      | 0 1 0 0    | 1  |
| FBgn0001075 ft | FBgn0033033 <b>scaf</b>         | 0 0 0 1    | 1  |
| FBgn0001075 ft | FBgn0035271 <b>CG2021</b>       | 0 0 0 1    | 1  |
| FBgn0001075 ft | FBgn0259229 <b>CG42329</b>      | 0 0 1 0    | 1  |
| FBgn0001075 ft | FBgn0029092 <b>ced-6</b>        | 0 0 0 1    | 1  |
| FBgn0001075 ft | FBgn0002607 <b>RpL19</b>        | 0 1 0 0    | 1  |
| FBgn0001075 ft | FBgn0003134 <b>Pp1alpha-96A</b> | 0 1 0 0    | 1  |
| FBgn0001075 ft | FBgn0040009 <b>CG17490</b>      | 0 0 0 1    | 1  |
| FBgn0000658 fj | FBgn0010246 <b>Myo61F</b>       | 1 41 29 15 | 85 |

## (A) entire PPIN

|                |                              |                      |    |
|----------------|------------------------------|----------------------|----|
| FBgn0000658 fj | FBgn0261794 <b>kcc</b>       | 1 20 22 17           | 59 |
| FBgn0000658 fj | FBgn0263006 <b>Ca-P60A</b>   | 1 11 13 10           | 34 |
| FBgn0000658 fj | FBgn0033062 <b>Ars2</b>      | 1 12 12 9            | 33 |
| FBgn0000658 fj | FBgn0028479 <b>CG4389</b>    | 1 13 8 10            | 31 |
| FBgn0000658 fj | FBgn0027084 <b>Aats-lys</b>  | 1 8 8 6              | 22 |
| FBgn0000658 fj | FBgn0010774 <b>Aly</b>       | <b>0.98</b> 4 4 4    | 12 |
| FBgn0000658 fj | FBgn0037312 <b>CG11999</b>   | <b>0.96</b> 4 5 3    | 12 |
| FBgn0000658 fj | FBgn0004378 <b>Klp61F</b>    | <b>0.95</b> 4 3 5    | 12 |
| FBgn0000658 fj | FBgn0000253 <b>Cam</b>       | <b>0.89</b> 8 9 5    | 22 |
| FBgn0000658 fj | FBgn0086768 <b>Pcmt</b>      | <b>0.72</b> 2 5 2    | 9  |
| FBgn0000658 fj | FBgn0036763 <b>CG7441</b>    | <b>0.68</b> 3 4 1    | 8  |
| FBgn0000658 fj | FBgn0034259 <b>CG6459</b>    | <b>0.66</b> 3 3 1    | 7  |
| FBgn0000658 fj | FBgn0027616 <b>YT521-B</b>   | <b>0.66</b> 3 3 1    | 7  |
| FBgn0000658 fj | FBgn0010551 <b>I(2)03709</b> | <b>0.61</b> 4 3 0    | 7  |
| FBgn0000658 fj | FBgn0004401 <b>Pep</b>       | <b>0.6</b> 5 4 2     | 11 |
| FBgn0000658 fj | FBgn0030678 <b>CG11679</b>   | <b>0.58</b> 5 3 0    | 8  |
| FBgn0000658 fj | FBgn0036919 <b>Grasp65</b>   | <b>0.58</b> 2 3 2    | 7  |
| FBgn0000658 fj | FBgn0035500 <b>ens</b>       | <b>0.58</b> 2 2 2    | 6  |
| FBgn0000658 fj | FBgn0002031 <b>I(2)37Cc</b>  | <b>0.57</b> 2 1 3    | 6  |
| FBgn0000658 fj | FBgn0010342 <b>Map60</b>     | <b>0.56</b> 3 2 1    | 6  |
| FBgn0000658 fj | FBgn0031256 <b>CG4164</b>    | <b>0.55</b> 13 13 13 | 39 |
| FBgn0000658 fj | FBgn0261119 <b>Prp19</b>     | <b>0.55</b> 2 3 1    | 6  |
| FBgn0000658 fj | FBgn0262601 <b>SmB</b>       | <b>0.54</b> 1 2 2    | 5  |
| FBgn0000658 fj | FBgn0025352 <b>Thiolase</b>  | <b>0.53</b> 3 2 3    | 8  |
| FBgn0000658 fj | FBgn0263594 <b>lost</b>      | <b>0.53</b> 2 2 3    | 7  |
| FBgn0000658 fj | FBgn0043884 <b>mask</b>      | <b>0.52</b> 2 4 2    | 8  |
| FBgn0000658 fj | FBgn0010173 <b>RpA-70</b>    | <b>0.51</b> 7 7 3    | 17 |
| FBgn0000658 fj | FBgn0014868 <b>Ost48</b>     | <b>0.51</b> 2 1 2    | 5  |
| FBgn0000658 fj | FBgn0025457 <b>Bub3</b>      | <b>0.5</b> 2 2 1     | 5  |
| FBgn0000658 fj | FBgn0011571 <b>caz</b>       | <b>0.49</b> 2 1 2    | 5  |
| FBgn0000658 fj | FBgn0011225 <b>jar</b>       | <b>0.48</b> 12 10 3  | 25 |
| FBgn0000658 fj | FBgn0011016 <b>SsRbeta</b>   | <b>0.46</b> 2 1 4    | 7  |
| FBgn0000658 fj | FBgn0037643 <b>skap</b>      | <b>0.43</b> 2 2 5    | 9  |
| FBgn0000658 fj | FBgn0035060 <b>Eps-15</b>    | <b>0.42</b> 1 4 1    | 6  |
| FBgn0000658 fj | FBgn0016691 <b>Oscp</b>      | <b>0.42</b> 1 1 2    | 4  |
| FBgn0000658 fj | FBgn0032906 <b>RPA2</b>      | <b>0.41</b> 1 2 1    | 4  |
| FBgn0000658 fj | FBgn0038224 <b>CG3321</b>    | <b>0.4</b> 1 2 1     | 4  |
| FBgn0000658 fj | FBgn0032015 <b>CG7830</b>    | <b>0.39</b> 1 2 1    | 4  |
| FBgn0000658 fj | FBgn0003261 <b>Rm62</b>      | <b>0.38</b> 9 16 9   | 34 |
| FBgn0000658 fj | FBgn0023167 <b>SmD3</b>      | <b>0.37</b> 1 2 1    | 4  |
| FBgn0000658 fj | FBgn0003345 <b>sd</b>        | <b>0.36</b> 4 0 1    | 5  |
| FBgn0000658 fj | FBgn0011739 <b>wts</b>       | <b>0.34</b> 15 3 4   | 22 |
| FBgn0000658 fj | FBgn0030612 <b>CG5599</b>    | <b>0.33</b> 3 3 1    | 7  |
| FBgn0000658 fj | FBgn0039302 <b>Nup358</b>    | <b>0.33</b> 3 2 0    | 5  |
| FBgn0000658 fj | FBgn0032644 <b>CG5131</b>    | <b>0.32</b> 2 2 0    | 4  |
| FBgn0000658 fj | FBgn0002638 <b>Bj1</b>       | <b>0.31</b> 0 12 4   | 16 |
| FBgn0000658 fj | FBgn0033471 <b>CG12134</b>   | <b>0.31</b> 5 0 0    | 5  |
| FBgn0000658 fj | FBgn0022349 <b>CG1910</b>    | <b>0.31</b> 0 4 0    | 4  |
| FBgn0000658 fj | FBgn0010412 <b>RpS19a</b>    | <b>0.3</b> 0 1 2     | 3  |
| FBgn0000658 fj | FBgn0036740 <b>CG6259</b>    | <b>0.3</b> 0 2 1     | 3  |
| FBgn0000658 fj | FBgn0040284 <b>SF2</b>       | <b>0.29</b> 1 2 1    | 4  |

## (A) entire PPIN

|                |                                |                   |    |
|----------------|--------------------------------|-------------------|----|
| FBgn0000658 fj | FBgn0024238 <b>Fim</b>         | <b>0.29</b> 0 3 0 | 3  |
| FBgn0000658 fj | FBgn0033663 <b>ERp60</b>       | <b>0.29</b> 0 0 3 | 3  |
| FBgn0000658 fj | FBgn0004227 <b>nonA</b>        | <b>0.28</b> 5 5 3 | 13 |
| FBgn0000658 fj | FBgn0024183 <b>vig</b>         | <b>0.28</b> 1 3 2 | 6  |
| FBgn0000658 fj | FBgn0053129 <b>CG33129</b>     | <b>0.28</b> 0 0 3 | 3  |
| FBgn0000658 fj | FBgn0052685 <b>CG32685</b>     | <b>0.28</b> 2 0 1 | 3  |
| FBgn0000658 fj | FBgn0260010 <b>rump</b>        | <b>0.28</b> 1 0 2 | 3  |
| FBgn0000658 fj | FBgn0030692 <b>mRpS30</b>      | <b>0.27</b> 0 2 2 | 4  |
| FBgn0000658 fj | FBgn0005640 <b>Eip63E</b>      | <b>0.27</b> 1 1 2 | 4  |
| FBgn0000658 fj | FBgn0039303 <b>CG11857</b>     | <b>0.27</b> 0 2 1 | 3  |
| FBgn0000658 fj | FBgn0031497 <b>CG17259</b>     | <b>0.26</b> 1 0 2 | 3  |
| FBgn0000658 fj | FBgn0005411 <b>U2af50</b>      | <b>0.26</b> 0 0 3 | 3  |
| FBgn0000658 fj | FBgn0046214 <b>vig2</b>        | <b>0.25</b> 3 4 5 | 12 |
| FBgn0000658 fj | FBgn0023388 <b>Dap160</b>      | <b>0.25</b> 1 3 0 | 4  |
| FBgn0000658 fj | FBgn0040078 <b>pont</b>        | <b>0.25</b> 0 2 1 | 3  |
| FBgn0000658 fj | FBgn0013269 <b>FK506-bp1</b>   | <b>0.24</b> 2 3 4 | 9  |
| FBgn0000658 fj | FBgn0037728 <b>CG16817</b>     | <b>0.23</b> 1 2 0 | 3  |
| FBgn0000658 fj | FBgn0005648 <b>Pabp2</b>       | <b>0.23</b> 0 0 2 | 2  |
| FBgn0000658 fj | FBgn0029133 <b>REG</b>         | <b>0.22</b> 0 0 2 | 2  |
| FBgn0000658 fj | FBgn0001091 <b>Gapdh1</b>      | <b>0.22</b> 0 0 2 | 2  |
| FBgn0000658 fj | FBgn0032198 <b>eEF1delta</b>   | <b>0.2</b> 1 1 2  | 4  |
| FBgn0000658 fj | FBgn0263347 <b>Caf1</b>        | <b>0.19</b> 1 3 0 | 4  |
| FBgn0000658 fj | FBgn0259978 <b>vlc</b>         | <b>0.18</b> 0 2 0 | 2  |
| FBgn0000658 fj | FBgn0039562 <b>Gp93</b>        | <b>0.17</b> 1 0 3 | 4  |
| FBgn0000658 fj | FBgn0027548 <b>nito</b>        | <b>0.15</b> 0 0 2 | 2  |
| FBgn0000658 fj | FBgn0028327 <b>I(1)G0320</b>   | <b>0.14</b> 4 4 6 | 14 |
| FBgn0000658 fj | FBgn0024308 <b>Smr</b>         | <b>0.14</b> 2 3 2 | 7  |
| FBgn0000658 fj | FBgn0261790 <b>SmE</b>         | <b>0.14</b> 1 2 1 | 4  |
| FBgn0000658 fj | FBgn0011640 <b>lark</b>        | <b>0.14</b> 1 3 0 | 4  |
| FBgn0000658 fj | FBgn0037607 <b>CG8036</b>      | <b>0.14</b> 0 1 2 | 3  |
| FBgn0000658 fj | FBgn0087035 <b>AGO2</b>        | <b>0.13</b> 4 4 6 | 14 |
| FBgn0000658 fj | FBgn0010408 <b>RpS9</b>        | <b>0.13</b> 5 2 1 | 8  |
| FBgn0000658 fj | FBgn0028734 <b>Fmr1</b>        | <b>0.12</b> 7 5 5 | 17 |
| FBgn0000658 fj | FBgn0038965 <b>mats</b>        | <b>0.12</b> 0 0 2 | 2  |
| FBgn0000658 fj | FBgn0032731 <b>CG10641</b>     | <b>0.11</b> 6 6 3 | 15 |
| FBgn0000658 fj | FBgn0033482 <b>CG1371</b>      | <b>0.11</b> 2 1 0 | 3  |
| FBgn0000658 fj | FBgn0026409 <b>Mpcp</b>        | <b>0.11</b> 0 1 2 | 3  |
| FBgn0000658 fj | FBgn0262716 <b>Arp66B</b>      | <b>0.1</b> 6 6 3  | 15 |
| FBgn0000658 fj | FBgn0015268 <b>Nap1</b>        | <b>0.1</b> 3 2 2  | 7  |
| FBgn0000658 fj | FBgn0033039 <b>gp210</b>       | <b>0.1</b> 2 2 0  | 4  |
| FBgn0000658 fj | FBgn0250814 <b>CG4169</b>      | <b>0.09</b> 7 6 3 | 16 |
| FBgn0000658 fj | FBgn0263106 <b>DnaJ-1</b>      | <b>0.09</b> 3 2 1 | 6  |
| FBgn0000658 fj | FBgn0034237 <b>eIF3-S9</b>     | <b>0.08</b> 1 1 2 | 4  |
| FBgn0000658 fj | FBgn0038535 <b>alt</b>         | <b>0.08</b> 0 0 2 | 2  |
| FBgn0000658 fj | FBgn0002593 <b>RpLP1</b>       | <b>0.06</b> 1 2 2 | 5  |
| FBgn0000658 fj | FBgn0010348 <b>Arf79F</b>      | <b>0.06</b> 1 2 1 | 4  |
| FBgn0000658 fj | FBgn0032444 <b>CG5525</b>      | <b>0.05</b> 2 2 4 | 8  |
| FBgn0000658 fj | FBgn0086710 <b>RpL30</b>       | <b>0.05</b> 2 2 2 | 6  |
| FBgn0000658 fj | FBgn0001197 <b>His2Av</b>      | <b>0.05</b> 2 1 1 | 4  |
| FBgn0000658 fj | FBgn0013981 <b>His4r</b>       | <b>0.04</b> 3 2 2 | 7  |
| FBgn0000658 fj | FBgn0037719 <b>bocksbeutel</b> | <b>0.04</b> 0 4 1 | 5  |

## (A) entire PPIN

|                |                                |                      |     |
|----------------|--------------------------------|----------------------|-----|
| FBgn0000658 fj | FBgn0028969 <b>deltaCOP</b>    | <b>0.03</b> 3 5 3    | 11  |
| FBgn0000658 fj | FBgn0000181 <b>bic</b>         | <b>0.02</b> 1 4 8    | 13  |
| FBgn0000658 fj | FBgn0017545 <b>RpS3A</b>       | <b>0.02</b> 3 2 2    | 7   |
| FBgn0000658 fj | FBgn0001215 <b>Hrb98DE</b>     | <b>0.02</b> 4 2 1    | 7   |
| FBgn0000658 fj | FBgn0003514 <b>sqh</b>         | <b>0.01</b> 17 14 8  | 39  |
| FBgn0000658 fj | FBgn0038145 <b>Droj2</b>       | <b>0.01</b> 9 12 10  | 31  |
| FBgn0000658 fj | FBgn0002780 <b>mod</b>         | <b>0.01</b> 6 4 7    | 17  |
| FBgn0000658 fj | FBgn0000258 <b>Ckl1alpha</b>   | <b>0.01</b> 7 5 5    | 17  |
| FBgn0000658 fj | FBgn0031781 <b>Arc-p20</b>     | <b>0.01</b> 2 4 3    | 9   |
| FBgn0000658 fj | FBgn0019936 <b>RpS20</b>       | <b>0.01</b> 3 4 2    | 9   |
| FBgn0000658 fj | FBgn0024987 <b>ssx</b>         | <b>0.01</b> 2 2 3    | 7   |
| FBgn0000658 fj | FBgn0038805 <b>TFAM</b>        | <b>0.01</b> 2 2 1    | 5   |
| FBgn0000658 fj | FBgn0005674 <b>Aats-glupro</b> | <b>0.01</b> 1 1 2    | 4   |
| FBgn0000658 fj | FBgn0005634 <b>zip</b>         | <b>0</b> 248 213 150 | 611 |
| FBgn0000658 fj | FBgn0000556 <b>Ef1alpha48D</b> | <b>0</b> 42 59 45    | 146 |
| FBgn0000658 fj | FBgn0000042 <b>Act5C</b>       | <b>0</b> 37 36 40    | 113 |
| FBgn0000658 fj | FBgn0003887 <b>betaTub56D</b>  | <b>0</b> 31 33 31    | 95  |
| FBgn0000658 fj | FBgn0001218 <b>Hsc70-3</b>     | <b>0</b> 33 27 24    | 84  |
| FBgn0000658 fj | FBgn0002525 <b>Lam</b>         | <b>0</b> 24 31 23    | 78  |
| FBgn0000658 fj | FBgn0000709 <b>flil</b>        | <b>0</b> 31 26 20    | 77  |
| FBgn0000658 fj | FBgn0003721 <b>Tm1</b>         | <b>0</b> 27 26 16    | 69  |
| FBgn0000658 fj | FBgn0003884 <b>alphaTub84B</b> | <b>0</b> 21 22 20    | 63  |
| FBgn0000658 fj | FBgn0001219 <b>Hsc70-4</b>     | <b>0</b> 23 22 18    | 63  |
| FBgn0000658 fj | FBgn0003178 <b>PyK</b>         | <b>0</b> 21 20 16    | 57  |
| FBgn0000658 fj | FBgn0030699 <b>CG8578</b>      | <b>0</b> 18 17 12    | 47  |
| FBgn0000658 fj | FBgn0263231 <b>bel</b>         | <b>0</b> 14 14 16    | 44  |
| FBgn0000658 fj | FBgn0001220 <b>Hsc70-5</b>     | <b>0</b> 13 18 11    | 42  |
| FBgn0000658 fj | FBgn0250789 <b>alpha-Spec</b>  | <b>0</b> 17 16 8     | 41  |
| FBgn0000658 fj | FBgn0034577 <b>cpa</b>         | <b>0</b> 14 14 8     | 36  |
| FBgn0000658 fj | FBgn0039757 <b>RpS7</b>        | <b>0</b> 12 11 9     | 32  |
| FBgn0000658 fj | FBgn0004687 <b>Mlc-c</b>       | <b>0</b> 12 9 8      | 29  |
| FBgn0000658 fj | FBgn0040227 <b>eIF-3p66</b>    | <b>0</b> 9 9 9       | 27  |
| FBgn0000658 fj | FBgn0029176 <b>Ef1gamma</b>    | <b>0</b> 7 11 7      | 25  |
| FBgn0000658 fj | FBgn0037891 <b>CG5214</b>      | <b>0</b> 10 10 5     | 25  |
| FBgn0000658 fj | FBgn0082582 <b>tmod</b>        | <b>0</b> 12 8 4      | 24  |
| FBgn0000658 fj | FBgn0011570 <b>cpb</b>         | <b>0</b> 10 8 5      | 23  |
| FBgn0000658 fj | FBgn0003360 <b>sesB</b>        | <b>0</b> 7 8 6       | 21  |
| FBgn0000658 fj | FBgn0261710 <b>nocte</b>       | <b>0</b> 7 8 6       | 21  |
| FBgn0000658 fj | FBgn0261619 <b>pAbp</b>        | <b>0</b> 9 6 5       | 20  |
| FBgn0000658 fj | FBgn0010217 <b>ATPsyn-beta</b> | <b>0</b> 7 5 6       | 18  |
| FBgn0000658 fj | FBgn0003676 <b>T-cp1</b>       | <b>0</b> 6 6 6       | 18  |
| FBgn0000658 fj | FBgn0262734 <b>Rbp2</b>        | <b>0</b> 4 8 6       | 18  |
| FBgn0000658 fj | FBgn0011211 <b>blw</b>         | <b>0</b> 6 6 6       | 18  |
| FBgn0000658 fj | FBgn0036213 <b>RpL10Ab</b>     | <b>0</b> 6 5 6       | 17  |
| FBgn0000658 fj | FBgn0035608 <b>blanks</b>      | <b>0</b> 5 4 7       | 16  |
| FBgn0000658 fj | FBgn0003888 <b>betaTub60D</b>  | <b>0</b> 6 6 4       | 16  |
| FBgn0000658 fj | FBgn0015834 <b>Trip1</b>       | <b>0</b> 6 5 5       | 16  |
| FBgn0000658 fj | FBgn0263391 <b>hts</b>         | <b>0</b> 6 5 5       | 16  |
| FBgn0000658 fj | FBgn0000044 <b>Act57B</b>      | <b>0</b> 5 5 5       | 15  |
| FBgn0000658 fj | FBgn0004237 <b>Hrb87F</b>      | <b>0</b> 4 6 5       | 15  |
| FBgn0000658 fj | FBgn0003022 <b>Ote</b>         | <b>0</b> 2 8 5       | 15  |

## (A) entire PPIN

|                |                                |         |    |
|----------------|--------------------------------|---------|----|
| FBgn0000658 fj | FBgn0000100 <b>RpLP0</b>       | 0 5 5 4 | 14 |
| FBgn0000658 fj | FBgn0039697 <b>CG7834</b>      | 0 3 6 4 | 13 |
| FBgn0000658 fj | FBgn0004888 <b>Scsalpha</b>    | 0 4 5 4 | 13 |
| FBgn0000658 fj | FBgn0263396 <b>sqd</b>         | 0 5 4 3 | 12 |
| FBgn0000658 fj | FBgn0053303 <b>CG33303</b>     | 0 5 3 4 | 12 |
| FBgn0000658 fj | FBgn0015778 <b>rin</b>         | 0 2 4 6 | 12 |
| FBgn0000658 fj | FBgn0027066 <b>Eb1</b>         | 0 4 6 2 | 12 |
| FBgn0000658 fj | FBgn0031977 <b>baf</b>         | 0 5 4 3 | 12 |
| FBgn0000658 fj | FBgn0032859 <b>Arc-p34</b>     | 0 5 5 1 | 11 |
| FBgn0000658 fj | FBgn0011284 <b>RpS4</b>        | 0 5 4 2 | 11 |
| FBgn0000658 fj | FBgn0035499 <b>Chd64</b>       | 0 4 3 4 | 11 |
| FBgn0000658 fj | FBgn0002645 <b>Map205</b>      | 0 4 5 2 | 11 |
| FBgn0000658 fj | FBgn0001216 <b>Hsc70-1</b>     | 0 3 4 4 | 11 |
| FBgn0000658 fj | FBgn0013325 <b>RpL11</b>       | 0 4 4 3 | 11 |
| FBgn0000658 fj | FBgn0001233 <b>Hsp83</b>       | 0 3 1 6 | 10 |
| FBgn0000658 fj | FBgn0029093 <b>cathD</b>       | 0 3 3 4 | 10 |
| FBgn0000658 fj | FBgn0030993 <b>Mec2</b>        | 0 4 3 3 | 10 |
| FBgn0000658 fj | FBgn0001942 <b>eIF-4a</b>      | 0 4 3 3 | 10 |
| FBgn0000658 fj | FBgn0261593 <b>RpS10b</b>      | 0 3 3 3 | 9  |
| FBgn0000658 fj | FBgn0014189 <b>Hel25E</b>      | 0 5 2 2 | 9  |
| FBgn0000658 fj | FBgn0003890 <b>betaTub97EF</b> | 0 3 3 3 | 9  |
| FBgn0000658 fj | FBgn0010198 <b>RpS15Aa</b>     | 0 4 3 2 | 9  |
| FBgn0000658 fj | FBgn0027932 <b>Akap200</b>     | 0 3 5 1 | 9  |
| FBgn0000658 fj | FBgn0004403 <b>RpS14a</b>      | 0 2 4 3 | 9  |
| FBgn0000658 fj | FBgn0004363 <b>porin</b>       | 0 3 2 4 | 9  |
| FBgn0000658 fj | FBgn0003732 <b>Top2</b>        | 0 7 0 1 | 8  |
| FBgn0000658 fj | FBgn0015756 <b>RpL9</b>        | 0 3 3 2 | 8  |
| FBgn0000658 fj | FBgn0051363 <b>Jupiter</b>     | 0 1 3 3 | 7  |
| FBgn0000658 fj | FBgn0001961 <b>Sop2</b>        | 0 2 4 1 | 7  |
| FBgn0000658 fj | FBgn0086904 <b>Nacalpha</b>    | 0 2 2 3 | 7  |
| FBgn0000658 fj | FBgn0034743 <b>RpS16</b>       | 0 2 4 1 | 7  |
| FBgn0000658 fj | FBgn0010078 <b>RpL23</b>       | 0 3 3 1 | 7  |
| FBgn0000658 fj | FBgn0031437 <b>p16-ARC</b>     | 0 3 3 1 | 7  |
| FBgn0000658 fj | FBgn0011710 <b>Sep1</b>        | 0 2 4 1 | 7  |
| FBgn0000658 fj | FBgn0014269 <b>prod</b>        | 0 4 1 2 | 7  |
| FBgn0000658 fj | FBgn0039300 <b>RpS27</b>       | 0 2 3 1 | 6  |
| FBgn0000658 fj | FBgn0034970 <b>yki</b>         | 0 4 1 1 | 6  |
| FBgn0000658 fj | FBgn0028737 <b>Ef1beta</b>     | 0 2 2 2 | 6  |
| FBgn0000658 fj | FBgn0261397 <b>didum</b>       | 0 5 0 1 | 6  |
| FBgn0000658 fj | FBgn0000559 <b>Ef2b</b>        | 0 1 0 4 | 5  |
| FBgn0000658 fj | FBgn0029118 <b>Sucb</b>        | 0 2 3 0 | 5  |
| FBgn0000658 fj | FBgn0261609 <b>eIF-2alpha</b>  | 0 2 2 1 | 5  |
| FBgn0000658 fj | FBgn0002622 <b>RpS3</b>        | 0 1 3 1 | 5  |
| FBgn0000658 fj | FBgn0025286 <b>RpL31</b>       | 0 2 1 1 | 4  |
| FBgn0000658 fj | FBgn0001217 <b>Hsc70-2</b>     | 0 1 2 1 | 4  |
| FBgn0000658 fj | FBgn0004167 <b>kst</b>         | 0 0 1 3 | 4  |
| FBgn0000658 fj | FBgn0035872 <b>CG7185</b>      | 0 1 2 1 | 4  |
| FBgn0000658 fj | FBgn0000173 <b>ben</b>         | 0 2 1 1 | 4  |
| FBgn0000658 fj | FBgn0027329 <b>Tcp-1zeta</b>   | 0 1 1 2 | 4  |
| FBgn0000658 fj | FBgn0000319 <b>Chc</b>         | 0 3 0 1 | 4  |
| FBgn0000658 fj | FBgn0004838 <b>Hrb27C</b>      | 0 0 2 2 | 4  |

## (A) entire PPIN

|                |                                  |         |   |
|----------------|----------------------------------|---------|---|
| FBgn0000658 fj | FBgn0004556 <b>Dbp73D</b>        | 0 1 1 1 | 3 |
| FBgn0000658 fj | FBgn0031021 <b>CG12203</b>       | 0 1 1 1 | 3 |
| FBgn0000658 fj | FBgn0028470 <b>Patr-1</b>        | 0 1 1 1 | 3 |
| FBgn0000658 fj | FBgn0011787 <b>mRpL12</b>        | 0 1 1 1 | 3 |
| FBgn0000658 fj | FBgn0011742 <b>Arp14D</b>        | 0 1 2 0 | 3 |
| FBgn0000658 fj | FBgn0026761 <b>Trap1</b>         | 0 1 1 1 | 3 |
| FBgn0000658 fj | FBgn0020910 <b>RpL3</b>          | 0 1 1 1 | 3 |
| FBgn0000658 fj | FBgn0014391 <b>sun</b>           | 0 1 1 1 | 3 |
| FBgn0000658 fj | FBgn0031066 <b>CG14235</b>       | 0 1 1 1 | 3 |
| FBgn0000658 fj | FBgn0030136 <b>RpS28b</b>        | 0 1 1 1 | 3 |
| FBgn0000658 fj | FBgn0261380 <b>mRpL37</b>        | 0 1 1 1 | 3 |
| FBgn0000658 fj | FBgn0022959 <b>yps</b>           | 0 1 1 1 | 3 |
| FBgn0000658 fj | FBgn0053868 <b>His2B:CG3386</b>  | 0 1 1 1 | 3 |
| FBgn0000658 fj | FBgn0086656 <b>shrb</b>          | 0 1 1 1 | 3 |
| FBgn0000658 fj | FBgn0035811 <b>CG12262</b>       | 0 1 1 1 | 3 |
| FBgn0000658 fj | FBgn0003449 <b>snf</b>           | 0 1 1 1 | 3 |
| FBgn0000658 fj | FBgn0024556 <b>EfTuM</b>         | 0 1 1 1 | 3 |
| FBgn0000658 fj | FBgn0033740 <b>dgt5</b>          | 0 1 1 1 | 3 |
| FBgn0000658 fj | FBgn0025700 <b>CG5885</b>        | 0 1 1 1 | 3 |
| FBgn0000658 fj | FBgn0003274 <b>RpLP2</b>         | 0 1 1 1 | 3 |
| FBgn0000658 fj | FBgn0053193 <b>sav</b>           | 0 1 1 1 | 3 |
| FBgn0000658 fj | FBgn0003941 <b>RpL40</b>         | 0 1 1 1 | 3 |
| FBgn0000658 fj | FBgn0032961 <b>CG1416</b>        | 0 1 1 1 | 3 |
| FBgn0000658 fj | FBgn0034398 <b>CG15098</b>       | 0 1 1 1 | 3 |
| FBgn0000658 fj | FBgn0039129 <b>RpS19b</b>        | 0 0 1 1 | 2 |
| FBgn0000658 fj | FBgn0034138 <b>RpS15</b>         | 0 1 0 1 | 2 |
| FBgn0000658 fj | FBgn0261792 <b>snRNP-U1-C</b>    | 0 1 0 1 | 2 |
| FBgn0000658 fj | FBgn0037632 <b>Tcp-1eta</b>      | 0 0 1 1 | 2 |
| FBgn0000658 fj | FBgn0035987 <b>CG3689</b>        | 0 1 1 0 | 2 |
| FBgn0000658 fj | FBgn0023512 <b>eIF2B-epsilon</b> | 0 1 1 0 | 2 |
| FBgn0000658 fj | FBgn0261596 <b>RpS24</b>         | 0 1 0 1 | 2 |
| FBgn0000658 fj | FBgn0262735 <b>Imp</b>           | 0 0 1 1 | 2 |
| FBgn0000658 fj | FBgn0015245 <b>Hsp60</b>         | 0 1 0 1 | 2 |
| FBgn0000658 fj | FBgn0027494 <b>RpS10a</b>        | 0 1 1 0 | 2 |
| FBgn0000658 fj | FBgn0030672 <b>CG9281</b>        | 0 1 1 0 | 2 |
| FBgn0000658 fj | FBgn0036641 <b>Smn</b>           | 0 1 0 1 | 2 |
| FBgn0000658 fj | FBgn0029975 <b>CG1444</b>        | 0 0 1 1 | 2 |
| FBgn0000658 fj | FBgn0019644 <b>ATPsyn-b</b>      | 0 1 0 1 | 2 |
| FBgn0000658 fj | FBgn0002924 <b>ncd</b>           | 0 1 1 0 | 2 |
| FBgn0000658 fj | FBgn0010808 <b>I(3)03670</b>     | 0 1 1 0 | 2 |
| FBgn0000658 fj | FBgn0031392 <b>AIF</b>           | 0 1 0 1 | 2 |
| FBgn0000658 fj | FBgn0037249 <b>eIF3-S10</b>      | 0 1 1 0 | 2 |
| FBgn0000658 fj | FBgn0010516 <b>wal</b>           | 0 1 0 1 | 2 |
| FBgn0000658 fj | FBgn0021795 <b>Tapdelta</b>      | 0 1 0 1 | 2 |
| FBgn0000658 fj | FBgn0033897 <b>Rcd1</b>          | 0 1 1 0 | 2 |
| FBgn0000658 fj | FBgn0037137 <b>Nopp140</b>       | 0 1 0 1 | 2 |
| FBgn0000658 fj | FBgn0035600 <b>CG4769</b>        | 0 1 1 0 | 2 |
| FBgn0000658 fj | FBgn0005533 <b>RpS17</b>         | 0 1 0 1 | 2 |
| FBgn0000658 fj | FBgn0032643 <b>CG6453</b>        | 0 1 1 0 | 2 |
| FBgn0000658 fj | FBgn0023213 <b>eIF4G</b>         | 0 0 1 1 | 2 |
| FBgn0000658 fj | FBgn0034181 <b>CG8963</b>        | 0 0 1 1 | 2 |



## (A) entire PPIN

|                |                               |         |   |
|----------------|-------------------------------|---------|---|
| FBgn0000658 fj | FBgn0030943 <b>CG6540</b>     | 0 1 0 1 | 2 |
| FBgn0000658 fj | FBgn0037756 <b>CG8507</b>     | 0 0 1 1 | 2 |
| FBgn0000658 fj | FBgn0029687 <b>Vap-33-1</b>   | 0 1 0 1 | 2 |
| FBgn0000658 fj | FBgn0034313 <b>CG5726</b>     | 0 1 0 1 | 2 |
| FBgn0000658 fj | FBgn0001315 <b>kl-5</b>       | 0 0 1 1 | 2 |
| FBgn0000658 fj | FBgn0032035 <b>CG13393</b>    | 0 0 1 1 | 2 |
| FBgn0000658 fj | FBgn0029861 <b>CG3815</b>     | 0 0 1 1 | 2 |
| FBgn0000658 fj | FBgn0013756 <b>Mtor</b>       | 0 0 0 2 | 2 |
| FBgn0000658 fj | FBgn0041775 <b>tral</b>       | 0 0 1 1 | 2 |
| FBgn0000658 fj | FBgn0013726 <b>pnut</b>       | 0 0 1 1 | 2 |
| FBgn0000658 fj | FBgn0261618 <b>larp</b>       | 0 1 1 0 | 2 |
| FBgn0000658 fj | FBgn0259240 <b>Ten-a</b>      | 0 1 1 0 | 2 |
| FBgn0000658 fj | FBgn0041702 <b>CG15107</b>    | 0 1 1 0 | 2 |
| FBgn0000658 fj | FBgn0261608 <b>RpL37A</b>     | 0 1 0 1 | 2 |
| FBgn0000658 fj | FBgn0034432 <b>CG7461</b>     | 0 0 0 1 | 1 |
| FBgn0000658 fj | FBgn0034401 <b>CG15100</b>    | 0 0 0 1 | 1 |
| FBgn0000658 fj | FBgn0035589 <b>CHMP2B</b>     | 0 0 0 1 | 1 |
| FBgn0000658 fj | FBgn0033194 <b>Vps13</b>      | 0 1 0 0 | 1 |
| FBgn0000658 fj | FBgn0038476 <b>kuk</b>        | 0 1 0 0 | 1 |
| FBgn0000658 fj | FBgn0004168 <b>5-HT1A</b>     | 0 1 0 0 | 1 |
| FBgn0000658 fj | FBgn0037454 <b>CG1137</b>     | 0 1 0 0 | 1 |
| FBgn0000658 fj | FBgn0030992 <b>CG33253</b>    | 0 1 0 0 | 1 |
| FBgn0000658 fj | FBgn0003382 <b>sha</b>        | 0 0 1 0 | 1 |
| FBgn0000658 fj | FBgn0032359 <b>Osi21</b>      | 0 1 0 0 | 1 |
| FBgn0000658 fj | FBgn0022023 <b>eIF-3p40</b>   | 0 1 0 0 | 1 |
| FBgn0000658 fj | FBgn0039359 <b>RpL27</b>      | 0 1 0 0 | 1 |
| FBgn0000658 fj | FBgn0051413 <b>CG31413</b>    | 0 1 0 0 | 1 |
| FBgn0000658 fj | FBgn0050421 <b>CG30421</b>    | 0 0 1 0 | 1 |
| FBgn0000658 fj | FBgn0263598 <b>Vha68-2</b>    | 0 0 0 1 | 1 |
| FBgn0000658 fj | FBgn0030086 <b>CG7033</b>     | 0 0 0 1 | 1 |
| FBgn0000658 fj | FBgn0024366 <b>CG11409</b>    | 0 0 0 1 | 1 |
| FBgn0000658 fj | FBgn0001075 <b>ft</b>         | 0 0 0 1 | 1 |
| FBgn0000658 fj | FBgn0035203 <b>CG9149</b>     | 0 0 0 1 | 1 |
| FBgn0000658 fj | FBgn0034345 <b>CG5174</b>     | 0 0 0 1 | 1 |
| FBgn0000658 fj | FBgn0052112 <b>CG32112</b>    | 0 1 0 0 | 1 |
| FBgn0000658 fj | FBgn0260462 <b>CG12163</b>    | 0 0 1 0 | 1 |
| FBgn0000658 fj | FBgn0051453 <b>pch2</b>       | 0 1 0 0 | 1 |
| FBgn0000658 fj | FBgn0028331 <b>I(1)G0289</b>  | 0 0 0 1 | 1 |
| FBgn0000658 fj | FBgn0030322 <b>CG15220</b>    | 0 0 1 0 | 1 |
| FBgn0000658 fj | FBgn0033579 <b>CG13229</b>    | 0 1 0 0 | 1 |
| FBgn0000658 fj | FBgn0037810 <b>sle</b>        | 0 0 1 0 | 1 |
| FBgn0000658 fj | FBgn0036793 <b>CG4174</b>     | 0 1 0 0 | 1 |
| FBgn0000658 fj | FBgn0260441 <b>RpS12</b>      | 0 0 1 0 | 1 |
| FBgn0000658 fj | FBgn0040089 <b>meso18E</b>    | 0 0 1 0 | 1 |
| FBgn0000658 fj | FBgn0036258 <b>CG5642</b>     | 0 0 1 0 | 1 |
| FBgn0000658 fj | FBgn0004907 <b>14-3-3zeta</b> | 0 0 1 0 | 1 |
| FBgn0000658 fj | FBgn0263198 <b>Acn</b>        | 0 0 1 0 | 1 |
| FBgn0000658 fj | FBgn0031285 <b>CG3662</b>     | 0 1 0 0 | 1 |
| FBgn0000658 fj | FBgn0039713 <b>RpS8</b>       | 0 1 0 0 | 1 |
| FBgn0000658 fj | FBgn0015737 <b>Hmu</b>        | 0 0 0 1 | 1 |
| FBgn0000658 fj | FBgn0039560 <b>CG5514</b>     | 0 1 0 0 | 1 |

## (A) entire PPIN

|                |                                  |         |   |
|----------------|----------------------------------|---------|---|
| FBgn0000658 fj | FBgn0025637 <b>skpA</b>          | 0 0 1 0 | 1 |
| FBgn0000658 fj | FBgn0030109 <b>CG12121</b>       | 0 0 1 0 | 1 |
| FBgn0000658 fj | FBgn0263355 <b>CG31688</b>       | 0 1 0 0 | 1 |
| FBgn0000658 fj | FBgn0035009 <b>CG16837</b>       | 0 1 0 0 | 1 |
| FBgn0000658 fj | FBgn0024833 <b>AP-47</b>         | 0 0 1 0 | 1 |
| FBgn0000658 fj | FBgn0039066 <b>EloA</b>          | 0 0 0 1 | 1 |
| FBgn0000658 fj | FBgn0032973 <b>CG6675</b>        | 0 1 0 0 | 1 |
| FBgn0000658 fj | FBgn0010438 <b>mtSSB</b>         | 0 0 1 0 | 1 |
| FBgn0000658 fj | FBgn0012036 <b>Aldh</b>          | 0 0 1 0 | 1 |
| FBgn0000658 fj | FBgn0034968 <b>RpL12</b>         | 0 1 0 0 | 1 |
| FBgn0000658 fj | FBgn0013972 <b>Gycalpha99B</b>   | 0 0 1 0 | 1 |
| FBgn0000658 fj | FBgn0050125 <b>Ir56a</b>         | 0 0 0 1 | 1 |
| FBgn0000658 fj | FBgn0052479 <b>CG32479</b>       | 0 0 1 0 | 1 |
| FBgn0000658 fj | FBgn0262125 <b>sec23</b>         | 0 0 1 0 | 1 |
| FBgn0000658 fj | FBgn0033342 <b>CG8258</b>        | 0 0 1 0 | 1 |
| FBgn0000658 fj | FBgn0023521 <b>CG3587</b>        | 0 1 0 0 | 1 |
| FBgn0000658 fj | FBgn0034277 <b>CG6370</b>        | 0 1 0 0 | 1 |
| FBgn0000658 fj | FBgn0034924 <b>CG17658</b>       | 0 0 0 1 | 1 |
| FBgn0000658 fj | FBgn0262126 <b>gho</b>           | 0 0 0 1 | 1 |
| FBgn0000658 fj | FBgn0261458 <b>capt</b>          | 0 0 0 1 | 1 |
| FBgn0000658 fj | FBgn0028695 <b>Rpn1</b>          | 0 0 1 0 | 1 |
| FBgn0000658 fj | FBgn0039272 <b>CG11836</b>       | 0 0 0 1 | 1 |
| FBgn0000658 fj | FBgn0041188 <b>Atx2</b>          | 0 0 0 1 | 1 |
| FBgn0000658 fj | FBgn0086347 <b>Myo31DF</b>       | 0 1 0 0 | 1 |
| FBgn0000658 fj | FBgn0038369 <b>Arpc3A</b>        | 0 1 0 0 | 1 |
| FBgn0000658 fj | FBgn0040333 <b>brv3</b>          | 0 0 0 1 | 1 |
| FBgn0000658 fj | FBgn0034066 <b>CG8397</b>        | 0 0 0 1 | 1 |
| FBgn0000658 fj | FBgn0038106 <b>CG7488</b>        | 0 0 1 0 | 1 |
| FBgn0000658 fj | FBgn0011823 <b>Pen</b>           | 0 0 0 1 | 1 |
| FBgn0000658 fj | FBgn0032833 <b>CG10664</b>       | 0 0 0 1 | 1 |
| FBgn0000658 fj | FBgn0039536 <b>CG18437</b>       | 0 0 0 1 | 1 |
| FBgn0000658 fj | FBgn0033879 <b>CG6543</b>        | 0 0 0 1 | 1 |
| FBgn0000658 fj | FBgn0040299 <b>Myo28B1</b>       | 0 0 0 1 | 1 |
| FBgn0000658 fj | FBgn0086443 <b>Aats-asn</b>      | 0 0 1 0 | 1 |
| FBgn0000658 fj | FBgn0039537 <b>CG5590</b>        | 0 0 0 1 | 1 |
| FBgn0000658 fj | FBgn0086691 <b>UK114</b>         | 0 1 0 0 | 1 |
| FBgn0000658 fj | FBgn0033085 <b>CG15908</b>       | 0 0 1 0 | 1 |
| FBgn0000658 fj | FBgn0261387 <b>CG17528</b>       | 0 1 0 0 | 1 |
| FBgn0000658 fj | FBgn0013810 <b>Dhc36C</b>        | 0 0 0 1 | 1 |
| FBgn0000658 fj | FBgn0037301 <b>Mms19</b>         | 0 0 1 0 | 1 |
| FBgn0000658 fj | FBgn0043456 <b>CG4747</b>        | 0 0 1 0 | 1 |
| FBgn0000658 fj | FBgn0001092 <b>Gapdh2</b>        | 0 0 0 1 | 1 |
| FBgn0000658 fj | FBgn0040007 <b>RpL38</b>         | 0 0 0 1 | 1 |
| FBgn0000658 fj | FBgn0020756 <b>DNApol-epsilc</b> | 0 0 0 1 | 1 |
| FBgn0000658 fj | FBgn0052463 <b>CG32463</b>       | 0 0 0 1 | 1 |
| FBgn0000658 fj | FBgn0024352 <b>Hop</b>           | 0 0 0 1 | 1 |
| FBgn0000658 fj | FBgn0000043 <b>Act42A</b>        | 0 0 1 0 | 1 |
| FBgn0000658 fj | FBgn0016120 <b>ATPsyn-d</b>      | 0 0 0 1 | 1 |
| FBgn0000658 fj | FBgn0032168 <b>CG13126</b>       | 0 0 1 0 | 1 |
| FBgn0000658 fj | FBgn0035165 <b>CG13887</b>       | 0 1 0 0 | 1 |
| FBgn0000658 fj | FBgn0002579 <b>RpL36</b>         | 0 1 0 0 | 1 |

## (A) entire PPIN

|             |    |             |                    |              |     |
|-------------|----|-------------|--------------------|--------------|-----|
| FBgn0000658 | fj | FBgn0039000 | <b>CG6954</b>      | 0 0 0 1      | 1   |
| FBgn0000658 | fj | FBgn0004587 | <b>B52</b>         | 0 1 0 0      | 1   |
| FBgn0000658 | fj | FBgn0015907 | <b>bl</b>          | 0 0 1 0      | 1   |
| FBgn0000658 | fj | FBgn0262719 | <b>CG43163</b>     | 0 0 0 1      | 1   |
| FBgn0000658 | fj | FBgn0027338 | <b>Kap-alpha3</b>  | 0 1 0 0      | 1   |
| FBgn0000658 | fj | FBgn0037409 | <b>CG15589</b>     | 0 0 0 1      | 1   |
| FBgn0000658 | fj | FBgn0015806 | <b>S6k</b>         | 0 0 0 1      | 1   |
| FBgn0000658 | fj | FBgn0031118 | <b>RhoGAP19D</b>   | 0 0 1 0      | 1   |
| FBgn0000658 | fj | FBgn0004362 | <b>HmgD</b>        | 0 0 0 1      | 1   |
| FBgn0000658 | fj | FBgn0013576 | <b>I(3)82Fd</b>    | 0 1 0 0      | 1   |
| FBgn0000658 | fj | FBgn0260858 | <b>Ykt6</b>        | 0 0 0 1      | 1   |
| FBgn0000658 | fj | FBgn0002787 | <b>Mov34</b>       | 0 0 0 1      | 1   |
| FBgn0000658 | fj | FBgn0033845 | <b>mars</b>        | 0 0 1 0      | 1   |
| FBgn0000658 | fj | FBgn0038499 | <b>Brf</b>         | 0 1 0 0      | 1   |
| FBgn0000658 | fj | FBgn0038857 | <b>CG17282</b>     | 0 1 0 0      | 1   |
| FBgn0000658 | fj | FBgn0028554 | <b>x16</b>         | 0 0 0 1      | 1   |
| FBgn0000658 | fj | FBgn0040309 | <b>Jafrac1</b>     | 0 0 0 1      | 1   |
| FBgn0000658 | fj | FBgn0035753 | <b>RpL18</b>       | 0 1 0 0      | 1   |
| FBgn0000658 | fj | FBgn0004574 | <b>Rop</b>         | 0 0 0 1      | 1   |
| FBgn0000658 | fj | FBgn0011638 | <b>La</b>          | 0 0 0 1      | 1   |
| FBgn0000658 | fj | FBgn0004867 | <b>RpS2</b>        | 0 0 1 0      | 1   |
| FBgn0000658 | fj | FBgn0030970 | <b>CG7326</b>      | 0 0 0 1      | 1   |
| FBgn0000658 | fj | FBgn0040286 | <b>SC35</b>        | 0 1 0 0      | 1   |
| FBgn0000658 | fj | FBgn0010352 | <b>Nc73EF</b>      | 0 0 0 1      | 1   |
| FBgn0000658 | fj | FBgn0034089 | <b>CG8446</b>      | 0 0 0 1      | 1   |
| FBgn0000658 | fj | FBgn0261928 | <b>CG42795</b>     | 0 0 1 0      | 1   |
| FBgn0000658 | fj | FBgn0026372 | <b>RpL23A</b>      | 0 1 0 0      | 1   |
| FBgn0000658 | fj | FBgn0014141 | <b>cher</b>        | 0 1 0 0      | 1   |
| FBgn0000658 | fj | FBgn0024814 | <b>Cic</b>         | 0 0 0 1      | 1   |
| FBgn0000658 | fj | FBgn0016685 | <b>Nlp</b>         | 0 0 0 1      | 1   |
| FBgn0000658 | fj | FBgn0030956 | <b>CG18259</b>     | 0 0 0 1      | 1   |
| FBgn0000658 | fj | FBgn0003517 | <b>sta</b>         | 0 0 1 0      | 1   |
| FBgn0000658 | fj | FBgn0003719 | <b>tld</b>         | 0 0 0 1      | 1   |
| FBgn0000658 | fj | FBgn0034308 | <b>CG10915</b>     | 0 1 0 0      | 1   |
| FBgn0000658 | fj | FBgn0002069 | <b>Aats-asp</b>    | 0 0 0 1      | 1   |
| FBgn0000658 | fj | FBgn0020235 | <b>ATPsyn-gamn</b> | 0 0 1 0      | 1   |
| FBgn0000658 | fj | FBgn0020255 | <b>ran</b>         | 0 0 0 1      | 1   |
| FBgn0000658 | fj | FBgn0037051 | <b>CG10565</b>     | 0 0 0 1      | 1   |
| FBgn0000658 | fj | FBgn0000317 | <b>ck</b>          | 0 1 0 0      | 1   |
| FBgn0000658 | fj | FBgn0263197 | <b>Patronin</b>    | 0 0 1 0      | 1   |
| FBgn0004583 | ex | FBgn0015245 | <b>Hsp60</b>       | 1 93 104 89  | 286 |
| FBgn0004583 | ex | FBgn0030993 | <b>Mec2</b>        | 1 15 15 11   | 41  |
| FBgn0004583 | ex | FBgn0036892 | <b>CG8798</b>      | 1 11 14 13   | 38  |
| FBgn0004583 | ex | FBgn0004638 | <b>drk</b>         | 1 7 6 7      | 20  |
| FBgn0004583 | ex | FBgn0020255 | <b>ran</b>         | 0.9 5 4 5    | 14  |
| FBgn0004583 | ex | FBgn0004227 | <b>nonA</b>        | 0.82 9 6 7   | 22  |
| FBgn0004583 | ex | FBgn0030956 | <b>CG18259</b>     | 0.77 2 3 3   | 8   |
| FBgn0004583 | ex | FBgn0039129 | <b>RpS19b</b>      | 0.74 6 2 2   | 10  |
| FBgn0004583 | ex | FBgn0027598 | <b>cindr</b>       | 0.71 7 5 2   | 14  |
| FBgn0004583 | ex | FBgn0034970 | <b>yki</b>         | 0.67 10 9 11 | 30  |
| FBgn0004583 | ex | FBgn0027084 | <b>Aats-lys</b>    | 0.63 3 4 1   | 8   |

## (A) entire PPIN

|                |                                |                      |    |
|----------------|--------------------------------|----------------------|----|
| FBgn0004583 ex | FBgn0035500 <b>ens</b>         | <b>0.6</b> 2 2 2     | 6  |
| FBgn0004583 ex | FBgn0261397 <b>didum</b>       | <b>0.57</b> 15 7 12  | 34 |
| FBgn0004583 ex | FBgn0030992 <b>CG33253</b>     | <b>0.57</b> 1 2 3    | 6  |
| FBgn0004583 ex | FBgn0003261 <b>Rm62</b>        | <b>0.54</b> 21 10 10 | 41 |
| FBgn0004583 ex | FBgn0003022 <b>Ote</b>         | <b>0.54</b> 14 13 8  | 35 |
| FBgn0004583 ex | FBgn0028734 <b>Fmr1</b>        | <b>0.53</b> 11 7 7   | 25 |
| FBgn0004583 ex | FBgn0041775 <b>tral</b>        | <b>0.5</b> 6 2 3     | 11 |
| FBgn0004583 ex | FBgn0011571 <b>caz</b>         | <b>0.46</b> 3 1 1    | 5  |
| FBgn0004583 ex | FBgn0024556 <b>EfTuM</b>       | <b>0.44</b> 6 3 2    | 11 |
| FBgn0004583 ex | FBgn0025700 <b>CG5885</b>      | <b>0.43</b> 1 2 1    | 4  |
| FBgn0004583 ex | FBgn0037719 <b>bocksbeutel</b> | <b>0.4</b> 13 4 4    | 21 |
| FBgn0004583 ex | FBgn0000578 <b>ena</b>         | <b>0.37</b> 1 1 2    | 4  |
| FBgn0004583 ex | FBgn0005411 <b>U2af50</b>      | <b>0.37</b> 1 2 1    | 4  |
| FBgn0004583 ex | FBgn0037249 <b>eIF3-S10</b>    | <b>0.35</b> 3 2 1    | 6  |
| FBgn0004583 ex | FBgn0086783 <b>Mhc</b>         | <b>0.32</b> 0 0 20   | 20 |
| FBgn0004583 ex | FBgn0038805 <b>TFAM</b>        | <b>0.31</b> 7 1 1    | 9  |
| FBgn0004583 ex | FBgn0040284 <b>SF2</b>         | <b>0.31</b> 3 0 0    | 3  |
| FBgn0004583 ex | FBgn0023167 <b>SmD3</b>        | <b>0.31</b> 2 0 1    | 3  |
| FBgn0004583 ex | FBgn0000047 <b>Act88F</b>      | <b>0.28</b> 0 0 3    | 3  |
| FBgn0004583 ex | FBgn0087035 <b>AGO2</b>        | <b>0.27</b> 8 4 3    | 15 |
| FBgn0004583 ex | FBgn0011016 <b>SsRbeta</b>     | <b>0.27</b> 1 2 2    | 5  |
| FBgn0004583 ex | FBgn0010348 <b>Arf79F</b>      | <b>0.26</b> 3 2 1    | 6  |
| FBgn0004583 ex | FBgn0028479 <b>CG4389</b>      | <b>0.26</b> 2 3 1    | 6  |
| FBgn0004583 ex | FBgn0034270 <b>CG6401</b>      | <b>0.26</b> 2 0 1    | 3  |
| FBgn0004583 ex | FBgn0010516 <b>wal</b>         | <b>0.24</b> 2 3 1    | 6  |
| FBgn0004583 ex | FBgn0010774 <b>Aly</b>         | <b>0.24</b> 2 0 1    | 3  |
| FBgn0004583 ex | FBgn0032906 <b>RPA2</b>        | <b>0.23</b> 0 0 2    | 2  |
| FBgn0004583 ex | FBgn0262735 <b>Imp</b>         | <b>0.22</b> 0 2 0    | 2  |
| FBgn0004583 ex | FBgn0003449 <b>snf</b>         | <b>0.21</b> 2 1 1    | 4  |
| FBgn0004583 ex | FBgn0001091 <b>Gapdh1</b>      | <b>0.2</b> 0 0 2     | 2  |
| FBgn0004583 ex | FBgn0014026 <b>RpL7A</b>       | <b>0.2</b> 2 0 0     | 2  |
| FBgn0004583 ex | FBgn0034313 <b>CG5726</b>      | <b>0.18</b> 0 0 2    | 2  |
| FBgn0004583 ex | FBgn0263347 <b>Caf1</b>        | <b>0.17</b> 3 0 0    | 3  |
| FBgn0004583 ex | FBgn0261606 <b>RpL27A</b>      | <b>0.17</b> 2 0 0    | 2  |
| FBgn0004583 ex | FBgn0015218 <b>eIF-4E</b>      | <b>0.16</b> 2 1 0    | 3  |
| FBgn0004583 ex | FBgn0010226 <b>GstS1</b>       | <b>0.16</b> 0 0 2    | 2  |
| FBgn0004583 ex | FBgn0022959 <b>yps</b>         | <b>0.15</b> 1 3 1    | 5  |
| FBgn0004583 ex | FBgn0004401 <b>Pep</b>         | <b>0.15</b> 3 0 1    | 4  |
| FBgn0004583 ex | FBgn0010246 <b>Myo61F</b>      | <b>0.14</b> 5 8 3    | 16 |
| FBgn0004583 ex | FBgn0013981 <b>His4r</b>       | <b>0.14</b> 4 1 1    | 6  |
| FBgn0004583 ex | FBgn0003345 <b>sd</b>          | <b>0.14</b> 0 1 2    | 3  |
| FBgn0004583 ex | FBgn0005671 <b>Vha55</b>       | <b>0.14</b> 0 0 2    | 2  |
| FBgn0004583 ex | FBgn0029979 <b>CG10777</b>     | <b>0.13</b> 10 5 7   | 22 |
| FBgn0004583 ex | FBgn0261596 <b>RpS24</b>       | <b>0.13</b> 1 1 2    | 4  |
| FBgn0004583 ex | FBgn0013269 <b>FK506-bp1</b>   | <b>0.12</b> 3 3 2    | 8  |
| FBgn0004583 ex | FBgn0038965 <b>mats</b>        | <b>0.12</b> 0 1 2    | 3  |
| FBgn0004583 ex | FBgn0032731 <b>CG10641</b>     | <b>0.11</b> 6 6 3    | 15 |
| FBgn0004583 ex | FBgn0086356 <b>tum</b>         | <b>0.11</b> 3 1 0    | 4  |
| FBgn0004583 ex | FBgn0024987 <b>ssx</b>         | <b>0.1</b> 3 4 4     | 11 |
| FBgn0004583 ex | FBgn0010217 <b>ATPsyn-beta</b> | <b>0.09</b> 9 13 12  | 34 |
| FBgn0004583 ex | FBgn0042134 <b>Capr</b>        | <b>0.09</b> 9 6 5    | 20 |

## (A) entire PPIN

|                |                                |      |             |     |
|----------------|--------------------------------|------|-------------|-----|
| FBgn0004583 ex | FBgn0035987 <b>CG3689</b>      | 0.08 | 2 1 1       | 4   |
| FBgn0004583 ex | FBgn0064225 <b>RpL5</b>        | 0.08 | 0 2 1       | 3   |
| FBgn0004583 ex | FBgn0019936 <b>RpS20</b>       | 0.07 | 5 2 5       | 12  |
| FBgn0004583 ex | FBgn0025286 <b>RpL31</b>       | 0.07 | 4 2 2       | 8   |
| FBgn0004583 ex | FBgn0046214 <b>vig2</b>        | 0.07 | 2 4 1       | 7   |
| FBgn0004583 ex | FBgn0261609 <b>eIF-2alpha</b>  | 0.07 | 4 2 1       | 7   |
| FBgn0004583 ex | FBgn0010411 <b>RpS18</b>       | 0.07 | 2 2 1       | 5   |
| FBgn0004583 ex | FBgn0030612 <b>CG5599</b>      | 0.07 | 1 2 1       | 4   |
| FBgn0004583 ex | FBgn0013756 <b>Mtor</b>        | 0.06 | 8 5 3       | 16  |
| FBgn0004583 ex | FBgn0032444 <b>CG5525</b>      | 0.06 | 4 3 1       | 8   |
| FBgn0004583 ex | FBgn0033062 <b>Ars2</b>        | 0.06 | 2 1 0       | 3   |
| FBgn0004583 ex | FBgn0086656 <b>shrb</b>        | 0.05 | 2 2 0       | 4   |
| FBgn0004583 ex | FBgn0037643 <b>skap</b>        | 0.05 | 2 0 1       | 3   |
| FBgn0004583 ex | FBgn0261385 <b>scra</b>        | 0.05 | 2 0 0       | 2   |
| FBgn0004583 ex | FBgn0263396 <b>sqd</b>         | 0.04 | 6 7 4       | 17  |
| FBgn0004583 ex | FBgn0017545 <b>RpS3A</b>       | 0.04 | 3 3 3       | 9   |
| FBgn0004583 ex | FBgn0000173 <b>ben</b>         | 0.04 | 3 3 2       | 8   |
| FBgn0004583 ex | FBgn0001215 <b>Hrb98DE</b>     | 0.03 | 4 3 4       | 11  |
| FBgn0004583 ex | FBgn0004907 <b>14-3-3zeta</b>  | 0.03 | 1 2 2       | 5   |
| FBgn0004583 ex | FBgn0005533 <b>RpS17</b>       | 0.03 | 2 1 1       | 4   |
| FBgn0004583 ex | FBgn0000064 <b>Ald</b>         | 0.03 | 0 0 2       | 2   |
| FBgn0004583 ex | FBgn0263106 <b>DnaJ-1</b>      | 0.02 | 2 2 1       | 5   |
| FBgn0004583 ex | FBgn0086710 <b>RpL30</b>       | 0.02 | 2 1 1       | 4   |
| FBgn0004583 ex | FBgn0020279 <b>lig</b>         | 0.01 | 5 4 4       | 13  |
| FBgn0004583 ex | FBgn0036213 <b>RpL10Ab</b>     | 0.01 | 7 3 3       | 13  |
| FBgn0004583 ex | FBgn0010173 <b>RpA-70</b>      | 0.01 | 0 4 3       | 7   |
| FBgn0004583 ex | FBgn0000253 <b>Cam</b>         | 0.01 | 2 2 1       | 5   |
| FBgn0004583 ex | FBgn0030136 <b>RpS28b</b>      | 0.01 | 1 2 1       | 4   |
| FBgn0004583 ex | FBgn0035872 <b>CG7185</b>      | 0.01 | 2 1 0       | 3   |
| FBgn0004583 ex | FBgn0005634 <b>zip</b>         | 0    | 259 212 205 | 676 |
| FBgn0004583 ex | FBgn0000556 <b>Ef1alpha48D</b> | 0    | 45 54 39    | 138 |
| FBgn0004583 ex | FBgn0000042 <b>Act5C</b>       | 0    | 41 30 35    | 106 |
| FBgn0004583 ex | FBgn0002525 <b>Lam</b>         | 0    | 40 33 22    | 95  |
| FBgn0004583 ex | FBgn0003721 <b>Tm1</b>         | 0    | 34 31 23    | 88  |
| FBgn0004583 ex | FBgn0001219 <b>Hsc70-4</b>     | 0    | 30 31 27    | 88  |
| FBgn0004583 ex | FBgn0250789 <b>alpha-Spec</b>  | 0    | 23 17 18    | 58  |
| FBgn0004583 ex | FBgn0003887 <b>betaTub56D</b>  | 0    | 21 18 19    | 58  |
| FBgn0004583 ex | FBgn0000709 <b>fil1</b>        | 0    | 16 15 17    | 48  |
| FBgn0004583 ex | FBgn0263231 <b>bel</b>         | 0    | 17 17 14    | 48  |
| FBgn0004583 ex | FBgn0003884 <b>alphaTub84B</b> | 0    | 17 16 14    | 47  |
| FBgn0004583 ex | FBgn0261710 <b>nocte</b>       | 0    | 21 12 11    | 44  |
| FBgn0004583 ex | FBgn0030699 <b>CG8578</b>      | 0    | 17 14 12    | 43  |
| FBgn0004583 ex | FBgn0015778 <b>rin</b>         | 0    | 14 12 9     | 35  |
| FBgn0004583 ex | FBgn0001218 <b>Hsc70-3</b>     | 0    | 15 9 10     | 34  |
| FBgn0004583 ex | FBgn0004687 <b>Mlc-c</b>       | 0    | 9 12 9      | 30  |
| FBgn0004583 ex | FBgn0039757 <b>RpS7</b>        | 0    | 13 7 7      | 27  |
| FBgn0004583 ex | FBgn0261619 <b>pAbp</b>        | 0    | 11 8 8      | 27  |
| FBgn0004583 ex | FBgn0003178 <b>PyK</b>         | 0    | 11 9 6      | 26  |
| FBgn0004583 ex | FBgn0031977 <b>baf</b>         | 0    | 6 9 9       | 24  |
| FBgn0004583 ex | FBgn0002645 <b>Map205</b>      | 0    | 11 6 6      | 23  |
| FBgn0004583 ex | FBgn0037891 <b>CG5214</b>      | 0    | 10 3 7      | 20  |

## (A) entire PPIN

|                |                         |          |    |
|----------------|-------------------------|----------|----|
| FBgn0004583 ex | FBgn0002780 mod         | 0 7 7 6  | 20 |
| FBgn0004583 ex | FBgn0003360 sesB        | 0 6 7 7  | 20 |
| FBgn0004583 ex | FBgn0011211 blw         | 0 5 6 9  | 20 |
| FBgn0004583 ex | FBgn0001220 Hsc70-5     | 0 6 6 7  | 19 |
| FBgn0004583 ex | FBgn0029176 Ef1gamma    | 0 10 5 3 | 18 |
| FBgn0004583 ex | FBgn0039697 CG7834      | 0 8 5 5  | 18 |
| FBgn0004583 ex | FBgn0038145 Droj2       | 0 7 7 3  | 17 |
| FBgn0004583 ex | FBgn0040227 eIF-3p66    | 0 7 4 6  | 17 |
| FBgn0004583 ex | FBgn0001233 Hsp83       | 0 7 5 4  | 16 |
| FBgn0004583 ex | FBgn0082582 tmod        | 0 5 5 6  | 16 |
| FBgn0004583 ex | FBgn0034577 cpa         | 0 6 5 5  | 16 |
| FBgn0004583 ex | FBgn0001216 Hsc70-1     | 0 5 5 5  | 15 |
| FBgn0004583 ex | FBgn0000258 Ckl1alpha   | 0 5 5 5  | 15 |
| FBgn0004583 ex | FBgn0035499 Chd64       | 0 4 6 4  | 14 |
| FBgn0004583 ex | FBgn0000044 Act57B      | 0 3 5 5  | 13 |
| FBgn0004583 ex | FBgn0011225 jar         | 0 4 6 3  | 13 |
| FBgn0004583 ex | FBgn0263391 hts         | 0 6 2 5  | 13 |
| FBgn0004583 ex | FBgn0262734 Rbp2        | 0 3 5 4  | 12 |
| FBgn0004583 ex | FBgn0035608 blanks      | 0 4 4 3  | 11 |
| FBgn0004583 ex | FBgn0261456 hpo         | 0 4 4 3  | 11 |
| FBgn0004583 ex | FBgn0004888 Scsalpha    | 0 4 4 3  | 11 |
| FBgn0004583 ex | FBgn0013325 RpL11       | 0 4 3 4  | 11 |
| FBgn0004583 ex | FBgn0011570 cpb         | 0 5 3 3  | 11 |
| FBgn0004583 ex | FBgn0001942 eIF-4a      | 0 4 3 4  | 11 |
| FBgn0004583 ex | FBgn0261593 RpS10b      | 0 3 3 4  | 10 |
| FBgn0004583 ex | FBgn0003676 T-cp1       | 0 4 2 4  | 10 |
| FBgn0004583 ex | FBgn0011284 RpS4        | 0 4 3 3  | 10 |
| FBgn0004583 ex | FBgn0250814 CG4169      | 0 4 4 2  | 10 |
| FBgn0004583 ex | FBgn0010078 RpL23       | 0 5 2 3  | 10 |
| FBgn0004583 ex | FBgn0000181 bic         | 0 3 4 2  | 9  |
| FBgn0004583 ex | FBgn0015834 Trip1       | 0 6 1 2  | 9  |
| FBgn0004583 ex | FBgn0015756 RpL9        | 0 3 3 3  | 9  |
| FBgn0004583 ex | FBgn0028327 I(1)G0320   | 0 2 4 3  | 9  |
| FBgn0004583 ex | FBgn0028737 Ef1beta     | 0 4 2 2  | 8  |
| FBgn0004583 ex | FBgn0003732 Top2        | 0 4 1 3  | 8  |
| FBgn0004583 ex | FBgn0010198 RpS15Aa     | 0 3 2 3  | 8  |
| FBgn0004583 ex | FBgn0027932 Akap200     | 0 5 2 1  | 8  |
| FBgn0004583 ex | FBgn0003514 sqh         | 0 2 3 2  | 7  |
| FBgn0004583 ex | FBgn0003888 betaTub60D  | 0 3 2 2  | 7  |
| FBgn0004583 ex | FBgn0034968 RpL12       | 0 3 2 2  | 7  |
| FBgn0004583 ex | FBgn0086904 Nacalpha    | 0 3 2 2  | 7  |
| FBgn0004583 ex | FBgn0034743 RpS16       | 0 5 1 1  | 7  |
| FBgn0004583 ex | FBgn0004403 RpS14a      | 0 3 1 3  | 7  |
| FBgn0004583 ex | FBgn0004363 porin       | 0 2 3 2  | 7  |
| FBgn0004583 ex | FBgn0014269 prod        | 0 4 3 0  | 7  |
| FBgn0004583 ex | FBgn0014189 Hel25E      | 0 3 1 2  | 6  |
| FBgn0004583 ex | FBgn0003890 betaTub97EF | 0 2 2 2  | 6  |
| FBgn0004583 ex | FBgn0001217 Hsc70-2     | 0 2 2 2  | 6  |
| FBgn0004583 ex | FBgn0031256 CG4164      | 0 2 3 1  | 6  |
| FBgn0004583 ex | FBgn0002622 RpS3        | 0 4 1 1  | 6  |
| FBgn0004583 ex | FBgn0262716 Arp66B      | 0 1 2 2  | 5  |

## (A) entire PPIN

|                |                                  |         |   |
|----------------|----------------------------------|---------|---|
| FBgn0004583 ex | FBgn0027066 <b>Eb1</b>           | 0 2 1 2 | 5 |
| FBgn0004583 ex | FBgn0004167 <b>kst</b>           | 0 2 2 1 | 5 |
| FBgn0004583 ex | FBgn0027329 <b>Tcp-1zeta</b>     | 0 2 2 1 | 5 |
| FBgn0004583 ex | FBgn0004237 <b>Hrb87F</b>        | 0 2 2 1 | 5 |
| FBgn0004583 ex | FBgn0028969 <b>deltaCOP</b>      | 0 1 2 2 | 5 |
| FBgn0004583 ex | FBgn0039300 <b>RpS27</b>         | 0 1 1 2 | 4 |
| FBgn0004583 ex | FBgn0051363 <b>Jupiter</b>       | 0 2 1 1 | 4 |
| FBgn0004583 ex | FBgn0001961 <b>Sop2</b>          | 0 1 2 1 | 4 |
| FBgn0004583 ex | FBgn0029093 <b>cathD</b>         | 0 2 2 0 | 4 |
| FBgn0004583 ex | FBgn0000100 <b>RpLP0</b>         | 0 2 1 1 | 4 |
| FBgn0004583 ex | FBgn0015268 <b>Nap1</b>          | 0 1 1 1 | 3 |
| FBgn0004583 ex | FBgn0000559 <b>Ef2b</b>          | 0 0 2 1 | 3 |
| FBgn0004583 ex | FBgn0261119 <b>Prp19</b>         | 0 1 1 1 | 3 |
| FBgn0004583 ex | FBgn0005586 <b>Rab3</b>          | 0 1 1 1 | 3 |
| FBgn0004583 ex | FBgn0039776 <b>PH4alphaEFB</b>   | 0 2 1 0 | 3 |
| FBgn0004583 ex | FBgn0050122 <b>CG30122</b>       | 0 1 1 1 | 3 |
| FBgn0004583 ex | FBgn0002593 <b>RpLP1</b>         | 0 1 1 1 | 3 |
| FBgn0004583 ex | FBgn0001197 <b>His2Av</b>        | 0 1 1 1 | 3 |
| FBgn0004583 ex | FBgn0033902 <b>Tango7</b>        | 0 1 1 1 | 3 |
| FBgn0004583 ex | FBgn0024183 <b>vig</b>           | 0 1 1 1 | 3 |
| FBgn0004583 ex | FBgn0010333 <b>Rac1</b>          | 0 1 1 1 | 3 |
| FBgn0004583 ex | FBgn0026761 <b>Trap1</b>         | 0 1 1 1 | 3 |
| FBgn0004583 ex | FBgn0020910 <b>RpL3</b>          | 0 1 1 1 | 3 |
| FBgn0004583 ex | FBgn0014391 <b>sun</b>           | 0 1 1 1 | 3 |
| FBgn0004583 ex | FBgn0262603 <b>sec8</b>          | 0 0 2 1 | 3 |
| FBgn0004583 ex | FBgn0035753 <b>RpL18</b>         | 0 1 1 1 | 3 |
| FBgn0004583 ex | FBgn0015797 <b>Rab6</b>          | 0 1 1 1 | 3 |
| FBgn0004583 ex | FBgn0004867 <b>RpS2</b>          | 0 0 1 2 | 3 |
| FBgn0004583 ex | FBgn0026372 <b>RpL23A</b>        | 0 1 1 1 | 3 |
| FBgn0004583 ex | FBgn0003279 <b>RpL4</b>          | 0 1 1 1 | 3 |
| FBgn0004583 ex | FBgn0003517 <b>sta</b>           | 0 1 1 1 | 3 |
| FBgn0004583 ex | FBgn0000497 <b>ds</b>            | 0 1 1 1 | 3 |
| FBgn0004583 ex | FBgn0034138 <b>RpS15</b>         | 0 0 1 1 | 2 |
| FBgn0004583 ex | FBgn0015589 <b>Apc</b>           | 0 1 1 0 | 2 |
| FBgn0004583 ex | FBgn0004556 <b>Dbp73D</b>        | 0 0 1 1 | 2 |
| FBgn0004583 ex | FBgn0032359 <b>Osi21</b>         | 0 1 1 0 | 2 |
| FBgn0004583 ex | FBgn0020238 <b>14-3-3epsilon</b> | 0 0 1 1 | 2 |
| FBgn0004583 ex | FBgn0002031 <b>I(2)37Cc</b>      | 0 1 0 1 | 2 |
| FBgn0004583 ex | FBgn0032198 <b>eEF1delta</b>     | 0 0 1 1 | 2 |
| FBgn0004583 ex | FBgn0016700 <b>Rab1</b>          | 0 1 0 1 | 2 |
| FBgn0004583 ex | FBgn0011692 <b>pav</b>           | 0 2 0 0 | 2 |
| FBgn0004583 ex | FBgn0086768 <b>Pcmt</b>          | 0 1 1 0 | 2 |
| FBgn0004583 ex | FBgn0030086 <b>CG7033</b>        | 0 1 1 0 | 2 |
| FBgn0004583 ex | FBgn0053303 <b>CG33303</b>       | 0 1 1 0 | 2 |
| FBgn0004583 ex | FBgn0001075 <b>ft</b>            | 0 0 1 1 | 2 |
| FBgn0004583 ex | FBgn0039687 <b>CG7593</b>        | 0 0 1 1 | 2 |
| FBgn0004583 ex | FBgn0027494 <b>RpS10a</b>        | 0 1 1 0 | 2 |
| FBgn0004583 ex | FBgn0028470 <b>Patr-1</b>        | 0 1 1 0 | 2 |
| FBgn0004583 ex | FBgn0030692 <b>mRpS30</b>        | 0 0 1 1 | 2 |
| FBgn0004583 ex | FBgn0032859 <b>Arc-p34</b>       | 0 1 0 1 | 2 |
| FBgn0004583 ex | FBgn0037046 <b>CG10581</b>       | 0 0 1 1 | 2 |

## (A) entire PPIN

|                |                                  |         |   |
|----------------|----------------------------------|---------|---|
| FBgn0004583 ex | FBgn0032454 <b>CG5787</b>        | 0 1 0 1 | 2 |
| FBgn0004583 ex | FBgn0039713 <b>RpS8</b>          | 0 1 0 1 | 2 |
| FBgn0004583 ex | FBgn0022984 <b>qkr58E-3</b>      | 0 1 0 1 | 2 |
| FBgn0004583 ex | FBgn0038224 <b>CG3321</b>        | 0 1 0 1 | 2 |
| FBgn0004583 ex | FBgn0005648 <b>Pabp2</b>         | 0 1 0 1 | 2 |
| FBgn0004583 ex | FBgn0033109 <b>coro</b>          | 0 1 0 1 | 2 |
| FBgn0004583 ex | FBgn0261592 <b>RpS6</b>          | 0 1 0 1 | 2 |
| FBgn0004583 ex | FBgn0014133 <b>bif</b>           | 0 0 1 1 | 2 |
| FBgn0004583 ex | FBgn0010408 <b>RpS9</b>          | 0 1 0 1 | 2 |
| FBgn0004583 ex | FBgn0001092 <b>Gapdh2</b>        | 0 0 1 1 | 2 |
| FBgn0004583 ex | FBgn0053868 <b>His2B:CG3386</b>  | 0 0 1 1 | 2 |
| FBgn0004583 ex | FBgn0031437 <b>p16-ARC</b>       | 0 0 1 1 | 2 |
| FBgn0004583 ex | FBgn0032600 <b>CG17912</b>       | 0 1 0 1 | 2 |
| FBgn0004583 ex | FBgn0032987 <b>RpL21</b>         | 0 1 1 0 | 2 |
| FBgn0004583 ex | FBgn0037137 <b>Nopp140</b>       | 0 1 0 1 | 2 |
| FBgn0004583 ex | FBgn0262601 <b>SmB</b>           | 0 1 0 1 | 2 |
| FBgn0004583 ex | FBgn0032286 <b>CG7300</b>        | 0 0 1 1 | 2 |
| FBgn0004583 ex | FBgn0032518 <b>RpL24</b>         | 0 1 0 1 | 2 |
| FBgn0004583 ex | FBgn0033740 <b>dgt5</b>          | 0 0 1 1 | 2 |
| FBgn0004583 ex | FBgn0030943 <b>CG6540</b>        | 0 1 1 0 | 2 |
| FBgn0004583 ex | FBgn0014029 <b>Sep2</b>          | 0 2 0 0 | 2 |
| FBgn0004583 ex | FBgn0051618 <b>His2A:CG3161</b>  | 0 0 1 1 | 2 |
| FBgn0004583 ex | FBgn0002781 <b>mod(mdg4)</b>     | 0 1 1 0 | 2 |
| FBgn0004583 ex | FBgn0001315 <b>kl-5</b>          | 0 1 1 0 | 2 |
| FBgn0004583 ex | FBgn0003274 <b>RpLP2</b>         | 0 1 1 0 | 2 |
| FBgn0004583 ex | FBgn0013726 <b>pnut</b>          | 0 1 1 0 | 2 |
| FBgn0004583 ex | FBgn0000319 <b>Chc</b>           | 0 1 0 1 | 2 |
| FBgn0004583 ex | FBgn0000317 <b>ck</b>            | 0 1 0 1 | 2 |
| FBgn0004583 ex | FBgn0034432 <b>CG7461</b>        | 0 1 0 0 | 1 |
| FBgn0004583 ex | FBgn0035589 <b>CHMP2B</b>        | 0 0 0 1 | 1 |
| FBgn0004583 ex | FBgn0261933 <b>SmD1</b>          | 0 1 0 0 | 1 |
| FBgn0004583 ex | FBgn0035704 <b>CG10144</b>       | 0 0 0 1 | 1 |
| FBgn0004583 ex | FBgn0261792 <b>snRNP-U1-C</b>    | 0 0 0 1 | 1 |
| FBgn0004583 ex | FBgn0035512 <b>Cpr64Ac</b>       | 0 0 1 0 | 1 |
| FBgn0004583 ex | FBgn0263510 <b>nclb</b>          | 0 1 0 0 | 1 |
| FBgn0004583 ex | FBgn0261790 <b>SmE</b>           | 0 1 0 0 | 1 |
| FBgn0004583 ex | FBgn0029133 <b>REG</b>           | 0 0 1 0 | 1 |
| FBgn0004583 ex | FBgn0260986 <b>mei-38</b>        | 0 0 0 1 | 1 |
| FBgn0004583 ex | FBgn0037632 <b>Tcp-1eta</b>      | 0 0 0 1 | 1 |
| FBgn0004583 ex | FBgn0034085 <b>Ptp52F</b>        | 0 1 0 0 | 1 |
| FBgn0004583 ex | FBgn0086906 <b>sls</b>           | 0 0 0 1 | 1 |
| FBgn0004583 ex | FBgn0010434 <b>cora</b>          | 0 0 0 1 | 1 |
| FBgn0004583 ex | FBgn0263598 <b>Vha68-2</b>       | 0 1 0 0 | 1 |
| FBgn0004583 ex | FBgn0261274 <b>Ero1L</b>         | 0 0 0 1 | 1 |
| FBgn0004583 ex | FBgn0010265 <b>RpS13</b>         | 0 0 0 1 | 1 |
| FBgn0004583 ex | FBgn0020513 <b>ade5</b>          | 0 0 0 1 | 1 |
| FBgn0004583 ex | FBgn0052058 <b>lr67c</b>         | 0 0 0 1 | 1 |
| FBgn0004583 ex | FBgn0023512 <b>eIF2B-epsilon</b> | 0 0 1 0 | 1 |
| FBgn0004583 ex | FBgn0043534 <b>Obp57b</b>        | 0 0 1 0 | 1 |
| FBgn0004583 ex | FBgn0052177 <b>Ndfip</b>         | 0 1 0 0 | 1 |
| FBgn0004583 ex | FBgn0003600 <b>Su(var)3-9</b>    | 0 0 1 0 | 1 |



## (A) entire PPIN

|                |                              |         |   |
|----------------|------------------------------|---------|---|
| FBgn0004583 ex | FBgn0026753 <b>Vha13</b>     | 0 1 0 0 | 1 |
| FBgn0004583 ex | FBgn0038989 <b>CG6937</b>    | 0 1 0 0 | 1 |
| FBgn0004583 ex | FBgn0031011 <b>CG8034</b>    | 0 0 1 0 | 1 |
| FBgn0004583 ex | FBgn0034083 <b>lbk</b>       | 0 1 0 0 | 1 |
| FBgn0004583 ex | FBgn0002431 <b>hyd</b>       | 0 0 0 1 | 1 |
| FBgn0004583 ex | FBgn0051453 <b>pch2</b>      | 0 1 0 0 | 1 |
| FBgn0004583 ex | FBgn0010342 <b>Map60</b>     | 0 1 0 0 | 1 |
| FBgn0004583 ex | FBgn0027082 <b>Aats-pro</b>  | 0 1 0 0 | 1 |
| FBgn0004583 ex | FBgn0030322 <b>CG15220</b>   | 0 0 0 1 | 1 |
| FBgn0004583 ex | FBgn0039562 <b>Gp93</b>      | 0 1 0 0 | 1 |
| FBgn0004583 ex | FBgn0002773 <b>Mlc2</b>      | 0 0 0 1 | 1 |
| FBgn0004583 ex | FBgn0011742 <b>Arp14D</b>    | 0 1 0 0 | 1 |
| FBgn0004583 ex | FBgn0030672 <b>CG9281</b>    | 0 1 0 0 | 1 |
| FBgn0004583 ex | FBgn0010551 <b>I(2)03709</b> | 0 1 0 0 | 1 |
| FBgn0004583 ex | FBgn0036836 <b>CG11619</b>   | 0 0 1 0 | 1 |
| FBgn0004583 ex | FBgn0036761 <b>MED19</b>     | 0 0 0 1 | 1 |
| FBgn0004583 ex | FBgn0051849 <b>CG31849</b>   | 0 1 0 0 | 1 |
| FBgn0004583 ex | FBgn0011272 <b>RpL13</b>     | 0 1 0 0 | 1 |
| FBgn0004583 ex | FBgn0025637 <b>skpA</b>      | 0 1 0 0 | 1 |
| FBgn0004583 ex | FBgn0029118 <b>Suchb</b>     | 0 1 0 0 | 1 |
| FBgn0004583 ex | FBgn0010412 <b>RpS19a</b>    | 0 1 0 0 | 1 |
| FBgn0004583 ex | FBgn0032433 <b>Oatp33Ea</b>  | 0 0 1 0 | 1 |
| FBgn0004583 ex | FBgn0039229 <b>Saf-B</b>     | 0 1 0 0 | 1 |
| FBgn0004583 ex | FBgn0037059 <b>CG10510</b>   | 0 0 0 1 | 1 |
| FBgn0004583 ex | FBgn0263006 <b>Ca-P60A</b>   | 0 1 0 0 | 1 |
| FBgn0004583 ex | FBgn0015283 <b>Pros54</b>    | 0 1 0 0 | 1 |
| FBgn0004583 ex | FBgn0262125 <b>sec23</b>     | 0 1 0 0 | 1 |
| FBgn0004583 ex | FBgn0033342 <b>CG8258</b>    | 0 1 0 0 | 1 |
| FBgn0004583 ex | FBgn0031066 <b>CG14235</b>   | 0 1 0 0 | 1 |
| FBgn0004583 ex | FBgn0000212 <b>brm</b>       | 0 0 0 1 | 1 |
| FBgn0004583 ex | FBgn0025457 <b>Bub3</b>      | 0 1 0 0 | 1 |
| FBgn0004583 ex | FBgn0032943 <b>Tsp39D</b>    | 0 1 0 0 | 1 |
| FBgn0004583 ex | FBgn0037288 <b>CG14661</b>   | 0 1 0 0 | 1 |
| FBgn0004583 ex | FBgn0031764 <b>CG9107</b>    | 0 1 0 0 | 1 |
| FBgn0004583 ex | FBgn0035357 <b>MEP-1</b>     | 0 0 1 0 | 1 |
| FBgn0004583 ex | FBgn0014009 <b>Rab2</b>      | 0 1 0 0 | 1 |
| FBgn0004583 ex | FBgn0011823 <b>Pen</b>       | 0 0 0 1 | 1 |
| FBgn0004583 ex | FBgn0032833 <b>CG10664</b>   | 0 0 0 1 | 1 |
| FBgn0004583 ex | FBgn0029766 <b>CG15784</b>   | 0 0 0 1 | 1 |
| FBgn0004583 ex | FBgn0260990 <b>yata</b>      | 0 0 0 1 | 1 |
| FBgn0004583 ex | FBgn0053519 <b>Unc-89</b>    | 0 1 0 0 | 1 |
| FBgn0004583 ex | FBgn0000629 <b>E(z)</b>      | 0 1 0 0 | 1 |
| FBgn0004583 ex | FBgn0010409 <b>RpL18A</b>    | 0 1 0 0 | 1 |
| FBgn0004583 ex | FBgn0036728 <b>CG7580</b>    | 0 0 0 1 | 1 |
| FBgn0004583 ex | FBgn0040007 <b>RpL38</b>     | 0 0 0 1 | 1 |
| FBgn0004583 ex | FBgn0005536 <b>Mbs</b>       | 0 1 0 0 | 1 |
| FBgn0004583 ex | FBgn0035033 <b>CG3548</b>    | 0 1 0 0 | 1 |
| FBgn0004583 ex | FBgn0260010 <b>rump</b>      | 0 0 0 1 | 1 |
| FBgn0004583 ex | FBgn0004828 <b>His3.3B</b>   | 0 1 0 0 | 1 |
| FBgn0004583 ex | FBgn0031834 <b>CG13766</b>   | 0 0 1 0 | 1 |
| FBgn0004583 ex | FBgn0000579 <b>Eno</b>       | 0 0 0 1 | 1 |

## (A) entire PPIN

|                |                                |            |    |
|----------------|--------------------------------|------------|----|
| FBgn0004583 ex | FBgn0053523 <b>CG33523</b>     | 0 0 1 0    | 1  |
| FBgn0004583 ex | FBgn0027616 <b>YT521-B</b>     | 0 0 0 1    | 1  |
| FBgn0004583 ex | FBgn0035424 <b>CG11505</b>     | 0 1 0 0    | 1  |
| FBgn0004583 ex | FBgn0051352 <b>Unc-115a</b>    | 0 0 0 1    | 1  |
| FBgn0004583 ex | FBgn0035811 <b>CG12262</b>     | 0 1 0 0    | 1  |
| FBgn0004583 ex | FBgn0052463 <b>CG32463</b>     | 0 0 1 0    | 1  |
| FBgn0004583 ex | FBgn0033482 <b>CG1371</b>      | 0 0 0 1    | 1  |
| FBgn0004583 ex | FBgn0004378 <b>Klp61F</b>      | 0 1 0 0    | 1  |
| FBgn0004583 ex | FBgn0039581 <b>Moca-cyp</b>    | 0 0 1 0    | 1  |
| FBgn0004583 ex | FBgn0016120 <b>ATPsyn-d</b>    | 0 0 0 1    | 1  |
| FBgn0004583 ex | FBgn0010909 <b>msn</b>         | 0 1 0 0    | 1  |
| FBgn0004583 ex | FBgn0024432 <b>Dlc90F</b>      | 0 1 0 0    | 1  |
| FBgn0004583 ex | FBgn0022338 <b>dnk</b>         | 0 1 0 0    | 1  |
| FBgn0004583 ex | FBgn0035165 <b>CG13887</b>     | 0 1 0 0    | 1  |
| FBgn0004583 ex | FBgn0031781 <b>Arc-p20</b>     | 0 1 0 0    | 1  |
| FBgn0004583 ex | FBgn0029687 <b>Vap-33-1</b>    | 0 1 0 0    | 1  |
| FBgn0004583 ex | FBgn0032240 <b>CG17768</b>     | 0 1 0 0    | 1  |
| FBgn0004583 ex | FBgn0085447 <b>sif</b>         | 0 0 0 1    | 1  |
| FBgn0004583 ex | FBgn0011710 <b>Sep1</b>        | 0 0 1 0    | 1  |
| FBgn0004583 ex | FBgn0262719 <b>CG43163</b>     | 0 0 0 1    | 1  |
| FBgn0004583 ex | FBgn0027338 <b>Kap-alpha3</b>  | 0 0 1 0    | 1  |
| FBgn0004583 ex | FBgn0029899 <b>CG14438</b>     | 0 0 1 0    | 1  |
| FBgn0004583 ex | FBgn0040528 <b>CG15864</b>     | 0 0 0 1    | 1  |
| FBgn0004583 ex | FBgn0029897 <b>RpL17</b>       | 0 0 0 1    | 1  |
| FBgn0004583 ex | FBgn0004362 <b>HmgD</b>        | 0 0 1 0    | 1  |
| FBgn0004583 ex | FBgn0037924 <b>CG14712</b>     | 0 0 1 0    | 1  |
| FBgn0004583 ex | FBgn0031132 <b>CG15450</b>     | 0 1 0 0    | 1  |
| FBgn0004583 ex | FBgn0032035 <b>CG13393</b>     | 0 1 0 0    | 1  |
| FBgn0004583 ex | FBgn0040250 <b>Ugt86Dj</b>     | 0 0 1 0    | 1  |
| FBgn0004583 ex | FBgn0035398 <b>Cht7</b>        | 0 0 0 1    | 1  |
| FBgn0004583 ex | FBgn0038295 <b>Gyc88E</b>      | 0 0 0 1    | 1  |
| FBgn0004583 ex | FBgn0002772 <b>Mlc1</b>        | 0 0 0 1    | 1  |
| FBgn0004583 ex | FBgn0005633 <b>fln</b>         | 0 0 0 1    | 1  |
| FBgn0004583 ex | FBgn0031169 <b>CG1494</b>      | 0 0 0 1    | 1  |
| FBgn0004583 ex | FBgn0261597 <b>RpS26</b>       | 0 1 0 0    | 1  |
| FBgn0004583 ex | FBgn0010352 <b>Nc73EF</b>      | 0 0 0 1    | 1  |
| FBgn0004583 ex | FBgn0261648 <b>salm</b>        | 0 0 0 1    | 1  |
| FBgn0004583 ex | FBgn0033912 <b>RpS23</b>       | 0 0 1 0    | 1  |
| FBgn0004583 ex | FBgn0052301 <b>CG32301</b>     | 0 0 0 1    | 1  |
| FBgn0004583 ex | FBgn0037743 <b>CG8412</b>      | 0 0 1 0    | 1  |
| FBgn0004583 ex | FBgn0003719 <b>tld</b>         | 0 0 0 1    | 1  |
| FBgn0004583 ex | FBgn0032961 <b>CG1416</b>      | 0 0 1 0    | 1  |
| FBgn0004583 ex | FBgn0020235 <b>ATPsyn-gamn</b> | 0 0 0 1    | 1  |
| FBgn0004583 ex | FBgn0034654 <b>CG10306</b>     | 0 1 0 0    | 1  |
| FBgn0004583 ex | FBgn0053173 <b>CG33173</b>     | 0 0 0 1    | 1  |
| FBgn0004583 ex | FBgn0034398 <b>CG15098</b>     | 0 0 0 1    | 1  |
| FBgn0004583 ex | FBgn0262127 <b>kibra</b>       | 0 0 1 0    | 1  |
| FBgn0004583 ex | FBgn0038666 <b>CG5451</b>      | 0 0 1 0    | 1  |
| FBgn0004583 ex | FBgn0034237 <b>eIF3-S9</b>     | 0 1 0 0    | 1  |
| FBgn0000497 ds | FBgn0263006 <b>Ca-P60A</b>     | 1 13 11 12 | 36 |
| FBgn0000497 ds | FBgn0028331 <b>I(1)G0289</b>   | 1 9 11 15  | 35 |

## (A) entire PPIN

|                |                                |               |    |
|----------------|--------------------------------|---------------|----|
| FBgn0000497 ds | FBgn0023423 <b>slmb</b>        | 1 9 12 12     | 33 |
| FBgn0000497 ds | FBgn0028479 <b>CG4389</b>      | 1 12 11 8     | 31 |
| FBgn0000497 ds | FBgn0027598 <b>cindr</b>       | 1 8 12 7      | 27 |
| FBgn0000497 ds | FBgn0025352 <b>Thiolase</b>    | 1 10 8 8      | 26 |
| FBgn0000497 ds | FBgn0250814 <b>CG4169</b>      | 0.97 16 12 12 | 40 |
| FBgn0000497 ds | FBgn0032393 <b>CG12264</b>     | 0.92 3 4 3    | 10 |
| FBgn0000497 ds | FBgn0026409 <b>Mpcp</b>        | 0.88 4 4 4    | 12 |
| FBgn0000497 ds | FBgn0025637 <b>skpA</b>        | 0.88 3 5 3    | 11 |
| FBgn0000497 ds | FBgn0031093 <b>CG9581</b>      | 0.86 8 10 7   | 25 |
| FBgn0000497 ds | FBgn0025885 <b>Inos</b>        | 0.84 6 6 5    | 17 |
| FBgn0000497 ds | FBgn0052109 <b>CG32109</b>     | 0.82 3 3 3    | 9  |
| FBgn0000497 ds | FBgn0037894 <b>Ranbp9</b>      | 0.8 6 7 2     | 15 |
| FBgn0000497 ds | FBgn0037607 <b>CG8036</b>      | 0.77 4 4 2    | 10 |
| FBgn0000497 ds | FBgn0040284 <b>SF2</b>         | 0.67 1 3 4    | 8  |
| FBgn0000497 ds | FBgn0034138 <b>RpS15</b>       | 0.67 2 3 2    | 7  |
| FBgn0000497 ds | FBgn0022288 <b>I(2)09851</b>   | 0.66 4 4 2    | 10 |
| FBgn0000497 ds | FBgn0250848 <b>26-29-p</b>     | 0.64 3 3 1    | 7  |
| FBgn0000497 ds | FBgn0014163 <b>fax</b>         | 0.61 2 5 1    | 8  |
| FBgn0000497 ds | FBgn0040007 <b>RpL38</b>       | 0.6 2 3 1     | 6  |
| FBgn0000497 ds | FBgn0039776 <b>PH4alphaEFB</b> | 0.59 3 6 5    | 14 |
| FBgn0000497 ds | FBgn0005533 <b>RpS17</b>       | 0.5 3 5 2     | 10 |
| FBgn0000497 ds | FBgn0037182 <b>CG6838</b>      | 0.5 2 3 0     | 5  |
| FBgn0000497 ds | FBgn0261385 <b>scra</b>        | 0.49 4 3 2    | 9  |
| FBgn0000497 ds | FBgn0035471 <b>Sc2</b>         | 0.49 0 5 3    | 8  |
| FBgn0000497 ds | FBgn0033844 <b>bbc</b>         | 0.48 2 3 2    | 7  |
| FBgn0000497 ds | FBgn0261606 <b>RpL27A</b>      | 0.48 1 2 2    | 5  |
| FBgn0000497 ds | FBgn0015288 <b>RpL22</b>       | 0.47 1 3 1    | 5  |
| FBgn0000497 ds | FBgn0261397 <b>didum</b>       | 0.45 9 10 12  | 31 |
| FBgn0000497 ds | FBgn0039713 <b>RpS8</b>        | 0.44 1 2 3    | 6  |
| FBgn0000497 ds | FBgn0027571 <b>CG3523</b>      | 0.43 1 2 2    | 5  |
| FBgn0000497 ds | FBgn0011225 <b>jar</b>         | 0.42 9 6 11   | 26 |
| FBgn0000497 ds | FBgn0001220 <b>Hsc70-5</b>     | 0.4 26 27 22  | 75 |
| FBgn0000497 ds | FBgn0037912 <b>sea</b>         | 0.4 2 1 1     | 4  |
| FBgn0000497 ds | FBgn0035811 <b>CG12262</b>     | 0.39 2 6 2    | 10 |
| FBgn0000497 ds | FBgn0000578 <b>ena</b>         | 0.38 1 3 0    | 4  |
| FBgn0000497 ds | FBgn0001075 <b>ft</b>          | 0.34 1 1 6    | 8  |
| FBgn0000497 ds | FBgn0038965 <b>mats</b>        | 0.34 1 0 4    | 5  |
| FBgn0000497 ds | FBgn0015024 <b>Cklalpha</b>    | 0.34 1 2 1    | 4  |
| FBgn0000497 ds | FBgn0030752 <b>CG9947</b>      | 0.34 1 2 1    | 4  |
| FBgn0000497 ds | FBgn0013770 <b>Cp1</b>         | 0.32 2 1 1    | 4  |
| FBgn0000497 ds | FBgn0015282 <b>Pros26.4</b>    | 0.32 1 2 0    | 3  |
| FBgn0000497 ds | FBgn0261596 <b>RpS24</b>       | 0.3 2 2 2     | 6  |
| FBgn0000497 ds | FBgn0039208 <b>Esyt2</b>       | 0.3 2 3 0     | 5  |
| FBgn0000497 ds | FBgn0039580 <b>Gfat2</b>       | 0.29 3 3 4    | 10 |
| FBgn0000497 ds | FBgn0051370 <b>CG31370</b>     | 0.29 1 0 2    | 3  |
| FBgn0000497 ds | FBgn0010173 <b>RpA-70</b>      | 0.28 5 3 7    | 15 |
| FBgn0000497 ds | FBgn0027568 <b>Cand1</b>       | 0.28 3 2 1    | 6  |
| FBgn0000497 ds | FBgn0064225 <b>RpL5</b>        | 0.28 3 2 0    | 5  |
| FBgn0000497 ds | FBgn0010246 <b>Myo61F</b>      | 0.26 7 3 9    | 19 |
| FBgn0000497 ds | FBgn0260780 <b>wisp</b>        | 0.26 0 0 5    | 5  |
| FBgn0000497 ds | FBgn0003600 <b>Su(var)3-9</b>  | 0.25 1 1 2    | 4  |

## (A) entire PPIN

|                |                                 |      |             |     |
|----------------|---------------------------------|------|-------------|-----|
| FBgn0000497 ds | FBgn0022343 <b>CG3760</b>       | 0.24 | 1 2 1       | 4   |
| FBgn0000497 ds | FBgn0031589 <b>CG3714</b>       | 0.24 | 1 2 1       | 4   |
| FBgn0000497 ds | FBgn0028685 <b>Rpt4</b>         | 0.24 | 0 2 1       | 3   |
| FBgn0000497 ds | FBgn0020235 <b>ATPsyn-gamn</b>  | 0.24 | 1 2 0       | 3   |
| FBgn0000497 ds | FBgn0027607 <b>CG8230</b>       | 0.23 | 1 1 2       | 4   |
| FBgn0000497 ds | FBgn0037728 <b>CG16817</b>      | 0.23 | 2 1 0       | 3   |
| FBgn0000497 ds | FBgn0024509 <b>sec13</b>        | 0.23 | 0 2 0       | 2   |
| FBgn0000497 ds | FBgn0037643 <b>skap</b>         | 0.2  | 3 1 1       | 5   |
| FBgn0000497 ds | FBgn0261458 <b>capt</b>         | 0.2  | 1 2 0       | 3   |
| FBgn0000497 ds | FBgn0263594 <b>lost</b>         | 0.19 | 1 1 2       | 4   |
| FBgn0000497 ds | FBgn0032015 <b>CG7830</b>       | 0.19 | 0 2 0       | 2   |
| FBgn0000497 ds | FBgn0029092 <b>ced-6</b>        | 0.19 | 0 2 0       | 2   |
| FBgn0000497 ds | FBgn0033890 <b>Ctf4</b>         | 0.18 | 1 2 2       | 5   |
| FBgn0000497 ds | FBgn0023213 <b>eIF4G</b>        | 0.18 | 1 2 1       | 4   |
| FBgn0000497 ds | FBgn0034401 <b>CG15100</b>      | 0.18 | 2 0 0       | 2   |
| FBgn0000497 ds | FBgn0261014 <b>TER94</b>        | 0.16 | 0 2 1       | 3   |
| FBgn0000497 ds | FBgn0020369 <b>Pros45</b>       | 0.15 | 0 0 2       | 2   |
| FBgn0000497 ds | FBgn0030672 <b>CG9281</b>       | 0.14 | 3 3 2       | 8   |
| FBgn0000497 ds | FBgn0041775 <b>tral</b>         | 0.14 | 1 3 1       | 5   |
| FBgn0000497 ds | FBgn0032961 <b>CG1416</b>       | 0.14 | 0 2 0       | 2   |
| FBgn0000497 ds | FBgn0030659 <b>CG9215</b>       | 0.13 | 0 0 2       | 2   |
| FBgn0000497 ds | FBgn0003345 <b>sd</b>           | 0.12 | 0 0 2       | 2   |
| FBgn0000497 ds | FBgn0001197 <b>His2Av</b>       | 0.09 | 1 2 2       | 5   |
| FBgn0000497 ds | FBgn0002921 <b>Atpalpha</b>     | 0.09 | 0 2 1       | 3   |
| FBgn0000497 ds | FBgn0017545 <b>RpS3A</b>        | 0.08 | 2 4 2       | 8   |
| FBgn0000497 ds | FBgn0028687 <b>Rpt1</b>         | 0.08 | 4 2 2       | 8   |
| FBgn0000497 ds | FBgn0261551 <b>CG42669</b>      | 0.07 | 0 0 2       | 2   |
| FBgn0000497 ds | FBgn0053868 <b>His2B:CG3386</b> | 0.06 | 2 1 2       | 5   |
| FBgn0000497 ds | FBgn0261243 <b>Psa</b>          | 0.06 | 2 0 0       | 2   |
| FBgn0000497 ds | FBgn0032518 <b>RpL24</b>        | 0.05 | 1 2 1       | 4   |
| FBgn0000497 ds | FBgn0039562 <b>Gp93</b>         | 0.05 | 0 2 1       | 3   |
| FBgn0000497 ds | FBgn0030612 <b>CG5599</b>       | 0.05 | 1 0 2       | 3   |
| FBgn0000497 ds | FBgn0010348 <b>Arf79F</b>       | 0.05 | 0 2 0       | 2   |
| FBgn0000497 ds | FBgn0027835 <b>Dp1</b>          | 0.05 | 0 2 0       | 2   |
| FBgn0000497 ds | FBgn0004907 <b>14-3-3zeta</b>   | 0.04 | 2 2 0       | 4   |
| FBgn0000497 ds | FBgn0038934 <b>Gld2</b>         | 0.04 | 2 0 0       | 2   |
| FBgn0000497 ds | FBgn0039300 <b>RpS27</b>        | 0.03 | 1 3 4       | 8   |
| FBgn0000497 ds | FBgn0015268 <b>Nap1</b>         | 0.03 | 2 2 2       | 6   |
| FBgn0000497 ds | FBgn0086356 <b>tum</b>          | 0.03 | 2 1 1       | 4   |
| FBgn0000497 ds | FBgn0001215 <b>Hrb98DE</b>      | 0.02 | 2 4 3       | 9   |
| FBgn0000497 ds | FBgn0004867 <b>RpS2</b>         | 0.01 | 5 5 5       | 15  |
| FBgn0000497 ds | FBgn0003890 <b>betaTub97EF</b>  | 0.01 | 3 5 3       | 11  |
| FBgn0000497 ds | FBgn0029118 <b>Suchb</b>        | 0.01 | 2 3 3       | 8   |
| FBgn0000497 ds | FBgn0010408 <b>RpS9</b>         | 0.01 | 3 2 1       | 6   |
| FBgn0000497 ds | FBgn0037719 <b>bocksbeutel</b>  | 0.01 | 0 3 3       | 6   |
| FBgn0000497 ds | FBgn0032444 <b>CG5525</b>       | 0.01 | 3 1 2       | 6   |
| FBgn0000497 ds | FBgn0035424 <b>CG11505</b>      | 0.01 | 1 2 1       | 4   |
| FBgn0000497 ds | FBgn0013981 <b>His4r</b>        | 0.01 | 0 2 2       | 4   |
| FBgn0000497 ds | FBgn0037632 <b>Tcp-1eta</b>     | 0.01 | 2 0 0       | 2   |
| FBgn0000497 ds | FBgn0005634 <b>zip</b>          | 0    | 209 205 203 | 617 |
| FBgn0000497 ds | FBgn0001219 <b>Hsc70-4</b>      | 0    | 50 49 48    | 147 |

## (A) entire PPIN

|                |                                |            |     |
|----------------|--------------------------------|------------|-----|
| FBgn0000497 ds | FBgn0001218 <b>Hsc70-3</b>     | 0 39 42 37 | 118 |
| FBgn0000497 ds | FBgn0003884 <b>alphaTub84B</b> | 0 31 33 28 | 92  |
| FBgn0000497 ds | FBgn0003887 <b>betaTub56D</b>  | 0 27 32 29 | 88  |
| FBgn0000497 ds | FBgn0000042 <b>Act5C</b>       | 0 28 25 34 | 87  |
| FBgn0000497 ds | FBgn0000556 <b>Ef1alpha48D</b> | 0 29 27 27 | 83  |
| FBgn0000497 ds | FBgn0000709 <b>fil1</b>        | 0 19 12 26 | 57  |
| FBgn0000497 ds | FBgn0003178 <b>PyK</b>         | 0 18 16 19 | 53  |
| FBgn0000497 ds | FBgn0003721 <b>Tm1</b>         | 0 17 16 20 | 53  |
| FBgn0000497 ds | FBgn0030699 <b>CG8578</b>      | 0 14 14 19 | 47  |
| FBgn0000497 ds | FBgn0261710 <b>nocte</b>       | 0 18 12 13 | 43  |
| FBgn0000497 ds | FBgn0003360 <b>sesB</b>        | 0 11 16 13 | 40  |
| FBgn0000497 ds | FBgn0002525 <b>Lam</b>         | 0 12 14 11 | 37  |
| FBgn0000497 ds | FBgn0003514 <b>sqh</b>         | 0 14 11 11 | 36  |
| FBgn0000497 ds | FBgn0262603 <b>sec8</b>        | 0 11 16 7  | 34  |
| FBgn0000497 ds | FBgn0001233 <b>Hsp83</b>       | 0 10 11 10 | 31  |
| FBgn0000497 ds | FBgn0002645 <b>Map205</b>      | 0 10 11 10 | 31  |
| FBgn0000497 ds | FBgn0002622 <b>RpS3</b>        | 0 9 11 7   | 27  |
| FBgn0000497 ds | FBgn0004687 <b>Mlc-c</b>       | 0 10 6 9   | 25  |
| FBgn0000497 ds | FBgn0035499 <b>Chd64</b>       | 0 7 9 8    | 24  |
| FBgn0000497 ds | FBgn0263231 <b>bel</b>         | 0 7 10 7   | 24  |
| FBgn0000497 ds | FBgn0015778 <b>rin</b>         | 0 8 8 7    | 23  |
| FBgn0000497 ds | FBgn0039757 <b>RpS7</b>        | 0 7 10 6   | 23  |
| FBgn0000497 ds | FBgn0011284 <b>RpS4</b>        | 0 5 9 7    | 21  |
| FBgn0000497 ds | FBgn0034577 <b>cpa</b>         | 0 5 6 9    | 20  |
| FBgn0000497 ds | FBgn0003022 <b>Ote</b>         | 0 5 7 8    | 20  |
| FBgn0000497 ds | FBgn0003676 <b>T-cp1</b>       | 0 7 5 7    | 19  |
| FBgn0000497 ds | FBgn0004403 <b>RpS14a</b>      | 0 8 5 6    | 19  |
| FBgn0000497 ds | FBgn0263391 <b>hts</b>         | 0 5 8 5    | 18  |
| FBgn0000497 ds | FBgn0031977 <b>baf</b>         | 0 5 5 8    | 18  |
| FBgn0000497 ds | FBgn0262734 <b>Rbp2</b>        | 0 6 7 4    | 17  |
| FBgn0000497 ds | FBgn0034743 <b>RpS16</b>       | 0 7 5 5    | 17  |
| FBgn0000497 ds | FBgn0011211 <b>blw</b>         | 0 6 6 5    | 17  |
| FBgn0000497 ds | FBgn0250789 <b>alpha-Spec</b>  | 0 4 4 8    | 16  |
| FBgn0000497 ds | FBgn0000044 <b>Act57B</b>      | 0 5 5 6    | 16  |
| FBgn0000497 ds | FBgn0001216 <b>Hsc70-1</b>     | 0 4 5 5    | 14  |
| FBgn0000497 ds | FBgn0261619 <b>pAbp</b>        | 0 3 7 4    | 14  |
| FBgn0000497 ds | FBgn0082582 <b>tmod</b>        | 0 2 6 5    | 13  |
| FBgn0000497 ds | FBgn0003888 <b>betaTub60D</b>  | 0 3 6 4    | 13  |
| FBgn0000497 ds | FBgn0263396 <b>sqd</b>         | 0 4 3 5    | 12  |
| FBgn0000497 ds | FBgn0010078 <b>RpL23</b>       | 0 4 3 5    | 12  |
| FBgn0000497 ds | FBgn0011570 <b>cpb</b>         | 0 4 3 5    | 12  |
| FBgn0000497 ds | FBgn0000559 <b>Ef2b</b>        | 0 3 3 5    | 11  |
| FBgn0000497 ds | FBgn0032859 <b>Arc-p34</b>     | 0 3 3 5    | 11  |
| FBgn0000497 ds | FBgn0262716 <b>Arp66B</b>      | 0 4 2 4    | 10  |
| FBgn0000497 ds | FBgn0261593 <b>RpS10b</b>      | 0 3 3 3    | 9   |
| FBgn0000497 ds | FBgn0029176 <b>Ef1gamma</b>    | 0 3 4 2    | 9   |
| FBgn0000497 ds | FBgn0010217 <b>ATPsyn-beta</b> | 0 1 6 2    | 9   |
| FBgn0000497 ds | FBgn0020279 <b>lig</b>         | 0 2 4 3    | 9   |
| FBgn0000497 ds | FBgn0010198 <b>RpS15Aa</b>     | 0 3 3 3    | 9   |
| FBgn0000497 ds | FBgn0030993 <b>Mec2</b>        | 0 2 3 4    | 9   |
| FBgn0000497 ds | FBgn0011692 <b>pav</b>         | 0 2 3 3    | 8   |

## (A) entire PPIN

|                |                                |         |   |
|----------------|--------------------------------|---------|---|
| FBgn0000497 ds | FBgn0053303 <b>CG33303</b>     | 0 4 2 2 | 8 |
| FBgn0000497 ds | FBgn0001961 <b>Sop2</b>        | 0 3 2 3 | 8 |
| FBgn0000497 ds | FBgn0038145 <b>Droj2</b>       | 0 2 4 2 | 8 |
| FBgn0000497 ds | FBgn0000258 <b>Ckl1alpha</b>   | 0 3 2 3 | 8 |
| FBgn0000497 ds | FBgn0001942 <b>eIF-4a</b>      | 0 3 3 2 | 8 |
| FBgn0000497 ds | FBgn0027066 <b>Eb1</b>         | 0 2 2 3 | 7 |
| FBgn0000497 ds | FBgn0029093 <b>cathD</b>       | 0 0 4 3 | 7 |
| FBgn0000497 ds | FBgn0011710 <b>Sep1</b>        | 0 2 3 2 | 7 |
| FBgn0000497 ds | FBgn0003261 <b>Rm62</b>        | 0 1 5 1 | 7 |
| FBgn0000497 ds | FBgn0019936 <b>RpS20</b>       | 0 3 1 3 | 7 |
| FBgn0000497 ds | FBgn0001217 <b>Hsc70-2</b>     | 0 2 2 2 | 6 |
| FBgn0000497 ds | FBgn0031256 <b>CG4164</b>      | 0 1 3 2 | 6 |
| FBgn0000497 ds | FBgn0036213 <b>RpL10Ab</b>     | 0 2 1 3 | 6 |
| FBgn0000497 ds | FBgn0027329 <b>Tcp-1zeta</b>   | 0 2 2 2 | 6 |
| FBgn0000497 ds | FBgn0029979 <b>CG10777</b>     | 0 2 3 1 | 6 |
| FBgn0000497 ds | FBgn0013325 <b>RpL11</b>       | 0 3 1 2 | 6 |
| FBgn0000497 ds | FBgn0028327 <b>I(1)G0320</b>   | 0 3 1 2 | 6 |
| FBgn0000497 ds | FBgn0014189 <b>Hel25E</b>      | 0 0 1 4 | 5 |
| FBgn0000497 ds | FBgn0035608 <b>blanks</b>      | 0 1 1 3 | 5 |
| FBgn0000497 ds | FBgn0028737 <b>Ef1beta</b>     | 0 2 1 2 | 5 |
| FBgn0000497 ds | FBgn0051363 <b>Jupiter</b>     | 0 1 3 1 | 5 |
| FBgn0000497 ds | FBgn0011742 <b>Arp14D</b>      | 0 1 2 2 | 5 |
| FBgn0000497 ds | FBgn0028734 <b>Fmr1</b>        | 0 0 2 3 | 5 |
| FBgn0000497 ds | FBgn0086904 <b>Nacalpa</b>     | 0 2 2 1 | 5 |
| FBgn0000497 ds | FBgn0027932 <b>Akap200</b>     | 0 1 2 2 | 5 |
| FBgn0000497 ds | FBgn0040227 <b>eIF-3p66</b>    | 0 0 2 3 | 5 |
| FBgn0000497 ds | FBgn0013726 <b>pnut</b>        | 0 3 1 1 | 5 |
| FBgn0000497 ds | FBgn0003941 <b>RpL40</b>       | 0 3 1 1 | 5 |
| FBgn0000497 ds | FBgn0046214 <b>vig2</b>        | 0 1 2 1 | 4 |
| FBgn0000497 ds | FBgn0002780 <b>mod</b>         | 0 0 3 1 | 4 |
| FBgn0000497 ds | FBgn0000173 <b>ben</b>         | 0 1 2 1 | 4 |
| FBgn0000497 ds | FBgn0014029 <b>Sep2</b>        | 0 1 1 2 | 4 |
| FBgn0000497 ds | FBgn0004237 <b>Hrb87F</b>      | 0 1 1 2 | 4 |
| FBgn0000497 ds | FBgn0015756 <b>RpL9</b>        | 0 2 1 1 | 4 |
| FBgn0000497 ds | FBgn0000253 <b>Cam</b>         | 0 1 1 2 | 4 |
| FBgn0000497 ds | FBgn0028969 <b>deltaCOP</b>    | 0 1 2 1 | 4 |
| FBgn0000497 ds | FBgn0263351 <b>AP-50</b>       | 0 1 1 1 | 3 |
| FBgn0000497 ds | FBgn0025286 <b>RpL31</b>       | 0 1 0 2 | 3 |
| FBgn0000497 ds | FBgn0015664 <b>Dref</b>        | 0 1 1 1 | 3 |
| FBgn0000497 ds | FBgn0037551 <b>Gie</b>         | 0 1 1 1 | 3 |
| FBgn0000497 ds | FBgn0016700 <b>Rab1</b>        | 0 1 1 1 | 3 |
| FBgn0000497 ds | FBgn0027494 <b>RpS10a</b>      | 0 1 1 1 | 3 |
| FBgn0000497 ds | FBgn0000181 <b>bic</b>         | 0 1 1 1 | 3 |
| FBgn0000497 ds | FBgn0031310 <b>CG4764</b>      | 0 1 1 1 | 3 |
| FBgn0000497 ds | FBgn0015834 <b>Trip1</b>       | 0 1 2 0 | 3 |
| FBgn0000497 ds | FBgn0032746 <b>CG10470</b>     | 0 1 1 1 | 3 |
| FBgn0000497 ds | FBgn0260944 <b>Rbp1</b>        | 0 1 1 1 | 3 |
| FBgn0000497 ds | FBgn0042134 <b>Capr</b>        | 0 0 3 0 | 3 |
| FBgn0000497 ds | FBgn0026562 <b>BM-40-SPARC</b> | 0 1 1 1 | 3 |
| FBgn0000497 ds | FBgn0026761 <b>Trap1</b>       | 0 1 1 1 | 3 |
| FBgn0000497 ds | FBgn0005648 <b>Pabp2</b>       | 0 1 1 1 | 3 |

## (A) entire PPIN

|                |                                 |         |   |
|----------------|---------------------------------|---------|---|
| FBgn0000497 ds | FBgn0034968 <b>RpL12</b>        | 0 1 1 1 | 3 |
| FBgn0000497 ds | FBgn0033264 <b>Nup50</b>        | 0 1 1 1 | 3 |
| FBgn0000497 ds | FBgn0015019 <b>Cctgamma</b>     | 0 1 1 1 | 3 |
| FBgn0000497 ds | FBgn0032643 <b>CG6453</b>       | 0 1 1 1 | 3 |
| FBgn0000497 ds | FBgn0010909 <b>msn</b>          | 0 1 1 1 | 3 |
| FBgn0000497 ds | FBgn0031781 <b>Arc-p20</b>      | 0 0 1 2 | 3 |
| FBgn0000497 ds | FBgn0004888 <b>Scsalpha</b>     | 0 1 1 1 | 3 |
| FBgn0000497 ds | FBgn0037376 <b>CG2051</b>       | 0 1 1 1 | 3 |
| FBgn0000497 ds | FBgn0261597 <b>RpS26</b>        | 0 1 1 1 | 3 |
| FBgn0000497 ds | FBgn0023167 <b>SmD3</b>         | 0 1 1 1 | 3 |
| FBgn0000497 ds | FBgn0033912 <b>RpS23</b>        | 0 1 1 1 | 3 |
| FBgn0000497 ds | FBgn0034398 <b>CG15098</b>      | 0 1 1 1 | 3 |
| FBgn0000497 ds | FBgn0025683 <b>CG3164</b>       | 0 0 1 1 | 2 |
| FBgn0000497 ds | FBgn0003732 <b>Top2</b>         | 0 0 0 2 | 2 |
| FBgn0000497 ds | FBgn0005674 <b>Aats-glupro</b>  | 0 0 1 1 | 2 |
| FBgn0000497 ds | FBgn0005586 <b>Rab3</b>         | 0 1 0 1 | 2 |
| FBgn0000497 ds | FBgn0028342 <b>I(1)G0230</b>    | 0 1 1 0 | 2 |
| FBgn0000497 ds | FBgn0033453 <b>CG1667</b>       | 0 0 1 1 | 2 |
| FBgn0000497 ds | FBgn0063485 <b>Lasp</b>         | 0 0 1 1 | 2 |
| FBgn0000497 ds | FBgn0030322 <b>CG15220</b>      | 0 0 1 1 | 2 |
| FBgn0000497 ds | FBgn0031990 <b>CG8552</b>       | 0 1 1 0 | 2 |
| FBgn0000497 ds | FBgn0086357 <b>Sec61alpha</b>   | 0 1 1 0 | 2 |
| FBgn0000497 ds | FBgn0024987 <b>ssx</b>          | 0 0 1 1 | 2 |
| FBgn0000497 ds | FBgn0037891 <b>CG5214</b>       | 0 0 2 0 | 2 |
| FBgn0000497 ds | FBgn0032731 <b>CG10641</b>      | 0 0 0 2 | 2 |
| FBgn0000497 ds | FBgn0051550 <b>CG31550</b>      | 0 1 1 0 | 2 |
| FBgn0000497 ds | FBgn0020910 <b>RpL3</b>         | 0 1 1 0 | 2 |
| FBgn0000497 ds | FBgn0001230 <b>Hsp68</b>        | 0 1 0 1 | 2 |
| FBgn0000497 ds | FBgn0033109 <b>coro</b>         | 0 1 0 1 | 2 |
| FBgn0000497 ds | FBgn0028968 <b>gammaCop</b>     | 0 1 1 0 | 2 |
| FBgn0000497 ds | FBgn0025806 <b>Rap2I</b>        | 0 1 1 0 | 2 |
| FBgn0000497 ds | FBgn0003189 <b>r</b>            | 0 0 1 1 | 2 |
| FBgn0000497 ds | FBgn0037552 <b>CG7800</b>       | 0 1 0 1 | 2 |
| FBgn0000497 ds | FBgn0010516 <b>wal</b>          | 0 1 0 1 | 2 |
| FBgn0000497 ds | FBgn0016693 <b>Past1</b>        | 0 0 1 1 | 2 |
| FBgn0000497 ds | FBgn0043456 <b>CG4747</b>       | 0 0 1 1 | 2 |
| FBgn0000497 ds | FBgn0001092 <b>Gapdh2</b>       | 0 0 1 1 | 2 |
| FBgn0000497 ds | FBgn0004167 <b>kst</b>          | 0 0 0 2 | 2 |
| FBgn0000497 ds | FBgn0021795 <b>Tapdelta</b>     | 0 1 1 0 | 2 |
| FBgn0000497 ds | FBgn0086656 <b>shrb</b>         | 0 1 0 1 | 2 |
| FBgn0000497 ds | FBgn0032987 <b>RpL21</b>        | 0 0 1 1 | 2 |
| FBgn0000497 ds | FBgn0004378 <b>Klp61F</b>       | 0 0 1 1 | 2 |
| FBgn0000497 ds | FBgn0035763 <b>CG8602</b>       | 0 1 1 0 | 2 |
| FBgn0000497 ds | FBgn0024556 <b>EfTuM</b>        | 0 0 1 1 | 2 |
| FBgn0000497 ds | FBgn0029687 <b>Vap-33-1</b>     | 0 1 0 1 | 2 |
| FBgn0000497 ds | FBgn0051618 <b>His2A:CG3161</b> | 0 0 1 1 | 2 |
| FBgn0000497 ds | FBgn0086710 <b>RpL30</b>        | 0 1 1 0 | 2 |
| FBgn0000497 ds | FBgn0029897 <b>RpL17</b>        | 0 0 1 1 | 2 |
| FBgn0000497 ds | FBgn0001315 <b>kl-5</b>         | 0 0 1 1 | 2 |
| FBgn0000497 ds | FBgn0004363 <b>porin</b>        | 0 1 1 0 | 2 |
| FBgn0000497 ds | FBgn0087035 <b>AGO2</b>         | 0 1 0 1 | 2 |

## (A) entire PPIN

|                |                               |         |   |
|----------------|-------------------------------|---------|---|
| FBgn0000497 ds | FBgn0015797 <b>Rab6</b>       | 0 1 0 1 | 2 |
| FBgn0000497 ds | FBgn0020633 <b>Mcm7</b>       | 0 1 1 0 | 2 |
| FBgn0000497 ds | FBgn0000319 <b>Chc</b>        | 0 1 1 0 | 2 |
| FBgn0000497 ds | FBgn0014010 <b>Rab5</b>       | 0 0 1 1 | 2 |
| FBgn0000497 ds | FBgn0036623 <b>CG4729</b>     | 0 0 1 1 | 2 |
| FBgn0000497 ds | FBgn0261020 <b>wol</b>        | 0 1 0 1 | 2 |
| FBgn0000497 ds | FBgn0024238 <b>Fim</b>        | 0 1 1 0 | 2 |
| FBgn0000497 ds | FBgn0039302 <b>Nup358</b>     | 0 1 1 0 | 2 |
| FBgn0000497 ds | FBgn0020255 <b>ran</b>        | 0 1 1 0 | 2 |
| FBgn0000497 ds | FBgn0003392 <b>shi</b>        | 0 0 1 1 | 2 |
| FBgn0000497 ds | FBgn0032906 <b>RPA2</b>       | 0 0 0 1 | 1 |
| FBgn0000497 ds | FBgn0040237 <b>bor</b>        | 0 0 1 0 | 1 |
| FBgn0000497 ds | FBgn0013750 <b>Arf51F</b>     | 0 0 0 1 | 1 |
| FBgn0000497 ds | FBgn0033051 <b>dream</b>      | 0 0 1 0 | 1 |
| FBgn0000497 ds | FBgn0050185 <b>CG30185</b>    | 0 0 1 0 | 1 |
| FBgn0000497 ds | FBgn0038476 <b>kuk</b>        | 0 0 1 0 | 1 |
| FBgn0000497 ds | FBgn0261792 <b>snRNP-U1-C</b> | 0 0 1 0 | 1 |
| FBgn0000497 ds | FBgn0033272 <b>RagC</b>       | 0 0 1 0 | 1 |
| FBgn0000497 ds | FBgn0031362 <b>CG17646</b>    | 0 0 0 1 | 1 |
| FBgn0000497 ds | FBgn0032465 <b>CG12404</b>    | 0 0 1 0 | 1 |
| FBgn0000497 ds | FBgn0036861 <b>CG14089</b>    | 0 0 1 0 | 1 |
| FBgn0000497 ds | FBgn0037228 <b>CG1092</b>     | 0 0 1 0 | 1 |
| FBgn0000497 ds | FBgn0002031 <b>I(2)37Cc</b>   | 0 0 1 0 | 1 |
| FBgn0000497 ds | FBgn0036825 <b>RpL26</b>      | 0 0 1 0 | 1 |
| FBgn0000497 ds | FBgn0263598 <b>Vha68-2</b>    | 0 1 0 0 | 1 |
| FBgn0000497 ds | FBgn0053547 <b>Rim</b>        | 0 0 0 1 | 1 |
| FBgn0000497 ds | FBgn0037098 <b>Wnk</b>        | 0 0 0 1 | 1 |
| FBgn0000497 ds | FBgn0035987 <b>CG3689</b>     | 0 0 0 1 | 1 |
| FBgn0000497 ds | FBgn0003731 <b>Egfr</b>       | 0 0 0 1 | 1 |
| FBgn0000497 ds | FBgn0036003 <b>CG14180</b>    | 0 0 1 0 | 1 |
| FBgn0000497 ds | FBgn0262735 <b>Imp</b>        | 0 0 0 1 | 1 |
| FBgn0000497 ds | FBgn0032986 <b>CG3262</b>     | 0 0 0 1 | 1 |
| FBgn0000497 ds | FBgn0034345 <b>CG5174</b>     | 0 0 1 0 | 1 |
| FBgn0000497 ds | FBgn0002466 <b>sti</b>        | 0 0 1 0 | 1 |
| FBgn0000497 ds | FBgn0032749 <b>Phlpp</b>      | 0 0 1 0 | 1 |
| FBgn0000497 ds | FBgn0000064 <b>Ald</b>        | 0 0 1 0 | 1 |
| FBgn0000497 ds | FBgn0051453 <b>pch2</b>       | 0 0 1 0 | 1 |
| FBgn0000497 ds | FBgn0031643 <b>CG3008</b>     | 0 0 1 0 | 1 |
| FBgn0000497 ds | FBgn0034433 <b>endoB</b>      | 0 0 0 1 | 1 |
| FBgn0000497 ds | FBgn0024179 <b>wit</b>        | 0 0 0 1 | 1 |
| FBgn0000497 ds | FBgn0085427 <b>CG34398</b>    | 0 0 1 0 | 1 |
| FBgn0000497 ds | FBgn0053156 <b>CG33156</b>    | 0 1 0 0 | 1 |
| FBgn0000497 ds | FBgn0031107 <b>HERC2</b>      | 0 1 0 0 | 1 |
| FBgn0000497 ds | FBgn0034270 <b>CG6401</b>     | 0 1 0 0 | 1 |
| FBgn0000497 ds | FBgn0010551 <b>I(2)03709</b>  | 0 0 1 0 | 1 |
| FBgn0000497 ds | FBgn0004227 <b>nonA</b>       | 0 0 0 1 | 1 |
| FBgn0000497 ds | FBgn0011571 <b>caz</b>        | 0 0 0 1 | 1 |
| FBgn0000497 ds | FBgn0035401 <b>CG1291</b>     | 0 0 1 0 | 1 |
| FBgn0000497 ds | FBgn0028684 <b>Tbp-1</b>      | 0 0 1 0 | 1 |
| FBgn0000497 ds | FBgn0015790 <b>Rab11</b>      | 0 0 0 1 | 1 |
| FBgn0000497 ds | FBgn0033339 <b>sec31</b>      | 0 0 1 0 | 1 |



## (A) entire PPIN

|                |                         |         |   |
|----------------|-------------------------|---------|---|
| FBgn0000497 ds | FBgn0031759 lid         | 0 0 0 1 | 1 |
| FBgn0000497 ds | FBgn0002593 RpLP1       | 0 0 1 0 | 1 |
| FBgn0000497 ds | FBgn0026585 Ent2        | 0 0 1 0 | 1 |
| FBgn0000497 ds | FBgn0027583 CG7601      | 0 0 1 0 | 1 |
| FBgn0000497 ds | FBgn0010621 Cct5        | 0 0 1 0 | 1 |
| FBgn0000497 ds | FBgn0051386 CR31386     | 0 0 0 1 | 1 |
| FBgn0000497 ds | FBgn0036892 CG8798      | 0 1 0 0 | 1 |
| FBgn0000497 ds | FBgn0029785 RpL35       | 0 1 0 0 | 1 |
| FBgn0000497 ds | FBgn0033699 RpS11       | 0 0 0 1 | 1 |
| FBgn0000497 ds | FBgn0010379 Akt1        | 0 0 1 0 | 1 |
| FBgn0000497 ds | FBgn0261524 lic         | 0 0 1 0 | 1 |
| FBgn0000497 ds | FBgn0040233 cana        | 0 0 0 1 | 1 |
| FBgn0000497 ds | FBgn0029975 CG1444      | 0 0 1 0 | 1 |
| FBgn0000497 ds | FBgn0035380 CG9970      | 0 0 1 0 | 1 |
| FBgn0000497 ds | FBgn0002542 lds         | 0 0 1 0 | 1 |
| FBgn0000497 ds | FBgn0024833 AP-47       | 0 1 0 0 | 1 |
| FBgn0000497 ds | FBgn0010438 mtSSB       | 0 0 1 0 | 1 |
| FBgn0000497 ds | FBgn0030947 CG6696      | 0 1 0 0 | 1 |
| FBgn0000497 ds | FBgn0014391 sun         | 0 0 0 1 | 1 |
| FBgn0000497 ds | FBgn0023521 CG3587      | 0 0 1 0 | 1 |
| FBgn0000497 ds | FBgn0259139 glo         | 0 1 0 0 | 1 |
| FBgn0000497 ds | FBgn0011227 ox          | 0 0 1 0 | 1 |
| FBgn0000497 ds | FBgn0030136 RpS28b      | 0 0 1 0 | 1 |
| FBgn0000497 ds | FBgn0028695 Rpn1        | 0 0 1 0 | 1 |
| FBgn0000497 ds | FBgn0032601 yellow-b    | 0 0 1 0 | 1 |
| FBgn0000497 ds | FBgn0039726 eIF2B-alpha | 0 1 0 0 | 1 |
| FBgn0000497 ds | FBgn0030613 rab3-GEF    | 0 0 0 1 | 1 |
| FBgn0000497 ds | FBgn0261592 RpS6        | 0 0 1 0 | 1 |
| FBgn0000497 ds | FBgn0014133 bif         | 0 0 0 1 | 1 |
| FBgn0000497 ds | FBgn0083959 trpm        | 0 0 1 0 | 1 |
| FBgn0000497 ds | FBgn0030969 CG7288      | 0 0 1 0 | 1 |
| FBgn0000497 ds | FBgn0002638 Bj1         | 0 0 1 0 | 1 |
| FBgn0000497 ds | FBgn0260990 yata        | 0 0 1 0 | 1 |
| FBgn0000497 ds | FBgn0053113 Rtnl1       | 0 0 1 0 | 1 |
| FBgn0000497 ds | FBgn0014143 croc        | 0 0 1 0 | 1 |
| FBgn0000497 ds | FBgn0003346 RanGap      | 0 0 1 0 | 1 |
| FBgn0000497 ds | FBgn0032456 MRP         | 0 1 0 0 | 1 |
| FBgn0000497 ds | FBgn0039858 CycG        | 0 0 0 1 | 1 |
| FBgn0000497 ds | FBgn0011336 OstStt3     | 0 0 0 1 | 1 |
| FBgn0000497 ds | FBgn0086134 Pros25      | 0 0 1 0 | 1 |
| FBgn0000497 ds | FBgn0030809 CG9086      | 0 0 1 0 | 1 |
| FBgn0000497 ds | FBgn0029882 CG3226      | 0 1 0 0 | 1 |
| FBgn0000497 ds | FBgn0000579 Eno         | 0 1 0 0 | 1 |
| FBgn0000497 ds | FBgn0261068 LSm7        | 0 1 0 0 | 1 |
| FBgn0000497 ds | FBgn0036398 CG9007      | 0 1 0 0 | 1 |
| FBgn0000497 ds | FBgn0031437 p16-ARC     | 0 0 0 1 | 1 |
| FBgn0000497 ds | FBgn0053523 CG33523     | 0 0 1 0 | 1 |
| FBgn0000497 ds | FBgn0035229 CG7852      | 0 1 0 0 | 1 |
| FBgn0000497 ds | FBgn0043043 desat2      | 0 0 1 0 | 1 |
| FBgn0000497 ds | FBgn0037137 Nopp140     | 0 0 0 1 | 1 |
| FBgn0000497 ds | FBgn0037236 CG9772      | 0 0 0 1 | 1 |

(A) entire PPIN

|                |                        |         |   |
|----------------|------------------------|---------|---|
| FBgn0000497 ds | FBgn0036141 wls        | 0 0 1 0 | 1 |
| FBgn0000497 ds | FBgn0020618 Rack1      | 0 0 1 0 | 1 |
| FBgn0000497 ds | FBgn0262601 SmB        | 0 0 0 1 | 1 |
| FBgn0000497 ds | FBgn0025725 alphaCop   | 0 0 1 0 | 1 |
| FBgn0000497 ds | FBgn0010488 NAT1       | 0 0 1 0 | 1 |
| FBgn0000497 ds | FBgn0263048 CG43343    | 0 0 0 1 | 1 |
| FBgn0000497 ds | FBgn0024985 CG11448    | 0 0 1 0 | 1 |
| FBgn0000497 ds | FBgn0035617 I(3)psg2   | 0 0 0 1 | 1 |
| FBgn0000497 ds | FBgn0036685 CG6664     | 0 1 0 0 | 1 |
| FBgn0000497 ds | FBgn0033740 dgt5       | 0 0 1 0 | 1 |
| FBgn0000497 ds | FBgn0030943 CG6540     | 0 1 0 0 | 1 |
| FBgn0000497 ds | FBgn0025700 CG5885     | 0 0 1 0 | 1 |
| FBgn0000497 ds | FBgn0052230 CG32230    | 0 0 0 1 | 1 |
| FBgn0000497 ds | FBgn0038135 CG8773     | 0 0 0 1 | 1 |
| FBgn0000497 ds | FBgn0259168 mnb        | 0 0 1 0 | 1 |
| FBgn0000497 ds | FBgn0025739 pon        | 0 0 1 0 | 1 |
| FBgn0000497 ds | FBgn0035688 CG10289    | 0 0 1 0 | 1 |
| FBgn0000497 ds | FBgn0014861 McM2       | 0 0 1 0 | 1 |
| FBgn0000497 ds | FBgn0001186 Hex-A      | 0 0 1 0 | 1 |
| FBgn0000497 ds | FBgn0263106 DnaJ-1     | 0 0 0 1 | 1 |
| FBgn0000497 ds | FBgn0029959 Rab39      | 0 0 1 0 | 1 |
| FBgn0000497 ds | FBgn0013733 shot       | 0 1 0 0 | 1 |
| FBgn0000497 ds | FBgn0032340 Ge-1       | 0 0 1 0 | 1 |
| FBgn0000497 ds | FBgn0027338 Kap-alpha3 | 0 0 1 0 | 1 |
| FBgn0000497 ds | FBgn0011703 RnrL       | 0 1 0 0 | 1 |
| FBgn0000497 ds | FBgn0039854 CG1635     | 0 0 0 1 | 1 |
| FBgn0000497 ds | FBgn0082831 pps        | 0 1 0 0 | 1 |
| FBgn0000497 ds | FBgn0028407 Drep-3     | 0 0 0 1 | 1 |
| FBgn0000497 ds | FBgn0037746 CG8478     | 0 1 0 0 | 1 |
| FBgn0000497 ds | FBgn0042199 CG13713    | 0 0 1 0 | 1 |
| FBgn0000497 ds | FBgn0028375 heix       | 0 0 1 0 | 1 |
| FBgn0000497 ds | FBgn0003274 RpLP2      | 0 0 0 1 | 1 |
| FBgn0000497 ds | FBgn0050001 CG30001    | 0 0 1 0 | 1 |
| FBgn0000497 ds | FBgn0031057 Ubqn       | 0 0 1 0 | 1 |
| FBgn0000497 ds | FBgn0016081 fry        | 0 0 0 1 | 1 |
| FBgn0000497 ds | FBgn0053926 CG33926    | 0 0 1 0 | 1 |
| FBgn0000497 ds | FBgn0001189 hfw        | 0 0 1 0 | 1 |
| FBgn0000497 ds | FBgn0035753 RpL18      | 0 0 0 1 | 1 |
| FBgn0000497 ds | FBgn0040286 SC35       | 0 0 0 1 | 1 |
| FBgn0000497 ds | FBgn0034265 Snx16      | 0 0 1 0 | 1 |
| FBgn0000497 ds | FBgn0010352 Nc73EF     | 0 0 0 1 | 1 |
| FBgn0000497 ds | FBgn0034089 CG8446     | 0 0 0 1 | 1 |
| FBgn0000497 ds | FBgn0045980 niki       | 0 0 0 1 | 1 |
| FBgn0000497 ds | FBgn0261928 CG42795    | 0 0 0 1 | 1 |
| FBgn0000497 ds | FBgn0025865 Cortactin  | 0 0 1 0 | 1 |
| FBgn0000497 ds | FBgn0031052 CG14215    | 0 0 0 1 | 1 |
| FBgn0000497 ds | FBgn0031590 CG3702     | 0 1 0 0 | 1 |
| FBgn0000497 ds | FBgn0010411 RpS18      | 0 0 1 0 | 1 |
| FBgn0000497 ds | FBgn0011771 Hem        | 0 0 0 1 | 1 |
| FBgn0000497 ds | FBgn0005593 RpL7       | 0 0 1 0 | 1 |
| FBgn0000497 ds | FBgn0003279 RpL4       | 0 1 0 0 | 1 |

## (A) entire PPIN

|                |                               |               |     |
|----------------|-------------------------------|---------------|-----|
| FBgn0000497 ds | FBgn0037025 <b>Spc105R</b>    | 0 0 1 0       | 1   |
| FBgn0000497 ds | FBgn0036117 <b>CG6321</b>     | 0 0 1 0       | 1   |
| FBgn0000497 ds | FBgn0026252 <b>msk</b>        | 0 0 1 0       | 1   |
| FBgn0000497 ds | FBgn0033663 <b>ERp60</b>      | 0 0 1 0       | 1   |
| FBgn0000497 ds | FBgn0028274 <b>ns3</b>        | 0 0 1 0       | 1   |
| FBgn0000497 ds | FBgn0040255 <b>Ugt86De</b>    | 0 0 1 0       | 1   |
| FBgn0000497 ds | FBgn0051760 <b>CG31760</b>    | 0 1 0 0       | 1   |
| FBgn0000497 ds | FBgn0039559 <b>Mes-4</b>      | 0 0 0 1       | 1   |
| FBgn0000497 ds | FBgn0038293 <b>CG6904</b>     | 0 0 1 0       | 1   |
| FBgn0000497 ds | FBgn0261608 <b>RpL37A</b>     | 0 0 0 1       | 1   |
| FBgn0000497 ds | FBgn0261461 <b>RhoGAP18B</b>  | 0 0 0 1       | 1   |
| FBgn0000497 ds | FBgn0028373 <b>inx3</b>       | 0 0 1 0       | 1   |
| FBgn0000497 ds | FBgn0026702 <b>I(1)G0045</b>  | 0 1 0 0       | 1   |
| FBgn0000497 ds | FBgn0004838 <b>Hrb27C</b>     | 0 0 0 1       | 1   |
| FBgn0000497 ds | FBgn0034087 <b>clu</b>        | 0 0 1 0       | 1   |
| FBgn0262029 d  | FBgn0250789 <b>alpha-Spec</b> | 1 55 47 53    | 155 |
| FBgn0262029 d  | FBgn0000253 <b>Cam</b>        | 1 16 11 14    | 41  |
| FBgn0262029 d  | FBgn0034264 <b>CG10933</b>    | 1 7 5 10      | 22  |
| FBgn0262029 d  | FBgn0029903 <b>pod1</b>       | 1 7 5 10      | 22  |
| FBgn0262029 d  | FBgn0086656 <b>shrb</b>       | 0.99 8 6 10   | 24  |
| FBgn0262029 d  | FBgn0046214 <b>vig2</b>       | 0.98 9 8 10   | 27  |
| FBgn0262029 d  | FBgn0003261 <b>Rm62</b>       | 0.97 18 15 19 | 52  |
| FBgn0262029 d  | FBgn0025865 <b>Cortactin</b>  | 0.97 4 4 4    | 12  |
| FBgn0262029 d  | FBgn0002638 <b>Bj1</b>        | 0.96 19 8 23  | 50  |
| FBgn0262029 d  | FBgn0004167 <b>kst</b>        | 0.96 14 12 19 | 45  |
| FBgn0262029 d  | FBgn0032731 <b>CG10641</b>    | 0.96 12 10 10 | 32  |
| FBgn0262029 d  | FBgn0002466 <b>sti</b>        | 0.96 6 5 11   | 22  |
| FBgn0262029 d  | FBgn0086356 <b>tum</b>        | 0.95 8 5 9    | 22  |
| FBgn0262029 d  | FBgn0003231 <b>ref(2)P</b>    | 0.94 4 3 4    | 11  |
| FBgn0262029 d  | FBgn0028734 <b>Fmr1</b>       | 0.93 13 10 11 | 34  |
| FBgn0262029 d  | FBgn0010173 <b>RpA-70</b>     | 0.91 8 12 8   | 28  |
| FBgn0262029 d  | FBgn0030612 <b>CG5599</b>     | 0.91 6 5 4    | 15  |
| FBgn0262029 d  | FBgn0029687 <b>Vap-33-1</b>   | 0.91 4 3 3    | 10  |
| FBgn0262029 d  | FBgn0033663 <b>ERp60</b>      | 0.9 3 4 3     | 10  |
| FBgn0262029 d  | FBgn0005648 <b>Pabp2</b>      | 0.88 3 3 3    | 9   |
| FBgn0262029 d  | FBgn0010774 <b>Aly</b>        | 0.88 3 3 3    | 9   |
| FBgn0262029 d  | FBgn0024987 <b>ssx</b>        | 0.85 9 6 7    | 22  |
| FBgn0262029 d  | FBgn0027616 <b>YT521-B</b>    | 0.81 3 2 4    | 9   |
| FBgn0262029 d  | FBgn0037756 <b>CG8507</b>     | 0.81 3 2 4    | 9   |
| FBgn0262029 d  | FBgn0020279 <b>lig</b>        | 0.79 9 8 12   | 29  |
| FBgn0262029 d  | FBgn0087035 <b>AGO2</b>       | 0.77 15 6 15  | 36  |
| FBgn0262029 d  | FBgn0032906 <b>RPA2</b>       | 0.77 3 2 3    | 8   |
| FBgn0262029 d  | FBgn0010246 <b>Myo61F</b>     | 0.76 8 14 11  | 33  |
| FBgn0262029 d  | FBgn0002780 <b>mod</b>        | 0.75 12 11 11 | 34  |
| FBgn0262029 d  | FBgn0033062 <b>Ars2</b>       | 0.75 12 2 9   | 23  |
| FBgn0262029 d  | FBgn0029979 <b>CG10777</b>    | 0.72 17 10 13 | 40  |
| FBgn0262029 d  | FBgn0035500 <b>ens</b>        | 0.71 2 2 5    | 9   |
| FBgn0262029 d  | FBgn0041188 <b>Atx2</b>       | 0.7 5 3 5     | 13  |
| FBgn0262029 d  | FBgn0039129 <b>RpS19b</b>     | 0.69 3 2 2    | 7   |
| FBgn0262029 d  | FBgn0024183 <b>vig</b>        | 0.67 4 3 3    | 10  |
| FBgn0262029 d  | FBgn0011692 <b>pav</b>        | 0.66 11 8 13  | 32  |

## (A) entire PPIN

|             |          |             |                     |             |         |    |
|-------------|----------|-------------|---------------------|-------------|---------|----|
| FBgn0262029 | <b>d</b> | FBgn0041775 | <b>tral</b>         | <b>0.66</b> | 6 2 5   | 13 |
| FBgn0262029 | <b>d</b> | FBgn0263197 | <b>Patronin</b>     | <b>0.65</b> | 3 1 5   | 9  |
| FBgn0262029 | <b>d</b> | FBgn0261385 | <b>scra</b>         | <b>0.63</b> | 2 4 5   | 11 |
| FBgn0262029 | <b>d</b> | FBgn0005411 | <b>U2af50</b>       | <b>0.62</b> | 3 0 5   | 8  |
| FBgn0262029 | <b>d</b> | FBgn0033205 | <b>CG2064</b>       | <b>0.62</b> | 1 2 4   | 7  |
| FBgn0262029 | <b>d</b> | FBgn0053129 | <b>CG33129</b>      | <b>0.59</b> | 4 1 2   | 7  |
| FBgn0262029 | <b>d</b> | FBgn0011640 | <b>lark</b>         | <b>0.58</b> | 5 1 4   | 10 |
| FBgn0262029 | <b>d</b> | FBgn0263391 | <b>hts</b>          | <b>0.57</b> | 13 9 21 | 43 |
| FBgn0262029 | <b>d</b> | FBgn0030956 | <b>CG18259</b>      | <b>0.57</b> | 2 1 3   | 6  |
| FBgn0262029 | <b>d</b> | FBgn0043884 | <b>mask</b>         | <b>0.56</b> | 2 4 2   | 8  |
| FBgn0262029 | <b>d</b> | FBgn0033912 | <b>RpS23</b>        | <b>0.56</b> | 2 1 2   | 5  |
| FBgn0262029 | <b>d</b> | FBgn0039713 | <b>RpS8</b>         | <b>0.54</b> | 2 3 2   | 7  |
| FBgn0262029 | <b>d</b> | FBgn0052685 | <b>CG32685</b>      | <b>0.54</b> | 1 2 3   | 6  |
| FBgn0262029 | <b>d</b> | FBgn0036740 | <b>CG6259</b>       | <b>0.54</b> | 2 1 2   | 5  |
| FBgn0262029 | <b>d</b> | FBgn0040007 | <b>RpL38</b>        | <b>0.54</b> | 2 1 2   | 5  |
| FBgn0262029 | <b>d</b> | FBgn0022959 | <b>yps</b>          | <b>0.53</b> | 4 1 5   | 10 |
| FBgn0262029 | <b>d</b> | FBgn0262601 | <b>SmB</b>          | <b>0.52</b> | 1 2 2   | 5  |
| FBgn0262029 | <b>d</b> | FBgn0040284 | <b>SF2</b>          | <b>0.51</b> | 2 1 3   | 6  |
| FBgn0262029 | <b>d</b> | FBgn0027084 | <b>Aats-lys</b>     | <b>0.5</b>  | 3 0 3   | 6  |
| FBgn0262029 | <b>d</b> | FBgn0011571 | <b>caz</b>          | <b>0.5</b>  | 2 2 1   | 5  |
| FBgn0262029 | <b>d</b> | FBgn0038369 | <b>Arpc3A</b>       | <b>0.49</b> | 1 2 4   | 7  |
| FBgn0262029 | <b>d</b> | FBgn0016691 | <b>Oscp</b>         | <b>0.49</b> | 2 1 2   | 5  |
| FBgn0262029 | <b>d</b> | FBgn0028479 | <b>CG4389</b>       | <b>0.48</b> | 4 3 1   | 8  |
| FBgn0262029 | <b>d</b> | FBgn0030322 | <b>CG15220</b>      | <b>0.48</b> | 1 1 4   | 6  |
| FBgn0262029 | <b>d</b> | FBgn0010488 | <b>NAT1</b>         | <b>0.44</b> | 3 1 1   | 5  |
| FBgn0262029 | <b>d</b> | FBgn0000181 | <b>bic</b>          | <b>0.42</b> | 13 8 9  | 30 |
| FBgn0262029 | <b>d</b> | FBgn0263106 | <b>DnaJ-1</b>       | <b>0.42</b> | 3 2 6   | 11 |
| FBgn0262029 | <b>d</b> | FBgn0036763 | <b>CG7441</b>       | <b>0.42</b> | 2 2 1   | 5  |
| FBgn0262029 | <b>d</b> | FBgn0261592 | <b>RpS6</b>         | <b>0.42</b> | 1 1 2   | 4  |
| FBgn0262029 | <b>d</b> | FBgn0014163 | <b>fax</b>          | <b>0.41</b> | 2 0 2   | 4  |
| FBgn0262029 | <b>d</b> | FBgn0259139 | <b>glo</b>          | <b>0.41</b> | 2 0 2   | 4  |
| FBgn0262029 | <b>d</b> | FBgn0260944 | <b>Rbp1</b>         | <b>0.4</b>  | 2 1 1   | 4  |
| FBgn0262029 | <b>d</b> | FBgn0259978 | <b>vlc</b>          | <b>0.4</b>  | 2 1 1   | 4  |
| FBgn0262029 | <b>d</b> | FBgn0004401 | <b>Pep</b>          | <b>0.38</b> | 3 0 4   | 7  |
| FBgn0262029 | <b>d</b> | FBgn0263396 | <b>sqd</b>          | <b>0.37</b> | 7 6 11  | 24 |
| FBgn0262029 | <b>d</b> | FBgn0262716 | <b>Arp66B</b>       | <b>0.36</b> | 5 11 6  | 22 |
| FBgn0262029 | <b>d</b> | FBgn0010412 | <b>RpS19a</b>       | <b>0.36</b> | 3 0 1   | 4  |
| FBgn0262029 | <b>d</b> | FBgn0042134 | <b>Capr</b>         | <b>0.33</b> | 9 8 11  | 28 |
| FBgn0262029 | <b>d</b> | FBgn0037137 | <b>Nopp140</b>      | <b>0.33</b> | 3 2 3   | 8  |
| FBgn0262029 | <b>d</b> | FBgn0023167 | <b>SmD3</b>         | <b>0.33</b> | 1 1 2   | 4  |
| FBgn0262029 | <b>d</b> | FBgn0086904 | <b>Nacalpa</b>      | <b>0.32</b> | 8 3 7   | 18 |
| FBgn0262029 | <b>d</b> | FBgn0261014 | <b>TER94</b>        | <b>0.32</b> | 1 1 3   | 5  |
| FBgn0262029 | <b>d</b> | FBgn0051618 | <b>His2A:CG3161</b> | <b>0.32</b> | 1 1 2   | 4  |
| FBgn0262029 | <b>d</b> | FBgn0003517 | <b>sta</b>          | <b>0.32</b> | 2 1 1   | 4  |
| FBgn0262029 | <b>d</b> | FBgn0026372 | <b>RpL23A</b>       | <b>0.32</b> | 2 1 0   | 3  |
| FBgn0262029 | <b>d</b> | FBgn0001197 | <b>His2Av</b>       | <b>0.29</b> | 3 2 2   | 7  |
| FBgn0262029 | <b>d</b> | FBgn0004362 | <b>HmgD</b>         | <b>0.29</b> | 2 0 1   | 3  |
| FBgn0262029 | <b>d</b> | FBgn0263594 | <b>lost</b>         | <b>0.28</b> | 3 1 1   | 5  |
| FBgn0262029 | <b>d</b> | FBgn0263355 | <b>CG31688</b>      | <b>0.27</b> | 1 2 3   | 6  |
| FBgn0262029 | <b>d</b> | FBgn0010434 | <b>cora</b>         | <b>0.27</b> | 3 0 2   | 5  |
| FBgn0262029 | <b>d</b> | FBgn0037669 | <b>CG9740</b>       | <b>0.27</b> | 0 1 2   | 3  |

## (A) entire PPIN

|             |   |             |                     |             |          |    |
|-------------|---|-------------|---------------------|-------------|----------|----|
| FBgn0262029 | d | FBgn0019644 | <b>ATPsyn-b</b>     | <b>0.26</b> | 3 0 0    | 3  |
| FBgn0262029 | d | FBgn0020255 | <b>ran</b>          | <b>0.25</b> | 3 0 2    | 5  |
| FBgn0262029 | d | FBgn0029766 | <b>CG15784</b>      | <b>0.25</b> | 0 1 2    | 3  |
| FBgn0262029 | d | FBgn0015268 | <b>Nap1</b>         | <b>0.24</b> | 3 3 3    | 9  |
| FBgn0262029 | d | FBgn0037874 | <b>Tctp</b>         | <b>0.24</b> | 1 2 0    | 3  |
| FBgn0262029 | d | FBgn0260991 | <b>Incenp</b>       | <b>0.23</b> | 1 0 3    | 4  |
| FBgn0262029 | d | FBgn0082582 | <b>tmod</b>         | <b>0.22</b> | 12 15 14 | 41 |
| FBgn0262029 | d | FBgn0001215 | <b>Hrb98DE</b>      | <b>0.21</b> | 4 4 6    | 14 |
| FBgn0262029 | d | FBgn0250788 | <b>beta-Spec</b>    | <b>0.21</b> | 1 2 0    | 3  |
| FBgn0262029 | d | FBgn0011016 | <b>SsRbeta</b>      | <b>0.2</b>  | 1 1 2    | 4  |
| FBgn0262029 | d | FBgn0004378 | <b>Klp61F</b>       | <b>0.2</b>  | 2 0 0    | 2  |
| FBgn0262029 | d | FBgn0024238 | <b>Fim</b>          | <b>0.19</b> | 2 0 1    | 3  |
| FBgn0262029 | d | FBgn0003449 | <b>snf</b>          | <b>0.18</b> | 2 1 1    | 4  |
| FBgn0262029 | d | FBgn0004227 | <b>nonA</b>         | <b>0.17</b> | 5 3 4    | 12 |
| FBgn0262029 | d | FBgn0038476 | <b>kuk</b>          | <b>0.17</b> | 2 0 0    | 2  |
| FBgn0262029 | d | FBgn0004907 | <b>14-3-3zeta</b>   | <b>0.16</b> | 3 1 2    | 6  |
| FBgn0262029 | d | FBgn0261790 | <b>SmE</b>          | <b>0.16</b> | 1 2 1    | 4  |
| FBgn0262029 | d | FBgn0005533 | <b>RpS17</b>        | <b>0.15</b> | 3 1 1    | 5  |
| FBgn0262029 | d | FBgn0035987 | <b>CG3689</b>       | <b>0.13</b> | 2 1 2    | 5  |
| FBgn0262029 | d | FBgn0261596 | <b>RpS24</b>        | <b>0.13</b> | 2 1 1    | 4  |
| FBgn0262029 | d | FBgn0033109 | <b>coro</b>         | <b>0.13</b> | 2 1 1    | 4  |
| FBgn0262029 | d | FBgn0010225 | <b>Gel</b>          | <b>0.13</b> | 0 1 2    | 3  |
| FBgn0262029 | d | FBgn0027885 | <b>Aac11</b>        | <b>0.13</b> | 0 0 2    | 2  |
| FBgn0262029 | d | FBgn0000258 | <b>Ckl1alpha</b>    | <b>0.12</b> | 6 5 9    | 20 |
| FBgn0262029 | d | FBgn0031868 | <b>Rat1</b>         | <b>0.1</b>  | 1 0 2    | 3  |
| FBgn0262029 | d | FBgn0032363 | <b>CG6509</b>       | <b>0.08</b> | 2 1 1    | 4  |
| FBgn0262029 | d | FBgn0013269 | <b>FK506-bp1</b>    | <b>0.07</b> | 3 2 2    | 7  |
| FBgn0262029 | d | FBgn0010348 | <b>Arf79F</b>       | <b>0.07</b> | 2 1 1    | 4  |
| FBgn0262029 | d | FBgn0013981 | <b>His4r</b>        | <b>0.06</b> | 1 3 3    | 7  |
| FBgn0262029 | d | FBgn0010438 | <b>mtSSB</b>        | <b>0.06</b> | 2 1 1    | 4  |
| FBgn0262029 | d | FBgn0013325 | <b>RpL11</b>        | <b>0.05</b> | 8 5 6    | 19 |
| FBgn0262029 | d | FBgn0011726 | <b>tsr</b>          | <b>0.05</b> | 3 3 3    | 9  |
| FBgn0262029 | d | FBgn0086710 | <b>RpL30</b>        | <b>0.04</b> | 2 1 2    | 5  |
| FBgn0262029 | d | FBgn0004838 | <b>Hrb27C</b>       | <b>0.03</b> | 5 6 6    | 17 |
| FBgn0262029 | d | FBgn0034968 | <b>RpL12</b>        | <b>0.03</b> | 4 2 3    | 9  |
| FBgn0262029 | d | FBgn0035589 | <b>CHMP2B</b>       | <b>0.03</b> | 2 1 3    | 6  |
| FBgn0262029 | d | FBgn0004237 | <b>Hrb87F</b>       | <b>0.02</b> | 7 6 9    | 22 |
| FBgn0262029 | d | FBgn0003022 | <b>Ote</b>          | <b>0.02</b> | 6 4 9    | 19 |
| FBgn0262029 | d | FBgn0025286 | <b>RpL31</b>        | <b>0.02</b> | 3 1 3    | 7  |
| FBgn0262029 | d | FBgn0053868 | <b>His2B:CG3386</b> | <b>0.02</b> | 1 2 1    | 4  |
| FBgn0262029 | d | FBgn0002645 | <b>Map205</b>       | <b>0.01</b> | 13 9 10  | 32 |
| FBgn0262029 | d | FBgn0015834 | <b>Trip1</b>        | <b>0.01</b> | 7 3 4    | 14 |
| FBgn0262029 | d | FBgn0019936 | <b>RpS20</b>        | <b>0.01</b> | 3 3 4    | 10 |
| FBgn0262029 | d | FBgn0031437 | <b>p16-ARC</b>      | <b>0.01</b> | 3 3 3    | 9  |
| FBgn0262029 | d | FBgn0028737 | <b>Ef1beta</b>      | <b>0.01</b> | 1 4 3    | 8  |
| FBgn0262029 | d | FBgn0037719 | <b>bocksbeutel</b>  | <b>0.01</b> | 3 2 3    | 8  |
| FBgn0262029 | d | FBgn0032444 | <b>CG5525</b>       | <b>0.01</b> | 3 2 2    | 7  |
| FBgn0262029 | d | FBgn0001217 | <b>Hsc70-2</b>      | <b>0.01</b> | 2 2 2    | 6  |
| FBgn0262029 | d | FBgn0000173 | <b>ben</b>          | <b>0.01</b> | 2 1 2    | 5  |
| FBgn0262029 | d | FBgn0002781 | <b>mod(mdg4)</b>    | <b>0.01</b> | 0 3 2    | 5  |
| FBgn0262029 | d | FBgn0030136 | <b>RpS28b</b>       | <b>0.01</b> | 2 1 1    | 4  |

## (A) entire PPIN

|             |   |             |             |   |             |     |
|-------------|---|-------------|-------------|---|-------------|-----|
| FBgn0262029 | d | FBgn0005634 | zip         | 0 | 263 266 257 | 786 |
| FBgn0262029 | d | FBgn0000042 | Act5C       | 0 | 60 45 49    | 154 |
| FBgn0262029 | d | FBgn0000709 | filil       | 0 | 36 31 29    | 96  |
| FBgn0262029 | d | FBgn0000556 | Ef1alpha48D | 0 | 31 28 34    | 93  |
| FBgn0262029 | d | FBgn0261710 | nocte       | 0 | 32 22 34    | 88  |
| FBgn0262029 | d | FBgn0001219 | Hsc70-4     | 0 | 26 26 27    | 79  |
| FBgn0262029 | d | FBgn0003721 | Tm1         | 0 | 23 25 24    | 72  |
| FBgn0262029 | d | FBgn0030699 | CG8578      | 0 | 22 17 21    | 60  |
| FBgn0262029 | d | FBgn0263231 | bel         | 0 | 21 16 22    | 59  |
| FBgn0262029 | d | FBgn0003887 | betaTub56D  | 0 | 21 19 18    | 58  |
| FBgn0262029 | d | FBgn0034577 | cpa         | 0 | 18 18 15    | 51  |
| FBgn0262029 | d | FBgn0015778 | rin         | 0 | 18 10 15    | 43  |
| FBgn0262029 | d | FBgn0002525 | Lam         | 0 | 16 12 14    | 42  |
| FBgn0262029 | d | FBgn0003884 | alphaTub84B | 0 | 13 11 17    | 41  |
| FBgn0262029 | d | FBgn0001218 | Hsc70-3     | 0 | 12 12 13    | 37  |
| FBgn0262029 | d | FBgn0040227 | eIF-3p66    | 0 | 12 11 14    | 37  |
| FBgn0262029 | d | FBgn0001233 | Hsp83       | 0 | 13 11 12    | 36  |
| FBgn0262029 | d | FBgn0004687 | Mlc-c       | 0 | 10 13 12    | 35  |
| FBgn0262029 | d | FBgn0011570 | cpb         | 0 | 11 12 10    | 33  |
| FBgn0262029 | d | FBgn0035608 | blanks      | 0 | 12 10 10    | 32  |
| FBgn0262029 | d | FBgn0000044 | Act57B      | 0 | 8 9 12      | 29  |
| FBgn0262029 | d | FBgn0262734 | Rbp2        | 0 | 10 6 11     | 27  |
| FBgn0262029 | d | FBgn0029176 | Ef1gamma    | 0 | 10 7 9      | 26  |
| FBgn0262029 | d | FBgn0003178 | PyK         | 0 | 9 7 8       | 24  |
| FBgn0262029 | d | FBgn0031977 | baf         | 0 | 6 7 9       | 22  |
| FBgn0262029 | d | FBgn0038145 | Droj2       | 0 | 9 4 8       | 21  |
| FBgn0262029 | d | FBgn0261619 | pAbp        | 0 | 9 6 6       | 21  |
| FBgn0262029 | d | FBgn0039757 | RpS7        | 0 | 7 4 9       | 20  |
| FBgn0262029 | d | FBgn0027932 | Akap200     | 0 | 8 5 7       | 20  |
| FBgn0262029 | d | FBgn0001961 | Sop2        | 0 | 7 5 7       | 19  |
| FBgn0262029 | d | FBgn0031256 | CG4164      | 0 | 5 6 7       | 18  |
| FBgn0262029 | d | FBgn0001220 | Hsc70-5     | 0 | 4 6 6       | 16  |
| FBgn0262029 | d | FBgn0000559 | Ef2b        | 0 | 7 5 3       | 15  |
| FBgn0262029 | d | FBgn0032859 | Arc-p34     | 0 | 5 2 8       | 15  |
| FBgn0262029 | d | FBgn0036213 | RpL10Ab     | 0 | 6 3 6       | 15  |
| FBgn0262029 | d | FBgn0001216 | Hsc70-1     | 0 | 4 4 5       | 13  |
| FBgn0262029 | d | FBgn0003732 | Top2        | 0 | 3 4 5       | 12  |
| FBgn0262029 | d | FBgn0027066 | Eb1         | 0 | 5 1 6       | 12  |
| FBgn0262029 | d | FBgn0003514 | sqh         | 0 | 3 4 4       | 11  |
| FBgn0262029 | d | FBgn0034743 | RpS16       | 0 | 3 4 4       | 11  |
| FBgn0262029 | d | FBgn0003360 | sesB        | 0 | 3 3 5       | 11  |
| FBgn0262029 | d | FBgn0004403 | RpS14a      | 0 | 4 2 5       | 11  |
| FBgn0262029 | d | FBgn0010217 | ATPsyn-beta | 0 | 4 2 4       | 10  |
| FBgn0262029 | d | FBgn0011284 | RpS4        | 0 | 4 3 3       | 10  |
| FBgn0262029 | d | FBgn0035499 | Chd64       | 0 | 4 3 3       | 10  |
| FBgn0262029 | d | FBgn0013756 | Mtor        | 0 | 4 1 5       | 10  |
| FBgn0262029 | d | FBgn0015756 | RpL9        | 0 | 4 3 3       | 10  |
| FBgn0262029 | d | FBgn0261593 | RpS10b      | 0 | 3 2 4       | 9   |
| FBgn0262029 | d | FBgn0051363 | Jupiter     | 0 | 3 2 4       | 9   |
| FBgn0262029 | d | FBgn0004363 | porin       | 0 | 4 3 2       | 9   |
| FBgn0262029 | d | FBgn0039697 | CG7834      | 0 | 3 2 3       | 8   |

## (A) entire PPIN

|               |                                  |         |   |
|---------------|----------------------------------|---------|---|
| FBgn0262029 d | FBgn0037891 <b>CG5214</b>        | 0 2 4 2 | 8 |
| FBgn0262029 d | FBgn0010078 <b>RpL23</b>         | 0 2 4 2 | 8 |
| FBgn0262029 d | FBgn0030993 <b>Mec2</b>          | 0 2 3 3 | 8 |
| FBgn0262029 d | FBgn0031781 <b>Arc-p20</b>       | 0 3 2 3 | 8 |
| FBgn0262029 d | FBgn0014269 <b>prod</b>          | 0 3 2 3 | 8 |
| FBgn0262029 d | FBgn0011742 <b>Arp14D</b>        | 0 2 2 3 | 7 |
| FBgn0262029 d | FBgn0010198 <b>RpS15Aa</b>       | 0 4 2 1 | 7 |
| FBgn0262029 d | FBgn0000100 <b>RpLP0</b>         | 0 4 1 2 | 7 |
| FBgn0262029 d | FBgn0028327 <b>I(1)G0320</b>     | 0 1 2 4 | 7 |
| FBgn0262029 d | FBgn0003890 <b>betaTub97EF</b>   | 0 2 2 2 | 6 |
| FBgn0262029 d | FBgn0010408 <b>RpS9</b>          | 0 3 1 2 | 6 |
| FBgn0262029 d | FBgn0011211 <b>blw</b>           | 0 3 2 1 | 6 |
| FBgn0262029 d | FBgn0001942 <b>eIF-4a</b>        | 0 1 3 2 | 6 |
| FBgn0262029 d | FBgn0039300 <b>RpS27</b>         | 0 2 1 1 | 4 |
| FBgn0262029 d | FBgn0003274 <b>RpLP2</b>         | 0 2 1 1 | 4 |
| FBgn0262029 d | FBgn0028969 <b>deltaCOP</b>      | 0 1 1 2 | 4 |
| FBgn0262029 d | FBgn0013750 <b>Arf51F</b>        | 0 1 1 1 | 3 |
| FBgn0262029 d | FBgn0261792 <b>snRNP-U1-C</b>    | 0 1 1 1 | 3 |
| FBgn0262029 d | FBgn0260986 <b>mei-38</b>        | 0 1 1 1 | 3 |
| FBgn0262029 d | FBgn0020238 <b>14-3-3epsilon</b> | 0 1 2 0 | 3 |
| FBgn0262029 d | FBgn0032198 <b>eEF1delta</b>     | 0 1 1 1 | 3 |
| FBgn0262029 d | FBgn0028470 <b>Patr-1</b>        | 0 1 1 1 | 3 |
| FBgn0262029 d | FBgn0039562 <b>Gp93</b>          | 0 1 1 1 | 3 |
| FBgn0262029 d | FBgn0050122 <b>CG30122</b>       | 0 2 0 1 | 3 |
| FBgn0262029 d | FBgn0002593 <b>RpLP1</b>         | 0 1 1 1 | 3 |
| FBgn0262029 d | FBgn0032454 <b>CG5787</b>        | 0 1 1 1 | 3 |
| FBgn0262029 d | FBgn0010333 <b>Rac1</b>          | 0 1 1 1 | 3 |
| FBgn0262029 d | FBgn0029118 <b>Sucb</b>          | 0 1 1 1 | 3 |
| FBgn0262029 d | FBgn0026761 <b>Trap1</b>         | 0 1 1 1 | 3 |
| FBgn0262029 d | FBgn0020910 <b>RpL3</b>          | 0 1 1 1 | 3 |
| FBgn0262029 d | FBgn0033264 <b>Nup50</b>         | 0 1 1 1 | 3 |
| FBgn0262029 d | FBgn0029093 <b>cathD</b>         | 0 1 1 1 | 3 |
| FBgn0262029 d | FBgn0033342 <b>CG8258</b>        | 0 1 1 1 | 3 |
| FBgn0262029 d | FBgn0014391 <b>sun</b>           | 0 1 1 1 | 3 |
| FBgn0262029 d | FBgn0261444 <b>CG3638</b>        | 0 1 1 1 | 3 |
| FBgn0262029 d | FBgn0037670 <b>CG8436</b>        | 0 1 1 1 | 3 |
| FBgn0262029 d | FBgn0016693 <b>Past1</b>         | 0 1 1 1 | 3 |
| FBgn0262029 d | FBgn0260010 <b>rump</b>          | 0 1 1 1 | 3 |
| FBgn0262029 d | FBgn0016120 <b>ATPsyn-d</b>      | 0 1 1 1 | 3 |
| FBgn0262029 d | FBgn0034181 <b>CG8963</b>        | 0 1 1 1 | 3 |
| FBgn0262029 d | FBgn0030943 <b>CG6540</b>        | 0 1 1 1 | 3 |
| FBgn0262029 d | FBgn0025700 <b>CG5885</b>        | 0 1 1 1 | 3 |
| FBgn0262029 d | FBgn0014029 <b>Sep2</b>          | 0 1 1 1 | 3 |
| FBgn0262029 d | FBgn0035588 <b>CG10672</b>       | 0 1 1 1 | 3 |
| FBgn0262029 d | FBgn0011710 <b>Sep1</b>          | 0 1 0 2 | 3 |
| FBgn0262029 d | FBgn0001315 <b>kl-5</b>          | 0 1 1 1 | 3 |
| FBgn0262029 d | FBgn0003941 <b>RpL40</b>         | 0 1 1 1 | 3 |
| FBgn0262029 d | FBgn0002622 <b>RpS3</b>          | 0 1 1 1 | 3 |
| FBgn0262029 d | FBgn0014189 <b>Hel25E</b>        | 0 2 0 0 | 2 |
| FBgn0262029 d | FBgn0034138 <b>RpS15</b>         | 0 1 0 1 | 2 |
| FBgn0262029 d | FBgn0030992 <b>CG33253</b>       | 0 1 1 0 | 2 |

## (A) entire PPIN

|               |                               |         |   |
|---------------|-------------------------------|---------|---|
| FBgn0262029 d | FBgn0037632 <b>Tcp-1eta</b>   | 0 1 0 1 | 2 |
| FBgn0262029 d | FBgn0010612 <b>I(2)06225</b>  | 0 1 0 1 | 2 |
| FBgn0262029 d | FBgn0010265 <b>RpS13</b>      | 0 1 1 0 | 2 |
| FBgn0262029 d | FBgn0036805 <b>Chmp1</b>      | 0 0 1 1 | 2 |
| FBgn0262029 d | FBgn0030086 <b>CG7033</b>     | 0 1 0 1 | 2 |
| FBgn0262029 d | FBgn0261397 <b>didum</b>      | 0 0 0 2 | 2 |
| FBgn0262029 d | FBgn0005586 <b>Rab3</b>       | 0 1 0 1 | 2 |
| FBgn0262029 d | FBgn0027494 <b>RpS10a</b>     | 0 1 0 1 | 2 |
| FBgn0262029 d | FBgn0038965 <b>mats</b>       | 0 1 1 0 | 2 |
| FBgn0262029 d | FBgn0003888 <b>betaTub60D</b> | 0 1 0 1 | 2 |
| FBgn0262029 d | FBgn0260441 <b>RpS12</b>      | 0 1 1 0 | 2 |
| FBgn0262029 d | FBgn0034967 <b>eIF-5A</b>     | 0 1 0 1 | 2 |
| FBgn0262029 d | FBgn0036641 <b>Smn</b>        | 0 1 1 0 | 2 |
| FBgn0262029 d | FBgn0025637 <b>skpA</b>       | 0 1 0 1 | 2 |
| FBgn0262029 d | FBgn0027598 <b>cindr</b>      | 0 1 1 0 | 2 |
| FBgn0262029 d | FBgn0022984 <b>qkr58E-3</b>   | 0 1 0 1 | 2 |
| FBgn0262029 d | FBgn0039229 <b>Saf-B</b>      | 0 0 1 1 | 2 |
| FBgn0262029 d | FBgn0023521 <b>CG3587</b>     | 0 0 1 1 | 2 |
| FBgn0262029 d | FBgn0031066 <b>CG14235</b>    | 0 1 0 1 | 2 |
| FBgn0262029 d | FBgn0017545 <b>RpS3A</b>      | 0 1 0 1 | 2 |
| FBgn0262029 d | FBgn0010808 <b>I(3)03670</b>  | 0 1 0 1 | 2 |
| FBgn0262029 d | FBgn0028697 <b>RpL15</b>      | 0 1 1 0 | 2 |
| FBgn0262029 d | FBgn0022349 <b>CG1910</b>     | 0 1 0 1 | 2 |
| FBgn0262029 d | FBgn0011823 <b>Pen</b>        | 0 1 1 0 | 2 |
| FBgn0262029 d | FBgn0032833 <b>CG10664</b>    | 0 1 1 0 | 2 |
| FBgn0262029 d | FBgn0033879 <b>CG6543</b>     | 0 1 0 1 | 2 |
| FBgn0262029 d | FBgn0250814 <b>CG4169</b>     | 0 1 0 1 | 2 |
| FBgn0262029 d | FBgn0037549 <b>CG7878</b>     | 0 1 0 1 | 2 |
| FBgn0262029 d | FBgn0039402 <b>vps2</b>       | 0 0 1 1 | 2 |
| FBgn0262029 d | FBgn0035872 <b>CG7185</b>     | 0 1 0 1 | 2 |
| FBgn0262029 d | FBgn0035424 <b>CG11505</b>    | 0 1 0 1 | 2 |
| FBgn0262029 d | FBgn0035600 <b>CG4769</b>     | 0 1 0 1 | 2 |
| FBgn0262029 d | FBgn0261609 <b>eIF-2alpha</b> | 0 1 0 1 | 2 |
| FBgn0262029 d | FBgn0027329 <b>Tcp-1zeta</b>  | 0 1 1 0 | 2 |
| FBgn0262029 d | FBgn0004587 <b>B52</b>        | 0 1 0 1 | 2 |
| FBgn0262029 d | FBgn0015324 <b>Vha26</b>      | 0 1 0 1 | 2 |
| FBgn0262029 d | FBgn0062442 <b>CG1458</b>     | 0 1 1 0 | 2 |
| FBgn0262029 d | FBgn0015797 <b>Rab6</b>       | 0 1 0 1 | 2 |
| FBgn0262029 d | FBgn0011638 <b>La</b>         | 0 1 1 0 | 2 |
| FBgn0262029 d | FBgn0004867 <b>RpS2</b>       | 0 0 1 1 | 2 |
| FBgn0262029 d | FBgn0000319 <b>Chc</b>        | 0 1 1 0 | 2 |
| FBgn0262029 d | FBgn0010411 <b>RpS18</b>      | 0 1 0 1 | 2 |
| FBgn0262029 d | FBgn0064225 <b>RpL5</b>       | 0 1 1 0 | 2 |
| FBgn0262029 d | FBgn0034237 <b>eIF3-S9</b>    | 0 1 0 1 | 2 |
| FBgn0262029 d | FBgn0000317 <b>ck</b>         | 0 0 1 1 | 2 |
| FBgn0262029 d | FBgn0033194 <b>Vps13</b>      | 0 1 0 0 | 1 |
| FBgn0262029 d | FBgn0261933 <b>SmD1</b>       | 0 0 0 1 | 1 |
| FBgn0262029 d | FBgn0053225 <b>CG33225</b>    | 0 0 0 1 | 1 |
| FBgn0262029 d | FBgn0021906 <b>RFeSP</b>      | 0 0 1 0 | 1 |
| FBgn0262029 d | FBgn0032587 <b>CG5953</b>     | 0 1 0 0 | 1 |
| FBgn0262029 d | FBgn0015589 <b>Apc</b>        | 0 0 0 1 | 1 |



## (A) entire PPIN

|             |   |             |            |   |       |   |
|-------------|---|-------------|------------|---|-------|---|
| FBgn0262029 | d | FBgn0039286 | dan        | 0 | 0 0 1 | 1 |
| FBgn0262029 | d | FBgn0029823 | CG3011     | 0 | 1 0 0 | 1 |
| FBgn0262029 | d | FBgn0032359 | Osi21      | 0 | 0 0 1 | 1 |
| FBgn0262029 | d | FBgn0039359 | RpL27      | 0 | 1 0 0 | 1 |
| FBgn0262029 | d | FBgn0024734 | PRL-1      | 0 | 0 0 1 | 1 |
| FBgn0262029 | d | FBgn0000412 | D1         | 0 | 0 1 0 | 1 |
| FBgn0262029 | d | FBgn0031021 | CG12203    | 0 | 0 0 1 | 1 |
| FBgn0262029 | d | FBgn0034970 | yki        | 0 | 0 1 0 | 1 |
| FBgn0262029 | d | FBgn0035715 | CG10103    | 0 | 0 0 1 | 1 |
| FBgn0262029 | d | FBgn0016700 | Rab1       | 0 | 1 0 0 | 1 |
| FBgn0262029 | d | FBgn0050278 | CG30278    | 0 | 0 1 0 | 1 |
| FBgn0262029 | d | FBgn0003345 | sd         | 0 | 0 1 0 | 1 |
| FBgn0262029 | d | FBgn0086768 | Pcmt       | 0 | 0 0 1 | 1 |
| FBgn0262029 | d | FBgn0030293 | CG1737     | 0 | 0 0 1 | 1 |
| FBgn0262029 | d | FBgn0085335 | CG34306    | 0 | 0 0 1 | 1 |
| FBgn0262029 | d | FBgn0262735 | Imp        | 0 | 0 1 0 | 1 |
| FBgn0262029 | d | FBgn0001075 | ft         | 0 | 0 1 0 | 1 |
| FBgn0262029 | d | FBgn0029977 | hdm        | 0 | 0 1 0 | 1 |
| FBgn0262029 | d | FBgn0039687 | CG7593     | 0 | 0 1 0 | 1 |
| FBgn0262029 | d | FBgn0001091 | Gapdh1     | 0 | 0 1 0 | 1 |
| FBgn0262029 | d | FBgn0260462 | CG12163    | 0 | 0 0 1 | 1 |
| FBgn0262029 | d | FBgn0263121 | Prosalpha1 | 0 | 0 0 1 | 1 |
| FBgn0262029 | d | FBgn0063485 | Lasp       | 0 | 0 0 1 | 1 |
| FBgn0262029 | d | FBgn0030692 | mRpS30     | 0 | 1 0 0 | 1 |
| FBgn0262029 | d | FBgn0051453 | pch2       | 0 | 1 0 0 | 1 |
| FBgn0262029 | d | FBgn0011787 | mRpL12     | 0 | 1 0 0 | 1 |
| FBgn0262029 | d | FBgn0036333 | MICAL-like | 0 | 0 1 0 | 1 |
| FBgn0262029 | d | FBgn0034259 | CG6459     | 0 | 1 0 0 | 1 |
| FBgn0262029 | d | FBgn0003676 | T-cp1      | 0 | 1 0 0 | 1 |
| FBgn0262029 | d | FBgn0086377 | Syx7       | 0 | 1 0 0 | 1 |
| FBgn0262029 | d | FBgn0033159 | Dscam      | 0 | 0 1 0 | 1 |
| FBgn0262029 | d | FBgn0037046 | CG10581    | 0 | 0 1 0 | 1 |
| FBgn0262029 | d | FBgn0034300 | CG5098     | 0 | 0 0 1 | 1 |
| FBgn0262029 | d | FBgn0040371 | CG12470    | 0 | 0 1 0 | 1 |
| FBgn0262029 | d | FBgn0086532 | Spt-I      | 0 | 0 1 0 | 1 |
| FBgn0262029 | d | FBgn0029975 | CG1444     | 0 | 1 0 0 | 1 |
| FBgn0262029 | d | FBgn0040529 | CG9603     | 0 | 1 0 0 | 1 |
| FBgn0262029 | d | FBgn0038702 | CG3739     | 0 | 1 0 0 | 1 |
| FBgn0262029 | d | FBgn0036406 | CG13484    | 0 | 0 0 1 | 1 |
| FBgn0262029 | d | FBgn0031357 | mRpL48     | 0 | 0 0 1 | 1 |
| FBgn0262029 | d | FBgn0023517 | Pgam5      | 0 | 0 0 1 | 1 |
| FBgn0262029 | d | FBgn0263347 | Caf1       | 0 | 1 0 0 | 1 |
| FBgn0262029 | d | FBgn0262125 | sec23      | 0 | 0 0 1 | 1 |
| FBgn0262029 | d | FBgn0030263 | CG2076     | 0 | 1 0 0 | 1 |
| FBgn0262029 | d | FBgn0000212 | brm        | 0 | 1 0 0 | 1 |
| FBgn0262029 | d | FBgn0038805 | TFAM       | 0 | 0 1 0 | 1 |
| FBgn0262029 | d | FBgn0033087 | CG3194     | 0 | 0 0 1 | 1 |
| FBgn0262029 | d | FBgn0037634 | CG8359     | 0 | 0 0 1 | 1 |
| FBgn0262029 | d | FBgn0040078 | pont       | 0 | 0 0 1 | 1 |
| FBgn0262029 | d | FBgn0038206 | twf        | 0 | 1 0 0 | 1 |
| FBgn0262029 | d | FBgn0028988 | Spn1       | 0 | 0 0 1 | 1 |

## (A) entire PPIN

|             |          |             |                    |         |   |
|-------------|----------|-------------|--------------------|---------|---|
| FBgn0262029 | <b>d</b> | FBgn0010339 | <b>128up</b>       | 0 0 0 1 | 1 |
| FBgn0262029 | <b>d</b> | FBgn0014133 | <b>bif</b>         | 0 0 0 1 | 1 |
| FBgn0262029 | <b>d</b> | FBgn0035577 | <b>CG13708</b>     | 0 0 0 1 | 1 |
| FBgn0262029 | <b>d</b> | FBgn0262559 | <b>Mdh2</b>        | 0 1 0 0 | 1 |
| FBgn0262029 | <b>d</b> | FBgn0053207 | <b>pxb</b>         | 0 0 1 0 | 1 |
| FBgn0262029 | <b>d</b> | FBgn0020510 | <b>Abi</b>         | 0 1 0 0 | 1 |
| FBgn0262029 | <b>d</b> | FBgn0262579 | <b>Ect4</b>        | 0 1 0 0 | 1 |
| FBgn0262029 | <b>d</b> | FBgn0036083 | <b>Ir67b</b>       | 0 1 0 0 | 1 |
| FBgn0262029 | <b>d</b> | FBgn0003716 | <b>tkv</b>         | 0 0 1 0 | 1 |
| FBgn0262029 | <b>d</b> | FBgn0037583 | <b>CG9684</b>      | 0 0 1 0 | 1 |
| FBgn0262029 | <b>d</b> | FBgn0039537 | <b>CG5590</b>      | 0 1 0 0 | 1 |
| FBgn0262029 | <b>d</b> | FBgn0029874 | <b>CG3342</b>      | 0 0 0 1 | 1 |
| FBgn0262029 | <b>d</b> | FBgn0035272 | <b>mRpL46</b>      | 0 1 0 0 | 1 |
| FBgn0262029 | <b>d</b> | FBgn0000579 | <b>Eno</b>         | 0 0 0 1 | 1 |
| FBgn0262029 | <b>d</b> | FBgn0037087 | <b>CG7519</b>      | 0 0 0 1 | 1 |
| FBgn0262029 | <b>d</b> | FBgn0053523 | <b>CG33523</b>     | 0 0 0 1 | 1 |
| FBgn0262029 | <b>d</b> | FBgn0035229 | <b>CG7852</b>      | 0 1 0 0 | 1 |
| FBgn0262029 | <b>d</b> | FBgn0032600 | <b>CG17912</b>     | 0 0 0 1 | 1 |
| FBgn0262029 | <b>d</b> | FBgn0032987 | <b>RpL21</b>       | 0 1 0 0 | 1 |
| FBgn0262029 | <b>d</b> | FBgn0051352 | <b>Unc-115a</b>    | 0 0 0 1 | 1 |
| FBgn0262029 | <b>d</b> | FBgn0085188 | <b>CG34159</b>     | 0 1 0 0 | 1 |
| FBgn0262029 | <b>d</b> | FBgn0083962 | <b>CG34126</b>     | 0 0 0 1 | 1 |
| FBgn0262029 | <b>d</b> | FBgn0032234 | <b>gny</b>         | 0 0 0 1 | 1 |
| FBgn0262029 | <b>d</b> | FBgn0038853 | <b>RhoGAP93B</b>   | 0 0 0 1 | 1 |
| FBgn0262029 | <b>d</b> | FBgn0033403 | <b>CG13739</b>     | 0 0 1 0 | 1 |
| FBgn0262029 | <b>d</b> | FBgn0004406 | <b>tam</b>         | 0 0 0 1 | 1 |
| FBgn0262029 | <b>d</b> | FBgn0003870 | <b>ttk</b>         | 0 0 0 1 | 1 |
| FBgn0262029 | <b>d</b> | FBgn0032216 | <b>CG5384</b>      | 0 0 1 0 | 1 |
| FBgn0262029 | <b>d</b> | FBgn0001104 | <b>G-ialpha65A</b> | 0 0 1 0 | 1 |
| FBgn0262029 | <b>d</b> | FBgn0032518 | <b>RpL24</b>       | 0 0 1 0 | 1 |
| FBgn0262029 | <b>d</b> | FBgn0010909 | <b>msn</b>         | 0 1 0 0 | 1 |
| FBgn0262029 | <b>d</b> | FBgn0032168 | <b>CG13126</b>     | 0 1 0 0 | 1 |
| FBgn0262029 | <b>d</b> | FBgn0033740 | <b>dgt5</b>        | 0 0 0 1 | 1 |
| FBgn0262029 | <b>d</b> | FBgn0020261 | <b>pcm</b>         | 0 0 0 1 | 1 |
| FBgn0262029 | <b>d</b> | FBgn0039000 | <b>CG6954</b>      | 0 0 1 0 | 1 |
| FBgn0262029 | <b>d</b> | FBgn0037135 | <b>CG7414</b>      | 0 1 0 0 | 1 |
| FBgn0262029 | <b>d</b> | FBgn0000658 | <b>fj</b>          | 0 1 0 0 | 1 |
| FBgn0262029 | <b>d</b> | FBgn0052103 | <b>CG32103</b>     | 0 1 0 0 | 1 |
| FBgn0262029 | <b>d</b> | FBgn0015907 | <b>bl</b>          | 0 1 0 0 | 1 |
| FBgn0262029 | <b>d</b> | FBgn0001226 | <b>Hsp27</b>       | 0 0 1 0 | 1 |
| FBgn0262029 | <b>d</b> | FBgn0038860 | <b>CG10825</b>     | 0 0 0 1 | 1 |
| FBgn0262029 | <b>d</b> | FBgn0085370 | <b>Pde11</b>       | 0 1 0 0 | 1 |
| FBgn0262029 | <b>d</b> | FBgn0027338 | <b>Kap-alpha3</b>  | 0 0 0 1 | 1 |
| FBgn0262029 | <b>d</b> | FBgn0037643 | <b>skap</b>        | 0 0 0 1 | 1 |
| FBgn0262029 | <b>d</b> | FBgn0011703 | <b>RnrL</b>        | 0 1 0 0 | 1 |
| FBgn0262029 | <b>d</b> | FBgn0030594 | <b>CG9509</b>      | 0 0 0 1 | 1 |
| FBgn0262029 | <b>d</b> | FBgn0029897 | <b>RpL17</b>       | 0 0 0 1 | 1 |
| FBgn0262029 | <b>d</b> | FBgn0004888 | <b>Scsalpha</b>    | 0 0 0 1 | 1 |
| FBgn0262029 | <b>d</b> | FBgn0002787 | <b>Mov34</b>       | 0 1 0 0 | 1 |
| FBgn0262029 | <b>d</b> | FBgn0004380 | <b>Klp64D</b>      | 0 0 1 0 | 1 |
| FBgn0262029 | <b>d</b> | FBgn0036389 | <b>ssp2</b>        | 0 1 0 0 | 1 |

(A) entire PPIN

|             |   |             |                  |   |       |   |
|-------------|---|-------------|------------------|---|-------|---|
| FBgn0262029 | d | FBgn0011739 | <b>wts</b>       | 0 | 0 1 0 | 1 |
| FBgn0262029 | d | FBgn0013726 | <b>pnut</b>      | 0 | 1 0 0 | 1 |
| FBgn0262029 | d | FBgn0261597 | <b>RpS26</b>     | 0 | 0 1 0 | 1 |
| FBgn0262029 | d | FBgn0030970 | <b>CG7326</b>    | 0 | 1 0 0 | 1 |
| FBgn0262029 | d | FBgn0030479 | <b>Rbp1-like</b> | 0 | 1 0 0 | 1 |
| FBgn0262029 | d | FBgn0045980 | <b>niki</b>      | 0 | 0 1 0 | 1 |
| FBgn0262029 | d | FBgn0261928 | <b>CG42795</b>   | 0 | 0 0 1 | 1 |
| FBgn0262029 | d | FBgn0025936 | <b>Eph</b>       | 0 | 0 1 0 | 1 |
| FBgn0262029 | d | FBgn0015218 | <b>eIF-4E</b>    | 0 | 0 0 1 | 1 |
| FBgn0262029 | d | FBgn0035490 | <b>CG1136</b>    | 0 | 0 1 0 | 1 |
| FBgn0262029 | d | FBgn0032683 | <b>kon</b>       | 0 | 0 0 1 | 1 |
| FBgn0262029 | d | FBgn0013469 | <b>klu</b>       | 0 | 1 0 0 | 1 |
| FBgn0262029 | d | FBgn0037743 | <b>CG8412</b>    | 0 | 0 0 1 | 1 |
| FBgn0262029 | d | FBgn0051926 | <b>CG31926</b>   | 0 | 1 0 0 | 1 |
| FBgn0262029 | d | FBgn0032961 | <b>CG1416</b>    | 0 | 1 0 0 | 1 |
| FBgn0262029 | d | FBgn0000497 | <b>ds</b>        | 0 | 0 1 0 | 1 |
| FBgn0262029 | d | FBgn0261608 | <b>RpL37A</b>    | 0 | 1 0 0 | 1 |
| FBgn0262029 | d | FBgn0034398 | <b>CG15098</b>   | 0 | 0 1 0 | 1 |
| FBgn0262029 | d | FBgn0034827 | <b>Klp59D</b>    | 0 | 1 0 0 | 1 |
| FBgn0262029 | d | FBgn0000140 | <b>asp</b>       | 0 | 1 0 0 | 1 |
| FBgn0262029 | d | FBgn0036822 | <b>CG11637</b>   | 0 | 0 0 1 | 1 |
| FBgn0262029 | d | FBgn0022987 | <b>qkr54B</b>    | 0 | 0 0 1 | 1 |

(A) entire PPIN

Spectral Counts in Control

```

0|0|0|0|0|0|0|0|0|0|0|0|0|0|0|0
1|0|0|0|0|0|0|1|1|1|0|0|0|0|0
0|0|0|0|0|0|0|0|0|0|0|0|0|0|0
0|0|0|0|0|0|0|0|0|1|0|0|1|0|0
0|0|0|0|0|0|0|0|0|0|0|0|0|0|0
0|0|0|0|0|0|0|0|0|0|0|0|0|0|0
0|0|1|0|0|0|1|0|1|2|0|0|0|1|0|0
0|0|0|0|0|0|0|0|0|0|0|0|0|0|0
0|0|0|0|0|0|0|0|0|0|0|0|0|0|0
0|0|0|0|0|0|0|0|0|0|0|0|0|0|0
0|0|0|0|0|0|0|0|0|0|0|0|0|0|0
0|0|0|0|0|0|0|0|0|0|0|0|0|0|0
0|0|0|0|0|0|0|0|0|0|0|0|0|0|0
0|0|0|0|0|0|0|0|0|0|0|0|0|0|0
0|0|0|0|0|0|0|0|0|0|0|0|0|0|0
0|0|0|0|0|0|0|0|0|0|0|0|0|0|0
0|0|0|0|0|0|0|0|0|0|0|0|0|0|0
0|0|0|0|0|0|0|0|0|0|0|0|0|0|0
10|9|9|6|2|13|16|10|15|20|36|36|17|15
0|0|3|5|2|0|0|0|1|3|0|0|0|0|0|0
0|0|0|0|0|0|0|0|0|0|0|0|0|0|0|0
0|0|0|0|0|0|0|0|0|0|0|0|0|0|2|1
0|0|0|0|0|0|0|0|0|0|0|0|0|0|0|0
0|0|2|1|0|0|0|1|1|1|0|0|0|0|0|0
0|0|0|0|0|0|0|0|0|0|0|0|0|0|0|0
0|0|0|0|0|0|0|0|0|0|0|0|0|0|0|0
0|0|0|0|0|0|0|0|0|0|0|0|0|0|0|0
0|0|1|1|0|0|0|0|0|0|0|0|0|0|0|0
0|0|0|0|0|0|0|0|0|0|0|0|0|0|0|0
0|0|0|0|0|0|0|0|0|0|0|0|0|0|0|0
0|0|1|0|0|0|0|0|0|0|0|0|0|0|0|0
0|0|1|0|0|0|0|0|0|0|0|0|0|1|1|0|0
0|0|1|0|0|0|0|0|0|2|0|0|0|0|0|0
0|0|0|0|0|0|0|0|0|0|0|0|0|0|0|0
0|0|0|0|0|0|0|0|0|0|0|0|0|0|0|0
0|0|0|0|0|0|0|0|0|0|0|0|0|0|0|0
0|0|1|0|0|0|0|0|0|0|0|0|0|0|0|0
0|0|0|0|0|0|0|0|0|0|0|0|0|0|0|0
0|0|0|0|0|0|0|0|0|0|0|0|0|0|0|0
0|0|0|0|0|0|0|0|0|0|0|0|0|0|0|0
0|0|1|1|0|0|0|0|0|0|0|0|0|0|0|0
0|0|0|0|0|0|0|0|2|5|0|0|0|0|0|0
0|0|1|2|1|0|0|0|0|0|0|0|0|0|0|0
0|0|0|0|0|0|0|0|0|0|0|0|0|0|0|0
0|0|0|0|0|0|0|0|0|0|0|0|0|0|0|0
0|0|1|0|0|0|0|0|0|0|0|0|0|0|0|0
0|0|0|0|0|0|0|0|2|2|0|0|0|0|0|0

```



(A) entire PPIN

1|0|4|1|2|2|1|1|3|3|0|0|4|3  
3|3|8|6|6|3|3|5|8|8|4|6|7|8  
0|1|2|1|0|0|8|8|4|5|1|3|3|4  
3|3|0|0|0|1|1|1|2|3|1|2|1|1  
8|1|0|7|3|1|9|11|8|19|16|7|5|6|8  
0|0|3|0|0|0|3|1|2|1|3|1|1|1  
1|0|1|2|1|1|0|0|3|3|2|2|1|1  
0|0|1|0|0|1|2|2|4|3|2|3|3|3  
2|1|3|1|1|1|1|0|3|5|0|0|5|2  
2|1|6|4|1|3|4|4|4|10|2|2|3|7  
0|0|5|6|1|0|0|0|2|2|0|0|0|0  
2|1|5|6|2|2|0|0|5|4|1|1|2|1  
1|0|0|0|0|0|5|2|3|1|2|1|4|1  
0|0|1|1|0|0|2|2|2|2|3|3|4|6  
0|0|0|0|0|0|4|3|2|3|2|2|1|1  
0|0|0|0|0|0|0|0|6|8|0|0|0|1  
0|0|1|1|0|0|2|0|1|3|2|1|0|0  
0|0|0|0|0|0|0|0|0|0|0|0|0  
0|0|0|0|0|0|0|0|0|0|0|0|0  
2|2|4|2|1|1|0|0|6|5|2|3|5|5  
1|1|1|1|0|2|4|3|3|4|1|2|4|4  
2|2|0|0|0|0|3|1|4|3|1|2|5|2  
1|1|3|5|2|0|9|4|7|10|3|2|4|3  
10|11|13|15|7|11|6|9|23|23|14|11|1|0  
0|0|0|0|0|0|0|0|0|0|0|0|0|0  
0|0|0|0|0|0|0|0|0|0|0|0|0|0  
1|0|0|1|0|0|2|0|2|1|0|1|1|0  
1|1|2|1|1|1|10|9|4|7|2|3|11|9  
0|0|0|0|0|0|0|0|0|0|0|0|0|0  
0|0|0|0|0|0|0|0|0|0|0|0|0|0  
0|0|0|0|0|0|5|5|4|6|0|0|5|3  
0|0|0|0|0|0|0|0|0|0|0|0|0|0  
0|0|0|0|0|0|0|0|0|0|0|0|0|0  
1|0|2|0|0|2|1|4|5|4|3|1|7|3  
0|0|0|0|0|0|0|0|0|0|0|0|0|0  
0|1|1|1|1|1|0|0|1|1|0|1|0|1  
0|0|0|0|0|0|0|0|0|0|0|0|0|0  
0|0|0|0|0|0|2|1|2|3|0|0|1|0  
0|0|3|1|0|0|0|0|0|1|0|0|0|0  
0|0|0|0|0|0|0|0|0|0|0|0|0|0  
0|0|0|0|0|0|0|0|1|0|2|0|0|0  
0|0|0|0|0|0|2|1|1|0|0|0|1|1  
1|3|7|5|3|2|3|6|8|7|5|5|0|1  
0|0|0|0|0|0|0|0|0|0|0|0|0|0  
5|1|6|10|7|2|0|0|1|3|0|0|6|5  
0|0|9|8|3|1|1|0|1|1|0|0|5|9  
0|0|0|0|0|0|0|0|0|0|0|0|0|0  
0|0|0|0|0|0|0|0|0|0|0|0|0|0  
0|0|0|0|0|0|0|0|0|0|0|0|0|0  
0|0|1|0|0|1|0|0|1|1|1|1|1|1  
0|0|0|0|0|0|5|6|16|19|0|0|12|23



(A) entire PPIN

0|0|1|1|0|0|9|5|1|2|0|1|4|4  
0|0|0|0|0|0|2|2|1|2|0|0|1|1  
0|0|0|0|0|0|0|0|0|0|0|0|0|0  
1|0|0|0|0|0|0|0|1|1|0|0|0|0  
0|0|0|0|0|0|0|0|0|0|0|0|0|0  
0|0|0|0|0|0|0|0|0|0|0|0|0|0  
0|0|0|0|0|0|1|0|0|0|0|0|0|0  
0|0|0|0|0|0|0|0|0|0|0|0|0|0  
0|0|0|0|0|0|0|0|1|1|0|0|0|0  
0|0|0|0|0|0|0|0|0|0|0|0|0|0  
0|0|1|0|0|0|0|0|0|0|0|0|0|0  
0|0|0|0|0|0|0|0|0|0|0|0|0|0  
0|0|0|0|0|0|0|0|0|0|0|0|0|0  
0|0|0|0|0|0|1|1|1|4|2|2|3|2  
0|0|0|0|0|0|0|0|0|0|0|0|0|0  
0|0|0|0|0|0|0|0|0|0|0|0|0|0  
0|1|0|0|0|0|0|0|1|1|1|0|0|0  
0|0|0|0|0|0|0|0|0|0|0|0|0|0  
2|0|4|4|2|1|1|0|3|3|2|1|1|1  
0|0|0|0|0|0|0|0|0|0|0|0|0|0  
0|0|3|4|0|0|0|0|2|2|0|0|4|2  
0|0|0|0|0|0|0|0|0|0|0|0|0|0  
0|0|0|0|0|0|0|0|0|0|0|0|0|0  
0|0|0|0|0|0|0|0|2|2|0|0|0|0  
0|0|0|0|0|0|0|0|0|0|0|1|0|0  
3|1|0|0|0|2|1|0|3|4|0|0|4|4  
0|1|0|0|0|0|1|1|2|2|0|0|2|1  
1|0|0|0|0|0|0|0|0|1|0|0|0|0  
0|0|0|0|0|0|0|0|0|0|0|0|0|0  
0|0|0|0|0|0|0|0|0|0|0|0|0|0  
0|0|0|0|0|0|0|0|0|0|0|0|0|0  
0|0|0|0|0|0|0|0|0|0|0|0|0|0  
0|0|0|0|0|0|0|0|0|0|0|0|0|0  
0|0|0|0|0|0|0|0|0|0|0|0|0|0  
0|0|0|0|0|0|2|1|2|2|0|0|0|1  
0|0|0|0|0|0|0|0|1|0|0|0|0|0  
0|0|0|0|0|0|0|0|0|0|0|0|0|0  
0|0|0|0|0|0|0|0|0|0|0|0|0|0  
0|0|0|0|0|0|0|0|3|3|0|0|0|0  
0|0|0|0|0|0|0|0|0|0|0|0|0|0  
2|3|1|0|0|4|0|0|5|4|3|3|1|1  
0|0|7|3|0|1|0|0|6|13|0|0|0|0  
0|0|0|0|0|0|0|0|0|0|0|0|0|0  
0|0|0|0|0|0|0|0|6|8|0|0|0|1  
0|0|0|0|0|0|0|0|0|0|0|0|0|0  
0|0|0|0|0|0|0|0|2|2|0|0|0|0  
0|0|0|0|0|0|1|0|0|2|0|0|1|0  
0|0|0|0|0|0|0|1|1|1|0|0|0|0  
0|0|0|0|0|0|0|0|1|4|1|0|2|0  
0|0|0|0|0|0|1|0|0|0|0|0|1|0



(A) entire PPIN

0|0|0|0|0|2|0|4|3|0|0|0|1  
0|0|0|0|0|2|1|1|1|0|0|1|0  
0|0|0|0|0|0|1|1|1|0|0|0|1  
0|0|0|0|0|0|0|0|0|1|0|0|0  
0|0|1|0|0|0|4|1|2|6|1|1|1|1  
0|0|1|0|0|0|0|0|3|3|1|0|0|0  
6|6|2|0|0|3|0|7|4|3|0|0|0|0  
0|0|0|0|0|0|0|1|1|0|0|0|0  
0|0|0|0|0|0|0|0|0|0|0|0|0|0  
0|0|0|0|0|0|0|1|1|0|0|4|4  
2|1|1|0|0|1|5|5|5|6|0|0|0|0  
0|0|0|0|0|0|0|0|0|1|0|0|0|1  
0|0|0|0|0|0|1|0|0|0|0|0|0|1  
0|0|0|0|0|0|5|5|4|6|0|0|5|3  
0|0|0|0|0|0|0|1|1|1|0|0|1|1  
0|0|0|0|0|0|0|0|1|1|0|0|0|0  
0|0|0|0|0|0|1|1|2|3|0|0|1|1  
0|0|0|0|0|0|0|0|2|1|0|0|0|0  
0|0|2|2|1|1|6|3|2|2|1|1|1|1  
0|0|0|0|0|0|0|0|1|1|0|0|0|1  
1|0|4|3|0|0|0|1|3|3|0|0|0|0  
0|0|0|0|0|0|3|4|0|0|1|0|0|0  
0|0|0|0|0|0|0|0|0|0|0|0|0|0  
0|0|0|0|0|0|0|0|2|5|0|0|0|0  
0|0|0|0|0|0|3|2|0|1|0|0|0|0  
0|0|0|0|0|0|0|0|0|0|0|0|0|0  
0|0|0|0|0|0|0|0|1|2|0|0|0|0  
0|0|1|0|0|0|0|0|1|1|0|1|0|0  
0|0|1|1|0|0|0|0|0|0|0|1|3|3  
0|0|0|0|0|0|0|0|1|2|0|0|0|1  
0|0|0|0|0|0|0|1|0|0|0|0|1|0  
0|0|0|0|0|0|0|0|1|1|0|0|0|0  
0|0|0|0|0|0|0|0|0|0|0|0|0|0  
0|0|1|0|0|1|2|2|4|3|2|3|3|3  
0|1|0|0|0|0|3|2|4|6|1|1|2|1  
0|0|2|0|0|0|0|0|2|0|0|0|0|0  
1|0|0|0|1|1|0|0|0|1|0|0|0|0  
0|0|1|1|0|0|9|5|1|2|0|1|4|4  
0|0|0|0|0|0|1|1|0|3|1|0|0|2  
0|0|1|0|0|0|0|0|1|0|0|0|0|0  
1|0|0|0|0|0|0|0|1|0|0|0|0|1  
0|0|2|0|0|0|0|0|0|1|1|1|2|3  
0|0|0|0|0|0|0|0|2|0|0|1|1  
0|0|0|0|0|0|4|3|2|3|2|2|1|1  
0|0|0|0|0|0|0|0|2|0|0|0|0  
0|0|0|0|0|0|4|5|3|3|0|0|2|1  
0|0|0|0|0|0|0|0|1|1|1|2|0|1  
0|0|0|0|0|0|0|0|0|0|0|0|1|2  
0|0|0|0|0|0|1|1|1|4|2|2|3|2  
1|0|0|0|0|0|2|0|1|1|1|0|0|0  
0|0|3|0|0|0|3|1|2|1|3|1|1|1

(A) entire PPIN

2|0|1|0|0|1|0|0|1|3|0|0|1|1|1  
0|0|0|0|0|0|0|0|0|1|2|0|0|0|0  
0|0|0|0|0|0|2|1|3|3|0|0|2|1  
0|0|0|0|0|0|0|0|6|6|0|0|0|0  
0|0|0|0|0|0|0|0|3|3|0|0|0|0  
0|0|0|0|0|0|1|2|4|5|0|2|0|2  
0|0|0|0|0|0|0|0|0|1|0|0|0|0  
0|0|2|0|0|0|0|0|3|2|1|1|0|1  
0|0|0|0|0|0|0|0|0|0|0|0|0|0  
0|1|0|0|0|0|0|0|1|1|1|0|0|0  
0|0|0|0|0|0|0|0|0|0|0|0|1|2  
0|0|1|0|0|0|0|0|1|1|0|0|0|1  
0|0|0|0|0|0|1|2|2|4|0|0|1|3  
0|0|0|0|0|0|1|0|0|0|1|1|0|0  
0|0|0|0|0|0|1|0|1|1|0|0|1|2  
0|0|0|0|0|0|0|0|0|0|0|0|1|1  
0|0|0|0|0|0|0|0|1|3|0|0|0|1  
0|0|0|0|0|0|0|0|1|1|0|0|0|0  
0|0|0|0|0|0|0|0|1|0|0|0|0|0  
0|0|3|1|0|0|1|1|0|0|1|1|2|8  
0|0|0|0|0|0|4|1|0|1|0|2|1|0  
0|0|2|6|0|0|0|0|1|1|0|1|2|1  
1|0|0|1|0|0|2|0|2|1|0|1|1|0  
0|0|0|0|0|0|0|0|2|2|0|0|0|0  
0|0|0|0|0|0|1|1|1|1|0|0|0|0  
0|0|0|0|0|0|0|0|0|0|0|0|0|0  
0|0|0|0|0|0|0|0|2|1|2|4|5|7  
0|0|0|0|0|0|0|0|1|2|0|1|0|0  
0|0|0|0|0|0|0|0|1|1|0|1|1|0  
0|0|5|5|2|0|0|0|4|4|3|1|0|0  
0|1|2|1|0|0|8|8|4|5|1|3|3|4  
0|0|0|0|0|0|0|0|0|1|0|0|0|0  
0|0|1|0|0|1|4|4|5|3|2|4|0|0  
0|1|0|0|0|0|1|1|2|2|0|0|2|1  
1|0|0|0|0|0|1|1|1|0|0|0|0|0  
0|0|0|0|0|0|3|2|1|2|0|0|1|1  
0|0|0|0|0|0|1|1|1|1|1|1|0|0  
0|0|0|0|0|0|0|0|0|0|0|1|0|0  
0|0|3|5|2|0|0|0|1|3|0|0|0|0  
0|0|0|0|0|0|0|0|1|0|2|0|0|0  
0|0|0|0|0|0|0|0|1|0|0|0|0|0  
0|0|0|0|0|0|2|1|2|2|0|0|0|1  
0|0|0|0|0|0|0|0|0|0|0|0|0|0  
0|0|0|0|0|0|0|0|2|2|0|0|0|0  
0|0|0|0|0|0|0|0|0|0|0|0|0|0  
0|0|1|1|0|0|0|0|1|2|0|0|0|1  
0|0|0|0|0|0|0|0|0|0|0|0|0|0  
0|0|3|1|0|0|1|1|3|2|1|2|2|1  
1|1|0|0|0|0|0|0|1|0|1|1|1|1  
0|0|0|0|0|0|0|0|0|0|0|0|0|0

(A) entire PPIN

0|0|0|0|0|0|0|2|0|0|1|2|1  
0|0|0|0|0|1|1|0|0|0|0|0|0|0  
0|0|0|0|0|0|0|0|0|0|0|0|1|0  
3|1|0|0|0|0|3|0|6|9|6|4|1|0  
0|0|1|1|0|0|2|0|1|3|2|1|0|0  
0|0|0|0|0|1|0|0|4|3|0|0|0|0  
0|0|0|0|0|0|0|0|0|0|0|0|0|0  
1|1|3|5|2|0|9|4|7|10|3|2|4|3  
0|0|2|1|0|0|0|1|1|1|0|0|0|0  
0|0|0|0|0|0|6|6|7|8|0|1|10|14  
0|0|1|0|0|0|0|0|0|0|0|0|0|0  
0|0|0|0|0|0|1|1|2|1|0|0|0|0  
1|1|0|0|0|1|2|2|1|2|1|1|2|1  
2|2|2|0|0|2|1|2|1|2|2|2|0|0  
0|0|0|0|0|0|2|2|1|2|0|0|1|1  
0|0|0|0|0|0|0|2|3|0|2|1|0  
0|0|0|0|0|0|0|0|0|0|0|0|0|0  
1|0|3|0|0|0|2|1|9|9|3|4|3|2  
1|0|1|1|0|0|1|0|1|2|0|0|1|1  
0|0|1|0|0|0|1|0|1|2|0|0|0|1  
0|0|1|1|0|0|0|0|1|1|0|1|3|1  
3|3|2|3|1|4|2|3|9|11|5|4|0|0  
0|0|0|0|0|0|0|0|0|0|0|0|0|0  
0|0|2|0|0|0|0|0|4|7|6|5|0|0  
0|0|0|0|0|0|1|1|5|6|0|0|1|2  
0|0|0|0|0|0|0|0|0|0|0|0|0|0  
0|0|1|0|0|0|2|1|5|5|4|4|9|7  
1|1|6|0|0|0|1|1|4|5|1|3|2|0  
2|8|2|3|0|0|2|14|4|2|0|0|0|0  
0|0|0|0|0|0|0|0|0|0|0|0|0|0  
0|0|0|0|0|0|0|0|0|0|0|0|0|0  
0|0|1|1|1|0|0|0|2|3|1|1|1|0  
4|4|0|0|0|1|7|7|8|8|2|3|1|3  
1|1|0|1|1|1|2|1|6|7|0|0|1|0  
1|2|1|0|0|1|1|1|2|2|0|0|1|3  
0|1|0|1|0|1|0|0|0|0|1|2|4|0  
2|1|6|4|1|3|4|4|4|10|2|2|3|7  
0|0|1|0|0|0|1|2|3|8|1|0|2|0  
0|0|1|0|0|0|0|0|2|2|1|0|2|2  
0|0|0|0|0|0|0|0|0|0|0|0|0|0  
1|2|3|1|0|0|4|5|3|6|3|4|4|3  
0|0|3|0|0|0|0|2|1|6|3|3|2|3  
0|1|0|0|0|1|0|0|3|3|0|0|2|2  
1|0|0|1|0|0|0|0|1|3|1|1|1|2  
1|1|1|0|0|1|0|0|1|2|2|1|0|0  
5|9|6|1|1|7|4|8|9|8|2|2|2|5  
2|1|6|5|1|1|0|1|9|11|3|1|5|4  
2|0|1|0|0|1|1|2|6|6|4|4|2|1  
0|0|0|0|0|0|5|3|4|5|1|1|4|5  
0|0|0|0|0|0|2|1|3|6|0|0|0|1  
0|0|0|0|0|0|1|1|3|0|0|7|4

(A) entire PPIN

1|0|0|0|0|0|0|3|6|0|1|0|1  
19|1|20|3|23|4|24|3|20|8|17|3|22|7|26|3|24|9|25|0|25|7|22|5|21|7  
20|28|32|41|47|26|19|21|63|55|24|27|51|45  
13|18|15|11|7|18|37|36|33|40|23|28|28|38  
9|7|15|8|11|10|21|22|30|35|26|26|43|38  
22|31|47|47|47|25|23|26|44|50|30|37|22|15  
12|11|12|11|8|19|1|6|46|50|13|12|0|0  
10|9|18|16|7|7|12|12|24|29|6|7|22|22  
5|4|8|7|7|4|16|13|21|22|9|12|18|19  
7|8|9|12|12|7|18|16|33|29|14|14|28|24  
12|18|29|29|19|17|19|23|30|31|29|27|0|0  
9|7|3|0|1|6|10|14|22|27|17|21|15|20  
10|9|9|6|2|13|16|10|15|20|36|36|17|15  
10|11|13|15|7|11|6|9|23|23|14|11|1|0  
7|1|14|10|1|2|0|0|19|26|8|7|6|3  
8|10|7|3|1|9|11|8|19|16|7|5|6|8  
8|5|1|1|7|0|5|6|5|16|17|4|5|15|11  
1|1|2|1|1|1|10|9|4|7|2|3|11|9  
1|5|3|3|1|3|8|6|10|16|3|5|11|11  
1|1|4|3|1|2|5|6|6|10|2|4|6|5  
1|1|12|9|13|10|12|7|10|13|14|10|10|3|1  
2|1|13|10|8|5|5|4|11|11|9|9|3|2  
2|4|9|6|3|4|2|2|10|10|4|4|9|6  
3|6|6|5|3|4|0|0|5|5|1|2|6|8  
5|7|10|7|8|5|0|0|8|6|1|1|1|0  
6|10|3|1|0|10|3|8|11|12|9|10|0|5  
2|2|2|2|0|2|1|0|6|6|3|2|7|7  
4|4|4|4|1|5|1|1|7|7|4|6|3|6  
5|7|3|2|1|7|3|3|7|8|7|8|4|7  
2|3|3|4|0|1|4|6|4|5|5|8|1|0  
1|3|7|5|3|2|3|6|8|7|5|5|0|1  
3|1|3|1|0|3|8|6|8|7|4|5|4|8  
3|3|8|6|6|3|3|5|8|8|4|6|7|8  
3|4|6|8|3|4|4|5|7|6|6|6|2|1  
0|0|5|6|4|0|4|5|6|8|0|0|3|5  
1|2|0|0|0|2|6|5|5|7|1|1|4|3  
3|1|1|1|0|2|5|4|5|5|4|4|3|5  
3|0|2|0|0|1|1|0|10|9|0|3|2|2  
3|1|9|7|6|0|2|1|7|6|2|2|7|5  
0|0|9|8|3|1|1|0|1|1|0|0|5|9  
0|0|10|8|4|0|1|2|5|7|1|2|3|6  
2|0|4|4|2|1|1|0|3|3|2|1|1|1  
3|2|4|1|0|2|0|0|5|5|1|1|4|5  
1|0|4|1|2|2|1|1|3|3|0|0|4|3  
1|0|5|2|0|2|3|0|5|7|1|1|2|1  
2|3|3|1|1|3|4|6|3|4|5|3|2|1  
0|0|1|0|1|0|2|3|4|4|3|1|3|4  
1|1|4|2|1|2|1|1|3|5|3|2|2|2  
5|1|5|3|1|1|1|1|6|6|4|5|4|5  
0|0|3|1|1|1|1|2|2|3|3|1|4|4  
1|0|2|0|0|2|1|4|5|4|3|1|7|3

(A) entire PPIN

2|1|6|6|4|2|0|0|2|2|2|2|1|3  
2|2|4|2|1|1|0|0|6|5|2|3|5|5  
1|1|0|0|0|1|1|3|5|7|1|2|9|6  
0|0|3|0|0|1|4|3|3|7|2|1|3|2  
0|0|1|1|0|0|2|2|2|2|3|3|4|6  
1|0|2|4|2|2|0|0|3|3|2|1|2|3  
2|2|5|5|5|2|0|0|5|7|0|0|9|7  
1|0|2|0|0|0|0|0|7|6|1|1|4|5  
2|1|5|6|2|2|0|0|5|4|1|1|2|1  
2|2|0|0|0|0|3|1|4|3|1|2|5|2  
5|1|6|10|7|2|0|0|1|3|0|0|6|5  
1|0|3|1|1|0|0|0|3|5|2|2|2|2  
4|4|0|0|0|1|2|5|2|6|3|2|0|1  
1|1|1|1|0|2|4|3|3|4|1|2|4|4  
3|1|0|0|0|2|1|0|3|4|0|0|4|4  
4|2|5|3|1|2|1|0|4|7|1|0|3|1  
2|1|2|2|0|2|2|2|4|6|2|2|0|0  
0|0|0|0|0|0|2|2|2|2|2|1|2  
1|0|1|2|1|1|0|0|3|3|2|2|1|1  
0|0|3|4|0|0|0|0|2|2|0|0|4|2  
3|3|0|0|0|0|1|2|3|5|0|0|0|0  
1|0|0|0|0|0|5|2|3|1|2|1|4|1  
0|0|1|0|0|0|2|1|2|3|2|3|2|1  
2|1|3|1|1|1|1|0|3|5|0|0|5|2  
2|1|2|1|1|2|1|1|2|1|3|3|0|0  
0|1|3|5|2|1|0|0|3|5|0|0|0|0  
3|3|0|0|0|1|1|1|2|3|1|2|1|1  
0|0|4|1|1|0|1|0|4|6|2|6|0|0  
0|0|3|1|1|0|0|0|0|0|1|1|5|2  
0|0|0|2|0|1|0|1|1|3|0|0|14|8  
0|0|0|0|0|0|0|0|0|0|0|0|0|0  
0|0|0|0|0|0|0|0|1|0|0|0|0|0  
0|0|2|1|1|0|1|0|2|2|0|0|0|0  
4|6|5|3|1|2|0|0|8|9|3|4|1|1  
0|0|0|0|0|0|0|0|1|3|1|1|2|1  
0|0|1|1|0|0|0|0|0|0|0|0|0|0  
1|1|1|0|0|1|1|2|1|1|1|0|0|0  
0|0|2|1|0|1|0|0|0|2|4|4|1|0  
0|0|0|0|0|0|0|0|0|0|0|0|0|0  
0|0|0|0|0|0|1|0|0|2|1|0|1|1  
0|0|0|0|0|0|0|0|0|0|0|0|0|0  
0|0|1|0|0|0|0|0|1|2|1|1|1|1  
0|0|1|0|0|0|0|0|0|0|0|0|1|1  
0|0|0|0|0|0|0|0|3|4|0|0|4|3  
0|1|1|1|1|1|0|0|1|1|0|1|0|1  
0|0|0|0|0|0|0|0|0|1|1|0|0|0  
0|0|1|0|0|0|0|0|0|2|0|0|0|0  
0|0|1|1|0|0|1|1|1|1|0|0|0|0  
0|0|0|0|0|0|0|0|1|1|0|0|1|0  
1|0|2|1|0|0|0|0|2|2|2|1|0|0  
1|0|0|0|0|1|0|0|2|2|0|0|2|2

(A) entire PPIN

0|0|0|0|0|0|0|1|1|0|0|0|0|  
0|0|0|0|0|0|0|2|3|2|1|1|0|  
0|0|5|6|1|0|0|0|2|2|0|0|0|0|  
0|0|0|0|0|0|0|0|0|0|0|1|0|  
1|1|1|1|1|1|1|1|3|1|1|1|2|2|  
0|0|0|0|0|0|0|0|0|0|0|0|0|0|  
1|0|0|0|0|0|0|0|0|1|0|0|0|0|  
0|0|1|0|0|0|0|0|0|0|0|0|1|1|  
0|0|0|0|0|0|0|0|0|1|0|0|0|0|  
0|0|0|0|0|0|0|0|0|0|0|0|0|0|  
0|0|0|0|0|0|0|0|0|0|0|0|0|0|  
0|0|1|0|0|0|0|0|1|1|0|0|0|0|  
0|0|0|0|0|0|0|0|0|0|0|0|0|0|  
0|0|1|0|0|1|0|0|1|1|1|1|1|1|  
0|0|0|0|0|0|0|0|0|0|0|0|0|0|  
0|0|0|0|0|0|0|5|8|0|0|1|0|  
0|0|0|0|0|0|0|0|1|0|0|0|0|  
1|0|0|0|0|0|1|0|1|1|1|0|0|0|  
0|0|0|0|0|0|0|0|1|0|24|25|0|0|  
0|0|0|0|0|0|0|0|1|1|0|0|1|1|  
0|0|0|0|0|0|0|0|0|0|0|0|0|0|  
0|0|0|0|0|0|0|0|0|0|0|0|0|0|  
0|0|0|0|0|0|0|0|0|0|0|0|0|0|  
0|0|0|0|0|0|0|0|1|0|0|0|0|0|  
0|0|0|0|0|0|0|0|0|1|0|0|1|0|  
0|0|0|0|0|0|0|0|0|0|0|0|2|1|  
0|0|0|0|0|0|0|1|2|1|3|1|0|1|1|  
1|0|1|0|0|0|0|0|1|2|0|0|0|0|  
0|0|1|0|0|0|0|0|0|0|0|0|0|0|  
0|0|0|0|0|0|0|0|2|1|0|0|2|5|  
0|0|0|0|0|0|0|0|2|2|0|0|0|0|  
0|0|1|1|0|0|1|1|0|0|0|0|0|0|  
0|0|0|0|0|0|0|2|2|0|1|0|0|0|0|  
0|0|0|0|0|0|0|0|3|4|0|0|0|0|  
0|0|0|0|0|0|0|1|0|0|1|0|1|0|0|  
0|0|0|0|0|0|0|0|0|0|0|0|0|0|  
1|0|2|0|0|0|0|0|0|0|0|0|1|0|  
0|0|0|0|0|0|0|0|0|1|0|0|1|0|  
0|0|0|0|0|0|0|0|0|1|1|0|0|0|  
0|0|0|0|0|0|0|0|0|0|0|0|0|0|  
0|0|0|0|0|0|0|0|1|0|0|0|0|  
0|0|0|0|0|0|0|0|0|0|0|0|0|0|  
0|0|0|0|0|0|1|0|0|1|1|0|0|2|1|  
0|0|2|1|0|0|0|0|0|0|0|0|0|0|  
2|3|0|0|0|0|1|1|0|2|1|1|0|0|  
0|0|0|0|0|0|0|0|0|2|0|0|0|0|  
0|0|0|0|0|0|0|0|0|1|0|0|0|0|  
0|0|0|0|0|0|0|0|1|1|0|0|0|1|  
0|0|0|0|0|0|0|0|0|0|0|0|1|1|  
0|0|0|0|0|0|0|0|0|1|0|0|0|0|  
0|0|0|0|0|0|0|0|0|1|0|0|0|0|

(A) entire PPIN

0|0|0|1|0|0|1|1|0|0|4|6|1|1  
0|0|0|0|0|0|0|0|0|0|0|0|1|0  
0|0|0|0|0|0|0|0|0|0|0|0|0|0  
0|0|0|0|0|0|0|0|0|0|0|0|1|1  
0|1|0|0|0|0|0|0|1|0|0|0|1|1  
0|0|1|0|0|0|0|0|0|0|0|0|0|0  
0|0|0|0|0|0|0|0|0|0|0|0|0|0  
0|0|0|0|0|0|0|0|0|0|0|0|0|0  
0|0|0|0|0|0|0|0|0|0|0|0|0|0  
1|0|1|0|0|2|0|0|1|1|0|0|0|1  
0|0|0|0|0|0|0|0|0|0|0|0|0|0|0  
0|0|0|0|0|0|0|0|0|0|0|0|0|0|0  
0|0|0|0|0|0|0|0|0|0|0|0|0|0|0  
0|0|0|0|0|0|0|0|0|0|0|0|0|0|0  
0|0|0|0|0|0|0|0|0|0|0|0|0|0|0  
2|0|0|0|0|0|1|1|5|2|0|1|0|0|0  
0|0|0|0|0|0|0|0|0|0|0|0|0|0|0  
0|0|0|0|0|0|0|0|1|3|0|0|0|0|0  
0|0|0|0|0|0|0|0|0|0|0|0|0|0|0  
0|0|0|0|0|0|0|0|0|0|0|0|0|0|0  
0|0|0|0|0|0|0|0|0|0|0|0|0|0|0  
0|0|0|0|0|0|0|0|0|1|0|0|0|0|0  
0|0|0|0|0|0|0|0|0|0|2|24|1|1  
0|0|1|0|0|0|0|0|0|1|0|0|0|0|0  
0|0|0|0|0|0|0|0|0|0|0|0|0|0|0  
0|0|0|0|0|0|0|0|0|0|0|0|0|0|0  
1|0|0|0|0|0|0|1|2|2|1|1|0|0|0  
0|0|0|0|0|0|0|0|0|0|0|0|0|0|0  
0|0|0|0|0|0|0|0|0|0|0|0|0|0|0  
0|0|0|0|0|0|0|0|0|0|0|0|0|0|0  
0|0|0|0|0|0|0|0|0|0|0|0|0|0|0  
0|0|0|0|0|0|0|0|0|0|0|0|0|0|0  
0|0|0|0|0|0|0|0|0|0|0|0|0|0|0  
0|0|0|0|0|0|0|0|0|0|0|0|0|0|0  
0|0|0|0|0|0|0|0|0|0|0|0|0|0|0  
0|0|0|0|0|0|0|0|0|0|0|0|0|0|0  
0|0|0|0|0|0|0|0|0|0|0|0|0|0|0  
0|0|0|0|0|0|0|0|0|1|0|8|1|0|0|0  
0|0|0|0|0|0|0|1|0|0|0|0|0|0|0|0  
0|0|0|0|0|0|0|0|0|0|0|0|0|0|0|0  
0|0|0|0|0|0|0|0|0|0|0|0|0|0|0|0  
0|0|1|0|0|0|0|0|0|2|0|0|0|0|0|0  
0|0|0|0|0|0|0|0|0|0|0|0|0|0|0|0  
0|0|1|0|0|0|2|0|1|1|1|1|1|0|0  
0|0|0|0|0|0|0|0|0|0|0|0|0|0|0|0  
1|1|0|0|0|1|0|0|2|1|1|1|0|0|0  
0|0|0|0|0|0|0|0|0|0|0|0|0|0|0|0  
0|0|0|0|0|0|0|0|0|0|0|0|0|0|0|0  
0|0|1|0|0|0|0|0|0|0|0|0|0|0|0|0  
0|0|0|0|0|0|0|0|0|0|0|0|0|0|0|0  
0|0|0|0|0|0|0|0|0|0|0|0|0|0|0|0







(A) entire PPIN

0|0|2|1|1|0|1|0|2|2|0|0|0|0|  
0|0|0|0|0|0|0|0|0|0|0|0|0|0|  
0|0|1|0|0|0|0|0|1|2|1|1|1|1|  
0|0|0|0|0|0|0|0|0|0|0|0|0|0|  
0|0|0|0|0|0|0|0|2|2|0|0|0|0|  
0|0|0|0|0|0|0|0|0|0|0|0|0|0|  
0|0|0|0|0|0|0|0|0|0|0|0|0|0|  
0|1|0|0|0|0|1|1|2|2|0|0|2|1|  
0|0|2|0|0|0|0|0|0|1|1|1|2|3|  
1|0|0|0|0|0|0|0|3|6|0|1|0|1|  
1|1|1|0|0|1|0|0|1|2|2|1|0|0|  
2|2|2|0|0|2|1|2|1|2|2|2|0|0|  
0|0|3|4|0|0|0|0|2|2|0|0|4|2|  
2|1|1|0|0|1|1|0|1|1|1|0|2|3|  
0|0|0|0|0|0|0|0|2|1|2|4|5|7|  
0|0|3|5|2|0|0|0|1|3|0|0|0|0|  
0|0|6|3|0|0|0|0|0|0|3|10|0|  
0|1|0|0|0|1|0|0|3|3|0|0|2|2|  
19|1|20|3|23|4|24|3|20|8|17|3|22|7|26|3|24|9|25|0|25|7|22|5|21|7|  
22|3|1|4|7|4|7|4|7|25|23|26|44|50|30|37|22|15|  
13|18|15|11|7|18|37|36|33|40|23|28|28|38|  
12|11|12|11|8|19|1|6|46|50|13|12|0|0|  
9|7|15|8|11|10|21|22|30|35|26|26|43|38|  
10|9|9|6|2|13|16|10|15|20|36|36|17|15|  
12|18|29|29|19|17|19|23|30|31|29|27|0|0|  
7|8|9|12|12|7|18|16|33|29|14|14|28|24|  
20|28|32|41|47|26|19|21|63|55|24|27|51|45|  
10|11|13|15|7|11|6|9|23|23|14|11|1|0|  
8|10|7|3|1|9|11|8|19|16|7|5|6|8|  
5|4|8|7|7|4|16|13|21|22|9|12|18|19|  
2|1|13|10|8|5|5|4|1|1|11|9|9|3|2|  
10|9|18|16|7|7|12|12|24|29|6|7|22|22|  
3|3|2|3|1|4|2|3|9|11|5|4|0|0|  
11|12|9|13|10|12|7|10|13|14|10|10|3|1|  
5|9|6|1|1|7|4|8|9|8|2|2|2|5|  
18|26|21|25|9|31|1|2|1|0|3|2|5|6|  
1|5|3|3|1|3|8|6|10|16|3|5|11|11|  
7|1|14|10|1|2|0|0|19|26|8|7|6|3|  
5|7|10|7|8|5|0|0|8|6|1|1|1|0|  
3|4|6|8|3|4|4|5|7|6|6|6|2|1|  
2|3|3|4|0|1|4|6|4|5|5|8|1|0|  
1|3|7|5|3|2|3|6|8|7|5|5|0|1|  
3|1|1|1|0|2|5|4|5|5|4|4|3|5|  
4|4|4|4|1|5|1|1|7|7|4|6|3|6|  
0|0|0|0|0|0|5|6|16|19|0|0|12|23|  
9|7|3|0|1|6|10|14|22|27|17|21|15|20|  
0|0|0|0|0|0|0|0|0|0|2|24|11|  
0|0|0|0|0|0|6|6|7|8|0|1|10|14|  
2|3|3|1|1|3|4|6|3|4|5|3|2|1|  
0|0|1|0|0|0|2|1|5|5|4|4|9|7|  
4|4|0|0|0|1|7|7|8|8|2|3|1|3|

(A) entire PPIN

0|1|2|1|0|0|8|8|4|5|1|3|3|4  
1|1|4|3|1|2|5|6|6|10|2|4|6|5  
2|1|6|4|1|3|4|4|4|10|2|2|3|7  
8|5|1|1|7|0|5|6|5|16|17|4|5|15|11  
1|1|3|5|2|0|9|4|7|10|3|2|4|3  
2|1|2|2|0|2|2|2|4|6|2|2|0|0  
3|3|8|6|6|3|3|5|8|8|4|6|7|8  
3|0|2|0|0|1|1|0|10|9|0|3|2|2  
0|0|1|0|1|0|2|3|4|4|3|1|3|4  
1|2|0|0|0|2|6|5|5|7|1|1|4|3  
1|0|3|0|0|0|2|1|9|9|3|4|3|2  
0|0|0|0|0|0|5|5|4|6|0|0|5|3  
0|0|3|1|1|1|1|2|2|3|3|1|4|4  
2|1|6|6|4|2|0|0|2|2|2|2|1|3  
0|0|0|0|0|0|5|3|4|5|1|1|4|5  
5|1|5|3|1|1|1|1|6|6|4|5|4|5  
0|0|0|0|0|0|4|3|2|3|2|2|1|1  
0|0|1|1|0|0|2|2|2|2|3|3|4|6  
3|3|0|0|0|1|1|1|2|3|1|2|1|1  
1|1|0|0|0|1|2|2|1|2|1|1|2|1  
2|4|9|6|3|4|2|2|10|10|4|4|9|6  
4|4|0|0|0|1|2|5|2|6|3|2|0|1  
0|0|0|0|0|0|2|2|2|2|2|2|1|2  
6|10|3|1|0|10|3|8|1|1|12|9|10|0|5  
1|0|0|0|0|0|5|2|3|1|2|1|4|1  
0|0|9|8|3|1|1|0|1|1|0|0|5|9  
1|0|4|3|0|0|0|1|3|3|0|0|0|0  
1|0|2|4|2|2|0|0|3|3|2|1|2|3  
0|0|2|2|1|1|6|3|2|2|1|1|1|1  
2|1|2|1|1|2|1|1|2|1|3|3|0|0  
2|2|0|0|0|0|3|1|4|3|1|2|5|2  
5|1|6|10|7|2|0|0|1|3|0|0|6|5  
1|1|2|1|1|1|10|9|4|7|2|3|1|1|9  
5|7|3|2|1|7|3|3|7|8|7|8|4|7  
0|0|4|1|1|0|1|0|4|6|2|6|0|0  
4|6|5|3|1|2|0|0|8|9|3|4|1|1  
0|0|0|0|0|0|1|2|4|5|0|2|0|2  
1|2|3|1|0|0|4|5|3|6|3|4|4|3  
0|0|2|0|0|0|0|0|4|7|6|5|0|0  
1|1|4|2|1|2|1|1|3|5|3|2|2|2  
12|0|6|0|0|0|0|0|0|0|1|0|1|2  
0|0|0|0|0|0|1|1|1|4|2|2|3|2  
0|0|1|0|0|0|4|1|2|6|1|1|1|1  
3|1|9|7|6|0|2|1|7|6|2|2|7|5  
3|1|3|1|0|3|8|6|8|7|4|5|4|8  
2|2|4|2|1|1|0|0|6|5|2|3|5|5  
1|0|4|1|2|2|1|1|3|3|0|0|4|3  
0|0|1|0|0|0|0|0|1|1|0|0|0|0  
0|0|0|0|0|0|0|0|0|0|0|0|0|0  
1|1|0|0|0|0|0|0|1|0|1|1|1|1  
1|0|0|0|0|0|1|0|1|1|1|0|0|0

(A) entire PPIN

```

0|0|0|0|0|0|0|0|0|0|0|0|0|0|0|0|0|
0|0|0|0|0|0|1|1|1|1|1|1|1|0|0|
1|1|1|0|0|1|1|2|1|1|1|0|0|0|
1|0|0|0|0|0|0|1|1|1|0|0|0|0|
0|0|1|0|0|0|2|1|2|3|2|3|2|1|
0|0|1|1|0|0|0|0|1|1|0|1|3|1|
0|1|1|1|1|1|0|0|1|1|0|1|0|1|
0|0|0|0|0|0|0|0|4|3|1|2|0|0|
1|1|6|0|0|0|1|1|4|5|1|3|2|0|
1|1|0|0|0|1|1|1|1|1|1|1|0|0|
0|0|1|0|0|1|2|2|4|3|2|3|3|3|
2|2|2|2|0|2|1|0|6|6|3|2|7|7|
0|0|1|0|0|0|1|2|3|8|1|0|2|0|
0|0|1|1|0|0|9|5|1|2|0|1|4|4|
0|0|5|6|4|0|4|5|6|8|0|0|3|5|
0|0|0|0|0|0|3|2|1|2|0|0|1|1|
0|0|0|0|0|0|0|0|1|2|0|0|0|0|
1|1|0|0|0|1|1|3|5|7|1|2|9|6|
2|1|5|6|2|2|0|0|5|4|1|1|2|1|
0|0|0|0|0|0|0|0|0|1|0|0|0|0|
1|0|0|0|0|0|2|0|1|1|1|0|0|0|
1|1|1|1|0|2|4|3|3|4|1|2|4|4|
0|0|0|0|0|0|0|0|0|0|0|0|0|0|
2|1|6|5|1|1|0|1|9|1|1|3|1|5|4|
3|3|0|0|0|0|1|2|3|5|0|0|0|0|
0|0|0|0|0|0|0|0|0|0|0|0|0|0|
2|1|1|0|0|1|5|5|5|6|0|0|0|0|
0|0|0|0|0|0|0|0|0|0|0|1|0|0|
1|0|3|1|1|0|0|0|3|5|2|2|2|2|
2|0|1|0|0|1|1|2|6|6|4|4|2|1|
0|0|0|0|0|0|0|0|1|2|0|1|0|0|
0|0|0|0|0|0|0|0|2|5|0|0|0|0|
0|0|0|0|0|0|0|0|0|0|0|0|0|0|
1|0|0|0|0|0|0|0|1|1|0|1|0|0|
0|0|0|0|0|0|4|5|3|3|0|0|2|1|
0|0|0|0|0|0|0|0|0|0|0|0|0|0|
0|0|0|0|0|0|0|0|0|0|0|0|0|0|
0|0|1|0|0|0|0|0|1|1|0|0|0|0|
0|0|0|0|0|0|1|1|5|6|0|0|1|2|
2|1|3|1|1|1|1|0|3|5|0|0|5|2|
1|0|2|0|0|0|0|0|7|6|1|1|4|5|
0|0|1|0|0|0|0|0|0|0|0|0|0|0|
0|0|0|0|0|0|0|0|1|1|0|0|0|0|
0|0|0|0|0|0|0|0|0|0|0|0|0|0|
1|0|0|0|0|1|0|0|0|0|0|0|0|1|
0|0|3|0|0|1|4|3|3|7|2|1|3|2|
0|0|0|0|0|0|0|0|0|0|0|0|0|0|
1|0|0|1|0|0|2|0|2|1|0|1|1|0|
1|1|0|1|1|1|2|1|6|7|0|0|1|0|
0|0|0|0|0|0|0|0|0|0|0|0|0|0|
0|0|0|0|0|0|0|0|0|0|0|0|0|0|

```



(A) entire PPIN

2|1|2|1|0|0|1|1|0|2|2|3|0|0  
0|0|0|0|0|0|0|0|0|0|0|0|0|0  
0|0|0|0|0|0|0|0|0|0|0|0|0|0  
0|0|0|0|0|0|0|0|0|0|0|0|0|0  
0|0|0|0|0|0|2|0|4|3|0|0|0|1  
0|0|0|0|0|0|0|0|0|0|0|0|0|0  
0|0|0|0|0|0|0|0|0|0|0|0|0|0  
0|0|0|0|0|0|0|0|0|0|0|0|0|0  
0|0|0|0|0|0|2|2|1|2|2|1|0|0  
0|0|0|0|0|0|0|0|0|1|0|0|0|0  
0|0|0|0|0|0|0|0|0|0|0|0|0|0  
0|0|0|0|0|0|0|1|1|1|0|0|0|1  
1|0|0|0|0|0|0|0|1|0|0|0|0|1  
0|0|1|1|1|0|0|0|2|3|1|1|1|0  
0|0|0|0|0|0|0|0|0|0|0|0|0|0  
0|0|0|0|0|0|2|1|1|1|0|0|1|0  
0|1|0|0|0|1|0|0|0|1|0|0|0|0  
0|0|3|0|0|0|0|2|1|6|3|3|2|3  
0|0|0|0|0|0|0|0|0|0|0|0|0|0  
0|0|0|0|0|0|0|0|1|1|0|0|0|1  
0|1|3|5|2|1|0|0|3|5|0|0|0|0  
0|0|0|0|0|0|0|0|0|0|0|0|0|0  
0|0|0|0|0|0|0|0|0|0|0|0|0|0  
0|0|0|0|0|0|3|4|0|0|1|0|0|0  
3|2|4|1|0|2|0|0|5|5|1|1|4|5  
0|0|0|0|0|0|0|0|0|0|0|0|1|0|0  
0|0|0|0|0|0|0|0|0|0|0|0|0|0  
0|0|1|0|0|0|0|0|0|0|0|0|0|0  
0|0|0|0|0|0|0|0|0|0|0|0|0|0  
3|1|0|0|0|2|1|0|3|4|0|0|4|4  
0|1|0|0|0|0|0|0|0|0|0|0|0|0  
0|0|0|0|0|0|1|0|1|0|0|0|0|2  
0|0|1|0|0|0|0|0|1|0|0|0|0|0  
0|0|1|0|0|0|0|0|0|2|0|0|0|0  
0|0|0|0|0|0|0|0|0|0|0|0|0|0  
0|0|0|0|0|0|0|0|0|0|0|0|0|0  
0|0|3|1|0|0|1|1|3|2|1|2|2|1  
0|0|0|0|0|0|0|0|0|0|0|0|0|0  
0|0|0|0|0|0|0|0|0|0|0|0|0|0  
0|0|0|0|0|0|0|0|0|0|0|0|0|0  
0|0|0|0|0|0|0|3|2|0|1|0|0|0|0  
0|0|0|0|0|0|0|0|1|0|0|0|0|0  
0|0|0|0|0|0|0|0|0|0|0|0|0|0  
0|0|0|0|0|0|4|1|0|1|0|2|1|0  
0|0|0|0|0|0|0|0|0|0|0|0|0|0  
0|0|0|0|0|0|0|0|0|0|0|0|0|0  
0|0|0|0|0|0|0|0|0|0|0|0|0|0  
0|0|0|0|0|0|0|0|0|0|0|0|0|0  
0|0|0|0|0|0|0|0|0|0|0|0|0|0  
0|0|0|0|0|0|0|0|0|0|0|0|0|0







(A) entire PPIN

20|28|32|41|47|26|19|21|63|55|24|27|51|45  
10|9|18|16|7|7|12|12|24|29|6|7|22|22  
10|9|9|6|2|13|16|10|15|20|36|36|17|15  
9|7|15|8|11|10|21|22|30|35|26|26|43|38  
7|8|9|12|12|7|18|16|33|29|14|14|28|24  
5|4|8|7|7|4|16|13|21|22|9|12|18|19  
12|11|12|11|8|19|1|6|46|50|13|12|0|0  
12|18|29|29|19|17|19|23|30|31|29|27|0|0  
10|11|13|15|7|11|6|9|23|23|14|11|1|0  
8|5|11|7|0|5|6|5|16|17|4|5|15|11  
1|1|4|3|1|2|5|6|6|10|2|4|6|5  
2|1|13|10|8|5|5|4|11|11|9|9|3|2  
1|5|3|3|1|3|8|6|10|16|3|5|11|11  
1|1|2|1|1|1|10|9|4|7|2|3|11|9  
11|12|9|13|10|12|7|10|13|14|10|10|3|1  
1|1|3|5|2|0|9|4|7|10|3|2|4|3  
0|0|0|0|0|0|6|6|7|8|0|1|10|14  
2|1|6|4|1|3|4|4|4|10|2|2|3|7  
5|1|6|10|7|2|0|0|1|3|0|0|6|5  
3|6|6|5|3|4|0|0|5|5|1|2|6|8  
0|0|10|8|4|0|1|2|5|7|1|2|3|6  
2|4|9|6|3|4|2|2|10|10|4|4|9|6  
7|1|14|10|1|2|0|0|19|26|8|7|6|3  
3|4|6|8|3|4|4|5|7|6|6|6|2|1  
5|7|10|7|8|5|0|0|8|6|1|1|1|0  
0|0|5|6|4|0|4|5|6|8|0|0|3|5  
8|10|7|3|1|9|11|8|19|16|7|5|6|8  
9|7|3|0|1|6|10|14|22|27|17|21|15|20  
6|10|3|1|0|10|3|8|11|12|9|10|0|5  
4|4|0|0|0|1|7|7|8|8|2|3|1|3  
2|1|6|5|1|1|0|1|9|11|3|1|5|4  
2|1|6|6|4|2|0|0|2|2|2|2|1|3  
0|1|2|1|0|0|8|8|4|5|1|3|3|4  
1|3|7|5|3|2|3|6|8|7|5|5|0|1  
3|3|2|3|1|4|2|3|9|11|5|4|0|0  
2|0|1|0|0|1|1|2|6|6|4|4|2|1  
4|4|4|4|1|5|1|1|7|7|4|6|3|6  
3|1|9|7|6|0|2|1|7|6|2|2|7|5  
3|3|8|6|6|3|3|5|8|8|4|6|7|8  
2|2|2|2|0|2|1|0|6|6|3|2|7|7  
0|0|0|0|0|0|5|3|4|5|1|1|4|5  
3|1|1|1|0|2|5|4|5|5|4|4|3|5  
2|2|5|5|5|2|0|0|5|7|0|0|9|7  
5|1|5|3|1|1|1|1|6|6|4|5|4|5  
1|2|0|0|0|2|6|5|5|7|1|1|4|3  
1|0|4|1|2|2|1|1|3|3|0|0|4|3  
1|0|5|2|0|2|3|0|5|7|1|1|2|1  
3|0|2|0|0|1|1|0|10|9|0|3|2|2  
2|1|3|1|1|1|1|0|3|5|0|0|5|2  
3|2|4|1|0|2|0|0|5|5|1|1|4|5  
0|0|0|0|0|0|0|0|0|0|0|0|0

(A) entire PPIN

0|0|3|1|1|1|1|2|2|3|3|1|4|4  
6|6|2|0|0|3|0|7|4|3|0|0|0|0  
3|1|0|0|0|2|1|0|3|4|0|0|4|4  
2|1|1|0|0|1|5|5|5|6|0|0|0|0  
1|0|2|4|2|2|0|0|3|3|2|1|2|3  
2|3|3|4|0|1|4|6|4|5|5|8|1|0  
0|0|1|0|1|0|2|3|4|4|3|1|3|4  
1|1|1|1|0|2|4|3|3|4|1|2|4|4  
0|0|0|0|0|0|4|3|2|3|2|2|1|1  
5|7|3|2|1|7|3|3|7|8|7|8|4|7  
4|2|5|3|1|2|1|0|4|7|1|0|3|1  
0|0|1|0|0|0|1|2|3|8|1|0|2|0  
0|0|0|0|0|0|1|1|1|4|2|2|3|2  
3|1|3|1|0|3|8|6|8|7|4|5|4|8  
1|0|3|1|1|0|0|0|3|5|2|2|2|2  
0|0|1|0|0|0|2|1|5|5|4|4|9|7  
2|3|3|1|1|3|4|6|3|4|5|3|2|1  
0|0|1|0|0|1|2|2|4|3|2|3|3|3  
0|0|2|2|1|1|6|3|2|2|1|1|1|1  
1|1|4|2|1|2|1|1|3|5|3|2|2|2  
2|2|0|0|0|3|1|4|3|1|2|5|2  
0|0|1|1|0|0|2|2|2|2|3|3|4|6  
5|9|6|1|1|7|4|8|9|8|2|2|2|5  
2|1|2|2|0|2|2|2|4|6|2|2|0|0  
1|2|1|0|0|1|1|1|2|2|0|0|1|3  
2|1|2|1|1|2|1|1|2|1|3|3|0|0  
0|0|3|0|0|1|4|3|3|7|2|1|3|2  
2|2|4|2|1|1|0|0|6|5|2|3|5|5  
3|3|0|0|0|0|1|2|3|5|0|0|0|0  
0|0|0|0|0|0|0|1|0|0|1|0|0  
0|1|0|0|0|0|0|0|1|0|0|0|1|1  
0|0|0|0|0|0|0|0|5|8|0|0|1|0  
0|0|1|0|0|0|1|0|1|2|0|0|0|1  
1|0|0|0|0|0|1|0|1|1|1|0|0|0  
0|0|0|0|0|0|0|0|1|1|0|0|1|1  
0|0|1|1|0|0|0|0|0|0|0|0|0|0  
0|0|0|0|0|0|1|1|1|1|1|1|0|0  
0|0|0|0|0|0|1|2|2|4|0|0|1|3  
0|0|0|0|0|0|4|5|3|3|0|0|2|1  
0|1|1|1|1|1|0|0|1|1|0|1|0|1  
0|0|0|0|0|0|0|0|0|0|0|0|0|0  
0|0|1|0|0|0|0|0|1|1|0|0|0|1  
0|0|0|0|0|0|0|0|2|1|2|4|5|7  
0|0|3|5|2|0|0|0|1|3|0|0|0|0  
0|0|0|0|0|0|0|1|1|3|0|0|7|4  
2|1|2|1|0|0|1|1|0|2|2|3|0|0  
0|0|1|0|0|0|0|0|0|1|0|0|0|0  
0|0|5|6|1|0|0|0|2|2|0|0|0|0  
2|1|5|6|2|2|0|0|5|4|1|1|2|1  
0|0|0|0|0|0|0|0|0|0|0|0|1|0  
0|0|2|0|0|0|0|0|3|2|1|1|0|1

(A) entire PPIN

1|0|0|0|0|0|2|0|1|1|1|0|0|0|0  
0|0|0|0|0|0|1|0|0|4|3|0|0|0|0  
1|1|0|1|1|1|2|1|6|7|0|0|1|0  
3|3|0|0|0|1|1|1|2|3|1|2|1|1  
4|4|0|0|0|1|2|5|2|6|3|2|0|1  
1|1|0|0|0|0|0|0|1|0|1|1|1|1  
4|6|5|3|1|2|0|0|8|9|3|4|1|1  
0|0|0|0|0|0|0|0|1|0|24|25|0|0  
0|0|0|0|0|0|1|0|1|1|0|0|1|2  
1|1|1|0|0|1|1|2|1|1|1|0|0|0  
0|0|0|0|0|0|0|0|0|0|0|0|0|0  
0|0|0|0|0|0|1|0|0|0|0|0|0|1  
1|0|1|0|0|0|0|0|1|2|0|0|0|0  
0|0|1|0|0|0|2|0|1|1|1|1|1|0  
0|0|1|0|0|0|0|0|1|2|1|1|1|1  
0|0|0|0|0|0|0|0|3|4|0|0|4|3  
0|0|0|0|0|0|0|0|4|3|1|2|0|0  
0|0|0|0|0|0|0|0|0|1|0|0|0|0  
0|0|0|0|0|0|0|0|1|2|0|1|2|3  
0|0|1|0|0|0|0|0|2|0|0|0|0  
0|0|0|0|0|0|0|0|0|0|0|0|0|0  
1|0|2|0|0|0|0|0|7|6|1|1|4|5  
0|0|0|0|0|0|0|0|0|0|0|0|0|0  
0|0|0|0|0|0|0|0|0|0|0|0|0|0  
1|0|2|0|0|0|0|0|0|0|0|0|1|0  
0|0|2|0|0|0|0|0|4|7|6|5|0|0  
0|0|0|0|0|0|0|0|0|1|0|0|1|0  
2|2|2|0|0|2|1|2|1|2|2|2|0|0  
1|1|0|0|0|0|0|0|0|0|0|0|0|0  
0|0|0|0|0|0|0|0|0|0|0|0|0|0  
0|0|3|1|0|0|0|0|1|0|0|0|0|0  
0|0|0|0|0|0|0|0|1|0|2|0|0|0  
1|0|0|0|0|0|0|0|1|0|0|0|0|1  
0|0|0|0|0|0|1|0|0|0|1|1|0|0  
0|0|0|0|0|0|0|0|0|0|0|0|0|0  
0|0|0|0|0|0|0|0|1|1|0|0|0|1  
0|0|0|0|0|0|0|0|0|0|0|0|0|0  
0|0|0|0|0|0|0|0|0|1|0|0|0|0  
0|0|0|0|0|0|0|0|0|0|0|0|0|0  
0|0|0|2|0|1|0|1|1|3|0|0|14|8  
0|0|0|0|0|0|0|0|0|0|0|0|0|0  
0|0|0|0|0|0|0|0|0|0|0|0|0|0  
0|0|0|0|0|0|0|0|0|0|0|0|0|0  
0|0|0|0|0|0|0|0|0|0|0|0|0|0  
0|0|0|0|0|0|0|0|1|0|0|0|0|0  
0|0|1|0|0|0|0|0|1|1|0|0|0|0  
0|0|0|0|0|0|0|0|0|0|0|0|0|0  
0|0|0|0|0|0|5|6|16|19|0|0|12|23  
1|0|1|0|0|2|0|0|1|1|0|0|0|1  
0|0|0|0|0|0|0|0|0|0|0|0|0|0  
0|0|0|0|0|0|0|0|0|0|0|0|0|0





(A) entire PPIN

0|0|0|0|0|0|0|0|1|0|0|0|0|  
0|0|0|0|0|0|0|0|0|0|0|0|0|  
0|0|0|0|0|0|1|0|1|1|0|0|0|0|  
2|3|1|0|0|4|0|0|5|4|3|3|1|1|  
2|8|2|3|0|0|2|14|4|2|0|0|0|0|  
0|0|7|3|0|1|0|0|6|13|0|0|0|0|  
3|3|0|0|0|0|1|2|3|5|0|0|0|0|  
0|0|6|1|2|0|0|0|0|0|0|0|0|0|  
0|0|2|1|0|0|0|1|1|1|0|0|2|2|  
0|0|1|0|0|0|0|0|1|0|0|0|0|0|  
6|6|2|0|0|3|0|7|4|3|0|0|0|0|  
0|1|0|0|0|0|0|0|0|1|0|0|0|0|  
1|0|0|0|0|0|0|0|0|0|0|0|0|0|  
0|0|1|0|0|0|0|0|0|2|0|0|0|0|  
0|0|1|0|0|0|0|0|0|2|0|0|0|0|  
0|0|0|0|0|0|0|0|1|1|1|2|0|1|  
1|0|4|3|0|0|0|1|3|3|0|0|0|0|  
0|1|0|0|0|0|0|0|0|1|1|0|0|0|  
1|1|0|0|0|0|0|0|0|0|0|0|0|0|  
0|0|0|0|0|0|0|0|0|0|0|0|0|0|  
1|1|1|0|0|1|0|0|1|2|2|1|0|0|  
2|3|0|0|0|0|1|1|0|2|1|1|0|0|  
0|0|0|0|0|0|1|0|1|0|0|0|0|2|  
0|0|0|1|1|0|0|0|0|0|0|0|0|0|  
1|0|0|0|0|0|0|0|0|1|0|0|0|0|  
0|0|1|0|0|0|4|1|2|6|1|1|1|1|  
1|0|0|1|0|0|2|0|2|1|0|1|1|0|  
0|0|0|0|0|0|0|0|1|4|1|0|2|0|  
0|0|9|8|3|1|1|0|1|1|0|0|5|9|  
0|1|0|0|0|0|1|1|2|2|0|0|2|1|  
0|0|0|0|0|0|0|0|1|2|0|1|0|0|  
0|0|0|0|0|0|0|0|1|0|0|0|0|0|  
0|0|1|0|0|0|0|0|1|0|0|0|0|0|  
0|0|0|0|0|0|0|0|2|5|0|0|0|0|  
0|0|0|0|0|0|0|0|1|3|0|0|0|1|  
0|0|0|0|0|0|0|0|0|0|0|0|0|0|  
0|0|0|0|0|0|0|0|0|2|0|0|0|0|  
0|0|0|0|0|0|0|2|2|0|1|0|0|0|0|  
2|1|0|0|0|0|0|0|0|0|0|0|0|0|  
0|0|3|1|0|0|1|1|3|2|1|2|2|1|  
1|0|0|0|0|0|0|1|1|1|0|0|0|0|  
0|0|3|0|0|0|0|2|1|6|3|3|2|3|  
1|1|1|0|0|1|1|2|1|1|1|0|0|0|  
0|0|0|0|0|0|0|0|0|0|1|0|0|0|  
0|0|0|0|0|0|1|1|2|3|0|0|1|1|  
0|0|3|1|0|0|1|1|0|0|1|1|2|8|  
0|0|0|0|0|0|0|0|5|8|0|0|1|0|  
0|0|0|0|0|0|0|0|0|0|0|0|0|0|  
0|0|0|0|0|0|1|0|0|1|0|1|0|0|  
0|0|0|0|0|0|0|0|1|1|0|0|0|1|  
0|0|0|0|0|0|0|0|0|0|0|0|0|1|



(A) entire PPIN

3|0|2|0|0|1|1|0|10|9|0|3|2|2  
2|1|2|1|0|0|1|1|0|2|2|3|0|0  
0|0|0|0|0|0|0|1|0|2|1|0|2|3  
0|0|1|0|0|1|4|4|5|3|2|4|0|0  
0|0|0|0|0|0|2|0|4|3|0|0|0|1  
0|0|0|0|0|0|3|2|1|2|0|0|1|1  
0|1|0|1|0|1|0|0|0|0|1|2|4|0  
1|1|0|0|0|1|1|1|1|1|1|1|0|0  
0|0|0|0|0|0|4|1|0|1|0|2|1|0  
0|0|5|5|2|0|0|0|4|4|3|1|0|0  
0|0|1|1|1|0|0|0|2|3|1|1|1|0  
0|0|0|0|0|0|0|0|2|2|0|0|0|0  
2|0|1|0|0|1|1|2|6|6|4|4|2|1  
0|1|0|0|0|0|3|2|4|6|1|1|2|1  
0|0|0|0|0|0|0|0|4|3|1|2|0|0  
2|0|4|4|2|1|1|0|3|3|2|1|1|1  
0|0|3|1|1|0|0|0|0|0|1|1|5|2  
2|0|0|0|0|0|1|1|5|2|0|1|0|0  
2|0|1|0|0|1|0|0|1|3|0|0|1|1  
2|2|2|0|0|2|1|2|1|2|2|2|0|0  
0|0|0|0|0|0|5|3|4|5|1|1|4|5  
1|2|1|0|0|1|1|1|2|2|0|0|1|3  
1|0|0|0|0|0|5|2|3|1|2|1|4|1  
0|0|1|0|0|1|0|0|2|3|0|1|4|1  
0|0|0|0|0|0|0|0|0|1|0|0|1|0  
0|0|0|0|0|0|2|1|3|3|0|0|2|1  
19|1|20|3|23|4|24|3|20|8|17|3|22|7|26|3|24|9|25|0|25|7|22|5|21|7  
22|3|1|4|7|4|7|4|7|25|23|26|44|50|30|37|22|15  
20|28|32|41|47|26|19|21|63|55|24|27|51|45  
12|18|29|29|19|17|19|23|30|31|29|27|0|0  
10|9|18|16|7|7|12|12|24|29|6|7|22|22  
12|11|12|11|8|19|1|6|46|50|13|12|0|0  
13|18|15|11|7|18|37|36|33|40|23|28|28|38  
8|10|7|3|1|9|11|8|19|16|7|5|6|8  
7|8|9|12|12|7|18|16|33|29|14|14|28|24  
9|7|3|0|1|6|10|14|22|27|17|21|15|20  
9|7|15|8|11|10|21|22|30|35|26|26|43|38  
10|11|13|15|7|11|6|9|23|23|14|11|1|0  
5|4|8|7|7|4|16|13|21|22|9|12|18|19  
11|12|9|13|10|12|7|10|13|14|10|10|3|1  
7|1|14|10|1|2|0|0|19|26|8|7|6|3  
8|5|1|1|7|0|5|6|5|16|17|4|5|15|11  
10|9|9|6|2|13|16|10|15|20|36|36|17|15  
5|9|6|1|1|7|4|8|9|8|2|2|2|5  
1|1|4|3|1|2|5|6|6|10|2|4|6|5  
3|3|8|6|6|3|3|5|8|8|4|6|7|8  
3|3|2|3|1|4|2|3|9|11|5|4|0|0  
2|1|6|5|1|1|0|1|9|11|3|1|5|4  
1|5|3|3|1|3|8|6|10|16|3|5|11|11  
2|1|13|10|8|5|5|4|1|1|11|9|9|3|2  
5|1|6|10|7|2|0|0|1|3|0|0|6|5



(A) entire PPIN

3|6|6|5|3|4|0|0|5|5|1|2|6|8  
0|0|5|6|4|0|4|5|6|8|0|0|3|5  
0|0|0|0|0|0|6|6|7|8|0|1|10|14  
3|4|6|8|3|4|4|5|7|6|6|6|2|1  
4|4|0|0|0|1|7|7|8|8|2|3|1|3  
2|4|9|6|3|4|2|2|10|10|4|4|9|6  
0|1|2|1|0|0|8|8|4|5|1|3|3|4  
3|1|9|7|6|0|2|1|7|6|2|2|7|5  
2|3|3|4|0|1|4|6|4|5|5|8|1|0  
1|2|0|0|0|2|6|5|5|7|1|1|4|3  
2|2|5|5|5|2|0|0|5|7|0|0|9|7  
2|2|2|2|0|2|1|0|6|6|3|2|7|7  
4|4|4|4|1|5|1|1|7|7|4|6|3|6  
1|1|4|2|1|2|1|1|3|5|3|2|2|2  
0|0|0|0|0|0|0|0|0|0|0|0|0|0  
2|1|6|4|1|3|4|4|4|10|2|2|3|7  
3|1|1|1|0|2|5|4|5|5|4|4|3|5  
1|1|3|5|2|0|9|4|7|10|3|2|4|3  
5|7|10|7|8|5|0|0|8|6|1|1|1|0  
2|2|4|2|1|1|0|0|6|5|2|3|5|5  
5|7|3|2|1|7|3|3|7|8|7|8|4|7  
0|0|1|0|0|0|2|1|5|5|4|4|9|7  
1|0|2|0|0|2|1|4|5|4|3|1|7|3  
2|3|3|1|1|3|4|6|3|4|5|3|2|1  
6|10|3|1|0|10|3|8|1|1|12|9|10|0|5  
0|0|1|0|1|0|2|3|4|4|3|1|3|4  
1|3|7|5|3|2|3|6|8|7|5|5|0|1  
1|0|5|2|0|2|3|0|5|7|1|1|2|1  
1|1|0|0|0|1|1|3|5|7|1|2|9|6  
3|2|4|1|0|2|0|0|5|5|1|1|4|5  
0|0|3|1|1|1|1|2|2|3|3|1|4|4  
2|2|0|0|0|0|3|1|4|3|1|2|5|2  
1|0|4|1|2|2|1|1|3|3|0|0|4|3  
2|1|2|2|0|2|2|2|4|6|2|2|0|0  
2|1|6|6|4|2|0|0|2|2|2|2|1|3  
5|1|5|3|1|1|1|1|6|6|4|5|4|5  
3|1|3|1|0|3|8|6|8|7|4|5|4|8  
2|1|1|0|0|1|5|5|5|6|0|0|0|0  
0|0|1|0|0|1|2|2|4|3|2|3|3|3  
2|1|3|1|1|1|1|0|3|5|0|0|5|2  
2|1|2|1|1|2|1|1|2|1|3|3|0|0  
1|1|2|1|1|1|10|9|4|7|2|3|1|9  
1|0|3|1|1|0|0|0|3|5|2|2|2|2  
4|2|5|3|1|2|1|0|4|7|1|0|3|1  
0|0|0|0|0|0|2|2|2|2|2|2|1|2  
1|0|1|2|1|1|0|0|3|3|2|2|1|1  
0|0|1|0|0|0|1|2|3|8|1|0|2|0  
0|0|0|0|0|0|1|1|1|4|2|2|3|2  
3|1|0|0|0|2|1|0|3|4|0|0|4|4  
0|0|1|1|0|0|2|2|2|2|3|3|4|6  
0|0|0|0|0|0|0|0|0|0|0|0|0|0

(A) entire PPIN

1|1|0|0|0|1|2|2|1|2|1|1|2|1  
0|0|0|0|0|0|5|6|16|19|0|0|12|23  
0|0|1|0|8|4|0|1|2|5|7|1|2|3|6  
0|0|0|0|0|0|0|0|0|0|0|0|0|0|0  
0|0|1|1|0|0|9|5|1|2|0|1|4|4  
1|2|3|1|0|0|4|5|3|6|3|4|4|3  
2|1|5|6|2|2|0|0|5|4|1|1|2|1  
0|0|1|0|0|0|0|0|1|1|0|1|0|0  
0|0|1|0|0|0|1|0|1|2|0|0|0|1  
1|1|0|0|0|0|0|0|1|0|1|1|1|1  
0|0|0|0|0|0|0|0|1|1|0|0|1|1  
0|0|1|1|0|0|0|0|0|0|0|0|0|0  
0|0|1|1|0|0|0|0|1|1|0|1|3|1  
0|0|0|0|0|0|0|0|0|0|0|0|0|0  
0|0|0|0|0|0|4|5|3|3|0|0|2|1  
0|1|1|1|1|1|0|0|1|1|0|1|0|1  
0|0|1|1|0|0|1|1|1|1|0|0|0|0  
0|0|1|0|0|0|0|0|1|1|0|0|0|1  
0|0|0|0|0|0|1|1|5|6|0|0|1|2  
1|0|0|1|0|0|0|0|1|3|1|1|1|2  
1|0|2|0|0|0|0|0|0|0|0|0|1|0  
0|0|0|0|0|0|0|0|0|1|1|0|0|0  
0|0|1|0|0|0|0|0|0|0|0|0|0|0  
1|0|0|0|0|1|0|0|0|0|0|0|0|1  
0|0|0|0|0|0|0|0|0|0|0|0|0|0  
1|1|1|1|1|1|1|1|3|1|1|1|2|2  
0|0|0|0|0|0|0|0|0|0|0|0|0|0  
0|0|0|0|0|0|0|0|1|1|0|0|1|1  
1|1|1|1|0|2|4|3|3|4|1|2|4|4  
0|0|0|0|0|0|1|1|1|1|0|0|0|0  
0|0|1|0|0|0|0|0|0|0|0|0|1|1  
0|0|0|0|0|0|0|0|1|1|0|0|0|1  
0|0|0|0|0|0|0|0|0|1|0|0|0|0  
0|0|0|0|0|0|0|0|0|0|0|0|0|0  
0|0|4|1|1|0|1|0|4|6|2|6|0|0  
0|0|0|0|0|0|5|5|4|6|0|0|5|3  
0|0|0|1|1|0|0|0|0|0|0|0|1|0  
0|0|0|0|0|0|0|0|1|2|0|0|0|1  
0|0|0|0|0|0|0|0|0|0|0|0|0|0  
0|0|1|0|0|0|2|1|2|3|2|3|2|1  
0|0|0|0|0|0|0|0|0|0|0|0|0|0  
0|0|1|0|0|0|2|0|1|1|1|1|1|0  
0|0|1|0|0|0|0|0|1|2|1|1|1|1  
0|0|0|0|0|0|0|0|0|0|0|0|0|0  
0|0|0|0|0|0|0|0|0|1|0|0|0|0  
0|0|2|6|0|0|0|0|1|1|0|1|2|1  
0|0|0|0|0|0|0|0|0|1|0|0|0|0  
0|0|0|0|0|0|0|0|0|0|0|0|0|0  
0|0|0|0|0|1|1|0|0|0|0|0|0|0  
0|0|0|0|0|0|0|0|0|0|0|0|0|0  
1|0|2|0|0|0|0|0|7|6|1|1|4|5











(A) entire PPIN

9|7|3|0|1|6|10|14|22|27|17|21|15|20  
1|1|4|3|1|2|5|6|6|10|2|4|6|5  
1|1|2|1|1|1|10|9|4|7|2|3|1|1|9  
3|4|6|8|3|4|4|5|7|6|6|6|2|1  
6|10|3|1|0|10|3|8|1|1|12|9|10|0|5  
5|7|10|7|8|5|0|0|8|6|1|1|1|0  
2|1|6|4|1|3|4|4|4|10|2|2|3|7  
1|1|3|5|2|0|9|4|7|10|3|2|4|3  
2|1|13|10|8|5|5|4|1|1|11|9|9|3|2  
3|1|1|1|0|2|5|4|5|5|4|4|3|5  
6|6|2|0|0|3|0|7|4|3|0|0|0|0  
0|1|2|1|0|0|8|8|4|5|1|3|3|4  
0|0|3|0|0|1|4|3|3|7|2|1|3|2  
0|0|1|0|0|0|2|1|5|5|4|4|9|7  
2|1|1|0|0|1|5|5|5|6|0|0|0|0  
2|2|2|2|0|2|1|0|6|6|3|2|7|7  
2|2|0|0|0|0|3|1|4|3|1|2|5|2  
3|1|9|7|6|0|2|1|7|6|2|2|7|5  
4|4|0|0|0|1|2|5|2|6|3|2|0|1  
0|0|3|1|1|1|1|2|2|3|3|1|4|4  
3|3|8|6|6|3|3|5|8|8|4|6|7|8  
2|3|3|1|1|3|4|6|3|4|5|3|2|1  
1|3|7|5|3|2|3|6|8|7|5|5|0|1  
5|1|6|10|7|2|0|0|1|3|0|0|6|5  
1|0|4|1|2|2|1|1|3|3|0|0|4|3  
0|0|10|8|4|0|1|2|5|7|1|2|3|6  
3|3|2|3|1|4|2|3|9|1|1|5|4|0|0  
0|0|1|0|0|1|2|2|4|3|2|3|3|3  
1|2|0|0|0|2|6|5|5|7|1|1|4|3  
2|4|9|6|3|4|2|2|10|10|4|4|9|6  
2|0|1|0|0|1|1|2|6|6|4|4|2|1  
0|0|1|0|0|0|1|2|3|8|1|0|2|0  
1|1|4|2|1|2|1|1|3|5|3|2|2|2  
1|1|0|0|0|1|1|3|5|7|1|2|9|6  
0|0|0|0|0|0|0|0|0|0|0|0|0|0  
8|5|1|1|7|0|5|6|5|16|17|4|5|15|11  
0|1|0|0|0|0|3|2|4|6|1|1|2|1  
7|1|14|10|1|2|0|0|19|26|8|7|6|3  
3|6|6|5|3|4|0|0|5|5|1|2|6|8  
1|0|2|0|0|2|1|4|5|4|3|1|7|3  
0|0|0|0|0|0|2|2|2|2|2|2|1|2  
0|0|1|0|1|0|2|3|4|4|3|1|3|4  
0|0|1|0|0|0|4|1|2|6|1|1|1|1  
3|2|4|1|0|2|0|0|5|5|1|1|4|5  
4|6|5|3|1|2|0|0|8|9|3|4|1|1  
4|4|0|0|0|1|7|7|8|8|2|3|1|3  
0|0|0|0|0|0|5|3|4|5|1|1|4|5  
1|2|3|1|0|0|4|5|3|6|3|4|4|3  
1|2|1|0|0|1|1|1|2|2|0|0|1|3  
0|0|0|0|0|0|1|1|1|4|2|2|3|2  
5|1|5|3|1|1|1|1|6|6|4|5|4|5



(A) entire PPIN

2|1|2|1|1|2|1|1|2|1|3|3|0|0  
3|3|0|0|0|0|1|2|3|5|0|0|0|0  
2|2|5|5|5|2|0|0|5|7|0|0|9|7  
2|3|3|4|0|1|4|6|4|5|5|8|1|0  
4|4|4|4|1|5|1|1|7|7|4|6|3|6  
2|2|2|0|0|2|1|2|1|2|2|2|0|0  
3|1|3|1|0|3|8|6|8|7|4|5|4|8  
2|1|6|5|1|1|0|1|9|1|1|3|1|5|4  
1|1|0|0|0|1|2|2|1|2|1|1|2|1  
0|0|0|0|0|0|0|0|0|0|0|0|0|0  
5|7|3|2|1|7|3|3|7|8|7|8|4|7  
0|0|0|0|0|0|0|0|0|0|0|0|0|0  
0|0|1|0|0|0|1|0|1|2|0|0|0|1  
1|0|0|0|0|0|1|0|1|1|1|0|0|0  
0|0|0|0|0|0|1|0|1|1|0|0|1|2  
0|0|1|0|0|0|0|0|2|2|1|0|2|2  
0|0|0|0|0|0|0|0|0|0|0|0|0|0  
2|1|6|6|4|2|0|0|2|2|2|2|1|3  
0|0|1|0|0|0|0|0|3|3|1|0|0|0  
0|0|1|0|0|0|0|0|1|2|1|1|1|1  
0|1|1|1|1|1|0|0|1|1|0|1|0|1  
1|1|6|0|0|0|1|1|4|5|1|3|2|0  
0|0|0|0|0|0|0|0|7|8|0|0|4|7  
0|0|2|6|0|0|0|0|1|1|0|1|2|1  
1|0|0|0|0|0|0|0|0|0|0|0|0|0  
0|0|0|0|0|0|0|0|0|0|0|0|0|0  
1|0|2|0|0|0|0|0|0|0|0|0|1|0  
0|0|0|0|0|0|0|0|0|0|0|0|0|0  
0|0|0|0|0|0|0|0|0|0|0|0|0|0  
0|0|0|0|0|0|0|1|0|0|0|0|1|0  
0|0|0|0|0|0|0|0|0|0|0|0|0|0  
0|0|0|0|0|0|0|0|0|0|0|0|0|0  
1|1|1|1|0|2|4|3|3|4|1|2|4|4  
0|0|0|0|0|0|0|0|0|0|0|0|0|0  
0|0|1|1|0|0|2|2|2|2|3|3|4|6  
1|1|0|1|1|1|2|1|6|7|0|0|1|0  
0|1|0|0|0|0|0|0|1|0|0|0|1|1  
0|0|0|0|0|0|0|0|0|1|0|0|0|0  
0|0|0|0|0|0|0|0|0|0|0|0|0|0  
0|0|0|0|0|0|0|0|1|0|0|0|0  
0|0|1|0|0|1|4|4|5|3|2|4|0|0  
0|0|0|0|0|0|0|0|0|0|0|0|0|0  
2|1|0|0|0|0|0|0|0|0|0|0|0|0  
0|0|0|0|0|0|0|0|0|0|0|0|0|0  
0|0|0|0|0|0|0|0|0|0|0|0|0|0  
2|0|0|0|0|0|1|1|5|2|0|1|0|0  
0|0|0|0|0|0|0|0|0|0|0|0|0|0  
0|0|0|0|0|0|0|0|6|6|0|0|0|0  
0|0|0|0|0|0|0|0|0|0|0|0|0|0  
0|0|0|0|0|0|0|0|0|0|0|0|0|0  
0|0|0|0|0|0|0|0|1|3|0|0|0|1



(A) entire PPIN

0|0|0|0|0|0|0|0|0|1|0|0|0|0|  
0|0|0|0|0|0|0|0|0|0|0|0|0|0|  
0|0|0|0|0|0|0|0|0|2|0|0|0|0|  
0|0|0|0|0|0|0|0|0|0|0|0|0|0|  
0|0|0|0|0|0|0|0|0|0|0|0|0|0|  
0|0|0|0|0|0|0|0|0|0|0|0|0|0|  
0|0|3|1|0|0|1|1|0|0|1|1|2|8|  
0|0|0|0|0|0|0|0|0|0|0|0|0|0|  
1|0|0|0|0|0|0|1|1|1|0|0|0|0|  
0|0|0|0|0|0|0|0|0|0|0|0|0|0|  
0|0|0|0|0|0|0|0|0|0|0|0|0|1|  
0|0|0|0|0|0|0|0|0|0|0|0|0|0|  
0|0|0|0|0|0|0|0|0|0|0|0|0|0|  
0|0|0|0|0|0|0|0|1|0|0|0|0|0|  
0|0|0|0|0|0|0|0|1|1|0|0|0|0|  
0|0|0|0|0|0|0|0|0|0|0|0|0|0|  
3|0|2|0|0|1|1|0|1|0|9|0|3|2|2|  
0|0|0|0|0|0|0|0|0|0|0|0|0|0|  
0|0|0|0|0|0|0|0|0|0|1|0|0|0|  
0|0|0|0|0|0|0|0|0|0|0|0|0|0|  
0|0|0|0|0|0|0|0|0|0|0|0|0|0|  
0|0|1|1|0|0|0|0|0|0|0|1|3|3|  
0|0|0|0|0|0|0|0|2|1|0|0|2|5|  
0|0|1|1|0|0|1|1|0|0|0|0|0|0|  
0|0|1|1|0|0|1|1|1|1|0|0|0|0|  
0|0|0|0|0|0|0|1|4|0|0|0|0|0|  
0|0|0|0|0|0|0|0|0|0|0|0|1|1|  
2|1|3|1|1|1|1|0|3|5|0|0|5|2|  
2|1|1|0|0|1|1|0|1|1|1|0|2|3|  
1|0|0|1|0|0|0|0|1|3|1|1|1|2|  
0|0|0|0|0|0|0|0|0|0|1|0|0|0|  
0|0|0|0|0|0|0|0|1|4|1|0|2|0|  
0|0|1|0|0|0|0|0|1|3|0|1|0|0|  
0|0|0|0|0|0|0|0|2|1|2|4|5|7|  
0|0|0|0|0|0|0|0|0|0|0|0|0|0|  
0|0|0|0|0|0|0|0|0|0|0|0|0|0|  
0|0|0|0|0|0|1|0|0|0|0|0|0|0|  
0|0|0|0|0|0|0|0|0|0|0|0|0|0|  
0|0|0|0|0|0|0|0|0|0|0|0|0|0|  
0|0|0|0|0|0|0|0|0|0|0|0|0|0|  
0|0|0|0|0|0|0|0|0|0|0|0|0|0|  
0|0|0|0|0|0|0|0|0|0|0|0|0|0|  
0|0|0|0|0|0|0|0|0|0|0|0|0|0|  
1|0|2|0|0|0|0|0|7|6|1|1|4|5|  
0|0|0|0|0|0|0|0|0|0|0|0|0|0|

(A) entire PPIN

0|0|0|0|0|0|0|0|1|0|0|0|1  
0|0|2|0|0|0|0|0|4|7|6|5|0|0  
0|0|0|0|0|0|0|0|0|0|0|0|0  
0|1|0|0|0|0|0|0|0|1|1|0|0|0  
2|1|2|1|0|0|1|1|0|2|2|3|0|0  
0|0|0|0|0|0|0|0|0|0|0|0|0  
0|0|0|0|0|0|0|0|0|0|0|0|0  
1|0|0|0|0|0|0|0|1|1|0|0|0|0  
1|1|1|0|0|1|0|0|1|2|2|1|0|0  
0|0|0|0|0|0|0|0|0|0|0|0|0  
0|0|0|0|0|0|0|0|0|0|0|0|0  
0|0|0|0|0|0|0|0|0|0|0|0|0  
0|0|0|0|0|0|0|0|0|0|0|0|0  
0|0|0|0|0|0|2|2|1|2|2|1|0|0  
0|0|0|0|0|0|0|0|0|0|0|0|0  
0|0|2|1|0|0|0|0|0|0|0|0|0  
0|0|0|0|0|0|0|0|0|0|0|0|0  
0|0|0|0|0|0|0|0|0|0|0|0|0  
0|0|0|0|0|0|0|0|2|0|0|0|1|1  
0|0|0|0|0|0|0|0|0|0|0|0|0  
0|0|0|0|0|0|0|0|0|0|0|0|0  
0|0|0|0|0|0|0|0|0|0|0|0|1|0  
0|0|1|0|0|0|0|0|0|0|0|0|0|0  
0|0|0|0|0|0|0|0|0|0|0|0|0  
0|0|0|0|0|0|0|0|0|0|0|0|0  
0|0|0|0|0|0|1|0|0|0|1|1|0|0  
0|0|0|0|0|0|0|0|0|0|0|0|0  
0|0|0|0|0|0|0|0|0|0|0|0|1|0  
0|0|0|0|0|0|0|0|0|0|0|0|0  
0|0|0|0|0|0|0|0|0|0|0|0|0  
1|0|3|0|0|0|2|1|9|9|3|4|3|2  
0|0|0|0|0|0|0|0|0|0|0|0|0  
2|2|4|2|1|1|0|0|6|5|2|3|5|5  
0|0|0|0|0|0|0|0|0|0|0|0|0  
0|0|0|0|0|0|0|0|0|0|0|0|0  
1|0|0|0|0|0|5|2|3|1|2|1|4|1  
0|0|0|0|0|0|0|0|0|0|0|0|0  
0|0|0|0|0|0|0|0|0|0|0|0|0  
3|1|0|0|0|2|1|0|3|4|0|0|4|4  
0|0|0|0|0|0|0|0|2|3|0|2|1|0  
1|0|0|0|0|0|0|0|0|1|0|0|0|0  
0|0|0|1|0|0|0|0|0|0|0|0|0  
0|0|0|0|0|0|0|0|0|0|0|0|0  
0|0|0|0|0|0|0|0|0|0|0|0|0  
0|0|0|0|0|0|0|0|0|0|0|0|0  
0|0|0|0|0|0|0|0|0|0|0|0|0  
0|0|0|0|0|0|0|0|0|0|0|0|0  
0|0|0|0|0|0|0|0|0|0|0|0|0  
0|0|1|0|0|0|0|0|0|0|0|0|1|1  
0|0|0|0|0|0|0|0|0|0|0|0|0  
0|0|0|0|0|1|0|0|4|3|0|0|0|0



(A) entire PPIN

0|0|6|0|0|0|0|0|1|0|0|0|0|0|  
0|0|5|6|4|0|4|5|6|8|0|0|3|5|  
0|0|0|0|0|0|1|0|0|0|0|0|0|0|  
0|0|0|0|0|0|0|0|0|0|0|0|0|0|  
0|0|0|0|0|0|3|2|0|1|0|0|0|0|  
0|0|0|0|0|0|5|5|4|6|0|0|5|3|  
0|0|3|4|0|0|0|0|2|2|0|0|4|2|  
0|0|0|0|0|0|0|0|0|0|0|0|0|0|  
0|0|0|0|0|0|0|0|0|1|0|0|2|2|  
0|0|0|0|0|0|0|0|0|2|0|0|1|1|  
0|0|0|0|0|0|0|0|0|0|0|0|0|0|  
0|0|0|0|0|0|4|5|3|3|0|0|2|1|  
2|0|0|0|0|0|1|1|5|2|0|1|0|0|  
0|0|0|0|0|0|1|1|1|1|1|1|0|0|  
0|0|0|0|0|0|4|3|2|3|2|2|1|1|  
0|0|2|6|0|0|0|0|1|1|0|1|2|1|  
0|0|0|1|1|0|0|0|0|0|0|0|1|0|  
0|0|0|0|0|0|2|1|1|1|0|0|1|0|  
0|0|3|1|0|0|1|1|3|2|1|2|2|1|  
0|0|0|0|0|0|0|0|0|0|0|0|0|0|  
0|0|0|0|0|0|4|1|0|1|0|2|1|0|  
0|1|2|1|0|0|8|8|4|5|1|3|3|4|  
0|0|0|0|0|0|1|2|4|5|0|2|0|2|  
2|2|0|0|0|0|3|1|4|3|1|2|5|2|  
0|0|0|0|0|0|1|1|0|3|1|0|0|2|  
0|0|1|0|0|0|1|2|3|8|1|0|2|0|  
0|0|0|0|0|0|0|0|5|8|0|0|1|0|  
0|0|0|0|0|0|5|3|4|5|1|1|4|5|  
1|0|1|2|1|1|0|0|3|3|2|2|1|1|  
0|0|1|1|0|0|0|0|1|1|0|1|3|1|  
0|0|0|0|0|0|0|0|2|1|0|0|2|5|  
1|1|1|0|0|1|1|2|1|1|1|0|0|0|  
0|0|1|1|1|0|0|0|2|3|1|1|1|0|  
1|1|6|0|0|0|1|1|4|5|1|3|2|0|  
0|1|0|1|0|1|0|0|0|0|1|2|4|0|  
1|1|3|5|2|0|9|4|7|10|3|2|4|3|  
1|0|4|3|0|0|0|1|3|3|0|0|0|0|  
1|1|2|1|1|1|10|9|4|7|2|3|11|9|  
1|1|4|2|1|2|1|1|3|5|3|2|2|2|  
1|0|4|1|2|2|1|1|3|3|0|0|4|3|  
0|0|2|2|1|1|6|3|2|2|1|1|1|1|  
3|1|0|0|0|2|1|0|3|4|0|0|4|4|  
0|0|0|0|0|0|2|1|3|6|0|0|0|1|  
0|0|0|0|0|0|1|1|5|6|0|0|1|2|  
0|0|0|0|0|0|1|2|2|4|0|0|1|3|  
1|0|0|1|0|0|0|0|1|3|1|1|1|2|  
19|1|20|3|23|4|24|3|20|8|17|3|22|7|26|3|24|9|25|0|25|7|22|5|21|7|  
20|28|32|4|1|47|26|19|21|63|55|24|27|51|45|  
22|31|47|47|47|25|23|26|44|50|30|37|22|15|  
9|7|15|8|11|10|21|22|30|35|26|26|43|38|  
13|18|15|11|7|18|37|36|33|40|23|28|28|38|

(A) entire PPIN

7|8|9|12|12|7|18|16|33|29|14|14|28|24  
5|4|8|7|7|4|16|13|21|22|9|12|18|19  
12|18|29|29|19|17|19|23|30|31|29|27|0|0  
10|9|18|16|7|7|12|12|24|29|6|7|22|22  
1|1|4|3|1|2|5|6|6|10|2|4|6|5  
10|9|9|6|2|13|16|10|15|20|36|36|17|15  
1|5|3|3|1|3|8|6|10|16|3|5|11|11  
1|1|12|9|13|10|12|7|10|13|14|10|10|3|1  
3|6|6|5|3|4|0|0|5|5|1|2|6|8  
10|11|13|15|7|11|6|9|23|23|14|11|1|0  
0|0|1|0|0|0|2|1|5|5|4|4|9|7  
8|10|7|3|1|9|11|8|19|16|7|5|6|8  
12|11|12|11|8|19|1|6|46|50|13|12|0|0  
2|2|5|5|5|2|0|0|5|7|0|0|9|7  
5|7|10|7|8|5|0|0|8|6|1|1|1|0  
4|4|0|0|0|1|7|7|8|8|2|3|1|3  
8|5|1|1|7|0|5|6|5|16|17|4|5|15|11  
3|4|6|8|3|4|4|5|7|6|6|6|2|1  
4|4|4|4|1|5|1|1|7|7|4|6|3|6  
3|3|2|3|1|4|2|3|9|11|5|4|0|0  
0|0|1|0|1|0|2|3|4|4|3|1|3|4  
1|2|3|1|0|0|4|5|3|6|3|4|4|3  
3|1|1|1|0|2|5|4|5|5|4|4|3|5  
2|0|1|0|0|1|1|2|6|6|4|4|2|1  
2|1|6|6|4|2|0|0|2|2|2|2|1|3  
1|2|0|0|0|2|6|5|5|7|1|1|4|3  
2|1|13|10|8|5|5|4|1|1|1|9|9|3|2  
5|1|6|10|7|2|0|0|1|3|0|0|6|5  
3|3|8|6|6|3|3|5|8|8|4|6|7|8  
2|1|6|4|1|3|4|4|4|10|2|2|3|7  
2|0|4|4|2|1|1|0|3|3|2|1|1|1  
4|2|5|3|1|2|1|0|4|7|1|0|3|1  
0|0|3|1|1|1|1|2|2|3|3|1|4|4  
6|10|3|1|0|10|3|8|11|12|9|10|0|5  
5|1|5|3|1|1|1|1|6|6|4|5|4|5  
0|0|3|0|0|1|4|3|3|7|2|1|3|2  
3|2|4|1|0|2|0|0|5|5|1|1|4|5  
2|1|6|5|1|1|0|1|9|11|3|1|5|4  
1|3|7|5|3|2|3|6|8|7|5|5|0|1  
2|4|9|6|3|4|2|2|10|10|4|4|9|6  
2|1|3|1|1|1|1|0|3|5|0|0|5|2  
1|0|2|4|2|2|0|0|3|3|2|1|2|3  
0|0|0|0|0|0|2|2|2|2|2|2|1|2  
0|0|3|0|0|0|2|1|6|3|3|2|3  
2|2|4|2|1|1|0|0|6|5|2|3|5|5  
5|7|3|2|1|7|3|3|7|8|7|8|4|7  
2|2|2|2|0|2|1|0|6|6|3|2|7|7  
1|1|1|1|0|2|4|3|3|4|1|2|4|4  
1|0|0|0|0|0|5|2|3|1|2|1|4|1  
1|1|0|1|1|1|2|1|6|7|0|0|1|0  
1|1|0|0|0|1|2|2|1|2|1|1|2|1

(A) entire PPIN

0|0|0|0|0|0|0|6|8|0|0|0|1  
1|0|5|2|0|2|3|0|5|7|1|1|2|1  
0|0|5|5|2|0|0|0|4|4|3|1|0|0  
2|3|3|1|1|3|4|6|3|4|5|3|2|1  
3|1|3|1|0|3|8|6|8|7|4|5|4|8  
0|0|9|8|3|1|1|0|1|1|0|0|5|9  
0|0|0|0|0|0|0|0|0|0|0|0|0|0  
7|1|14|10|1|2|0|0|19|26|8|7|6|3  
0|0|2|0|0|0|0|0|2|0|0|0|0|0|0  
5|9|6|1|1|7|4|8|9|8|2|2|2|5  
2|8|2|3|0|0|2|14|4|2|0|0|0|0  
1|0|0|0|0|0|1|0|1|1|1|0|0|0|0  
0|0|0|0|0|0|0|0|1|1|0|0|1|1|1  
0|0|0|0|0|0|1|0|1|1|0|0|1|2  
0|0|3|0|0|0|3|1|2|1|3|1|1|1|1  
0|0|7|3|0|1|0|0|6|13|0|0|0|0|0  
0|1|1|1|1|1|0|0|1|1|0|1|0|1|1  
0|0|1|1|0|0|1|1|1|1|0|0|0|0|0  
0|0|0|0|0|0|0|0|0|0|0|0|0|0|0  
0|0|0|0|0|0|2|2|1|2|0|0|1|1|1  
1|2|1|0|0|1|1|1|2|2|0|0|1|3|3  
0|0|5|6|1|0|0|0|2|2|0|0|0|0|0  
1|0|0|0|0|0|0|0|1|0|0|0|0|1|1  
18|26|21|25|9|3|1|1|2|1|0|3|2|5|6  
3|1|9|7|6|0|2|1|7|6|2|2|7|5|5  
1|0|3|0|0|0|2|1|9|9|3|4|3|2|2  
3|3|0|0|0|0|1|2|3|5|0|0|0|0|0  
0|0|0|0|0|0|0|0|0|1|0|0|0|0|0  
0|1|0|0|0|1|0|0|3|3|0|0|2|2|2  
1|0|0|0|0|1|0|0|0|0|0|0|1|1|1  
2|1|0|0|0|0|0|0|0|0|0|0|0|0|0  
0|0|0|0|1|0|0|0|0|0|0|0|3|0|0  
0|0|1|1|0|0|0|0|1|1|0|0|0|0|0  
0|0|0|0|0|0|0|0|1|0|0|0|0|0|0  
0|0|1|0|0|0|1|0|1|2|0|0|0|1|1  
4|6|5|3|1|2|0|0|8|9|3|4|1|1|1  
0|0|0|0|0|0|0|0|0|0|0|0|0|0|1  
0|0|1|1|0|0|0|0|0|0|0|0|0|0|0  
0|0|0|0|0|0|0|0|0|0|0|1|0|0|0  
0|0|3|1|0|0|1|1|0|0|1|1|2|8|8  
0|0|0|0|0|0|0|0|1|0|8|10|0|0|0  
0|0|0|0|0|0|0|0|1|1|0|0|0|0|0  
0|0|0|0|0|0|0|0|3|4|0|0|4|3|3  
1|1|0|0|0|1|1|1|1|1|1|1|0|0|0  
2|1|1|0|0|1|1|0|1|1|1|0|2|3|3  
0|0|0|0|0|0|0|0|0|0|0|0|0|0|0  
0|0|0|0|0|0|2|1|2|3|0|0|1|0|0  
0|0|1|0|0|0|0|0|0|0|0|0|0|0|0  
0|0|0|0|0|0|0|0|0|0|0|0|1|2|2  
0|0|0|0|0|0|0|0|0|1|1|0|0|0|0  
1|1|0|0|0|0|0|0|0|0|0|0|0|0|0





(A) entire PPIN

0|0|0|0|0|0|0|0|0|0|0|1  
0|0|1|0|0|0|0|0|2|0|0|0|0  
0|0|0|0|0|0|1|0|0|0|0|1|0  
0|0|1|0|0|0|2|0|1|1|1|1|1|0  
0|0|0|0|0|0|0|0|0|0|0|0|0  
0|0|1|0|0|0|0|0|1|2|1|1|1|1|1  
0|0|1|0|0|0|0|0|0|0|0|1|1|1  
0|0|0|0|0|0|0|0|0|0|0|0|0|0  
0|0|0|0|0|0|0|0|0|0|0|0|0|0  
0|0|0|0|0|0|0|0|0|0|0|0|0|0  
0|0|0|0|0|0|0|0|0|2|2|0|0|0|0  
0|0|0|0|0|0|0|0|0|0|0|0|0|0  
0|0|0|0|0|0|0|0|1|2|0|1|2|3  
0|0|0|0|0|0|0|0|0|0|0|0|0|0  
0|0|0|0|0|0|0|0|0|0|0|0|0|0  
0|0|0|0|0|0|0|0|0|0|0|0|0|0  
0|0|0|0|0|0|0|0|0|0|0|0|0|0  
0|0|0|0|0|0|0|0|0|0|0|1|1|1  
0|0|0|0|0|0|0|0|1|2|0|0|0|0|0  
0|0|0|0|0|0|0|0|1|1|0|0|1|0|0  
0|0|0|0|0|0|0|0|0|0|0|0|0|0|0  
0|0|0|0|0|0|0|0|0|0|0|0|0|0|0  
0|0|0|0|0|0|0|0|2|1|2|4|5|7  
0|0|0|0|0|0|0|0|0|0|0|0|0|0|0  
0|0|0|0|0|0|0|0|0|0|0|0|0|0|0  
0|0|0|0|0|0|0|0|0|0|0|0|0|0|0  
0|0|0|0|0|0|0|0|0|0|0|0|0|0|0  
0|0|0|0|0|0|0|0|0|0|0|0|0|0|0  
0|0|0|0|0|0|0|0|0|0|0|0|0|0|0  
0|0|0|0|0|0|0|0|0|0|0|0|0|0|0  
0|0|0|0|0|0|0|0|0|0|0|0|0|0|0  
0|0|0|0|0|0|0|0|0|0|0|0|0|0|0  
0|0|0|0|0|0|0|0|0|0|0|0|0|0|0  
0|0|0|0|0|0|0|0|0|0|0|0|0|0|0  
0|0|0|0|0|0|0|0|0|0|0|0|0|0|0  
0|0|0|0|0|0|0|0|0|0|0|0|0|0|0  
0|0|0|0|0|0|0|0|0|0|0|0|0|0|0  
0|0|0|0|0|0|0|0|0|0|0|0|0|0|0  
0|0|0|0|0|0|0|0|0|0|0|0|0|0|0  
0|0|0|0|0|0|0|0|0|0|0|0|0|0|0  
0|0|0|0|0|0|0|0|0|0|0|0|0|0|0  
0|0|0|0|0|0|0|0|0|0|0|0|0|0|0  
0|0|0|0|0|0|0|0|0|0|0|0|0|0|0  
0|0|0|0|0|0|0|0|0|0|0|0|0|0|0  
9|7|3|0|1|6|10|14|22|27|17|21|15|20  
0|0|0|0|0|0|1|1|2|1|0|0|0|0|0

(A) entire PPIN

1|0|1|1|0|0|1|0|1|2|0|0|1|1|  
0|0|1|0|0|0|0|0|0|0|0|0|1|  
0|0|0|0|0|0|0|0|0|0|0|0|0|  
0|0|3|1|1|0|0|0|0|0|1|1|5|2|  
0|0|0|0|0|0|0|0|0|0|0|0|0|  
0|0|0|0|0|0|0|0|0|0|0|0|0|  
0|0|0|0|0|0|0|0|0|0|0|0|0|  
0|0|0|0|0|0|0|0|0|0|0|0|0|  
0|0|0|0|0|0|0|0|0|0|0|0|0|  
0|0|0|0|0|0|0|0|0|0|0|0|0|  
0|0|0|0|0|0|0|0|0|0|0|0|0|  
0|0|0|0|0|0|0|0|0|0|0|0|0|  
0|0|0|0|0|0|0|0|0|0|0|0|0|  
0|0|0|0|0|0|0|0|0|0|0|0|1|0|  
0|0|0|0|0|0|0|0|0|0|0|0|0|0|  
0|0|0|0|0|0|0|0|0|1|2|1|1|0|1|  
0|0|0|0|0|0|0|0|0|0|0|0|0|0|  
0|0|1|0|0|0|0|0|0|0|0|0|0|0|  
0|0|1|0|0|0|1|0|0|0|0|0|0|0|  
0|0|0|0|0|0|0|0|0|0|0|0|0|0|  
0|0|0|0|0|0|0|0|0|0|0|0|0|0|  
0|0|0|0|0|0|0|0|0|0|0|0|0|0|  
0|0|0|0|0|0|0|0|0|0|0|0|0|0|  
0|0|0|0|0|0|0|0|0|0|0|0|0|0|  
0|0|0|0|0|0|0|0|0|0|0|0|0|0|  
0|0|0|0|0|0|0|0|0|0|0|0|0|0|  
0|0|0|0|0|0|0|0|0|0|0|0|0|0|  
0|0|0|0|0|0|0|0|0|0|0|0|0|0|  
0|0|0|0|0|0|0|0|0|0|0|0|0|0|  
0|0|0|0|0|0|0|0|0|0|0|0|0|0|  
0|0|0|0|0|0|0|0|0|0|0|0|0|0|  
0|0|0|0|0|0|0|0|0|0|0|0|0|0|  
0|0|0|0|0|0|0|0|0|0|0|0|0|0|  
0|0|0|0|0|0|0|0|0|0|0|0|0|0|  
0|0|0|0|0|0|0|0|0|0|0|0|0|0|  
0|0|0|0|0|0|0|0|0|0|0|0|0|0|  
0|0|0|0|0|0|0|0|0|0|0|0|0|0|  
0|0|0|0|0|0|0|0|0|0|0|0|0|0|  
0|0|0|0|0|0|0|0|0|0|0|0|0|0|  
0|0|0|0|0|0|0|0|0|0|0|0|0|0|  
0|0|0|0|0|0|0|0|0|0|0|0|0|0|  
0|0|0|0|0|0|0|0|0|0|0|0|0|0|  
0|0|0|0|0|0|0|0|0|0|0|0|0|0|  
0|0|0|0|0|0|0|0|0|0|0|0|0|0|  
0|0|3|5|2|0|0|0|1|3|0|0|0|0|  
0|0|1|1|0|0|0|0|0|0|0|0|0|0|

(A) entire PPIN

0|0|1|0|0|0|0|0|3|3|1|0|0|0|  
0|0|0|0|0|0|0|0|0|0|0|0|0|0|0|  
0|0|5|6|1|0|0|0|2|2|0|0|0|0|  
0|0|0|0|0|0|0|0|0|0|0|0|0|0|0|  
0|0|1|0|0|0|0|0|3|2|1|1|0|0|  
0|0|1|0|0|0|0|0|0|0|0|0|0|0|0|  
0|0|0|0|0|0|0|0|0|0|0|0|0|0|0|  
0|0|1|1|0|0|0|0|0|0|0|0|0|0|0|  
0|0|0|0|0|0|0|0|0|1|0|2|0|0|0|  
0|0|0|0|0|0|0|0|0|0|0|0|0|0|0|  
0|0|1|2|1|0|0|0|0|0|0|0|0|0|0|  
0|0|1|0|0|0|0|0|1|0|0|0|0|0|0|  
1|0|0|0|0|0|0|0|0|0|1|0|0|0|0|  
0|0|0|0|0|0|0|0|2|3|0|2|1|0|  
0|0|0|1|0|0|0|0|1|3|0|0|0|0|  
0|0|0|0|0|0|0|0|0|0|0|0|0|0|0|  
0|0|0|0|0|0|0|0|0|0|0|0|0|0|0|  
0|0|0|0|0|0|0|0|0|0|0|0|0|0|0|  
0|0|0|0|0|0|0|0|0|0|0|0|0|0|0|  
0|0|0|0|0|0|0|0|2|2|0|0|0|0|  
0|0|0|0|0|0|0|0|0|0|1|0|0|0|0|  
0|0|0|0|0|0|1|1|2|1|0|0|0|0|0|  
0|0|0|0|0|0|0|0|0|0|0|0|0|0|0|  
0|0|3|1|0|0|0|0|0|1|0|0|0|0|0|  
0|0|0|0|0|0|0|0|0|0|0|0|0|0|0|  
0|1|3|5|2|1|0|0|3|5|0|0|0|0|0|  
0|0|0|0|0|0|0|0|0|0|1|0|0|0|0|  
0|0|2|1|0|0|0|1|1|1|0|0|0|0|0|  
0|0|0|0|0|0|0|0|0|0|0|0|1|0|0|  
0|0|0|0|0|0|0|0|0|0|0|0|0|0|0|  
0|0|0|0|0|0|0|0|1|3|0|0|0|1|  
0|0|0|0|0|0|0|0|1|0|0|0|0|0|0|  
0|0|0|0|0|0|0|0|1|0|0|0|0|0|0|  
0|0|0|0|0|0|0|0|0|0|0|0|0|0|0|  
1|0|2|1|0|0|0|0|2|2|2|1|0|0|  
0|0|0|0|0|0|0|0|0|1|1|0|0|1|0|  
0|0|1|0|0|0|0|0|0|0|1|0|0|0|0|  
0|0|0|0|0|0|0|0|0|1|1|0|0|0|0|  
0|0|0|0|0|0|0|0|2|5|0|0|0|0|0|  
0|0|0|0|0|0|0|0|0|0|0|0|0|0|0|  
0|0|0|0|0|0|3|2|0|1|0|0|0|0|0|  
0|0|0|0|0|0|0|0|0|0|0|0|0|0|0|  
0|0|0|0|0|0|0|0|0|0|0|0|0|0|0|  
0|0|1|0|0|0|0|0|1|2|1|1|1|1|1|  
0|0|1|0|0|0|0|0|0|0|0|0|0|0|0|  
0|0|0|0|0|0|0|0|2|3|2|1|1|0|  
0|0|4|1|1|0|1|0|4|6|2|6|0|0|0|  
0|0|0|0|0|0|2|1|2|2|0|0|0|1|  
0|0|0|0|0|0|2|1|1|1|0|0|1|0|  
0|0|0|0|0|0|0|0|2|1|0|0|0|0|  
0|0|0|0|0|0|0|0|0|0|0|1|0|0|





(A) entire PPIN

1|1|0|0|0|1|2|2|1|2|1|1|2|1  
2|1|1|0|0|1|1|0|1|1|1|0|2|3  
1|0|0|0|0|0|0|0|3|6|0|1|0|1  
2|0|0|0|0|0|1|1|5|2|0|1|0|0  
19|1|203|234|243|208|173|227|263|249|250|257|225|21|7  
13|18|15|11|7|18|37|36|33|40|23|28|28|38  
10|9|9|6|2|13|16|10|15|20|36|36|17|15  
20|28|32|41|47|26|19|21|63|55|24|27|51|45  
9|7|15|8|11|10|21|22|30|35|26|26|43|38  
22|31|47|47|47|25|23|26|44|50|30|37|22|15  
7|8|9|12|12|7|18|16|33|29|14|14|28|24  
9|7|3|0|1|6|10|14|22|27|17|21|15|20  
2|4|9|6|3|4|2|2|10|10|4|4|9|6  
8|5|11|7|0|5|6|5|16|17|4|5|15|11  
5|4|8|7|7|4|16|13|21|22|9|12|18|19  
1|5|3|3|1|3|8|6|10|16|3|5|11|11  
10|9|18|16|7|7|12|12|24|29|6|7|22|22  
2|1|6|5|1|1|0|1|9|11|3|1|5|4  
18|26|21|25|9|31|1|2|1|0|3|2|5|6  
3|3|8|6|6|3|3|5|8|8|4|6|7|8  
11|12|9|13|10|12|7|10|13|14|10|10|3|1  
3|6|6|5|3|4|0|0|5|5|1|2|6|8  
1|1|2|1|1|1|10|9|4|7|2|3|11|9  
4|4|0|0|0|1|7|7|8|8|2|3|1|3  
5|9|6|1|1|7|4|8|9|8|2|2|2|5  
4|6|5|3|1|2|0|0|8|9|3|4|1|1  
12|11|12|11|8|19|1|6|46|50|13|12|0|0  
0|1|2|1|0|0|8|8|4|5|1|3|3|4  
3|1|1|1|0|2|5|4|5|5|4|4|3|5  
8|10|7|3|1|9|11|8|19|16|7|5|6|8  
1|1|4|3|1|2|5|6|6|10|2|4|6|5  
6|10|3|1|0|10|3|8|11|12|9|10|0|5  
0|0|1|0|0|0|2|1|5|5|4|4|9|7  
0|0|0|0|0|0|6|6|7|8|0|1|10|14  
4|4|4|4|1|5|1|1|7|7|4|6|3|6  
10|11|13|15|7|11|6|9|23|23|14|11|1|0  
2|2|4|2|1|1|0|0|6|5|2|3|5|5  
3|2|4|1|0|2|0|0|5|5|1|1|4|5  
5|7|3|2|1|7|3|3|7|8|7|8|4|7  
3|4|6|8|3|4|4|5|7|6|6|6|2|1  
0|0|5|6|4|0|4|5|6|8|0|0|3|5  
12|18|29|29|19|17|19|23|30|31|29|27|0|0  
1|2|0|0|0|2|6|5|5|7|1|1|4|3  
1|0|3|0|0|0|2|1|9|9|3|4|3|2  
0|0|9|8|3|1|1|0|1|1|0|0|5|9  
1|0|4|1|2|2|1|1|3|3|0|0|4|3  
0|0|7|3|0|1|0|0|6|13|0|0|0|0  
1|0|5|2|0|2|3|0|5|7|1|1|2|1  
1|0|2|0|0|2|1|4|5|4|3|1|7|3  
0|0|3|1|1|1|1|2|2|3|3|1|4|4  
1|1|0|1|1|1|2|1|6|7|0|0|1|0

(A) entire PPIN

0|0|5|5|2|0|0|0|4|4|3|1|0|0  
1|1|3|5|2|0|9|4|7|10|3|2|4|3  
2|1|1|3|10|8|5|5|4|1|1|1|9|9|3|2  
3|3|0|0|0|1|1|1|2|3|1|2|1|1  
0|0|0|0|0|0|5|5|4|6|0|0|5|3  
2|1|3|1|1|1|1|0|3|5|0|0|5|2  
0|0|0|0|0|0|5|3|4|5|1|1|4|5  
2|2|0|0|0|0|3|1|4|3|1|2|5|2  
2|1|1|0|0|1|5|5|5|6|0|0|0|0  
0|0|1|0|0|0|1|2|3|8|1|0|2|0  
1|1|4|2|1|2|1|1|3|5|3|2|2|2  
2|1|6|4|1|3|4|4|4|10|2|2|3|7  
5|1|5|3|1|1|1|1|6|6|4|5|4|5  
1|0|0|0|0|0|5|2|3|1|2|1|4|1  
0|0|0|0|0|0|4|3|2|3|2|2|1|1  
0|0|1|0|1|0|2|3|4|4|3|1|3|4  
0|0|1|0|0|0|4|1|2|6|1|1|1|1  
0|1|0|0|0|0|3|2|4|6|1|1|2|1  
2|3|1|0|0|4|0|0|5|4|3|3|1|1  
7|1|14|10|1|2|0|0|19|26|8|7|6|3  
0|0|1|0|0|1|2|2|4|3|2|3|3|3  
0|0|2|2|1|1|6|3|2|2|1|1|1|1  
0|0|2|0|0|0|0|0|4|7|6|5|0|0  
0|0|3|0|0|1|4|3|3|7|2|1|3|2  
0|0|1|0|0|0|0|0|0|0|0|0|0|0  
0|0|0|0|0|0|0|0|0|0|0|0|0|0  
1|1|0|0|0|0|0|0|1|0|1|1|1|1  
0|0|0|0|0|0|1|0|0|0|0|0|0|0  
3|3|2|3|1|4|2|3|9|1|1|5|4|0|0  
0|0|0|0|0|0|0|0|0|0|0|0|0|0  
2|8|2|3|0|0|2|14|4|2|0|0|0|0  
0|0|0|0|0|0|0|0|1|1|0|0|1|1  
0|0|0|0|0|0|0|0|0|0|0|0|0|0  
0|0|0|0|0|1|0|0|0|0|0|0|0|0  
2|3|3|4|0|1|4|6|4|5|5|8|1|0  
0|0|0|0|0|0|0|0|0|0|0|0|0|0  
0|0|0|0|0|0|0|0|0|0|0|0|0|0  
0|0|0|0|0|0|4|5|3|3|0|0|2|1  
0|0|0|0|0|0|0|0|0|0|0|0|0|0  
0|0|0|0|0|0|0|0|0|0|0|0|0|0  
0|0|0|0|0|0|0|0|1|1|0|0|0|0  
0|0|0|0|0|0|0|0|0|0|0|0|0|0  
2|2|2|2|0|2|1|0|6|6|3|2|7|7  
0|0|0|0|0|0|0|0|0|0|0|0|0|0  
0|0|0|0|0|0|0|0|0|0|0|0|0|0  
0|0|0|0|0|0|0|0|1|0|0|0|1  
0|0|0|0|0|0|2|1|3|3|0|0|2|1  
0|0|0|0|0|0|0|0|1|1|0|0|0|0  
12|0|6|0|0|0|0|0|0|0|1|0|1|2  
0|0|0|0|0|0|0|0|0|0|0|0|0|0  
0|0|0|0|0|0|0|0|0|0|0|0|0|0















(A) entire PPIN

1|0|0|0|0|0|0|0|0|1|0|0|0|0|  
0|0|1|0|0|0|0|0|0|2|0|0|0|0|  
0|0|3|1|0|0|1|1|0|0|1|1|2|8|  
0|0|1|0|0|0|2|0|1|1|1|1|1|0|  
0|0|1|0|0|0|0|0|0|0|0|0|0|0|  
0|0|0|0|0|0|0|0|0|0|2|1|0|0|  
0|0|0|0|0|0|0|0|0|1|0|0|0|1|  
0|0|0|0|0|0|0|0|0|0|0|0|0|0|  
0|0|0|0|0|0|0|0|0|0|0|0|0|0|  
0|0|0|0|0|0|0|0|0|0|0|0|0|0|  
0|0|0|0|0|0|0|0|2|2|0|0|0|0|  
0|0|0|0|0|0|0|0|0|2|0|0|0|0|  
0|0|3|0|0|0|3|1|2|1|3|1|1|1|  
0|0|1|0|0|0|0|0|0|0|0|0|0|0|  
0|0|1|0|0|0|0|0|0|0|0|0|1|1|  
0|0|1|0|0|1|0|0|2|3|0|1|4|1|  
0|0|1|1|0|0|0|0|0|0|0|0|0|0|  
0|0|1|0|0|0|0|0|0|0|0|0|0|0|  
0|0|1|0|0|0|0|0|0|2|0|0|0|0|  
0|0|0|0|0|0|0|0|0|0|0|0|0|1|  
0|0|1|1|0|0|0|0|1|2|0|0|0|1|  
0|0|0|0|0|0|0|0|1|2|0|1|2|3|  
0|0|0|0|0|0|0|0|1|0|0|0|0|0|  
1|1|1|0|0|1|1|2|1|1|1|0|0|0|  
0|0|0|0|0|0|0|0|0|0|0|0|0|0|  
3|1|0|0|0|2|1|0|3|4|0|0|4|4|  
0|0|0|0|0|0|0|0|0|0|0|0|0|0|  
1|0|1|0|0|2|0|0|1|1|0|0|0|1|  
0|0|0|0|0|0|0|0|4|3|1|2|0|0|  
0|0|0|0|0|0|0|0|2|5|0|0|0|0|  
0|0|3|0|0|0|0|2|1|6|3|3|2|3|  
0|0|1|0|0|0|1|2|3|8|1|0|2|0|  
1|1|6|0|0|0|1|1|4|5|1|3|2|0|  
0|0|0|0|0|0|0|0|0|0|0|0|0|0|  
0|0|5|5|2|0|0|0|4|4|3|1|0|0|  
0|0|0|0|0|0|0|0|0|0|0|0|0|0|  
0|0|0|0|0|0|2|1|2|2|0|0|0|1|  
0|0|1|0|0|1|4|4|5|3|2|4|0|0|  
0|1|0|0|0|1|0|0|3|3|0|0|2|2|  
0|0|0|0|0|0|0|0|0|0|0|0|0|0|  
0|0|1|1|0|0|9|5|1|2|0|1|4|4|  
1|0|0|0|0|0|0|0|3|6|0|1|0|1|  
0|0|0|0|0|1|0|0|4|3|0|0|0|0|  
0|0|0|0|0|0|0|0|0|0|0|0|0|0|  
0|0|1|0|0|0|0|0|2|2|1|0|2|2|  
0|0|2|1|1|0|1|0|2|2|0|0|0|0|  
0|0|3|1|0|0|1|1|3|2|1|2|2|1|  
0|0|1|1|1|0|0|0|2|3|1|1|1|0|  
0|0|1|1|0|0|0|0|1|1|0|1|3|1|  
0|0|3|1|1|0|0|0|0|0|1|1|5|2|  
0|0|3|4|0|0|0|0|2|2|0|0|4|2|

(A) entire PPIN

1|1|0|1|1|1|2|1|6|7|0|0|1|0  
4|2|5|3|1|2|1|0|4|7|1|0|3|1  
0|0|0|0|0|0|1|2|4|5|0|2|0|2  
3|3|0|0|0|1|1|1|2|3|1|2|1|1  
5|9|6|1|1|7|4|8|9|8|2|2|2|5  
2|1|6|4|1|3|4|4|4|10|2|2|3|7  
3|0|2|0|0|1|1|0|10|9|0|3|2|2  
3|2|4|1|0|2|0|0|5|5|1|1|4|5  
2|1|2|1|1|2|1|1|2|1|3|3|0|0  
0|1|0|0|0|0|3|2|4|6|1|1|2|1  
0|0|1|0|0|0|2|1|2|3|2|3|2|1  
0|0|2|6|0|0|0|0|1|1|0|1|2|1  
0|0|0|0|0|0|0|0|6|6|0|0|0|0  
19|1|20|3|23|4|24|3|208|173|227|263|249|250|257|225|21|7  
20|28|32|41|47|26|19|21|63|55|24|27|51|45  
22|31|47|47|47|25|23|26|44|50|30|37|22|15  
9|7|15|8|11|10|21|22|30|35|26|26|43|38  
10|9|9|6|2|13|16|10|15|20|36|36|17|15  
10|9|18|16|7|7|12|12|24|29|6|7|22|22  
12|11|12|11|8|19|1|6|46|50|13|12|0|0  
12|18|29|29|19|17|19|23|30|31|29|27|0|0  
7|8|9|12|12|7|18|16|33|29|14|14|28|24  
13|18|15|11|7|18|37|36|33|40|23|28|28|38  
5|4|8|7|7|4|16|13|21|22|9|12|18|19  
10|11|13|15|7|11|6|9|23|23|14|11|1|0  
8|5|11|7|0|5|6|5|16|17|4|5|15|11  
6|10|3|1|0|10|3|8|11|12|9|10|0|5  
7|1|14|10|1|2|0|0|19|26|8|7|6|3  
2|1|13|10|8|5|5|4|1|1|11|9|9|3|2  
1|1|4|3|1|2|5|6|6|10|2|4|6|5  
11|12|9|13|10|12|7|10|13|14|10|10|3|1  
3|1|3|1|0|3|8|6|8|7|4|5|4|8  
2|4|9|6|3|4|2|2|10|10|4|4|9|6  
3|6|6|5|3|4|0|0|5|5|1|2|6|8  
3|3|2|3|1|4|2|3|9|11|5|4|0|0  
1|3|7|5|3|2|3|6|8|7|5|5|0|1  
1|5|3|3|1|3|8|6|10|16|3|5|11|11  
9|7|3|0|1|6|10|14|22|27|17|21|15|20  
2|1|6|5|1|1|0|1|9|11|3|1|5|4  
0|0|10|8|4|0|1|2|5|7|1|2|3|6  
0|0|0|0|0|0|6|6|7|8|0|1|10|14  
4|4|4|4|1|5|1|1|7|7|4|6|3|6  
0|0|5|6|4|0|4|5|6|8|0|0|3|5  
1|1|4|2|1|2|1|1|3|5|3|2|2|2  
5|7|3|2|1|7|3|3|7|8|7|8|4|7  
0|0|1|0|0|0|2|1|5|5|4|4|9|7  
1|0|5|2|0|2|3|0|5|7|1|1|2|1  
1|2|3|1|0|0|4|5|3|6|3|4|4|3  
3|4|6|8|3|4|4|5|7|6|6|6|2|1  
2|2|4|2|1|1|0|0|6|5|2|3|5|5  
0|0|9|8|3|1|1|0|1|1|0|0|5|9



(A) entire PPIN

1|0|2|0|0|0|0|7|6|1|1|4|5  
2|2|5|5|5|2|0|0|5|7|0|0|9|7  
2|0|4|4|2|1|1|0|3|3|2|1|1|1  
2|0|1|0|0|1|1|2|6|6|4|4|2|1  
0|0|0|0|0|0|5|5|4|6|0|0|5|3  
3|3|8|6|6|3|3|5|8|8|4|6|7|8  
2|1|6|6|4|2|0|0|2|2|2|2|1|3  
5|1|6|10|7|2|0|0|1|3|0|0|6|5  
2|3|3|4|0|1|4|6|4|5|5|8|1|0  
4|4|0|0|0|1|7|7|8|8|2|3|1|3  
5|7|10|7|8|5|0|0|8|6|1|1|1|0  
3|1|9|7|6|0|2|1|7|6|2|2|7|5  
3|1|1|1|0|2|5|4|5|5|4|4|3|5  
1|1|1|1|0|2|4|3|3|4|1|2|4|4  
8|10|7|3|1|9|11|8|19|16|7|5|6|8  
0|0|1|0|0|1|2|2|4|3|2|3|3|3  
0|0|2|2|1|1|6|3|2|2|1|1|1|1  
1|1|3|5|2|0|9|4|7|10|3|2|4|3  
1|0|4|1|2|2|1|1|3|3|0|0|4|3  
2|1|1|0|0|1|5|5|5|6|0|0|0|0  
0|0|3|1|1|1|1|2|2|3|3|1|4|4  
0|0|1|0|1|0|2|3|4|4|3|1|3|4  
5|1|5|3|1|1|1|1|6|6|4|5|4|5  
1|2|0|0|0|2|6|5|5|7|1|1|4|3  
0|0|3|0|0|1|4|3|3|7|2|1|3|2  
0|0|0|0|0|0|0|0|0|0|2|24|11  
1|0|0|0|0|0|5|2|3|1|2|1|4|1  
1|0|2|4|2|2|0|0|3|3|2|1|2|3  
2|3|3|1|1|3|4|6|3|4|5|3|2|1  
2|1|3|1|1|1|1|0|3|5|0|0|5|2  
0|1|2|1|0|0|8|8|4|5|1|3|3|4  
0|0|0|0|0|0|5|3|4|5|1|1|4|5  
2|2|2|0|0|2|1|2|1|2|2|2|0|0  
2|1|5|6|2|2|0|0|5|4|1|1|2|1  
0|0|0|2|0|1|0|1|1|3|0|0|14|8  
0|0|0|0|0|0|4|3|2|3|2|2|1|1  
0|0|0|0|0|0|0|0|0|0|0|0|0|0  
1|0|3|1|1|0|0|0|3|5|2|2|2|2  
2|8|2|3|0|0|2|14|4|2|0|0|0|0  
4|6|5|3|1|2|0|0|8|9|3|4|1|1  
0|0|0|0|0|0|4|5|3|3|0|0|2|1  
0|0|0|0|0|0|1|1|1|4|2|2|3|2  
1|1|2|1|1|1|10|9|4|7|2|3|11|9  
1|1|0|0|0|1|2|2|1|2|1|1|2|1  
0|0|0|0|0|0|2|2|2|2|2|2|1|2  
0|0|2|0|0|0|0|0|4|7|6|5|0|0  
0|0|0|0|0|0|0|0|0|1|0|0|1|0  
1|2|1|0|0|1|1|1|2|2|0|0|1|3  
0|0|1|0|0|0|4|1|2|6|1|1|1|1  
3|3|0|0|0|0|1|2|3|5|0|0|0|0  
2|3|1|0|0|4|0|0|5|4|3|3|1|1



(A) entire PPIN

1|0|1|1|0|0|1|0|1|2|0|0|1|1|  
0|0|2|1|0|0|0|0|0|0|0|0|0|0|  
0|0|0|0|0|0|0|0|0|0|0|0|0|0|  
0|0|0|0|0|0|0|0|0|0|0|0|0|1|  
0|0|0|0|0|0|0|0|0|0|0|0|1|0|  
0|0|0|0|0|0|1|0|0|0|0|0|0|0|  
0|0|0|0|0|0|0|0|1|0|0|0|0|0|  
3|1|0|0|0|0|3|0|6|9|6|4|1|0|  
0|0|2|0|0|0|0|0|1|1|1|2|3|  
0|1|3|5|2|1|0|0|3|5|0|0|0|0|  
0|0|0|0|0|0|0|0|0|1|0|0|0|0|  
0|0|0|0|0|0|0|0|0|0|0|0|0|0|  
0|0|0|0|0|0|0|0|0|1|0|0|1|1|  
0|0|0|0|0|0|1|0|1|1|0|0|0|0|  
0|0|0|0|0|0|0|0|0|0|0|0|0|0|  
0|0|0|0|0|0|0|0|0|1|0|0|0|0|  
0|0|0|1|0|0|1|1|0|0|4|6|1|1|  
0|0|0|0|0|0|0|0|0|0|0|0|0|0|  
0|0|0|0|0|0|0|0|1|1|0|0|0|1|  
0|0|0|0|0|0|0|0|0|0|0|0|0|0|  
0|0|0|0|0|0|0|0|0|0|0|0|0|0|  
0|0|1|0|0|0|0|0|1|1|0|0|0|0|  
0|0|0|0|0|0|0|0|0|0|0|0|0|0|  
0|0|0|0|0|0|0|0|0|0|0|0|0|0|  
0|0|0|0|0|0|0|0|1|0|0|0|0|0|  
0|0|1|0|0|0|0|0|1|1|0|1|0|0|  
1|0|0|0|0|1|0|0|0|0|0|0|1|1|  
0|0|0|0|0|0|0|0|0|0|0|0|0|0|  
0|0|0|0|0|0|1|0|0|0|0|0|0|0|  
0|0|2|1|0|0|0|1|1|1|0|0|2|2|  
0|0|0|0|0|0|0|0|0|0|0|0|0|0|  
0|0|0|1|1|0|0|0|0|0|0|0|1|0|  
0|0|0|0|0|0|0|0|0|0|0|0|0|0|  
0|0|0|1|0|0|0|0|1|3|0|0|0|0|  
0|0|0|0|0|0|0|0|0|0|0|0|0|0|  
0|0|0|0|0|0|0|1|1|1|0|0|1|1|  
0|0|0|0|0|0|1|0|0|2|0|0|1|0|  
0|0|0|0|0|0|0|0|0|0|0|0|0|0|  
0|0|0|0|0|0|0|0|0|0|0|0|0|0|  
0|0|1|0|0|0|0|0|0|0|0|0|0|0|  
0|0|0|0|0|0|0|0|0|0|0|0|0|0|  
0|0|0|0|0|0|0|0|0|1|0|0|1|0|  
0|0|0|0|0|0|0|0|0|0|0|0|0|0|  
0|0|0|0|0|0|0|0|0|0|0|0|0|0|  
1|0|0|0|0|0|0|1|1|1|0|0|0|0|  
0|0|0|0|0|0|0|0|0|0|0|0|0|0|  
0|0|0|0|0|0|0|0|0|0|0|0|0|0|  
0|0|0|0|0|0|0|1|1|1|2|0|1|  
0|0|0|0|0|0|0|0|0|0|0|0|0|0|  
0|0|0|0|0|0|0|1|0|0|0|0|0|





(A) entire PPIN

0|0|0|0|0|0|1|0|0|0|0|0|1  
2|8|2|3|0|0|2|14|4|2|0|0|0  
0|0|1|0|0|0|0|0|1|1|0|0|0  
1|0|3|0|0|0|2|1|9|9|3|4|3|2  
0|0|9|8|3|1|1|0|1|1|0|0|5|9  
1|1|6|0|0|0|1|1|4|5|1|3|2|0  
0|0|2|0|0|0|0|0|1|1|1|2|3  
0|0|0|0|0|0|0|0|0|0|0|2|1  
0|0|0|0|0|0|0|0|3|3|1|0|1|3  
0|0|1|0|0|0|0|0|0|0|0|0|1  
0|0|3|4|0|0|0|0|2|2|0|0|4|2  
0|0|0|0|0|0|0|0|0|1|0|0|0  
0|0|0|0|0|0|0|0|0|2|0|0|0  
0|0|0|0|0|0|0|0|3|4|0|0|0  
0|0|0|0|0|0|0|0|0|0|0|0  
0|0|2|6|0|0|0|0|1|1|0|1|2|1  
0|1|0|0|0|0|0|0|1|1|1|0|0|0  
0|0|0|0|0|0|0|0|2|2|0|0|0  
0|0|0|0|0|0|0|0|0|0|0|0  
0|0|3|0|0|0|0|2|1|6|3|3|2|3  
0|0|0|0|0|0|1|0|1|1|0|0|1|2  
0|0|2|1|1|0|1|0|2|2|0|0|0  
0|0|1|0|0|0|0|0|3|3|1|0|0|0  
0|0|1|0|0|0|0|0|0|0|0|0|2|0  
0|0|0|0|0|0|0|1|0|2|1|0|2|3  
0|0|0|0|0|0|0|0|0|0|0|0|0  
0|0|0|0|0|0|0|0|0|0|0|1|2  
0|0|0|0|0|0|1|0|0|0|0|0|0  
0|0|0|0|0|1|0|0|1|1|0|0|2|1  
0|0|0|0|0|0|0|0|0|0|0|0|1  
0|0|1|0|0|0|0|0|0|0|0|0|0  
0|0|0|0|0|0|0|0|0|0|0|0|1  
0|0|0|0|0|0|0|0|1|2|0|1|2|3  
0|0|0|0|0|0|0|0|1|2|0|1|0|0  
0|0|0|0|0|0|0|0|2|0|0|1|2|1  
0|0|0|0|0|0|0|0|0|0|0|0|0  
2|0|1|0|0|1|0|0|1|3|0|0|1|1  
0|0|2|0|0|0|0|0|3|2|1|1|0|1  
0|0|7|3|0|1|0|0|6|13|0|0|0  
0|0|3|1|1|0|0|0|0|0|1|1|5|2  
0|0|0|0|1|0|0|0|0|0|0|0|3|0  
0|0|0|0|0|0|0|0|0|0|0|0|0  
1|1|0|0|0|1|1|3|5|7|1|2|9|6  
1|1|0|0|0|0|0|0|1|0|1|1|1|1  
0|0|1|0|0|1|0|0|2|3|0|1|4|1  
0|0|0|0|0|0|0|0|0|0|0|0|0  
0|0|5|5|2|0|0|0|4|4|3|1|0|0  
2|3|0|0|0|0|1|1|0|2|1|1|0|0  
0|0|1|0|0|0|2|1|2|3|2|3|2|1  
0|0|10|8|4|0|1|2|5|7|1|2|3|6  
1|0|2|0|0|2|1|4|5|4|3|1|7|3

(A) entire PPIN

0|0|1|0|0|0|1|0|1|2|0|0|0|1  
0|0|0|0|0|0|4|1|0|1|0|2|1|0  
0|1|0|0|0|0|3|2|4|6|1|1|2|1  
1|1|0|0|0|1|2|2|1|2|1|1|2|1  
0|0|3|0|0|0|3|1|2|1|3|1|1|1  
0|0|0|0|0|0|1|1|1|4|2|2|3|2  
0|1|0|0|0|0|1|1|2|2|0|0|2|1  
0|0|0|0|0|0|0|0|1|1|0|0|4|4  
3|1|0|0|0|0|3|0|6|9|6|4|1|0  
0|0|3|1|0|0|1|1|3|2|1|2|2|1  
0|0|0|0|0|0|0|0|1|4|1|0|2|0  
1|1|1|0|0|1|0|0|1|2|2|1|0|0  
0|0|0|0|0|0|1|1|2|3|0|0|1|1  
0|0|0|0|0|0|0|0|2|3|2|1|1|0  
2|0|1|0|0|1|1|2|6|6|4|4|2|1  
0|0|0|0|0|0|1|2|4|5|0|2|0|2  
1|2|1|0|0|1|1|1|2|2|0|0|1|3  
3|3|0|0|0|1|1|1|2|3|1|2|1|1  
1|0|0|0|0|0|0|1|1|1|0|0|0|0  
0|0|0|0|0|0|3|2|1|2|0|0|1|1  
0|0|1|1|0|0|0|0|0|0|0|0|0|0  
1|0|0|0|0|0|0|0|3|6|0|1|0|1  
0|0|1|1|1|0|0|0|2|3|1|1|1|0  
0|0|4|1|1|0|1|0|4|6|2|6|0|0  
1|1|4|2|1|2|1|1|3|5|3|2|2|2  
0|0|0|0|0|0|0|0|2|1|2|4|5|7  
1|0|4|3|0|0|0|1|3|3|0|0|0|0  
2|1|1|0|0|1|1|0|1|1|1|0|2|3  
0|0|0|0|0|0|0|0|0|1|0|0|1|0  
19|1|20|3|23|4|24|3|20|8|17|3|22|7|26|3|24|9|25|0|25|7|22|5|21|7  
20|28|32|41|47|26|19|21|63|55|24|27|51|45  
22|31|47|47|47|25|23|26|44|50|30|37|22|15  
10|9|18|16|7|7|12|12|24|29|6|7|22|22  
12|18|29|29|19|17|19|23|30|31|29|27|0|0  
13|18|15|11|7|18|37|36|33|40|23|28|28|38  
7|1|14|10|1|2|0|0|19|26|8|7|6|3  
9|7|15|8|11|10|21|22|30|35|26|26|43|38  
12|11|12|11|8|19|1|6|46|50|13|12|0|0  
8|5|11|7|0|5|6|5|16|17|4|5|15|11  
7|8|9|12|12|7|18|16|33|29|14|14|28|24  
9|7|3|0|1|6|10|14|22|27|17|21|15|20  
10|11|13|15|7|11|6|9|23|23|14|11|1|0  
3|3|8|6|6|3|3|5|8|8|4|6|7|8  
10|9|9|6|2|13|16|10|15|20|36|36|17|15  
11|12|9|13|10|12|7|10|13|14|10|10|3|1  
1|1|4|3|1|2|5|6|6|10|2|4|6|5  
2|1|6|5|1|1|0|1|9|11|3|1|5|4  
5|4|8|7|7|4|16|13|21|22|9|12|18|19  
5|1|6|10|7|2|0|0|1|3|0|0|6|5  
3|1|9|7|6|0|2|1|7|6|2|2|7|5  
3|6|6|5|3|4|0|0|5|5|1|2|6|8

(A) entire PPIN

3|0|2|0|0|1|1|0|10|9|0|3|2|2  
1|5|3|3|1|3|8|6|10|16|3|5|11|11  
0|0|5|6|4|0|4|5|6|8|0|0|3|5  
6|10|3|1|0|10|3|8|11|12|9|10|0|5  
2|4|9|6|3|4|2|2|10|10|4|4|9|6  
2|2|5|5|5|2|0|0|5|7|0|0|9|7  
2|1|6|4|1|3|4|4|4|10|2|2|3|7  
3|1|3|1|0|3|8|6|8|7|4|5|4|8  
8|10|7|3|1|9|11|8|19|16|7|5|6|8  
3|3|2|3|1|4|2|3|9|11|5|4|0|0  
2|1|1|3|10|8|5|5|4|1|1|1|9|9|3|2  
3|1|1|1|0|2|5|4|5|5|4|4|3|5  
3|2|4|1|0|2|0|0|5|5|1|1|4|5  
5|7|10|7|8|5|0|0|8|6|1|1|1|0  
3|4|6|8|3|4|4|5|7|6|6|6|2|1  
6|6|2|0|0|3|0|7|4|3|0|0|0|0  
1|2|3|1|0|0|4|5|3|6|3|4|4|3  
4|4|4|4|1|5|1|1|7|7|4|6|3|6  
5|7|3|2|1|7|3|3|7|8|7|8|4|7  
0|0|0|0|0|0|0|0|0|0|0|0|0|0|0  
2|0|4|4|2|1|1|0|3|3|2|1|1|1  
1|1|1|1|0|2|4|3|3|4|1|2|4|4  
1|3|7|5|3|2|3|6|8|7|5|5|0|1  
1|1|3|5|2|0|9|4|7|10|3|2|4|3  
1|0|4|1|2|2|1|1|3|3|0|0|4|3  
0|0|0|0|0|0|6|6|7|8|0|1|10|14  
4|4|0|0|0|1|7|7|8|8|2|3|1|3  
0|0|1|1|0|0|9|5|1|2|0|1|4|4  
0|0|0|0|0|0|5|3|4|5|1|1|4|5  
4|2|5|3|1|2|1|0|4|7|1|0|3|1  
1|0|5|2|0|2|3|0|5|7|1|1|2|1  
1|0|0|0|0|0|5|2|3|1|2|1|4|1  
3|1|0|0|0|2|1|0|3|4|0|0|4|4  
1|0|3|1|1|0|0|0|3|5|2|2|2|2  
0|0|0|0|0|0|0|0|0|0|2|24|11  
0|0|1|0|1|0|2|3|4|4|3|1|3|4  
5|1|5|3|1|1|1|1|6|6|4|5|4|5  
5|9|6|1|1|7|4|8|9|8|2|2|2|5  
0|0|1|0|0|0|2|1|5|5|4|4|9|7  
1|0|1|2|1|1|0|0|3|3|2|2|1|1  
2|1|3|1|1|1|1|0|3|5|0|0|5|2  
0|1|2|1|0|0|8|8|4|5|1|3|3|4  
1|2|0|0|0|2|6|5|5|7|1|1|4|3  
0|0|3|0|0|1|4|3|3|7|2|1|3|2  
0|0|0|2|0|1|0|1|1|3|0|0|14|8  
2|1|1|0|0|1|5|5|5|6|0|0|0|0  
0|0|3|1|1|1|1|2|2|3|3|1|4|4  
0|0|0|0|0|2|2|2|2|2|2|1|2  
2|2|2|2|0|2|1|0|6|6|3|2|7|7  
1|1|2|1|1|1|1|10|9|4|7|2|3|11|9  
0|0|1|0|0|1|4|4|5|3|2|4|0|0



(A) entire PPIN

2|1|6|6|4|2|0|0|2|2|2|2|1|3  
0|0|2|0|0|0|0|0|4|7|6|5|0|0  
0|0|1|0|0|0|4|1|2|6|1|1|1|1  
2|2|4|2|1|1|0|0|6|5|2|3|5|5  
1|1|0|1|1|1|2|1|6|7|0|0|1|0  
0|0|0|0|0|0|4|3|2|3|2|2|1|1  
1|0|2|4|2|2|0|0|3|3|2|1|2|3  
2|3|3|1|1|3|4|6|3|4|5|3|2|1  
0|0|1|0|0|1|2|2|4|3|2|3|3|3  
1|0|2|0|0|0|0|0|7|6|1|1|4|5  
0|1|0|0|0|1|0|0|3|3|0|0|2|2  
4|6|5|3|1|2|0|0|8|9|3|4|1|1  
0|0|1|0|0|0|0|0|0|1|0|0|0|0  
1|0|0|0|0|0|1|0|1|1|1|0|0|0  
0|0|0|0|0|0|0|0|6|8|0|0|0|1  
0|0|2|1|0|1|0|0|0|2|4|4|1|0  
0|0|1|0|0|0|0|0|2|2|1|0|2|2  
0|0|1|1|0|0|0|0|1|1|0|1|3|1  
0|0|0|0|0|0|0|0|1|1|0|0|0|0  
0|0|1|0|0|0|2|0|1|1|1|1|1|0  
0|0|0|0|0|0|0|0|0|0|0|0|0|0  
0|1|1|1|1|1|0|0|1|1|0|1|0|1  
1|1|0|0|0|1|1|1|1|1|1|1|0|0  
0|0|1|1|0|0|1|1|1|1|0|0|0|0  
18|26|21|25|9|31|1|2|1|0|3|2|5|6  
0|0|0|0|0|0|0|0|1|1|0|0|0|1  
1|0|0|0|0|0|2|0|1|1|1|0|0|0  
2|2|0|0|0|0|3|1|4|3|1|2|5|2  
0|0|0|0|0|0|0|0|0|1|0|0|0|0  
0|0|0|0|0|0|1|0|1|0|0|0|0|2  
1|0|0|0|1|1|0|0|0|1|0|0|0|0  
0|0|0|0|0|0|0|0|0|0|0|0|0|0  
0|1|0|0|0|0|0|0|1|0|0|0|1|1  
0|0|0|0|0|0|0|0|0|0|0|0|0|0  
0|0|1|0|0|1|0|0|1|1|1|1|1|1  
0|0|0|0|0|0|0|0|0|0|0|0|0|0  
0|0|0|0|0|0|0|0|0|0|0|0|0|0  
0|0|0|0|0|0|0|0|0|1|0|0|0|0  
0|0|1|1|0|0|0|0|1|2|0|0|0|1  
2|1|0|0|0|0|0|0|0|0|0|0|0|0  
4|4|0|0|0|1|2|5|2|6|3|2|0|1  
0|0|2|0|0|0|0|0|2|0|0|0|0|0  
0|0|2|1|0|0|0|1|1|1|0|0|2|2  
0|0|0|0|0|0|5|5|4|6|0|0|5|3  
0|0|0|1|1|0|0|0|0|0|0|0|1|0  
0|0|0|0|0|0|1|0|0|0|0|0|1|0  
0|0|0|0|0|0|0|0|1|1|0|0|1|1  
0|0|1|1|0|0|0|0|0|0|0|0|0|0  
0|0|0|0|0|0|0|0|0|0|0|0|0|0  
2|3|3|4|0|1|4|6|4|5|5|8|1|0  
1|0|0|0|0|0|0|0|1|1|0|1|0|0



(A) entire PPIN

0|0|0|0|0|0|0|0|0|0|0|0|0|1  
0|0|0|0|0|0|0|0|0|0|0|0|0|0  
0|0|0|0|0|0|0|0|0|0|0|0|0|0  
0|0|0|0|0|0|0|0|0|0|0|0|0|0  
0|0|0|0|0|0|0|0|0|0|0|0|0|0  
0|0|0|0|0|0|1|0|0|2|0|0|1|0  
0|0|0|0|0|0|0|1|2|0|0|0|1  
0|0|0|0|0|0|0|0|0|0|0|0|0|0  
0|0|0|0|0|0|0|0|0|0|0|0|0|0  
0|0|0|0|0|0|0|0|0|0|0|0|0|0  
1|1|1|0|0|1|1|2|1|1|1|0|0|0  
0|0|0|0|0|0|0|0|0|0|0|0|0|0  
2|1|2|2|0|2|2|2|4|6|2|2|0|0  
0|0|0|0|0|0|1|2|2|4|0|0|1|3  
0|0|0|0|0|0|0|1|0|0|0|0|0  
0|0|0|0|0|0|0|0|0|0|0|0|0|0  
0|0|0|0|0|0|0|0|0|0|0|0|0|0  
0|0|0|0|0|0|0|0|0|0|0|0|0|0  
0|0|0|0|0|0|0|0|0|0|0|0|0|0  
0|0|0|0|0|0|4|5|3|3|0|0|2|1  
0|0|0|0|0|0|0|0|0|0|0|0|0|0  
0|0|0|0|0|0|0|0|0|0|0|0|0|0  
0|0|0|0|0|0|0|0|0|0|0|0|0|0  
0|0|0|0|0|0|0|0|0|0|0|0|0|0  
0|0|0|0|0|0|0|0|2|2|0|0|0|0  
0|0|0|0|0|0|0|0|2|1|0|0|2|5  
0|0|1|0|0|0|0|0|0|2|0|0|0|0  
0|0|1|1|0|0|1|1|0|0|0|0|0|0  
0|0|1|0|0|0|0|0|1|1|0|0|0|1  
0|0|0|0|0|0|0|0|0|0|0|0|0|0  
0|0|0|0|0|0|0|0|1|1|0|0|1|0  
0|0|0|0|0|0|0|0|0|0|0|0|0|0  
0|0|0|0|0|0|0|0|0|0|0|0|0|0  
0|0|0|0|0|0|0|0|0|0|0|0|0|0  
0|0|0|0|0|0|0|0|0|0|0|0|0|0  
0|0|0|0|0|0|0|0|0|0|0|0|0|0  
0|0|0|0|0|0|0|0|0|0|0|0|0|0  
0|0|0|0|0|0|1|1|0|0|0|0|0|0  
0|0|1|0|0|0|0|0|0|0|0|0|0|0  
0|0|0|0|0|0|0|0|0|0|0|0|0|0  
0|0|0|0|0|0|0|0|0|0|0|0|0|0  
0|0|0|0|0|0|0|0|0|0|0|0|0|0  
0|0|0|0|0|0|0|0|0|0|0|0|0|0  
0|0|0|0|0|0|0|0|1|0|0|0|1  
0|0|0|0|0|0|0|0|0|0|0|0|0|0  
0|0|0|0|0|0|1|1|3|0|0|7|4  
0|0|0|0|0|0|0|0|1|0|0|0|1  
0|0|1|0|0|0|0|0|0|0|0|0|0|0  
0|0|0|0|0|0|0|0|0|0|0|0|0|0  
0|1|0|0|0|0|0|0|0|1|1|0|0|0



(A) entire PPIN

0|0|0|0|0|0|0|0|0|0|0|0|0|0|0|0|
0|0|1|0|0|0|0|0|3|3|1|0|0|0|
0|0|1|0|0|0|0|0|1|2|1|1|1|1|
0|0|0|0|0|0|0|0|2|3|0|2|1|0|
0|0|1|1|0|0|9|5|1|2|0|1|4|4|
0|0|0|0|0|0|0|0|1|2|0|0|0|0|
0|0|0|0|0|0|2|1|2|2|0|0|0|1|
0|0|0|0|0|0|0|0|0|0|0|0|0|0|
0|0|0|0|0|0|0|0|0|0|0|0|0|0|
0|0|3|5|2|0|0|0|1|3|0|0|0|0|
0|0|0|0|0|0|0|0|0|0|0|0|0|0|
0|0|0|0|0|0|0|0|2|0|0|0|1|1|
0|0|0|0|0|0|0|0|2|5|0|0|0|0|
0|1|0|0|0|0|0|0|1|1|1|0|0|0|
0|1|0|0|0|0|0|0|1|0|0|0|1|1|
0|0|0|0|0|0|0|1|1|0|3|1|0|0|2|
0|0|0|0|0|0|0|0|0|0|0|0|0|0|
0|0|1|0|0|0|0|0|2|0|0|0|0|
0|0|0|0|0|0|0|0|0|1|0|0|0|1|
0|0|0|0|0|0|0|0|6|8|0|0|0|1|
0|0|0|0|0|0|3|2|1|2|0|0|1|1|
0|0|1|0|0|0|0|0|0|0|0|0|0|
0|0|0|0|0|0|0|0|2|3|2|1|1|0|
0|0|0|0|0|0|2|1|2|3|0|0|1|0|
0|0|0|0|0|0|1|1|1|1|1|1|0|0|
0|0|0|0|0|0|0|0|1|2|0|1|0|0|
0|0|0|0|0|0|1|0|0|1|0|1|0|0|
2|8|2|3|0|0|2|14|4|2|0|0|0|0|
0|0|0|0|0|0|0|0|1|1|1|2|0|1|
0|0|0|0|0|0|0|0|2|0|0|0|0|
6|6|2|0|0|3|0|7|4|3|0|0|0|0|
6|10|3|1|0|10|3|8|1|1|12|9|10|0|5|
0|0|0|0|0|0|1|0|0|0|0|0|1|0|
0|0|0|0|0|0|2|0|4|3|0|0|0|1|
0|0|0|0|0|0|0|0|0|1|0|0|0|0|
0|0|0|1|1|0|0|0|0|0|0|0|1|0|
0|0|0|0|0|0|0|0|0|0|0|0|0|0|
0|0|0|0|0|0|0|0|0|0|0|0|0|0|
0|0|0|0|0|0|0|0|0|0|0|0|0|0|
0|0|0|0|0|0|1|1|1|0|0|0|1|
0|0|0|0|0|0|0|0|0|0|0|0|1|1|
1|1|0|0|0|0|0|0|1|0|1|1|1|1|
0|0|0|0|0|0|0|0|0|0|0|0|0|0|
0|0|0|0|0|0|2|1|3|6|0|0|0|1|
0|0|0|0|0|0|0|0|1|1|0|0|0|0|
0|0|0|0|0|0|0|2|1|2|4|5|7|
0|0|0|0|0|0|0|0|0|0|0|0|0|0|
0|0|0|0|0|0|4|1|0|1|0|2|1|0|
0|0|7|3|0|1|0|0|6|13|0|0|0|0|
0|0|0|0|0|0|0|0|0|0|0|0|0|0|
0|0|0|0|0|0|0|0|1|3|0|0|0|1|

(A) entire PPIN

0|0|3|1|0|0|0|0|0|1|0|0|0|0  
0|0|0|0|0|0|0|0|0|0|0|0|0|0|0  
0|0|0|0|0|0|0|0|0|1|0|0|2|2  
0|0|0|0|0|0|1|1|1|1|0|0|0|0  
0|0|0|0|0|0|0|0|0|0|0|0|0|0|0  
0|0|1|1|0|0|0|0|0|0|0|0|0|0|0  
0|0|0|0|0|0|0|0|1|0|0|0|0|0|0  
0|0|0|0|0|0|1|1|2|3|0|0|1|1|1  
0|0|1|2|1|0|0|0|0|0|0|0|0|0|0|0  
0|0|0|0|0|0|2|1|1|1|0|0|1|1|0  
0|0|0|0|0|0|0|0|0|0|0|0|0|0|0|0  
0|0|0|0|0|0|0|0|0|0|0|0|2|1|1  
0|0|0|0|0|0|0|0|0|0|0|0|0|0|0|0  
0|0|0|0|0|0|1|1|2|1|0|0|0|0|0|0  
0|0|0|0|0|0|0|0|0|0|1|0|0|0|0|0  
0|0|1|0|0|0|0|0|1|0|0|0|0|0|0|0  
0|0|0|0|0|0|0|0|0|0|0|0|0|0|0|0  
0|0|0|0|0|0|1|2|2|4|0|0|1|1|3  
0|0|2|0|0|0|0|0|0|1|1|1|2|3|3  
0|0|0|0|0|0|3|2|0|1|0|0|0|0|0|0  
0|0|0|0|0|0|0|0|0|0|0|0|0|0|0|0  
0|0|0|0|1|0|0|0|0|0|0|0|3|0|0|0  
0|0|1|1|0|0|0|0|1|1|0|1|3|1|1|1  
0|0|0|0|0|0|0|0|0|0|0|0|0|0|0|0  
0|0|0|0|0|0|1|2|4|5|0|2|0|2|2|2  
0|0|0|0|0|0|1|1|5|6|0|0|1|1|2|2  
0|0|0|0|0|0|0|2|0|0|3|3|0|0|0|0  
0|1|0|1|0|1|0|0|0|0|1|2|4|0|0|0|0  
0|0|0|0|0|0|0|0|0|0|0|0|0|0|0|0  
0|0|0|0|0|0|2|2|1|2|2|1|0|0|0|0  
1|1|1|0|0|1|1|2|1|1|1|0|0|0|0|0  
0|0|0|0|0|0|0|0|1|1|0|0|4|4|4|4  
0|0|2|1|1|0|1|0|2|2|0|0|0|0|0|0  
0|0|1|0|0|0|0|0|3|2|1|1|0|0|0|0  
1|0|0|0|0|0|0|1|1|1|0|0|0|0|0|0  
0|0|0|0|0|0|0|0|0|0|0|0|0|0|0|0  
0|0|0|0|0|0|4|3|2|3|2|2|1|1|1|1  
0|1|0|0|0|1|0|0|3|3|0|0|2|2|2|2  
2|3|0|0|0|0|1|1|0|2|1|1|0|0|0|0  
3|3|0|0|0|1|1|1|2|3|1|2|1|1|1|1  
2|2|0|0|0|0|3|1|4|3|1|2|5|2|2|2  
0|0|3|1|1|1|1|2|2|3|3|1|4|4|4|4  
0|0|0|0|0|0|4|5|3|3|0|0|2|1|1|1  
0|0|1|0|0|0|1|2|3|8|1|0|2|0|0|0|0  
0|0|3|4|0|0|0|0|2|2|0|0|4|2|2|2  
0|0|3|1|0|0|1|1|3|2|1|2|2|1|1|1  
1|0|2|1|0|0|0|0|2|2|2|1|0|0|0|0  
0|0|3|1|1|0|0|0|0|0|1|1|5|2|2|2  
0|0|0|0|0|0|0|0|5|8|0|0|1|1|0|0  
191|203|234|243|208|173|227|263|249|250|257|225|21|7  
13|18|15|11|7|18|37|36|33|40|23|28|28|38

(A) entire PPIN

10|9|9|6|2|13|16|10|15|20|36|36|17|15  
7|8|9|12|12|7|18|16|33|29|14|14|28|24  
9|7|15|8|11|10|21|22|30|35|26|26|43|38  
22|31|47|47|47|25|23|26|44|50|30|37|22|15  
20|28|32|41|47|26|19|21|63|55|24|27|51|45  
12|11|12|11|8|19|1|6|46|50|13|12|0|0  
5|4|8|7|7|4|16|13|21|22|9|12|18|19  
12|18|29|29|19|17|19|23|30|31|29|27|0|0  
10|11|13|15|7|11|6|9|23|23|14|11|1|0  
9|7|3|0|1|6|10|14|22|27|17|21|15|20  
1|5|3|3|1|3|8|6|10|16|3|5|11|11  
10|9|18|16|7|7|12|12|24|29|6|7|22|22  
5|9|6|1|1|7|4|8|9|8|2|2|2|5  
18|26|21|25|9|31|1|2|1|0|3|2|5|6  
8|10|7|3|1|9|11|8|19|16|7|5|6|8  
3|1|9|7|6|0|2|1|7|6|2|2|7|5  
1|1|2|1|1|1|10|9|4|7|2|3|11|9  
11|12|9|13|10|12|7|10|13|14|10|10|3|1  
5|7|10|7|8|5|0|0|8|6|1|1|1|0  
8|5|11|7|0|5|6|5|16|17|4|5|15|11  
3|3|8|6|6|3|3|5|8|8|4|6|7|8  
1|1|4|3|1|2|5|6|6|10|2|4|6|5  
4|4|0|0|0|1|7|7|8|8|2|3|1|3  
2|1|13|10|8|5|5|4|11|11|9|9|3|2  
0|0|9|8|3|1|1|0|1|1|0|0|5|9  
0|0|0|0|0|6|6|7|8|0|1|10|14  
1|2|0|0|0|2|6|5|5|7|1|1|4|3  
1|2|3|1|0|0|4|5|3|6|3|4|4|3  
5|1|6|10|7|2|0|0|1|3|0|0|6|5  
4|4|4|4|1|5|1|1|7|7|4|6|3|6  
0|1|2|1|0|0|8|8|4|5|1|3|3|4  
0|0|5|6|4|0|4|5|6|8|0|0|3|5  
7|1|14|10|1|2|0|0|19|26|8|7|6|3  
3|4|6|8|3|4|4|5|7|6|6|6|2|1  
3|1|1|1|0|2|5|4|5|5|4|4|3|5  
2|1|6|5|1|1|0|1|9|11|3|1|5|4  
3|3|2|3|1|4|2|3|9|11|5|4|0|0  
0|0|1|0|0|0|2|1|5|5|4|4|9|7  
2|0|1|0|0|1|1|2|6|6|4|4|2|1  
0|0|0|0|0|5|3|4|5|1|1|4|5  
1|3|7|5|3|2|3|6|8|7|5|5|0|1  
4|6|5|3|1|2|0|0|8|9|3|4|1|1  
2|3|3|4|0|1|4|6|4|5|5|8|1|0  
0|0|1|0|0|1|4|4|5|3|2|4|0|0  
1|0|4|1|2|2|1|1|3|3|0|0|4|3  
2|4|9|6|3|4|2|2|10|10|4|4|9|6  
0|0|10|8|4|0|1|2|5|7|1|2|3|6  
0|0|4|1|1|0|1|0|4|6|2|6|0|0  
0|0|1|0|1|0|2|3|4|4|3|1|3|4  
0|0|2|2|1|1|6|3|2|2|1|1|1|1  
4|4|0|0|0|1|2|5|2|6|3|2|0|1

(A) entire PPIN

0|0|0|0|0|5|5|4|6|0|0|5|3  
2|3|3|1|1|3|4|6|3|4|5|3|2|1  
2|1|6|4|1|3|4|4|4|10|2|2|3|7  
3|2|4|1|0|2|0|0|5|5|1|1|4|5  
1|1|3|5|2|0|9|4|7|10|3|2|4|3  
2|1|6|6|4|2|0|0|2|2|2|2|1|3  
0|0|1|0|0|1|2|2|4|3|2|3|3|3  
2|1|5|6|2|2|0|0|5|4|1|1|2|1  
1|0|3|0|0|0|2|1|9|9|3|4|3|2  
0|1|0|0|0|0|3|2|4|6|1|1|2|1  
0|0|0|0|0|0|2|2|2|2|2|2|1|2  
2|2|2|2|0|2|1|0|6|6|3|2|7|7  
1|1|4|2|1|2|1|1|3|5|3|2|2|2  
0|0|1|0|0|0|4|1|2|6|1|1|1|1  
1|1|0|0|0|1|1|3|5|7|1|2|9|6  
1|1|1|1|0|2|4|3|3|4|1|2|4|4  
3|1|0|0|0|2|1|0|3|4|0|0|4|4  
2|1|1|0|0|1|5|5|5|6|0|0|0|0  
5|7|3|2|1|7|3|3|7|8|7|8|4|7  
1|0|3|1|1|0|0|0|3|5|2|2|2|2  
1|0|2|4|2|2|0|0|3|3|2|1|2|3  
2|1|2|2|0|2|2|2|4|6|2|2|0|0  
1|1|6|0|0|0|1|1|4|5|1|3|2|0  
2|1|3|1|1|1|1|0|3|5|0|0|5|2  
5|1|5|3|1|1|1|1|6|6|4|5|4|5  
3|1|3|1|0|3|8|6|8|7|4|5|4|8  
0|1|3|5|2|1|0|0|3|5|0|0|0|0  
0|0|1|1|0|0|2|2|2|2|3|3|4|6  
0|0|3|0|0|0|3|1|2|1|3|1|1|1  
3|0|2|0|0|1|1|0|10|9|0|3|2|2  
1|2|1|0|0|1|1|1|2|2|0|0|1|3  
0|0|5|6|1|0|0|0|2|2|0|0|0|0  
2|2|4|2|1|1|0|0|6|5|2|3|5|5  
1|0|0|0|0|0|5|2|3|1|2|1|4|1  
1|0|4|3|0|0|0|1|3|3|0|0|0|0  
1|1|0|1|1|1|2|1|6|7|0|0|1|0  
0|0|0|0|0|0|0|0|0|0|0|0|0|0  
1|1|0|0|0|1|2|2|1|2|1|1|2|1  
0|0|0|0|0|0|0|0|0|0|0|0|0|0  
0|0|0|0|0|0|0|0|0|0|0|0|0|0  
2|1|0|0|0|0|0|0|0|0|0|0|0|0  
0|0|0|0|0|0|0|0|1|1|0|0|1|1  
4|2|5|3|1|2|1|0|4|7|1|0|3|1  
0|0|0|0|0|0|0|0|0|2|0|0|0|0  
1|0|5|2|0|2|3|0|5|7|1|1|2|1  
0|0|0|0|0|0|0|0|0|1|0|0|0|0  
0|0|0|0|0|0|0|0|0|0|0|0|0|0  
1|0|2|0|0|2|1|4|5|4|3|1|7|3  
0|0|0|0|0|0|0|0|3|4|0|0|4|3  
0|1|1|1|1|1|0|0|1|1|0|1|0|1  
0|0|1|0|0|0|0|0|0|0|0|0|0|0



(A) entire PPIN

1|0|1|2|1|1|0|0|3|3|2|2|1|1  
0|0|0|0|0|0|0|0|2|2|0|0|0|0  
0|0|0|0|0|0|2|2|0|1|0|0|0|0  
0|0|0|0|0|0|0|0|0|0|0|0|1|2  
0|0|0|0|0|0|0|0|1|0|2|0|0|0  
2|1|2|1|1|2|1|1|2|1|3|3|0|0  
2|0|4|4|2|1|1|0|3|3|2|1|1|1  
0|0|0|0|0|0|0|0|0|0|0|0|1|1  
0|0|0|0|0|0|0|0|1|1|0|0|1|1  
0|0|0|0|0|0|0|0|2|2|0|0|0|0  
0|0|0|0|0|0|0|0|1|1|0|0|0|0  
0|0|1|0|0|0|0|0|0|0|0|0|1|1  
0|0|0|0|0|0|0|0|0|0|0|0|0|0  
0|0|0|0|0|0|0|0|0|0|0|2|24|11  
0|0|0|0|0|0|0|0|6|6|0|0|0|0  
1|0|0|0|0|0|1|0|1|1|1|0|0|0  
0|0|0|0|0|0|0|0|0|0|0|0|0|0  
0|0|0|0|0|0|0|0|0|0|0|0|0|0  
0|0|2|1|0|0|0|1|1|1|0|0|0|0  
0|0|0|0|0|0|0|0|0|0|0|0|0|0  
0|0|0|0|0|0|0|0|0|0|0|0|0|0  
0|0|0|0|0|1|0|0|0|1|0|0|0|0  
0|0|1|0|0|0|2|1|2|3|2|3|2|1  
3|6|6|5|3|4|0|0|5|5|1|2|6|8  
0|0|5|5|2|0|0|0|4|4|3|1|0|0  
0|0|0|0|0|0|0|0|0|0|0|0|0|0  
1|1|0|0|0|1|1|1|1|1|1|1|0|0  
0|0|0|0|0|0|0|0|0|0|0|0|0|0  
0|0|0|0|0|0|0|0|0|0|1|2|2|2  
0|0|0|0|0|0|0|0|0|0|0|0|0|0  
0|0|0|0|0|0|0|0|0|0|0|0|0|0  
0|0|0|0|0|0|0|0|0|1|0|0|0|0  
0|0|0|0|0|0|0|0|0|0|0|0|0|0  
0|0|0|0|0|0|0|1|0|2|1|0|2|3  
1|0|0|0|0|0|0|0|0|0|0|0|0|0  
0|0|0|0|0|0|0|0|0|0|0|1|0|0  
1|0|2|0|0|0|0|0|0|0|0|0|1|0  
0|0|2|0|0|0|0|0|4|7|6|5|0|0  
0|0|0|0|0|0|2|2|1|2|0|0|1|1  
1|1|1|0|0|1|0|0|1|2|2|1|0|0  
0|0|0|0|0|0|0|0|1|0|0|0|0  
0|0|0|0|0|0|0|0|1|1|0|0|0|0  
0|0|0|0|0|0|1|0|0|1|0|0|0|0  
0|0|0|0|0|0|0|0|3|3|1|0|1|3  
0|0|0|0|0|0|0|0|0|0|0|0|0|0  
0|0|0|0|0|0|0|0|0|0|1|1|1|1  
0|0|1|1|1|0|0|0|2|3|1|1|1|0  
0|0|0|0|0|0|1|0|0|0|1|1|0|0  
0|0|0|0|0|0|0|0|0|0|0|0|1|0  
0|0|3|0|0|1|4|3|3|7|2|1|3|2  
0|0|3|0|0|0|2|1|6|3|3|2|3

(A) entire PPIN

1|0|0|0|0|2|0|1|1|1|0|0|0|0  
0|0|0|0|0|0|0|0|1|1|0|0|0|0  
3|3|0|0|0|0|1|2|3|5|0|0|0|0  
0|0|0|0|0|0|0|0|0|0|0|0|0|0  
0|0|0|0|0|0|0|0|0|0|0|0|0|0  
0|0|0|0|0|0|0|0|0|0|0|0|0|0  
1|0|0|0|0|0|0|0|0|1|0|0|0|0  
0|0|1|0|0|0|0|0|0|0|0|0|0|0  
1|0|0|1|0|0|2|0|2|1|0|1|1|0  
0|0|0|0|0|0|0|0|1|0|0|0|0|0  
0|0|0|0|0|0|0|0|0|0|0|1|2  
0|0|0|0|0|0|0|0|0|0|0|0|0|0  
0|0|0|0|0|0|0|0|0|0|0|0|0|0  
0|0|0|0|0|0|0|0|0|0|0|1|1  
0|0|0|0|0|0|1|0|0|0|0|0|0|0  
0|0|0|0|0|0|0|0|1|1|0|0|0|1  
0|0|0|0|0|0|0|0|0|0|0|0|0|0  
0|0|0|0|0|0|0|0|0|0|0|0|0|0  
0|0|0|0|0|0|0|0|0|0|0|0|0|0  
0|0|0|0|0|0|0|0|0|0|0|0|0|0  
0|0|0|0|0|0|0|0|0|0|0|0|0|0  
0|0|0|0|0|0|0|0|0|1|0|0|0|0  
0|0|0|0|0|0|0|0|0|0|0|0|0|0  
0|0|0|0|0|0|1|0|0|0|0|0|0|0  
0|0|0|0|0|0|0|0|0|0|0|0|0|0  
0|0|1|0|0|0|0|1|2|0|0|0|1  
0|0|0|0|0|0|0|0|0|0|0|0|0|0  
0|0|0|0|0|0|0|0|0|0|0|0|0|0  
0|0|0|0|0|0|1|0|0|0|0|0|0|0  
0|0|0|0|0|0|0|0|0|0|0|0|0|0  
0|0|0|1|0|0|0|0|1|3|0|0|0|0  
1|0|0|0|0|0|0|1|2|2|1|1|0|0  
0|0|0|0|0|0|0|0|0|0|0|0|0|0  
0|0|1|1|0|0|0|0|0|0|0|0|0|0  
0|0|0|0|0|0|1|0|0|2|0|0|1|0  
0|0|0|0|0|0|0|0|0|0|0|0|6|4  
0|0|0|0|0|0|0|0|0|0|0|0|0|0  
0|0|0|0|0|0|0|0|0|0|0|0|0|0  
0|0|0|1|0|0|0|0|0|0|0|0|0|0  
0|0|0|0|0|0|0|0|0|0|0|0|0|0  
0|0|0|0|0|0|0|0|0|0|0|0|0|0  
0|0|1|0|0|0|0|0|0|0|0|2|0  
0|0|0|0|0|0|0|0|1|0|0|0|0|0  
0|0|3|1|0|0|1|1|0|0|1|1|2|8  
0|0|0|0|0|0|0|0|0|0|0|2|1  
0|0|0|0|0|0|0|0|0|0|0|0|0|0  
0|0|0|0|0|0|0|0|0|0|0|0|0|0  
0|0|0|0|0|0|0|0|0|0|0|0|0|0  
0|0|0|0|0|0|0|0|0|0|0|0|0|0







(A) entire PPIN

0|0|2|0|0|0|0|0|1|1|1|2|3  
0|0|0|0|0|0|0|0|1|0|0|0|0  
0|0|0|0|0|0|0|2|3|2|1|1|0  
0|0|0|0|0|0|0|0|2|0|0|0|0  
0|0|0|0|0|0|0|1|0|0|0|0|0  
0|0|1|0|0|0|0|0|0|0|0|0|0  
0|0|0|0|0|0|0|4|3|1|2|0|0  
1|2|3|1|0|0|4|5|3|6|3|4|4|3  
0|0|0|0|0|0|0|0|0|0|0|1|1  
0|0|0|0|0|0|0|3|3|0|0|0|0  
0|0|0|0|0|0|0|1|1|0|0|0|0  
0|0|0|0|0|0|0|1|1|1|2|0|1  
0|0|0|0|0|0|0|0|0|0|2|1|0|0  
0|0|1|0|0|0|0|0|0|0|0|0|0  
0|0|0|0|0|0|0|0|1|0|0|0|1  
2|0|1|0|0|1|0|0|1|3|0|0|1|1  
0|0|0|0|0|0|0|0|1|1|0|0|0|0  
0|1|0|0|0|0|0|0|1|1|1|0|0|0  
0|0|0|0|0|0|0|1|1|1|0|0|0|0  
0|0|0|0|0|0|0|0|0|0|0|2|1  
0|0|1|0|0|0|0|0|1|3|0|1|0|0  
0|0|0|0|0|0|0|0|0|0|0|0|0  
0|0|1|0|0|0|0|0|3|3|1|0|0|0  
0|0|0|0|0|0|0|0|0|0|0|0|0  
0|0|0|0|0|0|0|0|0|0|1|1|0|0  
4|2|5|3|1|2|1|0|4|7|1|0|3|1  
1|0|0|0|0|0|0|0|3|6|0|1|0|1  
0|0|0|0|0|0|0|0|1|1|0|1|1|0  
0|0|0|0|0|0|0|0|0|0|0|0|0  
0|0|1|0|0|0|0|0|0|2|0|0|0|0  
0|0|0|0|0|0|0|0|0|0|1|0|0|0  
0|0|0|0|0|0|0|0|0|0|0|0|0  
0|0|0|0|0|0|0|0|1|0|0|0|0|0  
0|0|2|0|0|0|0|0|3|2|1|1|0|1  
2|0|1|0|0|1|1|2|6|6|4|4|2|1  
0|0|1|0|0|1|4|4|5|3|2|4|0|0  
0|0|0|0|0|0|0|0|0|0|0|0|0|0  
1|0|2|0|0|2|1|4|5|4|3|1|7|3  
1|0|0|0|0|1|0|0|2|2|0|0|2|2  
0|0|0|0|0|0|0|0|2|2|0|0|0|0  
2|1|3|1|1|1|1|0|3|5|0|0|5|2  
0|0|1|0|0|0|0|0|1|0|0|0|0|0  
0|0|0|0|0|0|0|0|0|0|1|1|1|1  
1|0|0|0|1|1|0|0|0|1|0|0|0|0  
0|0|0|0|0|0|0|0|0|1|0|0|0|0  
0|0|1|1|0|0|0|0|1|1|0|1|3|1  
0|0|0|0|0|0|0|0|0|0|0|0|0|0  
0|0|0|0|0|0|2|1|1|1|0|0|1|0  
1|1|0|0|0|1|0|0|2|1|1|1|0|0  
0|0|0|0|0|0|0|0|0|0|0|0|0|0  
0|0|0|0|0|0|0|0|0|0|0|0|0



(A) entire PPIN

191|203|234|243|208|173|227|263|249|250|257|225|21|7  
22|31|47|47|47|25|23|26|44|50|30|37|22|15  
12|11|12|11|8|19|1|6|46|50|13|12|0|0  
20|28|32|41|47|26|19|21|63|55|24|27|51|45  
9|7|3|0|1|6|10|14|22|27|17|21|15|20  
13|18|15|11|7|18|37|36|33|40|23|28|28|38  
12|18|29|29|19|17|19|23|30|31|29|27|0|0  
10|11|13|15|7|11|6|9|23|23|14|11|1|0  
8|5|11|7|0|5|6|5|16|17|4|5|15|11  
9|7|15|8|11|10|21|22|30|35|26|26|43|38  
2|1|13|10|8|5|5|4|1|1|1|9|9|3|2  
3|3|8|6|6|3|3|5|8|8|4|6|7|8  
10|9|18|16|7|7|12|12|24|29|6|7|22|22  
7|8|9|12|12|7|18|16|33|29|14|14|28|24  
10|9|9|6|2|13|16|10|15|20|36|36|17|15  
3|1|3|1|0|3|8|6|8|7|4|5|4|8  
8|10|7|3|1|9|11|8|19|16|7|5|6|8  
11|12|9|13|10|12|7|10|13|14|10|10|3|1  
1|3|7|5|3|2|3|6|8|7|5|5|0|1  
5|7|3|2|1|7|3|3|7|8|7|8|4|7  
3|4|6|8|3|4|4|5|7|6|6|6|2|1  
4|4|4|4|1|5|1|1|7|7|4|6|3|6  
2|4|9|6|3|4|2|2|10|10|4|4|9|6  
5|4|8|7|7|4|16|13|21|22|9|12|18|19  
5|1|6|10|7|2|0|0|1|3|0|0|6|5  
2|1|6|4|1|3|4|4|4|10|2|2|3|7  
2|1|6|5|1|1|0|1|9|11|3|1|5|4  
1|1|4|3|1|2|5|6|6|10|2|4|6|5  
5|1|5|3|1|1|1|1|6|6|4|5|4|5  
2|3|3|1|1|3|4|6|3|4|5|3|2|1  
2|2|2|2|0|2|1|0|6|6|3|2|7|7  
6|10|3|1|0|10|3|8|1|1|12|9|10|0|5  
4|6|5|3|1|2|0|0|8|9|3|4|1|1  
2|3|3|4|0|1|4|6|4|5|5|8|1|0  
1|1|4|2|1|2|1|1|3|5|3|2|2|2  
3|1|1|1|0|2|5|4|5|5|4|4|3|5  
0|0|0|0|0|0|0|0|0|0|0|2|24|11  
2|1|6|6|4|2|0|0|2|2|2|2|1|3  
5|9|6|1|1|7|4|8|9|8|2|2|2|5  
0|1|2|1|0|0|8|8|4|5|1|3|3|4  
1|5|3|3|1|3|8|6|10|16|3|5|11|11  
1|2|0|0|0|2|6|5|5|7|1|1|4|3  
0|0|10|8|4|0|1|2|5|7|1|2|3|6  
4|4|0|0|0|1|7|7|8|8|2|3|1|3  
5|7|10|7|8|5|0|0|8|6|1|1|1|0  
3|1|0|0|0|0|3|0|6|9|6|4|1|0  
1|0|0|0|0|0|5|2|3|1|2|1|4|1  
1|0|4|1|2|2|1|1|3|3|0|0|4|3  
1|0|2|4|2|2|0|0|3|3|2|1|2|3  
0|0|3|0|0|1|4|3|3|7|2|1|3|2  
2|2|5|5|5|2|0|0|5|7|0|0|9|7



(A) entire PPIN

3|6|6|5|3|4|0|0|5|5|1|2|6|8  
0|0|0|0|0|0|5|3|4|5|1|1|4|5  
0|0|2|2|1|1|6|3|2|2|1|1|1|1  
2|1|2|1|1|2|1|1|2|1|1|3|3|0|0  
0|0|0|2|0|1|0|1|1|3|0|0|14|8  
2|1|2|2|0|2|2|2|4|6|2|2|0|0  
0|0|1|0|1|0|2|3|4|4|3|1|3|4  
1|0|2|0|0|0|0|7|6|1|1|4|5  
3|1|0|0|0|2|1|0|3|4|0|0|4|4  
0|0|3|1|1|1|1|2|2|3|3|1|4|4  
0|0|1|0|0|0|1|2|3|8|1|0|2|0  
0|0|5|6|4|0|4|5|6|8|0|0|3|5  
1|1|3|5|2|0|9|4|7|10|3|2|4|3  
0|0|0|0|0|0|4|3|2|3|2|2|1|1  
1|1|1|1|1|1|1|1|3|1|1|1|2|2  
1|1|0|1|1|1|2|1|6|7|0|0|1|0  
0|0|0|0|0|0|0|0|0|0|0|0|0|0  
0|0|0|0|0|0|0|0|0|0|0|0|0|0  
1|0|0|0|0|1|0|0|0|0|0|0|0|1  
0|0|0|0|0|0|0|0|0|0|0|0|0|0  
0|0|1|1|0|0|0|0|1|2|0|0|0|1  
0|0|1|1|0|0|0|0|0|0|0|0|0|0  
1|1|1|0|0|1|1|2|1|1|1|0|0|0  
0|0|2|1|0|1|0|0|0|2|4|4|1|0  
0|0|1|0|0|0|0|0|2|2|1|0|2|2  
0|0|0|0|0|0|0|0|0|0|0|0|0|0  
0|0|0|0|0|0|0|0|0|0|0|0|0|0  
0|0|0|0|0|0|4|5|3|3|0|0|2|1  
0|1|1|1|1|1|0|0|1|1|0|1|0|1  
1|1|0|0|0|1|1|1|1|1|1|1|0|0  
0|0|0|0|0|0|0|0|2|2|0|0|0|0  
0|0|1|0|0|1|2|2|4|3|2|3|3|3  
0|0|1|1|0|0|1|1|0|0|0|0|0|0  
0|0|1|1|0|0|1|1|1|1|0|0|0|0  
0|0|0|0|0|0|0|0|1|1|0|0|0|0  
0|0|0|0|0|0|0|0|0|0|0|0|1|0  
1|0|0|0|0|0|0|0|0|0|0|0|0|0  
0|0|0|0|0|0|0|0|0|0|1|0|0|0|1  
0|0|0|0|0|0|0|0|0|0|0|0|0|0  
0|0|0|0|0|0|0|0|1|1|0|0|0|0  
1|0|1|1|0|0|1|0|1|2|0|0|1|1  
0|0|1|0|0|0|0|0|0|0|0|0|0|1  
0|0|5|6|1|0|0|0|2|2|0|0|0|0  
0|0|0|0|0|0|0|0|0|0|0|0|0|0  
2|1|5|6|2|2|0|0|5|4|1|1|2|1  
0|0|0|0|0|0|0|0|0|0|0|0|1|0  
0|0|1|1|0|0|2|2|2|2|3|3|4|6  
1|1|2|1|1|1|10|9|4|7|2|3|1|9  
2|1|1|0|0|1|5|5|5|6|0|0|0|0  
0|1|0|0|0|0|0|0|1|0|0|0|1|1  
0|0|1|0|0|0|0|0|1|1|0|0|0|0

(A) entire PPIN

0|0|0|0|0|0|0|5|8|0|0|1|0  
0|0|0|0|0|0|0|0|0|0|0|0|0  
2|0|0|0|0|0|1|1|5|2|0|1|0|0  
0|0|0|0|0|0|0|0|0|0|0|0|0  
0|0|2|1|0|0|0|1|1|1|0|0|2|2  
2|8|2|3|0|0|2|14|4|2|0|0|0|0  
1|0|0|0|0|0|1|0|1|1|1|0|0|0  
0|0|0|0|0|0|0|0|1|1|0|0|1|1  
0|0|0|0|0|0|0|0|0|0|0|0|0  
0|0|1|0|0|0|2|1|5|5|4|4|9|7  
0|0|0|0|0|0|0|0|0|1|0|0|1|0  
0|0|0|0|0|0|0|0|0|0|0|0|0  
0|0|0|0|0|0|0|0|0|0|0|0|0  
0|0|0|0|0|0|0|0|0|0|0|0|0  
0|0|1|0|0|0|0|0|1|2|1|1|1|1  
0|0|0|0|0|0|0|0|0|0|0|0|0  
0|0|0|0|0|0|0|0|0|0|0|0|0  
0|0|1|0|0|0|0|0|1|1|0|0|0|0  
0|0|1|0|0|0|0|0|1|1|0|0|0|1  
0|0|0|0|0|0|1|2|4|5|0|2|0|2  
0|0|0|0|0|0|0|0|0|0|0|0|0  
0|0|0|0|0|0|0|0|0|1|0|0|0|0  
0|0|6|0|0|0|0|0|1|0|0|0|0|0  
0|0|0|0|0|1|1|0|0|0|0|0|0|0  
0|0|1|0|0|0|0|0|0|0|0|0|0|0  
0|0|0|0|0|0|0|0|0|0|0|0|0  
0|0|1|1|0|0|9|5|1|2|0|1|4|4  
0|0|0|0|0|0|0|0|2|0|2|1|0|0  
0|0|0|0|0|0|0|0|0|0|0|0|0  
0|0|0|0|0|0|0|0|0|1|0|0|1|0  
1|0|2|1|0|0|0|0|2|2|2|1|0|0  
0|0|0|0|0|0|0|0|0|0|0|0|0  
0|0|0|0|0|0|1|1|1|4|2|2|3|2  
0|0|1|0|0|0|4|1|2|6|1|1|1|1  
0|0|1|0|0|0|0|0|0|1|0|0|0|0  
0|0|0|0|0|0|0|0|0|0|0|0|0  
0|0|0|0|0|0|0|0|0|0|0|0|0  
1|0|0|0|0|0|2|0|1|1|1|0|0|0  
0|0|0|0|0|0|0|0|0|0|0|0|0  
2|2|0|0|0|0|3|1|4|3|1|2|5|2  
3|3|0|0|0|0|1|2|3|5|0|0|0|0  
0|1|0|0|0|0|1|1|2|2|0|0|2|1  
0|0|0|0|0|0|4|1|0|1|0|2|1|0  
0|0|0|0|0|1|0|0|4|3|0|0|0|0  
0|0|0|1|1|0|0|0|0|0|0|0|0|0  
0|0|0|0|0|0|0|0|0|0|0|0|0  
0|0|1|0|0|0|0|0|0|0|0|0|0  
0|0|0|0|0|0|0|0|0|0|0|0|0  
0|0|0|0|0|0|0|0|0|1|0|0|0|0  
0|0|0|0|0|0|0|0|0|0|0|0|0  
0|0|0|0|0|0|0|0|0|0|0|0|0







| Bait_ID     | Bait_Symbol | Prey_ID     | Prey_symbol   | SAINT score | Spec        | SpecSum | Spectral Counts in Control         |
|-------------|-------------|-------------|---------------|-------------|-------------|---------|------------------------------------|
| FBgn0034970 | yki         | FBgn0020238 | 14-3-3epsilon | 1.00        | 103 103 117 | 323     | 0 0 0 0 0 0 0 0 0 0 0 0 0 0 0 0    |
| FBgn0034970 | yki         | FBgn0003345 | sd            | 1.00        | 10 9 8      | 27      | 0 0 0 0 1 0 0 0 0 0 0 0 0 3 0      |
| FBgn0034970 | yki         | FBgn0035987 | CG3689        | 1.00        | 18 20 17    | 55      | 0 0 1 0 0 0 1 0 1 2 0 0 0 1        |
| FBgn0034970 | yki         | FBgn0002921 | Atpalpa       | 1.00        | 9 13 6      | 28      | 0 0 0 0 0 0 0 0 0 0 0 0 0 0 0      |
| FBgn0034970 | yki         | FBgn0037530 | CG2943        | 1.00        | 22 22 17    | 61      | 0 0 0 0 0 0 0 0 0 0 0 0 0 0 0      |
| FBgn0034970 | yki         | FBgn0028484 | Ack           | 1.00        | 14 13 13    | 40      | 0 0 0 0 0 0 0 0 0 0 0 0 0 0 0      |
| FBgn0034970 | yki         | FBgn0030808 | RhoGAP15B     | 1.00        | 22 19 22    | 63      | 0 0 0 0 0 0 0 0 0 0 0 0 0 0 0      |
| FBgn0034970 | yki         | FBgn0004907 | 14-3-3zeta    | 1.00        | 34 34 41    | 109     | 1 0 0 0 0 0 0 1 1 1 0 0 0 0 0      |
| FBgn0034970 | yki         | FBgn0028490 | CG31705       | 1.00        | 6 8 7       | 21      | 0 0 0 0 0 0 0 0 0 0 0 0 0 0 0      |
| FBgn0034970 | yki         | FBgn0031093 | CG9581        | 1.00        | 16 17 14    | 47      | 0 0 0 0 0 0 0 0 0 0 0 0 0 0 0      |
| FBgn0034970 | yki         | FBgn0035872 | CG1785        | 1.00        | 30 26 27    | 83      | 0 0 0 0 0 0 0 0 0 0 0 0 0 1 0      |
| FBgn0034970 | yki         | FBgn0036373 | CG10741       | 1.00        | 13 11 14    | 38      | 0 0 0 0 0 0 0 0 0 0 0 0 0 0 0      |
| FBgn0034970 | yki         | FBgn0030243 | CG2186        | 1.00        | 8 7 8       | 23      | 0 0 0 0 0 0 0 0 0 0 0 0 0 0 0      |
| FBgn0034970 | yki         | FBgn0036318 | CG11009       | 1.00        | 14 9 14     | 37      | 0 0 0 0 0 0 0 0 0 0 0 0 0 0 0      |
| FBgn0034970 | yki         | FBgn0036451 | CG9425        | 1.00        | 21 20 14    | 55      | 0 0 0 0 0 0 0 0 0 0 0 0 0 0 0      |
| FBgn0034970 | yki         | FBgn0041092 | tai           | 1.00        | 12 10 10    | 32      | 0 0 0 0 0 0 0 0 0 0 0 0 0 0 0      |
| FBgn0034970 | yki         | FBgn0036448 | mop           | 1.00        | 16 16 14    | 46      | 0 0 0 0 0 0 0 0 0 0 0 0 0 0 0      |
| FBgn0034970 | yki         | FBgn0011739 | wt            | 1.00        | 31 27 29    | 87      | 0 0 0 0 0 0 0 0 0 0 0 0 0 0 0      |
| FBgn0034970 | yki         | FBgn0004583 | ex            | 1.00        | 11 8 12     | 31      | 0 0 0 0 0 0 0 0 0 0 0 0 0 0 0      |
| FBgn0034970 | yki         | FBgn0003277 | Rpl1215       | 0.98        | 5 6 4       | 15      | 0 0 0 0 0 0 0 0 0 0 0 0 0 0 0      |
| FBgn0034970 | yki         | FBgn0035715 | CG10103       | 0.96        | 4 6 4       | 14      | 0 0 0 0 0 0 0 0 0 0 0 0 0 0 0      |
| FBgn0034970 | yki         | FBgn0001218 | Hsc70-3       | 0.96        | 79 76 79    | 234     | 10 9 9 6 2 13 16 10 15 20 36 36 17 |
| FBgn0034970 | yki         | FBgn0025885 | Inos          | 0.96        | 6 8 8       | 22      | 0 0 3 5 2 0 0 0 0 1 3 0 0 0 0      |
| FBgn0034970 | yki         | FBgn0011571 | caz           | 0.91        | 5 3 3       | 11      | 0 0 0 0 0 0 0 0 0 0 0 0 0 2 1      |
| FBgn0034970 | yki         | FBgn0034417 | CG15117       | 0.9         | 7 3 7       | 17      | 0 0 0 0 0 0 0 0 0 0 0 0 0 0 0      |
| FBgn0034970 | yki         | FBgn0063485 | Lasp          | 0.9         | 5 3 4       | 12      | 0 0 2 1 0 0 0 1 1 1 0 0 0 0 0      |
| FBgn0034970 | yki         | FBgn0034646 | Rae1          | 0.89        | 4 3 3       | 10      | 0 0 0 0 0 0 0 0 0 0 0 0 0 0 0      |
| FBgn0034970 | yki         | FBgn0033339 | sec31         | 0.86        | 5 3 3       | 11      | 0 0 0 0 0 0 0 0 0 0 0 0 0 0 0      |
| FBgn0034970 | yki         | FBgn0037856 | CG4674        | 0.81        | 2 5 6       | 13      | 0 0 0 0 0 0 0 0 0 0 0 0 0 0 0      |
| FBgn0011739 | wt          | FBgn0034970 | yki           | 1.00        | 18 22 22    | 62      | 0 0 0 0 0 0 0 0 0 0 0 0 0 0 0      |
| FBgn0011739 | wt          | FBgn0027084 | Aats-lys      | 1.00        | 5 6 6       | 17      | 0 0 0 0 0 0 0 0 0 0 1 1 0 0 0 0    |
| FBgn0011739 | wt          | FBgn0039776 | PH4alphaEFB   | 1.00        | 15 13 19    | 47      | 0 0 0 0 0 0 0 0 0 6 8 0 0 0 1      |
| FBgn0011739 | wt          | FBgn0051453 | pch2          | 1.00        | 5 8 7       | 20      | 0 0 0 0 0 0 1 0 0 2 0 0 1 0        |
| FBgn0011739 | wt          | FBgn0038965 | mats          | 1.00        | 7 8 10      | 25      | 0 0 0 0 0 0 0 0 0 0 0 0 0 0 0      |
| FBgn0011739 | wt          | FBgn0010246 | Myo61F        | 1.00        | 31 19 16    | 66      | 0 0 7 3 0 1 0 0 6 13 0 0 0 0 0     |
| FBgn0011739 | wt          | FBgn0263006 | Ca-P60A       | 1.00        | 6 10 6      | 22      | 0 0 0 0 0 0 0 0 0 2 2 0 0 0 0      |
| FBgn0011739 | wt          | FBgn0261524 | lic           | 0.99        | 5 5 8       | 18      | 0 0 0 0 0 0 0 1 0 0 0 0 0 1 0      |
| FBgn0011739 | wt          | FBgn0033062 | Ars2          | 0.99        | 8 5 9       | 22      | 0 0 0 0 0 0 0 0 0 1 4 1 0 2 0      |
| FBgn0011739 | wt          | FBgn0035811 | CG12262       | 0.99        | 6 6 6       | 18      | 0 0 0 0 0 0 2 0 4 3 0 0 0 0 1      |
| FBgn0011739 | wt          | FBgn0263594 | lost          | 0.97        | 4 5 5       | 14      | 0 0 0 0 0 0 2 1 1 1 0 0 1 0        |
| FBgn0011739 | wt          | FBgn0013770 | Cp1           | 0.96        | 5 3 5       | 13      | 0 0 0 0 0 0 0 0 0 1 1 1 0 0 0 1    |
| FBgn0011739 | wt          | FBgn0037312 | CG11999       | 0.94        | 3 4 4       | 11      | 0 0 0 0 0 0 0 0 0 0 0 0 1 0 0 0    |
| FBgn0011739 | wt          | FBgn0028479 | CG4389        | 0.91        | 4 6 4       | 14      | 0 0 1 0 0 0 0 0 0 3 3 1 0 0 0      |
| FBgn0011739 | wt          | FBgn0027329 | Tcp-1zeta     | 0.91        | 7 8 9       | 24      | 0 0 1 0 0 0 4 1 2 6 1 1 1 1 1      |
| FBgn0011739 | wt          | FBgn0011225 | jar           | 0.89        | 26 13 11    | 50      | 6 6 2 0 0 3 0 7 4 3 0 0 0 0 0      |
| FBgn0011739 | wt          | FBgn0004378 | Klp61F        | 0.88        | 3 3 3       | 9       | 0 0 0 0 0 0 0 0 0 1 0 0 0 0 0      |
| FBgn0011739 | wt          | FBgn0014010 | Rab5          | 0.84        | 2 4 4       | 10      | 0 0 0 0 0 0 0 0 0 0 0 0 0 0 0      |
| FBgn0011739 | wt          | FBgn0030612 | CG5599        | 0.82        | 4 4 4       | 12      | 0 0 0 0 0 0 0 0 0 0 1 1 0 0 4 4    |
| FBgn0003345 | sd          | FBgn0034970 | yki           | 1.00        | 60 53 54    | 167     | 0 0 0 0 0 0 0 0 0 0 0 0 0 0 0      |
| FBgn0003345 | sd          | FBgn0036373 | CG10741       | 1.00        | 8 7 8       | 23      | 0 0 0 0 0 0 0 0 0 0 0 0 0 0 0      |
| FBgn0003345 | sd          | FBgn0011739 | wt            | 1.00        | 10 9 10     | 29      | 0 0 0 0 0 0 0 0 0 0 0 0 0 0 0      |
| FBgn0003345 | sd          | FBgn0011225 | jar           | 0.82        | 10 16 12    | 38      | 6 6 2 0 0 3 0 7 4 3 0 0 0 0 0      |
| FBgn0053193 | sav         | FBgn0028331 | I(1)G0289     | 1.00        | 18 22 23    | 63      | 0 0 0 0 0 0 0 0 0 0 0 0 0 0 0      |
| FBgn0053193 | sav         | FBgn0261456 | hpo           | 1.00        | 42 47 50    | 139     | 0 0 0 0 0 0 0 0 0 0 0 0 0 0 0      |
| FBgn0053193 | sav         | FBgn0030734 | CG9911        | 1.00        | 38 40 34    | 112     | 0 0 0 0 0 0 0 0 0 0 0 0 0 0 0      |
| FBgn0053193 | sav         | FBgn0031093 | CG9581        | 1.00        | 37 37 38    | 112     | 0 0 0 0 0 0 0 0 0 0 0 0 0 0 0      |
| FBgn0053193 | sav         | FBgn0004638 | drk           | 0.95        | 4 4 5       | 13      | 0 0 0 0 0 0 0 0 0 0 0 0 0 0 0      |
| FBgn0053193 | sav         | FBgn0020255 | ran           | 0.95        | 4 7 7       | 18      | 1 0 0 0 0 0 0 0 2 0 2 1 0 1 1 0    |
| FBgn0053193 | sav         | FBgn0015019 | Cctgamma      | 0.9         | 3 4 4       | 11      | 0 0 0 0 0 0 0 2 2 0 0 0 0 0 0      |
| FBgn0053193 | sav         | FBgn0003517 | sta           | 0.9         | 3 4 3       | 10      | 1 0 0 0 0 1 1 0 0 0 0 0 0 0 0      |
| FBgn0053193 | sav         | FBgn0010348 | Arf79F        | 0.88        | 7 4 4       | 15      | 0 0 2 1 1 0 0 1 0 0 2 0 0 0 0 0    |
| FBgn0053193 | sav         | FBgn0033264 | Nup50         | 0.88        | 4 3 3       | 10      | 0 0 0 0 0 0 0 0 0 0 2 0 0 0 0 0    |

|             |      |             |               |      |          |     |                                   |
|-------------|------|-------------|---------------|------|----------|-----|-----------------------------------|
| FBgn0053193 | sav  | FBgn0013770 | Cp1           | 0.81 | 2 3 4    | 9   | 0 0 0 0 0 0 0 1 1 1 0 0 0 1       |
| FBgn0086384 | Mer  | FBgn0030086 | CG7033        | 1    | 12 9 8   | 29  | 0 0 2 1 0 0 0 1 1 1 0 0 0 2 2     |
| FBgn0086384 | Mer  | FBgn0261397 | didum         | 1    | 49 33 31 | 113 | 2 8 2 3 0 0 2 14 4 2 0 0 0 0 0    |
| FBgn0086384 | Mer  | FBgn0010246 | Myo61F        | 1    | 34 38 34 | 106 | 0 0 7 3 0 1 0 0 6 13 0 0 0 0 0    |
| FBgn0086384 | Mer  | FBgn0086347 | Myo31DF       | 1    | 20 15 11 | 46  | 0 0 6 1 2 0 0 0 0 0 0 0 0 0 0     |
| FBgn0086384 | Mer  | FBgn0000319 | Chc           | 1    | 22 18 19 | 59  | 3 3 0 0 0 0 1 2 3 5 0 0 0 0 0     |
| FBgn0086384 | Mer  | FBgn0261014 | TER94         | 1    | 12 7 7   | 26  | 0 0 1 0 0 0 0 0 1 0 0 0 0 0 0     |
| FBgn0086384 | Mer  | FBgn0037874 | Tctp          | 0.99 | 6 5 5    | 16  | 0 1 0 0 0 0 0 0 0 1 0 0 0 0 0     |
| FBgn0086384 | Mer  | FBgn0011225 | jar           | 0.99 | 32 18 16 | 66  | 6 6 2 0 0 3 0 7 4 3 0 0 0 0 0     |
| FBgn0086384 | Mer  | FBgn0016693 | Past1         | 0.98 | 11 4 5   | 20  | 1 0 0 0 0 0 0 0 0 0 0 0 0 0 0     |
| FBgn0086384 | Mer  | FBgn0033663 | ERp60         | 0.96 | 7 3 6    | 16  | 0 0 1 0 0 0 0 0 0 0 2 0 0 0 0 0   |
| FBgn0086384 | Mer  | FBgn0039713 | RpS8          | 0.95 | 4 4 4    | 12  | 0 0 0 0 0 0 0 1 1 1 0 2 0 1       |
| FBgn0086384 | Mer  | FBgn0014163 | fax           | 0.95 | 6 3 4    | 13  | 0 0 1 0 0 0 0 0 0 0 2 0 0 0 0 0   |
| FBgn0086384 | Mer  | FBgn0000579 | Eno           | 0.94 | 5 3 4    | 12  | 0 1 0 0 0 0 0 0 0 0 1 1 0 0 0 0   |
| FBgn0086384 | Mer  | FBgn0015795 | Rab7          | 0.94 | 4 3 5    | 12  | 1 1 0 0 0 0 0 0 0 0 0 0 0 0 0 0   |
| FBgn0086384 | Mer  | FBgn0003231 | ref(2)P       | 0.94 | 4 4 3    | 11  | 0 0 0 0 0 0 0 0 0 0 0 0 0 0 0 0   |
| FBgn0086384 | Mer  | FBgn0000253 | Cam           | 0.94 | 11 7 6   | 24  | 1 0 4 3 0 0 0 0 1 3 3 0 0 0 0 0   |
| FBgn0086384 | Mer  | FBgn0086656 | shrb          | 0.93 | 5 5 8    | 18  | 1 1 1 0 0 1 0 0 1 2 2 1 0 0 0     |
| FBgn0086384 | Mer  | FBgn0086356 | tum           | 0.93 | 6 6 5    | 17  | 2 3 0 0 0 0 0 1 1 1 0 2 1 1 0 0   |
| FBgn0086384 | Mer  | FBgn0003279 | RpL4          | 0.93 | 6 3 4    | 13  | 0 0 0 0 0 0 0 1 0 1 0 0 0 0 0 2   |
| FBgn0086384 | Mer  | FBgn0024238 | Fim           | 0.92 | 6 3 3    | 12  | 1 0 0 0 0 0 0 0 0 0 1 0 0 0 0 0   |
| FBgn0086384 | Mer  | FBgn0000317 | ck            | 0.92 | 10 5 3   | 18  | 0 0 0 1 1 0 0 0 0 0 0 0 0 0 0 0   |
| FBgn0086384 | Mer  | FBgn0027329 | Tcp-1zeta     | 0.88 | 8 7 8    | 23  | 0 0 1 0 0 0 4 1 2 6 1 1 1 1 1 1   |
| FBgn0086384 | Mer  | FBgn0020255 | ran           | 0.87 | 6 4 4    | 14  | 1 0 0 1 0 0 2 0 2 1 0 1 1 1 0     |
| FBgn0086384 | Mer  | FBgn0033062 | Ars2          | 0.83 | 5 3 5    | 13  | 0 0 0 0 0 0 0 0 0 1 4 1 0 2 0     |
| FBgn0086384 | Mer  | FBgn0010411 | RpS18         | 0.81 | 4 5 4    | 13  | 0 1 0 0 0 0 0 1 1 2 2 0 0 2 1     |
| FBgn0086384 | Mer  | FBgn0003022 | Ote           | 0.81 | 19 17 11 | 47  | 0 0 9 8 3 1 1 0 1 1 0 0 5 9       |
| FBgn0038965 | mats | FBgn0037607 | CG8036        | 1    | 9 5 8    | 22  | 0 0 0 0 0 0 0 0 0 2 5 0 0 0 0 0   |
| FBgn0038965 | mats | FBgn0028331 | I(1)G0289     | 1    | 25 18 22 | 65  | 0 0 0 0 0 0 0 0 0 0 0 0 0 0 0 0   |
| FBgn0038965 | mats | FBgn0263006 | Ca-P60A       | 1    | 16 10 17 | 43  | 0 0 0 0 0 0 0 0 0 0 2 2 0 0 0 0 0 |
| FBgn0038965 | mats | FBgn0035165 | CG13887       | 1    | 6 7 8    | 21  | 0 0 1 0 0 0 0 0 0 0 0 0 0 0 0 0   |
| FBgn0038965 | mats | FBgn0250814 | CG4169        | 0.99 | 14 12 15 | 41  | 0 0 1 1 0 0 0 9 5 1 2 0 1 4 4     |
| FBgn0038965 | mats | FBgn0035600 | CG4769        | 0.94 | 4 3 4    | 11  | 0 0 0 0 0 0 0 0 0 0 0 0 0 0 0 0   |
| FBgn0038965 | mats | FBgn0039713 | RpS8          | 0.9  | 4 3 4    | 11  | 0 0 0 0 0 0 0 0 0 1 1 1 2 0 1     |
| FBgn0038965 | mats | FBgn0002921 | Atpalpha      | 0.88 | 4 3 7    | 14  | 0 0 0 0 0 0 0 0 0 0 0 0 0 0 0 0   |
| FBgn0038965 | mats | FBgn0014868 | Ost48         | 0.86 | 5 4 2    | 11  | 0 0 0 0 0 0 0 1 0 0 0 0 0 0 0 0   |
| FBgn0038965 | mats | FBgn0035471 | Sc2           | 0.84 | 4 4 4    | 12  | 0 0 0 0 0 0 0 2 1 2 3 0 0 1 0 0   |
| FBgn0038965 | mats | FBgn0026409 | Mpcp          | 0.83 | 3 4 5    | 12  | 0 0 0 0 0 0 0 2 1 2 2 0 0 0 0 1   |
| FBgn0261456 | hpo  | FBgn0023388 | Dap160        | 1    | 7 8 6    | 21  | 0 0 1 0 0 0 0 9 5 1 0 0 0 0 0 0   |
| FBgn0261456 | hpo  | FBgn0024556 | EfTuM         | 1    | 11 9 11  | 31  | 0 0 0 0 0 0 0 0 0 3 3 1 0 1 3     |
| FBgn0261456 | hpo  | FBgn0053193 | sav           | 1    | 28 25 15 | 68  | 0 0 0 0 0 0 0 0 0 0 0 0 0 0 0 0   |
| FBgn0261456 | hpo  | FBgn0039055 | Rassf         | 1    | 47 36 29 | 112 | 0 0 0 0 0 0 0 0 0 0 0 0 0 0 0 0   |
| FBgn0261456 | hpo  | FBgn0010348 | Arf79F        | 0.99 | 7 7 5    | 19  | 0 0 2 1 1 0 1 0 2 2 0 0 0 0 0 0   |
| FBgn0261456 | hpo  | FBgn0035060 | Eps-15        | 0.99 | 5 6 5    | 16  | 0 0 0 0 0 0 0 0 0 0 0 0 0 0 0 0   |
| FBgn0261456 | hpo  | FBgn0020255 | ran           | 0.99 | 7 9 5    | 21  | 1 0 0 1 0 0 2 0 2 1 0 1 1 1 0     |
| FBgn0261456 | hpo  | FBgn0263006 | Ca-P60A       | 0.98 | 4 6 5    | 15  | 0 0 0 0 0 0 0 0 0 0 2 2 0 0 0 0 0 |
| FBgn0261456 | hpo  | FBgn0030086 | CG7033        | 0.91 | 8 7 4    | 19  | 0 0 2 1 0 0 0 1 1 1 0 0 2 2       |
| FBgn0261456 | hpo  | FBgn0000497 | ds            | 0.82 | 11 7 44  | 62  | 0 0 0 0 0 0 0 0 0 0 0 0 0 0 0 0   |
| FBgn0261456 | hpo  | FBgn0010411 | RpS18         | 0.8  | 4 4 5    | 13  | 0 1 0 0 0 0 0 1 1 2 2 0 0 2 1     |
| FBgn0001075 | ft   | FBgn0010434 | cora          | 1    | 6 6 9    | 21  | 0 0 0 0 0 0 0 0 0 0 0 0 0 0 0 0   |
| FBgn0001075 | ft   | FBgn0000064 | Ald           | 1    | 15 14 18 | 47  | 0 0 1 1 0 0 0 0 0 0 0 0 0 0 0 0   |
| FBgn0001075 | ft   | FBgn0033339 | sec31         | 1    | 6 5 8    | 19  | 0 0 0 0 0 0 0 0 0 0 0 0 0 0 0 0   |
| FBgn0001075 | ft   | FBgn0028479 | CG4389        | 1    | 15 14 15 | 44  | 0 0 1 0 0 0 0 0 0 3 3 1 0 0 0 0   |
| FBgn0001075 | ft   | FBgn0263350 | alpha-Adaptin | 1    | 10 8 14  | 32  | 0 0 0 0 0 0 0 0 0 0 0 0 0 0 0 0   |
| FBgn0001075 | ft   | FBgn0261458 | capt          | 1    | 5 6 8    | 19  | 0 0 1 2 1 0 0 0 0 0 0 0 0 0 0 0   |
| FBgn0001075 | ft   | FBgn0037728 | CG16817       | 1    | 7 7 7    | 21  | 0 0 1 1 0 0 0 0 0 0 0 0 0 0 0 0   |
| FBgn0001075 | ft   | FBgn0025885 | Inos          | 1    | 20 20 20 | 60  | 0 0 3 5 2 0 0 0 0 1 3 0 0 0 0 0   |
| FBgn0001075 | ft   | FBgn0010909 | msn           | 1    | 9 5 6    | 20  | 0 0 0 0 0 0 0 0 0 1 0 2 0 0 0 0   |
| FBgn0001075 | ft   | FBgn0014029 | Sep2          | 1    | 11 9 11  | 31  | 0 0 5 6 1 0 0 0 2 2 0 0 0 0 0 0   |
| FBgn0001075 | ft   | FBgn0010380 | Bap           | 1    | 9 8 9    | 26  | 0 0 0 0 0 0 0 0 0 0 0 0 0 0 0 0   |
| FBgn0001075 | ft   | FBgn0024238 | Fim           | 1    | 5 5 5    | 15  | 1 0 0 0 0 0 0 0 0 0 1 0 0 0 0 0   |
| FBgn0001075 | ft   | FBgn0261014 | TER94         | 1    | 6 6 7    | 19  | 0 0 1 0 0 0 0 0 0 1 0 0 0 0 0 0   |
| FBgn0001075 | ft   | FBgn0027835 | Dp1           | 1    | 7 9 8    | 24  | 0 0 1 0 0 0 0 0 0 3 2 1 1 0 0 0   |

|                |                        |               |                                     |
|----------------|------------------------|---------------|-------------------------------------|
| FBgn0001075 ft | FBgn0039302 Nup358     | 1 7 6 11      | 24 0 0 1 0 0 0 0 0 0 0 0 0 0 0      |
| FBgn0001075 ft | FBgn0039924 CG17471    | 0.99 4 7 7    | 18 0 0 0 0 0 0 0 0 0 0 0 0 0 0      |
| FBgn0001075 ft | FBgn0034345 CG5174     | 0.99 6 5 8    | 19 0 0 0 1 0 0 0 0 1 3 0 0 0 0      |
| FBgn0001075 ft | FBgn0031450 Hrs        | 0.99 5 4 6    | 15 0 0 0 0 0 0 0 0 0 0 0 0 0 0      |
| FBgn0001075 ft | FBgn0025352 Thiolase   | 0.99 8 7 5    | 20 0 0 0 0 0 0 0 0 2 3 0 2 1 0      |
| FBgn0001075 ft | FBgn0033890 Ctf4       | 0.98 7 4 8    | 19 0 0 0 0 0 0 0 0 0 0 0 0 0 0      |
| FBgn0001075 ft | FBgn0033264 Nup50      | 0.98 7 4 4    | 15 0 0 0 0 0 0 0 0 2 2 0 0 0 0      |
| FBgn0001075 ft | FBgn0003346 RanGap     | 0.98 4 6 4    | 14 0 0 0 0 0 0 0 0 0 0 0 1 0 0      |
| FBgn0001075 ft | FBgn0029882 CG3226     | 0.98 8 4 8    | 20 0 0 0 0 0 0 0 0 0 0 0 0 0 0      |
| FBgn0001075 ft | FBgn0023213 eIF4G      | 0.97 7 6 4    | 17 0 0 0 0 0 0 1 1 2 1 0 0 0 0      |
| FBgn0001075 ft | FBgn0011704 RnrS       | 0.94 4 3 4    | 11 0 0 0 0 0 0 0 0 0 0 0 0 0 0      |
| FBgn0001075 ft | FBgn0022343 CG3760     | 0.93 6 3 4    | 13 0 0 3 1 0 0 0 0 0 1 0 0 0 0      |
| FBgn0001075 ft | FBgn0029687 Vap-33-1   | 0.92 3 3 6    | 12 0 0 0 0 0 0 0 0 0 0 0 0 0 0      |
| FBgn0001075 ft | FBgn0000578 ena        | 0.91 3 3 4    | 10 0 0 0 0 0 0 0 0 0 1 0 0 0 0      |
| FBgn0001075 ft | FBgn0013726 pnut       | 0.91 7 9 13   | 29 0 1 3 5 2 1 0 0 3 5 0 0 0 0      |
| FBgn0001075 ft | FBgn0063485 Lasp       | 0.9 5 3 5     | 13 0 0 2 1 0 0 0 1 1 1 0 0 0 0      |
| FBgn0001075 ft | FBgn0025865 Cortactin  | 0.9 3 3 5     | 11 0 0 0 0 0 0 0 0 0 0 0 0 1 0      |
| FBgn0001075 ft | FBgn0003600 Su(var)3-9 | 0.89 6 3 3    | 12 0 0 0 0 0 0 0 0 1 3 0 0 0 1      |
| FBgn0001075 ft | FBgn0038965 mats       | 0.89 3 5 8    | 16 0 0 0 0 0 0 0 0 0 0 0 0 0 0      |
| FBgn0001075 ft | FBgn0024509 sec13      | 0.88 3 3 3    | 9 0 0 0 0 0 0 0 0 1 0 0 0 0 0       |
| FBgn0001075 ft | FBgn0003392 shi        | 0.88 4 3 3    | 10 0 0 0 0 0 0 0 0 1 0 0 0 0 0      |
| FBgn0001075 ft | FBgn0011771 Hem        | 0.87 4 4 3    | 11 0 0 0 0 0 0 0 0 0 0 0 0 0 0      |
| FBgn0001075 ft | FBgn0035424 CG11505    | 0.86 6 5 6    | 17 1 0 2 1 0 0 0 0 2 2 2 1 0 0      |
| FBgn0001075 ft | FBgn0025457 Bub3       | 0.83 4 2 4    | 10 0 0 0 0 0 0 0 0 1 1 0 0 1 0      |
| FBgn0001075 ft | FBgn00261119 Prp19     | 0.81 5 2 3    | 10 0 0 1 0 0 0 0 0 0 0 1 0 0 0 0    |
| FBgn0000658 fj | FBgn0027084 Aats-lys   | 1 8 8 6       | 22 0 0 0 0 0 0 0 0 1 1 1 0 0 0 0    |
| FBgn0000658 fj | FBgn0010246 Myo61F     | 1 4 1 29 15   | 85 0 0 7 3 0 1 0 0 0 6 13 0 0 0 0   |
| FBgn0000658 fj | FBgn0028479 CG4389     | 1 13 8 10     | 31 0 0 1 0 0 0 0 0 0 3 3 1 0 0 0    |
| FBgn0000658 fj | FBgn0263006 Ca-P60A    | 1 11 13 10    | 34 0 0 0 0 0 0 0 0 0 2 2 0 0 0 0    |
| FBgn0000658 fj | FBgn0261794 kcc        | 1 20 22 17    | 59 0 0 0 0 0 0 0 0 0 0 0 0 0 0      |
| FBgn0000658 fj | FBgn0033062 Ars2       | 1 12 12 9     | 33 0 0 0 0 0 0 0 0 1 4 1 0 2 0      |
| FBgn0000658 fj | FBgn0010774 Aly        | 0.98 4 4 4    | 12 0 0 0 0 0 0 0 0 0 0 0 0 0 0      |
| FBgn0000658 fj | FBgn0037312 CG11999    | 0.96 4 5 3    | 12 0 0 0 0 0 0 0 0 0 0 0 0 1 0 0    |
| FBgn0000658 fj | FBgn0004378 Klp61F     | 0.95 4 3 5    | 12 0 0 0 0 0 0 0 0 1 1 0 0 0 0      |
| FBgn0000658 fj | FBgn0000253 Cam        | 0.89 8 9 5    | 22 1 0 4 3 0 0 0 1 3 3 0 0 0 0      |
| FBgn0004583 ex | FBgn0015245 Hsp60      | 1 93 104 89   | 286 0 0 0 0 0 0 0 0 1 0 24 25 0 0   |
| FBgn0004583 ex | FBgn0036892 CG8798     | 1 11 14 13    | 38 0 0 0 0 0 0 0 0 1 0 8 10 0 0     |
| FBgn0004583 ex | FBgn0030993 Mec2       | 1 15 15 11    | 41 0 0 2 2 1 1 6 3 2 2 1 1 1 1 1    |
| FBgn0004583 ex | FBgn0004638 drk        | 1 7 6 7       | 20 0 0 0 0 0 0 0 0 0 0 0 0 0 0 0    |
| FBgn0004583 ex | FBgn0020255 ran        | 0.9 5 4 5     | 14 1 0 0 1 0 0 2 0 2 1 0 1 1 0      |
| FBgn0004583 ex | FBgn0004227 nonA       | 0.82 9 6 7    | 22 0 0 3 1 0 0 1 1 0 0 1 1 2 8      |
| FBgn0000497 ds | FBgn0028331 l(1)G0289  | 1 9 11 15     | 35 0 0 0 0 0 0 0 0 0 0 0 0 0 0 0    |
| FBgn0000497 ds | FBgn0028479 CG4389     | 1 12 11 8     | 31 0 0 1 0 0 0 0 0 0 3 3 1 0 0 0    |
| FBgn0000497 ds | FBgn0027598 cindr      | 1 8 12 7      | 27 0 0 1 0 0 0 0 0 1 2 1 1 1 1 1    |
| FBgn0000497 ds | FBgn0263006 Ca-P60A    | 1 13 11 12    | 36 0 0 0 0 0 0 0 0 0 2 2 0 0 0 0    |
| FBgn0000497 ds | FBgn0023423 slmb       | 1 9 12 12     | 33 0 0 0 0 0 0 0 0 0 0 0 0 0 0 0    |
| FBgn0000497 ds | FBgn0025352 Thiolase   | 1 10 8 8      | 26 0 0 0 0 0 0 0 0 2 3 0 2 1 0      |
| FBgn0000497 ds | FBgn0250814 CG4169     | 0.97 16 12 12 | 40 0 0 1 1 0 0 9 5 1 2 0 1 4 4      |
| FBgn0000497 ds | FBgn0032393 CG12264    | 0.92 3 4 3    | 10 0 0 0 0 0 0 0 0 0 1 2 0 0 0 0    |
| FBgn0000497 ds | FBgn0025637 skpA       | 0.88 3 5 3    | 11 0 0 0 0 0 0 0 0 0 0 0 0 0 0 0    |
| FBgn0000497 ds | FBgn0026409 Mpcp       | 0.88 4 4 4    | 12 0 0 0 0 0 0 2 1 2 2 0 0 0 1      |
| FBgn0000497 ds | FBgn0031093 CG9581     | 0.86 8 10 7   | 25 0 0 0 0 0 0 0 0 0 0 0 0 0 0 0    |
| FBgn0000497 ds | FBgn0025885 Inos       | 0.84 6 6 5    | 17 0 0 3 5 2 0 0 0 1 3 0 0 0 0      |
| FBgn0000497 ds | FBgn0052109 CG32109    | 0.82 3 3 3    | 9 0 0 0 0 0 0 0 0 0 0 0 0 0 0 0     |
| FBgn0000497 ds | FBgn0037894 Ranbp9     | 0.8 6 7 2     | 15 0 0 0 0 0 0 0 0 0 2 0 0 0 1 1    |
| FBgn0262029 d  | FBgn0250789 alpha-Spec | 1 55 47 53    | 155 7 1 14 10 1 2 0 0 19 26 8 7 6 3 |
| FBgn0262029 d  | FBgn0034264 CG10933    | 1 7 5 10      | 22 0 0 0 0 0 0 0 0 0 0 0 0 0 0 0    |
| FBgn0262029 d  | FBgn0029903 pod1       | 1 7 5 10      | 22 0 0 0 0 0 0 0 0 0 0 0 0 0 0 0    |
| FBgn0262029 d  | FBgn0000253 Cam        | 1 16 11 14    | 41 1 0 4 3 0 0 0 1 3 3 0 0 0 0 0    |
| FBgn0262029 d  | FBgn0086656 shrb       | 0.99 8 6 10   | 24 1 1 1 0 0 1 0 0 1 2 2 1 0 0      |
| FBgn0262029 d  | FBgn0046214 vig2       | 0.98 9 8 10   | 27 0 0 3 0 0 0 3 1 2 1 3 1 1 1 1    |
| FBgn0262029 d  | FBgn0003261 Rm62       | 0.97 18 15 19 | 52 1 0 3 0 0 0 2 1 9 9 3 4 3 2      |
| FBgn0262029 d  | FBgn0025865 Cortactin  | 0.97 4 4 4    | 12 0 0 0 0 0 0 0 0 0 0 0 0 0 0 0    |



|               |                      |      |          |    |                              |
|---------------|----------------------|------|----------|----|------------------------------|
| FBgn0262029 d | FBgn0002466 sti      | 0.96 | 6 5 11   | 22 | 1 0 0 0 0 0 0 1 2 2 1 1 0 0  |
| FBgn0262029 d | FBgn0032731 CG10641  | 0.96 | 12 10 10 | 32 | 0 0 5 5 2 0 0 0 4 4 3 1 0 0  |
| FBgn0262029 d | FBgn0002638 Bjl      | 0.96 | 19 8 23  | 50 | 0 0 6 3 0 0 0 0 0 0 0 3 10 0 |
| FBgn0262029 d | FBgn0004167 kst      | 0.96 | 14 12 19 | 45 | 0 0 2 0 0 0 0 0 4 7 6 5 0 0  |
| FBgn0262029 d | FBgn0086356 tum      | 0.95 | 8 5 9    | 22 | 2 3 0 0 0 0 1 1 0 2 1 1 0 0  |
| FBgn0262029 d | FBgn0003231 ref(2)P  | 0.94 | 4 3 4    | 11 | 0 0 0 0 0 0 0 0 0 0 0 0 0 0  |
| FBgn0262029 d | FBgn0028734 Fmr1     | 0.93 | 13 10 11 | 34 | 1 1 6 0 0 0 1 1 4 5 1 3 2 0  |
| FBgn0262029 d | FBgn0010173 RpA-70   | 0.91 | 8 12 8   | 28 | 0 0 0 0 0 0 0 0 2 1 2 4 5 7  |
| FBgn0262029 d | FBgn0029687 Vap-33-1 | 0.91 | 4 3 3    | 10 | 0 0 0 0 0 0 0 0 0 0 0 0 0 0  |
| FBgn0262029 d | FBgn0030612 CG5599   | 0.91 | 6 5 4    | 15 | 0 0 0 0 0 0 0 0 1 1 0 0 4 4  |
| FBgn0262029 d | FBgn0033663 ERp60    | 0.9  | 3 4 3    | 10 | 0 0 1 0 0 0 0 0 0 2 0 0 0 0  |
| FBgn0262029 d | FBgn0005648 Pabp2    | 0.88 | 3 3 3    | 9  | 0 0 1 0 0 0 0 0 0 0 0 0 0 0  |
| FBgn0262029 d | FBgn0010774 Aly      | 0.88 | 3 3 3    | 9  | 0 0 0 0 0 0 0 0 0 0 0 0 0 0  |
| FBgn0262029 d | FBgn0024987 ssx      | 0.85 | 9 6 7    | 22 | 0 0 1 0 0 0 2 1 2 3 2 3 2 1  |
| FBgn0262029 d | FBgn0027616 YT521-B  | 0.81 | 3 2 4    | 9  | 1 0 0 0 0 0 0 0 1 1 0 0 0 0  |
| FBgn0262029 d | FBgn0037756 CG8507   | 0.81 | 3 2 4    | 9  | 0 0 2 1 0 0 0 0 0 0 0 0 0 0  |









Type of file: table

Label: Table S2

Filename: 2013-Kwon-Science-Hippo\_table\_S2.xlsx

## Sheet1

| Fly GeneID | FlyBaseID   | Fly Symbol | Human GeneID | Human Symbol  | DIOPT Score |
|------------|-------------|------------|--------------|---------------|-------------|
| 35788      | FBgn0005648 | Pabp2      | 8106         | PABPN1        | 9           |
| 35788      | FBgn0005648 | Pabp2      | 390748       | PABPN1L       | 3           |
| 35788      | FBgn0005648 | Pabp2      | 100529063    | BCL2L2-PABPN1 | 2           |
| 35788      | FBgn0005648 | Pabp2      | 599          | BCL2L2        | 1           |
| 31849      | FBgn0014868 | Ost48      | 1650         | DDOST         | 9           |
| 41027      | FBgn0037607 | CG8036     | 84076        | TKTL2         | 9           |
| 41027      | FBgn0037607 | CG8036     | 7086         | TKT           | 8           |
| 41027      | FBgn0037607 | CG8036     | 8277         | TKTL1         | 5           |
| 49297      | FBgn0263006 | Ca-P60A    | 487          | ATP2A1        | 10          |
| 49297      | FBgn0263006 | Ca-P60A    | 487          | ATP2A1        | 10          |
| 49297      | FBgn0263006 | Ca-P60A    | 487          | ATP2A1        | 10          |
| 49297      | FBgn0263006 | Ca-P60A    | 488          | ATP2A2        | 7           |
| 49297      | FBgn0263006 | Ca-P60A    | 488          | ATP2A2        | 7           |
| 49297      | FBgn0263006 | Ca-P60A    | 488          | ATP2A2        | 7           |
| 49297      | FBgn0263006 | Ca-P60A    | 489          | ATP2A3        | 5           |
| 49297      | FBgn0263006 | Ca-P60A    | 9914         | ATP2C2        | 1           |
| 49297      | FBgn0263006 | Ca-P60A    | 27032        | ATP2C1        | 1           |
| 37014      | FBgn0034264 | CG10933    | 2885         | GRB2          | 1           |
| 37014      | FBgn0034264 | CG10933    | 10750        | GRAP          | 1           |
| 35671      | FBgn0025885 | Inos       | 51477        | ISYNA1        | 9           |
| 39083      | FBgn0035987 | CG3689     | 11051        | NUDT21        | 10          |
| 37292      | FBgn0010411 | RpS18      | 6222         | RPS18         | 8           |
| 37961      | FBgn0035060 | Eps-15     | 58513        | EPS15L1       | 10          |
| 37961      | FBgn0035060 | Eps-15     | 2060         | EPS15         | 7           |
| 38153      | FBgn0010246 | Myo61F     | 4641         | MYO1C         | 8           |
| 38153      | FBgn0010246 | Myo61F     | 283446       | MYO1H         | 4           |
| 38153      | FBgn0010246 | Myo61F     | 4640         | MYO1A         | 2           |
| 38153      | FBgn0010246 | Myo61F     | 4642         | MYO1D         | 2           |
| 38153      | FBgn0010246 | Myo61F     | 4642         | MYO1D         | 2           |
| 38153      | FBgn0010246 | Myo61F     | 4643         | MYO1E         | 2           |
| 38153      | FBgn0010246 | Myo61F     | 64005        | MYO1G         | 2           |
| 38153      | FBgn0010246 | Myo61F     | 4430         | MYO1B         | 2           |
| 38153      | FBgn0010246 | Myo61F     | 4542         | MYO1F         | 1           |
| 37784      | FBgn0025352 | Thiolase   | 3032         | HADHB         | 10          |
| 40462      | FBgn0011771 | Hem        | 10787        | NCKAP1        | 10          |
| 40462      | FBgn0011771 | Hem        | 3071         | NCKAP1L       | 5           |
| 32721      | FBgn0024238 | Fim        | 3936         | LCP1          | 9           |
| 32721      | FBgn0024238 | Fim        | 5358         | PLS3          | 9           |
| 32721      | FBgn0024238 | Fim        | 5357         | PLS1          | 7           |
| 35784      | FBgn0033264 | Nup50      | 10762        | NUP50         | 9           |
| 43349      | FBgn0003279 | RpL4       | 6124         | RPL4          | 10          |
| 32603      | FBgn0004227 | nonA       | 6421         | SFPQ          | 8           |
| 32603      | FBgn0004227 | nonA       | 4841         | NONO          | 6           |
| 32603      | FBgn0004227 | nonA       | 55269        | PSPC1         | 5           |
| 38864      | FBgn0035811 | CG12262    | 34           | ACADM         | 9           |
| 38864      | FBgn0035811 | CG12262    | 34           | ACADM         | 9           |
| 38864      | FBgn0035811 | CG12262    | 34           | ACADM         | 9           |
| 38864      | FBgn0035811 | CG12262    | 35           | ACADS         | 1           |
| 38864      | FBgn0035811 | CG12262    | 35           | ACADS         | 1           |
| 38864      | FBgn0035811 | CG12262    | 35           | ACADS         | 1           |

Sheet1

|       |             |               |                        |    |
|-------|-------------|---------------|------------------------|----|
| 38864 | FBgn0035811 | CG12262       | 36 ACADSB              | 1  |
| 38864 | FBgn0035811 | CG12262       | 27034 ACAD8            | 1  |
| 38669 | FBgn0002638 | Bj1           | 1104 RCC1              | 9  |
| 36040 | FBgn0261014 | TER94         | 7415 VCP               | 10 |
| 36040 | FBgn0261014 | TER94         | 7415 VCP               | 10 |
| 31838 | FBgn0030086 | CG7033        | 10576 CCT2             | 10 |
| 31838 | FBgn0030086 | CG7033        | 10574 CCT7             | 1  |
| 31838 | FBgn0030086 | CG7033        | 6950 TCP1              | 1  |
| 32587 | FBgn0011571 | caz           | 2521 FUS               | 7  |
| 32587 | FBgn0011571 | caz           | 2521 FUS               | 7  |
| 32587 | FBgn0011571 | caz           | 2130 EWSR1             | 4  |
| 32587 | FBgn0011571 | caz           | 2130 EWSR1             | 4  |
| 32587 | FBgn0011571 | caz           | 8148 TAF15             | 3  |
| 32587 | FBgn0011571 | caz           | 8148 TAF15             | 3  |
| 33211 | FBgn0263350 | alpha-Adaptin | 161 AP2A2              | 9  |
| 33211 | FBgn0263350 | alpha-Adaptin | 160 AP2A1              | 8  |
| 37197 | FBgn0034417 | CG15117       | 2990 GUSB              | 10 |
| 37197 | FBgn0034417 | CG15117       | 100653061 LOC100653061 | 1  |
| 39444 | FBgn0052109 | CG32109       | 79719 AAGAB            | 3  |
| 37987 | FBgn0022343 | CG3760        | 55573 CDV3             | 5  |
| 32441 | FBgn0030612 | CG5599        | 1629 DBT               | 9  |
| 32441 | FBgn0030612 | CG5599        | 1629 DBT               | 9  |
| 32441 | FBgn0030612 | CG5599        | 1629 DBT               | 9  |
| 32441 | FBgn0030612 | CG5599        | 1629 DBT               | 9  |
| 32686 | FBgn0030808 | RhoGAP15B     | 64411 ARAP3            | 6  |
| 32686 | FBgn0030808 | RhoGAP15B     | 116985 ARAP1           | 5  |
| 32686 | FBgn0030808 | RhoGAP15B     | 116985 ARAP1           | 5  |
| 32686 | FBgn0030808 | RhoGAP15B     | 116985 ARAP1           | 5  |
| 32686 | FBgn0030808 | RhoGAP15B     | 116985 ARAP1           | 5  |
| 32686 | FBgn0030808 | RhoGAP15B     | 116984 ARAP2           | 4  |
| 37800 | FBgn0261794 | kcc           | 6560 SLC12A4           | 9  |
| 37800 | FBgn0261794 | kcc           | 9990 SLC12A6           | 7  |
| 37800 | FBgn0261794 | kcc           | 10723 SLC12A7          | 5  |
| 37800 | FBgn0261794 | kcc           | 57468 SLC12A5          | 5  |
| 36270 | FBgn0033663 | ERp60         | 2923 PDIA3             | 10 |
| 36270 | FBgn0033663 | ERp60         | 5034 P4HB              | 3  |
| 36270 | FBgn0033663 | ERp60         | 9601 PDIA4             | 3  |
| 36270 | FBgn0033663 | ERp60         | 64714 PDIA2            | 1  |
| 36270 | FBgn0033663 | ERp60         | 204474 PDILT           | 1  |
| 34577 | FBgn0028490 | CG31705       |                        |    |
| 35877 | FBgn0033339 | sec31         | 22872 SEC31A           | 9  |
| 35877 | FBgn0033339 | sec31         | 25956 SEC31B           | 8  |
| 37201 | FBgn0000578 | ena           | 55740 ENAH             | 7  |
| 37201 | FBgn0000578 | ena           | 7408 VASP              | 4  |
| 37201 | FBgn0000578 | ena           | 51466 EVL              | 4  |
| 33017 | FBgn0031093 | CG9581        | 63929 XPNPEP3          | 7  |
| 33017 | FBgn0031093 | CG9581        | 9978 RBX1              | 4  |
| 33017 | FBgn0031093 | CG9581        | 5184 PEPD              | 3  |
| 33017 | FBgn0031093 | CG9581        | 5184 PEPD              | 3  |
| 33017 | FBgn0031093 | CG9581        | 5184 PEPD              | 3  |
| 33017 | FBgn0031093 | CG9581        | 5184 PEPD              | 3  |



Sheet1

|       |             |            |        |         |    |
|-------|-------------|------------|--------|---------|----|
| 36059 | FBgn0004907 | 14-3-3zeta | 7534   | YWHAZ   | 9  |
| 36059 | FBgn0004907 | 14-3-3zeta | 7529   | YWHAB   | 7  |
| 36059 | FBgn0004907 | 14-3-3zeta | 7531   | YWHAE   | 3  |
| 36059 | FBgn0004907 | 14-3-3zeta | 2810   | SFN     | 3  |
| 36059 | FBgn0004907 | 14-3-3zeta | 10971  | YWHAQ   | 2  |
| 36059 | FBgn0004907 | 14-3-3zeta | 7533   | YWHAH   | 2  |
| 36059 | FBgn0004907 | 14-3-3zeta | 7532   | YWHAG   | 2  |
| 38135 | FBgn0004378 | Klp61F     | 3832   | KIF11   | 9  |
| 38135 | FBgn0004378 | Klp61F     | 3832   | KIF11   | 9  |
| 36538 | FBgn0086356 | tum        | 29127  | RACGAP1 | 10 |
| 35223 | FBgn0003346 | RanGap     | 5905   | RANGAP1 | 10 |
| 33627 | FBgn0001075 | ft         | 79633  | FAT4    | 9  |
| 33627 | FBgn0001075 | ft         | 79633  | FAT4    | 9  |
| 33627 | FBgn0001075 | ft         | 120114 | FAT3    | 2  |
| 33627 | FBgn0001075 | ft         | 64072  | CDH23   | 2  |
| 33627 | FBgn0001075 | ft         | 64072  | CDH23   | 2  |
| 33627 | FBgn0001075 | ft         | 64072  | CDH23   | 2  |
| 33627 | FBgn0001075 | ft         | 64072  | CDH23   | 2  |
| 33627 | FBgn0001075 | ft         | 64072  | CDH23   | 2  |
| 33627 | FBgn0001075 | ft         | 2195   | FAT1    | 2  |
| 33627 | FBgn0001075 | ft         | 2196   | FAT2    | 2  |
| 33627 | FBgn0001075 | ft         | 54798  | DCHS2   | 1  |
| 33627 | FBgn0001075 | ft         | 54798  | DCHS2   | 1  |
| 33627 | FBgn0001075 | ft         | 54798  | DCHS2   | 1  |
| 33627 | FBgn0001075 | ft         | 8642   | DCHS1   | 1  |
| 34179 | FBgn0262029 | d          | 25     | ABL1    | 1  |
| 34179 | FBgn0262029 | d          | 80179  | MYO19   | 1  |
| 31106 | FBgn0003517 | sta        | 3921   | RPSA    | 9  |
| 31106 | FBgn0003517 | sta        | 220885 | RPSAP15 | 1  |
| 32017 | FBgn0030243 | CG2186     | 155435 | RBM33   | 2  |
| 32017 | FBgn0030243 | CG2186     | 1822   | ATN1    | 1  |
| 32017 | FBgn0030243 | CG2186     | 5545   | PRB4    | 1  |
| 32017 | FBgn0030243 | CG2186     | 5554   | PRH1    | 1  |
| 32017 | FBgn0030243 | CG2186     | 5542   | PRB1    | 1  |
| 32017 | FBgn0030243 | CG2186     | 5555   | PRH2    | 1  |
| 37123 | FBgn0261119 | Prp19      | 27339  | PRPF19  | 9  |
| 35680 | FBgn0261397 | didum      | 4644   | MYO5A   | 9  |
| 35680 | FBgn0261397 | didum      | 55930  | MYO5C   | 8  |
| 35680 | FBgn0261397 | didum      | 4645   | MYO5B   | 7  |
| 35680 | FBgn0261397 | didum      | 4622   | MYH4    | 1  |
| 35680 | FBgn0261397 | didum      | 4625   | MYH7    | 1  |
| 35680 | FBgn0261397 | didum      | 4625   | MYH7    | 1  |
| 35680 | FBgn0261397 | didum      | 4625   | MYH7    | 1  |
| 35680 | FBgn0261397 | didum      | 4625   | MYH7    | 1  |
| 35680 | FBgn0261397 | didum      | 4625   | MYH7    | 1  |
| 35680 | FBgn0261397 | didum      | 4625   | MYH7    | 1  |
| 35680 | FBgn0261397 | didum      | 4625   | MYH7    | 1  |
| 35680 | FBgn0261397 | didum      | 4625   | MYH7    | 1  |
| 35680 | FBgn0261397 | didum      | 4625   | MYH7    | 1  |
| 35680 | FBgn0261397 | didum      | 4625   | MYH7    | 1  |
| 35680 | FBgn0261397 | didum      | 4625   | MYH7    | 1  |
| 35680 | FBgn0261397 | didum      | 8735   | MYH13   | 1  |
| 35680 | FBgn0261397 | didum      | 4627   | MYH9    | 1  |
| 35680 | FBgn0261397 | didum      | 4627   | MYH9    | 1  |

Sheet1

|       |             |         |       |         |    |
|-------|-------------|---------|-------|---------|----|
| 35680 | FBgn0261397 | didum   | 4627  | MYH9    | 1  |
| 35680 | FBgn0261397 | didum   | 4627  | MYH9    | 1  |
| 35680 | FBgn0261397 | didum   | 4627  | MYH9    | 1  |
| 35680 | FBgn0261397 | didum   | 4627  | MYH9    | 1  |
| 35680 | FBgn0261397 | didum   | 4627  | MYH9    | 1  |
| 35680 | FBgn0261397 | didum   | 4627  | MYH9    | 1  |
| 35680 | FBgn0261397 | didum   | 4627  | MYH9    | 1  |
| 35680 | FBgn0261397 | didum   | 4627  | MYH9    | 1  |
| 35680 | FBgn0261397 | didum   | 4628  | MYH10   | 1  |
| 35680 | FBgn0261397 | didum   | 57644 | MYH7B   | 1  |
| 35680 | FBgn0261397 | didum   | 57644 | MYH7B   | 1  |
| 35680 | FBgn0261397 | didum   | 4619  | MYH1    | 1  |
| 35680 | FBgn0261397 | didum   | 4629  | MYH11   | 1  |
| 35680 | FBgn0261397 | didum   | 4621  | MYH3    | 1  |
| 35680 | FBgn0261397 | didum   | 4621  | MYH3    | 1  |
| 35680 | FBgn0261397 | didum   | 4621  | MYH3    | 1  |
| 35680 | FBgn0261397 | didum   | 4621  | MYH3    | 1  |
| 35680 | FBgn0261397 | didum   | 4626  | MYH8    | 1  |
| 35680 | FBgn0261397 | didum   | 4626  | MYH8    | 1  |
| 35680 | FBgn0261397 | didum   | 22989 | MYH15   | 1  |
| 35680 | FBgn0261397 | didum   | 79784 | MYH14   | 1  |
| 35680 | FBgn0261397 | didum   | 79784 | MYH14   | 1  |
| 35680 | FBgn0261397 | didum   | 4624  | MYH6    | 1  |
| 35680 | FBgn0261397 | didum   | 4624  | MYH6    | 1  |
| 35680 | FBgn0261397 | didum   | 4624  | MYH6    | 1  |
| 35680 | FBgn0261397 | didum   | 4624  | MYH6    | 1  |
| 35680 | FBgn0261397 | didum   | 4624  | MYH6    | 1  |
| 35680 | FBgn0261397 | didum   | 4624  | MYH6    | 1  |
| 35680 | FBgn0261397 | didum   | 4624  | MYH6    | 1  |
| 35680 | FBgn0261397 | didum   | 4624  | MYH6    | 1  |
| 35680 | FBgn0261397 | didum   | 4620  | MYH2    | 1  |
| 40559 | FBgn0263594 | lost    | 64779 | MTHFSD  | 9  |
| 44438 | FBgn0024556 | EfTuM   | 7284  | TUFM    | 10 |
| 44438 | FBgn0024556 | EfTuM   | 7284  | TUFM    | 10 |
| 37117 | FBgn0034345 | CG5174  | 7165  | TPD52L2 | 6  |
| 37117 | FBgn0034345 | CG5174  | 7163  | TPD52   | 4  |
| 37117 | FBgn0034345 | CG5174  | 7164  | TPD52L1 | 4  |
| 37117 | FBgn0034345 | CG5174  | 89882 | TPD52L3 | 3  |
| 36551 | FBgn0033890 | Ctf4    | 11169 | WDHD1   | 10 |
| 39846 | FBgn0250814 | CG4169  | 7385  | UQCRC2  | 10 |
| 43839 | FBgn0023213 | eIF4G   | 8672  | EIF4G3  | 8  |
| 43839 | FBgn0023213 | eIF4G   | 1981  | EIF4G1  | 8  |
| 32133 | FBgn0001218 | Hsc70-3 | 3309  | HSPA5   | 8  |
| 32133 | FBgn0001218 | Hsc70-3 | 3305  | HSPA1L  | 2  |
| 32133 | FBgn0001218 | Hsc70-3 | 3303  | HSPA1A  | 2  |
| 32133 | FBgn0001218 | Hsc70-3 | 3306  | HSPA2   | 2  |
| 32133 | FBgn0001218 | Hsc70-3 | 3312  | HSPA8   | 2  |
| 32133 | FBgn0001218 | Hsc70-3 | 3304  | HSPA1B  | 2  |
| 32133 | FBgn0001218 | Hsc70-3 | 3310  | HSPA6   | 2  |
| 43490 | FBgn0025457 | Bub3    | 9184  | BUB3    | 10 |
| 45233 | FBgn0261458 | capt    | 10487 | CAP1    | 9  |

Sheet1

|       |             |          |        |           |    |
|-------|-------------|----------|--------|-----------|----|
| 45233 | FBgn0261458 | capt     | 10486  | CAP2      | 7  |
| 39429 | FBgn0002466 | sti      | 11113  | CIT       | 8  |
| 39429 | FBgn0002466 | sti      | 80254  | CEP63     | 1  |
| 39429 | FBgn0002466 | sti      | 80254  | CEP63     | 1  |
| 39429 | FBgn0002466 | sti      | 6093   | ROCK1     | 1  |
| 39429 | FBgn0002466 | sti      | 9475   | ROCK2     | 1  |
| 39429 | FBgn0002466 | sti      | 1760   | DMPK      | 1  |
| 37116 | FBgn0027835 | Dp1      | 3069   | HDLBP     | 10 |
| 44030 | FBgn0010909 | msn      | 23043  | TNIK      | 7  |
| 44030 | FBgn0010909 | msn      | 23043  | TNIK      | 7  |
| 44030 | FBgn0010909 | msn      | 50488  | MINK1     | 7  |
| 44030 | FBgn0010909 | msn      | 9448   | MAP4K4    | 7  |
| 44030 | FBgn0010909 | msn      | 203447 | NRK       | 3  |
| 44030 | FBgn0010909 | msn      | 140469 | MYO3B     | 1  |
| 32045 | FBgn0015245 | Hsp60    | 3329   | HSPD1     | 10 |
| 32045 | FBgn0015245 | Hsp60    | 3329   | HSPD1     | 10 |
| 34613 | FBgn0032393 | CG12264  | 9054   | NFS1      | 6  |
| 34613 | FBgn0032393 | CG12264  | 51540  | SCLY      | 1  |
| 31086 | FBgn0024987 | ssx      | 1993   | ELAVL2    | 1  |
| 31086 | FBgn0024987 | ssx      | 1995   | ELAVL3    | 1  |
| 31086 | FBgn0024987 | ssx      | 1994   | ELAVL1    | 1  |
| 31086 | FBgn0024987 | ssx      | 1996   | ELAVL4    | 1  |
| 39460 | FBgn0036318 | CG11009  | 23558  | WBP2      | 9  |
| 39460 | FBgn0036318 | CG11009  | 164684 | WBP2NL    | 5  |
| 44029 | FBgn0010774 | Aly      | 10189  | ALYREF    | 10 |
| 44029 | FBgn0010774 | Aly      | 84271  | POLDIP3   | 1  |
| 41569 | FBgn0016693 | Past1    | 30845  | EHD3      | 8  |
| 41569 | FBgn0016693 | Past1    | 30845  | EHD3      | 8  |
| 41569 | FBgn0016693 | Past1    | 10938  | EHD1      | 8  |
| 41569 | FBgn0016693 | Past1    | 30846  | EHD2      | 7  |
| 41569 | FBgn0016693 | Past1    | 30844  | EHD4      | 6  |
| 41341 | FBgn0037874 | Tctp     | 7178   | TPT1      | 10 |
| 41341 | FBgn0037874 | Tctp     | 59347  | FKSG2     | 1  |
| 41341 | FBgn0037874 | Tctp     | 392490 | FLJ44635  | 1  |
| 41341 | FBgn0037874 | Tctp     | 389787 | LOC389787 | 1  |
| 32100 | FBgn0003277 | Rpll215  | 5430   | POLR2A    | 7  |
| 32100 | FBgn0003277 | Rpll215  | 643664 | SLC35G6   | 3  |
| 32100 | FBgn0003277 | Rpll215  | 11128  | POLR3A    | 3  |
| 32100 | FBgn0003277 | Rpll215  | 25885  | POLR1A    | 1  |
| 48971 | FBgn0002921 | Atpalpha | 476    | ATP1A1    | 8  |
| 48971 | FBgn0002921 | Atpalpha | 478    | ATP1A3    | 8  |
| 48971 | FBgn0002921 | Atpalpha | 478    | ATP1A3    | 8  |
| 48971 | FBgn0002921 | Atpalpha | 477    | ATP1A2    | 6  |
| 48971 | FBgn0002921 | Atpalpha | 477    | ATP1A2    | 6  |
| 48971 | FBgn0002921 | Atpalpha | 477    | ATP1A2    | 6  |
| 48971 | FBgn0002921 | Atpalpha | 479    | ATP12A    | 4  |
| 48971 | FBgn0002921 | Atpalpha | 495    | ATP4A     | 4  |
| 48971 | FBgn0002921 | Atpalpha | 480    | ATP1A4    | 4  |
| 48971 | FBgn0002921 | Atpalpha | 488    | ATP2A2    | 1  |
| 48971 | FBgn0002921 | Atpalpha | 488    | ATP2A2    | 1  |
| 48971 | FBgn0002921 | Atpalpha | 488    | ATP2A2    | 1  |

Sheet1

|       |             |           |        |         |    |
|-------|-------------|-----------|--------|---------|----|
| 48971 | FBgn0002921 | Atpalpha  | 487    | ATP2A1  | 1  |
| 48971 | FBgn0002921 | Atpalpha  | 487    | ATP2A1  | 1  |
| 48971 | FBgn0002921 | Atpalpha  | 487    | ATP2A1  | 1  |
| 41205 | FBgn0037756 | CG8507    | 4043   | LRPAP1  | 8  |
| 32518 | FBgn0027329 | Tcp-1zeta | 908    | CCT6A   | 9  |
| 32518 | FBgn0027329 | Tcp-1zeta | 10693  | CCT6B   | 7  |
| 42889 | FBgn0011225 | jar       | 4646   | MYO6    | 6  |
| 42889 | FBgn0011225 | jar       | 4646   | MYO6    | 6  |
| 42889 | FBgn0011225 | jar       | 4646   | MYO6    | 6  |
| 42889 | FBgn0011225 | jar       | 4646   | MYO6    | 6  |
| 42889 | FBgn0011225 | jar       | 4620   | MYH2    | 1  |
| 34445 | FBgn0086347 | Myo31DF   | 4642   | MYO1D   | 10 |
| 34445 | FBgn0086347 | Myo31DF   | 4642   | MYO1D   | 10 |
| 34445 | FBgn0086347 | Myo31DF   | 64005  | MYO1G   | 6  |
| 34445 | FBgn0086347 | Myo31DF   | 4640   | MYO1A   | 2  |
| 34445 | FBgn0086347 | Myo31DF   | 4643   | MYO1E   | 2  |
| 34445 | FBgn0086347 | Myo31DF   | 4641   | MYO1C   | 2  |
| 34445 | FBgn0086347 | Myo31DF   | 4430   | MYO1B   | 2  |
| 34445 | FBgn0086347 | Myo31DF   | 4542   | MYO1F   | 2  |
| 34445 | FBgn0086347 | Myo31DF   | 283446 | MYO1H   | 1  |
| 35539 | FBgn0033062 | Ars2      | 51593  | SRRT    | 10 |
| 40739 | FBgn0003261 | Rm62      | 10521  | DDX17   | 9  |
| 40739 | FBgn0003261 | Rm62      | 1655   | DDX5    | 6  |
| 40739 | FBgn0003261 | Rm62      | 55510  | DDX43   | 1  |
| 42438 | FBgn0014029 | Sep2      | 55752  | SEPT11  | 8  |
| 42438 | FBgn0014029 | Sep2      | 23176  | SEPT8   | 7  |
| 42438 | FBgn0014029 | Sep2      | 23157  | SEPT6   | 6  |
| 42438 | FBgn0014029 | Sep2      | 346288 | SEPT14  | 5  |
| 42438 | FBgn0014029 | Sep2      | 151011 | SEPT10  | 5  |
| 42438 | FBgn0014029 | Sep2      | 124404 | SEPT12  | 1  |
| 42438 | FBgn0014029 | Sep2      | 10801  | SEPT9   | 1  |
| 42438 | FBgn0014029 | Sep2      | 10801  | SEPT9   | 1  |
| 42438 | FBgn0014029 | Sep2      | 10801  | SEPT9   | 1  |
| 42438 | FBgn0014029 | Sep2      | 10801  | SEPT9   | 1  |
| 42438 | FBgn0014029 | Sep2      | 10801  | SEPT9   | 1  |
| 42438 | FBgn0014029 | Sep2      | 10801  | SEPT9   | 1  |
| 42438 | FBgn0014029 | Sep2      | 989    | SEPT7   | 1  |
| 42438 | FBgn0014029 | Sep2      | 4735   | SEPT2   | 1  |
| 42438 | FBgn0014029 | Sep2      | 55964  | SEPT3   | 1  |
| 39587 | FBgn0026409 | Mpcp      | 5250   | SLC25A3 | 9  |
| 40138 | FBgn0036892 | CG8798    | 9361   | LONP1   | 9  |
| 40138 | FBgn0036892 | CG8798    | 83752  | LONP2   | 1  |
| 43183 | FBgn0000064 | Ald       | 226    | ALDOA   | 10 |
| 43183 | FBgn0000064 | Ald       | 230    | ALDOC   | 7  |
| 43183 | FBgn0000064 | Ald       | 229    | ALDOB   | 6  |
| 43183 | FBgn0000064 | Ald       | 229    | ALDOB   | 6  |
| 37467 | FBgn0034646 | Rae1      | 8480   | RAE1    | 10 |
| 33458 | FBgn0031450 | Hrs       | 9146   | HGS     | 10 |
| 33458 | FBgn0031450 | Hrs       | 23163  | GGA3    | 1  |
| 33458 | FBgn0031450 | Hrs       | 10160  | FARP1   | 1  |
| 33458 | FBgn0031450 | Hrs       | 10160  | FARP1   | 1  |
| 33458 | FBgn0031450 | Hrs       | 10160  | FARP1   | 1  |

Sheet1

|       |             |               |           |             |    |
|-------|-------------|---------------|-----------|-------------|----|
| 33458 | FBgn0031450 | Hrs           | 23062     | GGA2        | 1  |
| 33458 | FBgn0031450 | Hrs           | 146691    | TOM1L2      | 1  |
| 33458 | FBgn0031450 | Hrs           | 26088     | GGA1        | 1  |
| 43532 | FBgn0039713 | RpS8          | 6202      | RPS8        | 8  |
| 35246 | FBgn0003231 | ref(2)P       | 8878      | SQSTM1      | 4  |
| 35246 | FBgn0003231 | ref(2)P       | 8878      | SQSTM1      | 4  |
| 44437 | FBgn0024509 | sec13         | 6396      | SEC13       | 10 |
| 42186 | FBgn0020238 | 14-3-3epsilon | 7531      | YWHAE       | 10 |
| 42186 | FBgn0020238 | 14-3-3epsilon | 7534      | YWHAZ       | 3  |
| 42186 | FBgn0020238 | 14-3-3epsilon | 7529      | YWHAB       | 3  |
| 42186 | FBgn0020238 | 14-3-3epsilon | 10971     | YWHAQ       | 1  |
| 42186 | FBgn0020238 | 14-3-3epsilon | 7533      | YWHAH       | 1  |
| 42186 | FBgn0020238 | 14-3-3epsilon | 2810      | SFN         | 1  |
| 42186 | FBgn0020238 | 14-3-3epsilon | 7532      | YWHAG       | 1  |
| 40972 | FBgn0010173 | RpA-70        | 6117      | RPA1        | 10 |
| 32905 | FBgn0030993 | Mec2          | 161003    | STOML3      | 3  |
| 32905 | FBgn0030993 | Mec2          | 2040      | STOM        | 3  |
| 32905 | FBgn0030993 | Mec2          | 30968     | STOML2      | 2  |
| 32905 | FBgn0030993 | Mec2          | 7827      | NPHS2       | 2  |
| 32905 | FBgn0030993 | Mec2          | 9399      | STOML1      | 1  |
| 37090 | FBgn0003022 | Ote           |           |             |    |
| 31620 | FBgn0029903 | pod1          | 79585     | CORO7       | 10 |
| 31620 | FBgn0029903 | pod1          | 100529144 | CORO7-PAM16 | 1  |
| 31620 | FBgn0029903 | pod1          | 51025     | PAM16       | 1  |
| 35801 | FBgn0013726 | pnut          | 989       | SEPT7       | 10 |
| 35801 | FBgn0013726 | pnut          | 4735      | SEPT2       | 2  |
| 35801 | FBgn0013726 | pnut          | 124404    | SEPT12      | 1  |
| 35801 | FBgn0013726 | pnut          | 1731      | SEPT1       | 1  |
| 35801 | FBgn0013726 | pnut          | 10801     | SEPT9       | 1  |
| 35801 | FBgn0013726 | pnut          | 10801     | SEPT9       | 1  |
| 35801 | FBgn0013726 | pnut          | 10801     | SEPT9       | 1  |
| 35801 | FBgn0013726 | pnut          | 10801     | SEPT9       | 1  |
| 35801 | FBgn0013726 | pnut          | 10801     | SEPT9       | 1  |
| 35801 | FBgn0013726 | pnut          | 10801     | SEPT9       | 1  |
| 35801 | FBgn0013726 | pnut          | 285961    | SEPT7L      | 1  |
| 35801 | FBgn0013726 | pnut          | 23176     | SEPT8       | 1  |
| 35801 | FBgn0013726 | pnut          | 5414      | SEPT4       | 1  |
| 35801 | FBgn0013726 | pnut          | 5413      | SEPT5       | 1  |
| 35801 | FBgn0013726 | pnut          | 55964     | SEPT3       | 1  |
| 43651 | FBgn0011739 | wtS           | 9113      | LATS1       | 7  |
| 43651 | FBgn0011739 | wtS           | 26524     | LATS2       | 7  |
| 43651 | FBgn0011739 | wtS           | 23012     | STK38L      | 1  |
| 43651 | FBgn0011739 | wtS           | 11329     | STK38       | 1  |
| 33245 | FBgn0000497 | ds            | 8642      | DCHS1       | 7  |
| 33245 | FBgn0000497 | ds            | 64072     | CDH23       | 3  |
| 33245 | FBgn0000497 | ds            | 64072     | CDH23       | 3  |
| 33245 | FBgn0000497 | ds            | 64072     | CDH23       | 3  |
| 33245 | FBgn0000497 | ds            | 64072     | CDH23       | 3  |
| 33245 | FBgn0000497 | ds            | 79633     | FAT4        | 2  |
| 33245 | FBgn0000497 | ds            | 79633     | FAT4        | 2  |
| 33245 | FBgn0000497 | ds            | 120114    | FAT3        | 2  |
| 33245 | FBgn0000497 | ds            | 54798     | DCHS2       | 2  |

Sheet1

|       |             |         |        |        |    |
|-------|-------------|---------|--------|--------|----|
| 33245 | FBgn0000497 | ds      | 54798  | DCHS2  | 2  |
| 33245 | FBgn0000497 | ds      | 54798  | DCHS2  | 2  |
| 33245 | FBgn0000497 | ds      | 2195   | FAT1   | 2  |
| 33245 | FBgn0000497 | ds      | 2196   | FAT2   | 2  |
| 35378 | FBgn0023388 | Dap160  | 6453   | ITSN1  | 9  |
| 35378 | FBgn0023388 | Dap160  | 50618  | ITSN2  | 8  |
| 35378 | FBgn0023388 | Dap160  | 79729  | SH3D21 | 1  |
| 35378 | FBgn0023388 | Dap160  | 9322   | TRIP10 | 1  |
| 35378 | FBgn0023388 | Dap160  | 80303  | EFHD1  | 1  |
| 35378 | FBgn0023388 | Dap160  | 79180  | EFHD2  | 1  |
| 35378 | FBgn0023388 | Dap160  | 26751  | SH3YL1 | 1  |
| 35378 | FBgn0023388 | Dap160  | 54874  | FNBP1L | 1  |
| 36546 | FBgn0013770 | Cp1     | 1515   | CTSL2  | 8  |
| 36546 | FBgn0013770 | Cp1     | 1514   | CTSL1  | 5  |
| 36546 | FBgn0013770 | Cp1     | 1520   | CTSS   | 4  |
| 36546 | FBgn0013770 | Cp1     | 1513   | CTSK   | 4  |
| 36546 | FBgn0013770 | Cp1     | 1513   | CTSK   | 4  |
| 36546 | FBgn0013770 | Cp1     | 8722   | CTSF   | 1  |
| 35158 | FBgn0032731 | CG10641 | 79180  | EFHD2  | 9  |
| 35158 | FBgn0032731 | CG10641 | 80303  | EFHD1  | 8  |
| 35158 | FBgn0032731 | CG10641 | 83543  | AIF1L  | 1  |
| 35158 | FBgn0032731 | CG10641 | 199    | AIF1   | 1  |
| 35158 | FBgn0032731 | CG10641 | 199    | AIF1   | 1  |
| 39613 | FBgn0036451 | CG9425  | 9931   | HELZ   | 7  |
| 39613 | FBgn0036451 | CG9425  | 85441  | HELZ2  | 1  |
| 39826 | FBgn0014163 | fax     | 84553  | FAXC   | 6  |
| 38096 | FBgn0035165 | CG13887 | 10134  | BCAP31 | 10 |
| 38096 | FBgn0035165 | CG13887 | 55973  | BCAP29 | 6  |
| 32257 | FBgn0261524 | lic     | 5608   | MAP2K6 | 9  |
| 32257 | FBgn0261524 | lic     | 5606   | MAP2K3 | 7  |
| 32257 | FBgn0261524 | lic     | 5609   | MAP2K7 | 1  |
| 32257 | FBgn0261524 | lic     | 5605   | MAP2K2 | 1  |
| 32257 | FBgn0261524 | lic     | 6416   | MAP2K4 | 1  |
| 32257 | FBgn0261524 | lic     | 5604   | MAP2K1 | 1  |
| 39864 | FBgn0063485 | Lasp    | 3927   | LASP1  | 8  |
| 39864 | FBgn0063485 | Lasp    | 10529  | NEBL   | 3  |
| 39864 | FBgn0063485 | Lasp    | 4703   | NEB    | 2  |
| 39864 | FBgn0063485 | Lasp    | 4892   | NRAP   | 2  |
| 39864 | FBgn0063485 | Lasp    | 28988  | DBNL   | 1  |
| 36497 | FBgn0004638 | drk     | 2885   | GRB2   | 8  |
| 36497 | FBgn0004638 | drk     | 10750  | GRAP   | 3  |
| 36497 | FBgn0004638 | drk     | 400581 | GRAPL  | 2  |
| 36497 | FBgn0004638 | drk     | 9402   | GRAP2  | 2  |
| 36497 | FBgn0004638 | drk     | 6456   | SH3GL2 | 1  |
| 36497 | FBgn0004638 | drk     | 6456   | SH3GL2 | 1  |
| 36497 | FBgn0004638 | drk     | 6456   | SH3GL2 | 1  |
| 36497 | FBgn0004638 | drk     | 6456   | SH3GL2 | 1  |
| 36497 | FBgn0004638 | drk     | 6457   | SH3GL3 | 1  |
| 36497 | FBgn0004638 | drk     | 10254  | STAM2  | 1  |
| 36497 | FBgn0004638 | drk     | 8027   | STAM   | 1  |
| 31597 | FBgn0029882 | CG3226  | 27101  | CACYBP | 10 |

Sheet1

|       |             |             |        |           |    |
|-------|-------------|-------------|--------|-----------|----|
| 32979 | FBgn0086384 | Mer         | 4771   | NF2       | 8  |
| 32979 | FBgn0086384 | Mer         | 4771   | NF2       | 8  |
| 32979 | FBgn0086384 | Mer         | 4771   | NF2       | 8  |
| 32979 | FBgn0086384 | Mer         | 4771   | NF2       | 8  |
| 32979 | FBgn0086384 | Mer         | 4771   | NF2       | 8  |
| 32979 | FBgn0086384 | Mer         | 4771   | NF2       | 8  |
| 32979 | FBgn0086384 | Mer         | 4771   | NF2       | 8  |
| 32979 | FBgn0086384 | Mer         | 5962   | RDX       | 2  |
| 32979 | FBgn0086384 | Mer         | 7430   | EZR       | 1  |
| 32979 | FBgn0086384 | Mer         | 4478   | MSN       | 1  |
| 34242 | FBgn0041092 | tai         | 23054  | NCOA6     | 1  |
| 34242 | FBgn0041092 | tai         | 607    | BCL9      | 1  |
| 34242 | FBgn0041092 | tai         | 283149 | BCL9L     | 1  |
| 43041 | FBgn0039302 | Nup358      | 5903   | RANBP2    | 7  |
| 43041 | FBgn0039302 | Nup358      | 653489 | RGPD3     | 6  |
| 43041 | FBgn0039302 | Nup358      | 285190 | RGPD4     | 5  |
| 43041 | FBgn0039302 | Nup358      | 729540 | RGPD6     | 5  |
| 43041 | FBgn0039302 | Nup358      | 727851 | RGPD8     | 5  |
| 43041 | FBgn0039302 | Nup358      | 400966 | RGPD1     | 5  |
| 43041 | FBgn0039302 | Nup358      | 84220  | RGPD5     | 4  |
| 43041 | FBgn0039302 | Nup358      | 729857 | RGPD2     | 3  |
| 43041 | FBgn0039302 | Nup358      | 5902   | RANBP1    | 2  |
| 43041 | FBgn0039302 | Nup358      | 9648   | GCC2      | 1  |
| 43041 | FBgn0039302 | Nup358      | 644591 | PPIAL4G   | 1  |
| 43041 | FBgn0039302 | Nup358      | 653598 | PPIAL4C   | 1  |
| 43041 | FBgn0039302 | Nup358      | 645142 | PPIAL4D   | 1  |
| 43041 | FBgn0039302 | Nup358      | 164022 | PPIAL4A   | 1  |
| 43041 | FBgn0039302 | Nup358      | 5478   | PPIA      | 1  |
| 43041 | FBgn0039302 | Nup358      | 653505 | PPIAL4B   | 1  |
| 43041 | FBgn0039302 | Nup358      | 389842 | LOC389842 | 1  |
| 42504 | FBgn0023423 | slmb        | 8945   | BTRC      | 10 |
| 42504 | FBgn0023423 | slmb        | 23291  | FBXW11    | 7  |
| 42504 | FBgn0023423 | slmb        | 349136 | WDR86     | 1  |
| 37247 | FBgn0261456 | hpo         | 6788   | STK3      | 9  |
| 37247 | FBgn0261456 | hpo         | 6789   | STK4      | 7  |
| 37247 | FBgn0261456 | hpo         | 51765  | MST4      | 1  |
| 37247 | FBgn0261456 | hpo         | 10494  | STK25     | 1  |
| 37247 | FBgn0261456 | hpo         | 8428   | STK24     | 1  |
| 37247 | FBgn0261456 | hpo         | 8428   | STK24     | 1  |
| 43620 | FBgn0039776 | PH4alphaEFB | 5033   | P4HA1     | 9  |
| 43620 | FBgn0039776 | PH4alphaEFB | 8974   | P4HA2     | 7  |
| 43620 | FBgn0039776 | PH4alphaEFB | 283208 | P4HA3     | 1  |
| 32588 | FBgn0030734 | CG9911      | 23071  | ERP44     | 10 |
| 31349 | FBgn0029687 | Vap-33-1    | 9217   | VAPB      | 8  |
| 31349 | FBgn0029687 | Vap-33-1    | 9217   | VAPB      | 8  |
| 31349 | FBgn0029687 | Vap-33-1    | 9218   | VAPA      | 7  |
| 33218 | FBgn0004583 | ex          | 122786 | FRMD6     | 3  |
| 33218 | FBgn0004583 | ex          | 122786 | FRMD6     | 3  |
| 33218 | FBgn0004583 | ex          | 122786 | FRMD6     | 3  |
| 33218 | FBgn0004583 | ex          | 122786 | FRMD6     | 3  |
| 33218 | FBgn0004583 | ex          | 79981  | FRMD1     | 3  |

Sheet1

|       |             |            |        |         |    |
|-------|-------------|------------|--------|---------|----|
| 33218 | FBgn0004583 | ex         | 2036   | EPB41L1 | 1  |
| 38418 | FBgn0004167 | kst        | 51332  | SPTBN5  | 9  |
| 38418 | FBgn0004167 | kst        | 6708   | SPTA1   | 2  |
| 38418 | FBgn0004167 | kst        | 6708   | SPTA1   | 2  |
| 38418 | FBgn0004167 | kst        | 6708   | SPTA1   | 2  |
| 38418 | FBgn0004167 | kst        | 6708   | SPTA1   | 2  |
| 38418 | FBgn0004167 | kst        | 6708   | SPTA1   | 2  |
| 38418 | FBgn0004167 | kst        | 6709   | SPTAN1  | 2  |
| 38418 | FBgn0004167 | kst        | 6712   | SPTBN2  | 1  |
| 38418 | FBgn0004167 | kst        | 6712   | SPTBN2  | 1  |
| 38418 | FBgn0004167 | kst        | 6710   | SPTB    | 1  |
| 38418 | FBgn0004167 | kst        | 6710   | SPTB    | 1  |
| 38418 | FBgn0004167 | kst        | 6710   | SPTB    | 1  |
| 38418 | FBgn0004167 | kst        | 6710   | SPTB    | 1  |
| 38418 | FBgn0004167 | kst        | 6711   | SPTBN1  | 1  |
| 38418 | FBgn0004167 | kst        | 6711   | SPTBN1  | 1  |
| 38418 | FBgn0004167 | kst        | 57731  | SPTBN4  | 1  |
| 37851 | FBgn0034970 | yki        | 10413  | YAP1    | 4  |
| 37851 | FBgn0034970 | yki        | 10413  | YAP1    | 4  |
| 37851 | FBgn0034970 | yki        | 25937  | WWTR1   | 2  |
| 42029 | FBgn0015019 | Cctgamma   | 7203   | CCT3    | 10 |
| 31016 | FBgn0025637 | skpA       | 6500   | SKP1    | 9  |
| 38457 | FBgn0035471 | Sc2        | 9524   | TECR    | 10 |
| 38457 | FBgn0035471 | Sc2        | 253017 | TECRL   | 5  |
| 37089 | FBgn0000658 | fj         | 24147  | FJX1    | 6  |
| 34276 | FBgn0028479 | CG4389     | 3030   | HADHA   | 10 |
| 34276 | FBgn0028479 | CG4389     | 3030   | HADHA   | 10 |
| 34276 | FBgn0028479 | CG4389     | 3030   | HADHA   | 10 |
| 34276 | FBgn0028479 | CG4389     | 3030   | HADHA   | 10 |
| 34276 | FBgn0028479 | CG4389     | 1962   | EHHADH  | 1  |
| 34276 | FBgn0028479 | CG4389     | 1962   | EHHADH  | 1  |
| 32537 | FBgn0000319 | Chc        | 1213   | CLTC    | 9  |
| 32537 | FBgn0000319 | Chc        | 8218   | CLTCL1  | 4  |
| 43654 | FBgn0027598 | cindr      | 30011  | SH3KBP1 | 5  |
| 43654 | FBgn0027598 | cindr      | 23607  | CD2AP   | 4  |
| 43654 | FBgn0027598 | cindr      | 23607  | CD2AP   | 4  |
| 43654 | FBgn0027598 | cindr      | 79729  | SH3D21  | 2  |
| 38937 | FBgn0035872 | CG7185     | 11052  | CPSF6   | 10 |
| 38937 | FBgn0035872 | CG7185     | 79869  | CPSF7   | 6  |
| 38231 | FBgn0250789 | alpha-Spec | 6709   | SPTAN1  | 10 |
| 38231 | FBgn0250789 | alpha-Spec | 6708   | SPTA1   | 5  |
| 38231 | FBgn0250789 | alpha-Spec | 6708   | SPTA1   | 5  |
| 38231 | FBgn0250789 | alpha-Spec | 6708   | SPTA1   | 5  |
| 38231 | FBgn0250789 | alpha-Spec | 6708   | SPTA1   | 5  |
| 38231 | FBgn0250789 | alpha-Spec | 6708   | SPTA1   | 5  |
| 38231 | FBgn0250789 | alpha-Spec | 51332  | SPTBN5  | 2  |
| 38231 | FBgn0250789 | alpha-Spec | 6712   | SPTBN2  | 1  |
| 38231 | FBgn0250789 | alpha-Spec | 6712   | SPTBN2  | 1  |
| 38231 | FBgn0250789 | alpha-Spec | 6710   | SPTB    | 1  |
| 38231 | FBgn0250789 | alpha-Spec | 6710   | SPTB    | 1  |
| 38231 | FBgn0250789 | alpha-Spec | 6710   | SPTB    | 1  |
| 38231 | FBgn0250789 | alpha-Spec | 6711   | SPTBN1  | 1  |



Sheet1

|         |             |            |        |         |    |
|---------|-------------|------------|--------|---------|----|
| 38231   | FBgn0250789 | alpha-Spec | 6711   | SPTBN1  | 1  |
| 38231   | FBgn0250789 | alpha-Spec | 57731  | SPTBN4  | 1  |
| 42634   | FBgn0038965 | mats       | 92597  | MOB1B   | 9  |
| 42634   | FBgn0038965 | mats       | 55233  | MOB1A   | 6  |
| 42634   | FBgn0038965 | mats       | 79817  | MOB3B   | 2  |
| 42634   | FBgn0038965 | mats       | 79817  | MOB3B   | 2  |
| 42634   | FBgn0038965 | mats       | 126308 | MOB3A   | 2  |
| 42634   | FBgn0038965 | mats       | 148932 | MOB3C   | 1  |
| 41013   | FBgn0051453 | pch2       | 9319   | TRIP13  | 10 |
| 41367   | FBgn0037894 | Ranbp9     | 55705  | IPO9    | 10 |
| 40933   | FBgn0037530 | CG2943     | 23065  | EMC1    | 9  |
| 37205   | FBgn0010434 | cora       | 2035   | EPB41   | 7  |
| 37205   | FBgn0010434 | cora       | 23136  | EPB41L3 | 6  |
| 37205   | FBgn0010434 | cora       | 2037   | EPB41L2 | 6  |
| 37205   | FBgn0010434 | cora       | 2037   | EPB41L2 | 6  |
| 37205   | FBgn0010434 | cora       | 2036   | EPB41L1 | 4  |
| 39610   | FBgn0036448 | mop        | 25930  | PTPN23  | 8  |
| 39610   | FBgn0036448 | mop        | 10015  | PDCD6IP | 1  |
| 33351   | FBgn0000579 | Eno        | 2023   | ENO1    | 9  |
| 33351   | FBgn0000579 | Eno        | 2026   | ENO2    | 8  |
| 33351   | FBgn0000579 | Eno        | 2027   | ENO3    | 7  |
| 33351   | FBgn0000579 | Eno        | 387712 | ENO4    | 2  |
| 33351   | FBgn0000579 | Eno        | 128178 | EDARADD | 2  |
| 33351   | FBgn0000579 | Eno        | 128178 | EDARADD | 2  |
| 33351   | FBgn0000579 | Eno        | 128178 | EDARADD | 2  |
| 33351   | FBgn0000579 | Eno        | 128178 | EDARADD | 2  |
| 43016   | FBgn0046214 | vig2       | 26135  | SERBP1  | 8  |
| 43016   | FBgn0046214 | vig2       | 22927  | HABP4   | 5  |
| 252554  | FBgn0053193 | sav        | 60485  | SAV1    | 8  |
| 252554  | FBgn0053193 | sav        | 11059  | WWP1    | 1  |
| 40637   | FBgn0037312 | CG11999    | 6388   | SDF2    | 10 |
| 40637   | FBgn0037312 | CG11999    | 23753  | SDF2L1  | 8  |
| 38750   | FBgn0035715 | CG10103    | 9798   | IST1    | 10 |
| 31964   | FBgn0028331 | I(1)G0289  | 84898  | PLXDC2  | 7  |
| 31964   | FBgn0028331 | I(1)G0289  | 57125  | PLXDC1  | 7  |
| 3885565 | FBgn0039924 | CG17471    | 8396   | PIP4K2B | 8  |
| 3885565 | FBgn0039924 | CG17471    | 5305   | PIP4K2A | 8  |
| 3885565 | FBgn0039924 | CG17471    | 79837  | PIP4K2C | 5  |
| 3885565 | FBgn0039924 | CG17471    | 138429 | PIP5KL1 | 1  |
| 3885565 | FBgn0039924 | CG17471    | 8394   | PIP5K1A | 1  |
| 3885565 | FBgn0039924 | CG17471    | 23396  | PIP5K1C | 1  |
| 38420   | FBgn0027616 | YT521-B    | 91746  | YTHDC1  | 8  |
| 42841   | FBgn0015795 | Rab7       | 7879   | RAB7A   | 8  |
| 42841   | FBgn0015795 | Rab7       | 9367   | RAB9A   | 1  |
| 45928   | FBgn0003392 | shi        | 1759   | DNM1    | 9  |
| 45928   | FBgn0003392 | shi        | 1785   | DNM2    | 7  |
| 45928   | FBgn0003392 | shi        | 1785   | DNM2    | 7  |
| 45928   | FBgn0003392 | shi        | 1785   | DNM2    | 7  |
| 45928   | FBgn0003392 | shi        | 1785   | DNM2    | 7  |
| 45928   | FBgn0003392 | shi        | 1785   | DNM2    | 7  |
| 45928   | FBgn0003392 | shi        | 26052  | DNM3    | 5  |

Sheet1

|       |             |           |        |         |    |
|-------|-------------|-----------|--------|---------|----|
| 45928 | FBgn0003392 | shi       | 26052  | DNM3    | 5  |
| 45928 | FBgn0003392 | shi       | 26052  | DNM3    | 5  |
| 45928 | FBgn0003392 | shi       | 196968 | DNM1P46 | 1  |
| 45928 | FBgn0003392 | shi       | 729809 | DNM1P34 | 1  |
| 45928 | FBgn0003392 | shi       | 10059  | DNM1L   | 1  |
| 44072 | FBgn0020255 | ran       | 5901   | RAN     | 9  |
| 44072 | FBgn0020255 | ran       | 221547 | RANP1   | 1  |
| 44072 | FBgn0020255 | ran       | 51715  | RAB23   | 1  |
| 35933 | FBgn0086656 | shrb      | 128866 | CHMP4B  | 10 |
| 35933 | FBgn0086656 | shrb      | 29082  | CHMP4A  | 7  |
| 35933 | FBgn0086656 | shrb      | 92421  | CHMP4C  | 5  |
| 35933 | FBgn0086656 | shrb      | 91782  | CHMP7   | 1  |
| 41173 | FBgn0037728 | CG16817   | 10728  | PTGES3  | 9  |
| 41173 | FBgn0037728 | CG16817   | 51495  | PTPLAD1 | 1  |
| 38399 | FBgn0035424 | CG11505   | 113251 | LARP4   | 6  |
| 38399 | FBgn0035424 | CG11505   | 23185  | LARP4B  | 4  |
| 36329 | FBgn0000253 | Cam       | 808    | CALM3   | 8  |
| 36329 | FBgn0000253 | Cam       | 801    | CALM1   | 6  |
| 36329 | FBgn0000253 | Cam       | 810    | CALML3  | 5  |
| 36329 | FBgn0000253 | Cam       | 285051 | C2orf61 | 3  |
| 36329 | FBgn0000253 | Cam       | 805    | CALM2   | 2  |
| 38489 | FBgn0028484 | Ack       | 10188  | TNK2    | 7  |
| 38489 | FBgn0028484 | Ack       | 8711   | TNK1    | 6  |
| 42491 | FBgn0025865 | Cortactin | 2017   | CTTN    | 8  |
| 42491 | FBgn0025865 | Cortactin | 3059   | HCLS1   | 8  |
| 42491 | FBgn0025865 | Cortactin | 8027   | STAM    | 1  |
| 36280 | FBgn0011704 | RnrS      | 6241   | RRM2    | 8  |
| 36280 | FBgn0011704 | RnrS      | 50484  | RRM2B   | 7  |
| 36280 | FBgn0011704 | RnrS      | 50484  | RRM2B   | 7  |
| 36280 | FBgn0011704 | RnrS      | 50484  | RRM2B   | 7  |
| 34882 | FBgn0000317 | ck        | 4647   | MYO7A   | 9  |
| 34882 | FBgn0000317 | ck        | 4647   | MYO7A   | 9  |
| 34882 | FBgn0000317 | ck        | 4647   | MYO7A   | 9  |
| 34882 | FBgn0000317 | ck        | 4648   | MYO7B   | 3  |
| 34882 | FBgn0000317 | ck        | 51168  | MYO15A  | 1  |
| 34882 | FBgn0000317 | ck        | 4651   | MYO10   | 1  |
| 32987 | FBgn0010380 | Bap       | 162    | AP1B1   | 9  |
| 32987 | FBgn0010380 | Bap       | 163    | AP2B1   | 7  |
| 32536 | FBgn0003345 | sd        | 7003   | TEAD1   | 8  |
| 32536 | FBgn0003345 | sd        | 7003   | TEAD1   | 8  |
| 32536 | FBgn0003345 | sd        | 8463   | TEAD2   | 8  |
| 32536 | FBgn0003345 | sd        | 7005   | TEAD3   | 8  |
| 32536 | FBgn0003345 | sd        | 7004   | TEAD4   | 7  |
| 42734 | FBgn0039055 | Rassf     | 9770   | RASSF2  | 6  |
| 42734 | FBgn0039055 | Rassf     | 83937  | RASSF4  | 6  |
| 42734 | FBgn0039055 | Rassf     | 166824 | RASSF6  | 5  |
| 42734 | FBgn0039055 | Rassf     | 1396   | CRIP1   | 2  |
| 42734 | FBgn0039055 | Rassf     | 83593  | RASSF5  | 1  |
| 42734 | FBgn0039055 | Rassf     | 11186  | RASSF1  | 1  |
| 42734 | FBgn0039055 | Rassf     | 11186  | RASSF1  | 1  |
| 42734 | FBgn0039055 | Rassf     | 11186  | RASSF1  | 1  |

Sheet1

|       |             |          |           |              |    |
|-------|-------------|----------|-----------|--------------|----|
| 42734 | FBgn0039055 | Rassf    | 11186     | RASSF1       | 1  |
| 42734 | FBgn0039055 | Rassf    | 11186     | RASSF1       | 1  |
| 42734 | FBgn0039055 | Rassf    | 11186     | RASSF1       | 1  |
| 42734 | FBgn0039055 | Rassf    | 11186     | RASSF1       | 1  |
| 42734 | FBgn0039055 | Rassf    | 11186     | RASSF1       | 1  |
| 42734 | FBgn0039055 | Rassf    | 11186     | RASSF1       | 1  |
| 42734 | FBgn0039055 | Rassf    | 11186     | RASSF1       | 1  |
| 42734 | FBgn0039055 | Rassf    | 11186     | RASSF1       | 1  |
| 42734 | FBgn0039055 | Rassf    | 11186     | RASSF1       | 1  |
| 42734 | FBgn0039055 | Rassf    | 283349    | RASSF3       | 1  |
| 38612 | FBgn0035600 | CG4769   | 1537      | CYC1         | 10 |
| 31904 | FBgn0027084 | Aats-lys | 3735      | KARS         | 10 |
| 37528 | FBgn0028734 | Fmr1     | 9513      | FXR2         | 8  |
| 37528 | FBgn0028734 | Fmr1     | 8087      | FXR1         | 8  |
| 37528 | FBgn0028734 | Fmr1     | 2332      | FMR1         | 6  |
| 37528 | FBgn0028734 | Fmr1     | 2332      | FMR1         | 6  |
| 37528 | FBgn0028734 | Fmr1     | 2332      | FMR1         | 6  |
| 37528 | FBgn0028734 | Fmr1     | 2332      | FMR1         | 6  |
| 33418 | FBgn0014010 | Rab5     | 5869      | RAB5B        | 9  |
| 33418 | FBgn0014010 | Rab5     | 5869      | RAB5B        | 9  |
| 33418 | FBgn0014010 | Rab5     | 5878      | RAB5C        | 9  |
| 33418 | FBgn0014010 | Rab5     | 5868      | RAB5A        | 8  |
| 33418 | FBgn0014010 | Rab5     | 6236      | RRAD         | 1  |
| 33418 | FBgn0014010 | Rab5     | 57403     | RAB22A       | 1  |
| 41320 | FBgn0037856 | CG4674   | 10628     | TXNIP        | 2  |
| 41320 | FBgn0037856 | CG4674   | 92714     | ARRDC1       | 1  |
| 41320 | FBgn0037856 | CG4674   | 27106     | ARRDC2       | 1  |
| 41320 | FBgn0037856 | CG4674   | 91947     | ARRDC4       | 1  |
| 41320 | FBgn0037856 | CG4674   | 57561     | ARRDC3       | 1  |
| 40506 | FBgn0010348 | Arf79F   | 375       | ARF1         | 9  |
| 40506 | FBgn0010348 | Arf79F   | 377       | ARF3         | 4  |
| 40506 | FBgn0010348 | Arf79F   | 381       | ARF5         | 2  |
| 40506 | FBgn0010348 | Arf79F   | 378       | ARF4         | 2  |
| 40506 | FBgn0010348 | Arf79F   | 100996709 | LOC100996709 | 1  |
| 40506 | FBgn0010348 | Arf79F   | 100506084 | ARL17B       | 1  |
| 39521 | FBgn0036373 | CG10741  |           |              |    |

Sheet1

| <b>Disease/Trait</b>                                                   | <b>Source</b> |
|------------------------------------------------------------------------|---------------|
| Oculopharyngeal muscular dystrophy, 164300 (3)                         | OMIM          |
| Congenital disorder of glycosylation, type I <sub>r</sub> , 614507 (3) | OMIM          |
| Ventricular conduction                                                 | GWAS          |
| Brody myopathy, 601003 (3)                                             | OMIM          |
| Weight                                                                 | GWAS          |
| Body mass index                                                        | GWAS          |
| Acrokeratosis verruciformis, 101900 (3)                                | OMIM          |
| Darier disease, 124200 (3)                                             | OMIM          |
| Protein quantitative trait loci                                        | GWAS          |
| Attention deficit hyperactivity disorder                               | GWAS          |
| Hailey-Hailey disease, 169600 (3)                                      | OMIM          |
| Multiple sclerosis                                                     | GWAS          |
| IgE grass sensitization                                                | GWAS          |
| HDL cholesterol                                                        | GWAS          |
| Deafness, autosomal dominant 48, 607841 (3)                            | OMIM          |
| Hypertension risk in short sleep duration                              | GWAS          |
| Pancreatic cancer                                                      | GWAS          |
| Glomerulosclerosis, focal segmental, 6, 614131 (3)                     | OMIM          |
| Liver enzyme levels (gamma-glutamyl transferase)                       | GWAS          |
| Height                                                                 | GWAS          |
| Trifunctional protein deficiency, 609015 (3)                           | OMIM          |
| Type 2 diabetes                                                        | GWAS          |
| Endometrial cancer                                                     | GWAS          |
| Acyl-CoA dehydrogenase, medium chain, deficiency of, 201450 (3)        | OMIM          |
| Metabolic traits                                                       | GWAS          |
| Metabolite levels                                                      | GWAS          |
| Acyl-CoA dehydrogenase, short-chain, deficiency of, 201470 (3)         | OMIM          |
| Metabolic traits                                                       | GWAS          |
| Metabolite levels                                                      | GWAS          |

Sheet1

|                                                                                               |      |
|-----------------------------------------------------------------------------------------------|------|
| 2-methylbutyrylglucosuria, 610006 (3)                                                         | OMIM |
| Isobutyryl-CoA dehydrogenase deficiency, 611283 (3)                                           | OMIM |
| Amyotrophic lateral sclerosis 14, with or without frontotemporal dementia                     | OMIM |
| Inclusion body myopathy with early-onset Paget disease and frontotemporal dementia            | OMIM |
| Height                                                                                        | GWAS |
| Amyotrophic lateral sclerosis 6, autosomal recessive, with or without frontotemporal dementia | OMIM |
| Tremor, hereditary essential, 4, 614782 (3)                                                   | OMIM |
| Ewing sarcoma, 612219 (3)                                                                     | OMIM |
| Neuroepithelioma, 612219 (3)                                                                  | OMIM |
| Chondrosarcoma, extraskeletal myxoid, 612237 (1)                                              | OMIM |
| Chondrosarcoma, extraskeletal myxoid, 612237 (3)                                              | OMIM |
| Mucopolysaccharidosis VII, 253220 (3)                                                         | OMIM |
| Maple syrup urine disease, type Ia, 248600 (3)                                                | OMIM |
| Maple syrup urine disease, type Ib, 248600 (3)                                                | OMIM |
| Maple syrup urine disease, type II, 248600 (3)                                                | OMIM |
| Maple syrup urine disease, type III, 248600 (3)                                               | OMIM |
| Rheumatoid arthritis                                                                          | GWAS |
| Type 2 diabetes                                                                               | GWAS |
| Fasting glucose-related traits (interaction with BMI)                                         | GWAS |
| Proinsulin levels                                                                             | GWAS |
| Response to TNF antagonist treatment                                                          | GWAS |
| Agnesis of the corpus callosum with peripheral neuropathy, 21800                              | OMIM |
| Height                                                                                        | GWAS |
| Chronic kidney disease                                                                        | GWAS |
| Nephronophthisis-like nephropathy 1, 613159 (3)                                               | OMIM |
| Prolidase deficiency, 170100 (3)                                                              | OMIM |
| Adiponectin levels                                                                            | GWAS |
| Type 2 diabetes                                                                               | GWAS |
| Fasting insulin-related traits (interaction with BMI)                                         | GWAS |

Sheet1

|                                                                                       |      |
|---------------------------------------------------------------------------------------|------|
| Attention deficit hyperactivity disorder and conduct disorder                         | GWAS |
| Miller-Dieker lissencephaly syndrome (4)                                              | OMIM |
| Heart rate variability traits                                                         | GWAS |
| Multiple sclerosis                                                                    | GWAS |
| Microcephaly with or without chorioretinopathy, lymphedema, or meckel-clarke syndrome | OMIM |
| Type 2 diabetes                                                                       | GWAS |
| Bipolar disorder and major depressive disorder (combined)                             | GWAS |
| Cognitive performance                                                                 | GWAS |
| {Deafness, autosomal recessive 12, modifier of}, 601386 (3)                           | OMIM |
| Deafness, autosomal recessive 12, 601386 (3)                                          | OMIM |
| Usher syndrome, type 1D, 601067 (3)                                                   | OMIM |
| Usher syndrome, type 1D/F digenic, 601067 (3)                                         | OMIM |
| Obesity                                                                               | GWAS |
| Alzheimer's disease (age of onset)                                                    | GWAS |
| Fibrinogen                                                                            | GWAS |
| Immune response to smallpox (secreted IL-1beta)                                       | GWAS |
| Leukemia, Philadelphia chromosome-positive, resistant to imatinib                     | OMIM |
| ?Arrhythmogenic right ventricular dysplasia 5, 604400 (1)                             | OMIM |
| Dentatorubro-pallidoluysian atrophy, 125370 (3)                                       | OMIM |
| Griscelli syndrome, type 1, 214450 (3)                                                | OMIM |
| Microvillus inclusion disease, 251850 (3)                                             | OMIM |
| Cardiomyopathy, dilated, 1S, 613426 (3)                                               | OMIM |
| Cardiomyopathy, familial hypertrophic, 1, 192600 (3)                                  | OMIM |
| Cardiomyopathy, familial hypertrophic, 192600 (3)                                     | OMIM |
| Cardiomyopathy, hypertrophic, midventricular, digenic, 192600 (3)                     | OMIM |
| Laing distal myopathy, 160500 (3)                                                     | OMIM |
| Left ventricular noncompaction 5, 613426 (3)                                          | OMIM |
| Myopathy, myosin storage, 608358 (3)                                                  | OMIM |
| Scapuloperoneal syndrome, myopathic type, 181430 (3)                                  | OMIM |
| Resting heart rate                                                                    | GWAS |
| Deafness, autosomal dominant 17, 603622 (3)                                           | OMIM |
| Epstein syndrome, 153650 (3)                                                          | OMIM |

Sheet1

|                                                                   |      |
|-------------------------------------------------------------------|------|
| Fechtner syndrome, 153640 (3)                                     | OMIM |
| Macrothrombocytopenia and progressive sensorineural deafness, 6   | OMIM |
| May-Hegglin anomaly, 155100 (3)                                   | OMIM |
| Sebastian syndrome, 605249 (3)                                    | OMIM |
| End-stage renal disease (non-diabetic)                            | GWAS |
| Glomerulosclerosis                                                | GWAS |
| Optic disc size (rim)                                             | GWAS |
| Anticoagulant levels                                              | GWAS |
| Prothrombin time                                                  | GWAS |
| Aortic aneurysm, familial thoracic 4, 132900 (3)                  | OMIM |
| Arthrogyrosis multiplex congenita, distal, type 2B, 601680 (3)    | OMIM |
| Arthrogyrosis, distal, type 2A, 193700 (3)                        | OMIM |
| Arthrogyrosis, distal, type 2B, 601680 (3)                        | OMIM |
| Arthyrgyrosis, distal, type 2B, 601680 (3)                        | OMIM |
| Carney complex variant, 608837 (3)                                | OMIM |
| Trismus-pseudocamptodactyly syndrome, 158300 (3)                  | OMIM |
| Hemostatic factors and hematological phenotypes                   | GWAS |
| Deafness, autosomal dominant 4A, 600652 (3)                       | OMIM |
| Peripheral neuropathy, myopathy, hoarseness, and hearing loss, 61 | OMIM |
| {Sick sinus syndrome 3}, 614090 (3)                               | OMIM |
| Atrial septal defect 3, 614089 (3)                                | OMIM |
| Cardiomyopathy, dilated, 1EE, 613252 (3)                          | OMIM |
| Cardiomyopathy, familial hypertrophic, 1, 192600 (3)              | OMIM |
| Cardiomyopathy, familial hypertrophic, 14, 613251 (3)             | OMIM |
| Cardiomyopathy, familial hypertrophic, 192600 (3)                 | OMIM |
| Cardiomyopathy, hypertrophic, midventricular, digenic, 192600 (3) | OMIM |
| Resting heart rate                                                | GWAS |
| Electrocardiographic traits                                       | GWAS |
| Inclusion body myopathy-3, 605637 (3)                             | OMIM |
| Combined oxidative phosphorylation deficiency 4, 610678 (3)       | OMIM |
| Body mass index                                                   | GWAS |
| Parkinson disease 18, 614251 (3)                                  | OMIM |
| Ulcerative colitis                                                | GWAS |

Sheet1

|                                                                        |              |
|------------------------------------------------------------------------|--------------|
| Height                                                                 | GWAS         |
| Seckel syndrome 6, 614728 (3)<br>Height                                | OMIM<br>GWAS |
| Myotonic dystrophy 1, 160900 (3)                                       | OMIM         |
| Brain imaging in schizophrenia (interaction)<br>Coronary heart disease | GWAS<br>GWAS |
| Visceral fat                                                           | GWAS         |
| Leukodystrophy, hypomyelinating, 4, 612233 (3)                         | OMIM         |
| Spastic paraplegia 13, autosomal dominant, 605280 (3)                  | OMIM         |
| Response to platinum-based chemotherapy in non-small-cell lung c       | GWAS         |
| Neuropathy, paraneoplastic sensory (1)                                 | OMIM         |
| Breast size                                                            | GWAS         |
| Estradiol levels                                                       | GWAS         |
| Mean platelet volume                                                   | GWAS         |
| Leukodystrophy, hypomyelinating, 7, with or without oligodontia anc    | OMIM         |
| Alternating hemiplegia of childhood 2, 614820 (3)                      | OMIM         |
| Dystonia-12, 128235 (3)                                                | OMIM         |
| Alternating hemiplegia of childhood, 104290 (3)                        | OMIM         |
| Migraine, familial basilar, 602481 (3)                                 | OMIM         |
| Migraine, familial hemiplegic, 2, 602481 (3)                           | OMIM         |
| Acrokeratosis verruciformis, 101900 (3)                                | OMIM         |
| Darier disease, 124200 (3)                                             | OMIM         |
| Protein quantitative trait loci                                        | GWAS         |



Sheet1

|                                                                   |      |
|-------------------------------------------------------------------|------|
| Brody myopathy, 601003 (3)                                        | OMIM |
| Weight                                                            | GWAS |
| Body mass index                                                   | GWAS |
| Deafness, autosomal dominant 22, 606346 (3)                       | OMIM |
| Deafness, autosomal dominant 22, with hypertrophic cardiomyopathy | OMIM |
| Deafness, autosomal recessive 37, 607821 (3)                      | OMIM |
| Hypertension                                                      | GWAS |
| Inclusion body myopathy-3, 605637 (3)                             | OMIM |
| Hypertension risk in short sleep duration                         | GWAS |
| Pancreatic cancer                                                 | GWAS |
| Deafness, autosomal dominant 48, 607841 (3)                       | OMIM |
| Glomerulosclerosis, focal segmental, 6, 614131 (3)                | OMIM |
| Liver enzyme levels (gamma-glutamyl transferase)                  | GWAS |
| Height                                                            | GWAS |
| HDL cholesterol                                                   | GWAS |
| Spermatogenic failure 10, 614822 (3)                              | OMIM |
| Amyotrophy, hereditary neuralgic, 162100 (3)                      | OMIM |
| Leukemia, acute myeloid, therapy-related (1)                      | OMIM |
| Ovarian carcinoma (1)                                             | OMIM |
| Airflow obstruction                                               | GWAS |
| Body mass index                                                   | GWAS |
| Height                                                            | GWAS |
| Mitochondrial phosphate carrier deficiency, 610773 (3)            | OMIM |
| Glycogen storage disease XII, 611881 (3)                          | OMIM |
| Fructose intolerance, 229600 (3)                                  | OMIM |
| Liver enzyme levels (alkaline phosphatase)                        | GWAS |
| Eye color traits                                                  | GWAS |
| Total ventricular volume                                          | GWAS |
| Brain structure                                                   | GWAS |
| Non-alcoholic fatty liver disease histology (lobular)             | GWAS |

Sheet1

|                                                               |      |
|---------------------------------------------------------------|------|
| Paget disease of bone, 602080 (2)                             | OMIM |
| Paget disease of bone, 602080 (3)                             | OMIM |
| Miller-Dieker lissencephaly syndrome (4)                      | OMIM |
| Attention deficit hyperactivity disorder and conduct disorder | GWAS |
| Heart rate variability traits                                 | GWAS |
| Multiple sclerosis                                            | GWAS |
| Metabolic syndrome                                            | GWAS |
| ?Stomatocytosis I, 185000 (1)                                 | OMIM |
| Nephrotic syndrome, type 2, 600995 (3)                        | OMIM |
| Height                                                        | GWAS |
| Spermatogenic failure 10, 614822 (3)                          | OMIM |
| Amyotrophy, hereditary neuralgic, 162100 (3)                  | OMIM |
| Leukemia, acute myeloid, therapy-related (1)                  | OMIM |
| Ovarian carcinoma (1)                                         | OMIM |
| Airflow obstruction                                           | GWAS |
| Body mass index                                               | GWAS |
| {Deafness, autosomal recessive 12, modifier of}, 601386 (3)   | OMIM |
| Deafness, autosomal recessive 12, 601386 (3)                  | OMIM |
| Usher syndrome, type 1D, 601067 (3)                           | OMIM |
| Usher syndrome, type 1D/F digenic, 601067 (3)                 | OMIM |
| Bipolar disorder and major depressive disorder (combined)     | GWAS |
| Cognitive performance                                         | GWAS |
| Alzheimer's disease (age of onset)                            | GWAS |

Sheet1

|                                                 |      |
|-------------------------------------------------|------|
| Fibrinogen                                      | GWAS |
| Immune response to smallpox (secreted IL-1beta) | GWAS |
| Obesity                                         | GWAS |

|                |      |
|----------------|------|
| Working memory | GWAS |
|----------------|------|

|                                                  |      |
|--------------------------------------------------|------|
| Liver enzyme levels (gamma-glutamyl transferase) | GWAS |
|--------------------------------------------------|------|

|                             |      |
|-----------------------------|------|
| Pycnodysostosis, 265800 (3) | OMIM |
| Melanoma                    | GWAS |
| Bipolar disorder            | GWAS |

|                                                  |      |
|--------------------------------------------------|------|
| Liver enzyme levels (gamma-glutamyl transferase) | GWAS |
|--------------------------------------------------|------|

|                |      |
|----------------|------|
| Weight         | GWAS |
| Neonatal lupus | GWAS |

|                                                          |      |
|----------------------------------------------------------|------|
| Response to TNF-alpha inhibitors in rheumatoid arthritis | GWAS |
|----------------------------------------------------------|------|

|                                           |      |
|-------------------------------------------|------|
| Cardiofaciocutaneous syndrome, 115150 (3) | OMIM |
|-------------------------------------------|------|

|                                           |      |
|-------------------------------------------|------|
| Cardiofaciocutaneous syndrome, 115150 (3) | OMIM |
|-------------------------------------------|------|

|                                                      |      |
|------------------------------------------------------|------|
| Nemaline myopathy 2, autosomal recessive, 256030 (3) | OMIM |
|------------------------------------------------------|------|

|                       |      |
|-----------------------|------|
| Cognitive performance | GWAS |
| Heart failure         | GWAS |
| Multiple sclerosis    | GWAS |
| Parkinson's disease   | GWAS |
| Height                | GWAS |

Sheet1

|                                                       |      |
|-------------------------------------------------------|------|
| {Meningioma, familial, susceptibility to}, 607174 (3) | OMIM |
| {Meningioma}, 607174 (3)                              | OMIM |
| Meningioma, 607174 (3)                                | OMIM |
| Meningioma, NF2-related, somatic, 607174 (3)          | OMIM |
| Neurofibromatosis, type 2, 101000 (3)                 | OMIM |
| Schwannomatosis, 162091 (3)                           | OMIM |
| Carotid atherosclerosis in HIV infection              | GWAS |
| Deafness, autosomal recessive 24, 611022 (3)          | OMIM |

{Encephalopathy, acute, infection-induced, 3, susceptibility to}, 608 OMIM

Alcohol and nicotine co-dependence GWAS

Height GWAS

T-cell immunodeficiency, recurrent infections, autoimmunity, and c: OMIM

Alzheimer's disease GWAS

Longevity GWAS

Crohn's disease GWAS

Amyotrophic lateral sclerosis 8, 608627 (3) OMIM

Spinal muscular atrophy, late-onset, Finkel type, 182980 (3) OMIM

Total ventricular volume GWAS

Anticoagulant levels GWAS

Brain structure GWAS

Hippocampal atrophy GWAS

Immune response to smallpox (secreted IL-2) GWAS

Sheet1

|                                                          |      |
|----------------------------------------------------------|------|
| Mental retardation, autosomal dominant 11, 614257 (3)    | OMIM |
| Elliptocytosis-2, 130600 (3)                             | OMIM |
| Pyropoikilocytosis, 266140 (3)                           | OMIM |
| Spherocytosis, type 3, 270970 (3)                        | OMIM |
| Glycated hemoglobin levels                               | GWAS |
| Other erythrocyte phenotypes                             | GWAS |
| Epileptic encephalopathy, early infantile, 5, 613477 (3) | OMIM |
| Spinocerebellar ataxia 5, 600224 (3)                     | OMIM |
| Bipolar disorder                                         | GWAS |
| Anemia, neonatal hemolytic, fatal and near-fatal (3)     | OMIM |
| Elliptocytosis-3 (3)                                     | OMIM |
| Spherocytosis, type 2 (3)                                | OMIM |
| Bone mineral density (spine)                             | GWAS |
| Myopia (pathological)                                    | GWAS |
| MRI atrophy measures                                     | GWAS |
| Polycystic ovary syndrome                                | GWAS |
| Subcutaneous adipose tissue                              | GWAS |
| Mental retardation, autosomal recessive 14, 614020 (3)   | OMIM |
| Kawasaki disease                                         | GWAS |
| Fatty liver, acute, of pregnancy, 609016 (3)             | OMIM |
| HELLP syndrome, maternal, of pregnancy, 609016 (3)       | OMIM |
| LCHAD deficiency, 609016 (3)                             | OMIM |
| Trifunctional protein deficiency, 609015 (3)             | OMIM |
| Cognitive performance                                    | GWAS |
| Major depressive disorder                                | GWAS |
| Glomerulosclerosis, focal segmental, 3, 607832 (3)       | OMIM |
| Alzheimer's disease (late onset)                         | GWAS |
| Height                                                   | GWAS |
| Epileptic encephalopathy, early infantile, 5, 613477 (3) | OMIM |
| Elliptocytosis-2, 130600 (3)                             | OMIM |
| Pyropoikilocytosis, 266140 (3)                           | OMIM |
| Spherocytosis, type 3, 270970 (3)                        | OMIM |
| Glycated hemoglobin levels                               | GWAS |
| Other erythrocyte phenotypes                             | GWAS |
| Spinocerebellar ataxia 5, 600224 (3)                     | OMIM |
| Bipolar disorder                                         | GWAS |
| Anemia, neonatal hemolytic, fatal and near-fatal (3)     | OMIM |
| Elliptocytosis-3 (3)                                     | OMIM |
| Spherocytosis, type 2 (3)                                | OMIM |
| Bone mineral density (spine)                             | GWAS |

Sheet1

|                                                                     |      |
|---------------------------------------------------------------------|------|
| Myopia (pathological)                                               | GWAS |
| Amyotrophic lateral sclerosis                                       | GWAS |
| Heart failure                                                       | GWAS |
| Brain structure                                                     | GWAS |
| Elliptocytosis-1, 611804 (3)                                        | OMIM |
| Response to statin therapy (LDL-C)                                  | GWAS |
| Lentiform nucleus volume                                            | GWAS |
| Mental retardation, autosomal dominant 11, 614257 (3)               | OMIM |
| Visceral adipose tissue adjusted for BMI                            | GWAS |
| Enolase deficiency (1)                                              | OMIM |
| Glycogen storage disease XIII, 612932 (3)                           | OMIM |
| Ectodermal dysplasia, anhidrotic, autosomal dominant, 129490 (3)    | OMIM |
| Ectodermal dysplasia, anhidrotic, autosomal recessive, 224900 (3)   | OMIM |
| Ectodermal dysplasia, hypohidrotic, autosomal dominant, 129490 (3)  | OMIM |
| Ectodermal dysplasia, hypohidrotic, autosomal recessive, 224900 (3) | OMIM |
| Crohn's disease                                                     | GWAS |
| Attention deficit hyperactivity disorder and conduct disorder       | GWAS |
| Diabetic retinopathy                                                | GWAS |
| Height                                                              | GWAS |
| Rheumatoid arthritis                                                | GWAS |
| Lethal congenital contractural syndrome 3, 611369 (3)               | OMIM |
| Charcot-Marie-Tooth disease, type 2B, 600882 (3)                    | OMIM |
| Attention deficit hyperactivity disorder                            | GWAS |
| {Centronuclear myopathy, autosomal, modifier of}, 160150 (3)        | OMIM |
| Charcot-Marie-Tooth disease, axonal, type 2M, 606482 (3)            | OMIM |
| Charcot-Marie-Tooth disease, dominant intermediate B, 606482 (3)    | OMIM |
| Myopathy, centronuclear, 160150 (3)                                 | OMIM |
| Coronary heart disease                                              | GWAS |
| Waist-hip ratio                                                     | GWAS |

Sheet1

Height GWAS  
 Mean platelet volume GWAS

Encephalopahty, lethal, due to defective mitochondrial peroxisomal OMIM

Carpenter syndrome, 201000 (3) OMIM  
 Cataract, posterior polar, 3, 605387 (3) OMIM

Response to statin therapy GWAS  
 Dialysis-related mortality GWAS

Mitochondrial DNA depletion syndrome 8A (encephalomyopathic ty OMIM  
 Mitochondrial DNA depletion syndrome 8B (MNGIE type), 612075 ( OMIM  
 Progressive external ophthalmoplegia with mitochondrial DNA dele OMIM  
 Deafness, autosomal dominant 11, 601317 (3) OMIM  
 Deafness, autosomal recessive 2, 600060 (3) OMIM  
 Usher syndrome, type 1B, 276900 (3) OMIM

Deafness, autosomal recessive 3, 600316 (3) OMIM

Carotid atherosclerosis in HIV infection GWAS

Sveinsson choreoretinal atrophy, 108985 (3) OMIM  
 Height GWAS

{Lung cancer, protection against}, 211980 (3) OMIM  
 {Lung cancer, resistance to}, 211980 (3) OMIM  
 {Lung cancer, susceptibility to}, 211980 (3) OMIM

Sheet1

|                                                                        |      |
|------------------------------------------------------------------------|------|
| {Nonsmall cell lung cancer, susceptibility to}, 211980 (3)             | OMIM |
| Adenocarcinoma of lung, response to tyrosine kinase inhibitor in, 2'   | OMIM |
| Adenocarcinoma of lung, somatic, 211980 (3)                            | OMIM |
| Lung cancer, 211980 (1)                                                | OMIM |
| Lung cancer, 211980 (2)                                                | OMIM |
| Lung cancer, 211980 (3)                                                | OMIM |
| Lung cancer, somatic, 211980 (3)                                       | OMIM |
| Nonsmall cell lung cancer, response to tyrosine kinase inhibitor in, : | OMIM |
| Nonsmall cell lung cancer, somatic, 211980 (3)                         | OMIM |

|                                                                    |      |
|--------------------------------------------------------------------|------|
| Charcot-Marie-Tooth disease, recessive intermediate, B, 613641 (3) | OMIM |
| Sex hormone-binding globulin levels                                | GWAS |
| Schizophrenia                                                      | GWAS |
| Fragile X syndrome, 300624 (3)                                     | OMIM |
| Fragile X tremor/ataxia syndrome, 300623 (3)                       | OMIM |
| Premature ovarian failure 1, 311360 (3)                            | OMIM |
| Antineutrophil cytoplasmic antibody-associated vasculitis          | GWAS |
| Type 1 diabetes                                                    | GWAS |
| Polycystic ovary syndrome                                          | GWAS |

|                             |      |
|-----------------------------|------|
| Neuroticism                 | GWAS |
| Subcutaneous adipose tissue | GWAS |



Type of file: table

Label: Table S6

Filename: 2013-Kwon-Science-Hippo\_table\_S6.xls

(A) entire Hippo-PPIN

| ComplexID | Complex Score | P-value               | Size |
|-----------|---------------|-----------------------|------|
| FC5561    | 1             | 2.89341618770299e-267 | 5    |
| FC939     | 1             | 2.54150165579626e-52  | 3    |
| FC442     | 1             | 2.54150165579626e-52  | 3    |
| FC4391    | 1             | 2.54150165579626e-52  | 3    |
| FC1109    | 0.99          | 2.84100786050043e-51  | 3    |
| FC2516    | 0.99          | 2.84100786050043e-51  | 3    |
| FC1611    | 0.99          | 2.84100786050043e-51  | 3    |
| FC139     | 0.99          | 2.84100786050043e-51  | 3    |
| FC338     | 0.985         | 2.58573973768224e-204 | 4    |
| FC3472    | 0.972         | 0                     | 9    |
| FC3501    | 0.96          | 3.42801217872905e-48  | 3    |
| FC2025    | 0.935         | 5.3942230777755e-184  | 4    |
| FC3622    | 0.845         | 1.86852313890594e-152 | 6    |
| FC5993    | 0.7733333333  | 3.09402968839866e-159 | 5    |
| FC2304    | 0.77          | 6.87196739596841e-31  | 3    |
| FC2429    | 0.77          | 6.87196739596841e-31  | 3    |
| FC4759    | 0.735         | 0                     | 10   |
| FC6121    | 0.7275        | 1.20509155311061e-112 | 6    |
| FC5009    | 0.725         | 2.99530998628188e-110 | 4    |
| FC376     | 0.7           | 0                     | 8    |
| FC2716    | 0.6925        | 6.03015808756715e-102 | 6    |
| FC6690    | 0.6733333333  | 2.11569670843213e-120 | 5    |
| FC5980    | 0.6725        | 4.52265862489505e-96  | 6    |
| FC2285    | 0.67          | 2.55265764899546e-23  | 3    |
| FC6008    | 0.668         | 0                     | 9    |
| FC5947    | 0.666666667   | 5.27643257242244e-118 | 5    |
| FC5695    | 0.6633333333  | 8.16166581223231e-117 | 5    |
| FC641     | 0.66          | 1.27557366192804e-22  | 3    |
| FC6308    | 0.6475        | 5.68815984460322e-89  | 6    |
| FC5511    | 0.6475        | 5.68815984460322e-89  | 6    |
| FC5224    | 0.6425        | 0                     | 8    |
| FC5746    | 0.636         | 0                     | 9    |
| FC6347    | 0.626666667   | 3.97537453395164e-104 | 5    |
| FC4285    | 0.62          | 1.78258004350331e-81  | 6    |
| FC3762    | 0.6125        | 1.73157490584624e-79  | 6    |
| FC5349    | 0.6           | 1.1897800574984e-18   | 3    |
| FC2607    | 0.6           | 1.1897800574984e-18   | 3    |
| FC95      | 0.6           | 1.1897800574984e-18   | 3    |
| FC3547    | 0.5925        | 2.62265495274205e-74  | 6    |
| FC5909    | 0.586         | 1.68632734953424e-66  | 7    |
| FC4647    | 0.58          | 0                     | 15   |
| FC422     | 0.58          | 2.89915985179466e-70  | 4    |
| FC3331    | 0.5775        | 1.54874936104184e-70  | 6    |
| FC3863    | 0.576         | 3.31525017782629e-64  | 7    |
| FC2883    | 0.57          | 8.26610312752635e-17  | 3    |
| FC1889    | 0.55          | 1.23654543945063e-15  | 3    |
| FC4645    | 0.5425        | 4.06997144962685e-62  | 6    |
| FC4111    | 0.54          | 0                     | 15   |
| FC1366    | 0.54          | 0                     | 10   |
| FC4811    | 0.5325        | 8.26976030676704e-60  | 6    |

(A) entire Hippo-PPIN

|        |                                   |   |    |
|--------|-----------------------------------|---|----|
| FC4275 | 0.531666667                       | 0 | 10 |
| FC2120 | 0.53 1.51232273095877e-58         |   | 4  |
| FC6017 | 0.525555556                       | 0 | 15 |
| FC5548 | 0.516666667 2.0124225665123e-70   |   | 5  |
| FC4110 | 0.503333333                       | 0 | 15 |
| FC5300 | 0.5                               | 0 | 15 |
| FC940  | 0.5 5.01558269325818e-52          |   | 4  |
| FC2915 | 0.5 1.31305854028783e-52          |   | 6  |
| FC1644 | 0.5 5.01558269325818e-52          |   | 4  |
| FC3005 | 0.5 5.01558269325818e-52          |   | 4  |
| FC5204 | 0.498888889                       | 0 | 15 |
| FC3395 | 0.495 5.62253111084183e-51        |   | 4  |
| FC4002 | 0.4925 5.1864582501542e-51        |   | 6  |
| FC4477 | 0.4925 5.1864582501542e-51        |   | 6  |
| FC5563 | 0.492222222                       | 0 | 15 |
| FC3290 | 0.492222222                       | 0 | 15 |
| FC4013 | 0.49 2.30479915346286e-12         |   | 3  |
| FC5405 | 0.488571429                       | 0 | 11 |
| FC5418 | 0.48 1.21809367219647e-60         |   | 5  |
| FC3389 | 0.4725 7.12890626889255e-47       |   | 6  |
| FC3556 | 0.47                              | 0 | 8  |
| FC3996 | 0.468 5.04336580923982e-292       |   | 9  |
| FC5907 | 0.461111111                       | 0 | 15 |
| FC3130 | 0.46 6.30743902305233e-44         |   | 4  |
| FC68   | 0.456 3.76707656076704e-277       |   | 9  |
| FC4608 | 0.455714286 8.16928652216876e-318 |   | 11 |
| FC6462 | 0.455714286 8.16928652216876e-318 |   | 11 |
| FC4858 | 0.453333333                       | 0 | 15 |
| FC4178 | 0.452 2.80295259499886e-272       |   | 9  |
| FC3246 | 0.45 1.99907244200896e-42         |   | 6  |
| FC6132 | 0.4475 6.04588001528441e-42       |   | 6  |
| FC6412 | 0.443333333                       | 0 | 15 |
| FC5190 | 0.44                              | 0 | 15 |
| FC4484 | 0.44 3.9331966055251e-40          |   | 4  |
| FC5075 | 0.44 3.9331966055251e-40          |   | 4  |
| FC576  | 0.44 3.9331966055251e-40          |   | 4  |
| FC694  | 0.434 5.87605159490777e-36        |   | 7  |
| FC5842 | 0.43                              | 0 | 15 |
| FC6555 | 0.43                              | 0 | 15 |
| FC3942 | 0.43                              | 0 | 15 |
| FC6254 | 0.4275 3.37913931142882e-38       |   | 6  |
| FC4004 | 0.426666667                       | 0 | 12 |
| FC3297 | 0.416666667                       | 0 | 10 |
| FC2526 | 0.416666667 1.86565635259228e-45  |   | 5  |
| FC4344 | 0.41 1.34840166732008e-08         |   | 3  |
| FC1187 | 0.41 1.34840166732008e-08         |   | 3  |
| FC6640 | 0.4                               | 0 | 15 |
| FC4512 | 0.4 2.16315868783119e-30          |   | 7  |
| FC5209 | 0.4 2.16315868783119e-30          |   | 7  |
| FC299  | 0.4 3.57301969087123e-08          |   | 3  |
| FC4730 | 0.398888889                       | 0 | 15 |

(A) entire Hippo-PPIN

|        |             |                       |    |
|--------|-------------|-----------------------|----|
| FC3171 | 0.395       | 1.76926661230913e-32  | 6  |
| FC1810 | 0.395       | 3.25087654697199e-32  | 4  |
| FC5672 | 0.391111111 | 0                     | 15 |
| FC5212 | 0.39        | 1.0380397410698e-39   | 5  |
| FC6467 | 0.39        | 2.18070473377874e-31  | 4  |
| FC3746 | 0.3875      | 3.17998678087906e-31  | 6  |
| FC1412 | 0.385       | 1.4274915202068e-30   | 4  |
| FC6307 | 0.3825      | 2.11483766320977e-30  | 6  |
| FC4845 | 0.3825      | 2.11483766320977e-30  | 6  |
| FC4732 | 0.38        | 9.11864880338069e-30  | 4  |
| FC203  | 0.38        | 9.11864880338069e-30  | 4  |
| FC5077 | 0.38        | 9.11864880338069e-30  | 4  |
| FC2552 | 0.38        | 2.33173703134094e-07  | 3  |
| FC5266 | 0.377777778 | 0                     | 15 |
| FC6279 | 0.3775      | 1.37174394188178e-29  | 6  |
| FC3999 | 0.375       | 3.46098859498968e-29  | 6  |
| FC5520 | 0.37        | 3.45768351871631e-28  | 4  |
| FC3801 | 0.37        | 3.45768351871631e-28  | 4  |
| FC6341 | 0.37        | 3.45768351871631e-28  | 4  |
| FC5628 | 0.367777778 | 0                     | 15 |
| FC5938 | 0.364444444 | 0                     | 15 |
| FC2691 | 0.363333333 | 0                     | 10 |
| FC6350 | 0.36        | 0                     | 15 |
| FC5233 | 0.36        | 4.03620385625286e-172 | 9  |
| FC4563 | 0.36        | 7.83015593722775e-27  | 6  |
| FC3753 | 0.36        | 1.38019230229012e-06  | 3  |
| FC4712 | 0.351111111 | 0                     | 15 |
| FC3840 | 0.35        | 0                     | 15 |
| FC3861 | 0.35        | 1.31745299173529e-162 | 9  |
| FC1385 | 0.35        | 4.78329772220298e-23  | 7  |
| FC2576 | 0.3495      | 0                     | 38 |
| FC6435 | 0.345555556 | 0                     | 15 |
| FC4119 | 0.344444444 | 0                     | 15 |
| FC5156 | 0.344       | 3.11767875285279e-22  | 7  |
| FC3945 | 0.342857143 | 3.19178813676332e-179 | 11 |
| FC6682 | 0.341111111 | 0                     | 15 |
| FC4500 | 0.34        | 1.0679749155895e-21   | 7  |
| FC6181 | 0.336666667 | 2.26114784530357e-29  | 5  |
| FC4015 | 0.336666667 | 2.26114784530357e-29  | 5  |
| FC6377 | 0.335       | 3.98969790651213e-23  | 6  |
| FC3643 | 0.335       | 3.98969790651221e-23  | 6  |
| FC4711 | 0.335       | 5.37348129243896e-23  | 4  |
| FC5185 | 0.333333333 | 0                     | 15 |
| FC5252 | 0.333333333 | 8.90086848105997e-29  | 5  |
| FC1605 | 0.333333333 | 8.90086848105997e-29  | 5  |
| FC4189 | 0.333333333 | 8.90086848105997e-29  | 5  |
| FC3128 | 0.333333333 | 8.90086848105997e-29  | 5  |
| FC3836 | 0.33        | 0                     | 15 |
| FC6126 | 0.33        | 0                     | 15 |
| FC6266 | 0.33        | 0                     | 15 |
| FC3051 | 0.33        | 3.4556712873838e-28   | 5  |

(A) entire Hippo-PPIN

|        |             |                       |    |
|--------|-------------|-----------------------|----|
| FC292  | 0.33        | 2.68791487891444e-22  | 4  |
| FC4008 | 0.325714286 | 4.05854531702464e-246 | 13 |
| FC6604 | 0.325714286 | 1.31292279316984e-161 | 11 |
| FC4588 | 0.324       | 1.26890639244869e-19  | 7  |
| FC4320 | 0.321111111 | 0                     | 15 |
| FC568  | 0.32        | 1.86128228422603e-26  | 5  |
| FC2814 | 0.32        | 1.86128228422603e-26  | 5  |
| FC49   | 0.32        | 3.60833851807688e-05  | 3  |
| FC5851 | 0.32        | 6.2499407008082e-21   | 4  |
| FC6004 | 0.32        | 3.60833851807688e-05  | 3  |
| FC4395 | 0.316666667 | 0                     | 15 |
| FC5905 | 0.313333333 | 1.68284323143658e-246 | 10 |
| FC1827 | 0.313333333 | 2.47731864402753e-25  | 5  |
| FC6414 | 0.311111111 | 0                     | 15 |
| FC6330 | 0.31        | 1.31782399002084e-19  | 4  |
| FC1094 | 0.31        | 7.67642677875596e-05  | 3  |
| FC490  | 0.31        | 7.67642677875596e-05  | 3  |
| FC4370 | 0.306666667 | 3.11988052759344e-24  | 5  |
| FC4940 | 0.306       | 2.06614422702711e-17  | 7  |
| FC6356 | 0.301111111 | 0                     | 15 |
| FC5631 | 0.298888889 | 0                     | 15 |
| FC6297 | 0.298888889 | 0                     | 15 |
| FC6609 | 0.2975      | 4.49607097225264e-18  | 6  |
| FC3957 | 0.2975      | 4.49607097225264e-18  | 6  |
| FC1586 | 0.295       | 1.06214006516613e-17  | 4  |
| FC2475 | 0.294285714 | 1.25806693136106e-200 | 13 |
| FC3765 | 0.291111111 | 0                     | 15 |
| FC4924 | 0.291111111 | 0                     | 15 |
| FC2633 | 0.288       | 2.49568622605282e-15  | 7  |
| FC3338 | 0.285555556 | 0                     | 15 |
| FC5845 | 0.285       | 1.75374368959293e-16  | 4  |
| FC1899 | 0.285       | 1.75374368959291e-16  | 4  |
| FC6292 | 0.2825      | 3.51810274225363e-186 | 8  |
| FC4314 | 0.28        | 0                     | 15 |
| FC4360 | 0.28        | 1.90942987934087e-14  | 7  |
| FC5488 | 0.278888889 | 0                     | 15 |
| FC4618 | 0.277142857 | 1.26337007056792e-116 | 11 |
| FC3326 | 0.275       | 2.4596026996205e-15   | 6  |
| FC4006 | 0.273333333 | 0                     | 12 |
| FC5543 | 0.273333333 | 0                     | 12 |
| FC6275 | 0.273333333 | 0                     | 12 |
| FC6021 | 0.2725      | 4.80309396926692e-15  | 6  |
| FC3382 | 0.272222222 | 0                     | 15 |
| FC3804 | 0.271428571 | 1.9003110947437e-170  | 13 |
| FC4622 | 0.27        | 0                     | 15 |
| FC4462 | 0.268888889 | 0                     | 15 |
| FC3977 | 0.268       | 9.49839573197017e-95  | 9  |
| FC370  | 0.268       | 9.49839573197017e-95  | 9  |
| FC3852 | 0.267777778 | 0                     | 15 |
| FC5253 | 0.265       | 0                     | 14 |
| FC6072 | 0.265       | 3.56531710410161e-14  | 4  |

(A) entire Hippo-PPIN

|        |             |                       |    |
|--------|-------------|-----------------------|----|
| FC5616 | 0.263333333 | 1.14768484916154e-17  | 5  |
| FC3808 | 0.263333333 | 1.14768484916154e-17  | 5  |
| FC6116 | 0.256666667 | 9.54722655288861e-17  | 5  |
| FC5181 | 0.256666667 | 9.54722655288861e-17  | 5  |
| FC4708 | 0.254444444 | 0                     | 15 |
| FC3671 | 0.253333333 | 0                     | 15 |
| FC3105 | 0.253333333 | 0                     | 15 |
| FC6079 | 0.25        | 2.23680404815397e-144 | 13 |
| FC4014 | 0.25        | 2.32622271162158e-11  | 7  |
| FC6496 | 0.25        | 1.49726779299838e-12  | 6  |
| FC2873 | 0.25        | 1.49726779299838e-12  | 6  |
| FC1893 | 0.25        | 1.49726779299838e-12  | 6  |
| FC5088 | 0.25        | 1.49726779299838e-12  | 6  |
| FC3531 | 0.25        | 1.49726779299838e-12  | 6  |
| FC6390 | 0.25        | 1.49726779299838e-12  | 6  |
| FC2153 | 0.25        | 1.49726779299838e-12  | 6  |
| FC986  | 0.25        | 7.51481464872414e-16  | 5  |
| FC5350 | 0.247777778 | 0                     | 15 |
| FC600  | 0.246666667 | 2.0650649716685e-15   | 5  |
| FC719  | 0.245       | 4.90133866889751e-12  | 4  |
| FC6447 | 0.242       | 1.34483684971118e-10  | 7  |
| FC3701 | 0.24        | 0                     | 15 |
| FC4598 | 0.237777778 | 0                     | 15 |
| FC6192 | 0.236666667 | 0                     | 15 |
| FC5085 | 0.235       | 5.19627005825087e-11  | 6  |
| FC3177 | 0.233333333 | 0                     | 15 |
| FC3815 | 0.233333333 | 0                     | 12 |
| FC1808 | 0.2325      | 9.18174038792377e-11  | 6  |
| FC3626 | 0.23        | 1.61229451808322e-10  | 6  |
| FC5637 | 0.228888889 | 0                     | 15 |
| FC6552 | 0.226666667 | 0                     | 15 |
| FC4764 | 0.222       | 8.34886586629223e-09  | 7  |
| FC4366 | 0.221666667 | 2.0205150826214e-122  | 10 |
| FC4102 | 0.221111111 | 0                     | 15 |
| FC3544 | 0.22        | 0                     | 15 |
| FC3702 | 0.22        | 0                     | 15 |
| FC4398 | 0.22        | 1.44006661971252e-09  | 6  |
| FC6480 | 0.22        | 1.44006661971252e-09  | 6  |
| FC47   | 0.22        | 1.44006661971252e-09  | 6  |
| FC4247 | 0.218888889 | 0                     | 15 |
| FC5539 | 0.214444444 | 0                     | 15 |
| FC3893 | 0.214       | 6.00973380772047e-60  | 9  |
| FC4256 | 0.213333333 | 0                     | 15 |
| FC4449 | 0.2125      | 6.96770905732286e-09  | 6  |
| FC4540 | 0.211111111 | 0                     | 15 |
| FC3668 | 0.21        | 2.66881481350281e-102 | 8  |
| FC4369 | 0.21        | 2.66881481350281e-102 | 8  |
| FC4386 | 0.207777778 | 0                     | 15 |
| FC6319 | 0.207777778 | 0                     | 15 |
| FC3397 | 0.207777778 | 0                     | 15 |
| FC5736 | 0.206666667 | 1.30273220524146e-10  | 5  |

(A) entire Hippo-PPIN

|        |                                   |             |    |
|--------|-----------------------------------|-------------|----|
| FC3896 | 0.205                             | 0           | 14 |
| FC5758 | 0.205 3.18692682700389e-08        |             | 6  |
| FC2819 | 0.205 2.86418677718153e-08        |             | 4  |
| FC4166 | 0.20125                           | 0           | 14 |
| FC4572 | 0.2 3.31061225638641e-52          |             | 9  |
| FC3346 | 0.2 5.1160659837938e-07           |             | 7  |
| FC5080 | 0.2 5.1160659837938e-07           |             | 7  |
| FC6161 | 0.2 5.1160659837938e-07           |             | 7  |
| FC1754 | 0.2 5.1160659837938e-07           |             | 7  |
| FC2546 | 0.2 7.58662174147241e-08          |             | 4  |
| FC4194 | 0.195                             | 0           | 14 |
| FC2407 | 0.195 1.9609919410097e-07         |             | 4  |
| FC6664 | 0.192 2.0456385036478e-06         |             | 7  |
| FC4969 | 0.19 7.2390004319754e-09          |             | 5  |
| FC3901 | 0.188333333 6.66188712071978e-88  |             | 10 |
| FC2147 | 0.1875 8.89288862656577e-07       |             | 6  |
| FC5318 | 0.187142857 2.62015669584917e-80  |             | 13 |
| FC5344 | 0.183333333                       | 0           | 15 |
| FC5808 | 0.182 1.06455126364411e-05        |             | 7  |
| FC904  | 0.18 6.83175163359899e-08         |             | 5  |
| FC3235 | 0.178888889 5.49461092710699e-308 |             | 15 |
| FC4829 | 0.176 2.74002248786825e-05        |             | 7  |
| FC3817 | 0.176 2.74002248786825e-05        |             | 7  |
| FC4527 | 0.176 2.74002248786825e-05        |             | 7  |
| FC4427 | 0.175 6.85469501966395e-06        |             | 4  |
| FC5605 | 0.174 3.13481516982053e-39        |             | 9  |
| FC3474 | 0.1725 1.20877669578034e-05       |             | 6  |
| FC4403 | 0.17 6.82229311203009e-05         |             | 7  |
| FC3288 | 0.17 1.82696911640443e-05         |             | 6  |
| FC1414 | 0.17 1.56789481256909e-05         |             | 4  |
| FC5273 | 0.167777778 1.16297764823962e-270 |             | 15 |
| FC3940 | 0.166                             | 0.000123039 | 7  |
| FC5498 | 0.165555556 1.74852337168089e-263 |             | 15 |
| FC3181 | 0.163333333 1.00373710104156e-65  |             | 10 |
| FC5103 | 0.16 5.82616160944961e-246        |             | 15 |
| FC5624 | 0.16 6.9806387774032e-59          |             | 8  |
| FC2132 | 0.16 6.9806387774032e-59          |             | 8  |
| FC6109 | 0.16 8.95637870221681e-05         |             | 6  |
| FC5415 | 0.16 4.1893596129011e-06          |             | 5  |
| FC4517 | 0.154444444 4.875708770432e-229   |             | 15 |
| FC3379 | 0.154444444 4.875708770432e-229   |             | 15 |
| FC5129 | 0.154444444 4.875708770432e-229   |             | 15 |
| FC783  | 0.153333333 9.60041880391303e-58  |             | 10 |
| FC5861 | 0.15                              | 0.001123146 | 7  |
| FC6451 | 0.15                              | 0.000397293 | 6  |

(A) entire Hippo-PPIN

**Members\_GeneID**

FBgn0038965;FBgn0011739;FBgn0039055;FBgn0261456;FBgn0053193  
FBgn0043012;FBgn0010380;FBgn0263350  
FBgn0004907;FBgn0001222;FBgn0020238  
FBgn0034970;FBgn0003345;FBgn0028999  
FBgn0035060;FBgn0031450;FBgn0027363  
FBgn0011225;FBgn0261397;FBgn0010812  
FBgn0011225;FBgn0011273;FBgn0000253  
FBgn0020255;FBgn0039302;FBgn0262743  
FBgn0023388;FBgn0035060;FBgn0032341;FBgn0016693  
FBgn0000319;FBgn0003557;FBgn0016693;FBgn0025865;FBgn0004638;FBgn0  
FBgn0002921;FBgn0013770;FBgn0033259  
FBgn0003392;FBgn0011225;FBgn0025865;FBgn0063485  
FBgn0032961;FBgn0014189;FBgn0010348;FBgn0031661;FBgn0033264;FBgn0  
FBgn0039562;FBgn0034277;FBgn0014868;FBgn0014189;FBgn0010348  
FBgn0036248;FBgn0032906;FBgn0010173  
FBgn0030322;FBgn0032906;FBgn0010173  
FBgn0000319;FBgn0016693;FBgn0025865;FBgn0004638;FBgn0024814;FBgn0  
FBgn0038965;FBgn0011642;FBgn0011739;FBgn0261456;FBgn0262029;FBgn0  
FBgn0025637;FBgn0027066;FBgn0035987;FBgn0053145  
FBgn0015019;FBgn0030086;FBgn0037632;FBgn0003676;FBgn0010621;FBgn0  
FBgn0035872;FBgn0259174;FBgn0035987;FBgn0003557;FBgn0003277;FBgn0  
FBgn0030993;FBgn0029093;FBgn0029118;FBgn0039130;FBgn0035811  
FBgn0000319;FBgn0024814;FBgn0016693;FBgn0035147;FBgn0036309;FBgn0  
FBgn0086656;FBgn0027605;FBgn0037375  
FBgn0022786;FBgn0015019;FBgn0030086;FBgn0037632;FBgn0003676;FBgn0  
FBgn0259481;FBgn0038965;FBgn0003744;FBgn0011739;FBgn0261456  
FBgn0029093;FBgn0029118;FBgn0013770;FBgn0030670;FBgn0035811  
FBgn0027836;FBgn0086356;FBgn0011692  
FBgn0036448;FBgn0036666;FBgn0031450;FBgn0027363;FBgn0024314;FBgn0  
FBgn0020255;FBgn0010621;FBgn0039302;FBgn0003346;FBgn0260990;FBgn0  
FBgn0011826;FBgn0015019;FBgn0030086;FBgn0020369;FBgn0086443;FBgn0  
FBgn0000319;FBgn0016700;FBgn0014009;FBgn0015797;FBgn0051523;FBgn0  
FBgn0003392;FBgn0023388;FBgn0029970;FBgn0020621;FBgn0004638  
FBgn0000319;FBgn0014009;FBgn0014010;FBgn0015790;FBgn0010348;FBgn0  
FBgn0034691;FBgn0025865;FBgn0001961;FBgn0031799;FBgn0000578;FBgn0  
FBgn0004237;FBgn0004401;FBgn0004227  
FBgn0085443;FBgn0031450;FBgn0027363  
FBgn0032246;FBgn0031450;FBgn0027363  
FBgn0000319;FBgn0024814;FBgn0016693;FBgn0014010;FBgn0038519;FBgn0  
FBgn0020255;FBgn0039302;FBgn0037364;FBgn0002638;FBgn0003346;FBgn0  
FBgn0029975;FBgn0014009;FBgn0022246;FBgn0029118;FBgn0037551;FBgn0  
FBgn0015609;FBgn0001075;FBgn0010246;FBgn0000497  
FBgn0083969;FBgn0010348;FBgn0015790;FBgn0262125;FBgn0033339;FBgn0  
FBgn0029118;FBgn0032444;FBgn0020369;FBgn0027329;FBgn0033342;FBgn0  
FBgn0038420;FBgn0002031;FBgn0010551  
FBgn0000319;FBgn0024814;FBgn0026418  
FBgn0036812;FBgn0030969;FBgn0034345;FBgn0004907;FBgn0002031;FBgn0  
FBgn0029975;FBgn0030313;FBgn0016700;FBgn0014009;FBgn0028970;FBgn0  
FBgn0001258;FBgn0003178;FBgn0086443;FBgn0003517;FBgn0038145;FBgn0  
FBgn0010516;FBgn0029093;FBgn0037551;FBgn0037643;FBgn0039674;FBgn0



(A) entire Hippo-PPIN

FBgn0003139;FBgn0030086;FBgn0003676;FBgn0037632;FBgn0010621;FBgn0013726;FBgn0014029;FBgn0026361;FBgn0011710  
FBgn0029975;FBgn0016700;FBgn0014009;FBgn0041191;FBgn0028970;FBgn00000319;FBgn0014143;FBgn0024814;FBgn0027835;FBgn0036309  
FBgn0029975;FBgn0016700;FBgn0001258;FBgn0039923;FBgn0014009;FBgn0029975;FBgn0001258;FBgn0014009;FBgn0038516;FBgn0014189;FBgn00003079;FBgn0004907;FBgn0010269;FBgn0020238  
FBgn0004907;FBgn0038606;FBgn0034970;FBgn0003345;FBgn0067864;FBgn0014868;FBgn0037374;FBgn0025700;FBgn0030992  
FBgn0003079;FBgn0004907;FBgn0035552;FBgn0020238  
FBgn0022246;FBgn0029118;FBgn0037643;FBgn0014189;FBgn0015019;FBgn00000319;FBgn0086656;FBgn0004587;FBgn0022238  
FBgn0020255;FBgn0039302;FBgn0003321;FBgn0052484;FBgn0003346;FBgn00000404;FBgn0020255;FBgn0039302;FBgn0052484;FBgn0003346;FBgn0029975;FBgn0016700;FBgn0001258;FBgn0014009;FBgn0027605;FBgn0016700;FBgn0014009;FBgn0028970;FBgn0053303;FBgn0033205;FBgn0038804;FBgn0020235;FBgn0033761  
FBgn0021874;FBgn0015019;FBgn0030086;FBgn0037632;FBgn0028687;FBgn0039562;FBgn0037718;FBgn0030170;FBgn0032906;FBgn0010173  
FBgn0004907;FBgn0020622;FBgn0013984;FBgn0024248;FBgn0003517;FBgn0029766;FBgn0030313;FBgn0016700;FBgn0004868;FBgn0015797;FBgn0023388;FBgn0035533;FBgn0243516;FBgn0016693;FBgn0260442;FBgn0029118;FBgn0015278;FBgn0037643;FBgn0015622;FBgn0053303;FBgn0015331;FBgn0039025;FBgn0014163;FBgn0029687  
FBgn0036237;FBgn0030086;FBgn0037632;FBgn0003676;FBgn0010621;FBgn0013770;FBgn0030086;FBgn0003676;FBgn0037632;FBgn0010621;FBgn00000319;FBgn0030086;FBgn0003676;FBgn0037632;FBgn0010621;FBgn0029975;FBgn0030313;FBgn0016700;FBgn0014009;FBgn0004926;FBgn0033607;FBgn0015019;FBgn0030086;FBgn0020369;FBgn0028684;FBgn0016700;FBgn0003716;FBgn0015797;FBgn0010348;FBgn0011016;FBgn0030993;FBgn0033782;FBgn0037894;FBgn0035969;FBgn0013675;FBgn0029975;FBgn0014868;FBgn0022246;FBgn0029118;FBgn0028419;FBgn0029975;FBgn0016700;FBgn0014009;FBgn0022246;FBgn0029118;FBgn0262125;FBgn0031818;FBgn0033339;FBgn0024509  
FBgn0032265;FBgn0262125;FBgn0033339;FBgn0024509  
FBgn0003392;FBgn0010774;FBgn0032439;FBgn0261276  
FBgn0263852;FBgn0014868;FBgn0034277;FBgn0031149;FBgn0032015;FBgn0036500;FBgn0036237;FBgn0015019;FBgn0030086;FBgn0011571;FBgn0002528;FBgn0036500;FBgn0036237;FBgn0015019;FBgn0030086;FBgn00000319;FBgn0029975;FBgn0016693;FBgn0037551;FBgn0037894;FBgn0035872;FBgn0036023;FBgn0035213;FBgn0035987;FBgn0037182;FBgn0000100;FBgn0024833;FBgn0039635;FBgn0028695;FBgn0015019;FBgn00260439;FBgn0015622;FBgn0037632;FBgn0005674;FBgn0026409;FBgn0030322;FBgn0027375;FBgn0002906;FBgn0032906;FBgn0010173  
FBgn0025724;FBgn0037549;FBgn0025725  
FBgn0036415;FBgn0004432;FBgn0031392  
FBgn00000319;FBgn0014143;FBgn0014868;FBgn0030850;FBgn0260439;FBgn0035872;FBgn0036023;FBgn0035213;FBgn0035987;FBgn0261641;FBgn00259481;FBgn0038965;FBgn0016131;FBgn0011739;FBgn0261456;FBgn0037719;FBgn0003022;FBgn0035213  
FBgn0029118;FBgn0039635;FBgn0037643;FBgn0028695;FBgn0015622;FBgn00

(A) entire Hippo-PPIN

FBgn0002921;FBgn0032005;FBgn0031534;FBgn0086558;FBgn0037874;FBgn0010774;FBgn0032439;FBgn0014189;FBgn0037569  
FBgn0029975;FBgn0014868;FBgn0028419;FBgn0086357;FBgn0030073;FBgn0035720;FBgn0002783;FBgn0035872;FBgn0014870;FBgn0052685  
FBgn0020235;FBgn0004462;FBgn0035811;FBgn0002284  
FBgn0000319;FBgn0261279;FBgn0024814;FBgn0010380;FBgn0039955;FBgn0041627;FBgn0032906;FBgn0010173;FBgn0011774  
FBgn0000319;FBgn0024814;FBgn0016693;FBgn0035918;FBgn0036309;FBgn0000319;FBgn0024814;FBgn0035136;FBgn0016693;FBgn0261797;FBgn0010660;FBgn0026143;FBgn0026207;FBgn0034118  
FBgn0010660;FBgn0036997;FBgn0026207;FBgn0034118  
FBgn0040308;FBgn0024814;FBgn0014010;FBgn0038519  
FBgn0004868;FBgn0015797;FBgn0015790  
FBgn0029975;FBgn0031975;FBgn0001258;FBgn0032429;FBgn0053303;FBgn0037834;FBgn0005648;FBgn0004903;FBgn0052685;FBgn0261380;FBgn00000256;FBgn0261259;FBgn0000043;FBgn0261458;FBgn0024238;FBgn0035471;FBgn0004363;FBgn0062442;FBgn0001124  
FBgn0027568;FBgn0037894;FBgn0004462;FBgn0035440  
FBgn0029854;FBgn0062442;FBgn0037465;FBgn0035165  
FBgn0016700;FBgn0001258;FBgn0014009;FBgn0035401;FBgn0030993;FBgn0029118;FBgn0037643;FBgn0036237;FBgn0015622;FBgn0010803;FBgn0037312;FBgn0023529;FBgn0001218;FBgn0031256;FBgn0014002;FBgn0036237;FBgn0015019;FBgn0028684;FBgn0030086;FBgn0034931;FBgn0015791;FBgn0016700;FBgn0004868;FBgn0027605;FBgn0015797;FBgn0039562;FBgn0039580;FBgn0015797;FBgn0037718;FBgn0014010;FBgn0004397;FBgn0028479;FBgn0035432  
FBgn0029975;FBgn0014868;FBgn0032429;FBgn0030992;FBgn0053303;FBgn0029975;FBgn0014868;FBgn0014009;FBgn0032429;FBgn0030992;FBgn0000100;FBgn0039635;FBgn0030612;FBgn0024556;FBgn0037709;FBgn0035720;FBgn0040045;FBgn0003449;FBgn0003261;FBgn0029979;FBgn0014009;FBgn0036623;FBgn0037894;FBgn0260439;FBgn0020497;FBgn0029975;FBgn0016700;FBgn0014009;FBgn0041191;FBgn0028970;FBgn0000319;FBgn0260439;FBgn0027571;FBgn0015794;FBgn0028695;FBgn0005674;FBgn0026409;FBgn0039635;FBgn0031497;FBgn0015622;FBgn0030313;FBgn0016700;FBgn0014009;FBgn0028970;FBgn0033205;FBgn0029975;FBgn0014868;FBgn0039304;FBgn0086357;FBgn0030073;FBgn0087035;FBgn0031951;FBgn0032515;FBgn0034246;FBgn0028734;FBgn0025637;FBgn0027084;FBgn0033109;FBgn0030061;FBgn0027889  
FBgn0000319;FBgn0024814;FBgn0027494;FBgn0036309;FBgn0035440  
FBgn0000319;FBgn0001258;FBgn0024814;FBgn0029608;FBgn0011760;FBgn0002921;FBgn0032005;FBgn0031534;FBgn0037249;FBgn0037874;FBgn0038275;FBgn0261456;FBgn0038476;FBgn0030061  
FBgn0036812;FBgn0037728;FBgn0032198;FBgn0261458;FBgn0033518;FBgn0036448;FBgn0003557;FBgn0034068;FBgn0001230;FBgn0004638  
FBgn0004907;FBgn0261873;FBgn0261854;FBgn0000163;FBgn0020238  
FBgn0038965;FBgn0053895;FBgn0011739;FBgn0262029;FBgn0038826  
FBgn0027598;FBgn0004907;FBgn0024189;FBgn0035591;FBgn0051358  
FBgn0036519;FBgn0036500;FBgn0015019;FBgn0030086;FBgn0034931;FBgn00003044;FBgn0036237;FBgn0015019;FBgn0030086;FBgn0034931;FBgn0036519;FBgn0031298;FBgn0036237;FBgn0001216;FBgn0015019;FBgn0023537;FBgn0038326;FBgn0033879;FBgn0028479;FBgn0035811

(A) entire Hippo-PPIN

FBgn0036702;FBgn0002031;FBgn0024992;FBgn0010551  
FBgn0025457;FBgn0035136;FBgn0260439;FBgn0044323;FBgn0030086;FBgn00  
FBgn0036237;FBgn0030086;FBgn0003676;FBgn0037632;FBgn0040273;FBgn00  
FBgn0086656;FBgn0035715;FBgn0036740;FBgn0035589;FBgn0036805;FBgn00  
FBgn0000319;FBgn0034614;FBgn0016693;FBgn0260439;FBgn0037551;FBgn00  
FBgn0020255;FBgn0037364;FBgn0002638;FBgn0036497;FBgn0034113  
FBgn0033663;FBgn0039776;FBgn0039784;FBgn0014002;FBgn0026190  
FBgn0031296;FBgn0000181;FBgn0086904  
FBgn0021795;FBgn0050338;FBgn0039635;FBgn0032393  
FBgn0028734;FBgn0000559;FBgn0064225  
FBgn0029975;FBgn0014868;FBgn0028419;FBgn0036623;FBgn0033048;FBgn00  
FBgn0024806;FBgn0025865;FBgn0001961;FBgn0004638;FBgn0011742;FBgn00  
FBgn0038708;FBgn0029118;FBgn0037643;FBgn0020236;FBgn0004888  
FBgn0003132;FBgn0036500;FBgn0036237;FBgn0015019;FBgn0030086;FBgn00  
FBgn0025724;FBgn0027496;FBgn0035195;FBgn0010348  
FBgn0262685;FBgn0000253;FBgn0034368  
FBgn0000253;FBgn0001233;FBgn0034368  
FBgn0020626;FBgn0028379;FBgn0261710;FBgn0029687;FBgn0035165  
FBgn0000319;FBgn0036579;FBgn0024814;FBgn0016693;FBgn0032456;FBgn00  
FBgn0000319;FBgn0029975;FBgn0014868;FBgn0086357;FBgn0087013;FBgn00  
FBgn0026372;FBgn0033912;FBgn0025286;FBgn0039359;FBgn0016726;FBgn00  
FBgn0037551;FBgn0028695;FBgn0015019;FBgn0020369;FBgn0028684;FBgn00  
FBgn0010660;FBgn0038722;FBgn0086558;FBgn0036105;FBgn0034118;FBgn00  
FBgn0010660;FBgn0027868;FBgn0033737;FBgn0086558;FBgn0034118;FBgn00  
FBgn0010247;FBgn0039735;FBgn0016685;FBgn0002780  
FBgn0001218;FBgn0003261;FBgn0037939;FBgn0263603;FBgn0011571;FBgn00  
FBgn0029975;FBgn0014868;FBgn0039304;FBgn0086357;FBgn0032015;FBgn00  
FBgn0029975;FBgn0014868;FBgn0030670;FBgn0033048;FBgn0086357;FBgn00  
FBgn0035121;FBgn0087035;FBgn0031951;FBgn0034246;FBgn0028734;FBgn00  
FBgn0029975;FBgn0016700;FBgn0014868;FBgn0037293;FBgn0028970;FBgn00  
FBgn0027066;FBgn0004177;FBgn0029687;FBgn0038766  
FBgn0025700;FBgn0021795;FBgn0028327;FBgn0011016  
FBgn0016700;FBgn0033906;FBgn0004868;FBgn0015797;FBgn0028970;FBgn00  
FBgn0029975;FBgn0028419;FBgn0260439;FBgn0037894;FBgn0015622;FBgn00  
FBgn0011211;FBgn0010217;FBgn0020235;FBgn0016691;FBgn0004363;FBgn00  
FBgn0014868;FBgn0038626;FBgn0032429;FBgn0030992;FBgn0038387;FBgn00  
FBgn0016687;FBgn0261458;FBgn0033101;FBgn0011704;FBgn0259243;FBgn00  
FBgn0032833;FBgn0019960;FBgn0037828;FBgn0002031;FBgn0004363;FBgn00  
FBgn0044323;FBgn0030086;FBgn0037908;FBgn0003676;FBgn0037632;FBgn00  
FBgn0040066;FBgn0015754;FBgn0044323;FBgn0030086;FBgn0003676;FBgn00  
FBgn0260439;FBgn0044323;FBgn0083950;FBgn0030086;FBgn0000121;FBgn00  
FBgn0033663;FBgn0036023;FBgn0261274;FBgn0014002;FBgn0030734;FBgn00  
FBgn0015278;FBgn0015622;FBgn0015019;FBgn0024556;FBgn0039580;FBgn00  
FBgn0030208;FBgn0036237;FBgn0015019;FBgn0030086;FBgn0034931;FBgn00  
FBgn0015019;FBgn0003139;FBgn0030086;FBgn0037540;FBgn0034931;FBgn00  
FBgn0015278;FBgn0015622;FBgn0027515;FBgn0053303;FBgn0024556;FBgn00  
FBgn0030313;FBgn0016700;FBgn0004868;FBgn0028970;FBgn0015797;FBgn00  
FBgn0021825;FBgn0004907;FBgn0039735;FBgn0016685;FBgn0036687;FBgn00  
FBgn0000044;FBgn0261458;FBgn0065032;FBgn0025865;FBgn0063485;FBgn00  
FBgn0029975;FBgn0014868;FBgn0033048;FBgn0086357;FBgn0032015;FBgn00  
FBgn0032833;FBgn0002031;FBgn0004363;FBgn0035761

(A) entire Hippo-PPIN

FBgn0000319;FBgn0024814;FBgn0012036;FBgn0035147;FBgn0036309  
FBgn0085201;FBgn0001258;FBgn0000100;FBgn0031492;FBgn0004227  
FBgn0087035;FBgn0028734;FBgn0261931;FBgn0038609;FBgn0039016  
FBgn0087035;FBgn0031951;FBgn0034246;FBgn0037328;FBgn0003279  
FBgn0014868;FBgn0030850;FBgn0027568;FBgn0260439;FBgn0037894;FBgn00  
FBgn0014868;FBgn0086442;FBgn0025683;FBgn0030992;FBgn0035432;FBgn00  
FBgn0025674;FBgn0039359;FBgn0029897;FBgn0036825;FBgn0013325;FBgn00  
FBgn0036237;FBgn0015019;FBgn0030086;FBgn0034931;FBgn0037632;FBgn00  
FBgn0041191;FBgn0015797;FBgn0020240;FBgn0028970;FBgn0014010;FBgn00  
FBgn0035872;FBgn0036023;FBgn0002021;FBgn0035987;FBgn0261641;FBgn00  
FBgn0013763;FBgn0027791;FBgn0039776;FBgn0033149;FBgn0014002;FBgn00  
FBgn0040064;FBgn0033879;FBgn0028479;FBgn0033883;FBgn0025352;FBgn00  
FBgn0000045;FBgn0000043;FBgn0261458;FBgn0000042;FBgn0033075;FBgn00  
FBgn0004907;FBgn0038167;FBgn0037465;FBgn0260972;FBgn0025803;FBgn00  
FBgn0035872;FBgn0034644;FBgn0036023;FBgn0035213;FBgn0035987;FBgn00  
FBgn0037607;FBgn0039425;FBgn0036784;FBgn0000064;FBgn0050410;FBgn00  
FBgn0040273;FBgn0037081;FBgn0019949;FBgn0003277;FBgn0002780  
FBgn0086357;FBgn0053303;FBgn0261593;FBgn0026409;FBgn0019830;FBgn00  
FBgn0010380;FBgn0263351;FBgn0024833;FBgn0030089;FBgn0039132  
FBgn0034133;FBgn0016691;FBgn0016120;FBgn0020235  
FBgn0027598;FBgn0015286;FBgn0031537;FBgn0260946;FBgn0035892;FBgn00  
FBgn0015622;FBgn0053303;FBgn0050194;FBgn0039580;FBgn0026409;FBgn00  
FBgn0014868;FBgn0038626;FBgn0051729;FBgn0261722;FBgn0032429;FBgn00  
FBgn0260439;FBgn0020497;FBgn0028692;FBgn0028695;FBgn0020369;FBgn00  
FBgn0036728;FBgn0019960;FBgn0011227;FBgn0021906;FBgn0250814;FBgn00  
FBgn0029975;FBgn0014868;FBgn0035195;FBgn0036623;FBgn0030670;FBgn00  
FBgn0030313;FBgn0016700;FBgn0014009;FBgn0015789;FBgn0053303;FBgn00  
FBgn0000317;FBgn0011225;FBgn0002938;FBgn0004687;FBgn0005634;FBgn00  
FBgn0027496;FBgn0035195;FBgn0010348;FBgn0029687;FBgn0037108;FBgn00  
FBgn0029975;FBgn0014868;FBgn0039304;FBgn0033048;FBgn0086357;FBgn00  
FBgn0029975;FBgn0014868;FBgn0029118;FBgn0035195;FBgn0037643;FBgn00  
FBgn0261064;FBgn0014009;FBgn0261049;FBgn0014010;FBgn0032429;FBgn00  
FBgn0035715;FBgn0086656;FBgn0027605;FBgn0037231;FBgn0035589;FBgn00  
FBgn0014868;FBgn0038626;FBgn0028419;FBgn0260439;FBgn0037894;FBgn00  
FBgn0015278;FBgn0015622;FBgn0261014;FBgn0053303;FBgn0039580;FBgn00  
FBgn0038474;FBgn0039129;FBgn0025286;FBgn0039359;FBgn0029897;FBgn00  
FBgn0025637;FBgn0037134;FBgn0031043;FBgn0023423;FBgn0026175;FBgn00  
FBgn0003392;FBgn0023388;FBgn0035533;FBgn0003683;FBgn0036666;FBgn00  
FBgn0262126;FBgn0038947;FBgn0033460;FBgn0262125;FBgn0033339;FBgn00  
FBgn0260439;FBgn0031549;FBgn0037894;FBgn0035771;FBgn0003742;FBgn00  
FBgn0029975;FBgn0014868;FBgn0034032;FBgn0051729;FBgn0028419;FBgn00  
FBgn0032880;FBgn0010612;FBgn0014391;FBgn0016691;FBgn0026761;FBgn00  
FBgn0027605;FBgn0260439;FBgn0037894;FBgn0015622;FBgn0086357;FBgn00  
FBgn0034697;FBgn0016700;FBgn0023506;FBgn0014009;FBgn0040087;FBgn00  
FBgn0036519;FBgn0015019;FBgn0030086;FBgn0034931;FBgn0001230;FBgn00  
FBgn0027338;FBgn0020255;FBgn0011823;FBgn0031145;FBgn0037924;FBgn00  
FBgn0027338;FBgn0020255;FBgn0022213;FBgn0011823;FBgn0020497;FBgn00  
FBgn0029975;FBgn0014868;FBgn0038922;FBgn0030670;FBgn0086357;FBgn00  
FBgn0029975;FBgn0014868;FBgn0051729;FBgn0028419;FBgn0086357;FBgn00  
FBgn0029975;FBgn0014868;FBgn0035195;FBgn0030670;FBgn0086357;FBgn00  
FBgn0085201;FBgn0034259;FBgn0039936;FBgn0005411;FBgn0038090

(A) entire Hippo-PPIN

FBgn0004856;FBgn0031621;FBgn0035136;FBgn0030365;FBgn0052528;FBgn0017550;FBgn0085436;FBgn0032796;FBgn0000258;FBgn0033984;FBgn0025724;FBgn0037549;FBgn0025725;FBgn0037610  
FBgn0029975;FBgn0014868;FBgn0037203;FBgn0029709;FBgn0086357;FBgn004907;FBgn0020238;FBgn0013276;FBgn0003079;FBgn0012036;FBgn0034141;FBgn0035872;FBgn0036023;FBgn0035987;FBgn0261641;FBgn00260934;FBgn0004907;FBgn0028833;FBgn0041210;FBgn0038197;FBgn00260934;FBgn0004907;FBgn0032670;FBgn0034145;FBgn0041210;FBgn0020224;FBgn0027598;FBgn0024811;FBgn0020622;FBgn0035101;FBgn00259139;FBgn0004237;FBgn0037906;FBgn0001215  
FBgn0000044;FBgn0261458;FBgn0025865;FBgn0000246;FBgn0011703;FBgn0011823;FBgn0050447;FBgn0061200;FBgn0033264  
FBgn0004856;FBgn0035136;FBgn0261609;FBgn0030719;FBgn0027835;FBgn0053886;FBgn0037354;FBgn0002031;FBgn0033250;FBgn0010551  
FBgn0030313;FBgn0016700;FBgn0004381;FBgn0028970;FBgn0016701;FBgn0027873;FBgn0037248;FBgn0019949;FBgn0025455;FBgn0003277;FBgn0011211;FBgn0001258;FBgn0035032;FBgn0014391;FBgn0016691;FBgn0005585;FBgn0036812;FBgn0037728;FBgn0035904;FBgn0032198;FBgn0029512;FBgn0029113;FBgn0037715;FBgn0013726;FBgn0026170;FBgn0051992;FBgn0004903;FBgn0052685;FBgn0029979;FBgn0261710  
FBgn0029975;FBgn0014868;FBgn0030606;FBgn0030341;FBgn0035195;FBgn0000047;FBgn0000709;FBgn0030951;FBgn0261458;FBgn0011726;FBgn0011305;FBgn0025637;FBgn0004242;FBgn0023423;FBgn0015509;FBgn00000117;FBgn0025637;FBgn0023423;FBgn0026175;FBgn0026597;FBgn0032812;FBgn0027548;FBgn0002638;FBgn0033160  
FBgn0014868;FBgn0030606;FBgn0030341;FBgn0030670;FBgn0038465;FBgn0015024;FBgn0002413;FBgn0010380;FBgn0035110;FBgn0030631;FBgn0052451;FBgn0260010;FBgn0002031;FBgn0003889;FBgn0038252;FBgn0023213;FBgn0035827;FBgn0031011;FBgn0035823;FBgn0001942;FBgn0015609;FBgn0001075;FBgn0029835;FBgn0000497  
FBgn0013770;FBgn0015278;FBgn0015622;FBgn0053303;FBgn0039580;FBgn0037728;FBgn0000100;FBgn0015278;FBgn0039635;FBgn0038733;FBgn0014868;FBgn0027583;FBgn0051729;FBgn0030670;FBgn0030992;FBgn0032341;FBgn0016693;FBgn0001961;FBgn0004638;FBgn0261456;FBgn0014868;FBgn0038626;FBgn0051729;FBgn0027568;FBgn0028419;FBgn0000044;FBgn0261397;FBgn0000253;FBgn0004687;FBgn0005634;FBgn0040512;FBgn0025724;FBgn0028968;FBgn0028969;FBgn0027496;FBgn0026136;FBgn0028737;FBgn0037728;FBgn0032198;FBgn0000557;FBgn0030322;FBgn0035987;FBgn0261278;FBgn0003612;FBgn0260648  
FBgn0038474;FBgn0039867;FBgn0039359;FBgn0029897;FBgn0013325;FBgn0026252;FBgn0037894;FBgn0086357;FBgn0035771;FBgn0053303;FBgn0026372;FBgn0025286;FBgn0039359;FBgn0039790;FBgn0010409;FBgn0003449;FBgn0261791;FBgn0261933;FBgn0023167;FBgn0261790;FBgn0005674;FBgn0027084;FBgn0034401;FBgn0027093;FBgn0027090;FBgn0001235;FBgn0004107;FBgn0031450;FBgn0003093;FBgn0027363;FBgn00

(A) entire Hippo-PPIN

**Members\_GeneSymbol**

mats;wts;Rassf;hpo;sav  
AP-2sigma;Bap;alpha-Adaptin  
14-3-3zeta;Hsf;14-3-3epsilon  
yki;sd;nerfin-1  
Eps-15;Hrs;Stam  
jar;didum;unc-45  
jar;And;Cam  
ran;Nup358;Fs(2)Ket  
Dap160;Eps-15;Reps;Past1  
Chc;Su(dx);Past1;Cortactin;drk;mop;hpo;ena;Hip1  
Atpalpha;Cp1;CG11210  
shi;jar;Cortactin;Lasp  
CG1416;Hel25E;Arf79F;Gmd;Nup50;sec13  
Gp93;CG6370;Ost48;Hel25E;Arf79F  
ssp;RPA2;RpA-70  
CG15220;RPA2;RpA-70  
Chc;Past1;Cortactin;drk;Clc;Cpn;hpo;Act87E;ena;Hip1  
mats;Zyx;wts;hpo;d;ena  
skpA;Eb1;CG3689;CG33145  
Cctgamma;CG7033;Tcp-1eta;T-cp1;Cct5;CG5525;Tcp-1zeta;CG8258  
CG7185;Nedd4;CG3689;Su(dx);Rpl1215;lig  
Mec2;cathD;Suchb;CG5854;CG12262  
Chc;Clc;Past1;Gale;Hip1;CG12264  
shrb;Vps4;kat-60L1  
Hira;Cctgamma;CG7033;Tcp-1eta;T-cp1;Cct5;CG5525;CG8258;Tcp-1zeta  
Mob2;mats;trc;wts;hpo  
cathD;Suchb;Cp1;Pis;CG12262  
Dgp-1;tum;pav  
mop;TSG101;Hrs;Stam;Plap;drk  
ran;Cct5;Nup358;RanGap;yata;Nxt1  
Pp2B-14D;Cctgamma;CG7033;Pros45;Aats-asn;Rpt1;CG1416;Tcp-1zeta  
Chc;Rab1;Rab2;Rab6;CG31523;Rab5;CG31522;Arf79F;Rab7  
shi;Dap160;Nek2;Pkn;drk  
Chc;Rab2;Rab5;Rab11;Arf79F;Hip1  
synj;Cortactin;Sop2;Pez;ena;drk  
Hrb87F;Pep;nonA  
spri;Hrs;Stam  
CG5168;Hrs;Stam  
Chc;Clc;Past1;Rab5;Prx3;Hip1  
ran;Nup358;Rab23;Bj1;RanGap;emb;Nxt1  
CG1444;Rab2;Rpp30;Suchb;Gie;skap;Hel25E;Cctgamma;wal;Gp93;Droj2;C  
CadN;ft;Myo61F;ds  
CG34133;Arf79F;Rab11;sec23;sec31;sec13  
Suchb;CG5525;Pros45;Tcp-1zeta;CG8258;Rpt1;CG12264  
CG10311;l(2)37Cc;l(2)03709  
Chc;Clc;Hsc70Cb  
Nufip;CG7288;CG5174;14-3-3zeta;l(2)37Cc;l(2)03709  
CG1444;CG11697;Rab1;Rab2;betaggt-II;CG33303;Mec2;Sc2;hop;Rab6;C  
ImpL3;PyK;Aats-asn;sta;Droj2;CG1416;mt;Coll;R;CG4169;Tcp-1zeta  
wal;cathD;Gie;skap;CG1907;CG12262

(A) entire Hippo-PPIN

PpV;CG7033;T-cp1;Tcp-1eta;Cct5;slmb;Tap42;tws;CG8258;Tcp-1zeta  
pnut;Sep2;Sep5;Sep1  
CG1444;Rab1;Rab2;Rheb;betaggt-II;Gie;CG33303;wal;Mec2;Rab6;CG141  
Chc;croc;Clc;Dp1;Hip1  
CG1444;Rab1;ImpL3;MED26;Rab2;Gie;Hel25E;CG33303;wal;Mec2;CG16  
CG1444;ImpL3;Rab2;CG5840;Hel25E;CG33303;Mec2;Tapdelta;ox;Rab5;C  
phl;14-3-3zeta;Dsor1;14-3-3epsilon  
14-3-3zeta;CG15803;yki;sd;Patj;inaD  
Ost48;jagn;CG5885;CG33253  
phl;14-3-3zeta;CG11350;14-3-3epsilon  
Rpp30;Sucb;skap;Hel25E;Cctgamma;Ucp4B;Aats-asn;Rpt1;wal;Gp93;Gfat  
Chc;shrb;B52;lolal  
ran;Nup358;sbr;Sk2;RanGap;Nxt1  
CycA;ran;Nup358;Sk2;RanGap;Nxt1  
CG1444;Rab1;ImpL3;Rab2;Vps4;Gie;CG33303;wal;CG1416;Arf79F;Fatp;C  
Rab1;Rab2;betaggt-II;CG33303;CG2064;Mec2;wal;Rab6;CG1416;Rab5;m  
CG10877;ATPsyn-gamma;CG8778  
Nle;Cctgamma;CG7033;Tcp-1eta;Rpt1;Cct5;CG5525;Arp87C;CG8258;Tcp  
Gp93;P58IPK;CG2990;RPA2;RpA-70  
14-3-3zeta;Pi3K21B;InR;chico;sta;CG4169  
CG15784;CG11697;Rab1;Gdi;Rab6;Rab5;Rab7;CG3711  
Dap160;Cip4;Vrp1;Past1;rhea;drk;hpo;TSG101;WASp  
Sucb;Pi3K68D;skap;Cnx99A;CG33303;EfTuM;wal;Gp93;Aats-glupro;Gfat2  
abs;CG7023;fax;Vap-33-1  
viaf;CG7033;Tcp-1eta;T-cp1;Cct5;CG5525;shd;CG3313;CG8258  
Cp1;CG7033;T-cp1;Tcp-1eta;Cct5;CG18179;CG3313;tws;Tap42;CG8258;  
Chc;CG7033;T-cp1;Tcp-1eta;Cct5;CG11178;Tap42;tws;CG8258;CG12333  
CG1444;CG11697;Rab1;Rab2;eIF-2beta;CG33303;CG2064;Mec2;hop;Ral  
CG9062;Cctgamma;CG7033;Pros45;Tbp-1;Rpt1;CG1416;Rpt4;Tcp-1zeta  
Rab1;tkv;Rab6;Arf79F;SsRbeta;KdelR  
Mec2;sug;Ranbp9;CG4476;mt;Coll;CG4169  
CG1444;Ost48;Rpp30;Sucb;Kr-h2;Nup154;skap;CG33303;Gp93;Gyk;Droj2  
CG1444;Rab1;Rab2;Rpp30;Sucb;skap;CG33303;Droj2;Gp93;wal;CG1416;  
sec23;CG9536;sec31;sec13  
CG18301;sec23;sec31;sec13  
shi;Ref1;Ref2;opa1-like  
l(2)k12914;Ost48;CG6370;CG1518;CG7830;OstStt3;CG33303  
CG7275;viaf;Cctgamma;CG7033;caz;CG2812;T-cp1;Tcp-1eta;Cct5;CG55;  
LanB2;CG7275;viaf;Cctgamma;CG7033;CG2812;T-cp1;Tcp-1eta;Cct5;Enc  
Chc;CG1444;Past1;Gie;Ranbp9;CG33303;Gyk;wal;Gfat2;Mec2;Cyp12d1-c  
CG7185;CG18179;CG2199;CG3689;ArfGAP3;Ef1alpha48D  
RpLP0;AP-47;CG11876;Rpn1;Cctgamma;Aats-asn;EfTuM;CG8199;Mpcp;  
Pp2A-29B;Cnx99A;Tcp-1eta;Aats-glupro;Mpcp;CG6370;CG17259;MRP;C  
CG15220;RecQ5;mus309;RPA2;RpA-70  
beta'Cop;CG7878;alphaCop  
CG7768;Cyp1;AIF  
Chc;croc;Ost48;CG8408;Pp2A-29B;Ranbp9;Sec61alpha;Karybeta3;Hip14;  
CG7185;CG18179;CG2199;CG3689;CG42724;CG9911;CG31235  
Mob2;mats;Cdk4;wts;hpo;cdc2c;Cdc37  
bocksbeutel;Ote;CG2199  
Sucb;CG11876;skap;Rpn1;Cnx99A;Cctgamma;betaCop;EfTuM;CG8199;A

(A) entire Hippo-PPIN

Atpalpha;Snx6;CG2774;Ubi-p5E;Tctp;Sap47  
Ref1;Ref2;Hel25E;tex  
CG1444;Ost48;Kr-h2;Sec61alpha;CG10962;CG33303;wal;Gp93;Kap-alpha  
CG10077;mor;CG7185;Psi;ZAP3  
ATPsyn-gamma;Pk17E;CG12262;Pros26  
Chc;IqfR;Clc;Bap;CG41099;CG3529  
Ku80;RPA2;RpA-70;Irbp  
Chc;Clc;Past1;Cdc6;Hip1;CG11327  
Chc;Clc;CG6905;Past1;Dhc64C;Hip1  
Nup214;CDC45L;mbo;Nup62  
Nup214;CG5955;mbo;Nup62  
Jafrac2;Clc;Rab5;Prx3  
Gdi;Rab6;Rab11  
CG1444;Tg;ImpL3;CG5446;CG33303;CG9536;sec13;wal;Mec2;Tapdelta;c  
Art1;Pabp2;Rb97D;ZAP3;mRpL37;CG10777  
capu;Fhos;Act42A;capt;Fim;chic  
Sc2;porin;CG1458;Got1  
Cand1;Ranbp9;Pk17E;CG14969  
CG3566;CG1458;CG1105;CG13887  
Rab1;ImpL3;Rab2;CG1291;Mec2;wal;Tapdelta;CG1416;l(1)G0320;Rab5;n  
Suchb;skap;viaf;Cnx99A;Aats-trp;Cctgamma;Tcp-1eta;Gyk;wal;Droj2;CG55  
CG11999;CG2918;Hsc70-3;CG4164;Pdi;Gp93;ERp60;CG30378;Ugt;CG2  
viaf;Cctgamma;Tbp-1;CG7033;CG2812;T-cp1;Rpt1;Tcp-1eta;CG10688;CC  
Rab14;Rab1;Gdi;Vps4;Rab6;betaggt-II;Rab5;Rab7;CG3711  
Gp93;Gfat2;Rab6;P58IPK;Rab5;CG9629  
Vinc;CG4389;ZnT63C  
CG1444;Ost48;CG5446;CG33253;CG33303;Mec2;wal;CG7197;Sc2;mge;  
CG1444;Ost48;Rab2;CG5446;CG33253;CG33303;Mec2;wal;Tapdelta;CG  
RpLP0;CG11876;CG5599;EFTuM;CG8199;Mpcp;Gfat2;CG1129;r  
CG10077;CR12460;snf;Rm62;CG10777;nonA;nonA-l  
Rab2;CG4729;Ranbp9;Pp2A-29B;emb;Sec61alpha;Ca-P60A;ZnT63C;Ppt1  
CG1444;Rab1;Rab2;Rheb;betaggt-II;Aats-trp;CG33303;wal;Aprt;Rab6;CG  
Chc;Pp2A-29B;CG3523;Rab-RP4;Rpn1;Cctgamma;betaCop;Aats-asn;Gfat  
Aats-glupro;Mpcp;CG11876;CG17259;Cnx99A;bor;CG8258  
CG11697;Rab1;Rab2;betaggt-II;CG2064;Rab6;Dcp-1;Rab5;KdelR;Rab7;C  
CG1444;Ost48;CG10425;Sec61alpha;CG10962;CG33303;wal;Gp93;CG63  
AGO2;r2d2;loqs;Dcr-2;Fmr1;Rm62;Dcr-1  
skpA;Aats-lys;coro;CG1785;ball  
Chc;Clc;RpS10a;Hip1;CG14969  
Chc;ImpL3;Clc;CG3091;ctp;Hip1  
Atpalpha;Snx6;CG2774;eIF3-S10;Tctp;Egfr  
CG3817;hpo;kuk;CG1785  
Nufip;CG16817;eEF1delta;capt;Prx2540-2;Hop;TER94;scf;Der-2;Nacalphe  
mop;Su(dx);casp;Hsp68;drk  
14-3-3zeta;sdt;aPKC;baz;14-3-3epsilon  
mats;His4;CG33895;wts;d;CG17838  
cindr;14-3-3zeta;sns;CG4611;CG31358  
CG7650;CG7275;Cctgamma;CG7033;CG2812;T-cp1;Tcp-1eta;Hsc70-4;C  
Pcl;viaf;Cctgamma;CG7033;CG2812;T-cp1;Tcp-1eta;Cct5;CG5525;His3;C  
CG7650;Atg4;viaf;Hsc70-1;Cctgamma;CG7033;T-cp1;Tcp-1eta;Hsp70Bb;C  
CG17896;CG5044;CG6543;CG4389;CG12262



(A) entire Hippo-PPIN

CG6512;l(2)37Cc;CG2658;l(2)03709  
Bub3;CG6905;Pp2A-29B;Cka;CG7033;T-cp1;Tcp-1eta;Cct5;tws;Tap42;CG  
viaf;CG7033;T-cp1;Tcp-1eta;Spt5;RpS21;Cct5;tws;Tap42;CG8258;Tcp-1z  
shrb;CG10103;CG6259;CHMP2B;Chmp1;vps24;vps2  
Chc;CG9752;Past1;Pp2A-29B;Gie;Ranbp9;CG33303;CG1665;Gyk;Gfat2;C  
ran;Rab23;Bj1;ran-like;CG8060  
ERp60;PH4alphaEFB;CG9698;Pdi;PH4alphaMP  
CG4415;bic;Nacalpa  
Tapdelta;CG30338;CG11876;CG12264  
Fmr1;Ef2b;RpL5  
CG1444;Ost48;Kr-h2;CG4729;CG7881;Sec61alpha;CG7830;CG33303;CG  
DIP2;Cortactin;Sop2;drk;Arp14D;Cpn;hpo;Act87E;ena;Hip1  
CG6255;Sucb;skap;ATPCL;Scsalpha  
Pp1-13C;CG7275;viaf;Cctgamma;CG7033;CG2812;Tcp-1eta;CG5525;CG  
beta'Cop;epsilonCOP;Sac1;Arf79F  
CG43155;Cam;CG5482  
Cam;Hsp83;CG5482  
Osbp;fan;nocte;Vap-33-1;CG13887  
Chc;CG5027;Clc;Past1;MRP;Hip1;CG1667  
Chc;CG1444;Ost48;Sec61alpha;Karybeta3;CG33303;Cyp9b2;MSBP;Atpal  
RpL23A;RpS23;RpL31;RpL27;RpL29;RpL17;RpL26;RpL11;RpS15;RpL27/  
Gie;Rpn1;Cctgamma;Pros45;Tbp-1;Aats-asn;wol;Rpt1;CG5027;CG5525;C  
Nup214;Nup58;Ubi-p5E;bls4;Nup62;Sap47  
Nup214;Nup107;Nup54;Ubi-p5E;Nup62;Sap47  
Parp;CG7911;Nlp;mod  
Hsc70-3;Rm62;CG14718;Zn72D;caz;mod;glo;CG10077;CG30122;pasha;C  
CG1444;Ost48;CG10425;Sec61alpha;CG7830;CG33303;CG2064;CG637C  
CG1444;Ost48;Pis;CG7881;Sec61alpha;CG7830;CG33303;Cyp9b2;Atpal  
Tudor-SN;AGO2;r2d2;Dcr-2;Fmr1;Dcr-1;vig  
CG1444;Rab1;Ost48;CG12007;betaggt-II;Sac1;Pis;Sec61alpha;CG7830;C  
Eb1;mts;Vap-33-1;CG4854  
CG5885;Tapdelta;l(1)G0320;SsRbeta  
Rab1;CG8331;Gdi;Rab6;betaggt-II;CG1418;Rab5;Rab7  
CG1444;Kr-h2;Pp2A-29B;Ranbp9;Cnx99A;Sec61alpha;CG33303;Gp93;Gy  
blw;ATPsyn-beta;ATPsyn-gamma;Oscp;porin;l(1)G0230;ATPsyn-b  
Ost48;CG7691;CG5446;CG33253;blp;Sec61alpha;Karybeta3;ZnT63C;Kap  
Nurf-38;capt;CG9436;RnrS;Pka-R1;Hsc70Cb;RnrL;Inos;CG10638;Fim;Oat  
ColV;CG6455;tomboy20;l(2)37Cc;porin;l(2)03709  
Cka;CG7033;dpr5;T-cp1;Tcp-1eta;Cct5;CG6543;tws;Tap42;CG11534;CG8  
wds;Lis-1;Cka;CG7033;T-cp1;Tcp-1eta;Cct5;l(2)dtl;tws;Tap42;CG8258;Tc  
Pp2A-29B;Cka;CG34114;CG7033;Arr2;T-cp1;Tcp-1eta;Cct5;tws;Tap42;CC  
ERp60;CG18179;Ero1L;Pdi;CG9911;Chd64  
Pi3K68D;Cnx99A;Cctgamma;EfTuM;Gfat2;Aats-glupro;Gyk;Odc1;Mpcp;r;l  
PPP4R2r;viaf;Cctgamma;CG7033;CG2812;Tcp-1eta;CG5525;Tap42;Su(v  
Cctgamma;PpV;CG7033;Pbp95;CG2812;T-cp1;Tcp-1eta;CG5525;Hsp70A  
Pi3K68D;Cnx99A;CG7115;CG33303;EfTuM;Cyp9b2;Odc1;Mpcp;Aats-glup  
CG11697;Rab1;Gdi;betaggt-II;Rab6;Rab5;Rab7;KdelR;CG3711  
Dmn;14-3-3zeta;CG7911;Nlp;CG6652;CG9279;Gl;mod;14-3-3epsilon  
Act57B;capt;Arpc3B;Cortactin;Lasp;Sop2;Arp14D;cpb;p16-ARC;Arc-p20;c  
CG1444;Ost48;CG7881;Sec61alpha;CG7830;CG33303;CG6370;CG32557  
ColV;l(2)37Cc;porin;RhoGEF4

(A) entire Hippo-PPIN

Chc;Clc;Aldh;Gale;Hip1  
CG34172;ImpL3;RpLP0;CG3542;nonA  
AGO2;Fmr1;CG42797;Nup43;Dcr-1  
AGO2;r2d2;Dcr-2;RpL35A;RpL4  
Ost48;CG8408;Cand1;Pp2A-29B;Ranbp9;emb;Sec61alpha;Karybeta3;CG;  
Ost48;mib2;CG3164;CG33253;ZnT63C;CG2064;Mec2;Tsp29Fb;CG6370;C  
CycK;RpL27;RpL17;RpL26;RpL11;RpL7A;RpS6;RpL27A;RpL21;RpL14;Rp  
viaf;Cctgamma;CG7033;CG2812;Tcp-1eta;Hsc70-4;Cct5;Hdac3;Acp36DE  
Rheb;Rab6;Mcr;betaggt-II;Rab5;LRP1;Rab7  
CG7185;CG18179;l(2)37Bb;CG3689;CG42724;CG31235  
CG5210;O-fut2;PH4alphaEFB;CG11060;Pdi;14-3-3epsilon  
yip2;CG6543;CG4389;CG16935;Thiolase;CG10131  
Act79B;Act42A;capt;Act5C;Pid;Ald  
14-3-3zeta;lkb1;CG1105;alc;SNF4Agamma;14-3-3epsilon  
CG7185;CG10082;CG18179;CG2199;CG3689;mRpL51  
CG8036;CG5432;CG5103;Ald;CG30410;fbp  
Spt5;barc;Cdk9;RpL1215;mod  
Sec61alpha;CG33303;RpS10b;Mpcp;colt;Gp93;Cyp12d1-p;CG6370;Tapde  
Bap;AP-50;AP-47;AP-1gamma;AP-1sigma  
CG7813;Oscp;ATPsyn-d;ATPsyn-gamma  
cindr;Rala;sec5;exo84;exo70;alpha-Spec;beta-Spec  
Cnx99A;CG33303;CG30194;Gfat2;Mpcp;Aats-glupro;Odc1;Cyp12d1-p;CG  
Ost48;CG7691;CG31729;fwe;CG5446;CG33253;ZnT63C;CG2064;Mec2;T  
Pp2A-29B;emb;Rpn2;Rpn1;Pros45;Tbp-1;Aats-asn;Rpt1;Gp93;Aats-glupro  
CG7580;CG6455;ox;RFeSP;CG4169;CG4769  
CG1444;Ost48;Sac1;CG4729;Pis;Sec61alpha;CG33303;Cyp9b2;CG6370;  
CG11697;Rab1;Rab2;Rab10;CG33303;CG12404;Rab6;CG5484;frc;Rab5;l  
ck;jar;ninaC;Mlc-c;zip;sqh  
epsilonCOP;Sac1;Arf79F;Vap-33-1;CG11306;CG17287  
CG1444;Ost48;CG10425;CG7881;Sec61alpha;CG7830;CG33303;ZnT63C  
CG1444;Ost48;Suchb;Sac1;skap;Pis;CG7881;CG33303;Cyp9b2;Droj2;CG6  
Rbsn-5;Rab2;Vps45;Rab5;CG5446;Rab7;Rab4  
CG10103;shrb;Vps4;vps24;CHMP2B;vps2;CG6259;Chmp1;CG7967;Vps2  
Ost48;CG7691;Kr-h2;Pp2A-29B;Ranbp9;Sec61alpha;CG33303;heix;Mpcp;  
Pi3K68D;Cnx99A;TER94;CG33303;Gfat2;Mpcp;Aats-glupro;Gyk;Gp93;Cyl  
mRpS11;RpS19b;RpL31;RpL27;RpL17;RpL26;RpL11;RpS15;RpL27A;His2  
skapA;CG7407;CG14222;slmb;skpC;Hsp23  
shi;Dap160;Cip4;term;TSG101;WASp  
gho;sar1;sec24;sec23;sec31;sec13  
Pp2A-29B;Spindly;Ranbp9;sec63;tra2;CG2064;Mpcp;Aats-glupro;Cyp12d1  
CG1444;Ost48;CG8195;CG31729;Kr-h2;Sec61alpha;Mec2;CG6370;Tapde  
CG9318;l(2)06225;sun;Oscp;Trap1;ATPsyn-beta;ATPsyn-gamma;Rtnl1;AT  
Vps4;Pp2A-29B;Ranbp9;Cnx99A;Sec61alpha;CG33303;Odc1;Gyk;Aats-gli  
GM130;Rab1;Es2;Rab2;p115;Grasp65  
CG7650;Cctgamma;CG7033;CG2812;Hsp68;Tcp-1eta;Gbeta13F;CG5525  
Kap-alpha3;ran;Pen;Ntf-2;CG14712;Karybeta3;Nup153;Nup50  
Kap-alpha3;ran;Cas;Pen;emb;dap;Nup153;Nup50  
CG1444;Ost48;CG6439;Pis;Sec61alpha;CG33303;CG2064;CG6370;CG31  
CG1444;Ost48;CG31729;Kr-h2;Sec61alpha;CG33303;ZnT63C;Atpalpha;C  
CG1444;Ost48;Sac1;Pis;Sec61alpha;CG33303;LBR;Atpalpha;CG6370;Sc;  
CG34172;CG6459;CG11148;U2af50;CG10909

(A) entire Hippo-PPIN

Bx42;CG15634;CG6905;Tango4;CG32528;CG7033;Ilk;T-cp1;Tcp-1eta;Ccl  
Rga;Not1;CG10188;CklIalpha;Lap1;l(2)NC136  
beta'Cop;CG7878;alphaCop;CG8043  
CG1444;Ost48;slif;CHOp24;Sec61alpha;CG33303;CG6370;Sc2;Surf4;CG:  
14-3-3zeta;14-3-3epsilon;Hsp70Ab;phl;Aldh;ksr;Dsor1;Hsp60;cnk  
CG8311;CG7185;CG18179;CG3689;CG42724;nonA-I;CG31235  
par-1;14-3-3zeta;Dak1;HDAC4;foxo;gig;14-3-3epsilon  
par-1;14-3-3zeta;CG5783;CG5065;HDAC4;foxo;14-3-3epsilon  
Cbl;cindr;Crk;Pi3K21B;p130CAS;Sos;drk  
glo;Hrb87F;PGRP-LB;Hrb98DE  
Act57B;capt;Cortactin;c(3)G;RnrL;Sop2;Arp14D;Inos;cpb;p16-ARC;Fim;W.  
Pen;CG30447;Nup153;Nup50  
Bx42;CG6905;eIF-2alpha;eIF5;Dp1;eIF-2beta;NAT1  
His2B;CG33886;CG12171;l(2)37Cc;CG14762;l(2)03709  
CG11697;Rab1;Klp68D;betaggt-II;Rab4;Ubi-p63E;Rab6;Rab5;Rab7;CG37  
Cpsf100;Spargel;Cdk9;CycT;RplI215;mod  
blw;ImpL3;CG4692;sun;Oscp;CG14717;CG4797;Tsp29Fb;ATPsyn-beta;Ct  
Crc;Nufip;CG16817;CG6776;eEF1delta;capt;Hop;Chd64;Nacalpa;Akap2C  
Aos1;Uba2;CG9399;pnut;smt3;Sep2;lwr  
gw;Rb97D;ZAP3;CG10777;nocte  
CG1444;Ost48;CG9053;p24-1;Sac1;Pis;CHOp24;Sec61alpha;CG33303;C  
Act88F;flil;CG6873;capt;tsr;chic;Act87E  
Rsf1;skpA;Syt1;slmb;lin19;Rca1;skpB  
arm;skpA;slmb;skpC;Axn;sgg;CG2765  
Hakai;nito;Bj1;CG11107  
Ost48;CG9053;p24-1;Pis;Irc;CG33303;CG6370;bai;p24-2  
CklIalpha;dco;Bap;thoc7;CG6227;CG1603  
SPoCk;rump;l(2)37Cc;betaTub85D;CG3509;alphaTub84D;l(2)03709  
eIF4G;Srp9;CG8034;eIF4E-5;eIF-4a;NAT1  
CadN;ft;CG5921;ds  
Cp1;Pi3K68D;Cnx99A;CG33303;Gfat2;Mpcp;Aats-glupro;Gyk;Odc1;Cyp12  
CG16817;RplP0;Pi3K68D;CG11876;CG11407;CG13630;Nacalpa  
Ost48;CG7601;CG31729;Pis;CG33253;Sec61alpha;Tango9;ZnT63C;Mec2  
Reps;Past1;Sop2;drk;hpo;CG4612;Cpn;Nak;CG9297;Hip1  
Ost48;CG7691;CG31729;Cand1;Kr-h2;CG5446;ZnT63C;CG2064;CG9662  
Act57B;didum;Cam;Mlc-c;zip;Cyp1;awd;CG14715  
zetaCOP;beta'Cop;gammaCop;deltaCOP;epsilonCOP;Arf79F;betaCop;alp  
CklIbeta2;Ef1beta;CG16817;eEF1delta;Ef1alpha100E;Ef1gamma  
CG15220;CG3689;grp;Su(var)2-10;Rrp40  
mRpS11;CstF-50;Rpl27;Rpl17;Rpl11;Rpl21;Rps3A;Rpl27A;Rps5a;Rpl  
msk;Ranbp9;Sec61alpha;sec63;CG33303;Aats-glupro;Gyk;Cyp9b2;Mpcp;  
Rpl23A;Rpl31;Rpl27;CG2246;Rpl18A;Rpl30;Rpl11;Rpl21;Rpl14;RplF  
snf;SmG;SmD1;SmD3;SmE;SmF;snRNP-U1-70K;SmD2;snRNP-U1-C;Sm  
Aats-glupro;Aats-lys;CG15100;Aats-arg;Aats-gln;Aats-asp;Aats-ile  
hth;cdc2c;Hrs;Pkc98E;Stam;Plap

(A) entire Hippo-PPIN

**Members\_SAIN\_T\_Score**

1.00;1.00;1.00;1.00;1.00  
0.16;1.00;1.00  
1.00;NA;1.00  
1.00;1.00;NA  
0.99;0.99;0.60  
0.99;1.00;NA  
0.99;NA;1.00  
0.99;1.00;NA  
1.00;0.99;NA;0.98  
1.00;NA;0.98;0.97;1.00;1.00;1.00;0.91;NA  
1.00;0.96;NA  
0.88;0.99;0.97;0.90  
0.73;0.79;0.99;0.00;0.98;0.88  
0.67;0.65;0.86;0.79;0.99  
NA;0.77;0.91  
0.48;0.77;0.91  
1.00;0.98;0.97;1.00;0.55;NA;1.00;NA;0.91;NA  
1.00;NA;1.00;1.00;0.00;0.91  
0.88;0.57;1.00;NA  
0.90;1.00;0.64;0.53;0.54;0.69;0.91;0.57  
1.00;NA;1.00;NA;0.98;0.79  
1.00;0.47;0.56;0.37;0.99  
1.00;0.55;0.98;0.24;NA;0.92  
0.99;0.67;NA  
NA;0.90;1.00;0.64;0.53;0.54;0.69;0.57;0.91  
NA;1.00;NA;1.00;1.00  
0.47;0.56;0.96;NA;0.99  
NA;0.95;0.66  
1.00;NA;0.99;0.60;NA;1.00  
0.99;0.54;1.00;0.98;0.08;NA  
NA;0.90;1.00;0.15;0.79;0.08;0.73;0.91  
1.00;0.72;0.27;0.41;NA;0.84;NA;0.99;0.94  
0.88;1.00;NA;NA;1.00  
1.00;0.27;0.84;0.38;0.99;NA  
NA;0.97;0.00;0.57;0.91;1.00  
0.02;0.60;0.82  
NA;0.99;0.60  
NA;0.99;0.60  
1.00;0.55;0.98;0.84;NA;NA  
0.99;1.00;NA;0.96;0.98;NA;NA  
0.45;0.27;NA;0.56;0.39;0.74;0.79;0.90;0.53;0.67;0.03;0.36;0.73;0.84;(C  
0.00;0.34;1.00;0.82  
0.06;0.99;0.38;0.00;1.00;0.88  
0.56;0.69;0.15;0.91;0.57;0.08;0.92  
NA;0.57;0.61  
1.00;0.55;0.00  
NA;0.00;0.99;1.00;0.57;0.61  
0.45;NA;0.72;0.27;NA;0.77;1.00;0.84;NA;0.41;0.73;0.84;0.46;0.94;0.2  
0.79;0.00;0.79;0.90;0.03;0.73;0.00;0.00;0.99;0.91  
0.53;0.47;0.39;0.74;NA;0.99

(A) entire Hippo-PPIN

NA;1.00;0.53;0.64;0.54;1.00;NA;NA;0.57;0.91  
0.91;1.00;NA;0.15  
0.45;0.72;0.27;NA;NA;0.39;0.77;0.53;1.00;0.41;0.73;0.84;0.46;0.94;0.  
1.00;0.00;0.55;1.00;NA  
0.45;0.72;0.79;0.00;0.27;0.39;0.79;0.77;0.53;1.00;NA;0.73;0.46;0.21;f  
0.45;0.79;0.27;NA;0.79;0.77;1.00;0.13;0.00;0.84;NA;0.99;0.46;NA;0.9  
NA;1.00;NA;1.00  
1.00;NA;1.00;1.00;NA;NA  
0.86;NA;0.43;0.57  
NA;1.00;NA;1.00  
NA;0.56;0.74;0.79;0.90;NA;0.79;0.08;0.53;0.67;0.36;0.03;0.73;NA;0.9  
1.00;0.99;0.00;NA  
0.99;1.00;NA;NA;0.98;NA  
NA;0.99;1.00;NA;0.98;NA  
0.45;0.72;0.79;0.27;0.67;0.39;0.77;0.53;0.73;0.99;0.00;0.46;0.00;NA;(C  
0.72;0.27;NA;0.77;0.79;1.00;0.53;0.41;0.73;0.84;0.00;0.94;0.00;0.21;(C  
NA;0.78;0.49  
NA;0.90;1.00;0.64;0.08;0.54;0.69;NA;0.57;0.91;NA  
0.67;NA;NA;0.77;0.91  
1.00;NA;NA;NA;0.90;0.99  
0.75;NA;0.72;NA;0.41;0.84;0.94;NA  
1.00;NA;NA;0.98;0.36;1.00;1.00;NA;NA  
0.56;0.00;0.74;NA;0.77;1.00;0.53;0.67;0.38;0.36;0.88;0.65;0.00;NA;0.  
NA;NA;0.95;0.92  
NA;1.00;0.64;0.53;0.54;0.69;NA;NA;0.57  
0.96;1.00;0.53;0.64;0.54;NA;NA;NA;NA;0.57;0.91  
1.00;1.00;0.53;0.64;0.54;NA;NA;NA;0.57;NA;0.91  
0.45;NA;0.72;0.27;0.00;0.77;0.79;1.00;NA;0.41;NA;0.84;0.46;0.94;0.2  
NA;0.90;1.00;0.15;0.00;0.08;0.73;0.40;0.91  
0.72;0.00;0.41;0.99;0.46;0.21  
1.00;NA;0.80;NA;0.00;0.99  
0.45;0.86;NA;0.56;NA;NA;0.74;0.77;0.67;NA;0.03;0.53;0.88;0.36;0.65  
0.45;0.72;0.27;NA;0.56;0.74;0.77;0.03;0.67;0.53;0.73;NA;NA;0.99;0.0  
0.00;NA;1.00;0.88  
NA;0.00;1.00;0.88  
0.88;0.98;NA;NA  
NA;0.86;0.65;NA;0.75;0.00;0.77  
NA;NA;0.90;1.00;0.91;NA;0.53;0.64;0.54;0.69;NA;NA;0.57;0.91;NA  
0.00;NA;NA;0.90;1.00;NA;0.53;0.64;0.54;0.94;0.69;NA;NA;0.57;0.91  
1.00;0.45;0.98;0.39;0.80;0.77;NA;0.53;0.36;1.00;0.00;0.00;NA;0.57;N  
1.00;NA;NA;1.00;0.71;0.00  
0.00;0.00;0.51;0.02;0.90;0.79;1.00;NA;0.88;0.36;0.00;0.91  
0.00;NA;0.64;0.38;0.88;0.65;0.26;0.00;0.57;0.91  
0.48;NA;NA;0.77;0.91  
0.62;0.00;0.41  
NA;0.64;0.41  
1.00;0.00;0.86;NA;0.00;0.80;0.00;0.00;NA;1.00;0.45;1.00;0.65;0.84;0.  
1.00;NA;NA;1.00;0.00;1.00;NA  
NA;1.00;NA;1.00;1.00;NA;NA  
0.40;0.81;NA  
0.56;0.51;0.74;0.02;NA;0.90;0.19;1.00;NA;0.38;0.88;0.36;0.00;0.26;0.

(A) entire Hippo-PPIN

1.00;NA;NA;NA;0.99;0.59  
0.98;NA;0.79;NA  
0.45;0.86;NA;0.00;NA;0.77;0.53;0.67;0.45;0.65;0.84;NA;NA;NA;0.99  
NA;0.13;1.00;0.50;0.54  
0.78;NA;0.99;NA  
1.00;0.00;0.55;1.00;NA;0.00  
NA;0.77;0.91;NA  
1.00;0.55;0.98;NA;NA;NA  
1.00;0.55;NA;0.98;NA;NA  
0.60;NA;0.16;0.71  
0.60;NA;0.16;0.71  
0.21;0.55;0.84;NA  
NA;0.41;0.38  
0.45;NA;0.79;NA;0.77;NA;0.88;0.53;1.00;0.13;0.00;0.73;0.99;0.00;0.0  
NA;0.88;NA;0.54;0.25;0.72  
NA;0.00;0.00;1.00;1.00;0.50  
0.84;0.00;0.74;NA  
0.28;0.80;NA;0.46  
0.00;0.74;NA;1.00  
0.72;0.79;0.27;0.00;1.00;0.53;0.13;0.73;0.14;0.84;0.00;0.00;0.00;0.00  
0.56;0.74;NA;NA;0.00;0.90;0.64;NA;0.53;0.03;0.69;0.26;0.57;0.91;NA  
0.96;NA;0.96;0.55;NA;0.67;0.96;NA;NA;NA  
NA;0.90;0.00;1.00;NA;0.53;0.08;0.64;0.00;0.69;0.73;NA;NA;0.57;0.91  
NA;0.72;NA;0.67;0.41;NA;0.84;0.94;NA  
0.67;0.36;0.41;NA;0.84;NA  
0.36;1.00;NA  
0.45;0.86;NA;0.57;0.77;1.00;0.53;NA;0.84;NA;0.99;0.00;0.00;NA;0.00  
0.45;0.86;0.27;NA;0.57;0.77;1.00;0.53;0.13;0.43;0.84;NA;0.00;NA;0.0  
0.00;0.51;0.91;1.00;NA;0.88;0.36;0.00;0.00  
NA;NA;0.21;0.97;0.72;0.82;NA  
0.27;0.23;0.80;0.00;NA;0.00;1.00;NA;0.00;0.79;NA;0.00;0.51;0.72;0.0  
0.45;0.72;0.27;NA;NA;0.00;0.77;0.53;NA;0.41;0.73;0.84;0.94;0.00;0.0  
1.00;0.00;0.75;NA;0.02;0.90;0.19;0.79;0.36;0.38;NA;0.04;0.00;0.57;0.  
0.38;0.88;0.51;0.26;NA;0.00;0.57  
NA;0.72;0.27;NA;0.79;0.41;NA;0.84;0.21;0.94;NA  
0.45;0.86;0.00;0.00;NA;0.77;0.53;0.67;0.65;0.84;NA;0.84;NA;0.00;0.0  
0.77;NA;NA;NA;0.93;0.97;NA  
0.88;1.00;0.13;NA;NA  
1.00;0.55;0.00;NA;0.46  
1.00;0.79;0.55;NA;NA;NA  
1.00;NA;NA;0.35;0.99;0.00  
NA;1.00;0.67;NA  
NA;1.00;0.20;1.00;NA;0.00;1.00;0.00;NA;0.32;0.70;0.00;0.78;0.00;1.0  
1.00;NA;0.00;0.00;1.00  
1.00;NA;0.00;NA;1.00  
1.00;NA;1.00;0.00;NA  
1.00;1.00;NA;NA;NA  
NA;NA;0.90;1.00;NA;0.53;0.64;0.00;NA;0.54;NA;0.69;NA;0.57;0.91  
NA;NA;0.90;1.00;NA;0.53;0.64;0.54;0.69;NA;NA;0.00;0.57;NA;0.91  
NA;NA;NA;0.00;0.90;1.00;0.53;0.64;NA;0.00;0.54;0.69;NA;0.57;0.91  
NA;NA;0.00;1.00;0.99

(A) entire Hippo-PPIN

0.09;0.57;NA;0.61  
0.83;NA;0.00;NA;1.00;0.53;0.64;0.54;NA;NA;0.57;NA;0.91  
NA;1.00;0.53;0.64;0.00;NA;0.54;NA;NA;0.57;0.91  
0.99;0.96;0.54;0.12;0.00;NA;0.00  
1.00;NA;0.98;0.00;0.39;0.80;0.77;NA;NA;0.36;0.00;NA;0.00;0.57;0.91  
0.99;NA;0.96;NA;NA  
0.96;1.00;0.00;NA;NA  
NA;0.42;0.32  
0.13;NA;0.51;0.92  
0.93;0.21;0.32  
0.45;0.86;NA;0.23;NA;0.00;0.75;0.77;0.65;0.84;0.00;NA;NA;0.99;0.00  
NA;0.97;0.00;1.00;0.00;NA;1.00;NA;0.91;NA  
NA;0.56;0.74;0.35;0.03  
NA;NA;NA;0.90;1.00;NA;0.64;0.69;NA;NA;NA;NA;0.57;0.91;1.00  
0.62;NA;NA;0.99  
NA;1.00;0.31  
1.00;0.00;0.31  
NA;NA;0.00;0.92;1.00  
1.00;NA;0.55;0.98;0.00;NA;0.00  
1.00;0.45;0.86;0.00;0.00;0.77;NA;NA;1.00;0.65;0.84;NA;0.00;NA;NA  
0.51;0.56;0.10;0.52;0.00;0.64;0.00;0.05;0.67;0.79;0.45;0.00;0.00;0.50  
0.39;0.02;0.90;0.15;0.00;0.79;0.00;0.08;NA;0.69;0.73;0.06;0.57;0.91;f  
0.60;NA;NA;NA;0.71;0.59  
0.60;NA;NA;NA;0.71;0.59  
NA;NA;0.59;0.75  
0.96;0.97;NA;NA;0.91;0.75;0.59;NA;0.00;NA;0.72;NA;NA  
0.45;0.86;0.00;0.00;0.75;0.77;0.79;0.65;0.84;NA;0.00;NA;NA;0.00;0.0  
0.45;0.86;NA;NA;0.00;0.75;0.77;NA;1.00;0.65;0.84;NA;0.00;NA;NA  
NA;0.77;NA;NA;0.93;NA;0.67  
0.45;0.72;0.86;NA;NA;NA;NA;0.00;0.75;0.77;0.65;0.84;0.00;NA;NA  
0.57;NA;0.92;0.00  
0.43;0.13;0.14;0.46  
0.72;NA;NA;0.41;NA;NA;0.84;0.94  
0.45;NA;0.00;0.80;NA;0.00;0.77;0.67;NA;0.53;0.88;0.45;0.00;0.42;NA  
0.22;0.43;0.78;0.49;0.00;0.00;0.26  
0.86;NA;NA;0.57;NA;0.00;0.00;NA;0.45;1.00;1.00;NA;0.65;0.84;0.00  
NA;1.00;0.00;0.94;NA;0.00;0.00;1.00;NA;1.00;0.00  
0.53;NA;NA;0.57;0.00;0.61  
NA;1.00;NA;0.53;0.64;0.54;0.00;NA;NA;NA;0.57;0.91  
NA;NA;NA;1.00;0.53;0.64;0.54;NA;NA;NA;0.57;0.91  
0.00;NA;NA;1.00;NA;0.53;0.64;0.54;NA;NA;0.57;0.91  
0.96;NA;0.00;NA;1.00;0.13  
0.00;NA;0.90;1.00;0.36;0.38;NA;NA;0.88;0.00;NA;0.26;0.00;0.57;0.92  
NA;NA;0.90;1.00;NA;0.64;0.69;NA;NA;NA;NA;0.57;0.91  
0.90;NA;1.00;NA;NA;0.53;0.64;0.69;NA;NA;NA;NA;0.57;0.91;NA  
0.00;NA;NA;0.77;1.00;NA;NA;0.88;0.38;0.36;0.65;0.00;NA;0.26;0.92  
NA;0.72;NA;NA;0.41;0.84;0.94;0.21;NA  
NA;1.00;NA;0.59;NA;0.00;NA;0.75;1.00  
0.00;1.00;NA;0.97;0.90;0.00;0.00;0.10;0.01;0.00;1.00;0.91;0.00;(C  
0.45;0.86;NA;0.00;0.75;0.77;0.65;NA;0.84;0.00;NA;NA;NA;0.27  
0.53;0.57;0.00;NA

(A) entire Hippo-PPIN

1.00;0.55;0.00;0.24;NA  
NA;0.79;0.00;NA;0.82  
0.77;0.93;NA;NA;NA  
0.77;NA;NA;NA;0.93  
0.86;NA;0.28;0.00;0.80;NA;0.00;0.00;0.79;0.65;0.84;0.00;NA;0.57;NA  
0.86;NA;0.00;0.57;NA;0.79;1.00;NA;0.65;0.84;NA;0.00;0.27;0.00;NA  
NA;0.52;0.64;0.00;0.05;0.20;0.59;0.79;0.45;0.00;0.00;0.50;0.30;0.00;(C  
NA;0.90;1.00;NA;0.64;0.00;0.54;NA;NA;0.00;0.57;NA;0.91  
NA;0.41;NA;NA;0.84;NA;0.94  
1.00;NA;NA;1.00;0.00;NA  
NA;NA;1.00;NA;NA;1.00  
NA;0.00;1.00;NA;1.00;NA  
NA;0.00;1.00;0.00;NA;1.00  
1.00;NA;NA;NA;NA;1.00  
1.00;0.00;NA;NA;1.00;NA  
1.00;NA;NA;1.00;NA;NA  
0.00;NA;0.00;0.98;0.75  
0.00;0.77;0.01;0.88;NA;0.67;0.00;0.65;0.13;0.84;0.00;NA;NA;NA;0.92  
1.00;0.74;0.00;NA;NA  
NA;0.49;0.00;0.78  
1.00;NA;NA;NA;NA;1.00;0.21  
NA;0.77;NA;0.36;0.88;0.38;NA;0.00;0.65;NA;NA;NA;0.00;0.99;0.91  
0.86;NA;NA;NA;NA;0.57;NA;0.79;1.00;NA;0.84;0.00;0.27;0.51;0.00  
0.00;NA;0.47;0.02;0.15;0.00;0.79;0.08;0.67;0.38;0.36;NA;0.73;NA;0.9  
0.00;NA;0.00;0.00;0.99;0.94  
0.45;0.86;NA;0.23;NA;0.00;0.77;NA;0.65;0.84;0.00;NA;NA;0.99;NA  
NA;0.72;0.27;NA;0.77;0.00;0.41;NA;NA;0.84;0.94;NA  
0.92;0.99;NA;0.00;0.00;0.01  
NA;NA;0.99;0.92;NA;NA  
0.45;0.86;0.00;NA;0.00;0.75;0.77;NA;0.65;0.84;0.00;0.00;NA;NA;0.21  
0.45;0.86;0.56;NA;0.74;NA;NA;0.77;NA;0.03;0.65;0.00;NA;NA;0.35  
NA;0.27;NA;0.84;NA;0.94;NA  
0.96;0.99;0.67;NA;0.12;0.00;0.54;0.00;NA;NA  
0.86;NA;NA;0.00;0.80;0.00;0.77;0.00;0.88;0.00;0.65;NA;NA;0.00;0.57  
0.00;NA;1.00;0.77;0.36;0.88;0.38;NA;0.67;0.00;0.00;0.00;NA;NA;0.57  
NA;0.74;0.10;0.52;0.64;0.00;0.05;0.67;0.79;NA;0.00;0.00;0.00;0.50;0.  
0.88;NA;NA;1.00;NA;0.00  
0.88;1.00;NA;NA;NA;NA  
0.00;NA;0.00;0.00;1.00;0.88  
0.00;NA;0.80;NA;NA;0.79;0.88;0.38;0.00;0.84;0.00;NA;NA;NA;0.92  
0.45;0.86;NA;NA;NA;0.00;1.00;0.65;0.13;0.43;0.84;0.00;0.00;0.27;NA  
0.00;0.00;0.00;0.49;0.00;0.43;0.78;0.38;0.26  
0.67;0.00;0.80;NA;0.00;0.77;NA;NA;0.38;0.45;0.88;0.00;0.42;0.00;NA  
NA;0.72;NA;0.27;NA;0.58  
NA;0.90;1.00;NA;0.00;0.64;0.00;0.69;NA;NA;NA;NA;0.57;NA;0.91  
0.45;0.99;0.15;NA;0.00;0.00;0.24;0.98  
0.45;0.99;NA;0.15;NA;NA;0.24;0.98  
0.45;0.86;NA;NA;0.00;0.77;0.79;0.65;0.00;0.84;NA;0.00;NA;NA;0.00  
0.45;0.86;NA;NA;0.00;0.77;NA;1.00;0.65;0.84;NA;0.00;0.00;NA;NA  
0.45;0.86;NA;NA;0.00;0.77;NA;1.00;0.65;0.84;NA;0.00;NA;NA;NA  
NA;0.66;NA;0.62;NA



(A) entire Hippo-PPIN

NA;NA;NA;NA;NA;1.00;0.00;0.53;0.64;0.54;NA;NA;0.57;0.91  
NA;NA;NA;0.12;0.76;0.70  
0.62;0.00;0.41;NA  
0.45;0.86;NA;NA;0.00;0.77;0.65;0.84;0.00;NA;NA;NA;0.51;0.00  
1.00;1.00;NA;NA;0.00;NA;NA;1.00;NA  
NA;1.00;NA;1.00;0.00;NA;NA  
0.00;1.00;NA;NA;NA;NA;1.00  
0.00;1.00;NA;NA;NA;NA;1.00  
NA;1.00;NA;NA;NA;NA;1.00  
0.59;0.02;NA;0.38  
0.00;1.00;0.97;NA;0.00;0.00;0.00;1.00;0.00;0.10;1.00;NA;0.00;0.49  
0.15;NA;0.24;0.98  
NA;NA;0.41;NA;1.00;0.00;0.55  
NA;NA;0.57;NA;0.61  
NA;0.72;0.00;NA;NA;NA;0.41;0.84;0.94;NA  
NA;NA;0.00;0.00;0.98;0.75  
0.22;0.79;NA;0.00;0.49;NA;NA;NA;0.43;0.40;0.00;0.78;0.26  
0.00;NA;1.00;NA;0.20;1.00;0.00;0.13;0.32;0.00;0.00;1.00;0.00;1.00;NA  
NA;NA;NA;0.91;NA;1.00;NA  
NA;NA;0.54;0.72;0.00  
0.45;0.86;0.00;NA;NA;NA;NA;0.00;0.77;0.65;NA;0.84;0.00;NA;0.51  
0.28;0.00;NA;1.00;0.10;0.50;NA  
NA;0.88;NA;1.00;NA;0.00;NA  
NA;0.88;1.00;NA;0.00;NA;NA  
NA;0.35;0.96;NA  
0.86;0.00;NA;NA;NA;0.77;0.65;NA;0.22  
0.38;0.31;1.00;0.00;NA;NA  
NA;0.28;0.57;NA;NA;NA;0.61  
0.97;NA;0.00;NA;0.13;0.55  
0.00;0.34;NA;0.82  
0.96;0.00;NA;0.77;0.36;0.88;0.38;NA;NA;0.00;0.00;NA;NA;NA;0.92  
1.00;0.00;0.00;0.51;NA;NA;0.32  
0.86;0.00;NA;NA;0.57;0.00;NA;NA;1.00;NA;0.65;0.84;NA;0.00;0.27  
NA;0.98;0.00;1.00;1.00;NA;NA;NA;NA;NA  
0.86;NA;NA;0.28;NA;NA;NA;0.79;NA;0.65;0.84;0.00;0.51;0.00;0.00  
0.00;1.00;1.00;0.00;0.00;0.64;NA;NA  
NA;0.62;0.00;0.04;NA;0.99;0.19;0.41  
NA;0.44;1.00;0.20;NA;0.00  
0.48;1.00;NA;NA;NA  
NA;NA;0.52;0.64;0.05;0.45;0.56;0.79;NA;0.00;0.00;0.00;0.01;0.10;0.2  
0.00;0.80;0.00;NA;0.77;0.38;NA;NA;0.88;0.36;0.65;0.00;0.00;NA;NA  
0.51;0.10;0.52;NA;0.00;0.06;0.05;0.45;0.00;0.00;0.00;0.50;0.30;0.26;0  
0.21;NA;0.00;0.37;0.16;NA;0.00;0.18;0.39;0.54  
0.38;1.00;0.18;NA;NA;0.19;NA  
NA;NA;0.99;NA;0.60;NA

## (A) entire Hippo-PPIN

### Name

R8 cell differentiation;R8 cell fate commitment;compound eye photoreceptor fate commitment;photoreceptor cell fate commitment

AP2 adaptor complex

HSF1-YWHAE complex

positive regulation of transcription, DNA-dependent;regulation of RNA biosynthetic process;regulation of transcription

Protein-sorting complex (Stam2, Hgs, Eps15);Protein-sorting complex (Stam1, Hgs, Eps15)

spermatid development;organelle transport along microtubule;mitochondrion transport along microtubule;sperm motility

myosin VI complex

RANBP1-RAN-KPNB1 complex

negative regulation of signal transduction;negative regulation of Notch signaling pathway;synaptic vesicle endocytosis

compound eye development;regulation of cell communication;cytoskeleton organization;organ morphogenesis;eye development

Unknown

sperm individualization complex

transmembrane receptor protein serine/threonine kinase signaling pathway;nucleocytoplasmic transport;nuclear import

cellular protein metabolic process;cellular macromolecule metabolic process;macromolecule metabolic process

DNA replication factor A complex

DNA replication factor A complex;RPA complex;RP-A

compound eye development;cytoskeleton organization;organ morphogenesis;eye development;sensory organ development

compound eye development;organ morphogenesis;eye development;morphogenesis of an epithelium;sensory organ development

Unknown

CCT complex (chaperonin containing TCP1 complex);CCT complex (chaperonin containing TCP1 complex), testis-specific

CPSF6-ITCH-NUDT21-POLR2A-UBAP2L complex

cellular catabolic process

synaptic vesicle budding;synaptic vesicle endocytosis;synaptic vesicle budding from presynaptic membrane;spermatid development

negative regulation of growth of symbiont involved in interaction with host;modulation of growth of symbiont involved in interaction with host

mitotic spindle organization;spindle organization;microtubule cytoskeleton organization;cytoplasmic microtubule organization

compound eye development;eye photoreceptor cell differentiation;compound eye photoreceptor cell differentiation

salivary gland morphogenesis;histolysis;salivary gland histolysis;salivary gland cell autophagic cell death;gland morphogenesis

mitotic spindle organization;centrosome organization;centrosome cycle;centrosome duplication;microtubule organization

establishment of protein localization;regulation of signal transduction;regulation of epidermal growth factor receptor signaling pathway

intracellular protein transport;nuclear transport;nucleocytoplasmic transport;protein transport;intracellular transport

cell cycle phase;cellular protein metabolic process;cellular macromolecule metabolic process;protein metabolic process

secretion by cell;membrane invagination;endocytosis;protein transport;small GTPase mediated signal transduction

regulation of signal transduction;regulation of cellular process;regulation of cellular component organization;regulation of cell cycle

endocytosis;synaptic vesicle transport;protein transport;small GTPase mediated signal transduction;synaptic vesicle transport

regulation of cell shape;embryonic development via the syncytial blastoderm;actin filament organization;ovarian follicle development

RNA splicing, via transesterification reactions with bulged adenosine as nucleophile;RNA splicing, via transesterification reactions with bulged adenosine as nucleophile

RIN1-STAM2-HRS complex

Hse1p/Vps27p complex

vesicle organization;endocytosis;synaptic vesicle transport;synaptic vesicle endocytosis;synaptic transmission

intracellular protein transport;nuclear transport;nucleocytoplasmic transport;protein transport;protein targeting

protein folding;mitotic spindle organization;spindle organization;small GTPase mediated signal transduction;M phase

Cdh23-Myo1c complex

regulation of cell morphogenesis;regulation of cell shape;chitin-based larval cuticle pattern formation;cuticle development

metabolic process

Unknown

synaptic vesicle budding;synaptic vesicle endocytosis;synaptic vesicle budding from presynaptic membrane;synaptic transmission

Unknown

signal transduction;protein transport;intracellular transport;small GTPase mediated signal transduction;intracellular transport

cellular metabolic process;metabolic process

Unknown

## (A) entire Hippo-PPIN

mitotic spindle organization;neurogenesis;spindle organization;cytoskeleton organization;microtubule cytoskeleton organization;positive regulation of programmed cell death;regulation of apoptotic process;positive regulation of establishment of protein localization;signal transduction;protein transport;small GTPase mediated signal transduction;synaptic vesicle budding;synaptic vesicle endocytosis;synaptic vesicle budding from presynaptic membrane;synaptic vesicle budding;small GTPase mediated signal transduction;macromolecule localization

cellular localization;small GTPase mediated signal transduction;macromolecule localization

BRAF-MAP2K1-MAP2K2-YWHAE complex;RAF1-MAP2K1-YWHAE complex

TEAD2-multiprotein complex

Unknown

BRAF-RAF1-14-3-3 complex

metabolic process

regulation of growth

intracellular protein transport;nuclear transport;nucleocytoplasmic transport;protein transport;intracellular transport;intracellular protein transport;nucleocytoplasmic transport;regulation of protein phosphorylation;regulation of kinase activity;regulation of protein phosphorylation;vesicle-mediated transport;protein localization;intracellular transport;small GTPase mediated signal transduction

establishment of protein localization;vesicle-mediated transport;protein transport;small GTPase mediated signal transduction

metabolic process

mitotic spindle organization;spindle organization;cytoskeleton organization;microtubule cytoskeleton organization;cellular metabolic process;cellular macromolecule metabolic process;macromolecule metabolic process;DNA replication;primary spermatocyte growth;transmembrane receptor protein tyrosine kinase signaling pathway;insulin receptor signaling pathway;secretion by cell;protein transport;small GTPase mediated signal transduction;synaptic transmission;intracellular transport;cellular biosynthetic process;cellular metabolic process;biosynthetic process;metabolic process

cell death;apoptotic process;programmed cell death;death

mitotic spindle organization;spindle organization;microtubule cytoskeleton organization;cytoplasmic microtubule organization;protein folding;mitotic spindle organization;spindle organization;microtubule cytoskeleton organization;M phase of cell cycle;mitotic spindle organization;spindle organization;microtubule cytoskeleton organization;cytoplasmic microtubule organization;neuron differentiation;protein transport;generation of neurons;small GTPase mediated signal transduction;intracellular transport;proteolysis;macromolecule catabolic process;protein metabolic process;catabolic process;protein catabolic process;secretion by cell;Golgi vesicle transport;small GTPase mediated signal transduction;synaptic transmission;intracellular transport;cellular respiration;oxidative phosphorylation;mitochondrial ATP synthesis coupled electron transport;ATP synthesis

metabolic process

cellular metabolic process

intracellular protein transport;chitin-based larval cuticle pattern formation;cuticle development involved in chitin-based larval cuticle pattern formation;cuticle development involved in protein-based cuticle molting cycle;chitin-based larval cuticle pattern formation;

Unknown

Oligosaccharyltransferase complex (Stt3A variant);Oligosaccharyltransferase;Oligosaccharyltransferase complex

protein folding;mitotic spindle organization;spindle organization;cytoskeleton organization;microtubule cytoskeleton organization;mitotic spindle organization;spindle organization;microtubule cytoskeleton organization;cytoplasmic microtubule organization

Unknown

nucleic acid phosphodiester bond hydrolysis;mRNA cleavage

microtubule-based process;mitotic cell cycle;cellular component organization or biogenesis at cellular level;microtubule-based process;mitotic spindle organization;spindle organization;cytoskeleton organization;microtubule cytoskeleton organization

RPA-MSH4-BLM complex

establishment of protein localization;intracellular protein transport;retrograde vesicle-mediated transport, Golgi transport

AIF-CYPA-DNA complex

establishment of protein localization;intracellular protein transport;protein transport;intracellular transport;cellular component organization or biogenesis at cellular level;nucleic acid phosphodiester bond hydrolysis;mRNA metabolic process;mRNA cleavage;mRNA processing;RNA processing

signal transduction;protein modification process;protein phosphorylation;phosphorylation;intracellular signal transduction

Unknown

cellular metabolic process;metabolic process

## (A) entire Hippo-PPIN

Unknown

transcription export complex

peptidyl-asparagine modification;very long-chain fatty acid metabolic process;protein N-linked glycosylation via regulation of nuclear mRNA splicing, via spliceosome;regulation of alternative nuclear mRNA splicing, via splice cellular catabolic process;cellular metabolic process

vesicle coating;synaptic vesicle endocytosis;synaptic vesicle budding from presynaptic membrane;synaptic vesicle 53BP1-containing complex

membrane organization;cellular membrane organization;membrane invagination;vesicle-mediated transport;end intracellular protein transport;membrane invagination;germ cell development;endocytosis;protein transport

protein localization to nucleus;protein targeting;nuclear import;protein import into nucleus;protein import

protein localization to nucleus;protein targeting;nuclear import;protein import into nucleus;protein import

cellular response to hydrogen peroxide;synaptic vesicle transport;synaptic vesicle endocytosis;regulation of apo

oocyte axis specification;compound eye photoreceptor development;compound eye photoreceptor cell differenti

generation of precursor metabolites and energy

Unknown

oocyte differentiation;oocyte axis specification;actin filament organization;oocyte development;oocyte constructi

Unknown

cellular process

Unknown

establishment of protein localization;protein localization;protein transport;small GTPase mediated signal transdu protein folding;cellular protein metabolic process;cellular metabolic process;cellular macromolecule metabolic pr

(ER)-localized multiprotein complex, Ig heavy chains associated

mitotic spindle organization;spindle organization;cytoskeleton organization;microtubule cytoskeleton organizati

signal transduction;vesicle-mediated transport;protein transport;small GTPase mediated signal transduction;intra

Unknown

Unknown

membrane organization;cellular membrane organization;endosome transport;protein ADP-ribosylation;small GTP protein localization;macromolecule localization

biosynthetic process

snRNP-free U1A (SF-A) complex

transport;cellular localization;establishment of localization;protein localization;macromolecule localization

establishment of protein localization;signal transduction;protein transport;small GTPase mediated signal transdu protein folding;mitotic spindle organization;spindle organization;microtubule cytoskeleton organization;M phase

tRNA metabolic process;tRNA aminoacylation;amino acid activation;cytoplasmic microtubule organization;tRNA

establishment of protein localization;vesicle-mediated transport;protein transport;small GTPase mediated signal

metabolic process

RNA interference;small RNA loading onto RISC;posttranscriptional gene silencing by RNA;production of siRNA i

Unknown

synaptic vesicle budding;synaptic vesicle endocytosis;synaptic vesicle budding from presynaptic membrane;syn synaptic vesicle budding;synaptic vesicle endocytosis;synaptic vesicle budding from presynaptic membrane;spe

tissue homeostasis;regulation of tube architecture, open tracheal system;anatomical structure homeostasis;multi

anatomical structure development;multicellular organismal development;neurogenesis;epithelium development;i

oocyte differentiation;oocyte axis specification;regulation of cellular component biogenesis;female gamete gene

negative regulation of response to stimulus;negative regulation of signal transduction;regulation of epidermal grc

PALS1-Par3-aPKC-14-3-3 zeta complex

regulation of imaginal disc growth;regulation of organ growth;regulation of developmental growth

compound eye development;eye morphogenesis;eye development;compound eye morphogenesis;actin cytoske

protein folding;mitotic spindle organization;spindle organization;microtubule cytoskeleton organization;M phase

protein folding;mitotic spindle organization;spindle organization;cytoskeleton organization;microtubule cytoskele

protein folding;mitotic spindle organization;spindle organization;microtubule cytoskeleton organization;M phase

Malonate semialdehyde pathway, propanoyl-CoA => Acetyl-CoA

## (A) entire Hippo-PPIN

macromolecule catabolic process;protein catabolic process  
mitotic spindle organization;neurogenesis;spindle organization;microtubule cytoskeleton organization;M phase  
protein folding;mitotic spindle organization;spindle organization;microtubule cytoskeleton organization;M phase  
establishment of protein localization;transport;establishment of localization;protein localization;protein transport  
cytoplasmic microtubule organization  
purine ribonucleotide catabolic process;purine nucleoside triphosphate catabolic process;purine ribonucleoside t  
Prolyl 4-hydroxylase (alpha(II)-type)  
nascent polypeptide-associated complex  
carboxylic acid metabolic process;cellular ketone metabolic process;organic acid metabolic process;oxoacid me  
Unknown  
peptidyl-asparagine modification;very long-chain fatty acid metabolic process;protein N-linked glycosylation via  
compound eye development;neuron differentiation;generation of neurons;eye morphogenesis;compound eye m  
Succinyl-CoA ligase  
mitotic spindle organization;spindle organization;microtubule cytoskeleton organization;cytoplasmic microtubule  
retrograde vesicle-mediated transport, Golgi to ER;Golgi vesicle transport;vesicle-mediated transport;regulation  
CALM1-FKBP38-BCL2 complex  
HSP90-FKBP38-CAM-Ca(2+) complex  
spermatid development;cellularization;sperm individualization;spermatid differentiation  
synaptic vesicle budding;synaptic vesicle endocytosis;synaptic vesicle budding from presynaptic membrane;spe  
regulation of tube length, open tracheal system;very long-chain fatty acid metabolic process;protein N-linked gly  
mitotic spindle organization;centrosome cycle;centrosome duplication;spindle elongation;mitotic spindle elongati  
cell cycle process;protein metabolic process;macromolecule metabolic process;primary metabolic process;orgar  
nuclear transport;nucleocytoplasmic transport  
transmembrane receptor protein serine/threonine kinase signaling pathway;protein targeting;nuclear import;prot  
SWAP complex  
DGCR8 multiprotein complex  
metabolic process  
cellular biosynthetic process;biosynthetic process;lipid metabolic process  
RNA-induced silencing complex  
glycoprotein metabolic process;protein glycosylation;glycoprotein biosynthetic process;macromolecule glycosyla  
cellular component assembly;organelle assembly;establishment or maintenance of cell polarity;spindle assembl  
Translocon-associated protein (TRAP) complex  
secretion by cell;protein transport;small GTPase mediated signal transduction;synaptic transmission;intracellular  
Unknown  
purine nucleoside triphosphate biosynthetic process;ATP metabolic process;purine ribonucleoside triphosphate t  
transport;establishment of localization  
activation of cysteine-type endopeptidase activity involved in apoptotic process;activation of cysteine-type endo  
mitochondrion organization;mitochondrial transport  
mitotic spindle organization;spindle organization;microtubule cytoskeleton organization;cytoplasmic microtubule  
mitotic spindle organization;neurogenesis;spindle organization;microtubule cytoskeleton organization;M phase  
protein folding;mitotic spindle organization;spindle organization;microtubule cytoskeleton organization;M phase  
protein folding;glycerol ether metabolic process;organic ether metabolic process;cellular homeostasis;cell redox  
cellular biosynthetic process;cellular metabolic process;biosynthetic process;primary metabolic process;metaboli  
protein folding;mitotic spindle organization;spindle organization;microtubule cytoskeleton organization;cytoplas  
mitotic spindle organization;spindle organization;microtubule cytoskeleton organization;cytoplasmic microtubule  
cellular biosynthetic process;cellular metabolic process;biosynthetic process;primary metabolic process;metaboli  
secretion by cell;protein transport;small GTPase mediated signal transduction;synaptic transmission;intracellular  
Lebercilin complex (Lca5, Ncl, Npm1, Ywhae, HSPA1A/B, Dctn1, Dctn2)  
regulation of actin polymerization or depolymerization;regulation of actin cytoskeleton organization;regulation of  
peptidyl-asparagine modification;very long-chain fatty acid metabolic process;protein N-linked glycosylation via  
Unknown

## (A) entire Hippo-PPIN

synaptic vesicle budding;synaptic vesicle endocytosis;synaptic vesicle budding from presynaptic membrane;syn  
Unknown

RNA interference;small RNA loading onto RISC;production of small RNA involved in gene silencing by RNA;pro  
heterochromatin organization involved in chromatin silencing;RNA interference;chromatin silencing;siRNA loadin  
establishment of protein localization;intracellular protein transport;protein transport;intracellular transport;cellular  
peptidyl-asparagine modification;protein N-linked glycosylation via asparagine;protein N-linked glycosylation  
mitotic spindle organization;centrosome cycle;centrosome duplication;spindle elongation;mitotic spindle elongati  
protein folding;mitotic spindle organization;spindle organization;microtubule cytoskeleton organization;M phase  
membrane invagination;endocytosis;protein transport;small GTPase mediated signal transduction;intracellular si  
nucleic acid phosphodiester bond hydrolysis;mRNA metabolic process;mRNA cleavage;mRNA processing;RNA  
Unknown

Fatty acid biosynthesis, elongation, mitochondria

cellular component organization at cellular level;cellular component organization or biogenesis at cellular level;c  
oocyte axis specification;oocyte microtubule cytoskeleton polarization;oocyte microtubule cytoskeleton organiza  
nucleic acid phosphodiester bond hydrolysis;mRNA cleavage

Reductive pentose phosphate cycle, glyceraldehyde-3P => RuBP

RNA pol II containing coactivator complex Tat-SF

protein localization in endoplasmic reticulum

AP-1 adaptor complex

purine nucleoside triphosphate biosynthetic process;ATP metabolic process;purine ribonucleoside triphosphate b  
secretion by cell;regulation of neurotransmitter levels;ovarian follicle cell development;oogenesis;neurotransmitt  
biosynthetic process;metabolic process

Unknown

proteolysis;protein metabolic process;macromolecule metabolic process;primary metabolic process;metabolic pr  
oxidative phosphorylation;mitochondrial ATP synthesis coupled electron transport;ATP synthesis coupled elect  
protein glycosylation;glycoprotein biosynthetic process;cellular lipid metabolic process;macromolecule glycosyla  
establishment of protein localization;signal transduction;protein transport;small GTPase mediated signal transdu  
unconventional myosin complex

Golgi vesicle transport;vesicle-mediated transport

peptidyl-asparagine modification;very long-chain fatty acid metabolic process;protein N-linked glycosylation via a  
metabolic process

membrane invagination;endocytosis;small GTPase mediated signal transduction;vesicle fusion;endosomal vesic  
establishment of protein localization;transport;establishment of localization;protein localization;protein transport  
protein glycosylation;peptidyl-asparagine modification;glycoprotein biosynthetic process;protein N-linked glycosy  
metabolic process

mitotic spindle organization;spindle elongation;spindle organization;microtubule cytoskeleton organization;mitoti  
regulation of centrosome duplication;regulation of centrosome cycle;modification-dependent protein catabolic pr  
regulation of cell development;regulation of multicellular organismal development;synaptic transmission;regulati  
COPII complex

Unknown

protein targeting to membrane;peptidyl-asparagine modification;protein N-linked glycosylation via asparagine;pr  
purine nucleoside triphosphate biosynthetic process;ATP metabolic process;purine ribonucleoside triphosphate b  
establishment of protein localization;intracellular protein transport;protein transport;intracellular transport;cellular  
Golgi vesicle transport;protein transport;Golgi organization;small GTPase mediated signal transduction;organelle  
mitotic spindle organization;spindle organization;microtubule cytoskeleton organization;cytoplasmic microtubule  
nucleocytoplasmic transport;protein targeting;nuclear import;protein import into nucleus;protein import  
intracellular protein transport;protein targeting;nuclear import;microtubule cytoskeleton organization;protein impo  
metabolic process

peptidyl-asparagine modification;very long-chain fatty acid metabolic process;protein N-linked glycosylation via a  
cellular biosynthetic process;cellular lipid metabolic process;lipid metabolic process  
ribonucleoprotein complex biogenesis;cellular component biogenesis at cellular level

## (A) entire Hippo-PPIN

mitotic spindle organization;spindle organization;cytoskeleton organization;microtubule cytoskeleton organization  
nuclear-transcribed mRNA catabolic process, deadenylation-dependent decay;nuclear-transcribed mRNA catabolic  
intracellular protein transport;retrograde vesicle-mediated transport, Golgi to ER;Golgi vesicle transport;regulatory  
glycoprotein metabolic process;protein glycosylation;glycoprotein biosynthetic process;macromolecule glycosylation  
signal transduction;regionalization;organ morphogenesis;organ development;intracellular signal transduction  
mRNA metabolic process;mRNA cleavage;mRNA processing;RNA metabolic process;RNA processing  
oocyte axis specification;oocyte development;oocyte microtubule cytoskeleton organization;oocyte construction;  
oocyte axis specification;oocyte microtubule cytoskeleton polarization;oocyte microtubule cytoskeleton organization  
CIN85 complex (CIN85, CRK, BCAR1, CBL, PIK3R1, GRB2, SOS1)  
regulation of cellular process;regulation of nuclear mRNA splicing, via spliceosome;regulation of alternative nuclear  
regulation of actin polymerization or depolymerization;regulation of actin cytoskeleton organization;regulation of  
centrosome cycle;NLS-bearing substrate import into nucleus;centrosome duplication;protein import into nucleus;  
nucleic acid metabolic process;cellular macromolecule metabolic process;nucleobase-containing compound metabolism  
Unknown  
membrane invagination;endocytosis;protein transport;small GTPase mediated signal transduction;intracellular signaling  
POLR2A-CCNT1-CDK9-NCL-LEM6-CPSF2 complex  
purine nucleoside triphosphate biosynthetic process;ATP metabolic process;purine ribonucleoside triphosphate biosynthesis  
Unknown  
protein sumoylation;SMT3-dependent protein catabolic process;positive regulation of NF-kappaB transcription factor activity  
Unknown  
glycoprotein metabolic process;phospholipid metabolic process;protein glycosylation;glycoprotein biosynthetic process  
actomyosin structure organization;actin polymerization or depolymerization;actin filament organization;cytoskeleton  
cellular protein catabolic process;interphase of mitotic cell cycle;proteolysis involved in cellular protein catabolic  
imaginal disc-derived wing morphogenesis;negative regulation of signal transduction;somatic stem cell maintenance  
system development  
peptidyl-amino acid modification;protein glycosylation;peptidyl-asparagine modification;protein N-linked glycosylation  
Wnt receptor signaling pathway  
purine ribonucleotide catabolic process;ribonucleoside triphosphate catabolic process;purine ribonucleoside triphosphate  
translational initiation;spindle elongation;salivary gland histolysis;salivary gland cell autophagic cell death;mitotic  
CDH23-harmonin transmembrane complex  
cellular biosynthetic process;cellular metabolic process;biosynthetic process;primary metabolic process;metabolic  
Unknown  
peptidyl-asparagine modification;protein N-linked glycosylation via asparagine;protein N-linked glycosylation  
compound eye development;eye photoreceptor cell differentiation;compound eye photoreceptor cell differentiation  
peptidyl-asparagine modification;protein N-linked glycosylation via asparagine;protein N-linked glycosylation  
positive regulation of cellular process;positive regulation of biological process;regulation of cellular localization;regulation of  
Coatomer-Arf1 complex  
translational elongation;cellular macromolecule biosynthetic process;cellular protein metabolic process;cellular nucleic acid  
nucleic acid metabolic process;cellular macromolecule metabolic process;nucleobase-containing compound metabolism  
mitotic spindle organization;spindle elongation;spindle organization;microtubule cytoskeleton organization;mitotic  
protein targeting to membrane;protein targeting;protein targeting to ER;SRP-dependent cotranslational protein targeting  
centrosome organization;mitotic spindle organization;centrosome cycle;centrosome duplication;mitotic spindle elongation  
Spliceosome, U1-snRNP  
ncRNA metabolic process;tRNA metabolic process;tRNA aminoacylation;amino acid activation;tRNA aminoacylation  
intracellular protein kinase cascade;signal transduction;cellular protein localization;intracellular signal transduction

(A) entire Hippo-PPIN

II fate specification;R8 cell fate specification

cription, DNA-dependent;regulation of transcription from RNA polymerase II promoter;positive regulat

individualization;spermatid differentiation

cytosis;regulation of neurotransmitter levels;neurotransmitter secretion

eye development

import;protein import into nucleus;SMAD protein import into nucleus

development

rgan development

stis specific;chaperonin-containing T-complex;CCT micro-complex

erm individualization;synaptic vesicle coating

olved in interaction with host;negative regulation of growth of symbiont in host;regulation of growth o  
organization;M phase

on;photoreceptor cell differentiation;compound eye morphogenesis

morphogenesis

anizing center organization

ctor signaling pathway;protein transport;regulation of cell communication

ort

rocess;M phase

on

ulation of cell communication;regulation of signaling

ucle endocytosis

nurse cell to oocyte transport;actin cytoskeleton organization

ification reactions;nuclear mRNA splicing, via spliceosome;regulation of nuclear mRNA splicing, via

hase

velopment involved in chitin-based cuticle molting cycle;larval chitin-based cuticle development

aptic vesicle coating;neurotransmitter secretion

lar signal transduction



(A) entire Hippo-PPIN

on organization  
f apoptotic process;positive regulation of cell death  
ction;intracellular signal transduction  
aptic vesicle coating;neurotransmitter secretion

ort  
in kinase activity;regulation of phosphorylation  
;intracellular signal transduction  
transduction;intracellular signal transduction

n;M phase  
plication;DNA metabolic process  
r signaling pathway;cellular response to insulin stimulus;male germ-line stem cell division  
- signal transduction  
disc morphogenesis;wing disc morphogenesis

organization;M phase

organization;M phase  
ellular signal transduction  
ess  
:ellular signal transduction  
esis coupled electron transport;respiratory electron transport chain

based cuticle molting cycle;larval chitin-based cuticle development;cuticle pattern formation  
cuticle development involved in chitin-based cuticle molting cycle;larval chitin-based cuticle develop

:x (Stt3B variant)  
ton organization  
organization;M phase

otubule cytoskeleton organization;organelle organization  
n;M phase

o ER;Golgi vesicle transport;protein transport

- protein localization  
processing  
sduction

(A) entire Hippo-PPIN

asparagine;long-chain fatty acid metabolic process;fatty acid biosynthetic process  
osome;regulation of RNA splicing;regulation of mRNA processing

cle coating;neurotransmitter secretion

locytosis

ptotic process;hydrogen peroxide catabolic process  
ation;oocyte microtubule cytoskeleton polarization;oocyte microtubule cytoskeleton organization

on

ction;intracellular signal transduction  
rocess;protein metabolic process

n;M phase  
acellular signal transduction

Pase mediated signal transduction

ction;intracellular signal transduction

, aminoacylation for protein translation  
transduction;intracellular signal transduction

involved in RNA interference;siRNA loading onto RISC involved in RNA interference

aptic vesicle coating;neurotransmitter secretion  
erm individualization;synaptic vesicle coating  
icellular organismal homeostasis  
morphogenesis of an epithelium  
ration;oogenesis  
rowth factor receptor signaling pathway;negative regulation of cell communication;negative regulati

leton organization

ton organization

(A) entire Hippo-PPIN

riphosphate catabolic process;GTP metabolic process;GTP catabolic process

tabolic process

asparagine;long-chain fatty acid metabolic process;fatty acid biosynthetic process  
orphogenesis

organization;M phase  
of lipid storage;intracellular transport

orm individualization;synaptic vesicle coating  
cosylation via asparagine;long-chain fatty acid metabolic process;fatty acid biosynthetic process  
ion  
relle organization

ein import into nucleus;SMAD protein import into nucleus

ition;glycosylation  
y;cellular component assembly at cellular level

· signal transduction

iosynthetic process;ATP biosynthetic process;ATP synthesis coupled proton transport

peptidase activity;oocyte microtubule cytoskeleton polarization;oocyte microtubule cytoskeleton org;

organization;M phase

homeostasis  
ic process  
ric microtubule organization  
organization;M phase  
ic process  
· signal transduction

· actin filament polymerization;actin filament organization;regulation of actin filament length  
asparagine;long-chain fatty acid metabolic process;fatty acid biosynthetic process

## (A) entire Hippo-PPIN

aptic vesicle coating;neurotransmitter secretion

duction of siRNA involved in RNA interference;siRNA loading onto RISC involved in RNA interference  
ng onto RISC involved in RNA interference;production of siRNA involved in RNA interference  
protein localization

ion

ignal transduction  
processing

ellular component organization;cytoskeleton organization;organelle organization  
tion;oocyte construction;germarium-derived oocyte fate determination

iosynthetic process;ATP biosynthetic process;ATP synthesis coupled proton transport  
er secretion

rocess

on transport;mitochondrial electron transport, ubiquinol to cytochrome c;respiratory electron transport;  
glycosylation  
ction;intracellular signal transduction

asparagine;long-chain fatty acid metabolic process;fatty acid biosynthetic process

le fusion

lation via asparagine;protein N-linked glycosylation

c spindle elongation

ocess;regulation of microtubule cytoskeleton organization;ubiquitin-dependent protein catabolic pro  
on of nervous system development;regulation of synapse structure and activity

otein N-linked glycosylation;cotranslational protein targeting to membrane

iosynthetic process;ATP biosynthetic process;ATP synthesis coupled proton transport  
protein localization

e organization  
organization;M phase

ort into nucleus

asparagine;long-chain fatty acid metabolic process;fatty acid biosynthetic process

## (A) entire Hippo-PPIN

n;M phase

olic process;G2/M transition DNA damage checkpoint;nuclear-transcribed mRNA poly(A) tail shorter  
on of lipid storage;cellular protein localization  
tion;glycosylation

;germarium-derived oocyte fate determination

tion;oocyte construction;germarium-derived oocyte fate determination

lear mRNA splicing, via spliceosome;regulation of RNA splicing;regulation of mRNA processing

actin filament polymerization;regulation of cytoskeleton organization;regulation of actin filament len

;SMAD protein import into nucleus

tabolic process;RNA metabolic process;cellular nitrogen compound metabolic process

ignal transduction

iosynthetic process;ATP biosynthetic process;ATP synthesis coupled proton transport

actor activity;positive regulation of sequence-specific DNA binding transcription factor activity;regula

rocess;macromolecule glycosylation

ton organization;actin cytoskeleton organization

process;modification-dependent protein catabolic process;ubiquitin-dependent protein catabolic pro

ance;negative regulation of Wnt receptor signaling pathway;ovarian follicle cell development

ation via asparagine;protein N-linked glycosylation

osphate catabolic process;GTP metabolic process;GTP catabolic process

; spindle elongation

ic process

on;photoreceptor cell differentiation;compound eye morphogenesis

egulation of localization;organelle organization

macromolecule metabolic process;translation

tabolic process;cellular nitrogen compound metabolic process

c spindle elongation

argeting to membrane;cotranslational protein targeting to membrane

longation

ation for protein translation

on;JAK-STAT cascade

(A) entire Hippo-PPIN

ion of transcription from RNA polymerase II promoter

of symbiont in host;protein transport

spliceosome;mRNA processing

(A) entire Hippo-PPIN

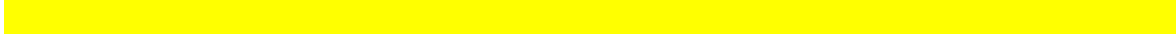

oment;cuticle pattern formation

(A) entire Hippo-PPIN

n of signaling



(A) entire Hippo-PPIN

anization;positive regulation of cysteine-type endopeptidase activity involved in apoptotic process

(A) entire Hippo-PPIN

ice

rt chain

cess

(A) entire Hippo-PPIN

ring;mitotic cell cycle G2/M transition DNA damage checkpoint

length

inhibition of sequence-specific DNA binding transcription factor activity

process

## (B) Ft

| ComplexID | Complex Score | P-value               | Size |
|-----------|---------------|-----------------------|------|
| FC4002    | 0.2825        | 5.85450200021381e-222 | 6    |
| FC3215    | 0.226         | 2.68308917048752e-131 | 7    |
| FC5808    | 0.182         | 1.0965367233923e-84   | 7    |
| FC939     | 1             | 0                     | 3    |
| FC3406    | 0.226         | 2.68308917048752e-131 | 7    |
| FC3762    | 0.225         | 2.5025007128992e-140  | 6    |
| FC4732    | 0.38          | 0                     | 4    |
| FC3474    | 0.1725        | 5.5384597978109e-82   | 6    |
| FC2120    | 0.53          | 0                     | 4    |
| FC4477    | 0.2825        | 5.85450200021381e-222 | 6    |
| FC6308    | 0.15          | 1.0429715269842e-61   | 6    |
| FC6121    | 0.2225        | 3.3657954711152e-137  | 6    |
| FC2153    | 0.195         | 4.27003883244533e-105 | 6    |
| FC1893    | 0.2475        | 4.60516261989697e-170 | 6    |
| FC3999    | 0.25          | 1.52810073679158e-173 | 6    |
| FC6609    | 0.2975        | 2.65567700551251e-246 | 6    |
| FC5088    | 0.25          | 1.52810073679158e-173 | 6    |
| FC47      | 0.22          | 4.17602688713522e-134 | 6    |
| FC3957    | 0.2975        | 2.65567700551251e-246 | 6    |
| FC3331    | 0.235         | 3.41303458113177e-153 | 6    |
| FC4344    | 0.41          | 0                     | 3    |
| FC3622    | 0.4025        | 0                     | 6    |
| FC6451    | 0.15          | 1.0429715269842e-61   | 6    |
| FC5511    | 0.3025        | 1.07012236072524e-254 | 6    |
| FC600     | 0.246666667   | 6.032738029056e-97    | 5    |
| FC5845    | 0.285         | 0                     | 4    |
| FC203     | 0.38          | 0                     | 4    |
| FC4484    | 0.44          | 0                     | 4    |
| FC2025    | 0.89          | 0                     | 4    |
| FC5075    | 0.44          | 0                     | 4    |
| FC2819    | 0.205         | 0                     | 4    |
| FC2607    | 0.6           | 0                     | 3    |
| FC139     | 0.15          | 0                     | 3    |
| FC1109    | 0.6           | 0                     | 3    |
| FC95      | 0.6           | 0                     | 3    |
| FC3753    | 0.36          | 0                     | 3    |

(B) Ft

**Members\_GeneID**

FBgn0020255;FBgn0039302;FBgn0003321;FBgn0052484;FBgn0003346;FBgn0028411  
FBgn0020255;FBgn0039302;FBgn0037364;FBgn0002638;FBgn0003346;FBgn0033160;FBgn0028411  
FBgn0029512;FBgn0029113;FBgn0037715;FBgn0013726;FBgn0026170;FBgn0014029;FBgn0010602  
FBgn0043012;FBgn0010380;FBgn0263350  
FBgn0020255;FBgn0039302;FBgn0031145;FBgn0003321;FBgn0003346;FBgn0026170;FBgn0028411  
FBgn0034691;FBgn0025865;FBgn0001961;FBgn0031799;FBgn0000578;FBgn0004638  
FBgn0010660;FBgn0026143;FBgn0026207;FBgn0034118  
FBgn0015024;FBgn0002413;FBgn0010380;FBgn0035110;FBgn0030631;FBgn0033185  
FBgn0013726;FBgn0014029;FBgn0026361;FBgn0011710  
FBgn0000404;FBgn0020255;FBgn0039302;FBgn0052484;FBgn0003346;FBgn0028411  
FBgn0036448;FBgn0036666;FBgn0031450;FBgn0027363;FBgn0024314;FBgn0004638  
FBgn0038965;FBgn0011642;FBgn0011739;FBgn0261456;FBgn0262029;FBgn0000578  
FBgn0037607;FBgn0039425;FBgn0036784;FBgn0000064;FBgn0050410;FBgn0032820  
FBgn0040064;FBgn0033879;FBgn0028479;FBgn0033883;FBgn0025352;FBgn0033949  
FBgn0000256;FBgn0261259;FBgn0000043;FBgn0261458;FBgn0024238;FBgn0000308  
FBgn0010660;FBgn0038722;FBgn0086558;FBgn0036105;FBgn0034118;FBgn0013334  
FBgn0000045;FBgn0000043;FBgn0261458;FBgn0000042;FBgn0033075;FBgn0000064  
FBgn0262126;FBgn0038947;FBgn0033460;FBgn0262125;FBgn0033339;FBgn0024509  
FBgn0010660;FBgn0027868;FBgn0033737;FBgn0086558;FBgn0034118;FBgn0013334  
FBgn0083969;FBgn0010348;FBgn0015790;FBgn0262125;FBgn0033339;FBgn0024509  
FBgn0025724;FBgn0037549;FBgn0025725  
FBgn0032961;FBgn0014189;FBgn0010348;FBgn0031661;FBgn0033264;FBgn0024509  
FBgn0001235;FBgn0004107;FBgn0031450;FBgn0003093;FBgn0027363;FBgn0024314  
FBgn0020255;FBgn0010621;FBgn0039302;FBgn0003346;FBgn0260990;FBgn0028411  
FBgn0010380;FBgn0263351;FBgn0024833;FBgn0030089;FBgn0039132  
FBgn0027066;FBgn0004177;FBgn0029687;FBgn0038766  
FBgn0010660;FBgn0036997;FBgn0026207;FBgn0034118  
FBgn0262125;FBgn0031818;FBgn0033339;FBgn0024509  
FBgn0003392;FBgn0011225;FBgn0025865;FBgn0063485  
FBgn0032265;FBgn0262125;FBgn0033339;FBgn0024509  
FBgn0025724;FBgn0037549;FBgn0025725;FBgn0037610  
FBgn0085443;FBgn0031450;FBgn0027363  
FBgn0020255;FBgn0039302;FBgn0262743  
FBgn0035060;FBgn0031450;FBgn0027363  
FBgn0032246;FBgn0031450;FBgn0027363  
FBgn0004397;FBgn0028479;FBgn0035432

## (B) Ft

| <b>Members_GeneSymbol</b>                   | <b>Members_SAINTE_Score</b> |
|---------------------------------------------|-----------------------------|
| ran;Nup358;sbr;Sk2;RanGap;Nxt1              | 0.15;1.00;NA;NA;0.98;NA     |
| ran;Nup358;Rab23;Bj1;RanGap;CG11107;Nxt1    | 0.15;1.00;NA;NA;0.98;NA;NA  |
| Aos1;Uba2;CG9399;pnut;smt3;Sep2;lwr         | NA;NA;NA;0.91;NA;1.00;NA    |
| AP-2sigma;Bap;alpha-Adaptin                 | 0.16;1.00;1.00              |
| ran;Nup358;Ntf-2;sbr;RanGap;smt3;Nxt1       | 0.15;1.00;NA;NA;0.98;NA;NA  |
| synj;Cortactin;Sop2;Pez;ena;drk             | NA;0.90;NA;NA;0.91;NA       |
| Nup214;CDC45L;mbo;Nup62                     | 0.60;NA;0.16;0.71           |
| Cklalpha;dco;Bap;thoc7;CG6227;CG1603        | 0.38;0.31;1.00;0.00;NA;NA   |
| pnut;Sep2;Sep5;Sep1                         | 0.91;1.00;NA;0.15           |
| CycA;ran;Nup358;Sk2;RanGap;Nxt1             | NA;0.15;1.00;NA;0.98;NA     |
| mop;TSG101;Hrs;Stam;Plap;drk                | NA;NA;0.99;0.60;NA;NA       |
| mats;Zyx;wts;hpo;d;ena                      | 0.89;NA;NA;0.00;0.00;0.91   |
| CG8036;CG5432;CG5103;Ald;CG30410;fbp        | 0.78;NA;NA;1.00;NA;NA       |
| yip2;CG6543;CG4389;CG16935;Thiolase;CG10131 | NA;NA;1.00;NA;0.99;NA       |
| capu;Fhos;Act42A;capt;Fim;chic              | NA;NA;NA;1.00;1.00;NA       |
| Nup214;Nup58;Ubi-p5E;bls4;Nup62;Sap47       | 0.60;NA;NA;NA;0.71;0.59     |
| Act79B;Act42A;capt;Act5C;Pid;Ald            | NA;NA;1.00;0.00;NA;1.00     |
| gho;sar1;sec24;sec23;sec31;sec13            | NA;NA;NA;NA;1.00;0.88       |
| Nup214;Nup107;Nup54;Ubi-p5E;Nup62;Sap47     | 0.60;NA;NA;NA;0.71;0.59     |
| CG34133;Arf79F;Rab11;sec23;sec31;sec13      | 0.06;0.00;NA;NA;1.00;0.88   |
| beta'Cop;CG7878;alphaCop                    | 0.62;NA;0.41                |
| CG1416;Hel25E;Arf79F;Gmd;Nup50;sec13        | 0.73;0.00;0.00;NA;0.98;0.88 |
| hth;cdc2c;Hrs;Pkc98E;Stam;Plap              | NA;NA;0.99;NA;0.60;NA       |
| ran;Cct5;Nup358;RanGap;yata;Nxt1            | 0.15;NA;1.00;0.98;0.08;NA   |
| Bap;AP-50;AP-47;AP-1gamma;AP-1sigma         | 1.00;0.74;0.00;NA;NA        |
| Eb1;mts;Vap-33-1;CG4854                     | 0.57;NA;0.92;NA             |
| Nup214;CG5955;mbo;Nup62                     | 0.60;NA;0.16;0.71           |
| sec23;CG9536;sec31;sec13                    | NA;NA;1.00;0.88             |
| shi;jar;Cortactin;Lasp                      | 0.88;NA;0.90;0.90           |
| CG18301;sec23;sec31;sec13                   | NA;NA;1.00;0.88             |
| beta'Cop;CG7878;alphaCop;CG8043             | 0.62;NA;0.41;NA             |
| spri;Hrs;Stam                               | NA;0.99;0.60                |
| ran;Nup358;Fs(2)Ket                         | 0.15;1.00;NA                |
| Eps-15;Hrs;Stam                             | 0.17;0.99;0.60              |
| CG5168;Hrs;Stam                             | NA;0.99;0.60                |
| Vinc;CG4389;ZnT63C                          | 0.36;1.00;NA                |

(B) Ft

**Name**

intracellular protein transport;nuclear transport;nucleocytoplasmic transport;protein transport;intracellular transport  
intracellular protein transport;nuclear transport;nucleocytoplasmic transport;protein transport;cellular protein localization  
protein sumoylation;SMT3-dependent protein catabolic process;positive regulation of NF-kappaB transcription factor  
AP2 adaptor complex  
intracellular protein transport;nuclear transport;nucleocytoplasmic transport;protein transport;protein targeting  
regulation of cell shape;embryonic development via the syncytial blastoderm;actin filament organization;ovarian  
protein localization to nucleus;protein targeting;nuclear import;protein import into nucleus;protein import  
Wnt receptor signaling pathway  
cellularization;positive regulation of programmed cell death;regulation of apoptotic process;positive regulation of  
nucleocytoplasmic transport;regulation of protein phosphorylation;regulation of kinase activity;regulation of protein  
establishment of protein localization;regulation of signal transduction;regulation of epidermal growth factor receptor  
compound eye development;organ morphogenesis;eye development;morphogenesis of an epithelium;sensory organ  
Reductive pentose phosphate cycle, glyceraldehyde-3P => RuBP  
Fatty acid biosynthesis, elongation, mitochondria  
oocyte differentiation;oocyte axis specification;actin filament organization;oocyte development;oocyte construction  
nuclear transport;nucleocytoplasmic transport  
cellular component organization at cellular level;cellular component organization or biogenesis at cellular level;cellular  
COPII complex  
transmembrane receptor protein serine/threonine kinase signaling pathway;protein targeting;nuclear import;protein  
regulation of cell morphogenesis;regulation of cell shape;chitin-based larval cuticle pattern formation;cuticle development  
establishment of protein localization;intracellular protein transport;retrograde vesicle-mediated transport, Golgi to ER  
transmembrane receptor protein serine/threonine kinase signaling pathway;nucleocytoplasmic transport;nuclear  
intracellular protein kinase cascade;signal transduction;cellular protein localization;intracellular signal transduction  
intracellular protein transport;nuclear transport;nucleocytoplasmic transport;protein transport;intracellular transport  
AP-1 adaptor complex  
cellular component assembly;organelle assembly;establishment or maintenance of cell polarity;spindle assembly  
protein localization to nucleus;protein targeting;nuclear import;protein import into nucleus;protein import  
intracellular protein transport;chitin-based larval cuticle pattern formation;cuticle development involved in chitin-larval  
sperm individualization complex  
cuticle development involved in protein-based cuticle molting cycle;chitin-based larval cuticle pattern formation;  
intracellular protein transport;retrograde vesicle-mediated transport, Golgi to ER;Golgi vesicle transport;regulation of  
RIN1-STAM2-HRS complex  
RANBP1-RAN-KPNB1 complex  
Protein-sorting complex (Stam2, Hgs, Eps15);Protein-sorting complex (Stam1, Hgs, Eps15)  
Hse1p/Vps27p complex  
Unknown

(B) Ft

ort  
alization  
actor activity;positive regulation of sequence-specific DNA binding transcription factor activity;regula

nurse cell to oocyte transport;actin cytoskeleton organization

f apoptotic process;positive regulation of cell death  
in kinase activity;regulation of phosphorylation  
tor signaling pathway;protein transport;regulation of cell communication  
rgan development

on

ellular component organization;cytoskeleton organization;organelle organization

ein import into nucleus;SMAD protein import into nucleus  
velopment involved in chitin-based cuticle molting cycle;larval chitin-based cuticle development  
o ER;Golgi vesicle transport;protein transport  
import;protein import into nucleus;SMAD protein import into nucleus  
on;JAK-STAT cascade  
ort

y;cellular component assembly at cellular level

based cuticle molting cycle;larval chitin-based cuticle development;cuticle pattern formation

cuticle development involved in chitin-based cuticle molting cycle;larval chitin-based cuticle develop  
on of lipid storage;cellular protein localization



(B) Ft

tion of sequence-specific DNA binding transcription factor activity

oment;cuticle pattern formation

(C) ds

| <b>ComplexID</b> | <b>Compl</b> | <b>P-value</b>        | <b>Size</b> |   |
|------------------|--------------|-----------------------|-------------|---|
| FC3817           | 0.176        | 5.61533760475396e-147 | 7           | 7 |
| FC4398           | 0.22         |                       | 0           | 6 |
| FC4527           | 0.176        | 5.61533760475396e-147 | 7           | 7 |
| FC1893           | 0.25         |                       | 0           | 6 |
| FC6132           | 0.2          |                       | 0           | 6 |

(C) ds

**Members\_GeneID**

FBgn0011305;FBgn0025637;FBgn0004242;FBgn0023423;FBgn0015509;FBgn0017551;FBgn0026176  
FBgn0025637;FBgn0037134;FBgn0031043;FBgn0023423;FBgn0026175;FBgn0001224  
FBgn0000117;FBgn0025637;FBgn0023423;FBgn0026175;FBgn0026597;FBgn0003371;FBgn0035087  
FBgn0040064;FBgn0033879;FBgn0028479;FBgn0033883;FBgn0025352;FBgn0033949  
FBgn0030993;FBgn0033782;FBgn0037894;FBgn0035969;FBgn0013675;FBgn0250814

(C) ds

**Members\_GeneSymbol**

Rsf1;skpA;Syt1;slmb;lin19;Rca1;skpB  
skpA;CG7407;CG14222;slmb;skpC;Hsp23  
arm;skpA;slmb;skpC;Axn;sgg;CG2765  
yip2;CG6543;CG4389;CG16935;Thiolase;CG10131  
Mec2;sug;Ranbp9;CG4476;mt:Coll;CG4169

**Members\_SAIN\_T\_Score**

NA;0.88;NA;1.00;NA;NA;NA  
0.88;NA;NA;1.00;NA;NA  
NA;0.88;1.00;NA;NA;NA;NA  
NA;NA;1.00;NA;1.00;NA  
0.00;NA;0.80;NA;NA;0.97

(C) ds

**Name**

cellular protein catabolic process;interphase of mitotic cell cycle;proteolysis involved in cellular protein catabolic  
regulation of centrosome duplication;regulation of centrosome cycle;modification-dependent protein catabolic pr  
imaginal disc-derived wing morphogenesis;negative regulation of signal transduction;somatic stem cell mainten  
Fatty acid biosynthesis, elongation, mitochondria  
cellular respiration;oxidative phosphorylation;mitochondrial ATP synthesis coupled electron transport;ATP synthe

(C) ds

process;modification-dependent protein catabolic process;ubiquitin-dependent protein catabolic process;regulation of microtubule cytoskeleton organization;ubiquitin-dependent protein catabolic process;negative regulation of Wnt receptor signaling pathway;ovarian follicle cell development

oxidative phosphorylation coupled electron transport;respiratory electron transport chain

(C) ds

rocess  
cess

(D) Fj

| <b>ComplexID</b> | <b>Complex Score</b> | <b>P-value</b> |
|------------------|----------------------|----------------|
| FC4403           | 0.17                 | 0              |
| FC5418           | 0.1933333333         | 0              |
| FC4969           | 0.19                 | 0              |



(D) Fj

**Members\_GeneID**

FBgn0052451;FBgn0260010;FBgn0002031;FBgn0003889;FBgn0038252;FBgn0003885;FBgn0010551  
FBgn0039562;FBgn0037718;FBgn0030170;FBgn0032906;FBgn0010173  
FBgn0053886;FBgn0037354;FBgn0002031;FBgn0033250;FBgn0010551

(D) Fj

**Members\_GeneSymbol**

SPoCk;rump;l(2)37Cc;betaTub85D;CG3509;alphaTub84D;l(2)03709  
Gp93;P58IPK;CG2990;RPA2;RpA-70  
His2B;CG33886;CG12171;l(2)37Cc;CG14762;l(2)03709

**Members\_SAIN\_T\_Score**

NA;0.28;0.57;NA;NA;NA;0.61  
0.17;NA;NA;0.41;0.51  
NA;NA;0.57;NA;0.61

(D) Fj

**Name**

purine ribonucleotide catabolic process;ribonucleoside triphosphate catabolic process;purine ribonucleoside triph  
cellular metabolic process;cellular macromolecule metabolic process;macromolecule metabolic process;DNA re  
Unknown

(D) Fj

inosphate catabolic process;GTP metabolic process;GTP catabolic process  
plication;DNA metabolic process

(E) D

| ComplexID | Size | Complex Score | P-value               | Size |
|-----------|------|---------------|-----------------------|------|
| FC6116    | 5    | 0.256666667   | 1.21554769143873e-298 | 7    |
| FC2526    | 5    | 0.416666667   |                       | 5    |
| FC4500    | 7    | 0.34          |                       | 5    |
| FC1385    | 7    | 0.214         |                       | 0    |
| FC809     | 7    | 0.166         |                       | 0    |
| FC2633    | 7    | 0.288         |                       | 0    |
| FC6279    | 6    | 0.315         | 4.34657431415275e-232 |      |
| FC904     | 5    | 0.18          | 3.80716364027382e-146 |      |
| FC5418    | 5    | 0.256666667   | 1.21554769143873e-298 |      |
| FC1290    | 4    | 0.625         |                       | 0    |
| FC1412    | 4    | 0.385         |                       | 0    |
| FC1155    | 4    | 0.16          | 4.14985659896385e-95  |      |
| FC3130    | 4    | 0.205         | 7.04655367841301e-157 |      |

(E) D

**Members\_GeneID**

FBgn0087035;FBgn0028734;FBgn0261931;FBgn0038609;FBgn0039016  
FBgn0030322;FBgn0027375;FBgn0002906;FBgn0032906;FBgn0010173  
FBgn0087035;FBgn0031951;FBgn0032515;FBgn0034246;FBgn0028734;FBgn0003261;FBgn0039016  
FBgn0035720;FBgn0040045;FBgn0003449;FBgn0003261;FBgn0029979;FBgn0004227;FBgn0015520  
FBgn0030170;FBgn0037531;FBgn0036248;FBgn0002542;FBgn0010438;FBgn0032906;FBgn0010173  
FBgn0035121;FBgn0087035;FBgn0031951;FBgn0034246;FBgn0028734;FBgn0039016;FBgn0024183  
FBgn0037834;FBgn0005648;FBgn0004903;FBgn0052685;FBgn0261380;FBgn0029979  
FBgn0051992;FBgn0004903;FBgn0052685;FBgn0029979;FBgn0261710  
FBgn0039562;FBgn0037718;FBgn0030170;FBgn0032906;FBgn0010173  
FBgn0030322;FBgn0031484;FBgn0032906;FBgn0010173  
FBgn0041627;FBgn0032906;FBgn0010173;FBgn0011774  
FBgn0031296;FBgn0000181;FBgn0031264;FBgn0086904  
FBgn0015331;FBgn0039025;FBgn0014163;FBgn0029687

(E) D

| <b>Members_GeneSymbol</b>                    | <b>Members_SAIN_T_Score</b>  |
|----------------------------------------------|------------------------------|
| AGO2;Fmr1;CG42797;Nup43;Dcr-1                | 0.77;0.93;NA;NA;NA           |
| CG15220;RecQ5;mus309;RPA2;RpA-70             | 0.48;NA;NA;0.77;0.91         |
| AGO2;r2d2;loqs;Dcr-2;Fmr1;Rm62;Dcr-1         | 0.77;NA;NA;NA;0.93;0.97;NA   |
| CG10077;CR12460;snf;Rm62;CG10777;nonA;nonA-l | NA;NA;0.18;0.97;0.72;0.17;NA |
| CG2990;CG10445;ssp;lds;mtSSB;RPA2;RpA-70     | NA;NA;NA;NA;0.06;0.77;0.91   |
| Tudor-SN;AGO2;r2d2;Dcr-2;Fmr1;Dcr-1;vig      | NA;0.77;NA;NA;0.93;NA;0.67   |
| Art1;Pabp2;Rb97D;ZAP3;mRpL37;CG10777         | NA;0.88;NA;0.54;NA;0.72      |
| gw;Rb97D;ZAP3;CG10777;nocte                  | NA;NA;0.54;0.72;0.00         |
| Gp93;P58IPK;CG2990;RPA2;RpA-70               | 0.00;NA;NA;0.77;0.91         |
| CG15220;CG3165;RPA2;RpA-70                   | 0.48;NA;0.77;0.91            |
| Ku80;RPA2;RpA-70;lrpb                        | NA;0.77;0.91;NA              |
| CG4415;bic;CG11835;Nacalpa                   | NA;0.42;NA;0.32              |
| abs;CG7023;fax;Vap-33-1                      | NA;NA;0.41;0.91              |

(E) D

**Name**

RNA interference;small RNA loading onto RISC;production of small RNA involved in gene silencing by RNA;pro  
RPA-MSH4-BLM complex

RNA interference;small RNA loading onto RISC;posttranscriptional gene silencing by RNA;production of siRNA i  
snRNP-free U1A (SF-A) complex

cellular macromolecule biosynthetic process;nucleic acid metabolic process;nucleobase-containing compound m  
RNA-induced silencing complex

Unknown

Unknown

cellular metabolic process;cellular macromolecule metabolic process;macromolecule metabolic process;DNA re  
nucleic acid metabolic process;DNA replication;DNA metabolic process;DNA-dependent DNA replication

53BP1-containing complex

nascent polypeptide-associated complex

cell death;apoptotic process;programmed cell death;death



(E) D

duction of siRNA involved in RNA interference;siRNA loading onto RISC involved in RNA interferen

involved in RNA interference;siRNA loading onto RISC involved in RNA interference

metabolic process;DNA replication;DNA metabolic process

plication;DNA metabolic process

(E) D

ice

(F) Mer

| <b>ComplexID</b> | <b>Complex Score</b> | <b>P-value</b>        | <b>Size</b> |
|------------------|----------------------|-----------------------|-------------|
| FC4275           | 0.265                | 0                     | 10          |
| FC6162           | 0.248                | 0                     | 7           |
| FC4940           | 0.306                | 0                     | 7           |
| FC3863           | 0.252                | 0                     | 7           |
| FC3293           | 0.1675               | 3.13326061483142e-248 | 6           |
| FC3246           | 0.18                 | 6.50376313421744e-287 | 6           |
| FC3547           | 0.3825               | 0                     | 6           |
| FC4845           | 0.3825               | 0                     | 6           |
| FC6307           | 0.3825               | 0                     | 6           |
| FC1410           | 0.1975               | 0                     | 6           |
| FC5980           | 0.4425               | 0                     | 6           |
| FC1808           | 0.23                 | 0                     | 6           |
| FC4285           | 0.225                | 0                     | 6           |
| FC5181           | 0.223333333          | 0                     | 5           |
| FC5993           | 0.173333333          | 2.27454556524246e-272 | 5           |
| FC4015           | 0.183333333          | 6.68333082089501e-305 | 5           |
| FC5548           | 0.183333333          | 6.68333082089501e-305 | 5           |
| FC3395           | 0.465                | 0                     | 4           |

(F) Mer

**Members\_GeneID**

FBgn0003139;FBgn0030086;FBgn0003676;FBgn0037632;FBgn0010621;FBgn0023423;FBgn0051852;FBgn0003139;FBgn0016700;FBgn0014009;FBgn0014010;FBgn0051523;FBgn0051522;FBgn0010348  
FBgn0000319;FBgn0036579;FBgn0024814;FBgn0016693;FBgn0032456;FBgn0036309;FBgn0033453  
FBgn0029118;FBgn0032444;FBgn0020369;FBgn0027329;FBgn0033342;FBgn0028687;FBgn0032393  
FBgn0039562;FBgn0004907;FBgn0020622;FBgn0013984;FBgn0024248;FBgn0250814  
FBgn0016700;FBgn0003716;FBgn0015797;FBgn0010348;FBgn0011016;FBgn0022268  
FBgn0000319;FBgn0024814;FBgn0016693;FBgn0014010;FBgn0038519;FBgn0036309  
FBgn0000319;FBgn0024814;FBgn0035136;FBgn0016693;FBgn0261797;FBgn0036309  
FBgn0000319;FBgn0024814;FBgn0016693;FBgn0035918;FBgn0036309;FBgn0031849  
FBgn0000319;FBgn0024814;FBgn0012036;FBgn0039642;FBgn0261243;FBgn0035147  
FBgn0000319;FBgn0024814;FBgn0016693;FBgn0035147;FBgn0036309;FBgn0032393  
FBgn0000317;FBgn0011225;FBgn0002938;FBgn0004687;FBgn0005634;FBgn0003514  
FBgn0000319;FBgn0014009;FBgn0014010;FBgn0015790;FBgn0010348;FBgn0036309  
FBgn0087035;FBgn0031951;FBgn0034246;FBgn0037328;FBgn0003279  
FBgn0039562;FBgn0034277;FBgn0014868;FBgn0014189;FBgn0010348  
FBgn0000319;FBgn0024814;FBgn0027494;FBgn0036309;FBgn0035440  
FBgn0000319;FBgn0014143;FBgn0024814;FBgn0027835;FBgn0036309  
FBgn0000319;FBgn0086656;FBgn0004587;FBgn0022238

(F) Mer

**Members\_GeneSymbol**

PpV;CG7033;T-cp1;Tcp-1eta;Cct5;slmb;Tap42;twc;CG8258;Tcp-1zeta  
Chc;Rab1;Rab2;Rab5;CG31523;CG31522;Arf79F  
Chc;CG5027;Clc;Past1;MRP;Hip1;CG1667  
Such;CG5525;Pros45;Tcp-1zeta;CG8258;Rpt1;CG12264  
Gp93;14-3-3zeta;Pi3K21B;InR;chico;CG4169  
Rab1;tkv;Rab6;Arf79F;SsRbeta;KdelR  
Chc;Clc;Past1;Rab5;Prx3;Hip1  
Chc;Clc;CG6905;Past1;Dhc64C;Hip1  
Chc;Clc;Past1;Cdc6;Hip1;CG11327  
Chc;Clc;Aldh;CG11882;Psa;Gale  
Chc;Clc;Past1;Gale;Hip1;CG12264  
ck;jar;ninaC;Mlc-c;zip;sqh  
Chc;Rab2;Rab5;Rab11;Arf79F;Hip1  
AGO2;r2d2;Dcr-2;RpL35A;RpL4  
Gp93;CG6370;Ost48;Hel25E;Arf79F  
Chc;Clc;RpS10a;Hip1;CG14969  
Chc;croc;Clc;Dp1;Hip1  
Chc;shrb;B52;lolal

(F) Mer

**Members\_SAIN\_T\_Score**

NA;1.00;0.00;0.64;0.38;NA;NA;NA;0.57;0.88  
1.00;0.72;0.00;0.00;NA;NA;0.52  
1.00;NA;0.55;0.98;NA;NA;NA  
0.00;0.69;0.00;0.88;0.57;0.00;NA  
0.67;0.69;NA;NA;NA;0.00  
0.72;NA;NA;0.52;0.20;NA  
1.00;0.55;0.98;0.00;NA;NA  
1.00;0.55;NA;0.98;NA;NA  
1.00;0.55;0.98;NA;NA;NA  
1.00;0.55;NA;NA;NA;0.24  
1.00;0.55;0.98;0.24;NA;NA  
0.92;0.99;NA;0.00;0.00;0.00  
1.00;0.00;0.00;0.38;0.52;NA  
0.67;NA;NA;NA;0.93  
0.67;NA;NA;0.00;0.52  
1.00;0.55;0.00;NA;NA  
1.00;NA;0.55;NA;NA  
1.00;0.93;NA;NA

(F) Mer

**Name**

mitotic spindle organization;neurogenesis;spindle organization;cytoskeleton organization;microtubule cytoskeleton membrane invagination;synaptic vesicle transport;endocytosis;small GTPase mediated signal transduction;synaptic vesicle budding;synaptic vesicle endocytosis;synaptic vesicle budding from presynaptic membrane;specialized metabolic process

primary spermatocyte growth;transmembrane receptor protein tyrosine kinase signaling pathway;insulin receptor secretion by cell;Golgi vesicle transport;small GTPase mediated signal transduction;synaptic transmission;intracellular vesicle organization;endocytosis;synaptic vesicle transport;synaptic vesicle endocytosis;synaptic transmission intracellular protein transport;membrane invagination;germ cell development;endocytosis;protein transport membrane organization;cellular membrane organization;membrane invagination;vesicle-mediated transport;endocytosis;synaptic vesicle budding;synaptic vesicle endocytosis;synaptic vesicle budding from presynaptic membrane;synaptic vesicle budding;synaptic vesicle endocytosis;synaptic vesicle budding from presynaptic membrane;specialized unconventional myosin complex

endocytosis;synaptic vesicle transport;protein transport;small GTPase mediated signal transduction;synaptic vesicle heterochromatin organization involved in chromatin silencing;RNA interference;chromatin silencing;siRNA loading cellular protein metabolic process;cellular macromolecule metabolic process;macromolecule metabolic process synaptic vesicle budding;synaptic vesicle endocytosis;synaptic vesicle budding from presynaptic membrane;synaptic vesicle budding;synaptic vesicle endocytosis;synaptic vesicle budding from presynaptic membrane;synaptic regulation of growth

(F) Mer

on organization  
aptic vesicle endocytosis  
orm individualization;synaptic vesicle coating

r signaling pathway;cellular response to insulin stimulus;male germ-line stem cell division  
ellular signal transduction

locytosis  
aptic vesicle coating;neurotransmitter secretion  
orm individualization;synaptic vesicle coating

sicle endocytosis  
ng onto RISC involved in RNA interference;production of siRNA involved in RNA interference

aptic vesicle coating;neurotransmitter secretion  
aptic vesicle coating;neurotransmitter secretion



(G) Sav

| <b>ComplexID</b> | <b>Comple</b> | <b>P-value</b> | <b>Size</b> |
|------------------|---------------|----------------|-------------|
| FC4500           | 0.16          | 0              | 7           |
| FC3622           | 0.255         | 0              | 6           |
| FC5511           | 0.1775        | 0              | 6           |
| FC292            | 0.15          | 0              | 4           |
| FC5851           | 0.205         | 0              | 4           |

(G) Sav

**Members\_GeneID**

FBgn0087035;FBgn0031951;FBgn0032515;FBgn0034246;FBgn0028734;FBgn0003261;FBgn0039016  
FBgn0032961;FBgn0014189;FBgn0010348;FBgn0031661;FBgn0033264;FBgn0024509  
FBgn0020255;FBgn0010621;FBgn0039302;FBgn0003346;FBgn0260990;FBgn0028411  
FBgn0036702;FBgn0002031;FBgn0024992;FBgn0010551  
FBgn0021795;FBgn0050338;FBgn0039635;FBgn0032393

(G) Sav

| <b>Members_GeneSymbol</b>            | <b>Members_SAIN_T_Score</b> |
|--------------------------------------|-----------------------------|
| AGO2;r2d2;loqs;Dcr-2;Fmr1;Rm62;Dcr-1 | 0.35;NA;NA;NA;0.48;0.45;NA  |
| CG1416;Hel25E;Arf79F;Gmd;Nup50;sec1  | 0.14;0.00;0.88;NA;0.88;NA   |
| ran;Cct5;Nup358;RanGap;yata;Nxt1     | 0.95;0.54;0.17;NA;NA;NA     |
| CG6512;l(2)37Cc;CG2658;l(2)03709     | 0.09;0.21;NA;0.60           |
| Tapdelta;CG30338;CG11876;CG12264     | 0.13;NA;0.28;0.30           |

(G) Sav

**Name**

RNA interference;small RNA loading onto RISC;posttranscriptional gene silencing by RNA;production of siRNA i  
transmembrane receptor protein serine/threonine kinase signaling pathway;nucleocytoplasmic transport;nuclear  
intracellular protein transport;nuclear transport;nucleocytoplasmic transport;protein transport;intracellular transpc  
macromolecule catabolic process;protein catabolic process  
carboxylic acid metabolic process;cellular ketone metabolic process;organic acid metabolic process;oxoacid me

(G) Sav

involved in RNA interference;siRNA loading onto RISC involved in RNA interference  
import;protein import into nucleus;SMAD protein import into nucleus  
ort

abolic process

(H) Hpo

| <b>ComplexID</b> | <b>Complex Score</b> | <b>P-value</b>        | <b>Size</b> |
|------------------|----------------------|-----------------------|-------------|
| FC6162           | 0.152                | 5.38806251542414e-245 | 7           |
| FC4811           | 0.41                 |                       | 0 6         |
| FC3389           | 0.165                | 1.33410367635973e-186 | 6           |
| FC4285           | 0.19                 | 6.9194482227847e-248  | 6           |
| FC5561           | 0.38                 |                       | 0 5         |
| FC6690           | 0.31                 |                       | 0 5         |
| FC5695           | 0.343333333          |                       | 0 5         |

(H) Hpo

**Members\_GeneID**

FBgn0000319;FBgn0016700;FBgn0014009;FBgn0014010;FBgn0051523;FBgn0051522;FBgn0010348  
FBgn0010516;FBgn0029093;FBgn0037551;FBgn0037643;FBgn0039674;FBgn0035811  
FBgn0004907;FBgn0020622;FBgn0013984;FBgn0024248;FBgn0003517;FBgn0250814  
FBgn0000319;FBgn0014009;FBgn0014010;FBgn0015790;FBgn0010348;FBgn0036309  
FBgn0038965;FBgn0011739;FBgn0039055;FBgn0261456;FBgn0053193  
FBgn0030993;FBgn0029093;FBgn0029118;FBgn0039130;FBgn0035811  
FBgn0029093;FBgn0029118;FBgn0013770;FBgn0030670;FBgn0035811

(H) Hpo

| <b>Members_GeneSymbol</b>                 | <b>Members_SAIN_T_Score</b>    |
|-------------------------------------------|--------------------------------|
| Chc;Rab1;Rab2;Rab5;CG31523;CG31522;Arf79F | 0.00;0.00;0.27;0.49;NA;NA;0.99 |
| wal;cathD;Gie;skap;CG1907;CG12262         | 0.38;0.40;0.39;0.52;NA;0.47    |
| 14-3-3zeta;Pi3K21B;lnR;chico;sta;CG4169   | 0.00;NA;NA;NA;0.79;0.66        |
| Chc;Rab2;Rab5;Rab11;Arf79F;Hip1           | 0.00;0.27;0.49;NA;0.99;NA      |
| mats;wts;Rassf;hpo;sav                    | 0.14;NA;1.00;NA;1.00           |
| Mec2;cathD;Sucb;CG5854;CG12262            | 0.01;0.40;0.16;0.37;0.47       |
| cathD;Sucb;Cp1;Pis;CG12262                | 0.40;0.16;0.69;NA;0.47         |



## (H) Hpo

### Name

membrane invagination;synaptic vesicle transport;endocytosis;small GTPase mediated signal transduction;syna  
Unknown  
primary spermatocyte growth;transmembrane receptor protein tyrosine kinase signaling pathway;insulin receptor  
endocytosis;synaptic vesicle transport;protein transport;small GTPase mediated signal transduction;synaptic ves  
R8 cell differentiation;R8 cell fate commitment;compound eye photoreceptor fate commitment;photoreceptor ce  
cellular catabolic process  
salivary gland morphogenesis;histolysis;salivary gland histolysis;salivary gland cell autophagic cell death;gland r

(H) Hpo

ptic vesicle endocytosis

r signaling pathway;cellular response to insulin stimulus;male germ-line stem cell division

sicle endocytosis

ll fate specification;R8 cell fate specification

morphogenesis

(I) Mats

| <b>ComplexID</b> | <b>ComplexP-value</b> | <b>Size</b> | <b>Size</b> |
|------------------|-----------------------|-------------|-------------|
| FC4014           | 0.17                  | 0           | 7           |
| FC694            | 0.338                 | 0           | 7           |
| FC4886           | 0.156                 | 0           | 7           |

(I) Mats

**Members\_GeneID**

FBgn0041191;FBgn0015797;FBgn0020240;FBgn0028970;FBgn0014010;FBgn0053087;FBgn0015795  
FBgn0263852;FBgn0014868;FBgn0034277;FBgn0031149;FBgn0032015;FBgn0011336;FBgn0053303  
FBgn0034277;FBgn0014868;FBgn0021795;FBgn0028419;FBgn0019925;FBgn0086357;FBgn0039303

(I) Mats

**Members\_GeneSymbol**

Rheb;Rab6;Mcr;betaggt-II;Rab5;LRP1;Rab7

I(2)k12914;Ost48;CG6370;CG1518;CG7830;OstStt3;CG33303

CG6370;Ost48;Tapdelta;Kr-h2;Surf4;Sec61alpha;CG11857

**Members\_SAIN\_T\_Score**

NA;0.38;NA;NA;0.62;NA;0.47

NA;0.86;0.65;NA;0.75;NA;0.29

0.65;0.86;0.13;NA;0.00;NA;NA

## (I) Mats

### **Name**

membrane invagination;endocytosis;protein transport;small GTPase mediated signal transduction;intracellular si  
Oligosaccharyltransferase complex (Stt3A variant);Oligosaccharyltransferase;Oligosaccharyltransferase comple  
peptidyl-amino acid modification;peptidyl-asparagine modification;protein N-linked glycosylation via asparagine;

## (I) Mats

signal transduction

Stt3B variant

protein localization in endoplasmic reticulum;protein N-linked glycosylation

(J) Wts

| <b>ComplexID</b> | <b>Complex Score</b> | <b>P-value</b>        | <b>Size</b> |
|------------------|----------------------|-----------------------|-------------|
| FC4811           | 0.2925               |                       | 0 6         |
| FC3863           | 0.24                 | 2.30366758810808e-185 | 7           |
| FC3622           | 0.2175               | 2.0997789948253e-321  | 6           |
| FC3389           | 0.1625               | 1.12014852578883e-178 | 6           |
| FC3051           | 0.303333333          |                       | 0 5         |
| FC6690           | 0.52                 |                       | 0 5         |
| FC5695           | 0.616666667          |                       | 0 5         |
| FC5851           | 0.305                |                       | 0 4         |
| FC5349           | 0.28                 | 4.41329803076882e-35  | 3           |
| FC2429           | 0.24                 | 1.30572532926988e-25  | 3           |
| FC1611           | 0.65                 | 6.00056795270748e-192 | 3           |
| FC3501           | 0.48                 | 2.37030589033735e-104 | 3           |
| FC2304           | 0.24                 | 1.30572532926988e-25  | 3           |



(J) Wts

**Members\_GeneID**

FBgn0010516;FBgn0029093;FBgn0037551;FBgn0037643;FBgn0039674;FBgn0035811  
FBgn0029118;FBgn0032444;FBgn0020369;FBgn0027329;FBgn0033342;FBgn0028687;FBgn0032393  
FBgn0032961;FBgn0014189;FBgn0010348;FBgn0031661;FBgn0033264;FBgn0024509  
FBgn0004907;FBgn0020622;FBgn0013984;FBgn0024248;FBgn0003517;FBgn0250814  
FBgn0023537;FBgn0038326;FBgn0033879;FBgn0028479;FBgn0035811  
FBgn0030993;FBgn0029093;FBgn0029118;FBgn0039130;FBgn0035811  
FBgn0029093;FBgn0029118;FBgn0013770;FBgn0030670;FBgn0035811  
FBgn0021795;FBgn0050338;FBgn0039635;FBgn0032393  
FBgn0004237;FBgn0004401;FBgn0004227  
FBgn0030322;FBgn0032906;FBgn0010173  
FBgn0011225;FBgn0011273;FBgn0000253  
FBgn0002921;FBgn0013770;FBgn0033259  
FBgn0036248;FBgn0032906;FBgn0010173

(J) Wts

| <b>Members_GeneSymbol</b>                        | <b>Members_SAIN_T_Score</b>      |
|--------------------------------------------------|----------------------------------|
| wal;cathD;Gie;skap;CG1907;CG12262                | NA;0.47;0.00;0.70;NA;0.99        |
| Sucb;CG5525;Pros45;Tcp-1zeta;CG8258;Rpt1;CG12264 | 0.42;0.15;NA;0.91;0.00;0.07;0.56 |
| CG1416;Hel25E;Arf79F;Gmd;Nup50;sec13             | 0.58;0.79;0.00;NA;0.00;0.29      |
| 14-3-3zeta;Pi3K21B;InR;chico;sta;CG4169          | 0.20;NA;NA;NA;0.46;0.45          |
| CG17896;CG5044;CG6543;CG4389;CG12262             | NA;NA;NA;0.91;0.99               |
| Mec2;cathD;Sucb;CG5854;CG12262                   | 0.67;0.47;0.42;NA;0.99           |
| cathD;Sucb;Cp1;Pis;CG12262                       | 0.47;0.42;0.96;NA;0.99           |
| Tapdelta;CG30338;CG11876;CG12264                 | 0.10;NA;0.51;0.56                |
| Hrb87F;Pep;nonA                                  | 0.00;0.35;0.28                   |
| CG15220;RPA2;RpA-70                              | 0.00;0.34;0.24                   |
| jar;And;Cam                                      | 0.89;NA;0.65                     |
| Atpalpha;Cp1;CG11210                             | 0.48;0.96;NA                     |
| ssp;RPA2;RpA-70                                  | NA;0.34;0.24                     |

(J) Wts

**Name**

Unknown

metabolic process

transmembrane receptor protein serine/threonine kinase signaling pathway;nucleocytoplasmic transport;nuclear primary spermatocyte growth;transmembrane receptor protein tyrosine kinase signaling pathway;insulin receptor

Malonate semialdehyde pathway, propanoyl-CoA => Acetyl-CoA

cellular catabolic process

salivary gland morphogenesis;histolysis;salivary gland histolysis;salivary gland cell autophagic cell death;gland r

carboxylic acid metabolic process;cellular ketone metabolic process;organic acid metabolic process;oxoacid me

RNA splicing, via transesterification reactions with bulged adenosine as nucleophile;RNA splicing, via transester

DNA replication factor A complex;RPA complex;RP-A

myosin VI complex

Unknown

DNA replication factor A complex

(J) Wts

import;protein import into nucleus;SMAD protein import into nucleus  
r signaling pathway;cellular response to insulin stimulus;male germ-line stem cell division

morphogenesis

tabolic process

ification reactions;nuclear mRNA splicing, via spliceosome;regulation of nuclear mRNA splicing, via

(J) Wts

spliceosome;mRNA processing

(K) Ex

| <b>ComplexID</b> | <b>Complex</b> | <b>P-value</b> | <b>Size</b> |
|------------------|----------------|----------------|-------------|
| FC4500           | 0.16           | 0              | 7           |
| FC1385           | 0.176          | 0              | 7           |
| FC1644           | 0.215          | 0              | 4           |

(K) Ex

**Members\_GeneID**

FBgn0087035;FBgn0031951;FBgn0032515;FBgn0034246;FBgn0028734;FBgn0003261;FBgn0039016  
FBgn0035720;FBgn0040045;FBgn0003449;FBgn0003261;FBgn0029979;FBgn0004227;FBgn0015520  
FBgn0014868;FBgn0037374;FBgn0025700;FBgn0030992

(K) Ex

**Members\_GeneSymbol**

AGO2;r2d2;loqs;Dcr-2;Fmr1;Rm62;Dcr-1  
CG10077;CR12460;snf;Rm62;CG10777;nonA;nonA-I  
Ost48;jagn;CG5885;CG33253

**Members\_SAIN\_T\_Score**

0.27;NA;NA;NA;0.53;0.54;NA  
NA;NA;0.21;0.54;0.13;0.82;NA  
NA;NA;0.43;0.57



(K) Ex

**Name**

RNA interference;small RNA loading onto RISC;posttranscriptional gene silencing by RNA;production of siRNA i  
snRNP-free U1A (SF-A) complex

Unknown

(K) Ex

involved in RNA interference;siRNA loading onto RISC involved in RNA interference

(L) Yki

| <b>ComplexID</b> | <b>Comple</b> | <b>P-value</b>        | <b>Size</b> |
|------------------|---------------|-----------------------|-------------|
| FC6496           | 0.25          | 3.08427595750525e-236 | 6           |
| FC5115           | 0.2           |                       | 7           |
| FC3346           | 0.2           |                       | 7           |
| FC5080           | 0.2           |                       | 7           |
| FC6161           | 0.2           |                       | 7           |
| FC6254           | 0.4275        |                       | 6           |
| FC2716           | 0.495         |                       | 6           |
| FC3531           | 0.25          | 3.08427595750525e-236 | 6           |
| FC2915           | 0.25          | 3.08427595750525e-236 | 6           |
| FC6390           | 0.25          | 3.08427595750525e-236 | 6           |

(L) Yki

**Members\_GeneID**

FBgn0035872;FBgn0036023;FBgn0002021;FBgn0035987;FBgn0261641;FBgn0051235  
FBgn0035872;FBgn0036023;FBgn0035987;FBgn0014366;FBgn0261641;FBgn0051235;FBgn0038464  
FBgn0034141;FBgn0035872;FBgn0036023;FBgn0035987;FBgn0261641;FBgn0015520;FBgn0051235  
FBgn0260934;FBgn0004907;FBgn0028833;FBgn0041210;FBgn0038197;FBgn0005198;FBgn0020238  
FBgn0260934;FBgn0004907;FBgn0032670;FBgn0034145;FBgn0041210;FBgn0038197;FBgn0020238  
FBgn0035872;FBgn0036023;FBgn0035213;FBgn0035987;FBgn0037182;FBgn0000556  
FBgn0035872;FBgn0259174;FBgn0035987;FBgn0003557;FBgn0003277;FBgn0020279  
FBgn0004907;FBgn0038167;FBgn0037465;FBgn0260972;FBgn0025803;FBgn0020238  
FBgn0004907;FBgn0038606;FBgn0034970;FBgn0003345;FBgn0067864;FBgn0001263  
FBgn0035872;FBgn0034644;FBgn0036023;FBgn0035213;FBgn0035987;FBgn0032053

(L) Yki

| <b>Members_GeneSymbol</b>                               | <b>Members_SAIN_T_Score</b> |
|---------------------------------------------------------|-----------------------------|
| CG7185;CG18179;l(2)37Bb;CG3689;CG42724;CG31235          | 1.00;NA;NA;1.00;0.00;NA     |
| CG7185;CG18179;CG3689;noi;CG42724;CG31235;CG16941       | 1.00;NA;1.00;NA;0.00;NA;NA  |
| CG8311;CG7185;CG18179;CG3689;CG42724;nonA-I;CG31235     | NA;1.00;NA;1.00;0.00;NA;NA  |
| par-1;14-3-3zeta;Dak1;HDAC4;foxo;gig;14-3-3epsilon      | NA;1.00;NA;NA;NA;NA;1.00    |
| par-1;14-3-3zeta;CG5783;CG5065;HDAC4;foxo;14-3-3epsilon | NA;1.00;NA;NA;NA;NA;1.00    |
| CG7185;CG18179;CG2199;CG3689;ArfGAP3;Ef1alpha48D        | 1.00;NA;NA;1.00;0.71;0.00   |
| CG7185;Nedd4;CG3689;Su(dx);RpII215;lig                  | 1.00;NA;1.00;NA;0.98;0.00   |
| 14-3-3zeta;lkb1;CG1105;alc;SNF4Agamma;14-3-3epsilon     | 1.00;NA;NA;NA;NA;1.00       |
| 14-3-3zeta;CG15803;yki;sd;Patj;inaD                     | 1.00;NA;NA;1.00;NA;NA       |
| CG7185;CG10082;CG18179;CG2199;CG3689;mRpL51             | 1.00;0.00;NA;NA;1.00;NA     |

(L) Yki

**Name**

nucleic acid phosphodiester bond hydrolysis;mRNA metabolic process;mRNA cleavage;mRNA processing;RNA  
nucleic acid metabolic process;mRNA metabolic process;mRNA processing;RNA metabolic process;RNA proces  
mRNA metabolic process;mRNA cleavage;mRNA processing;RNA metabolic process;RNA processing  
oocyte axis specification;oocyte development;oocyte microtubule cytoskeleton organization;oocyte construction;  
oocyte axis specification;oocyte microtubule cytoskeleton polarization;oocyte microtubule cytoskeleton organiza  
nucleic acid phosphodiester bond hydrolysis;mRNA cleavage  
CPSF6-ITCH-NUDT21-POLR2A-UBAP2L complex  
oocyte axis specification;oocyte microtubule cytoskeleton polarization;oocyte microtubule cytoskeleton organiza  
TEAD2-multiprotein complex  
nucleic acid phosphodiester bond hydrolysis;mRNA cleavage

(L) Yki

processing  
ssing

;germarium-derived oocyte fate determination  
tion;oocyte construction;germarium-derived oocyte fate determination

tion;oocyte construction;germarium-derived oocyte fate determination

Type of file: table

Label: Table S7

Filename: 2013-Kwon-Science-Hippo\_table\_S7.xlsx



| category                          | figureID | ComplexID | Complex Score | P-value               | Size | Members_GeneID                                                                                              | Members_GeneSymbol                                  | Members_SAINTE_Score                     | Name                                                                                                                                                                                                                                                                   |
|-----------------------------------|----------|-----------|---------------|-----------------------|------|-------------------------------------------------------------------------------------------------------------|-----------------------------------------------------|------------------------------------------|------------------------------------------------------------------------------------------------------------------------------------------------------------------------------------------------------------------------------------------------------------------------|
| Hpo related                       | A        | FC5561    | 1             | 2.89341618770299e-267 | 5    | FBgn0038965;FBgn0011739;FBgn0039055;FBgn0261456;FBgn0053193                                                 | mats;wts;Rassf;hpo;sav                              | 1.00;1.00;1.00;1.00;1.00                 | R8 cell differentiation;R8 cell fate commitment;compound eye photoreceptor fate commitment;photoreceptor cell fate specification;R8 cell fate specification                                                                                                            |
| Hpo related                       | B        | FC6121    | 0.7275        | 1.20509155311061e-112 | 6    | FBgn0038965;FBgn0011642;FBgn0011739;FBgn0261456;FBgn0262029;FBgn000578                                      | mats;Zyx;wts;hpo;d;ena                              | 1.00;NA;1.00;1.00;0.00;0.91              | compound eye development;organ morphogenesis;eye development;morphogenesis of an epithelium;sensory organ development                                                                                                                                                  |
| Hpo related                       | C        | FC5947    | 0.666666667   | 5.27643257242244e-118 | 5    | FBgn0259481;FBgn0038965;FBgn0003744;FBgn0011739;FBgn0261456                                                 | Mob2;mats;trc;wts;hpo                               | NA;1.00;NA;1.00;1.00                     | compound eye development;eye photoreceptor cell differentiation;compound eye photoreceptor cell differentiation;photoreceptor cell differentiation;compound eye morphogenesis                                                                                          |
| Hpo related                       | D        | FC442     | 1             | 2.54150165579626e-52  | 3    | FBgn0004907;FBgn0001222;FBgn0020238                                                                         | 14-3-3zeta;Hsf;14-3-3epsilon                        | 1.00;NA;1.00                             | HSF1-YWHAE complex                                                                                                                                                                                                                                                     |
| Hpo related                       | E        | FC4391    | 1             | 2.54150165579626e-52  | 3    | FBgn0034970;FBgn0003345;FBgn0028999                                                                         | yki;sd;nerfin-1                                     | 1.00;1.00;NA                             | positive regulation of transcription, DNA-dependent;regulation of RNA biosynthetic process;regulation of transcription, DNA-dependent;regulation of transcription from RNA polymerase II promoter;positive regulation of transcription from RNA polymerase II promoter |
| Hpo related                       | F        | FC2915    | 0.5           | 1.31305854028783e-52  | 6    | FBgn0004907;FBgn0038606;FBgn0034970;FBgn0003345;FBgn0067864;FBgn0001263                                     | 14-3-3zeta;CG15803;yki;sd;Patj;inaD                 | 1.00;NA;1.00;1.00;NA;NA                  | TEAD2-multiprotein complex                                                                                                                                                                                                                                             |
| Endocytosis & vesicle trafficking | A        | FC939     | 1             | 2.54150165579626e-52  | 3    | FBgn0043012;FBgn0010380;FBgn0263350                                                                         | AP-2sigma;Bap;alpha-Adaptin                         | 0.16;1.00;1.00                           | AP2 adaptor complex                                                                                                                                                                                                                                                    |
| Endocytosis & vesicle trafficking | B        | FC1109    | 0.99          | 2.84100786050043e-51  | 3    | FBgn0035060;FBgn0031450;FBgn0027363                                                                         | Eps-15;Hrs;Stam                                     | 0.99;0.99;0.60                           | Protein-sorting complex (Stam2, Hgs, Eps15);Protein-sorting complex (Stam1, Hgs, Eps15)                                                                                                                                                                                |
| Endocytosis & vesicle trafficking | C        | FC338     | 0.985         | 2.58573973768224e-204 | 4    | FBgn0023388;FBgn0035060;FBgn0032341;FBgn0016693                                                             | Dap160;Eps-15;Reps;Past1                            | 1.00;0.99;NA;0.98                        | negative regulation of signal transduction;negative regulation of Notch signaling pathway;synaptic vesicle endocytosis;regulation of neurotransmitter levels;neurotransmitter secretion                                                                                |
| Endocytosis & vesicle trafficking | D        | FC5980    | 0.6725        | 4.52265862489505e-96  | 6    | FBgn0000319;FBgn0024814;FBgn0016693;FBgn0035147;FBgn0036309;FBgn0032393                                     | Chc;Clc;Past1;Gale;Hip1;CG12264                     | 1.00;0.55;0.98;0.24;NA;0.92              | synaptic vesicle budding;synaptic vesicle endocytosis;synaptic vesicle budding from presynaptic membrane;sperm individualization;synaptic vesicle coating                                                                                                              |
| Endocytosis & vesicle trafficking | E        | FC5746    | 0.636         | 0                     | 9    | FBgn0000319;FBgn0016700;FBgn0014009;FBgn0015795;FBgn0051523;FBgn0014010;FBgn0051522;FBgn0010348;FBgn0015795 | Chc;Rab1;Rab2;Rab6;CG31523;Rab5;CG31522;Arf79F;Rab7 | 1.00;0.72;0.27;0.41;NA;0.84;NA;0.99;0.94 | secretion by cell;membrane invagination;endocytosis;protein transport;small GTPase mediated signal transduction                                                                                                                                                        |
| Endocytosis & vesicle trafficking | D        | FC1889    | 0.55          | 1.23654543945063e-15  | 3    | FBgn0000319;FBgn0024814;FBgn0026418                                                                         | Chc;Clc;Hsc70Cb                                     | 1.00;0.55;0.00                           | synaptic vesicle budding;synaptic vesicle endocytosis;synaptic vesicle budding from presynaptic membrane;synaptic vesicle coating;neurotransmitter secretion                                                                                                           |

|                                   |   |        |            |                       |    |                                                                                                                                                |                                                                                 |                                                           |                                                                                                                                                                                  |
|-----------------------------------|---|--------|------------|-----------------------|----|------------------------------------------------------------------------------------------------------------------------------------------------|---------------------------------------------------------------------------------|-----------------------------------------------------------|----------------------------------------------------------------------------------------------------------------------------------------------------------------------------------|
| Endocytosis & vesicle trafficking | G | FC5548 | 0.51666667 | 2.0124225665123e-70   | 5  | FBgn0000319;FBgn0014143;FBgn0024814;FBgn0027835;FBgn0036309                                                                                    | Chc;croc;Clc;Dp1;Hip1                                                           | 1.00;0.00;0.55;1.00;NA                                    | synaptic vesicle budding;synaptic vesicle endocytosis;synaptic vesicle budding from presynaptic membrane;synaptic vesicle coating;neurotransmitter secretion                     |
| Nucleocytoplasmic transport       | A | FC139  | 0.99       | 2.84100786050043e-51  | 3  | FBgn0020255;FBgn0039302;FBgn0262743                                                                                                            | ran;Nup358;Fs(2)Ket                                                             | 0.99;1.00;NA                                              | RANBP1-RAN-KPNB1 complex                                                                                                                                                         |
| Nucleocytoplasmic transport       | B | FC3622 | 0.845      | 1.86852313890594e-152 | 6  | FBgn0032961;FBgn0014189;FBgn0010348;FBgn0031661;FBgn0033264;FBgn0024509                                                                        | CG1416;Hel25E;Arf79F;Gmd;Nup50;sec13                                            | 0.73;0.79;0.99;0.00;0.98;0.88                             | transmembrane receptor protein serine/threonine kinase signaling pathway;nucleocytoplasmic transport;nuclear import;protein import into nucleus;SMAD protein import into nucleus |
| Nucleocytoplasmic transport       | C | FC5511 | 0.6475     | 5.68815984460322e-89  | 6  | FBgn0020255;FBgn0010621;FBgn0039302;FBgn0003346;FBgn0260990;FBgn0028411                                                                        | ran;Cct5;Nup358;RanGap;yata;Nxt1                                                | 0.99;0.54;1.00;0.98;0.08;NA                               | intracellular protein transport;nuclear transport;nucleocytoplasmic transport;protein transport;intracellular transport                                                          |
| Nucleocytoplasmic transport       | D | FC5909 | 0.586      | 1.68632734953424e-66  | 7  | FBgn0020255;FBgn0039302;FBgn0037364;FBgn0002638;FBgn0003346;FBgn0020497;FBgn0028411                                                            | ran;Nup358;Rab23;Bj1;RanGap;emb;Nxt1                                            | 0.99;1.00;NA;0.96;0.98;NA;NA                              | intracellular protein transport;nuclear transport;nucleocytoplasmic transport;protein transport;protein targeting                                                                |
| Nucleocytoplasmic transport       | E | FC4002 | 0.4925     | 5.1864582501542e-51   | 6  | FBgn0020255;FBgn0039302;FBgn0003321;FBgn0052484;FBgn0003346;FBgn0028411                                                                        | ran;Nup358;sbr;Sk2;RanGap;Nxt1                                                  | 0.99;1.00;NA;NA;0.98;NA                                   | intracellular protein transport;nuclear transport;nucleocytoplasmic transport;protein transport;intracellular transport                                                          |
| Cytoskeleton organization         | A | FC3472 | 0.972      | 0                     | 9  | FBgn0000319;FBgn0003557;FBgn0016693;FBgn0025865;FBgn0004638;FBgn0036448;FBgn0261456;FBgn0000578;FBgn0036309                                    | Chc;Su(dx);Past1;Cortactin;drk;mop;hpo;ena;Hip1                                 | 1.00;NA;0.98;0.97;1.00;1.00;1.00;0.91;NA                  | compound eye development;regulation of cell communication;cytoskeleton organization;organ morphogenesis;eye development                                                          |
| Cytoskeleton organization         | B | FC4759 | 0.735      | 0                     | 10 | FBgn0000319;FBgn0016693;FBgn0025865;FBgn0004638;FBgn0024814;FBgn0261714;FBgn0261456;FBgn0000046;FBgn0000578;FBgn0036309                        | Chc;Past1;Cortactin;drk;Clc;Cpn;hpo;Act87E;ena;Hip1                             | 1.00;0.98;0.97;1.00;0.55;NA;1.00;NA;0.91;NA               | compound eye development;cytoskeleton organization;organ morphogenesis;eye development;sensory organ development                                                                 |
| Cytoskeleton organization         | C | FC3762 | 0.6125     | 1.73157490584624e-79  | 6  | FBgn0034691;FBgn0025865;FBgn0001961;FBgn0031799;FBgn0000578;FBgn0004638                                                                        | synj;Cortactin;Sop2;Pez;ena;drk                                                 | NA;0.97;0.00;0.57;0.91;1.00                               | regulation of cell shape;embryonic development via the syncytial blastoderm;actin filament organization;ovarian nurse cell to oocyte transport;actin cytoskeleton organization   |
| Cytoskeleton organization         | D | FC4004 | 0.42666667 | 0                     | 12 | FBgn0000100;FBgn0024833;FBgn0039635;FBgn002695;FBgn0015019;FBgn0086443;FBgn0024556;FBgn0037709;FBgn0026409;FBgn0039580;FBgn0003189;FBgn0027329 | RpLP0;AP-47;CG11876;Rpn1;Cctg;amma;Aats-asn;EftuM;CG8199;Mpcp;Gfat2;r;Tcp-1zeta | 0.00;0.00;0.51;0.02;0.90;0.79;1.00;NA;0.88;0.36;0.00;0.91 | microtubule-based process;mitotic cell cycle;cellular component organization or biogenesis at cellular level;microtubule cytoskeleton organization;organelle organization        |

|                        |        |             |                       |    |                                                                                                                                                                                     |                                                                                            |                                                                          |                                                                                                                                         |
|------------------------|--------|-------------|-----------------------|----|-------------------------------------------------------------------------------------------------------------------------------------------------------------------------------------|--------------------------------------------------------------------------------------------|--------------------------------------------------------------------------|-----------------------------------------------------------------------------------------------------------------------------------------|
| Spindle organization A | FC6008 | 0.668       | 0                     | 9  | FBgn0022786;FBgn0015019;FBgn0030086;FBgn0037632;FBgn0003676;FBgn0010621;FBgn0032444;FBgn0033342;FBgn0027329                                                                         | Hira;Cctgamma;CG7033;Tcp-1eta;T-cp1;Cct5;CG5525;CG8258;Tcp-1zeta                           | NA;0.90;1.00;0.64;0.53;0.54;0.69;0.57;0.91                               | mitotic spindle organization;spindle organization;microtubule cytoskeleton organization;cytoplasmic microtubule organization;M phase    |
| Spindle organization B | FC641  | 0.66        | 1.27557366192804e-22  | 3  | FBgn0027836;FBgn0086356;FBgn0011692                                                                                                                                                 | Dgp-1;tum;pav                                                                              | NA;0.95;0.66                                                             | mitotic spindle organization;centrosome organization;centrosome cycle;centrosome duplication;microtubule organizing center organization |
| Spindle organization C | FC4647 | 0.58        | 0                     | 15 | FBgn0029975;FBgn0014009;FBgn0022246;FBgn0029118;FBgn0037551;FBgn0037643;FBgn0014189;FBgn0015019;FBgn0010516;FBgn0039562;FBgn0038145;FBgn0039580;FBgn0032961;FBgn0014010;FBgn0027329 | CG1444;Rab2;Rpp30;Sucb;Gie;skap;Hel25E;Cctgamma;wal;Gp93;Droj2;Gfat2;CG1416;Rab5;Tcp-1zeta | 0.45;0.27;NA;0.56;0.39;0.74;0.79;0.90;0.53;0.67;0.03;0.36;0.73;0.84;0.91 | protein folding;mitotic spindle organization;spindle organization;small GTPase mediated signal transduction;M phase                     |
| Spindle organization D | FC4275 | 0.531666667 | 0                     | 10 | FBgn0003139;FBgn0030086;FBgn0003676;FBgn0037632;FBgn0010621;FBgn0023423;FBgn0051852;FBgn0004889;FBgn0033342;FBgn0027329                                                             | PpV;CG7033;T-cp1;Tcp-1eta;Cct5;slmb;Tap42;tws;CG8258;Tcp-1zeta                             | NA;1.00;0.53;0.64;0.54;1.00;NA;NA;0.57;0.91                              | mitotic spindle organization;neurogenesis;spindle organization;cytoskeleton organization;microtubule cytoskeleton organization          |
| Spindle organization E | FC5405 | 0.488571429 | 0                     | 11 | FBgn0021874;FBgn0015019;FBgn0030086;FBgn0037632;FBgn0028687;FBgn0010621;FBgn0032444;FBgn0011745;FBgn0033342;FBgn0027329;FBgn0038617                                                 | Nle;Cctgamma;CG7033;Tcp-1eta;Rpt1;Cct5;CG5525;Arp87C;CG8258;Tcp-1zeta;CG12333              | NA;0.90;1.00;0.64;0.08;0.54;0.69;NA;0.57;0.91;NA                         | mitotic spindle organization;spindle organization;cytoskeleton organization;microtubule cytoskeleton organization;M phase               |
| Spindle organization F | FC68   | 0.456       | 3.76707656076704e-277 | 9  | FBgn0036237;FBgn0030086;FBgn0037632;FBgn0003676;FBgn0010621;FBgn0032444;FBgn0003388;FBgn0037980;FBgn0033342                                                                         | viaf;CG7033;Tcp-1eta;T-cp1;Cct5;CG5525;shd;CG3313;CG8258                                   | NA;1.00;0.64;0.53;0.54;0.69;NA;NA;0.57                                   | mitotic spindle organization;spindle organization;microtubule cytoskeleton organization;cytoplasmic microtubule organization;M phase    |
| Spindle organization G | FC4608 | 0.455714286 | 8.16928652216876e-318 | 11 | FBgn0013770;FBgn0030086;FBgn0003676;FBgn0037632;FBgn0010621;FBgn0036023;FBgn0037980;FBgn0004889;FBgn0051852;FBgn0033342;FBgn0027329                                                 | Cp1;CG7033;T-cp1;Tcp-1eta;Cct5;CG18179;CG3313;tws;Tap42;CG8258;Tcp-1zeta                   | 0.96;1.00;0.53;0.64;0.54;NA;NA;NA;0.57;0.91                              | protein folding;mitotic spindle organization;spindle organization;microtubule cytoskeleton organization;M phase                         |
| Spindle organization H | FC6462 | 0.455714286 | 8.16928652216876e-318 | 11 | FBgn0000319;FBgn0030086;FBgn0003676;FBgn0037632;FBgn0010621;FBgn0030499;FBgn0051852;FBgn0004889;FBgn0033342;FBgn0038617;FBgn0027329                                                 | Chc;CG7033;T-cp1;Tcp-1eta;Cct5;CG11178;Tap42;tws;CG8258;CG12333;Tcp-1zeta                  | 1.00;1.00;0.53;0.64;0.54;NA;NA;NA;0.57;NA;0.91                           | mitotic spindle organization;spindle organization;microtubule cytoskeleton organization;cytoplasmic microtubule organization;M phase    |

|                        |        |             |             |                       |    |                                                                                                                                                                                     |                                                                                                       |                                                                      |                                                                                                                                      |
|------------------------|--------|-------------|-------------|-----------------------|----|-------------------------------------------------------------------------------------------------------------------------------------------------------------------------------------|-------------------------------------------------------------------------------------------------------|----------------------------------------------------------------------|--------------------------------------------------------------------------------------------------------------------------------------|
| Spindle organization I | FC5842 | 0.43        | 0           |                       | 15 | FBgn0036500;FBgn0036237;FBgn0015019;FBgn0030086;FBgn0011571;FBgn0034931;FBgn0003676;FBgn0037632;FBgn0010621;FBgn0032444;FBgn0025825;FBgn0039417;FBgn0033342;FBgn0027329;FBgn0000382 | CG7275;viaf;Cctgamma;CG7033;caz;CG2812;T-cp1;T-cp-1eta;Cct5;CG5525;Hdac3;CG6073;CG8258;T-cp-1zeta;csw | NA;NA;0.90;1.00;0.91;NA;0.53;0.64;0.54;0.69;NA;NA;0.57;0.91;NA       | protein folding;mitotic spindle organization;spindle organization;cytoskeleton organization;microtubule cytoskeleton organization    |
| Spindle organization J | FC6555 | 0.43        | 0           |                       | 15 | FBgn0002528;FBgn0036500;FBgn0036237;FBgn0015019;FBgn0030086;FBgn0034931;FBgn0003676;FBgn0037632;FBgn0010621;FBgn0000579;FBgn0032444;FBgn0025825;FBgn0034937;FBgn0033342;FBgn0027329 | LanB2;CG7275;viaf;Cctgamma;CG7033;CG2812;T-cp1;T-cp-1eta;Cct5;Eno;CG5525;Hdac3;fzr2;CG8258;T-cp-1zeta | 0.00;NA;NA;0.90;1.00;NA;0.53;0.64;0.54;0.94;0.69;NA;NA;0.57;0.91     | mitotic spindle organization;spindle organization;microtubule cytoskeleton organization;cytoplasmic microtubule organization;M phase |
| Spindle organization K | FC3297 | 0.416666667 | 0           |                       | 10 | FBgn0260439;FBgn0015622;FBgn0037632;FBgn0005674;FBgn0026409;FBgn0034277;FBgn0031497;FBgn0032456;FBgn0033342;FBgn0027329                                                             | Pp2A-29B;Cnx99A;T-cp-1eta;Aats-glupro;Mpcp;CG6370;CG17259;MRP;CG8258;T-cp-1zeta                       | 0.00;NA;0.64;0.38;0.88;0.65;0.26;0.00;0.57;0.91                      | mitotic spindle organization;spindle organization;cytoskeleton organization;microtubule cytoskeleton organization;M phase            |
| Metabolism             | A      | FC5993      | 0.773333333 | 3.09402968839866e-159 | 5  | FBgn0039562;FBgn0034277;FBgn0014868;FBgn0014189;FBgn0010348                                                                                                                         | Gp93;CG6370;Ost48;Hel25E;Arf79F                                                                       | 0.67;0.65;0.86;0.79;0.99                                             | cellular protein metabolic process;cellular macromolecule metabolic process;macromolecule metabolic process                          |
| Metabolism             | B      | FC5224      | 0.6425      | 0                     | 8  | FBgn0011826;FBgn0015019;FBgn0030086;FBgn0020369;FBgn0086443;FBgn0028687;FBgn0032961;FBgn0027329                                                                                     | Pp2B-14D;Cctgamma;CG7033;Pros45;Aats-asn;Rpt1;CG1416;T-cp-1zeta                                       | NA;0.90;1.00;0.15;0.79;0.08;0.73;0.91                                | cell cycle phase;cellular protein metabolic process;cellular macromolecule metabolic process;protein metabolic process;M phase       |
| Metabolism             | C      | FC3863      | 0.576       | 3.31525017782629e-64  | 7  | FBgn0029118;FBgn0032444;FBgn0020369;FBgn0027329;FBgn0033342;FBgn0028687;FBgn0032393                                                                                                 | Sucb;CG5525;Pros45;T-cp-1zeta;CG8258;Rpt1;CG12264                                                     | 0.56;0.69;0.15;0.91;0.57;0.08;0.92                                   | metabolic process                                                                                                                    |
| Metabolism             | D      | FC1366      | 0.54        | 0                     | 10 | FBgn0001258;FBgn0003178;FBgn0086443;FBgn000517;FBgn0038145;FBgn0032961;FBgn0013675;FBgn0004636;FBgn0250814;FBgn0027329                                                              | ImpL3;PyK;Aats-asn;sta;Droj2;CG1416;mt;Coll;R;CG4169;T-cp-1zeta                                       | 0.79;0.00;0.79;0.90;0.03;0.73;0.00;0.00;0.99;0.91                    | cellular metabolic process;metabolic process                                                                                         |
| Metabolism             | E      | FC5204      | 0.498888889 | 0                     | 15 | FBgn0022246;FBgn0029118;FBgn0037643;FBgn0014189;FBgn0015019;FBgn0031758;FBgn0086443;FBgn0028687;FBgn0010516;FBgn0039562;FBgn0039580;FBgn0038145;FBgn0032961;FBgn0039674;FBgn0027329 | Rpp30;Sucb;skap;Hel25E;Cctgamma;Ucp4B;Aats-asn;Rpt1;wal;Gp93;Gfat2;Droj2;CG1416;CG1907;T-cp-1zeta     | NA;0.56;0.74;0.79;0.90;NA;0.79;0.08;0.53;0.67;0.36;0.03;0.73;NA;0.91 | metabolic process                                                                                                                    |
| Metabolism             | F      | FC4013      | 0.49        | 2.30479915346286e-12  | 3  | FBgn0038804;FBgn0020235;FBgn0033761                                                                                                                                                 | CG10877;ATPsyn-gamma;CG8778                                                                           | NA;0.78;0.49                                                         | metabolic process                                                                                                                    |

|                |   |        |             |                      |    |                                                                                                                                                                                                                                                                                                                                                                         |                                                                                                  |                                                                        |                                                                                                                                                                                                                                                  |
|----------------|---|--------|-------------|----------------------|----|-------------------------------------------------------------------------------------------------------------------------------------------------------------------------------------------------------------------------------------------------------------------------------------------------------------------------------------------------------------------------|--------------------------------------------------------------------------------------------------|------------------------------------------------------------------------|--------------------------------------------------------------------------------------------------------------------------------------------------------------------------------------------------------------------------------------------------|
| Metabolism     | G | FC5418 | 0.48        | 1.21809367219647e-60 | 5  | FBgn0039562;FBgn0037718;FBgn0030170;FBgn0032906;FBgn0010173                                                                                                                                                                                                                                                                                                             | Gp93;P58IPK;CG2990;RPA2;RpA-70                                                                   | 0.67;NA;NA;0.77;0.91                                                   | cellular metabolic process;cellular macromolecule metabolic process;macromolecule metabolic process;DNA replication;DNA metabolic process                                                                                                        |
| Metabolism     | H | FC5907 | 0.461111111 | 0                    | 15 | FBgn0029118;FBgn0015278;FBgn0037643;FBgn0015622;FBgn0053303;FBgn0024556;FBgn0010516;FBgn0039562;FBgn0005674;FBgn0039580;FBgn0026409;FBgn0034277;FBgn0003189;FBgn0027291;FBgn0031497;FBgn0029975;FBgn0014868;FBgn0022246;FBgn0029118;FBgn0028419;FBgn0021761;FBgn0037643;FBgn0053303;FBgn0039562;FBgn0025592;FBgn0038145;FBgn0010516;FBgn0026409;FBgn0039580;FBgn0034277 | Sucb;Pi3K68D;skap;Cnx99A;CG33303;EFTuM;wal;Gp93;Aats-glupro;Gfat2;Mpcp;CG6370;r;(1)G0156;CG17259 | 0.56;0.00;0.74;NA;0.77;1.00;0.53;0.67;0.38;0.36;0.88;0.65;0.00;NA;0.26 | cellular biosynthetic process;cellular metabolic process;biosynthetic process;metabolic process                                                                                                                                                  |
| Metabolism     | I | FC6412 | 0.443333333 | 0                    | 15 | FBgn0028419;FBgn0021761;FBgn0037643;FBgn0053303;FBgn0039562;FBgn0025592;FBgn0038145;FBgn0010516;FBgn0026409;FBgn0039580;FBgn0034277                                                                                                                                                                                                                                     | CG1444;Ost48;Rpp30;Sucb;Krh2;Nup154;skap;CG33303;Gp93;Gyk;Droj2;wal;Mpcp;Gfat2;CG6370            | 0.45;0.86;NA;0.56;NA;NA;0.74;0.77;0.67;NA;0.03;0.53;0.88;0.36;0.65     | metabolic process                                                                                                                                                                                                                                |
| DNA processing | A | FC2304 | 0.77        | 6.87196739596841e-31 | 3  | FBgn0036248;FBgn0032906;FBgn0010173                                                                                                                                                                                                                                                                                                                                     | ssp;RPA2;RpA-70                                                                                  | NA;0.77;0.91                                                           | DNA replication factor A complex                                                                                                                                                                                                                 |
| DNA processing | B | FC2429 | 0.77        | 6.87196739596841e-31 | 3  | FBgn0030322;FBgn0032906;FBgn0010173                                                                                                                                                                                                                                                                                                                                     | CG15220;RPA2;RpA-70                                                                              | 0.48;0.77;0.91                                                         | DNA replication factor A complex;RPA complex;RP-A                                                                                                                                                                                                |
| DNA processing | C | FC1187 | 0.41        | 1.34840166732008e-08 | 3  | FBgn0036415;FBgn0004432;FBgn0031392                                                                                                                                                                                                                                                                                                                                     | CG7768;Cyp1;AIF                                                                                  | NA;0.64;0.41                                                           | AIF-CYPA-DNA complex                                                                                                                                                                                                                             |
| RNA processing | A | FC5349 | 0.6         | 1.1897800574984e-18  | 3  | FBgn0004237;FBgn0004401;FBgn0004227                                                                                                                                                                                                                                                                                                                                     | Hrb87F;Pep;nonA                                                                                  | 0.02;0.60;0.82                                                         | RNA splicing, via transesterification reactions with bulged adenosine as nucleophile;RNA splicing, via transesterification reactions;nuclear mRNA splicing, via spliceosome;regulation of nuclear mRNA splicing, via spliceosome;mRNA processing |
| RNA processing | B | FC6254 | 0.4275      | 3.37913931142882e-38 | 6  | FBgn0035872;FBgn0036023;FBgn0035213;FBgn0035987;FBgn0037182;FBgn0005556                                                                                                                                                                                                                                                                                                 | CG7185;CG18179;CG2199;CG3689;ArfGAP3;Ef1alpha48D                                                 | 1.00;NA;NA;1.00;0.71;0.00                                              | nucleic acid phosphodiester bond hydrolysis;mRNA cleavage                                                                                                                                                                                        |
| RNA processing | C | FC4512 | 0.4         | 2.16315868783119e-30 | 7  | FBgn0035872;FBgn0036023;FBgn0035213;FBgn0035987;FBgn00261641;FBgn0030734;FBgn0051235                                                                                                                                                                                                                                                                                    | CG7185;CG18179;CG2199;CG3689;CG42724;CG9911;CG31235                                              | 1.00;NA;NA;1.00;0.00;1.00;NA                                           | nucleic acid phosphodiester bond hydrolysis;mRNA metabolic process;mRNA cleavage;mRNA processing;RNA processing                                                                                                                                  |
| CCT complex    |   | FC376  | 0.7         | 0                    | 8  | FBgn0015019;FBgn0030086;FBgn0037632;FBgn0003676;FBgn0010621;FBgn0032444;FBgn0027329;FBgn0033342                                                                                                                                                                                                                                                                         | Cctgamma;CG7033;Tc p-1eta;T-cp1;Cct5;CG5525;Tc p-1zeta;CG8258                                    | 0.90;1.00;0.64;0.53;0.54;0.69;0.91;0.57                                | CCT complex (chaperonin containing TCP1 complex);CCT complex (chaperonin containing TCP1 complex), testis specific;chaperonin-containing T-complex;CCT micro-complex                                                                             |

|             |        |        |                       |   |                                                                                                             |                                                                 |                                            |                                                                                                                                                                                                                    |
|-------------|--------|--------|-----------------------|---|-------------------------------------------------------------------------------------------------------------|-----------------------------------------------------------------|--------------------------------------------|--------------------------------------------------------------------------------------------------------------------------------------------------------------------------------------------------------------------|
| Proteolysis | FC4178 | 0.452  | 2.80295259499886e-272 | 9 | FBgn0033607;FBgn0015019;FBgn0030086;FBgn0020369;FBgn0028684;FBgn0028687;FBgn0032961;FBgn0028685;FBgn0027329 | CG9062;Cctgamma;CG7033;Pros45;Tbp-1;Rpt1;CG1416;Rpt4;Tc p-1zeta | NA;0.90;1.00;0.15;0.00;0.08;0.73;0.40;0.91 | proteolysis;macromolecule catabolic process;protein metabolic process;catabolic process;protein catabolic process                                                                                                  |
| Cell shape  | FC3331 | 0.5775 | 1.54874936104184e-70  | 6 | FBgn0083969;FBgn0010348;FBgn0015790;FBgn0262125;FBgn0033339;FBgn0024509                                     | CG34133;Arf79F;Rab11;sec23;sec31;sec13                          | 0.06;0.99;0.38;0.00;1.00;0.88              | regulation of cell morphogenesis;regulation of cell shape;chitin-based larval cuticle pattern formation;cuticle development involved in chitin-based cuticle molting cycle;larval chitin-based cuticle development |

Type of file: table

Label: Table S9

Filename: 2013-Kwon-Science-Hippo\_table\_S9.xls

| ComplexID | Complex Score | P-value               | Size | Members_GeneID                                                                                                                       | Members_GeneSymbol                                                                | Members_SCValue               | Name                                                                                                                                                                       |
|-----------|---------------|-----------------------|------|--------------------------------------------------------------------------------------------------------------------------------------|-----------------------------------------------------------------------------------|-------------------------------|----------------------------------------------------------------------------------------------------------------------------------------------------------------------------|
| FC1122    | 91            | 0                     | 3    | FBgn0005632;FBgn0259174;FBgn0003557                                                                                                  | faf;Nedd4;Su(dx)                                                                  | 28;175;91                     | ITCH-FAM/USP9x complex                                                                                                                                                     |
| FC2086    | 78            | 0                     | 4    | FBgn0029006;FBgn0259174;FBgn0003557;FBgn0035402                                                                                      | lack;Nedd4;Su(dx);CG12082                                                         | 65;175;91;NA                  | negative regulation of Notch signaling pathway;receptor-mediated endocytosis;receptor internalization;ubiquitin-dependent protein catabolic process;protein ubiquitination |
| FC1198    | 45            | 0                     | 5    | FBgn0035872;FBgn0259174;FBgn0035987;FBgn0003557;FBgn0003277                                                                          | CG7185;Nedd4;CG3689;Su(dx);Rpl1215                                                | 25;175;19;91;NA               | CPSF6-ITCH-NUDT21-POLR2A complex                                                                                                                                           |
| FC939     | 30            | 0                     | 3    | FBgn0043012;FBgn0010380;FBgn0263350                                                                                                  | AP-2sigma;Bap;alpha-Adaptin                                                       | 5;30;37                       | AP2 adaptor complex                                                                                                                                                        |
| FC5365    | 23.5          | 0                     | 6    | FBgn0259174;FBgn0003557;FBgn0037607;FBgn0027356;FBgn0014002;FBgn0052177                                                              | Nedd4;Su(dx);CG8036;Amph;Pdi;Ndfip                                                | 175;91;3;NA;NA;NA             | cellular membrane organization;membrane invagination;vesicle-mediated transport;endocytosis;regulation of Notch signaling pathway                                          |
| FC324     | 16            | 2.68818693340787e-252 | 6    | FBgn0015834;FBgn0034237;FBgn0034258;FBgn0038796;FBgn0029629;FBgn0037249                                                              | Trip1;eIF3-S9;eIF3-S8;CG10881;CG8636;eIF3-S10                                     | 22;15;63;NA;6;21              | EIF3 complex (EIF3A, EIF3B, EIF3G, EIF3I, EIF3C)                                                                                                                           |
| FC2253    | 12            | 1.34581222785792e-73  | 3    | FBgn0028685;FBgn0020369;FBgn0028687                                                                                                  | Rpt4;Pros45;Rpt1                                                                  | 3;12;41                       | cellular response to stress;proteolysis;macromolecule catabolic process;response to DNA damage stimulus;protein catabolic process                                          |
| FC1671    | 12            | 1.34581222785792e-73  | 3    | FBgn0263740;FBgn0261609;FBgn0004926                                                                                                  | eIF-2gamma;eIF-2alpha;eIF-2beta                                                   | 12;27;1                       | eIF2                                                                                                                                                                       |
| FC630     | 12            | 1.34581222785792e-73  | 3    | FBgn0263740;FBgn0036615;FBgn0029176                                                                                                  | eIF-2gamma;CG4933;Ef1gamma                                                        | 12;1;16                       | Unknown                                                                                                                                                                    |
| FC5224    | 11.75         | 0                     | 8    | FBgn0011826;FBgn0015019;FBgn0030086;FBgn0020369;FBgn0086443;FBgn0028687;FBgn0032961;FBgn0027329                                      | Pp2B-14D;Cctgamma;CG7033;Pros45;Aats-asn;Rpt1;CG1416;Tcp-1zeta                    | NA;3;11;12;18;41;6;24         | cell cycle phase;cellular protein metabolic process;cellular macromolecule metabolic process;protein metabolic process;M phase                                             |
| FC6118    | 11.28571429   | 0                     | 11   | FBgn0034237;FBgn0034258;FBgn0029629;FBgn0035423;FBgn0037249;FBgn0015834;FBgn0022023;FBgn00261609;FBgn0086706;FBgn0038467;FBgn0027619 | eIF3-S9;eIF3-S8;CG8636;CG17737;eIF3-S10;Trip1;eIF-3p40;eIF-2alpha;pix;CG3590;Adam | 15;63;6;8;21;22;7;27;NA;NA;NA | cellular macromolecule biosynthetic process;cellular protein metabolic process;translational initiation;translation;macromolecule biosynthetic process                     |
| FC3323    | 11.25         | 1.51057636517309e-124 | 6    | FBgn0001218;FBgn0003943;FBgn0261931;FBgn0086558;FBgn0028360;FBgn0052581                                                              | Hsc70-3;Ubi-p63E;CG42797;Ubi-p5E;I(1)G0148;CG32581                                | 85;NA;45;NA;NA;NA             | protein modification process;macromolecule modification                                                                                                                    |



|        |             |                      |    |                                                                                                                                                                                     |                                                                                                 |                                        |                                                                                                                                                                                                                 |
|--------|-------------|----------------------|----|-------------------------------------------------------------------------------------------------------------------------------------------------------------------------------------|-------------------------------------------------------------------------------------------------|----------------------------------------|-----------------------------------------------------------------------------------------------------------------------------------------------------------------------------------------------------------------|
| FC1635 | 10.42857143 | 0                    | 11 | FBgn0034237;FBgn0034654;FBgn0034258;FBgn0025582;FBgn0037270;FBgn0040227;FBgn0029629;FBgn0037249;FBgn0022023;FBgn0033902;FBgn0036258                                                 | eIF3-S9;CG10306;eIF3-S8;Int6;CG9769;eIF3p66;CG8636;eIF3-S10;eIF3p40;Tango7;CG5642               | 15;12;63;4;3;33;6;21                   | cellular biosynthetic process;cellular macromolecule biosynthetic process;cellular protein metabolic process;translational initiation;translation                                                               |
| FC3295 | 10          | 2.22130226714377e-98 | 6  | FBgn0017545;FBgn0032634;FBgn0026373;FBgn0261931;FBgn0261596;FBgn0014026                                                                                                             | RpS3A;Rpb11;Rpl33;CG42797;RpS24;Rpl7A                                                           | 31;NA;NA;45;4;5                        | cellular biosynthetic process;cellular macromolecule biosynthetic process;cellular macromolecule metabolic process;gene expression;macromolecule biosynthetic process                                           |
| FC4004 | 9.666666667 | 0                    | 12 | FBgn0000100;FBgn0024833;FBgn0039635;FBgn0028695;FBgn0015019;FBgn0086443;FBgn0024556;FBgn0037709;FBgn0026409;FBgn0039580;FBgn0003189;FBgn0027329                                     | RpLP0;AP-47;CG11876;Rpn1;Cctgama;Aats-asn;EftuM;CG8199;Mpcp;Gfat2;r;Tcp-1zeta                   | 16;1;1;20;3;18;4;NA;6;13;16;24         | microtubule-based process;mitotic cell cycle;cellular component organization or biogenesis at cellular level;microtubule cytoskeleton organization;organelle organization                                       |
| FC4725 | 9.5         | 8.79680907665156e-89 | 6  | FBgn0034438;FBgn0003079;FBgn0015402;FBgn0003178;FBgn0010269;FBgn0003676                                                                                                             | CG9416;phl;ksr;PyK;Dsor1;T-cp1                                                                  | NA;1;NA;44;NA;37                       | terminal region determination;epidermal growth factor receptor signaling pathway;torso signaling pathway;zygotic determination of anterior/posterior axis, embryo;anterior/posterior axis specification, embryo |
| FC5844 | 9.5         | 1.52610494812797e-20 | 4  | FBgn0038145;FBgn0085346;FBgn0031310;FBgn0034708                                                                                                                                     | Droj2;CG34317;CG4764;Vps35                                                                      | 38;NA;19;NA                            | Unknown                                                                                                                                                                                                         |
| FC6056 | 8.666666667 | 0                    | 15 | FBgn0261602;FBgn0034258;FBgn0028697;FBgn0038090;FBgn0033699;FBgn0010265;FBgn0039713;FBgn0036825;FBgn0013325;FBgn0039857;FBgn0037351;FBgn0031851;FBgn0005533;FBgn0033555;FBgn0011272 | RpL8;eIF3-S8;RpL15;CG10909;RpS11;RpS13;RpS8;RpL26;RpL11;RpL6;RpL13A;CG11188;RpS17;RpS15Ab;RpL13 | 6;63;8;NA;12;17;9;5;18;3;6;NA;18;NA;12 | mitotic spindle organization;spindle elongation;spindle organization;microtubule cytoskeleton organization;mitotic spindle elongation                                                                           |
| FC600  | 8.666666667 | 1.28797254138602e-17 | 5  | FBgn0010380;FBgn0263351;FBgn0024833;FBgn0030089;FBgn0039132                                                                                                                         | Bap;AP-50;AP-47;AP-1gamma;AP-1sigma                                                             | 30;25;1;NA;NA                          | AP-1 adaptor complex                                                                                                                                                                                            |
| FC5548 | 8.333333333 | 2.34233952348848e-16 | 5  | FBgn0000319;FBgn0014143;FBgn0024814;FBgn0027835;FBgn0036309                                                                                                                         | Chc;croc;Clc;Dp1;Hip1                                                                           | 24;NA;3;22;NA                          | synaptic vesicle budding;synaptic vesicle endocytosis;synaptic vesicle budding from presynaptic membrane;synaptic vesicle coating;neurotransmitter secretion                                                    |

|        |             |                      |    |                                                                                                                                                                                     |                                                                                                                 |                                         |                                                                                                                                                                                        |
|--------|-------------|----------------------|----|-------------------------------------------------------------------------------------------------------------------------------------------------------------------------------------|-----------------------------------------------------------------------------------------------------------------|-----------------------------------------|----------------------------------------------------------------------------------------------------------------------------------------------------------------------------------------|
| FC859  | 8           | 0                    | 15 | FBgn0034237;FBgn0034654;FBgn0037994;FBgn0034258;FBgn0025582;FBgn0037270;FBgn0040227;FBgn0029629;FBgn0037249;FBgn0015834;FBgn0033069;FBgn0022023;FBgn0038796;FBgn0036258;FBgn0027619 | elF3-S9;CG10306;CG4810;elF3-S8;Int6;CG9769;elF3-3p66;CG8636;elF3-S10;Trip1;CG8335;elF3-3p40;CG10881;CG5642;Adam | 15;12;NA;63;4;3;33;6;21;22;NA;7;NA;4;NA | elF3 complex (EIF3S6, EIF3S5, EIF3S4, EIF3S3, EIF3S6IP, EIF3S2, EIF3S9, EIF3S12, EIF3S10, EIF3S8, EIF3S1, EIF3S7)                                                                      |
| FC4949 | 8           | 4.25662418227254e-83 | 7  | FBgn0017545;FBgn0030693;FBgn0260010;FBgn0010409;FBgn0002622;FBgn0038252;FBgn0052581                                                                                                 | RpS3A;CG8974;rump;RpL18A;RpS3;CG3509;CG32581                                                                    | 31;NA;NA;9;39;NA;NA                     | cellular component organization at cellular level;mitotic cell cycle;cell cycle phase;organelle organization;M phase                                                                   |
| FC5175 | 7.875       | 0                    | 14 | FBgn0034237;FBgn0037994;FBgn0034654;FBgn0037270;FBgn0029629;FBgn0035423;FBgn0015834;FBgn0033902;FBgn0022023;FBgn0027087;FBgn0064225;FBgn0036258;FBgn0027619;FBgn0001942             | elF3-S9;CG4810;CG10306;CG9769;CG8636;CG17737;Trip1;Tango7;elF3-3p40;Aats-his;RpL5;CG5642;Adam;elF-4a            | 15;NA;12;3;6;8;22;8;7;NA;18;4;NA;23     | cellular biosynthetic process;cellular macromolecule biosynthetic process;cellular protein metabolic process;translational initiation;translation                                      |
| FC3288 | 7.75        | 4.21335704586891e-59 | 6  | FBgn0023213;FBgn0035827;FBgn0031011;FBgn0035823;FBgn0001942;FBgn0010488                                                                                                             | elF4G;Srp9;CG8034;elF4E-5;elF-4a;NAT1                                                                           | 34;NA;NA;NA;23;8                        | translational initiation;spindle elongation;salivary gland histolysis;salivary gland cell autophagic cell death;mitotic spindle elongation                                             |
| FC2084 | 7.714285714 | 0                    | 11 | FBgn0028686;FBgn0028695;FBgn0028692;FBgn0020369;FBgn0028684;FBgn0015282;FBgn0028687;FBgn0039788;FBgn0037742;FBgn0015283;FBgn0028685                                                 | Rpt3;Rpn1;Rpn2;Pros45;Tbp-1;Pros26.4;Rpt1;Rpt6R;Rpt3R;Pros54;Rpt4                                               | 7;20;5;12;6;11;41;NA;NA;10;3            | proteasome regulatory particle, base subcomplex                                                                                                                                        |
| FC3536 | 7.6         | 5.49081595321499e-75 | 7  | FBgn0027568;FBgn0030096;FBgn0033260;FBgn0001216;FBgn0034527;FBgn0260962;FBgn0025638                                                                                                 | Cand1;Zpr1;Cul-4;Hsc70-1;CG9945;pic;Roc1a                                                                       | 11;NA;4;23;NA;37;NA                     | DNA amplification;eggshell chorion gene amplification;protein ubiquitination involved in ubiquitin-dependent protein catabolic process;DNA biosynthetic process;protein ubiquitination |
| FC3746 | 6.75        | 7.12549106244263e-45 | 6  | FBgn0000319;FBgn0261279;FBgn0024814;FBgn0010380;FBgn0039955;FBgn0035995                                                                                                             | Chc;IqfR;Clc;Bap;CG41099;CG3529                                                                                 | 24;NA;3;30;NA;NA                        | vesicle coating;synaptic vesicle endocytosis;synaptic vesicle budding from presynaptic membrane;synaptic vesicle coating;neurotransmitter secretion                                    |
| FC5980 | 6.75        | 7.12549106244263e-45 | 6  | FBgn0000319;FBgn0024814;FBgn0016693;FBgn0035147;FBgn0036309;FBgn0032393                                                                                                             | Chc;Clc;Past1;Gale;Hip1;CG12264                                                                                 | 24;3;NA;NA;NA;24                        | synaptic vesicle budding;synaptic vesicle endocytosis;synaptic vesicle budding from presynaptic membrane;sperm individualization;synaptic vesicle coating                              |

|        |             |                      |    |                                                                                                                                                             |                                                                                            |                                      |                                                                                                                                                                                                         |
|--------|-------------|----------------------|----|-------------------------------------------------------------------------------------------------------------------------------------------------------------|--------------------------------------------------------------------------------------------|--------------------------------------|---------------------------------------------------------------------------------------------------------------------------------------------------------------------------------------------------------|
| FC5181 | 6.666666667 | 8.28023178308143e-11 | 5  | FBgn0087035;FBgn0031951;FBgn0034246;FBgn0037328;FBgn0003279                                                                                                 | AGO2;r2d2;Dcr-2;Rpl35A;Rpl4                                                                | 37;NA;NA;1;19                        | heterochromatin organization involved in chromatin silencing;RNA interference;chromatin silencing;siRNA loading onto RISC involved in RNA interference;production of siRNA involved in RNA interference |
| FC659  | 6.333333333 | 0                    | 12 | FBgn0261602;FBgn0038090;FBgn0003062;FBgn0010265;FBgn0033699;FBgn0041205;FBgn0086710;FBgn0024222;FBgn0001233;FBgn0039857;FBgn0011573;FBgn0003279             | Rpl8;CG10909;Fib;RpS13;RpS11;key;Rpl30;ird5;Hsp83;Rpl6;Cdc37;Rpl4                          | 6;NA;12;17;12;NA;5;NA;54;3;NA;19     | TNF-alpha/NF-kappa B signaling complex 6                                                                                                                                                                |
| FC4085 | 6.285714286 | 0                    | 13 | FBgn0034237;FBgn0015286;FBgn0034258;FBgn0038989;FBgn0004926;FBgn0037249;FBgn0015834;FBgn0022023;FBgn0261609;FBgn0086706;FBgn0034110;FBgn0030719;FBgn0027619 | eIF3-S9;Rala;eIF3-S8;CG6937;eIF-2beta;eIF-S10;Trip1;eIF-3p40;eIF-2alpha;pix;Atg9;eIF5;Adam | 15;NA;63;NA;1;21;22;7;27;NA;NA;NA;NA | cellular protein metabolic process;translational initiation;neurogenesis;translation;nervous system development                                                                                         |
| FC6664 | 6.2         | 6.55779109143777e-50 | 7  | FBgn0004856;FBgn0035136;FBgn0261609;FBgn0030719;FBgn0027835;FBgn004926;FBgn0010488                                                                          | Bx42;CG6905;eIF-2alpha;eIF5;Dp1;eIF-2beta;NAT1                                             | NA;NA;27;NA;22;1;8                   | nucleic acid metabolic process;cellular macromolecule metabolic process;nucleobase-containing compound metabolic process;RNA metabolic process;cellular nitrogen compound metabolic process             |
| FC6648 | 6           | 0                    | 10 | FBgn0034237;FBgn0034654;FBgn0037853;FBgn0039622;FBgn0261592;FBgn0033902;FBgn0022023;FBgn0031011;FBgn0260634;FBgn0001942                                     | eIF3-S9;CG10306;CG14696;eIF4E-6;RpS6;Tango7;eIF-3p40;CG8034;eIF4G2;eIF-4a                  | 15;12;NA;NA;9;8;7;NA;NA;23           | cellular biosynthetic process;cellular macromolecule biosynthetic process;cellular protein metabolic process;translational initiation;translation                                                       |
| FC232  | 6           | 8.99308817067913e-09 | 4  | FBgn0086605;FBgn0032640;FBgn0038571;FBgn0039147                                                                                                             | CG9853;Sgt;CG7215;CG10694                                                                  | 14;12;NA;NA                          | cellular process                                                                                                                                                                                        |
| FC3751 | 5.75        | 1.24194380448636e-32 | 6  | FBgn0261599;FBgn0028838;FBgn0001565;FBgn0035423;FBgn0034743;FBgn0033699                                                                                     | RpS29;CSN1a;Hlc;CG17737;RpS16;RpS11                                                        | 3;NA;NA;8;27;12                      | cellular macromolecule biosynthetic process;spindle elongation;gene expression;translation;mitotic spindle elongation                                                                                   |
| FC3225 | 5.714285714 | 0                    | 13 | FBgn0023213;FBgn0034237;FBgn0037994;FBgn0034654;FBgn0037270;FBgn0029629;FBgn0033902;FBgn0022023;FBgn0031883;FBgn0029067;FBgn0036258;FBgn0027619;FBgn0001942 | eIF4G;eIF3-S9;CG4810;CG10306;CG9769;CG8636;Tango7;eIF-3p40;CG11266;Dd;CG5642;Adam;eIF-4a   | 34;15;NA;12;3;6;8;7;NA;NA;4;NA;23    | cellular biosynthetic process;cellular macromolecule biosynthetic process;cellular protein metabolic process;translational initiation;translation                                                       |

|        |             |                       |    |                                                                                                                                                                                     |                                                                                                           |                                        |                                                                                                                                                   |
|--------|-------------|-----------------------|----|-------------------------------------------------------------------------------------------------------------------------------------------------------------------------------------|-----------------------------------------------------------------------------------------------------------|----------------------------------------|---------------------------------------------------------------------------------------------------------------------------------------------------|
| FC5599 | 5.666666667 | 0                     | 15 | FBgn0260439;FBgn0027571;FBgn0015794;FBgn0028695;FBgn0015019;FBgn0008635;FBgn0053303;FBgn0026409;FBgn0015039;FBgn0039580;FBgn0005674;FBgn0003189;FBgn0031497;FBgn0040237;FBgn003342  | Pp2A-29B;CG3523;Rab-RP4;Rpn1;Cctgamma;beta Cop;CG33303;Mpcp;Cyp9b2;Gfat2;Aats-glupro;r;CG17259;bor;CG8258 | 3;20;NA;20;3;2;16;6;NA;13;3;16;3;2;NA  | mitotic spindle organization;spindle organization                                                                                                 |
| FC5695 | 5.666666667 | 4.43424036607518e-08  | 5  | FBgn0029093;FBgn0029118;FBgn0013770;FBgn0030670;FBgn0035811                                                                                                                         | cathD;Sucb;Cp1;Pis;CG12262                                                                                | 3;17;9;NA;5                            | salivary gland morphogenesis;histolysis;salivary gland histolysis;salivary gland cell autophagic cell death;gland morphogenesis                   |
| FC4805 | 5.5         | 0                     | 14 | FBgn0034035;FBgn0261602;FBgn0038474;FBgn0025674;FBgn0052654;FBgn0036825;FBgn0261606;FBgn0017579;FBgn0002579;FBgn0005593;FBgn0005533;FBgn0024733;FBgn0261596;FBgn0011272             | CG8207;RpL8;mRpS11;Cy cK;Sec16;RpL26;RpL27A;RpL14;RpL36;RpL7;RpS17;RpL10;RpS24;RpL13                      | NA;6;NA;1;NA;5;11;11;4;2;18;11;4;12    | mitotic spindle organization;centrosome organization;centrosome cycle;centrosome duplication;mitotic spindle elongation                           |
| FC3801 | 5.5         | 1.56936880070576e-07  | 4  | FBgn0027568;FBgn0037894;FBgn0004462;FBgn0035440                                                                                                                                     | Cand1;Ranbp9;Pk17E;CG14969                                                                                | 11;20;NA;NA                            | cellular process                                                                                                                                  |
| FC909  | 5.25        | 2.94888778590399e-27  | 6  | FBgn0029148;FBgn0011824;FBgn0038090;FBgn0003062;FBgn0033548;FBgn0259937                                                                                                             | NHP2;CG4038;CG10909;Fib;CG7637;Nop60B                                                                     | 4;3;NA;12;2;18                         | rRNA metabolic process;ncRNA metabolic process;ncRNA processing;pseudouridine synthesis;rRNA processing                                           |
| FC5907 | 5.222222222 | 0                     | 15 | FBgn0029118;FBgn0015278;FBgn0037643;FBgn0015622;FBgn0053303;FBgn0024556;FBgn0010516;FBgn0039562;FBgn0005674;FBgn0039580;FBgn0026409;FBgn0034277;FBgn0003189;FBgn0027291;FBgn0031497 | Sucb;Pi3K68D;skap;Cnx99A;CG33303;EftuM;wal;Gp93;Aats-glupro;Gfat2;Mpcp;CG6370;r;l(1)G0156;CG17259         | 17;NA;11;NA;16;4;5;NA;3;13;6;NA;16;2;3 | cellular biosynthetic process;cellular metabolic process;biosynthetic process;metabolic process                                                   |
| FC4156 | 5.142857143 | 5.90270419999936e-276 | 11 | FBgn0037994;FBgn0034654;FBgn0037270;FBgn0035423;FBgn0000404;FBgn0030993;FBgn0033902;FBgn0022023;FBgn0039797;FBgn0036258;FBgn0001942                                                 | CG4810;CG10306;CG9769;CG17737;CycA;Mec2;Tan go7;eIF-3p40;CG1340;CG5642;eIF-4a                             | NA;12;3;8;NA;6;8;7;NA;4;23             | cellular biosynthetic process;cellular macromolecule biosynthetic process;cellular protein metabolic process;translational initiation;translation |

|        |             |                      |    |                                                                                                                                                                                     |                                                                                                     |                                       |                                                                                                                                                                    |
|--------|-------------|----------------------|----|-------------------------------------------------------------------------------------------------------------------------------------------------------------------------------------|-----------------------------------------------------------------------------------------------------|---------------------------------------|--------------------------------------------------------------------------------------------------------------------------------------------------------------------|
| FC4730 | 5.111111111 | 0                    | 15 | FBgn0029118;FBgn0039635;FBgn0037643;FBgn0028695;FBgn0015622;FBgn0015019;FBgn0008635;FBgn0024556;FBgn0037709;FBgn0005674;FBgn0026409;FBgn0039580;FBgn0003189;FBgn0031497;FBgn0033342 | Sucb;CG11876;skap;Rpn1;Cnx99A;Cctgamma;betaCop;EfTuM;CG8199;Aats-glupro;Mpcp;Gfat2;r;CG17259;CG8258 | 17;1;11;20;NA;3;2;4;NA;3;6;13;16;3;NA | cellular metabolic process;metabolic process                                                                                                                       |
| FC4370 | 5           | 1.64397749491974e-06 | 5  | FBgn0020626;FBgn0028379;FBgn0261710;FBgn0029687;FBgn0035165                                                                                                                         | Osbp;fan;nocte;Vap-33-1;CG13887                                                                     | NA;NA;30;14;1                         | spermatid development;cellularization;sperm individualization;spermatid differentiation                                                                            |
| FC377  | 5           | 2.32718138560669e-13 | 3  | FBgn0026136;FBgn0000258;FBgn0000259                                                                                                                                                 | CklIbeta2;CklIalpha;CklIbeta                                                                        | NA;31;5                               | Casein kinase II (beta-dimer, alpha, alpha');Casein kinase II (beta-dimer, alpha'-dimer);Casein kinase II (beta-dimer, alpha-dimer);CK2;Casein kinase II complex   |
| FC4344 | 5           | 2.32718138560669e-13 | 3  | FBgn0025724;FBgn0037549;FBgn0025725                                                                                                                                                 | beta'Cop;CG7878;alphaCop                                                                            | 4;5;15                                | establishment of protein localization;intracellular protein transport;retrograde vesicle-mediated transport, Golgi to ER;Golgi vesicle transport;protein transport |
